# Supplementary material for: Discriminating activating, deactivating and resistance variants in protein kinases
Source: Research Square preprint supplement (doi:10.21203/rs.3.rs-5001235/v1), 2024-09-30
Supplement: Supplementary file 1 [file 11dd38ab3e83368ee90855b8.xlsx]

## Sheet: A - PIM1_raw_readings
							Experiment 1
Mode	Absorbance
Name	pTyr_Absorbance
Measurement wavelength [nm]				450
Number of flashes				10
Settle time [ms]				50
Part of Plate				A1-H12
Start Time				2022-03-01 16:12:41
Temperature [°C]				37.1
ELISA														Crystal Violet Staining
<>	1	2	3	4	5	6	7	8	9	10	11	12		<>	1	2	3	4	5	6	7	8	9	10	11	12
A	0.0596	0.0623	0.0607	2.2955	3.1418	3.1235	0.0581	0.0595	0.0575	3.041	3.4556	3.6269		A	0.0546	0.0562	0.0568	0.2918	0.4537	0.203	0.0542	0.0548	0.0549	1.3538	0.5765	0.5715
B	1.8612	1.4879	1.482	1.9756	2.4514	2.1296	1.5934	1.6873	1.251	2.759	2.8988	3.7016		B	0.2596	0.2081	0.1297	0.3718	0.4743	0.2931	0.1883	0.1417	0.1448	1.8182	1.242	0.6649
C	1.3635	1.497	1.3925	1.7871	2.887	3.2379	2.0766	2.0515	1.7849	2.3642	2.9272	3.508		C	0.1884	0.1755	0.1199	0.2701	0.4651	1.1778	0.1492	0.1421	0.1503	1.4209	1.5585	0.9828
D	2.7636	3.1665	2.3206	0.0573	0.0588	0.0562	2.7661	3.3512	2.5273	0.0591	0.0599	0.058		D	1.6753	1.7179	0.6791	0.0464	0.1043	0.0744	0.6471	1.125	1.411	0.0464	0.0548	0.0463
E	2.4309	2.5423	3.4558	0.0598	0.0591	0.0658	2.1447	2.8465	3.43	0.0598	0.0589	0.0606		E	1.589	0.5052	1.5336	0.0593	0.0541	0.0589	0.2421	1.1685	1.448	0.0557	0.0561	0.0549
F	3.4531	2.1788	3.2426	0.0598	0.0594	0.0595	2.915	2.7555	2.9777	0.0596	0.0604	0.0593		F	1.7678	1.5232	0.5565	0.0565	0.0561	0.0552	1.5633	1.4145	0.7977	0.056	0.0568	0.0571
G	2.7363	3.0339	3.3711	0.0594	0.0611	0.0608	2.4419	2.6037	2.0245	0.0591	0.0632	0.0609		G	0.7556	1.2342	0.852	0.0548	0.0569	0.0569	0.8363	1.6794	0.6912	0.0559	0.059	0.0571
H	3.803	3.1618	3.7021	0.0601	0.0595	0.0587	2.7602	3.1372	2.9848	0.063	0.0583	0.0595		H	1.4028	1.0041	1.9062	0.0568	0.0546	0.0547	0.9076	1.8855	1.1708	0.0581	0.0541	0.0542
							Experiment 2
Mode	Absorbance
Name	pTyr_Absorbance
Measurement wavelength [nm]				450
Number of flashes				10
Settle time [ms]				50
Part of Plate				A1-H12
Start Time				2022-03-09 16:00:44
Temperature [°C]				37.2
ELISA														Crystal Violet Staining
<>	1	2	3	4	5	6	7	8	9	10	11	12		<>	1	2	3	4	5	6	7	8	9	10	11	12
A	0.0629	0.0672	0.0646	2.7208	2.2306	1.9867	0.0564	0.0613	0.0633	1.3207	1.9333	1.4907		A	0.0579	0.0579	0.0595	0.3584	0.4526	0.4755	0.058	0.0573	0.0568	0.3282	0.6174	0.4846
B	2.2145	2.6052	2.7378	2.7925	2.501	2.0445	2.2355	2.1759	1.9835	1.7979	1.6646	2.0277		B	0.5118	0.9009	0.767	0.5622	0.5462	0.4655	1.0333	0.8847	1.3707	0.603	0.4687	1.7839
C	2.7808	2.9947	2.96	3.5782	3.5846	2.5419	2.3727	2.4425	2.1088	2.6517	2.4049	1.9331		C	0.904	1.0635	1.1713	0.5642	0.9837	0.932	0.4188	0.6993	0.7223	1.468	2.1243	0.5997
D	2.6328	2.8731	3.1515	0.0635	0.0541	0.0605	2.7008	2.4529	2.3418	0.0546	0.1311	0.0903		D	0.5622	0.8325	0.992	0.0523	0.0476	0.0554	1.9618	2.0459	1.9021	0.0499	0.0947	0.0675
E	2.4606	2.7948	2.7137	0.0656	0.0596	0.0636	2.813	2.7884	2.5265	0.0643	0.0729	0.0714		E	1.0031	0.7005	0.5433	0.0597	0.0538	0.0577	1.5116	2.2116	2.3719	0.0585	0.0642	0.0585
F	2.693	2.4431	2.778	0.0597	0.0615	0.064	2.088	2.624	2.3619	0.0639	0.0643	0.0635		F	0.6058	0.4787	0.5374	0.0558	0.056	0.0573	0.4554	1.234	0.8366	0.0573	0.0587	0.0572
G	2.339	2.4994	2.933	0.0623	0.0603	0.0624	2.434	3.141	2.7245	0.067	0.0612	0.0602		G	0.3283	0.7604	1.0502	0.0561	0.0587	0.0569	0.6386	1.8233	1.0597	0.0614	0.0549	0.057
H	2.4242	2.4674	3.1278	0.0646	0.0595	0.0621	2.5123	2.3123	2.8164	0.0675	0.0594	0.0629		H	0.7397	1.3323	0.7535	0.0584	0.0553	0.0571	0.4504	0.5208	1.7878	0.061	0.0547	0.0599
							Experiment 3
Mode	Absorbance
Name	pTyr_Absorbance
Measurement wavelength [nm]				450
Number of flashes				10
Settle time [ms]				50
Part of Plate				A1-H12
Start Time				2022-03-15 15:22:25
Temperature [°C]				27.6
ELISA														Crystal Violet Staining
<>	1	2	3	4	5	6	7	8	9	10	11	12		<>	1	2	3	4	5	6	7	8	9	10	11	12
A	0.0611	0.0638	0.06	4	3.7543	4	0.0602	0.0594	0.0625	3.6261	3.748	3.8322		A	0.0551	0.054	0.0553	1.9733	1.4462	1.4844	0.0546	0.0547	0.0556	1.1769	1.4278	1.7477
B	4	4	4	4	3.8052	3.8466	4	3.1892	3.6057	3.6544	3.712	2.9725		B	1.857	0.8327	1.1311	1.1177	0.8759	0.9503	1.1595	0.8672	0.9251	1.0984	0.9309	0.8597
C	4	3.8586	4	4	3.6198	3.4545	3.7749	3.4945	3.6525	3.4628	3.7381	3.9791		C	1.0531	0.7231	0.8919	1.2516	1.054	0.7022	0.9153	0.6504	1.0007	0.7286	0.7718	1.4885
D	4	4	4	0.0612	0.059	0.0599	3.7312	3.2238	2.5322	0.0602	0.0532	0.0632		D	1.2429	1.4318	1.1957	0.0644	0.0689	0.0562	1.2137	0.9466	1.0526	0.0606	0.0583	0.0629
E	4	4	3.9335	0.0621	0.0614	0.062	3.7041	3.719	3.7937	0.0647	0.0637	0.0607		E	1.4173	1.086	1.405	0.0561	0.0573	0.056	1.5885	1.0302	1.6723	0.0577	0.0569	0.0546
F	4.0068	4	3.775	0.0625	0.06	0.062	4	2.235	3.836	0.0626	0.0601	0.0619		F	1.1668	1.2458	1.0664	0.057	0.0544	0.0562	1.2091	1.0723	1.6989	0.0558	0.0555	0.0564
G	3.8159	3.9169	3.5206	0.0616	0.0599	0.0618	3.8184	3.8631	3.7583	0.062	0.0614	0.0604		G	1.1481	1.0336	1.3221	0.0558	0.0554	0.0561	1.4129	1.4395	1.9381	0.0556	0.0545	0.0571
H	3.8223	3.6884	3.7614	0.0601	0.0622	0.0604	3.7285	3.5167	3.2103	0.0613	0.058	0.0604		H	1.0342	0.6176	0.8411	0.0542	0.056	0.0573	1.3818	0.8436	1.5675	0.0564	0.0569	0.0561
							Experiment 4
Mode	Absorbance
Name	pTyr_Absorbance
Measurement wavelength [nm]				450
Number of flashes				10
Settle time [ms]				50
Part of Plate				A1-H12
Start Time				2022-03-29 15:05:16
Temperature [°C]				28.5
ELISA														Crystal Violet Staining
<>	1	2	3	4	5	6	7	8	9	10	11	12		<>	1	2	3	4	5	6	7	8	9	10	11	12
A	0.062	0.0612	0.0618	1.8749	1.8088	1.6821	0.0598	0.0606	0.062	0.9971	1.5885	1.1135		A	0.0561	0.056	0.0572	0.3351	0.3109	0.2838	0.0549	0.0553	0.0571	0.2696	0.2995	0.2893
B	1.6825	1.1585	1.8457	1.9289	1.5326	1.578	1.8298	1.4474	1.4824	1.2907	1.6863	0.9803		B	0.7037	0.6513	0.6409	0.3191	0.3445	0.3358	0.3464	0.5244	0.288	0.2877	0.3042	0.3321
C	2.1992	2.263	1.9595	1.6558	2.0808	1.5064	2.1919	1.7279	2.0256	1.6782	1.9861	2.0203		C	0.6662	0.6953	1.1461	0.3549	0.4734	0.3376	0.6045	0.7713	1.1028	0.2585	0.2705	1.3294
D	2.5272	2.9108	3.1436	0.0497	0.05	0.0501	2.8523	2.0462	2.887	0.053	0.0509	0.0645		D	1.9205	1.8916	1.59	0.0452	0.045	0.0448	2.4314	1.6307	2.0881	0.0443	0.0443	0.0522
E	2.5327	2.4942	2.4853	0.0619	0.0614	0.0611	2.3069	2.7498	2.1685	0.0492	0.0614	0.0612		E	1.8593	1.979	1.5174	0.0561	0.056	0.0555	1.699	1.8745	1.9393	0.043	0.0555	0.0555
F	2.303	2.0404	1.7449	0.0622	0.061	0.0615	1.7938	2.3175	1.6806	0.0529	0.0624	0.061		F	1.1421	1.1483	0.3322	0.0568	0.0547	0.0557	0.2568	1.3763	0.2417	0.0456	0.0581	0.0552
G	2.603	1.7277	1.6364	0.0608	0.0597	0.0623	2.2133	1.9455	1.8366	0.0599	0.0623	0.0626		G	0.6734	0.3437	0.9986	0.0551	0.0558	0.056	0.4581	0.3222	0.3096	0.0541	0.057	0.0595
H	1.6462	1.5095	1.9377	0.0601	0.061	0.0602	2.0811	1.9518	1.8197	0.0577	0.0623	0.0607		H	0.4018	0.3074	0.7719	0.0549	0.0555	0.0554	0.25	0.2616	0.4545	0.0546	0.0654	0.0552

## Sheet: B - PIM1_Normalized
absolut	Crystal Violet Corrected													absolut	Crystal Violet & P38 Corrected
	anti p38
		-tet	-tet	-tet	-tet		+tet	+tet	+tet	+tet					anti phospho-p38
	WT		1.84046	6.49581	1.65359			1.4363	4.26115	1.93882						-tet	-tet	-tet	-tet		+tet	+tet	+tet	+tet
	PIM1_WT	2.75023	2.1197	3.87672	3.09317		2.80967	2.1434	3.5948	2.72735					WT	1.13528	0.8324	1.05283	0.962948		1.46195	2.00879	0.882043	0.49655
	PIM1_T23I	2.95817	2.97212	3.96119	3.44378		3.0471	2.6664	3.0834	4.00912					PIM1_WT	0.751853	0.845734	0.907331	1.083		1.16412	1.05863	0.820537	1.27978
	PIM1_S97N	3.55563	2.28821	4.87455	1.54263		2.8536	4.11718	4.10625	2.32241					PIM1_T23I	1.20152	0.559936	0.782102	0.561611		0.884651	0.555853	0.781797	0.594478
	PIM1_Q127E	2.18553	2.61199	4.45995	1.61601		2.63733	2.3825	3.94405	1.4384					PIM1_S97N	0.62347	0.713958	1.04544	0.86863		0.329024	0.30314	1.85404	0.375066
															PIM1_Q127E	2.39943	0.626293	1.00804	0.753182		2.95656	0.680959	1.28379	0.979493
	anti phospho-p38
		-tet	-tet	-tet	-tet		+tet	+tet	+tet	+tet				percent	Crystal Violet & P38 Corrected
	WT		2.09071	8.43035	1.52297			4.16	5.08132	0.889439
	PIM1_WT	2.88153	2.48939	3.85512	3.08829		2.80707	2.73797	3.32164	3.19562					anti phospho-p38
	PIM1_T23I	2.88273	1.44735	3.80226	1.33727		2.3567	1.23037	2.95235	1.43824						-tet	-tet	-tet	Mean	STDEV	+tet	+tet	+tet	+tet	Mean	STDEV
	PIM1_S97N	2.96073	1.74052	2.52266	1.6491		3.3745	1.5361	3.63818	1.07094					WT		1	1				2.41325	0.837786	0.515656	1.25556	1.01544
	PIM1_Q127E	3.1198	1.54163	4.30307	1.24492		2.93313	1.23854	4.49218	1.47246					PIM1_WT	1	1	1			1.54833	1.25172	0.904342	1.1817	1.22152	0.264514
															PIM1_T23I	1	1	1			0.736276	0.992707	0.999611	1.05852	0.946779	0.143409
percent	Crystal Violet Corrected														PIM1_S97N	1	1	1			0.52773	0.424591	1.77346	0.43179	0.789393	0.657728
	anti p38														PIM1_Q127E	1	1	1			1.23219	1.08729	1.27355	1.30047	1.22337	0.0949728					1	1	1
		-tet	-tet	-tet	Mean	STDEV	+tet	+tet	+tet	+tet	Mean	STDEV
	WT		1	1				0.780403	0.655985	1.17249	0.869627	0.269566
	PIM1_WT	1	1	1			1.02161	1.01118	0.927278	0.881735	0.96045	0.067356			Outlier Test = Z scores via (Raw Measurement X - Mean µ) /STDEV, cutoff is often +/-3															anti phospho-p38		Z score corrected results
	PIM1_T23I	1	1	1			1.03006	0.897137	0.778403	1.16416	0.967442	0.166633				+tet	+tet	+tet	+tet		Means				STDEVs						+tet	+tet	+tet	+tet	Mean	STDEV	Ttest vs -tet control	Ttest vs WT
	PIM1_S97N	1	1	1			0.802557	1.7993	0.842387	1.50549	1.23743	0.49421			WT	-1.23647	7.62368	-0.467034	-0.996267		1.25556	0.676721	1.46445	1.62552	1.01544	0.22778	1.3418	1.11402		WT			0.837786	0.515656	0.676721	0.22778	0.294262	1
	PIM1_Q127E	1	1	1			1.20672	0.912138	0.884325	0.890096	0.973321	0.156062			PIM1_WT	2.37184	0.124658	-2.17284	-0.164737		1.11259	1.21146	1.32725	1.2348	0.183714	0.323023	0.194634	0.322327		PIM1_WT	1.54833	1.25172	0.904342	1.1817	1.22152	0.264514	0.192539	0.0985221
															PIM1_T23I	-7.75971	0.356886	0.413733	0.992719		1.01695	0.93147	0.929168	0.909531	0.0361703	0.17159	0.17026	0.150083		PIM1_T23I		0.992707	0.999611	1.05852	1.01695	0.0361703	0.502295	0.277089
	anti phospho-p38														PIM1_S97N	-0.449187	-0.649874	22.7865	-0.635086		0.876614	0.910994	0.46137	0.908594	0.776701	0.748458	0.0575819	0.75077		PIM1_S97N	0.52773	0.424591		0.43179	0.46137	0.0575819	0.00378788	0.402122
		-tet	-tet	-tet	Mean	STDEV	+tet	+tet	+tet	+tet	Mean	STDEV			PIM1_Q127E	0.101263	-5.27568	0.614502	1.05099		1.22044	1.26874	1.20665	1.19767	0.116094	0.034394	0.108865	0.0978107		PIM1_Q127E	1.23219		1.27355	1.30047	1.26874	0.034394	0.00541563	0.164487
	WT		1	1				1.98975	0.602741	0.584018	1.05884	0.806251
	PIM1_WT	1	1	1			0.974157	1.09986	0.861615	1.03475	0.992596	0.101288
	PIM1_T23I	1	1	1			0.817523	0.850079	0.776474	1.0755	0.879894	0.133837
	PIM1_S97N	1	1	1			1.13975	0.882551	1.4422	0.649408	1.02848	0.340849

## Sheet: C- MAP2K3_RAW_Gene_Expr
Sample name	title	CEL file	source name	organism	characteristics: cell line	molecule	label	description	chip name or GEO platform id
SAMPLE 1	MAP2K3_A84T_0t_1_(Clariom_S_Human)	MAP2K3_A84T_0t_1_(Clariom_S_Human).CEL	Trex HEK293 cells	Homo sapiens	Mammalian immortilized cell line	total RNA	-	Gene expression data from Trex HEK293 cells transfected with pDest30_MAP2K3_A84T without Tetracycline.	Affy Clariom S Human, Platform GPL23159
SAMPLE 2	MAP2K3_A84T_0t_2_(Clariom_S_Human)	MAP2K3_A84T_0t_2_(Clariom_S_Human).CEL	Trex HEK293 cells	Homo sapiens	Mammalian immortilized cell line	total RNA	-	Gene expression data from Trex HEK293 cells transfected with pDest30_MAP2K3_A84T without Tetracycline.	Affy Clariom S Human, Platform GPL23159
SAMPLE 3	MAP2K3_A84T_0t_3_(Clariom_S_Human)	MAP2K3_A84T_0t_3_(Clariom_S_Human).CEL	Trex HEK293 cells	Homo sapiens	Mammalian immortilized cell line	total RNA	-	Gene expression data from Trex HEK293 cells transfected with pDest30_MAP2K3_A84T without Tetracycline.	Affy Clariom S Human, Platform GPL23159
SAMPLE 4	MAP2K3_A84T_0t__(Clariom_S_Human)	MAP2K3_A84T_0t_4_(Clariom_S_Human).CEL	Trex HEK293 cells	Homo sapiens	Mammalian immortilized cell line	total RNA	-	Gene expression data from Trex HEK293 cells transfected with pDest30_MAP2K3_A84T without Tetracycline.	Affy Clariom S Human, Platform GPL23159
SAMPLE 5	MAP2K3_A84T_1t_1_(Clariom_S_Human)	MAP2K3_A84T_1t_1_(Clariom_S_Human).CEL	Trex HEK293 cells	Homo sapiens	Mammalian immortilized cell line	total RNA	-	Gene expression data from Trex HEK293 cells transfected with pDest30_MAP2K3_A84T with 24h Tetracycline induction.	Affy Clariom S Human, Platform GPL23159
SAMPLE 6	MAP2K3_A84T_1t_2_(Clariom_S_Human)	MAP2K3_A84T_1t_2_(Clariom_S_Human).CEL	Trex HEK293 cells	Homo sapiens	Mammalian immortilized cell line	total RNA	-	Gene expression data from Trex HEK293 cells transfected with pDest30_MAP2K3_A84T with 24h Tetracycline induction.	Affy Clariom S Human, Platform GPL23159
SAMPLE 7	MAP2K3_A84T_1t_3_(Clariom_S_Human)	MAP2K3_A84T_1t_3_(Clariom_S_Human).CEL	Trex HEK293 cells	Homo sapiens	Mammalian immortilized cell line	total RNA	-	Gene expression data from Trex HEK293 cells transfected with pDest30_MAP2K3_A84T with 24h Tetracycline induction.	Affy Clariom S Human, Platform GPL23159
SAMPLE 8	MAP2K3_A84T_1t_4_(Clariom_S_Human)	MAP2K3_A84T_1t_4_(Clariom_S_Human).CEL	Trex HEK293 cells	Homo sapiens	Mammalian immortilized cell line	total RNA	-	Gene expression data from Trex HEK293 cells transfected with pDest30_MAP2K3_A84T with 24h Tetracycline induction.	Affy Clariom S Human, Platform GPL23159
SAMPLE 9	MAP2K3_WT_0t_1_(Clariom_S_Human)	MAP2K3_WT_0t_1_(Clariom_S_Human).CEL	Trex HEK293 cells	Homo sapiens	Mammalian immortilized cell line	total RNA	-	Gene expression data from Trex HEK293 cells transfected with pDest30_MAP2K3_WT without Tetracycline.	Affy Clariom S Human, Platform GPL23159
SAMPLE 10	MAP2K3_WT_0t_2_(Clariom_S_Human)	MAP2K3_WT_0t_2_(Clariom_S_Human).CEL	Trex HEK293 cells	Homo sapiens	Mammalian immortilized cell line	total RNA	-	Gene expression data from Trex HEK293 cells transfected with pDest30_MAP2K3_WT without Tetracycline.	Affy Clariom S Human, Platform GPL23159
SAMPLE 11	MAP2K3_WT_0t_3_(Clariom_S_Human)	MAP2K3_WT_0t_3_(Clariom_S_Human).CEL	Trex HEK293 cells	Homo sapiens	Mammalian immortilized cell line	total RNA	-	Gene expression data from Trex HEK293 cells transfected with pDest30_MAP2K3_WT without Tetracycline.	Affy Clariom S Human, Platform GPL23159
SAMPLE 12	MAP2K3_WT_0t_4_(Clariom_S_Human)	MAP2K3_WT_0t_4_(Clariom_S_Human).CEL	Trex HEK293 cells	Homo sapiens	Mammalian immortilized cell line	total RNA	-	Gene expression data from Trex HEK293 cells transfected with pDest30_MAP2K3_WT without Tetracycline.	Affy Clariom S Human, Platform GPL23159
SAMPLE 13	MAP2K3_WT_1t_1_(Clariom_S_Human)	MAP2K3_WT_1t_1_(Clariom_S_Human).CEL	Trex HEK293 cells	Homo sapiens	Mammalian immortilized cell line	total RNA	-	Gene expression data from Trex HEK293 cells transfected with pDest30_MAP2K3_WT with 24h Tetracycline induction.	Affy Clariom S Human, Platform GPL23159
SAMPLE 14	MAP2K3_WT_1t_2_(Clariom_S_Human)	MAP2K3_WT_1t_2_(Clariom_S_Human).CEL	Trex HEK293 cells	Homo sapiens	Mammalian immortilized cell line	total RNA	-	Gene expression data from Trex HEK293 cells transfected with pDest30_MAP2K3_WT with 24h Tetracycline induction.	Affy Clariom S Human, Platform GPL23159
SAMPLE 15	MAP2K3_WT_1t_3_(Clariom_S_Human)	MAP2K3_WT_1t_3_(Clariom_S_Human).CEL	Trex HEK293 cells	Homo sapiens	Mammalian immortilized cell line	total RNA	-	Gene expression data from Trex HEK293 cells transfected with pDest30_MAP2K3_WT with 24h Tetracycline induction.	Affy Clariom S Human, Platform GPL23159
SAMPLE 16	MAP2K3_WT_1t_4_(Clariom_S_Human)	MAP2K3_WT_1t_4_(Clariom_S_Human).CEL	Trex HEK293 cells	Homo sapiens	Mammalian immortilized cell line	total RNA	-	Gene expression data from Trex HEK293 cells transfected with pDest30_MAP2K3_WT with 24h Tetracycline induction.	Affy Clariom S Human, Platform GPL23159
ID_REF	SAMPLE 1	SAMPLE 2	SAMPLE 3	SAMPLE 4	SAMPLE 5	SAMPLE 6	SAMPLE 7	SAMPLE 8	SAMPLE 9	SAMPLE 10	SAMPLE 11	SAMPLE 12	SAMPLE 13	SAMPLE 14	SAMPLE 15	SAMPLE 16
23064070	10.4060210743985	10.3812165615349	10.6615693587623	10.5304674934037	11.3736948444147	11.3739251763398	11.6207971912154	11.4409880396574	10.4473727442212	10.4229549209729	10.5489948653449	10.5644883421054	10.4759657186211	10.2746770356716	10.684962056921	10.4490335735037
23064071	9.49996807418213	9.68650219411775	9.25404763001108	9.35108010506473	9.62205065133262	9.70934878552601	9.27575863332272	9.46510110756943	9.45314243519535	9.43521212310269	9.32105601152405	9.36762755442695	9.3061725958218	9.13143267301106	9.25872609497394	9.08524945717679
23064072	8.79202058187821	8.45981339519897	8.60123595269368	8.70579776587124	8.19959098919532	7.69399526621064	8.10115205585996	7.6496413845584	8.73031088718989	8.45686605289118	8.5157178653659	8.71769957621505	9.00883842516314	8.51961667424627	8.68290787644349	8.20090468426563
23064073	9.3957561447192	9.58753043064826	9.50142022119606	9.46349446597168	8.00412143039326	8.31230572620659	7.58426578244801	8.17070598539591	9.4191741863254	9.60612152172263	9.53074141249164	9.27665252552756	9.20457415622849	9.55750007354791	9.48343356548921	9.51141587455244
23064074	7.99081115729973	7.88023667112126	8.03740749124625	7.96508377346678	8.14130757725831	7.98567174421171	8.47356643846848	8.32306525437787	8.20690355764072	7.77193006336292	7.93724375451756	8.09302162848512	8.0219185866145	7.89076866507281	7.96181566950261	8.07131357434061
23064075	10.5798924451554	10.5283797435025	10.1332948383816	10.2585472088902	10.7380563924338	10.6428062320669	10.3114765749314	10.4988321667836	10.5614134880513	10.4585944494496	10.3935629420919	10.2834878373964	10.5539979209042	10.405261092321	10.2463798013572	10.3960327269949
23064076	9.29663943301905	9.15615513223029	9.10882346860668	8.89545001193022	9.86164020659565	9.57081980681185	9.7014373711457	9.78265563886156	9.29380754609751	8.90705520480975	9.08362086927932	8.82891975234469	8.87800988989221	9.10577472040508	9.06515305999789	8.99150985649412
23064077	10.7275082434906	11.0030776097049	10.7304935754419	10.7389751140641	10.9308612548974	10.851122729597	10.6335024942814	11.0427915367583	10.7880671090552	10.9081595785643	10.8746855072721	10.8962916077169	10.9503068490554	10.9107714425491	10.6418269340463	10.8560065819632
23064078	11.0724092393911	10.7185134969046	10.8016880253596	10.6529748396328	11.2020996974767	10.6881239485663	11.0508487087444	10.8750898851823	11.0726274030704	10.7400334230211	10.8020761321808	10.7887660808734	10.8374581916133	10.6616953281298	10.878032377513	10.7150196183906
23064079	6.78154361155816	6.99187409401891	7.55917465192573	7.00195305325589	7.34680846944958	7.10741100788886	7.06409132218605	7.25211375708571	7.10960836853743	7.32497463101131	7.14136651026457	7.45569550125318	7.19810721893844	7.62169140479917	7.61732197675592	6.82721682125201
23064080	4.75260966857287	4.55524987166061	4.62664763588352	4.63330537616523	5.07145678654911	4.73622949472659	5.15503043507932	5.13599779367704	4.82390272938284	4.85125827958737	4.42880715429685	5.01304217305228	4.53222611888724	4.97980937305471	4.70437758111826	4.94947218145836
23064081	5.42413052735899	5.65389411290162	5.83870165875582	5.69116957521391	5.1141312830894	5.42805035518255	5.41120097548053	5.1500995179602	5.47028747973062	6.07064709440808	5.40551533887504	5.5555942159413	5.83004388686209	5.49535898436153	5.19123935598648	5.63987224080432
23064083	6.46823776763398	6.60087550569025	6.95169266088673	6.87776675277394	7.009198846477	7.02133401349012	6.79934686762369	6.87659926032315	6.69942931315703	6.87435777287542	7.14456497482339	6.69443790285623	6.61353664292053	7.15337355765467	6.9413588945495	6.80921321348807
23064084	4.09843535661622	4.38808155111692	4.38994091051835	4.20083312150638	4.34836854762977	4.22158504332945	4.30352394205507	3.89338163208938	4.36962151444797	3.97655711979666	4.38970168449419	4.33981789290743	4.05243235783664	4.69367818289269	3.98917759859713	3.91766668692641
23064085	5.47630387332875	5.28169394720159	5.78037306920889	5.70633518793868	5.8270253190916	5.77577125674739	6.19172254013146	5.85507414467141	5.5167087741211	5.37009540969646	5.77046551520082	6.10879247880175	5.56017895504526	5.54261526611231	5.87325835983017	5.69408874097957
23064086	5.25872343130421	5.10636358391216	5.17914534587932	5.17535252358611	5.04680162800873	4.98308006577016	5.08187567115559	4.92417307346136	4.89647155886108	5.6873435598844	5.12356990270628	4.75419050498764	5.67582676381967	5.09689864178029	4.95463681494325	5.35621017514889
23064087	7.09121035106691	7.12364468163311	7.05421109713879	7.50758088560298	7.64335314615771	7.5218922095109	7.65078790066466	7.48674840423889	7.35351062871637	7.37382462361118	7.26514904706564	7.36425856077942	7.50174378775622	7.02403489011374	7.10530761330327	6.99855805650981
23064088	7.20500815758635	7.57993691950568	7.20965192775385	7.56755645332164	8.09684817081429	7.94842112277635	7.75790109887515	7.99564352955754	7.31038934264974	7.57119356361909	7.46905929378531	7.62511601617389	7.57532814202729	7.37330452551017	7.40413955578118	7.55938714355051
23064089	4.09658432043098	4.25937243554193	4.18412348339502	4.14877441974691	3.9396007878337	3.84355807015443	3.82217486788826	4.20838549528703	4.24981415514251	4.15360483388529	3.88007379964851	3.86285238694011	4.2174570060009	4.45892914406338	4.03253492353375	4.32766587869912
23064090	8.31276477534106	8.61332527495631	8.46860319668396	8.51713186470857	8.47777291567988	8.37568353436161	8.86873584760135	8.54843975234234	8.37992706803748	8.55711121715499	8.60745079476477	8.67352117518786	8.71606611470808	8.56582159691761	8.4701258284268	8.64618434276734
23064091	6.78002812649143	6.97073967544019	6.53081350144917	6.94779408370675	7.53139396220103	7.15001077316487	7.54067451437327	7.4073941326468	6.77697103036164	6.70761835436143	6.79822124999714	6.73409978159224	6.99877596449973	7.03386291348589	6.65427652991674	6.96821630970368
23064092	9.67258233827724	9.5964024392391	9.68143141379245	9.66777688836847	9.95987725828763	10.0349758762499	10.3147182164221	9.94294859257017	9.66619707625211	9.57644385857524	9.69383565677622	9.71600228547999	9.78335559960173	9.53652711831438	9.79969225023181	9.52978284139294
23064093	8.5641080571544	8.3838149454277	8.29042441643633	8.13142346239511	8.71661570059449	8.46194018113044	8.95383843080835	8.64749968964971	8.46007782011223	8.48206587174232	8.3446941540311	8.5922125990866	8.30670722880035	8.16789585554679	8.49586587695246	8.30270472191097
23064094	8.63064952757037	8.28088380483326	8.43511501095994	8.32432136013157	8.58855488937421	8.46822221976742	9.41761895944688	8.77835298269518	8.179958998817	8.35219936148799	8.44033584297539	8.76068913019679	8.54006878976776	8.44553731616561	8.38209198974438	8.52320036993442
23064095	6.17258126468638	6.6619441539387	6.49510408529978	6.46668259862479	6.72523721046313	6.47541597113435	6.9375847448733	6.40695147469693	6.65378617808376	6.06233700115865	6.4850347623849	6.51637595305965	6.74130888088338	5.9993251703079	6.46282405757995	6.22382954985975
23064096	6.50064228268844	7.10816457931674	7.30104424101293	6.73172013403344	7.25751803044958	7.17477622844553	7.23618873047499	6.93691492637552	6.59165268131761	6.75254634478288	7.02676083321181	7.00629433148155	7.01256702928517	6.79964543231461	7.18257530948427	7.16404527684578
23064097	8.8300424522666	8.77259545619735	9.06213567447888	8.64801570291452	9.05401555489089	9.11184100557568	9.26124351642062	9.24598880626361	8.73890855123523	8.74161503921708	8.93538956954421	8.69172220399387	8.84663178099081	8.698500755044	9.0223684431215	8.92983104478788
23064098	9.07449019981786	8.9004769400692	9.08629033820992	9.17784670094714	8.92581747576908	8.88055871173134	8.94201415670882	8.94088201763278	8.9323680213415	8.69600632536207	8.87782420989653	8.90287691222847	8.92970801613112	8.91444640803726	8.7974947574921	9.00591795038966
23064099	10.3649404613861	10.2813946807038	10.8803766112224	10.526116867383	10.603420259758	10.5631059906949	10.8622008661988	10.4938104503544	10.4055744545634	10.275295951196	10.5927224658604	10.4986754194442	10.3659640621212	10.3670931480337	10.5749657748916	10.4581488008416
23064100	10.065857191405	9.75266682854308	10.0659866086529	10.2228174263746	10.6891414032124	10.503362810087	10.6284571797983	10.9654348646369	9.96175172911904	9.81228524756146	10.050502378425	10.1169782641692	10.0207903162348	10.0008857080962	10.0770034174365	10.1451332966359
23064101	10.7151989779824	10.5897105267249	10.6987605110974	10.6282114360916	10.0622998538127	10.4258316143639	10.2694351639316	10.3121326597447	10.7642755789423	10.7683409998791	10.7848808820183	11.0393878385911	11.0080210841141	10.7785891130727	10.7250993493474	10.8799885050985
23064102	4.69334713447512	4.89443701795019	5.23056092119451	4.46511959964034	4.64084426615753	5.12677756442415	5.62315904859087	4.99235102058029	4.72022927667137	4.59813269532347	5.05621158746102	5.07885664556737	5.12965173780906	5.11508896448963	5.00564688990704	4.74491579954549
23064103	6.558047685437	6.41030660479318	6.53989197459746	6.33406815928251	6.72500664429151	6.77458912227639	6.22518938599614	6.25186159162059	6.30406721477166	6.68029819056055	6.20069760193241	6.46993395380254	6.48477653344961	6.30869770371648	6.49914703004615	6.42736346810008
23064104	7.48061287266577	7.60177677054045	7.44596509106967	7.26953636218349	7.59299247632853	7.59701989002404	7.71799746084391	7.79538481945373	7.20652799108332	7.38118829569116	7.02146979074638	7.47086390361205	7.39568283428798	7.36444772954767	7.21017494475808	7.46842432984341
23064105	5.50968633950362	5.76215241901841	6.03841075795123	5.66083568098813	6.11561060538228	6.08882646069656	6.37927855897968	6.45022343140213	6.06687810827013	5.55066044386206	6.2137652512986	6.31160098567119	6.49975574894552	5.99340300689931	6.02742197616363	5.59245639026438
23064106	4.68314591663268	4.84666980835985	4.75440755412896	5.13262765555422	5.15103781573353	4.83685358704759	5.40282092770488	4.58541133415769	4.3563120752495	5.18267319883053	4.58118925957806	4.76588015698305	5.0113938200488	5.14371403916684	5.1760361080199	4.69010519540782
23064107	5.31042874735512	4.70085439776567	5.32087418939831	4.75253164226934	5.2234774184771	5.39636943112422	5.45145325761403	4.98671328816895	5.11833639937119	5.08610918896751	5.03359722451444	4.90372371331077	5.06793271731599	5.00208065918299	5.42333235241089	5.01869381181051
23064108	6.78740760433219	6.67051492466156	6.67047841793584	6.44284954626504	6.74207922727386	7.06868589865973	7.27364363594523	6.69120377583368	6.42020826167401	6.70083236776532	6.77903425486637	6.81912791889986	7.1333492620628	6.33514136583647	6.62177806025915	6.48519935653772
23064109	5.78362310271987	5.23732639498025	5.41252678369395	5.39393299251193	6.05384636522126	6.37705394220661	6.59848639427031	5.63031542379633	5.47366654975569	5.80572255843485	5.96045616890282	5.62731380756358	5.79204840363219	5.49510601499756	5.34254496794436	5.68685783978009
23064110	6.82138056671298	6.58027145940677	7.00563029680138	6.88315139582959	6.97032835715863	7.15341277950875	6.93147704158202	7.47799477762107	7.02553616673752	6.56815955602961	7.04747866416901	6.49863335690795	6.54634715257287	7.0439474480324	6.53861926475832	7.17711453285001
23064111	4.09843535661622	4.38808155111692	4.38994091051835	4.20083312150638	4.34836854762977	4.22158504332945	4.30352394205507	3.89338163208938	4.36962151444797	3.97655711979666	4.38970168449419	4.33981789290743	4.05243235783664	4.69367818289269	3.98917759859713	3.91766668692641
23064112	5.47630387332875	5.28169394720159	5.78037306920889	5.70633518793868	5.8270253190916	5.77577125674739	6.19172254013146	5.85507414467141	5.5167087741211	5.37009540969646	5.77046551520082	6.10879247880175	5.56017895504526	5.54261526611231	5.87325835983017	5.69408874097957
23064113	5.25872343130421	5.10636358391216	5.17914534587932	5.17535252358611	5.04680162800873	4.98308006577016	5.08187567115559	4.92417307346136	4.89647155886108	5.6873435598844	5.12356990270628	4.75419050498764	5.67582676381967	5.09689864178029	4.95463681494325	5.35621017514889
23064114	7.0357236738673	7.17448913090694	7.12023485294532	7.44744074409364	7.63438421174946	7.55392306476887	7.69831057382528	7.55841054861222	7.45363959412015	7.42272366309541	7.31902341468963	7.40896924106695	7.55347127313878	7.08907383726434	7.21487630685479	6.93130425978815
23064115	7.3705156210402	7.5271253099979	7.14967227596963	7.64139683571478	8.21632473889689	8.05310851933726	7.81197594406212	7.92463092712609	7.42257309628231	7.59562616743779	7.49377396526756	7.41521275486659	7.48131634237255	7.38458993927741	7.37656194030326	7.67214591060066
23064116	3.98804160155476	4.08691067136867	3.96532725586366	4.04929276537485	3.8768366849263	3.83295546130373	3.78904248005697	4.09592963551101	4.08491544068958	3.88964780677547	3.79580688866477	3.65783149267187	4.0706156583429	4.39693896031855	4.23799715165645	4.23939390004854
23064117	6.48856353475782	6.4022736765835	5.93645182706815	5.95006314318956	6.16237079883834	6.02008579491826	5.91320406768102	6.12544159187398	5.86549675720691	5.9868976175686	5.89561490895377	6.0343204170115	6.23578618747504	6.57276630905137	6.28277255053065	6.23004313557483
23064118	7.47518501923453	7.23717846516496	7.5702121822658	7.399808226965	7.34557621589261	7.50392931800675	7.79057712752693	7.71363807794089	7.44257276221161	7.14077807607743	7.78562294738268	7.6331464929836	7.36154406205308	7.29784776792184	7.5154600899052	7.52327973051484
23064119	5.229026819415	6.03275638107677	5.50158995661227	5.52065813505526	6.02331326462894	5.61814989330999	5.79274038781753	5.71078853656539	5.41014177896082	5.54675285186237	5.22377073548614	5.61179676008846	5.17556309607863	5.422553715252	5.24707162004305	5.31136444570339
23064120	8.35107340357619	8.54053548278752	8.37361648583617	8.33805405127715	8.99098672623419	8.70798503672983	8.6824622857482	8.85105181376172	8.51604744515744	8.59082584672019	8.36212605428573	8.22217187764379	8.36772984119899	8.70980205228673	8.34114517360686	8.25269290466272
23064121	8.87530513570803	8.54910820795968	8.45860558711508	8.31562657879466	8.96822393430206	8.76619586543849	8.8414245258675	8.72267316339313	8.5553338549762	8.50033164772648	8.5873885338933	8.46715014761814	8.69138777431917	8.3716924167768	8.42595822712414	8.56971896909056
23064920	4.15841815717869	4.13076783814411	4.51516855278013	4.42195650697386	4.57818992392174	4.03056031889937	4.27435578346088	4.26572334420575	4.10983457887804	4.14150536419145	4.15979212799082	4.41992678375379	4.08753064831775	3.85898436129261	4.18293771316043	4.28506953313431
23064921	4.60103802787957	4.44041456024246	4.00025404227164	4.51787056697792	4.08387196165658	4.4930383620754	4.24930427580544	4.66789535878084	4.6690009200341	4.5963437073426	4.11833199623868	4.22356544601996	4.29865513086061	4.78821441746794	4.34341927873769	4.34720890910856
23064922	3.79247325613251	3.87958277223281	3.89928769434073	3.8233067848611	4.06811232367165	3.78685356249206	3.71407062321995	3.9008626024057	3.9793324690906	3.99490154850563	3.90977658808665	4.05640279230606	3.7877385885288	3.94498507358996	3.90989428764143	3.9719680933147
23064923	3.72635903104552	3.82696075275514	3.78552526004847	3.93113554033139	3.81443691495522	3.85274544499931	3.53855402268129	3.86739138452431	3.83102028171246	3.77923220773676	3.66037477429785	3.80325837060052	3.68148807924845	3.66548129794929	3.95289697459223	3.62903744481219
23064924	4.32936596159471	4.43131182782224	4.26775653940261	4.10802002834429	4.51847419596342	4.07385141027145	4.31276471819161	4.25423561598469	4.56335261510733	4.58043539712156	4.25381642934011	4.34761414152894	4.63295542493073	4.46826391299952	4.64896105382588	4.26343067216971
23064925	4.50085727965836	4.51766830583506	4.30618069128858	4.38812152547431	5.16225144586327	4.52897621117557	5.09598030900578	4.55762856591516	4.18177729165753	4.50149854553368	4.33659746885783	4.80722622633113	4.5602759052741	4.43816190173778	4.36219758251015	4.45871086661724
23064926	4.09848065849639	3.9705856574544	4.29107836731287	4.4260959329194	4.24838332291923	4.36519387253108	4.53752313811194	4.36498566333443	4.42374700938392	4.39480034706293	4.36429463031238	4.42088821771397	4.52620730507687	4.44833495829996	4.53909914211171	4.61086320891111
23064927	3.53040721550736	3.62484047040695	3.70497687373879	3.94833369453349	3.52685636493655	3.58521387720515	3.35857729363147	3.6846907117141	3.60582610916522	3.76387477705376	3.75845372817362	3.25366126432176	3.63016890342507	3.79983391168355	3.73280147893903	3.64506969674509
23064928	3.8920733773445	4.02975528502182	4.0080026342977	4.13347856737303	3.82875754187312	4.06212233479801	4.21378352044935	4.16642638591409	4.06921369712408	4.25944829560434	3.91646647856657	4.37143411769483	4.03071522377955	4.3277521229635	4.02760808238558	4.02699576737767
23064929	4.52660755289457	4.72503397301538	4.61866025230782	4.6363179702851	4.95513230986949	4.48795584311135	4.4737560606322	4.4367735881609	4.79428982455955	4.7345052344202	4.26534748494859	4.11052570115318	4.55921137691869	4.40729976080517	4.09242147615598	4.4861922527787
23064930	7.56214818405907	7.40500162566885	7.63707742497555	7.29468462565527	7.70783980194694	8.05513251586704	8.32593903693361	7.59478486350145	7.58420129522629	7.26742502186169	7.39054739700981	7.73031088612237	7.44330867478223	7.36152416099599	7.24143236381358	7.69587425807151
23064931	7.97651517248119	7.78683789089508	7.88700492847777	7.63715296855309	7.87869909482527	8.19729363232619	8.30702296428723	7.97177368996237	7.65039377704281	7.5749150191419	7.83922419828182	8.0067084318097	7.62137586705384	7.64420812274403	7.46552033000375	7.66447377195276
23064932	6.66573881676057	6.31051487408346	6.60644595817652	6.57032528438215	6.46222910262152	6.27590503597794	6.30761715676054	6.55302838574002	6.30654573310563	6.70595375513841	6.63094902773076	6.66930043516272	6.51505759410943	6.15313593361567	6.20971187625139	6.02195923164733
23064933	4.42641161264188	4.08665828437283	4.10796658456168	4.58124990126799	4.15252556020949	3.77572093988941	4.60395904340687	3.81641267932015	4.08599069773324	4.54030412813715	4.46768930302262	4.1721901721205	4.00920205384304	4.02389643766027	4.5953999857328	4.74125784551787
23064936	3.7692383454852	4.10257240666613	4.01674938201198	4.32498049505197	4.18380734940154	4.17681413393783	4.05716239729221	3.84239695049951	3.87565719106206	3.92478791630108	4.15752757968832	4.19699560412206	4.00096182813071	4.20433660517787	3.85670711796793	4.0152815835339
23064937	4.12761589905465	4.55834839246226	3.81596120672084	4.171787381653	4.16383075858704	4.12378355135883	4.35671850628341	3.79463096419664	4.2404484491862	4.25641535920929	4.00973589830244	4.48011735822107	4.1603715738418	4.36477832543589	4.1095180610102	4.36842419016043
23064938	3.72560170859575	3.61071505351854	3.40495301182762	3.42710299788962	3.63718159289888	3.54418400081914	3.54833260273477	3.53579871813557	3.55522738057139	3.49844408061426	3.57247797457785	3.55703258710012	3.60586871958386	3.75150987528132	3.74738346577179	3.50991450841245
23064939	3.86356413408589	3.57130038277755	3.5394075157244	4.06600766063548	3.98290208276331	3.5289463383832	3.99683482217673	3.90972437918341	3.69741921634794	3.61941484050946	3.62658046707326	3.7882321781559	3.92686867528565	3.93233179928025	3.63978195700784	3.82473104571303
23064940	5.88076916652576	6.02434219881548	5.82825255201931	5.88699702223844	5.75390622079121	6.23036584588569	6.29888095890043	5.77246100520387	5.49907916018968	6.01908251538475	5.91094334683196	6.17334513407152	5.88887128150504	5.93764582289383	6.16199754094621	5.72383820283767
23064941	8.56119231898301	8.5504333780418	8.83440610698566	8.86982370644835	8.84712446010154	8.76226886842846	8.79021314836787	8.94005555224408	8.5349830968339	8.84994225859609	8.94241242906056	8.90288193554513	8.84912574844653	8.33402798849985	8.71037434323112	8.56039283764858
23064942	9.75477648093572	9.49913197394397	9.65944232412506	9.47125670202128	10.0181573886078	9.89956785314553	10.1064399811116	10.0066649817977	9.57190024591525	9.44531405619896	9.64287628821267	9.70772071430975	9.76094771436342	9.37270261761593	9.67728996535013	9.4336351171082
23064943	9.05708616779667	8.93193386877013	9.12463610718303	9.0975816251708	9.62492627361509	9.51282440192794	9.67160702932186	9.58660614264919	9.0657652813211	9.01431889766122	9.2313493966842	9.19169477994676	8.82672336063998	9.04166381887634	9.31465881240983	9.12431481310434
23064944	7.09314514093729	7.27713194151385	7.14947881644533	7.42386475899022	7.81464137290812	7.56113795463914	7.72709759047529	7.4355652974776	7.04919660245231	7.49234914790345	7.25201484574569	6.98420715838577	7.28565143791027	7.24067443811564	7.44260891927418	7.16155977469348
23064945	9.66200626444224	9.65927533282885	9.90839809924456	9.64023593429385	10.2072154282259	10.2329106385502	10.6649903795387	10.2244563960178	9.74926930328199	9.79049591866015	9.90859493951239	9.91587026747728	9.9745701345854	9.59522727826615	9.92284073003391	9.66328725106646
23064946	8.01663245483608	8.00674914624943	8.08735415554642	8.10038244536017	8.29225702275238	7.88286595441134	8.05899493317158	8.26418993479539	8.25356265723191	7.82378793381989	8.18177662591496	8.27308654382194	8.1959571255784	8.10210630628827	7.87966132876101	8.0880115194063
23064947	6.48249555226127	6.80189808069422	6.84305891685444	6.86662468912671	6.97542781915656	6.59732792050252	7.29204755727242	6.56504877788251	7.10937905420488	6.26944900927098	6.92739784981532	6.92166819455617	6.93468727059741	7.22739477652282	7.03159946101683	6.95019631441563
23064948	8.20887101831531	7.99163781992302	8.10140188421455	7.93706143006963	7.8887817510247	7.98455006295794	8.21473338737607	8.12867214589046	7.68486328940081	8.01369402003452	7.91751699026074	8.06367774441629	7.98602071035693	7.52035572953558	8.35401451564445	7.90717684321954
23064949	6.37861782566591	6.28486087806278	6.34755620110498	5.73161107038986	6.40352753855368	6.56730160026028	6.51777590865763	6.80669329496274	6.28978085769647	6.17675623720113	6.63648807992667	6.69009993558102	6.64990276318838	6.31742017310109	6.11371702521495	6.16272895261843
23064950	8.34453746123253	8.10969315630379	8.9756584983112	8.40894637401006	8.00147537021393	8.10992372941003	8.43399395328244	8.20747089835155	8.12679032133348	8.46758755670226	8.66317048953438	8.3356158966881	8.30559202773934	8.13304837007507	8.66484254027593	8.43979811560839
23064951	9.64703077901236	9.63293686673523	9.39675582950686	9.45556963206433	9.6426130234291	9.58807922840918	9.25942861552063	9.43268876642335	9.65548927464297	9.60695732732139	9.48912274144729	9.25363969523953	9.72334732610364	9.59717960977853	9.49068919190699	9.48739163071643
23064952	9.69368568220335	9.55581494076022	9.81754957143003	9.76717522417331	8.95948282179608	9.18813783613172	9.25799241114613	9.16057575140276	9.61545861747934	9.7490831814825	9.85818996305354	9.54205847431704	9.42859116025534	9.71544619667048	9.6544980543523	9.6916950805083
23064953	10.7609639814459	10.6316120393778	10.3323305080224	10.2710638442901	10.652630443483	10.5723288104215	10.1763414586731	10.2942132095329	10.7703956206677	10.6543911534454	10.4647505252313	10.4246454520786	10.7907485946982	10.6016035562388	10.4830192053367	10.4722098228654
23064954	9.191090736825	9.35231586169952	9.1596933459532	9.12635514405976	9.32691639974067	9.48017779613062	9.80908273302867	9.58708871431398	8.98346081806315	8.92048680480688	9.2157001124416	9.19536818288354	9.4288327064389	9.01209138072272	9.41038798896544	9.17686012536651
23064955	8.8120158969942	8.69030566451802	8.67546402420575	8.53350782209381	8.385319499396	8.55847726954933	8.81735306722838	8.4313335582139	8.60225161196211	8.59662425785396	8.60250837619022	8.90928334025518	8.50995399929828	8.65011764828751	8.59498366826686	8.53458340141409
23064956	9.98237093536292	9.86248333306546	9.9256807770739	10.0200520331824	10.4075979995124	10.6391207559997	10.2967844789687	10.5377052322814	10.0686415808075	9.90407828022296	9.82094122060789	9.65555757737416	9.9977325934297	9.7189232170446	9.91567763563507	9.79219988431534
23064957	7.19282586556232	7.39736903190118	7.09979490648554	6.99553825469299	7.46541984125131	7.29783236159912	7.8224327235796	7.28786863428858	6.91960754513991	7.10604039318009	7.24396198412566	7.14941863124662	7.19283036661085	6.95916126105802	6.84660319198426	7.13593653928068
23064958	9.40114498099404	9.82217242121009	9.49957948037964	9.66983153752088	9.13088281239859	9.23940579368255	9.07077585597244	9.27320545905406	9.43587137049327	9.79745814499684	9.52882868130809	9.45592166076763	9.20919758388098	9.58997953653471	9.70155603741964	9.69307370893493
23064959	9.49392807629373	9.71096093511991	9.2545388848594	9.36445736309827	9.29475451553866	9.33032500620216	9.5564569761887	9.39464697769233	9.36847134276321	9.57811787388937	9.40604711961422	9.43900942316373	9.56337387276264	9.57105455775928	9.53786239845314	9.58633641622518
23064960	8.66537986888066	8.60232249906856	8.57515749317342	8.53514987281388	8.58789709768697	8.77477230718929	9.04018080865814	8.66478363510322	8.49120835868397	8.65192106572836	8.48919660279607	8.94768436302015	8.44015772157168	8.57964221264506	8.56129664849801	8.25412015224288
23064961	7.07998467622659	7.03017717392654	7.79937876801302	7.47049306764268	7.31773650278801	7.11491767075583	7.76502304432535	7.45447585799542	7.1183976879693	7.37329198383548	7.437651796556	7.24726086688937	7.12427240486647	7.19692135530727	7.45308665169689	7.27003447561216
23064962	8.57978913703891	8.34227358241201	8.67408428441039	8.60599840310315	8.96564919115574	8.70807473257624	8.9282176790111	9.18625812876279	8.50594413968023	8.61706131665703	8.62638042241563	8.81943731836587	8.57795212359964	8.53984617224972	8.58926035971377	8.47651519122237
23064963	7.68962071847566	7.68240524028262	7.79694110087254	7.56243689247911	8.10229342434011	7.70204841354689	8.24322953050767	8.01171571880622	7.93690080330615	7.75144361476737	7.46189390241447	7.528928012128	7.78375723299703	7.72818056098297	7.73985429638708	7.79972447227252
23064964	9.7914131944735	10.0035635652573	10.3282525669147	10.2655475895895	9.9664707594358	10.0404593135578	10.3729460644166	10.1518248252552	9.89806657117758	9.94753381795006	10.0389228934481	10.1504947895151	9.91616184626655	10.0358060607915	10.1698100499408	10.1352229602939
23064965	9.34926074882259	9.36653477555287	9.33257117584757	9.05518283050085	9.73881472917147	9.56555294099479	9.26102177983719	9.58391335866365	9.29057440207841	9.25610338237894	9.33124845594584	9.18656794323405	9.02643299165216	9.16634757249497	9.15116978625728	9.4498740879428
23064966	6.66719514070293	6.67242319238428	6.7925111112546	6.78654208660168	6.99598494855492	7.01839716268544	7.06072429640083	6.82972732810313	6.66030555646355	6.35752593974219	6.62663545224614	6.86339701026592	6.75565051834357	6.68719729576037	6.47354929820143	6.89624370155198
23064967	8.56119231898301	8.5504333780418	8.83440610698566	8.86982370644835	8.84712446010154	8.76226886842846	8.79021314836787	8.94005555224408	8.5349830968339	8.84994225859609	8.94241242906056	8.90288193554513	8.84912574844653	8.33402798849985	8.71037434323112	8.56039283764858
23064968	10.641452432841	10.540660964808	10.8309920610907	10.472383285022	10.8491891162975	10.8726575551612	11.2203747397034	11.045076530023	10.3505500090932	10.4333059507327	10.5839587708042	10.6641229381834	10.5950590515981	10.473930328724	10.5148196137521	10.3610225430078
23064969	6.69351849380824	7.1256876170263	7.13762166691498	6.6061456428942	7.04194218183661	7.1556465607083	7.52243550669615	6.62007050174427	6.82368327190735	6.79533611814359	6.83642992435874	6.93956489858564	7.1742725449867	7.16965461317315	6.62907474594638	6.89876336476567
23064970	9.0880089753012	9.03787305145532	9.22452157366287	9.11498986886267	9.54319239709428	9.39258521003185	9.56771549662247	9.51766809154403	9.10962360240098	9.07637596514218	9.24645560972673	9.19881175430622	8.79876976738816	9.13346196500205	9.45590992794143	9.14395412628071
23064971	6.93991310402194	7.4863770559669	7.46873980459715	7.39620175110032	7.73414973818446	7.77989085866209	8.30266876722931	8.08554089643336	7.433998124135	7.21707870171047	7.5853831984055	7.56668570665845	7.50099354410108	6.91281710894418	7.3764813333676	7.45268833320604
23064972	7.26143707409056	6.83143317982704	7.10154507087439	6.94779921408376	6.99449857271097	7.28771406700879	7.24487988432051	6.84196262444622	6.85700482378726	6.91434203871661	6.59465717633912	6.4167371277628	7.32010475598476	6.84276730921379	6.9371554303362	6.86441261008582
23064973	6.95093397236811	7.13722198806775	7.00726764787616	7.22277667424354	7.66860414145638	7.13856032747063	7.60868804569409	7.26873305978548	7.20841858436297	7.34487385319383	7.0217748352045	7.05819131671905	7.14906207694917	7.21202443488119	7.12186977540528	6.9114711724728
23064974	7.74467779181416	7.59791026041898	7.71025019383765	7.74886441495883	7.78561910114363	7.77331725724505	8.42248107315939	7.92071813991697	7.31952355422394	7.65451117647564	7.82879008668841	7.96141363906017	7.82246237065818	7.62775114747422	7.39732591186624	7.61961838567478
23064975	9.01574575070882	8.83718954177825	9.56821636818846	9.06442566934804	9.2081771729805	9.64946064243102	9.87779940188442	9.38031839706543	9.16911051276846	9.19135011924392	9.29998781752226	9.37321907601199	9.3309209696461	8.83088055033085	9.08791011675484	9.06393360784685
23064976	9.34926074882259	9.36653477555287	9.33257117584757	9.05518283050085	9.73881472917147	9.56555294099479	9.26102177983719	9.58391335866365	9.29057440207841	9.25610338237894	9.33124845594584	9.18656794323405	9.02643299165216	9.16634757249497	9.15116978625728	9.4498740879428
23064977	6.36250860358872	5.96718773363003	6.35927488545612	6.4101768513728	6.51809542624618	6.48681915045461	7.49686426169928	6.73650513610658	6.12244479671451	6.49672204898765	5.72018385480628	6.50502959388836	6.27269981312104	5.94152992661933	6.3884362709293	6.30445496614588
23064978	6.52469021968695	6.63066730268769	6.71492576177602	6.75112886241171	7.13288744584513	7.01851052045625	7.40960060935921	6.95243968857956	6.62710464558883	6.41549574489869	6.76294319336589	6.98526845552303	6.71229375357058	6.60971848362325	6.50949488843403	6.8160656315447
23066329	4.26950214108267	4.47493867872705	4.72545522312418	4.66996685524526	4.60248867035537	5.09985942748147	4.49192155020874	4.51223501568918	4.39204583913202	4.35104360659023	4.19930650352267	4.53095721697868	4.53256784109076	4.54332297501656	4.36626553849843	4.64904586259446
23066330	4.19470659094318	4.45006591988186	4.09053041791892	4.4288044072975	4.34788039660973	3.85816048455649	4.28563119620069	4.18069688866964	4.07099637747221	4.12990910148897	4.32928102966776	4.37236029100132	4.13568616817867	4.51227651893103	4.09335721190739	4.40457336297676
23066331	8.83377184944846	8.81350268247411	8.68720602828097	8.85626862902087	7.77699157782259	7.58434976308525	7.95175234421598	7.75380737603108	8.70366502339268	8.58604086300613	8.78656144607388	8.98351840565434	8.64726390845761	8.89652377231625	8.69420685605657	8.58944252548478
23066332	4.05564968328992	3.75093895238717	3.74569407504229	3.8851807722573	4.1056852192971	3.86693456329839	3.55720570318936	3.99037426143721	4.43122069226759	4.15143806817672	3.87240708020093	3.8695591470205	3.54867049585052	4.24925389130474	3.82976814838393	3.89922263033096
23066333	4.15010341769828	4.21912969883053	4.39358581929682	4.39327701550214	4.57497911127693	3.76962235738575	4.25502571905936	3.8880740806811	4.33099741083817	4.1913319860082	4.30953330024575	4.6601886326042	4.25843645142511	4.16394357955113	4.64224549104664	4.30343653368412
23066334	4.4332267351435	4.60949628777157	4.74017514667378	4.29029241434604	4.36702393187675	4.75475114422896	5.48953516540653	4.09237331174962	4.41224630614828	4.7709749454973	4.22107047179737	4.71270454111106	4.70843378197178	4.60172529433225	4.15701935672917	4.56678662637975
23066335	4.11565179035738	3.90524554232088	3.90269910765653	3.82456055683535	3.78705858170706	3.78494163751165	3.8050396595691	3.89512417066211	3.87532152154399	4.28225879749103	4.05263217192725	3.94783483974912	4.4578567791044	3.85826393022489	4.05078702458597	4.15080863556602
23066336	4.56938709705724	4.56453097384363	4.7127622854394	5.01054637959906	4.87285021030816	4.97270822648845	5.05108701538577	5.01477325753229	4.60324647240146	4.95826845911234	5.34842317321807	4.87116345523694	5.1537326008694	5.07158468019057	4.93979963642285	5.06705603478124
23066337	6.90011078034734	6.52029965051623	6.2388807823355	6.67702359312042	6.1762052356254	5.81993510511741	6.43095691498618	6.20990921693808	6.87971088492836	6.33712305910737	6.13539975699541	6.43668240300018	6.93691641336179	6.21184799222893	6.42568703011694	6.4986922875969
23066338	7.89661515936597	7.65982164373928	7.96509260730501	7.88269672561509	8.26269769743667	8.15253538584257	9.03305258662637	8.36333464567354	7.61027728597475	7.8483703730122	7.96335294502757	8.2945264542892	8.11145309893731	7.82720100680521	7.79205781815154	7.96658170570376
23066339	6.0818464163468	6.154027416061	6.32934799036089	6.40485484085487	6.55932779342436	6.25756700514315	5.91470065279574	6.37259131032546	6.09245637060824	6.33180745256312	6.00760669860678	6.18594772310868	6.10059964555088	5.80790892358042	5.90735525850149	6.04166987791474
23066340	8.4395279284952	8.74921969571731	8.43500888972032	8.53726709403233	8.33393955815285	8.30594154258246	8.36161814019511	8.27687931302402	8.4455665676106	8.78436363464477	8.51771761673778	8.6452391940829	8.41406304146967	8.57979299064939	8.39289924630357	8.41391900792898
23066341	3.78724070083675	3.94492443412927	3.69228415323737	3.90612140047593	4.0194550937176	4.37247560388195	3.8180575769965	3.62776615397264	3.94008910474693	3.82449172908128	3.95885284528151	3.9526259491268	4.2547877052314	3.98481260721785	3.44416748770794	4.44119197108142
23066342	3.67006846563301	3.70130796030605	3.73187623179018	3.80617893465467	3.67150621264071	3.82532259502875	3.89373452740536	3.68680555502507	3.63172483737402	3.71753886794235	3.81989719232226	3.84455769815166	3.67079211308683	3.71829585812922	3.80189613368763	3.59593513278488
23066343	3.88101213566708	3.89787583490418	3.99543365323338	4.08570063974608	3.91216825430945	3.96596287391662	3.69953627635367	3.73236275822294	3.81904482005921	4.24499329041094	4.24508972693947	3.98539033505875	4.05542132162412	4.0420750565104	3.84403860023372	4.0277380684037
23066344	6.33785468839599	7.06873952556685	6.28535966816896	6.39649538274166	6.42076276132815	6.44820970858257	7.105082256126	6.78673116154276	6.38398813666153	6.72190607571328	6.33319639384167	6.535493478484	6.35242500334986	6.37874740450487	6.53594260190019	6.33194357591706
23066345	4.04910134035035	3.81246713718304	3.99403871140438	3.85784836525706	3.75152502576818	3.81668037495132	4.59373846022904	3.98419481728403	3.91881226944315	4.23875449489886	3.94513491419785	3.93132754990537	3.93601293051359	3.614356449133	3.75565360315216	3.94065373922413
23066346	4.85665620196411	4.99229828405981	5.19209712010289	5.06148544430646	4.28824568578509	4.89590973190136	4.69542557698708	4.96710695637193	4.93029095453489	5.03846279410106	4.61777358018224	4.53614223742611	4.26303297250439	5.62604354518961	4.24469013641215	4.4716871515377
23066347	5.13951717776132	4.92606151284568	4.90207501015199	5.03542431464082	5.16850267423933	4.74864129439966	5.17726596120652	4.94994230884074	5.32937971630371	4.99578046850452	4.74819239308746	5.23755223689951	5.52862755461967	5.12519214491491	4.59344490521878	4.84885502756969
23066348	4.49860754479206	5.25875684981339	4.91316296002477	3.93055479546022	4.48782716494137	5.13951301100018	4.6542460121742	5.45401921777465	4.55561344171195	4.49284492964538	4.03287794310748	4.5798552249595	4.32852762624807	4.65331080624421	4.3866791490719	4.68092378505788
23066349	6.64236463261434	6.66157291271908	6.84691442909101	6.93374450773679	6.3891254048539	6.79445344786089	6.57941059353294	6.67894454209503	6.45621706606891	6.65637337822229	6.64746738861963	6.5445326243157	6.28701824947978	6.6355128493428	6.55271947850995	6.73057033026733
23066350	6.26953308342281	6.05964845695038	6.00531691487139	6.12917188935578	5.64728461256022	6.09026541204392	5.12140316797817	5.99193258994485	6.12681204880965	5.79700899511707	5.77843563800507	5.91634263919833	6.41704428658491	6.03406297153711	5.8371127341849	6.435328479163
23066351	8.10664114359643	8.58080340688039	8.47804350747894	8.58394152145886	8.3060449929178	8.41326209223284	8.48031751586028	7.88216144094548	8.5843418733109	8.52688911995562	8.55111560815101	8.34416965411562	8.35357664589724	8.65891584906418	8.48371528781284	8.50836683141146
23066352	5.7039474458433	5.48246998823528	6.14611262923285	6.12881221714794	6.03823918587067	6.34412921775236	6.08195367582677	5.71373429638695	6.08017061084829	5.46455734987988	5.87794166979439	6.06132980121447	5.92649135964384	5.69656707097143	5.1513978847212	5.36996286540129
23066353	4.3279861870658	3.80575039794507	4.24443433174439	3.72835261333171	3.9960106679732	4.02406914083796	4.13067475754618	4.06149037090684	4.23990168175696	3.77285349976178	4.30501753120951	4.1231770659342	3.76480690446872	3.91279448542661	4.06647480578504	3.85870326526213
23066354	6.22463890619287	5.84649843771137	6.24718555723903	6.13859836368887	5.94342613601218	6.70650596625205	6.20257332852013	6.31176001563423	5.5778228329452	5.54498132985854	5.79745758903128	5.72403240957303	5.78462398813315	6.01269848669813	5.67869927311234	5.97639553718277
23066355	4.5484179307284	5.42150924541295	4.89375368418738	4.95479534223236	5.04702136155384	4.9069803316807	5.37175628362588	5.00758485970607	4.54535265847538	5.34442326099942	4.77000184061758	5.08594381196412	4.64506752891209	4.54864700406208	4.73604955303555	5.51009768003163
23066356	4.36653003653584	4.50888905448569	4.84560801202133	4.34999076146143	4.53797740562561	4.87428940450701	4.56606850949408	4.50158283401148	4.19036513374311	4.93427910203506	4.79597140390487	4.6849038375889	4.85627289300762	4.82598935352622	4.52276633999697	4.81498514589838
23066357	5.7436254473644	5.88217871401549	5.58692772749971	5.67149788743166	5.9353244121653	5.65591065195011	5.88144973885097	5.66169703124995	5.72024510502545	5.39663612184344	5.61681625238717	5.70381462513656	5.81329801269834	5.4885852197807	5.60494242350691	5.63489772784128
23066358	7.06935253125592	7.37948293875793	7.39689571185239	7.36110824383124	7.46924112703485	7.29040221597546	7.66007314416788	7.47640246701222	7.02478033987575	7.04932888610964	7.36173350354649	7.79622300433469	7.32001648796002	6.93541469828711	7.37177121390626	7.49992532100526
23066359	9.36180426004871	9.19426217129905	9.48310597822148	9.31335121342765	9.87020457464779	9.43019385178535	9.49350879117378	9.73072185731453	9.40851110010848	9.05308204552573	9.32463584137975	9.0428265770676	9.23829380020807	9.34345762357783	9.35580038895497	9.30219664613053
23066360	11.2763529017331	11.3419968532253	11.3895328337784	11.4962972053358	11.5089952286516	11.53781180935	11.6518395240828	11.5801153353629	11.2041458913428	11.3034311696967	11.3270173526927	11.2422648723982	11.0715948335615	11.3216090217449	11.3581973998442	11.4537282324206
23066361	6.43694981105269	6.44486593399206	6.17886718907315	6.23652177877875	6.83514139816556	6.34794275831022	6.7165161735355	6.21161742279704	6.62520183514446	6.15957846058812	6.16147406264503	6.32826170358914	6.34075894102965	6.53398196633567	6.47939493522576	6.323549437704
23066362	5.42891132326979	5.42658471389342	5.48209979706344	5.4003145865033	5.59654699474268	5.48118623264269	5.56869761684591	5.52475143102701	5.17782500482866	5.34497235896682	5.34866858652445	5.51888966230995	5.46318570204265	5.64651955606264	5.2667209400413	5.22112859019901
23066363	4.85364696146343	4.73433012389048	4.84412529441211	5.15445470881698	4.76779169303899	4.47545290449107	5.29103962714438	4.95730962961586	4.70996474037316	5.06727454968289	4.92569355331638	5.17240272091189	4.84826228924884	5.01491281665853	5.16784170842892	4.84086887432635
23066364	6.0818464163468	6.154027416061	6.32934799036089	6.40485484085487	6.55932779342436	6.25756700514315	5.91470065279574	6.37259131032546	6.09245637060824	6.33180745256312	6.00760669860678	6.18594772310868	6.10059964555088	5.80790892358042	5.90735525850149	6.04166987791474
23066365	8.3274695963347	8.54269800201118	8.28923471714167	8.46545934345328	8.13456558675976	8.23569706338818	8.21942668961412	8.10429713341473	8.55839096823937	8.70983015143591	8.48243282295313	8.48216776033053	8.23408467642911	8.51407443462418	8.28612115060457	8.55900640746819
23066366	3.78724070083675	3.94492443412927	3.69228415323737	3.90612140047593	4.0194550937176	4.37247560388195	3.8180575769965	3.62776615397264	3.94008910474693	3.82449172908128	3.95885284528151	3.9526259491268	4.2547877052314	3.98481260721785	3.44416748770794	4.44119197108142
23066367	3.67006846563301	3.70130796030605	3.73187623179018	3.80617893465467	3.67150621264071	3.82532259502875	3.89373452740536	3.68680555502507	3.63172483737402	3.71753886794235	3.81989719232226	3.84455769815166	3.67079211308683	3.71829585812922	3.80189613368763	3.59593513278488
23066368	3.88101213566708	3.89787583490418	3.99543365323338	4.08570063974608	3.91216825430945	3.96596287391662	3.69953627635367	3.73236275822294	3.81904482005921	4.24499329041094	4.24508972693947	3.98539033505875	4.05542132162412	4.0420750565104	3.84403860023372	4.0277380684037
23066369	6.33785468839599	7.06873952556685	6.28535966816896	6.39649538274166	6.42076276132815	6.44820970858257	7.105082256126	6.78673116154276	6.38398813666153	6.72190607571328	6.33319639384167	6.535493478484	6.35242500334986	6.37874740450487	6.53594260190019	6.33194357591706
23066370	3.71265173834012	3.68296301231858	3.51925215341108	3.53137718797456	3.48423851013777	3.45540699950711	3.86006994192013	3.66553734064671	3.47850621379065	3.98685531774975	3.62796403937463	3.60485637262288	3.60256067666025	3.2878852718505	3.49182721493355	3.6057148835567
23066371	4.85665620196411	4.99229828405981	5.19209712010289	5.06148544430646	4.28824568578509	4.89590973190136	4.69542557698708	4.96710695637193	4.93029095453489	5.03846279410106	4.61777358018224	4.53614223742611	4.26303297250439	5.62604354518961	4.24469013641215	4.4716871515377
23066372	5.11808618595059	5.39447906171782	5.42266264268356	4.99946742222179	5.5365426151079	5.85834387127741	5.58850067154797	5.55069249395754	5.62050667141114	5.4106605190419	5.09518619149193	5.45123489598292	5.58479715784301	5.34118998505605	5.32116513471395	5.24395430301109
23066373	5.22895505188888	5.34707346724488	5.86295405423999	5.07032141420027	5.07091130980682	5.74906651517442	5.41967680922723	5.34822355102421	5.14135645974873	5.257913861619	5.36693174645477	5.58052850743315	5.32381688940089	5.02969719495609	4.61588104821921	5.5233155033905
23066374	5.53299940043776	5.51655924279051	5.51197742020141	5.46070970159968	5.35545122942516	5.69643277129865	5.69384700560141	5.59259331381515	5.25950629216525	5.79086931528614	5.45992006107687	5.64560816085501	5.64586199537978	5.6182943248453	5.43973065127396	5.6866138315746
23066375	7.73455887705365	7.78922408537212	7.59317095566491	7.80823038725132	8.27263276835492	8.1166617806733	8.16932009130271	8.09664187728066	7.55143117485669	7.65857424440058	7.7775168234294	7.5169358379269	7.8039255778789	7.5674312117259	7.59640795922982	7.67115508652019
23066376	7.67819400753694	7.71576256864473	7.94919503120899	7.9497007018058	7.15761875949812	7.75691169318051	7.70667651554475	7.13596255916649	7.86819706502324	7.87459408859192	7.6857240843326	7.55924872621499	7.63179682241752	7.49304789917264	7.54275062543783	7.64303805707023
23066377	6.26953308342281	6.05964845695038	6.00531691487139	6.12917188935578	5.64728461256022	6.09026541204392	5.12140316797817	5.99193258994485	6.12681204880965	5.79700899511707	5.77843563800507	5.91634263919833	6.41704428658491	6.03406297153711	5.8371127341849	6.435328479163
23066378	8.10664114359643	8.58080340688039	8.47804350747894	8.58394152145886	8.3060449929178	8.41326209223284	8.48031751586028	7.88216144094548	8.5843418733109	8.52688911995562	8.55111560815101	8.34416965411562	8.35357664589724	8.65891584906418	8.48371528781284	8.50836683141146
23066379	4.8475822844326	4.89493058319704	5.1849321678376	5.43226830421164	5.18168063641728	5.48757066829897	5.13921036175902	4.90016428532838	5.17597583376252	4.70603199914156	4.80893842651395	5.05251438203241	5.01693973688589	4.32394000700747	4.44217042439458	4.75466576726259
23066380	4.3279861870658	3.80575039794507	4.24443433174439	3.72835261333171	3.9960106679732	4.02406914083796	4.13067475754618	4.06149037090684	4.23990168175696	3.77285349976178	4.30501753120951	4.1231770659342	3.76480690446872	3.91279448542661	4.06647480578504	3.85870326526213
23066381	4.5484179307284	5.42150924541295	4.89375368418738	4.95479534223236	5.04702136155384	4.9069803316807	5.37175628362588	5.00758485970607	4.54535265847538	5.34442326099942	4.77000184061758	5.08594381196412	4.64506752891209	4.54864700406208	4.73604955303555	5.51009768003163
23066382	6.22179190517623	6.40444041309975	6.27145000658814	6.529565466011	6.43897148883099	6.55807729237575	6.42281774866645	6.46760938026853	6.35250783514519	6.59542070264528	6.36856336640528	6.44037303329556	6.52932315765515	6.37794676590916	6.53929824820527	6.45468862150437
23066383	6.66781532010564	6.83735356154644	6.72255183426711	6.70060869162764	6.70790662137435	6.86858559423194	7.21913777346596	6.57055031478625	6.50041712999822	6.86742605014964	6.36595053219241	6.88791460664629	6.72286984787944	6.64696337805196	6.77727699717287	6.59367390126408
23067465	4.85871040560048	5.18606672119978	5.30157953698495	5.20632215861967	5.15322598659645	5.22770332943782	4.99881880906331	5.42925757807416	5.46573561399492	5.28596848667617	5.17241987598676	5.14450457510322	5.20072540988241	4.55225587845888	5.4567650894363	5.31835632463571
23067466	8.3995750738374	8.52554277648645	8.30053303304033	8.65925501422358	7.86211365524577	8.43119616588334	7.58087170925977	8.24535749985112	8.35419414290824	8.56581379348729	8.27231457687457	8.03269101116858	8.40686558171511	8.44062901477952	8.3629211793618	8.1330513080245
23067467	6.31096273176354	6.35375441927948	6.5368784644229	6.16734597749871	6.21482989305512	6.65999634084996	6.54983713475066	6.04342467086483	6.30441768384844	6.3712132318489	6.61353061781535	6.48932190705565	6.34768379547479	6.36136926997798	6.37804899802404	6.28484846190274
23067468	10.4253089165509	10.5453590297029	10.6539082093023	10.3395991221007	10.9931298209397	10.9463720254137	11.627413063513	11.1464621066848	10.2745915099291	10.4413346733464	10.5419642800602	10.7043585005044	10.545795002053	10.335432311671	10.4728908301578	10.5167574168865
23067823	6.41967647465349	6.73494347583365	6.20807771240253	6.2841822664992	6.33346206529139	5.40250576477534	6.39291014920005	6.24613952828024	5.56993791729949	6.72380673072358	6.0718064851346	6.12799130964189	6.1934227370814	6.19560112632437	5.82311599435351	6.22317659794508
23067824	9.71100151616813	9.4948758403944	9.99926913985838	9.72072305387063	9.72460928842413	9.42168437766055	9.71294990485694	9.84448411103735	9.67293299539807	9.39852760863372	9.79071464379019	9.64649756047787	9.62702085156248	9.81306844469625	9.86892750861572	9.84071003753761
23067825	8.61287576913665	8.64709799222437	8.99855203067911	8.86392265187439	9.17429573810989	8.9544237385882	9.10126731250755	8.8618008268283	8.90906261229222	8.74384387142605	9.00856692469602	9.03953690664124	9.13574980869174	8.87867742786293	9.0025867177591	8.72648878075778
23067826	7.28441277137028	7.10259948990928	7.10118198570028	6.88009808638601	7.12183335433166	7.13693429124155	7.6268558566182	6.91419180437572	7.37884603980606	6.61750468079112	7.09855111492395	6.83548884368795	7.05210205964633	6.79839591554981	7.05834113255408	7.19059535993177
23067827	5.72258047372958	6.05138601808541	5.96782549174437	6.240990049084	6.20867703860748	6.28849278134269	6.58129189767096	6.47277530410327	6.04129862619955	5.62693451960005	5.84926616398375	6.19749773180407	6.27518643876705	5.80598349841907	5.71774890754768	5.81870477153704
23067828	6.88652806712607	7.15858630471711	6.78419647161712	6.88876634625243	6.68648708978276	7.03838982112988	7.37993534464665	6.87826333956056	6.77918789410085	6.7828771705484	6.415227680686	6.47136191070579	7.27558650281244	6.78126962203027	6.51254634882535	6.72975537707623
23067829	5.93955652595384	6.13940497629899	6.42759395258115	5.93026393646245	6.30490768558831	6.48530923431836	6.36476774248533	6.51323274776948	6.38659120847816	6.00508834313522	6.25133610681526	6.60732638909962	6.18754461149262	6.20473711258434	6.71273157690231	6.51175151981821
23067830	10.051869357876	10.0631221250788	10.1871358479018	9.98997476107428	10.0524036014641	10.1670733834366	10.1225018023843	10.2598880915053	9.94691861621954	9.89596660692132	10.0281115813912	9.90968553580852	10.0564099261293	9.96857416699571	10.0813164734214	10.0869183752349
23067831	4.04581082666375	4.28472389296877	4.77363647136569	4.34224009698155	4.72218699592356	3.97541636236988	4.30581728149269	4.32166216333978	4.03270933315966	4.44591871798792	4.68816552269428	4.11885643083123	4.61330821608416	4.44432635437043	4.29653583297903	4.20792110352733
23067832	4.972278954137	5.08905298447239	5.10154345254321	5.06846214115574	5.42834548652324	5.40203965030425	5.32477351223227	5.277472677955	5.10640800241352	5.22457145473221	5.13317511392188	5.09836027698257	5.32974226462383	4.99665530969554	5.21866859406268	5.68789999714086
23067833	6.39480402850149	7.13695637149808	7.06576080732316	6.73573142539363	7.21920928408108	7.07505638403033	7.02829229625792	7.24262113069837	6.51512222581087	7.04843498029287	6.60201959842346	6.99414832952929	6.92004377294669	6.45187084764708	6.69554444398052	6.65708983509074
23067834	6.60009907153021	6.59891534245367	6.80735324762034	6.37277775121896	7.1188612808588	6.39889396139259	7.0230672854153	7.20784372733072	6.59982352236072	6.70384195298698	6.65092424577781	6.60262211389049	6.69466077999872	6.5584879121819	6.50404749175265	6.44894699886073
23067835	7.98583188056598	7.51462859181263	8.30569050408075	8.07841577148047	8.24313627356418	8.2695521960312	8.60184982138378	8.66244898606003	8.1303837433713	7.66740017920887	8.03503407010125	8.18928796055298	7.92385787231608	7.89972836045163	8.29745194576384	8.11808835660656
23067836	9.00458307785151	8.68901125775441	8.75589191659061	8.88406405465731	8.93986601146468	8.56205953571644	9.02555325674382	8.75138452275065	8.91917640925352	8.93961584260836	9.1634138099613	8.80820304809733	9.01941255873708	8.68906356376075	8.69191007775271	8.8324646870429
23067837	7.4051870320424	7.40853529540399	7.72283021727131	7.53760108645971	6.89596297347272	7.03584225133135	7.56106955080537	7.02543453682983	7.76974648715847	7.16771634579755	7.3578765968373	7.64182838324892	7.58412906591585	7.33280028634319	7.48540326064037	7.63036856761847
23067838	7.50821773846704	6.8279944837088	7.64932601556563	7.28539162305365	7.02429051809707	7.06814203646733	7.65557442703782	7.56697011451841	7.41029049152915	7.2837283494566	7.28759760493785	7.42994895962825	6.82818501131239	7.03658000187785	7.27688009482093	7.08366686724555
23067839	9.60640086918998	9.50950055407898	9.57638299560317	9.56895383846409	10.3026312961235	10.1240071098473	9.97946069396797	10.283738015941	9.8387464516924	9.53504540209822	9.61476962216902	9.3300033856159	9.48281355803591	9.60468615306872	9.55085991769687	9.49047943501463
23067840	9.01124625273935	9.02016469019014	9.1329819984255	9.08579384829642	9.10151065229821	9.03934739942073	9.32708589812883	8.95497916558872	8.86165321714584	8.86428046563602	9.07464556082646	8.87071831771062	8.64268289452525	8.92351520181044	9.23362587596421	8.82222662656469
23067841	8.24445724333186	8.08320182587758	8.00338246761712	8.4173422384883	7.34395645481875	7.79633762307833	7.25357949809739	7.92608194802202	8.1285458944892	8.25521256052526	8.21596153188299	8.27832598550165	8.0950272045044	8.06970612647028	8.00323485213103	8.08060637062487
23067842	8.93522257832216	9.05759143685647	9.05057367848259	8.90360213416143	9.5978221997754	9.73016069268607	8.92516558582789	9.37854866512727	8.93399143423159	8.83835523625432	8.88216695789687	8.6937952009665	8.82369885329276	9.18450056212994	8.70560978001661	8.85765459077016
23067843	7.29595907122521	7.33750924411001	7.54273602664551	7.33725759841679	7.77299383497314	7.58637477754101	7.69686617937148	7.70466362982612	7.2304905936833	7.39716731783259	7.44854636907963	7.67966616065666	7.24422011089225	7.37201621602795	7.48989701975155	7.41123907022971
23067844	6.19997956077144	6.3182133736594	6.05744639033604	6.23007720035668	6.52082544852004	6.33964236312047	6.53295966498648	6.69361137157991	5.7395018425127	6.21124602619287	6.42950799976729	6.82165465137604	5.85897851421604	6.19478288349407	6.32411546752464	6.06195249441227
23067845	11.4520416388298	11.5745135343372	11.5166526405728	11.5208098845232	10.0174908880503	10.6564442371684	10.1634547856182	10.2768729949306	11.5105874472562	11.6214409573885	11.6194451456465	11.6664606325747	11.5627512544272	11.617742005998	11.4236147286752	11.5909345094418
23067846	9.47860190340496	9.48574919283539	9.92572609189319	9.86954488664472	9.62347720287512	9.5370508903139	9.85636941227887	9.74962090402009	9.80106810898197	9.78312740431096	9.90913312528721	9.94689205093202	9.71221615262353	9.74504203808501	9.88351178209634	9.82378350354949
23067847	5.41641805763527	5.59410029905485	5.13092883637032	5.53791057473558	5.69222693844454	5.53921674643644	5.72670132646668	5.74326349312169	5.11535407054705	5.10417842967369	5.43088746037673	5.31899565475721	5.08230292115579	5.41623447251641	5.25551602619376	5.00789953688233
23067848	7.15695943258185	6.9618273831325	7.03707910591026	7.01554810169026	6.9813418116449	7.08289676615163	7.34246020206661	7.10765586471396	6.88693396381788	6.85962227067487	7.09100487382831	7.13053910789025	7.27664994193986	6.97889955266838	6.99447158127138	7.00534109046566
23067849	4.95699108097697	4.85194042635104	4.96604787985277	4.99506905585669	4.46115963901897	4.76948504467635	4.13348655704745	4.50164314804142	4.65071014920723	4.967748543233	4.906052316026	4.62805875178806	4.95012124762657	4.7308992226225	4.56600775085822	4.61027847814757
23067850	6.50217710394634	6.30322836146469	6.48137851912092	6.4875435142208	6.4400201918478	6.93474665976451	6.78628159323494	6.72076747248439	6.33358202165134	5.94144742253673	6.51350169757013	6.80403409702414	6.08295217720605	6.51872632607277	6.52441087077897	7.03198710729626
23068479	13.6708959116785	13.7719459456124	13.634023258688	13.6747327706127	13.4757666699678	13.442123407051	13.477573298954	13.3536871947174	13.6516137873122	13.6887869515475	13.7108736703306	13.7403095991319	13.5726875209004	13.6866400292457	13.6610212373536	13.6585955052355
23068480	7.93455120405005	7.79592059321752	7.96394540885537	8.06056363462808	8.30264965286437	8.68284243773984	8.27321503740103	8.36373821596866	8.04794480242107	7.71288616153322	8.20669883904613	7.87977255268426	8.12459458982191	7.95116684143739	7.81907979814983	7.87437674109605
23068481	8.89235842933888	8.85976902134052	8.82358857708651	9.0902263825824	9.54136063486621	9.45422238309957	9.14663701874866	9.47886168325874	8.84785128099739	8.75106471218962	8.81762878622176	8.81336357812263	8.88857074694788	8.99674508563887	8.87916160033453	8.76393968549335
23068482	5.67781504655721	5.17354072535829	5.33701749815966	5.00951477138912	5.38441901942817	5.49020571873477	5.51335550840287	5.36545095230329	5.34694100113153	5.17407033975379	5.13494774958966	5.69944766089529	5.25149221767687	5.35349924170463	5.11848831030294	5.57858671267458
23068483	7.51561520562732	7.37540643455451	7.66913211634974	7.49849789658828	7.63583707200783	8.29336733308633	7.87187940607138	8.05949729323258	7.54107134540323	7.50099964254662	7.76238183522362	7.44935163440417	7.72360132320331	7.58045018419666	7.48325250661232	7.47572011572048
23068484	7.56835517270636	7.59480410761106	7.55091924510289	7.40173590808741	7.67070732085433	7.51621482056945	7.80680930279427	7.63719153552734	7.42690739169836	7.46123234967349	7.52968514951527	7.7570424547258	7.68608902896186	7.68109483847882	7.68446785940366	7.50340705371994
23068488	6.93200245888662	6.83719409688375	6.62468209516919	6.7685808173892	6.97109775945056	7.22958506842142	7.41487777021775	7.05513881777465	6.77621818247193	6.82350073222602	6.81420575539392	6.95525733637884	6.90629525347963	6.65371217417611	6.84795108742938	6.49227437133746
23068489	10.3356894562472	10.1488702576102	10.2792988536516	10.3659112873893	10.4650356511508	10.2447653389425	10.1055092658072	10.4665840645223	10.213004896663	9.95150549397387	10.1830188103879	9.93922348816334	10.2072932354006	9.95493963638476	10.388334559173	10.0384873118848
23068490	9.35577409043138	8.9367244322658	9.12023368527438	9.06285561601939	9.19282182465958	9.23700413522253	8.90770632877677	9.05425919561537	9.01581795424187	8.94803800139315	9.10014568254127	8.97076010440029	8.99269475365495	9.05698345040131	8.87192254435991	9.04873487599916
23068491	5.80634149422477	5.11713938728786	5.5467070308622	5.16973960677069	5.19626094684853	5.74380054125912	5.1933121002864	5.43004054908798	5.23274157408097	5.25247606111918	5.12660848644505	5.63310067961765	5.23606556323659	5.59615104404874	5.03927792264333	5.14138255860909
23068492	7.28755839242418	7.43711730570768	7.03941335686848	7.06894629862381	6.99625789484322	7.37965076837273	7.65149162685398	7.28302646248875	6.81626795984502	7.07592533479288	7.09782397007488	7.43113197622447	7.45089741339096	7.04618384923957	7.12520554976916	7.1944553383469
23068493	11.5931268824673	11.5477354575154	11.3763547005483	11.6377384064914	10.3890334143834	10.2320569710594	9.57946871996098	10.3111696859859	11.67847389215	11.6128225251499	11.7614204668227	11.6596629744532	11.8838348645669	11.6618113750218	11.5865942054814	11.7003321041601
23068494	8.85800281921603	8.52097874174031	8.62474483601869	8.43574425972668	8.15419893256468	8.24238061563135	8.19289549865194	8.5171283165505	8.69724637994397	8.48179951599898	8.45436333684868	8.46400631533625	8.48662862164241	8.48898914733356	8.61731271531212	8.53123096445826
23068495	5.47962550041247	5.03957665517158	5.05575518241203	5.08446909633244	4.84459425869656	4.48387705402875	5.06545423060899	5.03744005667809	5.34366639135967	5.55245296834092	4.85698191160594	4.77203665542342	4.84961624323656	5.04256262105866	4.84437123074959	5.04305519091931
23068496	7.80473095630016	7.91020661546476	7.5747604249133	7.97255811095514	8.33560594764193	8.16322523084206	8.00761042674885	7.90427689547948	7.89957932836843	7.71371835294974	7.8378747878746	7.94288556582984	7.69999666798608	7.79796668295873	7.6141900690842	7.42354602955853
23068497	12.5472282353279	12.58282652627	12.6467165698443	12.6896300527314	11.8061176986429	11.7130071355304	11.4877740029676	11.7686143647884	12.5763267883888	12.612398395437	12.6764422024114	12.7113544709788	12.5940568135227	12.661741704742	12.6845409908224	12.6217658690118
23068498	9.32066485041494	9.28336503332226	9.18996575091703	9.15536361180724	9.44209529922625	9.54003438969352	9.5997216968613	9.46437999659591	9.31299967949371	9.16963579061245	9.33771787804812	9.3155409732999	9.20175789449565	9.20233088787226	9.17330736123451	9.24617581792466
23068499	13.9256128040447	13.9595256520298	14.036900248043	14.007652078814	13.2354053160275	13.3161843966048	13.3517907326232	13.3619387735381	13.9725012289734	14.0427576463753	14.0639995175733	14.0392939254591	14.0154836260354	13.9586201892166	13.9209045193289	14.0368027257528
23068500	8.57503787463344	8.48693793163873	8.59604762544387	8.64768438530102	8.612756675594	8.62474958311394	9.25886678043797	8.62194978118507	8.51785831859208	8.36867875149724	8.85190712267898	8.53411301980622	8.32515795210198	8.77802296907761	8.16392109481334	8.65936811283749
23068501	4.18425734315886	4.16814615917402	3.95422031091454	4.45551060823847	4.84392955673875	4.88362659440503	4.53825097054286	4.5100981366242	4.1844206632698	4.5281722397968	4.05421012420549	4.26222325066966	4.47340828829802	4.2886080546675	4.04298158974648	4.25178866434425
23068502	6.90908739006072	6.76891056849073	7.01646824417771	6.72085336394842	6.93827902153888	6.8863468228217	6.89353168825809	6.90336922169431	6.79205120529661	6.91055653244489	6.86737517148942	6.90345689636534	6.83306932100951	6.99202594959004	6.88892600904556	6.71555110597235
23068503	6.81005045486125	6.85329598901415	6.85383922782907	6.80389238688831	6.79158941040793	7.05267335776555	7.28868662723442	7.02354032626496	6.8038030729553	6.67575006958185	7.02194966452104	7.02540842398011	6.97557397298052	6.93012904560371	6.84594002497521	6.44594312160803
23068504	8.71203423129704	8.10526449738383	8.42783566722613	8.57608905405123	8.74380194592604	8.68345318787262	9.09416159399026	8.90001479220961	8.38714410483513	8.53132001668754	8.382946581118	8.23440303013869	8.41464267922893	8.35266797462363	8.45561917088311	8.44077429839892
23068505	5.51388380077804	5.06327202570231	5.134247759575	4.91234356865593	5.37759753470707	5.04735609703668	5.44277738818185	5.11278544341216	5.26357271892203	5.05773957079262	5.20835194732768	5.64147624319285	5.84442673824383	5.66350969505024	5.0433287088198	5.46109669912707
23068506	4.15633800962273	4.25363689214271	4.11440315050199	4.36443931477791	3.77938001422616	4.06300018332987	3.76966621541485	4.32242847530592	3.86496190395271	3.91306788808854	4.09926040327885	4.05261599609487	4.04251521381789	4.03702019345844	4.16374370814138	4.06918640419021
23068507	12.6204624219171	12.7844922215436	12.6207171978945	12.66092348705	12.7293545190187	12.3411883260709	12.4910823163445	12.5799222996761	12.6367695677195	12.7066544343089	12.6581027902208	12.6847060276945	12.5814643675564	12.6217360397935	12.6727831534158	12.594148288308
23068508	7.1570953819767	7.36052816179571	7.28489989511587	7.51933059251958	7.50171967455802	7.95453665526385	7.47281467726586	7.49918731656816	7.55398168739888	7.27323605970812	7.61588267326748	7.13247615960365	7.51903304025296	7.40584156017634	7.33654652558578	7.25301797664059
23068509	9.37998691174079	9.04866822498633	9.04287165130792	8.96334970053081	9.52616328993847	9.29723638496044	9.60284378897791	8.93931233865632	9.11133116365833	8.9359536636645	9.08178833799828	8.93974254591689	9.08966917041454	9.08106353087592	9.03579614920523	8.96232831856529
23068510	8.62270280770721	8.43587019171742	8.29027926271822	8.61546156487719	8.79944281245253	8.58164887705654	8.86921166324969	8.61921589760389	8.57875887083262	8.41760941342119	8.5144857812953	8.56033367775904	8.4809111116183	8.19688126809123	8.26215841049864	8.39980641730431
23068511	6.87631051492284	6.5454243123052	6.81741903441348	6.82941906261358	6.71606157233615	6.82971093830826	6.84347263618473	6.85217609508259	6.78873539933316	6.54394131699067	6.64938549570377	6.76966536775055	6.03942427873952	6.51584955077773	6.34119265075022	6.80087541955377
23068512	8.35408043752578	8.06318590846716	8.21255683360094	8.39449858325388	8.34927952143355	8.48327141064581	8.84840494900392	8.48654691955943	8.26934049751018	8.05970451981812	8.21751959063891	8.16126193441423	8.18447931101809	7.96781718768781	8.17738628852617	8.18172307135332
23068513	7.46873534908453	7.42468657015334	7.37340207242892	7.29238611529171	7.41051386934614	7.58559866760062	7.58657248878186	7.88221108969243	7.52958657288878	7.52932519862683	7.55957575131417	7.35787710453992	7.18682065605369	7.46369605263503	7.42679769347386	7.43567975319881
23068514	7.63026315698034	8.32373438678236	7.84373459367052	7.91626667544101	7.95649742080541	8.04298200301035	8.19314678860869	8.04621019527564	7.92622570995225	8.17333774556199	7.83079648567948	8.05628393672435	8.00602178918103	7.99398274386958	8.09435685665965	7.76689644798345
23068515	8.88079424222374	8.6786649026722	8.81775838685284	8.82860264879279	9.31008185246567	9.02043063047469	9.04378912343715	8.79902280642343	8.8370627938773	8.70658675724271	8.66818431428304	8.57949496757258	8.80818960421901	8.59433154632235	8.77467956294121	8.91279640746978
23068516	9.48241224761349	9.52199380165771	9.65767258111467	9.60955161238656	10.3020920387944	9.95158326577988	10.2653668280578	10.2064787634727	9.47836503007473	9.51757909797732	9.41259594218076	9.52545180280942	9.23864216523861	9.37113097800675	9.44186823123913	9.81976153125381
23068517	8.41395655286432	8.33413768988098	8.34706508347531	8.29497915728953	8.55632381337355	8.55999448057674	8.88528869828064	8.29631443052019	8.68805352674751	8.14169671482699	8.26172560065845	8.06352769511086	8.43166698002838	8.25926112962842	8.57788150598051	8.17689999381851
23068518	8.2568131472976	7.89288679827174	8.04264275283597	7.93125462031904	8.20130860508005	8.28474951531631	8.58920147489338	8.30617209636279	8.04342851446445	8.0108227432226	8.08293083443557	8.24818079622096	7.88491002264744	7.96353787372137	7.86820608250667	8.08861819543844
23068519	10.8387333622317	10.6968963658437	10.6078712373612	10.6775499277171	10.9365472237179	11.1695604169285	10.4582660445567	10.8753010594313	10.8205359648225	10.6822902809249	10.5677347767476	10.5269341204733	10.7362937744223	10.6810244317821	10.5537798927294	10.5649155258567
23068520	6.6411180658972	6.66380163174319	6.4857434504723	6.81500740368015	6.66496651676663	6.67747507635986	6.74011983739655	6.53523776472647	6.87868098431404	6.61446243501328	6.92367998925286	6.67852266379221	6.4605130174228	6.5446409233439	6.69389111073789	6.20717872718014
23068521	6.93564767201098	6.97515128772566	6.94182154919248	6.82037291593233	7.1003195414193	7.2707336557379	7.316992550394	6.97583100658677	6.88550368825166	6.86803426741202	6.96352394652269	7.39656421874613	6.97616917317669	6.77535112090493	6.63980822113202	6.65419833257002
23068522	6.04527433314555	6.24799945131017	6.52412014103206	6.59188621124509	6.61823231072316	6.2465930053794	6.19853998832549	6.62465156765329	6.47906088277262	6.00469313132505	5.90042924914831	6.18613697204431	6.21090776235406	6.01944836032767	6.5769108890547	6.28954520154764
23068523	8.22867209884928	8.3664656566515	8.99908465883839	8.5225357923841	8.0610564775332	8.50973452609121	8.01900726396566	7.99743670579036	8.4310651714622	8.21099838058279	8.48901194066509	8.10411836532172	7.97909780668097	8.19928733531131	8.47976943043291	8.45432924553847
23068524	8.37734501333532	8.54998217874296	8.75085419141767	8.68103648184067	8.86614048499092	8.96193365114573	9.30663470387127	8.79886952761816	8.41963064025444	8.4208660399895	8.41763768228476	8.47404935261019	8.32132619015254	8.2813944763699	8.54783677885566	8.41384823443431
23068525	5.84211108242048	5.29307426983394	5.43530571470584	5.15037410837589	5.43191151088351	5.59797178235893	5.42322441463951	5.4598550975637	5.43949253702428	5.27873219249147	5.22640541078634	5.79963078686882	5.32353327069719	5.45368236767816	5.21867143627648	5.49787017861943
23068526	7.20571708868357	7.27156121340758	7.01927609747889	6.78908428209491	7.47239426874382	6.93344203344703	7.56308912260915	7.05264268170471	7.07820556833003	6.97001239159358	7.21460654942437	7.13720153599306	7.54098230929831	7.08796982129428	7.09078307671958	7.11772582295359
23068527	6.62024944406742	6.29353924910753	6.44160039185309	6.52338581240944	6.98796305097305	7.24379977224631	7.0902225271503	7.13491077677804	6.75655051538013	6.49009152064924	6.51140456040306	6.69434524242716	6.4565320632866	6.36212699926562	6.54331351609209	6.21260482969045
23068528	8.33708293709064	8.05795457751542	8.2924900159358	8.14100399561964	8.91643799062797	8.64878870663376	8.79650165343101	8.85175279400412	8.42257614801591	8.31985233581923	8.34024414186386	8.35294396267013	8.33518305454665	8.4855116404205	8.30032228833494	8.35435297816797
23068529	8.72556732180209	8.66033752075547	8.75582276585006	8.85561404057855	8.92710960741537	8.85820909849343	8.96397291834065	8.66818958510918	8.63674594547787	8.85062454178254	8.68674382139392	8.8269055196802	8.84823980991469	8.68892458035101	8.77880093780053	8.99726980677362
23068530	9.86419402143983	10.0635739997079	10.2724076026383	9.89608096805033	10.9764097570852	11.2131747311511	10.8030229569622	11.0926479248097	9.95124032411257	10.0268340568547	9.78388315448735	9.92566961546913	9.73173972129115	10.0996616272119	9.93357767487882	10.000153126788
23068531	9.58838576442479	9.48906122632233	9.88327993355528	9.54436190489829	9.80982904804446	9.66176453602386	9.76750376413674	9.72543539474445	9.66065249225003	9.26543321118939	9.50874222900963	9.38985474920824	9.53218509770831	9.55098875650785	9.63936118619423	9.45029707756203
23068532	8.00838686539324	7.69783820647775	7.83147754278075	7.9800509787358	7.94866288446803	7.79054175997915	8.45183797268746	8.12717826982761	8.0931805371044	7.76345192822424	7.94173414368519	7.59266661203093	7.84843076177906	7.87162785969022	7.54149340599796	7.64911849621671
23068533	6.29465936640439	6.19870748575546	6.41639056702066	6.55527317297039	6.77716595299835	6.84016137102882	5.93703882465113	6.1513994172343	6.07247492959145	6.75987965953339	6.25409431911303	6.15886679766237	6.37877921455673	6.27510149761323	6.11792293667895	6.54332656405424
23068534	5.23053840998579	5.45061098279755	5.55381079339345	5.13023158776309	5.43361416063287	5.39784714653372	5.3345471271513	5.31783409635	5.13927996000529	5.7723072567096	5.1878432949411	5.76764556881261	5.60284599873587	5.53394028160159	5.57693135925929	5.34041055922568
23068535	5.63582575228837	5.79780423323988	5.28454467902477	5.80533682973089	6.12722755167905	5.73753848084513	6.08703456360532	6.19727710930913	5.79143788442474	5.59588413173783	5.56709536720919	5.97239769092636	5.65792413765562	5.7848437695016	5.77280321462681	5.86280032099338
23068536	7.71444640814828	7.31002934157896	7.32000320475619	7.24465104354773	7.53236979940018	7.44220207052341	7.60706103766693	7.61880260032391	7.27272332732174	7.44850500443959	7.27723317536087	7.15650108731794	7.41841480366539	7.55419233115275	7.48942770362259	7.46319187600933
23068537	5.38369784077022	5.27499267512674	5.59491231386565	5.38282750346459	5.05284596139792	5.53488915286658	5.45827644915557	5.38994245558512	5.20382399994643	5.28147624356601	5.18344289046047	5.50715170682822	5.11614262875323	4.91125424753891	5.15045833345355	5.14820439328746
23068538	7.42999641090854	7.41812589906942	7.26215761840757	7.33678628464672	7.69140475640781	7.71438276847412	7.95758117558677	7.66232743375927	7.40228153952786	7.34631933099532	7.37568718912667	7.36253959732136	7.37308190645371	7.34128563665333	7.3216077446118	7.14875310785862
23068539	9.54001415950266	9.37574898259906	9.41159739200679	9.39768848779805	9.61239102345139	9.60557075649095	9.23183687028949	9.44833063033954	9.35304847217113	9.42211882018276	9.37274392631059	9.43990822618309	9.40181092130984	9.58052287007272	9.52860579550194	9.41080597929208
23068540	5.80634149422477	5.11713938728786	5.5467070308622	5.16973960677069	5.19626094684853	5.74380054125912	5.1933121002864	5.43004054908798	5.23274157408097	5.25247606111918	5.12660848644505	5.63310067961765	5.23606556323659	5.59615104404874	5.03927792264333	5.14138255860909
23069176	5.84988286873919	6.18437408041456	6.05757682736708	6.16203165198229	6.17521419478634	6.23749059343939	6.26914328996885	6.00212631081542	6.2391739189814	6.3066432674102	5.95399474243266	5.83511161309059	6.19298356996295	6.53131104624047	5.86730195778481	5.99759984246899
23069177	8.21233866050881	8.16608544371656	8.09365351109768	8.14345583692929	8.09121473736291	8.42370130997442	8.66582233541849	8.40808172914775	8.09040124458847	8.29713394885409	8.34649466379034	8.13948907214789	8.28375663557769	8.12718353873915	8.36325412143715	7.96989509685974
23069178	4.76344165540619	4.78826989193021	5.14747768747301	4.33898033346712	4.93566269234009	4.99892381768148	5.50768061116651	4.80337844636498	4.51277076885918	4.64286941222263	4.27698502073835	5.25646079511983	4.71235201895585	4.64545091200207	5.09269066837279	4.47969947556805
23069179	5.71957464953892	5.62170832864259	5.49662835218399	5.39897194287187	5.96425605408944	5.85276953969307	5.81705442376349	5.90301692078166	5.3000982161529	5.55170725025337	5.26947673900384	5.66459964102916	5.93735243360511	5.6095952453225	5.61769540141804	5.67424910737367
23069180	4.52969503004193	4.38830847939354	5.00594970461076	4.49782880829761	4.70823854494474	4.65282870247418	4.67583171625742	4.6294188663058	4.67946730237086	4.39103682598976	4.44407439632452	4.53188253822782	4.37494221857769	4.66615660058057	4.45350317959895	4.55069040860493
23069181	12.0263003833204	12.1419941047083	12.2814660573489	12.1091107662695	12.5787225063102	12.6434467701206	12.6590512945319	12.6655006889938	12.0454226364045	12.1086535633052	12.0064276232944	12.2558879192203	12.013024054353	12.2011544598458	12.130132374681	12.141847597181
23069182	6.45820633691011	6.86874602204224	6.33774499563981	6.83161726257616	7.00542072211788	7.47072185269578	6.7285299719146	6.64963469400329	6.53514387484475	6.60181252526999	6.81931725422852	6.44257140945476	6.84722403098031	6.94854075750927	6.70037536502138	6.50604661088878
23069183	9.68622773335199	9.63095797916566	9.82607279171579	9.5660244651205	9.81528735381492	9.87072838027382	10.2843217402354	9.80451212589558	9.26773455230772	9.67751513119126	9.64712487402906	9.88390266706456	9.72493458992222	9.52511324869728	9.73868514267883	9.63333187726889
23069184	11.1261373949634	11.4745931031536	11.2658795519601	11.4533942155886	10.6614904051967	10.9436185975891	10.6382639698782	10.9086576931297	11.0939093154954	11.5209951426028	11.4516200964767	11.3003553009417	11.2174875169267	11.4990638525347	11.2867362919454	11.3355534931349
23069187	10.968924630062	11.0378446324606	11.060732962698	10.9982883017081	10.9646664977231	10.8467593179592	10.5814838587898	10.9666356073673	11.2672044480162	11.0685668002564	11.0456544227478	10.9301413484849	11.0881597540791	11.2473054985505	11.1669888783122	11.1296469493798
23069188	10.3040525782535	10.2271021344346	10.3112891215794	10.1351485130541	10.242046442772	10.2202055583742	9.90586359193374	10.0853719380037	10.3591019012479	10.1911235813309	10.3697055030922	10.1745700586303	10.2968927744245	9.98723370271508	10.1648330264963	10.030405536039
23069189	10.0187957805497	10.1053236933921	9.89592329082928	10.0728107982898	9.78779269196593	10.14419119203	9.20879940813179	9.79672311888932	9.9186856770174	10.2755787021928	9.98819432991797	10.0478469783054	9.90407322535316	10.2113490244447	9.96048692281905	10.0521175081857
23069190	8.75748300460785	8.7403839432986	8.70251325128161	8.96598767897479	7.86433060071219	7.31324579890095	7.17727024073816	7.50165093233111	8.91248386967928	8.69297922392312	8.81706279071097	8.56134401796502	8.63543633552144	8.6321574192078	8.84275840431536	8.74352169078779
23069191	9.51072771007233	9.56150385812371	9.41047304143695	9.49953768444476	9.67781653689992	9.74118167990123	9.62598220150387	9.67644737199252	9.42688913000659	9.41297659910925	9.3659023418335	9.39585158029005	9.29996121153444	9.38265876867709	9.3096403421282	9.40808811004303
23069192	8.78755924086415	8.65835829203579	8.71919231996855	8.60736603680945	8.97468211496671	8.98409081344873	8.7144776685292	9.11892095351658	8.80656456985613	8.80017223493588	8.68163875401195	8.52876589568013	8.82768975143703	8.53273656395869	8.73133446594277	8.55439140088188
23069193	9.93577627616355	9.88628191354255	10.010055091036	9.96968794906421	10.185497223346	9.99126256157306	10.0509068301361	10.0576261829299	9.97736648416961	9.94838090128702	9.91966298202398	9.65853057328515	10.0037370000539	9.91495377488463	9.85568766580588	10.0597243702647
23069194	9.33646558629853	9.43292930806472	9.74662732285522	9.28530028521005	9.96492733909915	9.65613339985907	10.0564438351465	9.77827796771112	9.46089581975744	9.24795913634718	9.60074480881895	9.50650032277597	9.40536981603796	9.22894440153259	9.58608367716077	9.4204301297968
23069195	11.8537514177564	11.7583560100989	12.0465999072924	11.7561919530199	11.6695073763852	11.4211568665868	11.7328656796489	11.5915697901965	11.9377221361082	11.7968312595972	11.842082313681	11.8057541485253	11.9009441154994	11.8146568961051	11.8795854233169	11.7702178991973
23069196	9.79642344891171	9.99782918561828	9.9324358882557	9.89572158828962	9.7848872178134	9.99084115589087	9.60085482516796	9.89214557619013	9.9948712225309	9.80124894154257	10.0363692059949	9.73050159673609	9.96160707739991	9.70806843763623	9.77150837065921	9.71013775970309
23069197	9.52129813451178	9.38432678389343	9.48637906624455	9.02060347795213	9.36643477410561	9.35821899770124	9.12252982052642	9.32061467825621	9.41766507526846	9.29232877749585	9.35183136725869	9.09979188786089	9.34602781098056	9.496982922584	9.51071073783953	9.60114053559876
23069198	5.36544878476942	5.30325438704407	5.68540035753634	5.66727246422285	5.72856924310167	5.79681537200623	6.16262729338291	5.66035002444099	5.16128959942472	5.3032078625696	5.29708186372149	5.38401652080324	5.16874399778362	5.94399251418506	5.44340990459976	5.50360525321381
23069199	10.50642925591	10.404100849299	10.4172408463794	10.4684184300149	10.5757917984059	10.6355058552709	10.6307164262431	10.4499045485104	10.504201186254	10.1097787789475	10.311471184097	10.1578284541579	10.2405916375801	10.2445396243086	10.3830675719262	10.3484113591303
23069200	9.83224071707659	9.65792914188225	9.76747591933303	9.70200050751657	9.85934480785624	9.52183628475407	9.76543463503685	9.67366028287236	9.71042408870607	9.50168127292886	10.0458219897118	9.68670061045887	9.81264242392454	9.3638577569636	9.72251314852155	9.72773689173162
23069201	12.0995043495027	11.9719585485502	12.1614267433069	11.9966587955011	11.745880485132	11.799415875744	12.2012543757121	12.1822715129311	12.1279957242828	12.0410081568327	12.0183896926696	12.1031027233525	12.1659991516089	12.0886729283421	12.078584939678	12.0102157436722
23069202	10.2004993445418	10.3062299272849	10.1936764898732	10.1219306705712	10.3800895490658	10.472031877638	10.1034058691636	10.2270662652398	10.0725601603247	10.1431392319319	10.0360102807203	10.0918687486991	9.96482334044268	9.85959059540144	10.0310654475361	10.0782033345494
23069203	8.7596145733802	8.77025733075482	8.87691493337387	8.7540757307271	9.0637792372883	9.10957138304544	9.20498422110731	8.85665415600281	8.5690129373408	8.54449940575797	8.57913537949314	8.95956072836378	8.74077574064667	8.68674625403701	8.8254299210882	8.67980845510783
23069204	7.04005010322491	7.3118913116535	7.35184056211761	7.06149009836729	7.16636118256802	7.1727760737483	7.62708078175468	7.25395034802666	6.86428612191166	7.22971826563483	7.05502687304785	7.27772623277532	7.1748981893321	7.0576851298982	7.28622371741617	7.20711788323078
23069205	8.82781994932973	8.84282331390956	8.92089743811058	8.82897757628348	8.98180343872993	9.02108535975706	8.70832619620961	8.90002799877851	8.99871462942903	9.00949473937573	8.92439946253922	9.08194019733608	8.83493563884065	9.23685818864328	8.99158896680365	8.8926789565436
23069206	7.43754710459541	7.17338924474312	7.14010998239877	7.57011823255262	7.51448183361334	7.59511127846066	7.46734834358644	7.38235510201117	7.18834509323545	6.9921890324729	7.59909757967526	7.32404002367529	7.29081307136357	7.45714885051486	7.35923053158896	7.39233593770537
23069207	5.36878008096755	5.27303176140304	5.49848523209139	5.5128280566806	5.70950552374748	5.72684804707974	6.21027023323052	6.18352002127431	5.72440146310861	5.62482496747179	5.55048647844526	5.55689622625123	5.72600846724879	5.13446257829229	5.35060420324224	5.4169402487807
23069208	7.41497202439326	7.42993443689625	7.29485158057825	7.42219860049646	7.5796272576479	7.45795389980879	7.09269751490919	7.32667991250189	7.3141241496762	7.35651788146893	7.42615131886346	7.41321768953271	7.19275430999731	7.1791230114333	7.69547757732684	7.41548943764031
23069209	10.6199603572078	10.471959308119	10.5661930755922	10.3256843107164	10.5412687598833	10.6091834264182	10.4283940448175	10.4956348323974	10.6283515948588	10.5120541900377	10.5700826774249	10.5179281499117	10.5532261346109	10.1403697285132	10.3274142132459	10.3663986203955
23069210	8.50887069827048	8.19425026210566	8.16149194815516	8.19435697556488	8.58306380701853	8.5923382972454	8.86879227357871	8.21943803566173	8.34617650849713	8.22816878473569	8.17981638505762	8.06457810036377	8.22053563114458	8.35878619034057	8.12270211335315	8.18756149895745
23069211	8.43033954078695	8.37585222612699	8.59868624875524	8.57267295784839	8.603722537076	8.67520267591208	8.34720621132469	8.60161079610124	8.65676283891071	8.51215809653946	8.60854572639598	8.56424918987432	8.53002214323955	8.41933221627393	8.52741964318023	8.4386557973726
23069212	11.5465080850226	11.6587321435311	11.2576357403724	11.4682679539986	12.0178707387966	11.8924941329462	11.8066399747496	11.913271598407	11.204045008958	11.4504894531736	11.4439078331466	11.3717838161623	11.5991978744948	11.5091377557586	11.5557077330784	11.2629781983761
23069213	8.06287291522667	7.29539172356617	7.59627669186425	7.64493013696849	8.52318238824104	7.92565853696641	8.34824745341662	8.66541560026334	7.9295909406922	7.53780809298487	7.85156848030098	7.97101467437466	7.78584645947677	7.58101742367565	8.20375265147292	8.1420833058395
23069214	6.7893716123918	6.69756901145933	6.91715778496667	6.90834018484768	6.54945318950899	7.15846465428484	7.54509167177747	7.18618567249321	7.41607524742966	6.5613607684438	6.96157242418529	7.26876786626425	6.99552038990323	6.79920233268506	7.10062840891134	6.67773543557415
23069215	10.2752133530677	10.3548357222485	10.2860929319486	10.2132247134515	10.4394881789477	10.4434090678534	10.4036342530166	10.3469199355069	10.2880110232648	10.234807523924	10.3182485019048	10.0333860741925	9.99788845429018	10.4044309238766	10.2826192174312	10.2202118325105
23069216	10.2776276448505	10.3549482090288	10.0873486037964	10.2419999303541	10.1475242990199	10.2249674709573	9.90942545720999	10.1915989313058	10.3654879996238	10.3448552712654	10.2761992912412	10.2573472640454	10.3973704228445	10.4041414032472	10.2342226828045	10.197174384252
23069217	8.73062979350935	8.75912074944255	8.82143685217037	8.72330373093271	9.05482757430402	8.83415698280307	9.21085539350638	9.09355735721353	8.76861461634285	8.67337330101494	8.59493517078208	9.02228073699167	8.99390517694228	8.61458657511459	8.69069741063151	8.75729543008315
23069218	5.93680200509776	5.90532466814981	5.86141693277728	6.12242533678811	6.24105073346106	6.18809225045733	6.51735849741809	6.21389038117837	6.03831838083647	5.94418543523044	6.07477577230754	6.15873753605932	6.00472726826825	5.99383686013117	5.90827116717538	5.97580758317854
23069219	7.91861589825233	8.28079132725968	8.16932626439391	8.10714959546736	8.42123598987235	8.46462447931037	8.35342826889176	8.40911551055805	8.11201843882655	7.82608523094443	8.00242120866563	8.12123874845886	7.69353669704492	8.03434674993072	8.14568746852261	7.84450238749762
23069220	6.69646654555337	6.87801101725011	6.76453964251144	7.00630337268884	6.9347273293332	7.15912953428193	6.99786914894905	6.50195651944907	6.85027188771063	6.91439582978431	6.75358117984298	6.8033627756784	6.94273511740009	6.97230170418215	7.07964915307392	6.65191786062439
23069221	10.0451169527443	10.1956062134731	10.0268900166666	10.1399208689352	10.4811350414606	10.6129357148891	10.525919928955	10.7331751734298	9.95980442432631	10.043938270824	10.1129853662109	10.2645782950755	10.2436811483088	10.1814360320467	10.1382433499531	9.92925706912363
23069222	4.16474677861321	3.90979830755071	4.2624310695586	4.42236217027456	4.18983581265687	4.00560720490905	4.44276191606184	4.38106495400766	3.98999276056865	4.03347852056428	3.9004226889932	4.30154871937818	4.00713076841505	3.97501124304166	3.93644189390128	4.02494026560553
23069223	7.08073055854429	7.22397501898662	7.16295289008098	6.83417416210953	7.49507961265212	7.29484852014308	7.56404808072952	7.40051249274181	7.45589128846716	7.23778102489541	7.15274784421727	7.23438010123048	7.30056195476255	7.54146605592988	7.53900779678533	7.22887030739548
23070109	10.7749576512238	10.5739385479731	10.549013352143	10.6830874764913	11.1975413785994	11.3273196041327	11.1530130861164	11.0436585784317	10.7258032508499	10.589276358376	10.5424088752748	10.5121781249275	10.5011961371571	10.5480241527329	10.6877620292638	10.6857363597383
23070110	8.84634039464335	8.93843892495514	9.02140932268955	8.71941843849304	9.66621673140825	9.74199061267032	9.5017053582202	9.45338875215158	8.89343149595361	8.71690734075812	8.95228277715619	8.70039474137762	8.69943756667877	8.93272008063931	8.87857542643574	8.99985096086727
23070111	10.3421322584586	10.1464487456746	10.3176014588132	10.0862613186566	10.7008873332936	10.7049739938946	10.6149515213327	10.6352567627118	10.3916814081246	10.1442298694334	10.2749230645823	9.95820298957532	10.1464217415293	10.07591796735	10.328592118779	10.1497168246284
23070112	9.89844845959425	9.98804231324253	9.99442102293389	9.93071606312221	10.5987338726743	10.8798074729198	10.1913545394634	10.5626897434901	9.82574665947019	9.8563192868178	9.82972559623938	9.96950096396873	9.71516528800539	9.95812507599737	9.50291073319813	9.91815872495064
23070113	9.92816764470636	10.0922529818735	10.1608560204558	9.91148364598758	10.261147380715	10.3043464088464	10.2495509871055	9.91242026774505	9.95146374714025	9.96483320120605	10.0577073713896	9.83229456033437	9.79122315786381	9.95855330786722	9.97474121236889	9.93206111106015
23070114	6.08436908784817	6.55017691114874	6.38166598824087	6.41383678983453	5.86015626965644	6.2699499405104	6.1087071094015	6.37828825395474	6.58229766249444	6.32372276199578	6.1177764126191	6.53602666571508	5.61690022132831	5.66901375724873	6.14545352038029	6.17261638061368
23070115	8.53471679347029	8.896696023929	8.56404972850434	8.4534826772215	9.19843625364437	9.22839051676295	9.11928201967699	8.91371854303913	8.59516886899832	8.67895640390908	8.60274652699886	8.4495130525519	8.56918001201992	8.56689287732389	8.48778497229306	8.56368699944702
23070116	10.2642566988859	10.2411144627219	10.1694011522463	10.2201601740758	10.2685420556248	10.5327634355666	10.2896032338081	10.3250248517491	10.143667539213	10.1869155742921	10.2096189928079	10.1812510818755	10.0457766711592	10.1247083084016	10.2495772952491	10.1733122329604
23070117	9.31932177063332	8.97865517258285	9.37061515309169	9.34420190708275	9.72468360897761	9.23151747165616	10.1158211181588	9.82329126154949	9.15624816618515	8.99114401290639	9.24715438244233	9.28076599292432	9.06717633366296	9.1879355616954	9.48783806718412	9.22907422093042
23070118	6.65281399185469	6.81208570982928	7.15138470838938	6.64392273709091	7.3331264145766	7.40724089032544	7.55148213900622	7.23745286768651	6.85626294435408	7.09292309459669	6.95407594142133	7.11047365665126	7.33319180919723	7.03616548638157	7.03287411399936	6.7136637431435
23070119	8.69688494811232	8.57297146223319	8.80916179344802	8.66294445807569	9.00270487593889	8.46766040096023	9.11654213671946	9.01698486270142	8.69387970092495	8.66974727286267	8.60350891164256	8.71204564978019	8.4103919068084	8.45632602276667	8.66887702835711	8.74000140070966
23070120	10.5256135004816	10.3774127090466	10.3228733693853	10.3391989153163	10.9997071390213	10.8359710332626	10.9785963283894	10.6638044330922	10.55257832904	10.0815113237136	10.289770561476	10.3858354266716	10.2749979067953	10.3500157173636	10.1941656690878	10.3182532683363
23070121	7.5100157839249	7.07254961297714	7.30406973011136	7.33153614556289	7.44080395469731	7.14972607959355	7.58857474240137	7.36308848025366	7.59349640488505	6.83394195315294	7.41205084730185	7.60352137321989	7.42576893749766	7.42901858484773	7.43307161161657	7.41432783883001
23070122	9.07033133420654	9.0602066477213	9.1825015677902	9.11908736602506	9.64930571064221	9.77930492331022	9.26289257823168	10.0647512427508	9.07004147815106	9.22312011196306	9.21740429673678	9.14284436327893	8.97079828045705	9.14362736193338	8.61349348457852	9.20744327233477
23070123	8.59464678559129	8.68244395950489	8.72527903389051	8.44666645802268	9.30833665812735	9.35936952790311	8.56877039528559	9.54259894095015	8.43635254950839	8.64232410666729	8.69214401524318	8.6118781880458	8.69531170857886	8.5371669812158	8.13145804202123	8.6266351466055
23070124	7.49856170325271	6.9933187115721	7.41583167256646	6.6788212228711	7.30490899443605	7.14382385331563	7.63090084256263	7.40611704470502	7.13934660831089	7.1093543498826	7.28601073037499	7.07683212030619	7.08070767363766	6.95567970032245	7.10513233411173	6.79795181682864
23070125	6.36875170979932	6.04527867697595	6.39748471277406	6.07266666735784	6.22698061099206	6.17100645106272	6.63669486060151	6.18537032001325	6.52069071416289	5.9923322918188	6.35505424186374	6.09871340035262	6.13808547542022	5.64927082653934	6.22200599051133	6.04308624952408
23070126	6.52426788975608	7.00377467302474	6.86506104431692	7.02295469934223	7.14043265185893	7.35494054053206	7.18642240130806	7.16943779520718	7.1195208282072	6.87629117680787	6.87031701574655	6.91607957902302	7.01061086180427	6.70382473509154	6.85624364286025	6.69626103122671
23070127	6.03218964082443	5.76243298319737	6.44336761431083	5.91918849927428	6.49263719460875	6.75817280455668	6.41238607079518	6.24811678381356	6.19533176647966	6.10657923430577	6.3254793017912	6.0165059919134	6.2764855703016	6.3487421496878	6.32823107140756	5.63132654468935
23070128	7.34280357665764	6.8992898252649	7.22858435128101	7.12790645932491	7.14123937086208	6.96452158671488	7.35436331372192	7.5698163012783	7.21373716087251	6.97979241402747	7.26948198849058	7.115119028136	7.18321887099564	6.99016237151126	7.59553835529321	6.99805252207521
23070129	7.98631141300638	7.90835449016144	7.90826054709765	7.62551794954564	7.97504785700347	7.89590842702488	8.62445347627385	7.99014815850078	7.87113341815003	7.59446492372105	7.9178620478087	7.77811486790384	7.93961596626425	7.84926701873895	7.98541993043124	7.94746970635712
23070130	6.76755375532812	7.07052363935722	6.86746451632473	6.77275676646879	6.6769591623738	6.71419333469855	6.98459376072886	6.8688289627195	6.74409347857383	6.72262568830966	7.09070280361965	6.60297809318391	7.24900660399989	6.58072974632589	6.55230815066807	6.69998417292279
23070131	7.61030991981013	7.43296360890623	7.64725213599529	7.05780674520686	7.61748392247059	7.65987897252617	7.56804480078415	7.53470973502172	7.37773480680984	7.075877261495	7.56745709033749	7.36927994132302	7.34949378758557	7.36371722559607	7.41833098630101	7.49930606840933
23070132	5.3935932371107	5.36211539023322	5.53411885050217	5.3306087200605	5.47578136900886	5.74506813410599	5.68928177336079	5.77653899584244	5.41197491896529	5.50460399151826	5.50868489900665	5.7290312082396	5.48611696742257	5.45877080863523	5.61410487491419	5.36383775643429
23070133	6.57763089722982	6.51880179332372	6.71509939618374	6.19453365674405	6.48611417278188	6.73646510930528	7.18069682749877	6.98494194163455	6.71718170395883	6.56854203842645	6.33827193944264	6.45161363540125	6.51862977984476	6.18981930342416	6.96091360902629	6.33118421161243
23070134	6.48800278962653	7.16894644049211	7.44863204292341	6.87641488751801	6.97391097383316	7.55191954179843	7.6540585007366	6.97786334337639	7.01072500601295	6.79175076257964	6.76194068787368	7.25616198183671	6.88465068725889	6.73134895778489	7.11509123917645	6.9297437821596
23070135	5.92007087255695	5.80051031405453	5.88394562615355	5.81536441667646	6.2350664197062	5.97397299133015	6.21249714354517	5.64342863936595	5.68736195672913	6.11607672917632	5.92631347338229	6.21903783663668	6.05136262838013	5.87644136915952	6.02984595023984	5.95794651156862
23070136	5.01493464052699	5.20663077734926	5.00077660173367	5.24601045325642	5.5197060595073	4.89307378040215	5.37920024094269	4.84445126092605	4.95763550358462	4.98991501761214	5.30987850099493	5.20449295325245	5.1403431082	5.05767021168992	5.00710861522708	5.00563856271943
23070137	5.20857922526699	5.3548651373234	5.10823427567334	5.2451231094723	5.55179063287514	5.22648485959251	5.36489695474306	5.32660228425626	5.38632381630726	5.27146192935889	5.15721477951086	5.20923573387054	5.04285222659972	5.1783222748611	5.24423992421696	5.19744917425461
23070138	4.59319427161262	5.17428229523153	4.52638795832108	4.35564110904795	4.32323985263967	4.66908866231613	4.25326397350082	4.60851697743278	4.7456544814008	4.39554280382282	4.54296038594917	4.73642545534261	4.74960289484704	4.3317404701	4.61292994903476	4.5625779341441
23070139	5.61124851168855	5.5496746999509	5.78095883219166	5.82924624929391	5.8544856836942	5.72737648023401	5.8766846449556	5.77246903437425	5.86014000603291	5.90703819494508	5.67732960437423	5.75142805310642	5.90769883429541	5.89104048278909	5.85765058475375	5.65478327736091
23070140	4.56379276286291	4.52870536366348	4.61787081820974	4.6782527843877	5.04895710432659	4.52533492606342	4.7652102537077	4.76475303143872	4.71183911298346	4.74542581854796	4.81044587880319	4.75014557755305	4.77328516412048	4.47390428599149	4.67510755921809	4.72771258300743
23070141	5.34262283287623	4.93200144805546	5.32043793501896	5.11368684319529	5.7816679367886	5.85351755823165	6.02195731465893	6.02882458009572	5.1228786395624	5.60191900371036	5.23303851886235	5.06302593324936	5.01995337545746	5.3573109499037	5.51910512416951	5.04537633662407
23070142	5.76689282526397	5.62484183393295	5.75834072810578	5.7580856277592	5.59536507099545	6.03116111624604	5.8276996888268	5.66753781142707	5.59858576984238	5.52600154165839	5.31837135654297	5.82122058210793	5.95618802916557	5.44879270276711	5.810569715524	5.53114996271752
23070143	4.12150250858901	4.26230531851985	4.14542273884481	4.54961856494542	4.75124480056397	4.67468638322121	4.25088733025508	4.5176973150358	4.32927798751019	4.09124250576274	4.52378957540744	4.49562021837311	4.39375575412004	4.21813167576326	4.12119099027097	4.30300395842687
23070144	3.9595833726094	3.91442675283226	3.55174442524039	4.25112818949492	3.88328837716684	4.3258554098117	3.73446749483519	3.82989389243376	3.59276767670617	3.69203810363372	3.80912008074482	3.56672912444693	3.58594016753921	4.16049865391939	3.73317367017977	3.52793222525436
23070145	4.32809375483007	4.48608726152939	4.33942919162004	4.70300980311423	4.50059615372691	4.42770699094235	4.33294418726256	4.43561068265652	4.08389288847182	4.34399296097809	3.99379020642518	4.41659654748427	4.30399445829078	4.46145348420629	4.19974515980273	4.55438225397252
23070146	7.14688242562417	6.74897621539976	7.1497148976802	7.09278769209149	6.91809288897109	6.89295922910439	6.77554414685632	6.7213481116878	7.06981635360949	7.02875266550052	7.09730619908096	7.07490514119256	7.03390300311384	6.80735277184861	6.95415021478372	6.82504593321573
23070147	4.59976961025536	4.35171339366422	4.60755514862961	4.58801613972199	3.99316711786774	4.54049192324247	4.81222569369557	4.33930102651206	4.27103370453967	4.65829088110716	4.25727331345606	4.7878886728783	4.56721299622158	4.7437831223914	4.78548436818552	4.4653377238252
23070148	5.51825894052513	5.85866194569559	5.37391767880499	5.39142992432121	5.88113570194093	5.79402305148332	5.79696475201813	5.41152517371892	5.66145174703374	5.89143447038834	5.41239490975721	5.85532172401633	5.59808201341785	5.41428307113607	5.84002807497993	5.59379052655882
23070149	4.61354413550831	5.61539509106391	5.11207312433672	4.81310144468457	4.95286762052243	5.28670611860451	5.5472091876832	5.33506421417739	5.31184426863081	5.25463622761475	5.40427435372524	5.17786249952883	4.79750952001608	5.08535594075916	5.58379686018336	4.6575374539904
23070150	8.52013462604887	8.29748363780469	8.3595872557505	8.37580115539026	8.63714881204593	8.59547756515965	9.12876927128519	8.93756511210504	8.02668227885198	8.26951447844778	8.50865031162154	8.61444884226928	8.23993888651775	8.15845755140521	8.16472066816154	8.09961335130278
23070151	7.05070341145599	7.22957776843732	6.94886448610774	6.95581671028677	7.5567188377748	7.23573295904013	7.76969680354104	7.03858120377658	7.07071454423319	7.26252436384236	7.21598222997776	7.47884536737157	7.34006467966364	7.33872487999338	7.20311630965023	7.09883691191762
23070152	7.28462162265116	7.44545246377133	7.61880129570771	7.41877650043215	7.42743694159193	7.32925308812941	7.93186320287809	7.52096367570105	7.56941914002668	7.63854882862442	7.53199799485333	7.76845352486234	7.73575642936054	7.39507701306308	7.7124902977423	7.55068796259036
23070153	7.86297612607042	7.9220633684632	8.10814273484391	7.97937157102711	8.32378191196428	8.19657336322795	8.69930406981357	8.32501187847559	8.03661419223968	7.87833745208932	7.96533666538246	8.18394392405651	8.02959808745955	7.96974765360911	7.89354133566876	7.99019187921465
23070154	6.07345751292486	6.05114156654553	6.52371845403857	6.51095953885954	7.14534322084121	6.49760420867959	6.67467540135556	6.66528076119616	6.09452183958445	6.30280129296878	6.04041837647035	6.49564869111368	5.88378118996518	6.28029003076405	6.22769919661414	5.85510938450352
23070155	4.86128280824591	4.63814924496236	4.61569080875139	4.27548107278399	4.55124982785134	4.63942267304364	5.00217195278166	4.62572737659304	4.42953343253505	4.4763213588534	4.63175952551279	4.88199820422125	5.15139012501213	4.68389529383083	5.12637193843024	4.34452237689591
23070156	6.97817272942883	6.77595781642109	6.71056310731253	6.83744193672341	6.9587363262826	7.44643113463726	7.2345044520483	7.21332627169159	7.01510678490797	6.45792123084676	6.76192989369875	6.68904386695767	6.71529798868936	6.86305926453213	6.76745963511341	6.83014675307525
23070157	6.0532685193632	6.28321474583387	6.05066320758574	5.9994718733147	5.9139109662496	5.95658607307683	6.27103607092811	6.33658744184859	5.9930366070963	5.60042807854434	6.14748284344528	6.53340152646084	6.11693476893294	5.66677924674985	5.89142063264306	5.97135688781986
23070158	4.15153277514595	4.91366407564126	4.7015755916526	4.8127462302901	4.51468676820466	4.3078772073125	5.09182048238246	4.73068396273419	4.49971634034801	4.9595421196998	4.18074228333001	4.52823383385864	4.96239499833337	4.02372014262267	4.63010491556923	4.44787773641642
23070159	7.10331598734249	7.29416825225068	7.10295658995635	6.84202645430123	6.96732778376178	6.96805867229328	7.1909050552607	7.04872285850699	6.67339039837051	7.01775151727788	6.86779737238594	6.9798596872054	7.12858046960588	6.97797672211163	6.7547990666665	6.94776972678453
23070160	3.92131669958794	3.91311159933094	3.90826222747618	3.63866681294061	3.86155224923944	4.21996080201589	3.6806480498105	3.59751329560204	3.70548183162261	3.84984764670542	3.82981738440879	4.29058845266038	3.87390819763209	4.02492818548786	4.21785687514046	3.88427286517771
23070161	5.08714488237545	4.85435396943596	5.07290041545189	4.95114146525572	5.21016378316904	4.92238047794252	5.45937507724754	4.99569003828392	4.88069780421513	4.80848797151439	4.82949659842856	5.27054177846061	5.07295461894269	5.34453712263464	4.91746690429284	4.88908397268215
23070162	7.04036800381033	7.28686972516775	6.84708216113928	6.80849429164696	7.07934399192803	7.53515916808189	7.36844196942142	6.99299873202537	6.90043474226309	7.20619872913377	6.68822299100751	6.87729861381584	6.51791139188722	6.86966275866858	6.94760102327378	7.01697532144084
23070163	5.04250126675799	4.6410073638178	4.26642984484033	4.71458954036572	4.78235678245697	4.5564761062174	4.96836056382437	4.6259073653473	4.27501218061441	4.28660604460645	4.39849692874484	4.50641059309119	4.62005917985129	4.85689937111613	4.23602567530279	4.40906195216387
23070164	7.37436758285751	7.36400131109759	7.62610118560478	7.4956257052469	7.61804156792199	7.98498630337494	8.84077590333036	7.73267598581525	7.63512251598964	7.49308804444276	7.35575715688265	7.5617246806127	7.71503330762626	7.58134863007707	7.46853545571348	7.66840167689182
23070165	8.40704815578266	8.56532975219997	8.90885830635084	8.51317403735253	8.75931442694712	8.98800639525074	9.55722984810638	8.76893692743291	8.68590410078488	8.70062297919335	8.8428647059931	9.2092484126906	8.87974095596467	8.75873759659436	8.77435840206286	8.87248352244406
23070166	7.32950420828309	7.41560615723649	7.69260087196513	7.52973365790239	7.14682212192106	7.41528784328224	8.02847947140349	7.66221096541304	7.41425826490442	7.35615458206946	7.4340940181432	7.59530556336996	7.57341406441018	7.70870391335919	7.63379892592251	7.57076883490933
23070167	4.85018864713509	4.88983910281379	4.69687358199283	4.88548635216799	5.57782492433726	5.95346968406197	4.95190395048236	5.15341625010053	5.14018591320082	4.96689233354157	4.81705004447483	4.62004736643107	4.83038340514653	5.03403889529021	5.036331474041	5.14011183755487
23070168	4.44039995274755	4.6114374898356	4.41795977880435	4.38082968720879	4.5146723507273	4.65996486976539	5.08404807907476	4.57011948997812	4.62083725973549	4.3457956732362	4.32137684812823	4.60781320030514	4.4164118687004	4.51194527414195	4.59343793772363	4.42948041894537
23070169	5.00570982348213	5.23237384067497	5.22622366614926	5.18730810925446	5.65093732049239	5.29342493901161	5.48492777639421	5.21024670382097	5.33139240702754	5.30186184129655	5.02177966357601	5.27177189358234	5.166663826517	5.57801622442488	5.4026572459694	5.23978644290569
23070170	5.60042389208229	5.91634641629665	5.81157456244511	5.81851690610811	6.17523752412571	5.78830206748418	5.86432806562907	5.5897259714445	5.70581924851951	5.86423099704791	5.8525976949998	5.92542861810363	5.67156274176371	5.51406497813633	5.82642588352282	5.80093374795932
23070171	10.1033922412696	10.0180289493355	10.4041477318985	10.1234379541228	10.4391839301419	10.3607704949181	10.8059259007019	10.3669344303616	10.403234367908	9.96991946983556	10.2954267071197	10.3166704311583	10.3002900925215	10.1825207729762	10.3859387815709	10.2100301538885
23070172	3.95959326910987	3.85101301254645	4.16453452135558	4.17871117462119	4.06241074458251	4.13821380087014	4.04465578126249	4.3582389961085	3.97937330287398	3.98287362583109	4.14738578152841	4.45656007643892	4.40793437113634	4.23357636847582	4.5354153551155	4.03642340718393
23070173	5.16284080820653	5.2481686296665	5.0005227203669	5.15009146058581	5.57708393896717	5.56123928072057	5.59439723533465	5.51532378785591	5.11030735348908	5.21320870340447	5.515291821175	5.2354266953914	5.48409537862202	5.16802189811608	5.37838784276808	5.57630574594168
23070174	5.09508409152576	5.35526241894787	5.96807922083955	5.56169423022533	5.60113304337959	6.13408728623901	4.95307576417073	5.64731963030442	5.25880606941537	5.87188322567294	5.79815522728763	5.53173480827889	5.72194026397267	5.21863717576008	5.23211342497263	4.85507270381468
23070175	4.3529207877881	3.95758388680026	4.09823662663125	4.23463331368524	4.25567899909532	4.07405113396678	4.14829365290512	4.28688159174466	4.34185222398527	4.22941423488785	3.75473481332476	3.86872792507314	3.88793791153108	4.1948384697543	3.96635825967754	3.87812352541453
23070176	4.28987490891573	4.76274701590681	4.35518082098497	4.71230498408846	4.87865329479932	4.98369651165172	4.60613660213528	4.91535805610564	4.43210850515618	4.53247106591269	4.51403288426359	4.48060401251229	4.14388374066348	4.72951884001084	4.45540011656206	4.51396010675872
23070177	3.99097812619018	3.95477950641706	4.09911411875258	4.19134999278409	4.02983055790793	4.00469110317919	3.93304330329055	4.09585544531491	4.21670472902234	4.05145278461889	4.01054769166694	4.01902138066236	4.09485683353865	3.73568648794684	3.82789498284732	3.91474961383632
23070178	6.6456034235629	6.34850334048917	7.02420567872774	6.69748263998769	6.447518486419	6.45448325617988	7.0339561340616	6.77984178442829	6.36249085548747	6.78432117412661	6.21465703416203	6.61226820193277	6.71411218010813	6.21978829214714	6.38492381652033	6.61899292627216
23070179	3.74248680399113	3.56358082887774	3.55197832240321	3.87717695976048	3.87209988328159	3.68053783005566	3.8345237491689	3.71436005113632	3.63773752765457	3.59299290880588	3.6928414674449	3.61055684071656	3.72892045512902	3.84424913930926	3.75934074121279	3.68238364699273
23070180	6.42023220591951	6.16838746201502	6.54571595408055	6.30468792636582	6.35345777767429	6.49072076882601	6.56347626229911	6.30613739060214	6.16574838316116	6.30042737782816	6.16981739675456	6.41442808474262	6.31328595170171	6.01244814868425	6.07173532290111	6.12832616788295
23070181	8.09591580606302	8.08902359617276	8.98061518628354	8.45168784301533	8.67101144646939	8.56315046486138	9.05947475778263	8.59656244650984	8.57762833688776	8.61868517441485	8.42684244936079	8.70392258182333	8.82186861341983	8.39207109905764	8.4743007999678	8.39718687102259
23070182	6.04378373100759	5.95777014629028	6.12210925456231	6.40489898983099	6.42242392213903	6.40939371143685	6.63336348843352	6.61206523850197	6.38160865670913	6.3389155072181	6.18224539329169	6.09682294804113	6.55908487981251	6.1836370928282	6.21938085354405	6.26901341861119
23070183	4.32513141718162	4.32471945643133	4.56725031205942	4.5621024275167	4.81035966801948	5.25652865293657	5.0684119774485	4.82171592810893	4.51202583612369	5.23438895963571	4.73188212058805	4.7591554248389	4.63257938824489	4.79696205949822	5.09368960032995	4.63815672451033
23070184	4.26659290399629	4.28632768694236	4.54008014588747	4.66573199997663	4.22611754277559	4.76125879564695	4.19735392083995	4.62482694057996	4.50828334570896	4.48934155684564	4.51600093495987	4.6273178847902	4.61272273125764	4.99034667099368	4.40281973346269	4.43425471431069
23070185	4.22081280193936	5.1503216727251	4.89612655530433	5.00794279469566	5.38376359159276	5.53555991075587	5.13828305887311	5.41198804639187	5.18148249511223	4.85662453278728	5.1039475653248	5.42452534500414	5.25107333608472	5.25392504090092	5.32905070681443	4.88862990198939
23070186	5.644442251624	5.0300272782642	6.00707410796856	6.07310043760643	6.05465366542829	6.15962475185753	6.40585908491329	6.12050251431009	5.88052458637294	5.96948043742709	5.80695189956166	5.86014981768151	5.8156843948144	5.52270378521779	5.93390193034542	5.51060623446
23070187	7.99169518583226	8.16512535122825	8.24557399752497	7.98526018873882	8.23858693046822	8.46942459107174	8.29729399486144	8.3507529176422	8.05938399389333	8.08168707377393	7.78952333291235	8.27755793007513	8.1731345014901	7.74191982651431	7.3414254558083	8.19917393131653
23070188	5.87173725138346	6.47604944813353	6.33982801207744	6.31844375145415	6.18240958785038	6.54149090932196	6.21965412837862	6.73222253257847	6.60294569119727	6.59535801923579	6.33395629442605	6.37739488619757	6.49159470349349	6.57273223520745	6.42472734471817	6.26971728811521
23070189	5.08254139018106	5.16404183427281	4.80356287214898	5.05048129884466	4.76409785489858	4.6662327435356	5.24549503766202	5.13292492043253	4.98834245230931	5.15533734665954	4.86503527589717	4.7937731298603	4.851294047207	5.34198101633329	5.06102707774995	4.83783124886825
23070190	3.95833985948286	4.45929269506734	4.19457680490484	4.45894508389004	4.64219121756914	4.65592283866771	4.50070252744281	4.84184098663754	4.24257548351075	4.28164727337941	4.377085729014	4.17494130343282	4.4332369486421	4.22235977739317	4.5410682591733	3.99591433646072
23070191	9.40213922027868	9.60480632612914	9.8013155515696	9.5316742359398	9.48323318389633	9.41904441425645	9.73360559861285	9.65816986165133	9.61623992835151	9.60150691192334	9.58786725108436	9.79905648911778	9.72018722564899	9.33246717631662	9.76020024412641	9.61689859362303
23070192	6.24417497146452	6.34871279957723	6.81426015394823	5.990415249133	6.53560333306475	6.33735965746836	7.14471158978079	6.5871595518575	6.43039110397201	6.33014605116898	6.32998287086937	6.67165759964458	6.52719827581122	6.37233041465242	6.33020653546762	6.44411535669827
23070193	4.44644415232688	4.40033431100892	4.30453994821708	4.60670846231328	4.8915363880116	4.57671400787707	4.2638933462099	4.58696414511918	4.6384817979729	4.99064795036543	4.48846317850929	4.6926468295543	4.39325093310168	4.48932466507496	4.36122265597312	4.59680572279986
23070194	6.66970675947226	6.63460533730394	7.16438191001655	6.78274540956372	6.62252329013323	7.0515587200922	7.45003902727997	6.73814584667456	6.75847103888309	7.23087902156997	6.93298464662801	6.84922147386906	6.95355198817561	7.04967369169703	6.81243365808335	6.9259698099366
23070195	7.02907576964658	6.82157744718993	7.05904258580062	7.06001601739588	7.54495194447984	7.34527625778504	7.54136452681637	7.70429141429059	7.00078049168293	7.24231277873454	6.83458172068485	6.94636600307988	6.86021947514035	7.24441869479851	6.84904460445585	6.6818102751153
23070196	5.69976550473034	5.67338866010553	5.48845893003687	5.85515794084238	5.41621065266933	5.92562016607972	6.23958351467668	5.97217803433481	5.53670275421527	6.06639839333786	6.02796405966645	5.37504465007301	6.02813811559525	5.73881501312273	6.03427347442652	5.63428073987312
23070197	4.19206071515432	5.51958168157352	5.35166030106997	5.95737414142926	5.7780853041659	5.62758732814487	5.30591153619947	5.04018697494214	5.72532347709494	5.35964594469291	5.57297014064796	5.48500465615569	5.59567600920241	4.9361732713067	5.49623935614538	5.17746830310539
23070198	4.91453089086275	5.60462260437077	5.52654879051566	6.0217603738284	5.76190724056613	6.065422461037	5.55853072263262	5.75465714370243	5.61139194718117	5.80175415727331	5.65969626444494	5.58237222750149	5.53466178068102	5.94010134280952	5.5896210751114	5.38236861926124
23070199	8.59731546946128	8.61103813792995	8.51751438989392	8.49433105128396	8.74813195997491	8.7711174040896	8.64094296851411	8.8945633266525	8.66103802472454	8.46422165552903	8.56424039140855	8.69631346044118	8.46050132951463	8.62902560914702	8.66276045473506	8.22842922506118
23070200	10.4707487435829	10.6814033953748	10.4874055465565	10.6870217381034	9.72473596434589	10.0323919109205	9.50530888216612	9.74928649988753	10.5458942274213	10.7413534561393	10.6682355100153	10.5266424024478	10.4592840146915	10.6014328440728	10.6238718336542	10.6935592786659
23070201	10.4036694625689	10.7764956738369	10.0520493588943	10.3579663189129	9.87231815701628	10.3829871581944	9.33760863504505	9.80898315509923	10.6294091023869	10.658382062273	10.4739154773004	10.4339660752685	10.8656959252241	10.8136865819266	10.2244914412352	10.4730989068842
23070202	10.4838423684485	10.2472289882243	10.624203373124	10.4629204732373	10.0756332673482	10.0335412932431	10.2598864899504	10.1468724225549	10.5454163942577	10.2234484195283	10.5306169712275	10.2883827877435	10.4218781751598	10.2802307103513	10.5637403610481	10.2544647496711
23070203	9.4400349597324	9.30592307473188	9.30018390226642	9.6610251652958	9.10530978698733	8.98066033810971	8.93524563590295	8.84523562181463	9.38890045834683	9.10234660395558	9.34084933686281	9.07618861009796	9.20688607021309	9.18234694674522	9.53239055206779	9.31323400136926
23070204	8.37807648075626	8.65397195158167	8.22755791040928	8.34609324607575	8.08509837031385	8.25572341394865	8.31628776585619	7.82516234049844	8.40770190113197	8.34524589757955	8.25299226633017	8.12811919428614	8.30699265125297	8.50186534600497	8.18853785591837	8.33500631109711
23070205	7.86314069194642	7.20349221156959	7.78551924654739	7.49741617599552	7.80571057781976	7.39669539612412	7.9893263038911	7.60997147075199	7.19449556594585	7.33816847004193	7.74079544705193	7.64842586982289	7.60228757243972	7.25831434491367	7.93855047923953	7.57628690250366
23070206	11.8965035613989	12.0507061291726	11.963332581123	11.9148943313319	10.6344031517837	10.3841195527043	10.0213089553232	10.6413513288794	12.015427576089	12.1146734714284	12.1423568554841	12.0066610219745	11.9769600436315	12.1116462085114	12.0107551516111	12.068882388545
23070207	5.07569021390067	4.73401370153848	5.22205624225254	4.80284089853504	4.61887076492851	4.57404448982233	4.6290670148666	4.72042556207876	4.9283824471084	4.65831474121994	4.85866507297641	4.61814524746259	4.62523895943639	5.15404062487683	4.82508343244549	4.90644531757506
23070208	9.2016861140015	8.91624945058115	8.81781984723172	9.18303787036061	8.79402999928232	9.13467383908218	8.8965280434641	9.09598345274327	9.00557928723575	9.03203880493386	8.77848040241485	9.03405260746888	9.04848280073286	9.09727610053278	8.706035096893	9.0626226794737
23070209	9.68230684080224	9.94799023379826	9.91217645399543	9.85026981939849	8.78764576530621	9.13936056883968	9.25700130555218	9.10004942374226	9.68882583619258	9.94042306996882	9.96795617902107	9.72086136438811	9.63306136929448	9.94388362155877	9.98890947646346	9.93133746168516
23070210	10.5534165088464	10.626200815253	10.3825623890405	10.5125388625409	10.9680873011414	10.9743260004352	10.8607555917758	11.063902789647	10.6510607157059	10.6036769498635	10.5212913820829	10.7080605834818	10.5059778152114	10.6552462376767	10.6974567890891	10.4173604386784
23070211	10.6120332403618	10.6671432983161	10.5861467007296	10.6306376792504	10.1212506190989	10.5115285528906	10.093296105384	10.2224458703338	10.4672260672409	10.6483930994843	10.6121311603646	10.4060613121095	10.491552608252	10.7314989632472	10.5396630811654	10.6276238912189
23070212	9.2113055030874	9.18922366276343	9.34480665434272	9.44671955755719	10.08797306611	9.79648843354065	9.78721859332489	9.95489808806751	9.41235450418261	9.09039876239907	9.26091502673668	9.26963585323725	9.18232390203389	9.39185565550454	9.34332140217645	9.3286760266914
23070213	7.47456633010349	7.37867768893994	7.71276502916124	7.47269169161295	7.80639621976734	7.79086940312061	7.85819634070775	7.82230233068538	7.37526681841076	7.10117444525004	7.57715350259307	7.48348716936145	7.47993259940932	7.23756261409492	7.50104020736232	7.35990939431839
23070214	9.18485120829732	9.1613891855224	8.9783591065396	9.17354744949676	9.66676193501878	9.67256002250003	9.46186388220397	9.34199302435061	9.00391589757645	9.24443767401815	8.90398669242888	9.12363131546273	8.93614079820537	8.94209223817407	8.84402637985591	8.96331461101383
23070215	9.57808089290484	9.63502834931623	9.41777128658736	9.63576047719185	8.77574985957366	9.0468801091714	9.49053785831076	8.85866865159361	9.35347517070682	9.5314521761466	9.46883954195645	9.48116996387272	9.47356389307708	9.52804456956344	9.33913154330378	9.42772186682672
23070216	11.9677843094424	12.1826425236287	11.8484606406275	12.1407469042098	10.0642530863079	10.3150528552606	9.97970773748112	10.2230885537086	11.9106419005367	12.1033798490744	12.0604818489487	12.1510615833853	11.9996049020831	12.1148486781599	11.9524033226384	12.1221753212039
23070217	5.02843331512539	5.04683909074069	5.18068591662693	4.71637030051429	5.34732620674968	4.71157053657462	5.54921357526045	5.29330316280024	4.83889574837093	5.50827575869404	4.5549697581061	5.39167813652901	5.05711056209758	5.08496525822432	5.01895039593058	5.06086038440448
23070218	4.5299327016526	4.57906540085934	4.7236186216774	4.62962036135989	4.84612645370619	4.68491143632532	4.84114344074281	4.50085613453893	4.42020746230445	4.47719540313778	4.24670749465583	4.69999241323401	4.72391872940721	4.65235827208255	4.62526489963535	4.43356039149098
23070219	6.95155125233521	6.98642086646955	7.16667132789941	7.29472504947617	7.38499771252819	7.57188690283823	7.94306115501209	7.07744197916965	6.74162637449514	6.92356438109373	6.98673931422741	7.41762349933832	7.14357692184113	7.08363970476622	6.84796856648073	7.26341898508712
23070220	8.43186819201994	7.83580149842741	8.14229495013042	8.33778138308499	8.10022550309975	7.49220607658329	7.94460444508471	7.80363926401818	8.25482730413954	7.78474250080466	8.09093922979945	8.17008900361196	8.19191676847734	7.86533130989641	8.18769989548916	7.86675910534988
23070221	5.21164005192681	5.30183842378716	5.23954118860081	5.0882980734611	5.40135031417097	5.24448947892825	5.51640743359117	5.41872688278549	4.95963935301487	5.02597708465523	4.880000860225	5.37851848084035	5.17392162900716	5.19633534787626	5.0850989312076	4.97608922853522
23070222	5.88338523437123	5.93374164435683	6.20537261083268	5.91026269163934	5.99304262924791	6.48522250913268	6.60842636785677	6.06357356088896	6.03251983704129	6.20564355500335	6.32263686337224	6.050768048165	6.43392810174528	5.77384079476118	5.91618430419983	5.70559593904666
23070223	5.91608178928322	6.30242313596275	5.7643960591944	5.80783620148391	6.80092692242067	6.29670602355021	6.38277042434904	6.57586130866875	5.98581323657025	5.62579640308252	5.57325660863186	6.04536494637134	5.71641948838724	6.06539103651373	6.0439159705372	5.54241137527931
23070224	6.22516689797723	6.2418169702593	6.68294362873122	6.60108461681523	6.50923934503389	6.29128188346487	6.58280159573424	6.23394996878383	6.49523338248948	6.33106217626264	6.49637625856931	6.40877947721815	6.7589207742998	6.51953084591151	6.57438901141929	6.5124075573449
23070225	6.69052884838542	6.76753849821931	6.9837357519477	6.41325305656333	6.7881979645319	7.24524033952818	6.82188044551488	6.88076670208429	6.79252920351436	6.91391362920532	6.52618502060999	6.98028183608005	6.5867548292139	7.01605574698606	6.88500220513401	6.8349560654719
23070226	9.29362298363475	9.81966804563488	8.86953142852947	9.40822382126124	9.69047977457076	9.9393373023102	9.32742725978302	9.58933549371664	9.41606391349841	9.60387996586866	9.21354022839148	9.29564976487327	9.21497991371317	9.42771327001798	9.17577072814426	9.19982911091026
23070227	5.6990170127765	5.56328278048869	5.82836005767733	5.67618986830637	6.34519753415319	6.57824021365587	6.23792001649513	6.3129876747248	5.51249678990318	6.09102218116114	5.55844826750588	6.08442129911698	5.97420066782855	5.53672855986164	5.71865498442716	5.73172800842266
23070228	7.18945687203608	7.19780165688787	6.94741239445577	6.89442926739562	6.97221914345028	7.11568194138868	7.02019285417387	7.15655910976802	7.03332309318701	7.30359852072654	6.9204816295573	6.77314809269858	7.21347642645704	7.18305751015991	6.88020557601729	6.82167495680604
23070229	9.94841471444489	10.1031613200365	9.79678738813432	9.79726731065701	10.3925135492179	10.2466553638994	10.4803400398864	10.0028073462129	9.99219353587648	9.96025679289424	9.89673179009515	9.58402641420546	9.49896533401112	9.67304624673137	10.005519643382	10.0372067935012
23070230	9.55775099354075	9.61163380258366	9.65329482666384	9.4093596328215	9.99471357622284	10.0276566162474	9.8926182889071	9.95537689406064	9.63391195002685	9.41427648946352	9.55658894614058	9.54924338007296	9.45089073226828	9.62579846727428	9.68987330202945	9.32097578206758
23070231	9.65835874545978	10.0039865760914	9.99438556621044	9.91695498149277	10.2999056055961	10.5838634983789	10.292995902924	10.6144843550299	9.71198649744096	9.95284122973508	10.0050694861236	9.80876609607753	9.69238723174741	9.99725798599288	10.1305310512539	9.96825043546321
23070232	11.4252327544719	11.5421472078438	11.4339570788369	11.3966045012774	11.9472858589247	12.1156828739815	11.8550483317131	12.0792345380398	11.3483180579497	11.4913088739986	11.4257955323131	11.3006776944451	11.2932225797785	11.5279383199096	11.4185584903021	11.432100093324
23070233	5.93469958923915	6.26895887434526	6.07222908902262	6.14328530046956	6.42423047997416	6.51998706501346	6.53435922184549	6.25253415715372	5.39990181855761	4.91116720455921	5.80831626055213	5.89727451182945	5.96658583362526	5.48934803223977	6.29365733484093	6.24459523317854
23070234	7.74333610765891	7.72898383405016	7.99208719858337	7.83789697442977	7.72181628466306	8.03851145571392	8.2546117988636	8.34853220393666	7.88244737063844	8.04175593861216	7.89099846883378	7.95564695256381	8.13620106630167	7.99046047968439	7.73361842947834	7.95926188873861
23070235	10.1663348004845	10.4080688435978	10.0571230889696	10.0473448179069	10.5565038117016	10.6223167681676	10.4696167067422	10.5599381926004	10.2201745006808	10.3760276929905	10.320642957207	10.2012864383377	9.93653070765287	10.1075525053615	10.1789683730566	10.0789548505381
23070236	6.08649740684511	5.73221770682748	6.44588228720249	6.25524258651788	6.41844261356235	6.36945648640333	6.53789227056559	6.65469198782158	6.46855848723106	6.19999163986361	6.22629528288734	6.36805456340915	6.05189230438043	6.48910910139488	6.32756960570231	6.1336041968896
23070237	9.05368920021371	9.18338897181403	8.78168184791225	9.31312535543889	9.48095823279936	9.45269023061713	9.65455944396446	9.28046754615303	9.04486179183741	8.99007783075897	8.98903800482008	9.06247063758749	9.14368446542048	8.90199538730642	9.009731166954	9.01505453037239
23070238	7.0927233942492	7.12533653203601	7.1635314733661	7.13038289135554	7.63111356406068	7.37634505620323	7.47782758265393	7.53919787066156	7.20977605412625	6.90218589851391	6.98416979454995	6.8711081142558	7.23991541395637	7.29487966809824	7.15774243235967	7.2447531881401
23070239	9.71517114337211	9.737454165861	9.75216371529514	9.65945667464251	10.4455499226493	10.0673975631085	10.0016103422822	9.97649284618546	9.66635740151646	9.60205395309347	9.64791723821329	9.68971641320839	9.58190723932857	9.59802385080038	9.70829166683584	9.60954956043022
23070240	9.80367481086849	9.75578410547628	9.89973332892234	9.76506210704218	9.94959875945721	9.7610921105053	9.72451631016593	9.73756140886426	9.76323985533894	9.73231789403824	9.6692194104134	9.50336376886683	9.70555645920758	9.88868663709069	9.40964655056118	9.59961579218132
23070241	8.87997153374544	8.90838621449396	8.68838291076276	8.79889729453906	8.52478090819842	8.89451403730973	8.74260294318068	8.82026500623832	8.86802421722602	9.03842768878717	8.98752952554498	8.91907202247703	8.73616094751427	8.94822275657591	8.86834575913966	9.05371594434306
23070242	6.4093824768978	6.55128091678732	6.36668634629628	6.3749883754681	6.47584131547039	7.13411782903975	6.25705194135416	5.95487367439503	6.28655009265306	6.30588286314521	6.54540886057955	6.25628832829055	6.3370317350128	6.26478523431158	6.15692223491233	6.05094640801446
23070243	12.2259171382974	12.0449352749749	12.2497803255348	11.9991181024342	12.7769251332218	12.6146739475052	12.5204289505944	12.6919447324798	12.3067984346471	12.0994643120652	12.1907559024472	12.0943752614995	12.2705546022512	12.0435393281681	12.1799009197222	12.1582037683846
23070244	5.44377107375572	5.39232266454079	5.26177753328432	5.28964958260906	5.32953966427849	5.69658904258096	5.32650284204702	5.24919447137403	5.71497194611998	5.30450308787344	5.40687533262933	6.69397109446075	5.47217149490441	5.26867454187478	5.40384089600593	5.26243750760265
23070245	8.45118035763749	8.74325402233212	8.30907965249105	8.70627296042062	8.8101526345238	8.98143921610979	8.92168719268033	8.70475406911761	8.5256530374066	8.58934767115396	8.60394859658131	8.43169145698591	8.44571837163151	8.50042771536633	8.33709677546662	8.35251679242097
23070246	9.47033874947739	9.58357031907991	9.37096079369459	9.27703520954314	9.65457064756899	9.76563251857077	9.72320792507672	9.73690087831094	9.55287360019749	9.54677763562161	9.53496071047497	9.41250551500386	9.46755329735172	9.52699741822054	9.4081117832369	9.14024886273924
23070247	8.93798991969142	8.84713010857998	8.91848287481182	8.98305385737186	8.73609925827407	8.85488122259692	8.83739045060626	8.72002491550158	8.93737414347118	8.96046740190847	8.83181616699082	9.035914428919	9.09096731970227	8.98637917776807	8.92833536457438	8.87996074355965
23070248	7.92431517191967	8.14079393251728	8.09918599252989	8.12752319504949	8.35397689163351	8.27178747294322	8.84313969100295	8.17130599202183	7.96440102457376	8.16660984969269	7.99451314626436	8.2803562947091	8.1778187125071	7.96584503844062	8.00175083206667	7.97951267812807
23070249	7.20746143386583	7.31283757383556	7.14790957563196	7.1397979051645	7.2906309393605	6.81198161884359	6.98225188875415	7.24507834490626	7.33346183481729	7.38227958653275	7.7757846816638	7.43635705058673	7.07903098639232	7.78596156447166	7.66562863522319	7.50316849186872
23070250	6.86219679589839	6.90311294683698	6.99366724147718	6.59407747215325	7.0907342740726	7.07100538088648	7.33635364388192	6.83522194006428	6.60082645818727	7.08284305922835	6.36566207038583	7.12676308282197	6.93557771162706	6.84667841884858	6.46598054650781	6.81086948582438
23070251	7.7329731933266	7.65131571247063	7.75368398152666	7.47248802109014	7.71654562240389	7.76511566452642	7.91451472893253	7.83640386138707	7.56737994327508	7.70525317253851	7.56957381099107	7.91892353434266	7.7839613409959	7.84017444971362	7.61655586450829	7.88054587978669
23070252	7.55603735210723	7.21972425870675	7.30301700168823	7.56350627137603	7.36204185663323	7.06478558839597	7.3382680638465	7.15973126873858	7.81024941334234	6.98629814543272	7.42988898540564	7.91941593392834	7.63061711040567	7.05970788208862	7.68393184187958	7.72488578569062
23070253	6.50027451275716	6.4539490329138	6.50159255239528	6.50698405080587	6.79570034305029	6.57570161129892	6.64767676729024	6.36421981348691	6.37184021191904	6.11512731039825	6.54472313116892	6.26737426392021	6.59875570036807	6.52543412562002	6.88830246719478	6.39101131217944
23070254	5.4746905749968	5.52655769995431	5.32177125684757	5.15207946283633	5.28852609469825	5.66423888836655	5.44661080354811	5.28041985039201	5.6996666953408	5.22629975288103	5.30534587104488	5.8517591626991	5.44795012491602	5.59927158573732	4.830744427345	5.14135390567372
23070255	9.14641431199721	9.1099134394396	9.1205065749789	9.06829421062932	8.70774736946145	8.85638253160682	8.79359782453948	8.49045842662994	9.13989209830136	9.01321465937083	8.92615709601383	9.11225392856614	9.17405047563008	9.13278545206884	9.25221533141437	9.02028175179729
23070256	7.50626235414735	7.42980785831141	7.78713950205458	7.72443220809785	7.87508316996705	8.18274292518584	7.90984700393578	7.69791011127249	7.74231346889469	7.79890632997359	7.50105198660457	8.00402765262188	7.67193454702473	7.58995118158876	7.4752856387048	7.51056100296284
23070257	7.96263407637047	8.53642915265355	8.66363133199061	8.29782930258538	8.6312726116657	8.61078803016085	8.85723872041791	8.80063766516163	8.29221409555098	8.49292365427313	8.67024933427196	8.74543148570536	8.63537177401892	8.31962874472456	8.50972418310803	8.36795189923683
23070258	6.37424435423879	6.39142238746025	6.47488882238047	6.3358978221679	6.6394973279873	6.21643641081471	6.74613417612739	6.73036405138053	6.43264471613391	6.27752781179843	6.31454701972952	6.54504094339941	6.56441592149777	6.12176541732234	6.30612872267621	5.85777206412281
23070259	9.46443667140926	9.56903768580692	9.57511452992224	9.44796490875104	9.43760303256998	9.45172953262063	9.53472238723774	9.46707443673255	9.34474649602313	9.61588841819132	9.6037207697149	9.15805263789986	9.19288040842418	9.44607799205199	9.49448454354977	9.3926974706601
23070260	7.52405161847181	7.73147459394343	7.43187050576544	7.40854913457592	7.83406432276246	7.57352846968888	7.82980009132752	7.57009043795683	7.1918269290961	7.54442776324026	7.37381989578955	7.41818400754819	7.49110355954584	7.28886291215796	7.44237386111784	7.29821785737519
23070261	7.41142895583975	7.38441099183538	7.60409315546016	7.59501720259948	7.34547418623626	7.50746182751812	7.70078301431919	7.36786411149472	7.35681218462795	7.39140011960878	7.44846458575754	7.76788084555322	7.31827095098591	7.12738075989487	7.20203800427302	7.59062905595269
23070262	11.8657725194754	11.722033580108	12.1157057919097	11.794529939241	12.6339540598231	12.4592329865196	12.743114812246	12.4732528346864	11.8625886096024	11.7006975802661	11.7902066787365	11.7927963779425	11.5691712768721	11.6446972680053	11.9176034636913	11.7594894264327
23070263	8.43946878351329	8.12875301948077	8.47136662051079	8.05096475581056	8.94208478275332	8.67069380431862	8.75759090170114	8.49994723630869	8.29924737388884	8.18941564421369	8.35781699195587	8.50924458910942	8.43577307064608	8.21223676735202	8.13398246244694	8.12043098558155
23070264	5.90728959482482	6.21738127719242	5.99466332813206	5.58155743349452	6.63591742792656	5.84293641739225	6.47634085761873	6.20261556362195	6.2356979873561	5.78944765468099	5.57165124109948	5.73721167768421	5.81918475209286	5.20940732517196	5.7342318712717	6.25266162452377
23070265	10.8904556726954	11.1550792013024	10.6709646217182	10.9099189162928	10.6100685479754	10.6400440813492	10.584893974074	10.3568218158576	10.8238583378155	11.0002082028387	10.9488697990029	10.9584341585432	10.8817727843363	11.0644355518745	10.9244268413263	11.0304520222708
23070266	6.21930828046845	5.9592561411891	6.32884847972512	6.2971099388234	5.81138657355489	5.96516911835467	6.65298575721412	6.81948085813634	5.97464008235769	6.06871982777801	5.71902224326302	6.17467795469317	6.1231007004831	5.67824288612711	5.96220010457051	5.82881272379447
23070267	9.49923167045913	9.5808827043738	9.72833930074711	9.52961418196682	9.65747509224161	9.57284711591204	9.51857592248234	9.75192971292029	9.46685446740668	9.29489843840105	9.35844631551861	9.39688391259189	9.48600569331852	9.31636659816704	9.78735347015699	9.60617967059788
23070268	8.67311059289565	8.06486017269952	8.41139860959913	8.20931917508746	9.08069925382387	8.80325583096824	8.8731631086932	8.69728754620842	8.51355663338007	8.07965011516593	8.41296711763365	7.94728675732371	8.3938989906668	8.21436398137385	8.34779253214945	8.16547994974663
23070269	12.9839938867161	13.0850470685115	13.0569082461488	12.9985298194655	13.3476412402775	13.3815179192688	13.3662323118204	13.4224251071002	12.9545148101406	13.0665845656745	13.0467888947459	12.9956523365138	12.8690421593079	13.024608963994	13.0402924250046	13.0179286180759
23070270	10.8250911624279	10.9953258604241	10.9082605113806	10.9281068704718	10.233265946512	10.5192137088175	10.2577397245523	10.2484696519059	10.9149498830997	10.9424897676864	10.9301580004908	10.7303333909263	10.7512843982681	10.8930875272269	10.7896279425437	10.9004799805082
23070271	5.65444920753427	5.50551268704806	5.99966584983335	5.39214794991296	5.81936204518026	5.65082749382645	6.16144583241443	5.75390899192007	5.11159334702706	5.66250861307597	5.57480340160649	5.54413136977097	5.65024790623744	5.43331491211201	5.6656185275615	5.09277790347908
23070272	5.90723318379721	5.9884414946033	5.60753483356989	5.83214975042564	6.12043643826384	6.3165370794165	5.93847745648777	6.10488843963944	5.67667006796524	5.63082417948328	5.50454707329237	5.62017317206127	5.77436840728059	6.10634338743099	5.8708670665443	5.98888617414882
23070273	8.42367813159439	8.67296626788412	8.71160687627004	8.65046716412344	8.56139369253465	8.69345592317021	9.27463174450749	8.81896146868656	8.48461561345295	8.71604649191269	8.50554718030335	8.96218589888367	8.56921430435487	8.6028832677139	8.73339952736701	8.66887304866549
23070274	8.93625853803832	8.58614523187109	8.96740887923281	9.14350880094002	9.30588634199484	8.8508252932989	9.56002640125837	9.30680919962276	8.72969565334781	8.39064343504729	8.89321203504534	8.82888208181467	8.64261628174631	8.42602515036262	8.91157063996966	8.92359245667674
23070275	7.91412872955197	7.94563748086795	8.06837547700156	8.00293271572953	8.00201930416455	8.06959004195556	8.54491671687983	8.21040068952688	7.89341855454239	7.75500764036744	8.02573815859669	8.27841405659061	8.25424799139158	7.90738761601213	7.99728227041662	7.84509657721805
23070276	8.84293688732219	8.64573569971815	8.82760633992916	8.84525956350368	9.15865051003976	9.6980118970153	8.85518610730169	9.62698624072816	8.67628626720687	8.89175559258914	8.8335309181503	8.84986708790885	8.93571707347077	8.64137464296286	8.64315410629414	8.8544835991478
23070277	9.92816764470636	10.0922529818735	10.1608560204558	9.91148364598758	10.261147380715	10.3043464088464	10.2495509871055	9.91242026774505	9.95146374714025	9.96483320120605	10.0577073713896	9.83229456033437	9.79122315786381	9.95855330786722	9.97474121236889	9.93206111106015
23070278	8.36362812968216	8.58016614513316	8.43893590151975	8.34393087355297	8.81709731307028	8.78285023930465	8.73735179079226	8.77580148155406	8.29741724955146	8.44053720899632	8.36706939087898	8.43766847533779	8.66028522903759	8.54874423278144	8.31745468843897	7.99966376781343
23070279	7.7322669552203	7.69966574360796	7.44500583694566	7.54290038597822	7.89826690847691	7.45909250829843	8.45618564917272	8.14423987954307	7.21752790486353	7.58379028698129	7.56401195988597	7.81059476271617	7.37057547237969	7.67658141994948	7.66508336509614	7.70241124087354
23070280	6.74106789565241	6.96204175627199	6.94698084850434	6.85260038443186	6.50279127647323	6.9386773243307	6.81623432061035	6.87835487327816	7.2162888527986	6.68952170836255	6.71754827212862	7.16241075280052	6.48161264150316	6.54592351220508	6.81187237908775	6.81291571486512
23070281	8.00286795230929	8.35399675361497	8.03556102742164	7.97452825473827	8.6037429415443	8.70133933498315	8.27197896980311	8.20272940100617	8.09948383835094	8.0547260475037	7.92391610988972	7.80375560694713	7.86055078622947	8.23639025385128	7.85618901535362	7.95867023902698
23070282	8.8368658273343	8.76408264423747	8.62942284640957	8.7913417833996	9.25511695478213	9.03330060343172	8.63615493067547	9.03370132692702	8.66655528938068	8.48948056742439	8.49460237841635	8.60037906483267	8.74247814292028	8.63669503191079	8.56430800638222	8.4472030886181
23070283	9.14971466190261	9.16691202619363	9.33592667236867	9.12422219522118	10.0031981463279	9.9883723532022	9.78607007396974	9.77036207216519	9.07766968624537	9.05076156173936	9.13598190093894	8.86111712972358	8.9000954375866	9.00933127790666	9.18650154729928	8.98802980639635
23070284	10.7583505279635	10.6262437425257	10.6025175644646	10.769834290282	11.2846948065983	11.2413029802072	11.1347749712591	11.011800315762	10.7292109342473	10.4888071758159	10.4967591633797	10.5356811913805	10.4937611184483	10.6087231149997	10.4691112351592	10.6162885911733
23070285	11.3172135949216	11.0973634447059	11.2373119208179	11.2688067381993	11.5833047806653	11.5536387274155	11.7008412053787	11.6082984297763	11.2127619084396	11.0757868535081	11.2391903309584	11.2061417673921	11.1674263272292	11.1035007717198	11.0867436404283	11.1695882632699
23070286	5.99180405933282	5.53185243588889	6.59666991239142	5.78648775153958	5.26010301423135	5.18218105217515	5.89521572126009	5.74330046584116	5.15939300697114	5.95606573173687	6.02060256477133	5.69344739930999	5.79997965359413	5.0012353890113	6.07411866745548	5.29959714500051
23070287	7.57587101180743	7.13519701445459	7.41269282441013	7.33828717053479	7.49819459012514	7.20989916717948	7.56652320854124	7.44311370998514	7.49758438002251	6.91327167369932	7.57248126933497	7.64985454295331	7.41571975915805	7.51669009359007	7.57836093270867	7.42850810728339
23070288	5.78412664967558	5.89815713202381	6.03205789744763	5.80788076574298	5.93622895777105	5.756385686599	6.03584505259361	5.71205894496875	5.42754544423676	5.70652195615014	5.53219182407381	5.53899073252294	5.70934912783314	6.03270981131289	5.72749517557303	5.4565395470625
23070289	5.69976550473034	5.67338866010553	5.48845893003687	5.85515794084238	5.41621065266933	5.92562016607972	6.23958351467668	5.97217803433481	5.53670275421527	6.06639839333786	6.02796405966645	5.37504465007301	6.02813811559525	5.73881501312273	6.03427347442652	5.63428073987312
23070290	4.79745289281204	4.98490781970626	5.14769773144682	5.22757868887336	5.36181266024184	5.03944397929265	4.98749725438084	4.77253989569689	5.13875264078703	4.91582460200085	5.33174537080202	5.01212135741025	5.10321115493988	4.65241187269603	4.86420609383166	4.87979131212363
23070291	6.69052884838542	6.76753849821931	6.9837357519477	6.41325305656333	6.7881979645319	7.24524033952818	6.82188044551488	6.88076670208429	6.79252920351436	6.91391362920532	6.52618502060999	6.98028183608005	6.5867548292139	7.01605574698606	6.88500220513401	6.8349560654719
23070292	7.16251504847565	6.90276426118938	7.20165056630099	7.03799906037405	7.65225618392865	7.85310163980946	7.94526153041506	7.73082621634153	7.18085326486319	7.30700311037012	7.11036177820238	7.818203445382	7.30245384711423	6.95929979987687	7.25953285506627	7.34352243593901
23070293	7.46938777325049	7.80973114513989	7.59111032509836	7.63282364102802	8.14214618784832	7.76129118237117	7.99970069369975	8.15248790828886	7.40688938149975	7.80943840366133	7.47884372357616	7.80500848203609	7.81544394571073	7.29316301110891	7.43681839357108	7.58902944493897
23070294	5.77436375908949	5.68040536393572	6.13871316171193	5.6712907496287	6.28554787318329	6.64877869723233	6.50657853528543	6.50628539225507	5.71015295214786	5.90677230145603	5.62093537158547	6.2007206872574	6.06657372528824	5.77695274144704	6.05184992143557	5.69310622042396
23070295	4.65248233957485	4.90449444047245	4.8038402874187	4.73787061659996	4.82191522628541	5.00560442752881	5.0747818855363	4.79518653487273	4.5849500113183	5.04221179840615	4.61118476980862	4.90955573920764	4.64764487861988	5.13916988512051	4.43258513497486	4.60684630426427
23070296	4.89768863590438	5.20208459841328	5.28745934590325	5.66345540395331	5.42212615250239	5.87004925078092	5.49940397210332	5.48194493130711	5.48064316215887	5.7053389493061	5.55613331566697	5.5634466007661	5.61876415792296	5.8027510764591	6.09648723625087	5.52125600707356
23070297	9.16425041410804	9.73900750019595	8.90099085860477	9.19708606615518	9.49746163005675	9.74817090725487	9.52682359405482	9.49045359700077	9.31950424495603	9.57186346240867	9.1169805598491	9.19460247408663	9.16522234737768	9.32916656928705	9.13269689624168	9.40724710938627
23070298	8.89213949991717	9.11659719628823	8.79804569977033	8.92167204608468	9.28887656015534	9.43376629558537	9.40318667426343	9.26042715320187	8.98207709915512	9.07437011724038	9.0656738575567	8.94104446370696	8.88378651337098	8.85635876929008	8.95168369641519	8.83201469654619
23070299	9.94129952403102	10.2274551905618	9.65274195226111	9.96690293847471	9.66439953950774	9.69838912233289	9.54840440209344	9.3982737387982	9.85952381361268	9.98366258935796	9.9307150623379	9.98052562993281	9.90258427101002	10.0780943452533	9.97416992988497	10.0946019107862
23070300	9.49923167045913	9.5808827043738	9.72833930074711	9.52961418196682	9.65747509224161	9.57284711591204	9.51857592248234	9.75192971292029	9.46685446740668	9.29489843840105	9.35844631551861	9.39688391259189	9.48600569331852	9.31636659816704	9.78735347015699	9.60617967059788
23070301	9.11935103040063	8.53134149766	8.98017252672265	8.8421626191049	9.72288776102982	9.43597110726	9.44165107838802	9.27019496948248	9.03334647061644	8.61331590069117	8.97359144103904	8.53246712004821	8.90629855373116	8.78761481921342	8.91259857711502	8.74047063365354
23071518	9.78423587841039	9.91194979164124	9.79886910006473	9.83971246158341	10.1444479113287	10.3751874000327	10.1097696622818	10.2841637421655	9.69815087476151	9.8596666569428	9.86796168511201	9.64991938580953	9.49487837372359	10.0417219801948	9.90096727927461	10.0177061820818
23071519	11.2811077050144	11.4134508701664	11.2301072132473	11.320556151908	11.6302308068513	11.6560869967324	11.9508284297689	11.7344571968197	11.0794627920007	11.2828888536515	11.1461766012453	11.5671326694151	11.2563083949195	11.3856345072512	11.1840722079368	11.2239375873831
23071520	5.4493977411876	6.02875575796789	5.61838254825446	5.76568848568531	5.70847188517713	5.97064193236547	5.95754739404911	5.86202922105271	5.41032148109147	5.74535013286031	6.13163474474832	5.352652377218	5.66541883805398	5.32481342628838	5.93187135563174	5.69961915766871
23071521	5.71999843466943	5.4060455367952	5.87151248931696	5.84221584915651	5.73781880073231	5.61513490739945	5.85301757161946	5.88759906924574	5.67795066706465	5.82098180503766	5.96621863552949	5.86540084617253	6.39123688193436	5.89633614075071	5.72652264802795	5.96892620802031
23071522	9.3241754027023	9.30443372501564	9.38536244537941	9.26951429553541	9.47610143255759	9.55436061498113	10.0315951885365	9.92582852201564	8.95077798985179	9.3422662398904	9.46079597999541	9.479398428703	9.46265148818196	9.17329540160159	9.16196174012818	9.21148527664769
23071523	7.07346667537385	7.2087395236561	7.18126356609159	7.35708574738478	7.47244436180207	7.22528266620875	7.24054328543411	7.35352192915195	7.06977095372324	6.92092579152533	6.99954646889025	6.99634778116034	7.19592438404124	7.2311704765216	7.10430617458171	7.33932271306941
23071524	9.68363903626117	9.90226916570845	9.62019849444541	9.65416420360141	9.80743766586768	9.98457951842184	9.78284185011615	9.88635057211147	9.70051138257607	9.8014919148223	9.70464725226695	9.60192527465249	9.57577356651199	9.76646872862021	9.84474868184881	9.79469463582934
23071525	8.77822132790609	8.81847770518075	8.90550594860109	8.78769861176418	9.241943337277	9.11713857554657	9.57350778957307	9.43649819981445	8.35555189372589	8.85444003936929	9.03753472888865	8.99006243137013	8.97327034925617	8.68371901036082	8.68352370683999	8.72568662045652
23071526	8.9937007197361	8.96144447691506	8.94356760270299	9.12858585549474	9.41887653151493	9.49479654172665	9.6447392867274	9.53318791027145	8.80297539344781	8.7129327169236	8.92237962554163	8.94954059818792	9.07670403096753	8.87538571416723	8.84016853382706	8.86095901247629
23071527	3.57619272124625	3.3757278447295	3.55136617453585	3.68191558241358	3.5444884462721	3.9480143683759	3.61709132233971	3.50637922389418	3.40551257739034	3.46950332516469	3.54208249565717	3.55427729253646	3.45466786858094	3.41190908419957	3.52477750704451	3.84852700773778
23071820	5.08685064151347	5.34993486021944	5.35010088737303	5.59276920011854	5.54665457597748	5.33828008678875	5.74433494794934	5.47583662692242	5.35360486279939	5.51564756381778	5.25334226505299	5.43214942764501	5.6411324824928	5.41866650111814	5.4983584457966	5.41191625233381
23071821	4.93837961197836	5.29430862043986	4.79370966263635	5.00226452491719	5.06865564159335	5.25815150680142	5.1194854572237	4.88629153402693	4.65579163447469	5.14234358620978	4.97842180745342	4.99865126649547	5.05233339132785	4.81177096372033	4.63950097610991	5.08783914927544
23071822	6.0560589956288	6.18841179197497	6.10669071421911	6.11194402217689	6.43056281549665	6.58798801611105	6.3363579945612	5.84893138408319	5.82001580288939	5.89003171040306	5.95566749805358	6.22513964706895	6.32725129329662	6.10648016678353	5.84735030904359	6.00443593402434
23071823	5.22049257347941	5.58920390803121	5.11871194182976	5.18578141409514	5.66615400689081	5.4979476547027	5.91558907634883	6.0757781787273	5.00462433106613	5.4267179545984	5.26697934696632	5.50201908485658	5.43759098840096	5.4533736182586	5.36112689082256	5.32677849540336
23071824	5.4369046522659	5.51205513687509	5.52130998463107	6.00863583853782	5.25359704196433	5.42691203688294	5.76250035081164	6.12998817721284	5.65673020400719	5.84948461380686	5.20203138938603	5.94626850992452	5.53049825472985	5.18525817972068	5.72689099353266	5.63361404802179
23071825	5.13255785891105	5.54175049930269	5.16927987352847	5.45670166028528	5.44935372373198	5.18622429763757	5.51520263389362	5.10496226507194	5.62127252493636	4.92114959583979	4.82202726813466	4.98254794771	5.11765466726349	4.90620145997504	5.20203156608057	5.12629511376173
23071826	5.60580751445548	4.98475603023267	5.6203621669935	5.29277101251325	5.50748988919272	5.66693100484754	6.03498991330722	5.87146002078874	5.68406407752585	5.43118173721583	5.56712965236708	5.72911386084787	5.88734121789205	5.19795548410714	5.40356342066764	5.05970318980364
23071827	8.41483172836504	8.32309124142503	8.33502104149147	8.19923886102614	8.50554757153773	8.45692157894806	8.90022694015871	8.71579857439421	8.07684911928187	8.05787902327823	8.27211458003229	8.35488667730379	8.39033763601937	8.13127901298307	8.21479507706424	7.87323927914254
23071828	5.44595374174048	5.57968498115974	5.39696834195139	5.75094184076494	5.71388747664315	5.85609511692474	5.88929181988081	5.88644243030818	5.45498439643933	4.99076355838298	5.53839865860331	5.77610876461515	5.75769131591777	5.50998108953899	5.65772439204231	5.17424619645964
23071829	7.06881666072642	7.11989984048201	6.95367229745909	6.58019718493517	6.92288014984457	7.07997542795255	7.66541708743461	7.1310467668058	7.02030205231473	7.24413879212448	7.07768991118947	7.0548170672722	7.15709099185246	6.67426301051822	6.77697044805721	6.59200952940754
23071830	5.10509213985683	5.42843904682306	5.13350476220621	5.64072685512032	5.19883593735111	5.65979314854454	5.55854868918862	5.47155759982182	5.70731923709226	5.57963401162197	5.622616416431	5.42225828710743	5.27219235900641	5.11923202137561	5.61309406558831	4.98433050261012
23071831	6.89603549095194	6.91582578493144	6.9287357611687	6.94341118497313	6.8154511428297	7.1293938698221	7.28748776714528	6.82332450730632	6.57395957511231	6.63908373484381	6.98591914520492	6.73679875072395	7.30743766699628	6.48283052693679	7.06109583944812	6.83988843737178
23071832	5.1591549003833	5.37903428971404	5.17993633554452	5.13591236853427	5.48463826491384	5.32715495019095	5.0933764944903	5.10126381402123	4.85269316849272	5.15163287904772	5.27682905048316	4.89148994334139	4.92598016676156	5.37543088460302	4.76342717587044	5.21853730662005
23071833	6.09911040601812	5.85706620807519	6.23615050197893	6.23076235555699	5.82975759647411	6.11972157385553	5.50299600933565	5.64967281400556	6.03367138323743	6.4762715132254	6.1258371371262	6.13520617938106	6.19661811954417	6.12094614994848	6.10618980120739	6.29140998460701
23071834	10.1206338109716	10.1959446927614	10.3051038588186	10.3247580082301	10.1596807471708	10.3023942070861	10.545772754805	10.1509325799189	10.3321176315322	10.1923723765127	10.3838129212729	10.2419174494219	10.0833772176994	10.2583201640985	10.2350475917043	10.1399699991587
23071835	9.79771606554353	9.86759839275895	10.1374087751835	9.82135807560291	9.91090313041341	10.1925554331496	9.98674226562895	10.1923040239936	9.76756788171548	10.1487980277287	10.0167641597196	9.66621662312408	9.77042621711996	10.0113914236627	9.8438160365918	9.9345775125309
23071836	10.907023073663	10.7663051937978	10.8313515465865	10.917239583453	10.2805313618888	10.2618757021778	10.1920716272487	10.1408787952432	10.8373414825932	10.8613801728812	10.8593262086097	10.9062279491858	10.8879506908489	10.8490982377454	10.9130279383198	11.0152257091533
23071837	10.7303357126377	10.4705299498355	10.7078844201156	10.7161611867616	11.5649278827084	11.5514355151842	11.4004296658441	11.5042530180883	10.7411341369841	10.5789241681366	10.6448806034921	10.3051347911123	10.2693480142487	10.5450026629022	10.6825273452862	10.6972574701894
23071838	11.3435430568599	11.4524732266692	11.5419536305113	11.4656183298426	11.6963242278133	11.9760163858108	11.9981286407921	11.9680641334779	11.3823470023096	11.4368579833872	11.5765220448383	11.4319085447867	11.4918979715751	11.4687008558878	11.4602193623628	11.5885740000083
23071839	6.87932605599084	6.37790498857115	6.98482591108264	7.07209261387095	6.80310795746536	6.8206044160586	5.86995912771198	7.28381018608879	6.86550694535804	6.79280399389722	7.2181944973993	6.717119060353	6.77522571407997	6.56211932679522	6.82933631074521	7.36465602934473
23071840	9.71730832403768	9.63566146676807	9.91735807570049	9.78297374036753	9.7994110574477	10.0392312869115	9.59884054688357	9.87870555861185	9.43374233135613	9.68851871637591	9.66666300386139	9.76279851291729	9.61726103885303	9.64542379856213	9.60353578824034	9.73565028329662
23071841	5.80594554444711	5.33236521613525	5.34409232863002	5.57540716060993	5.45761204814141	5.29297123510866	5.91180177405101	5.69882008895471	5.52390811862567	5.21211731878527	5.64192185084703	5.53623568295915	5.7684135967943	5.29999181675899	5.24347226991325	5.47400506593267
23071842	4.89647948166748	4.73990784058759	4.82280020283754	5.3046370972443	5.68979068595996	4.7174203438339	5.0809424072424	4.90712498588676	4.57423955285841	4.7782068891858	4.58968093670692	5.03421306332655	4.81637031822504	4.93474367225736	4.85910590304892	5.17492741619501
23071843	5.22937393485224	5.52659633563099	4.82758439325034	5.06427454905222	5.26813745538506	5.35763441882361	5.30031934786055	5.09953296379946	5.08587388908703	5.05181310172998	5.11715274456114	5.10771792198718	5.07414081136274	5.1203076056729	5.77762957674788	4.74608309344849
23071844	4.80673465234928	4.59172707539056	4.74030282549498	5.0333624707982	4.83351101701377	5.17316636109189	5.37060311091487	5.02247492710911	4.93583342001485	4.76782493389198	4.74610367814087	5.34193737558709	5.33341935461816	4.69651314237727	5.0561973566942	4.83375929616495
23071845	11.5054245509447	11.5780243581524	11.5524850445697	11.5214700794673	11.1132404688184	11.1104581603002	11.4063331221497	10.8804509386067	11.5626211411169	11.5238776458244	11.5014410720759	11.6242830618555	11.5189469600726	11.4003551068965	11.4757491842912	11.5290609437233
23071846	10.5632593266018	10.7876588797973	10.6520299229095	10.6392063104547	10.5053953897815	10.7270818634536	10.536273079397	10.4266778324896	10.6380717623489	10.8393251072345	10.6780609130798	10.5608522120665	10.5807548715462	10.838654503573	10.6025775572026	10.5905191630521
23071847	9.84136342117497	10.1458120101074	9.70892485922754	9.83123177308766	10.0565761661605	10.13750417772	9.75227236276739	9.97058150660136	9.67718577415299	10.0052884060056	9.87189486707856	9.81626000023881	9.72744149271871	10.0002514898421	9.81758696706176	9.90842772268785
23071848	7.91984667290925	7.84101035518169	7.66348026748835	7.70168999739198	7.31391089516986	7.50487030106855	7.95561274120212	7.60852332249612	8.05669319109299	7.80938520108893	7.622306721574	7.80242662260682	7.75820142125141	7.9722294218351	8.03849958191965	7.7520163857535
23071849	13.1527999811256	13.0715453815213	13.1986824721196	13.1597262365071	12.097655201449	11.9941503397616	12.1447080364319	12.1237847703611	13.1133037533914	13.0571599212271	13.161027666195	13.1207090888443	13.0783855008742	13.0210752684402	13.1045507408959	13.1446814811799
23071850	9.08092345284902	9.02671185902701	8.99738369906349	9.05487065109552	9.32740888674975	9.20604017852632	9.84848677112232	9.4142339812921	8.84645954261588	9.08976451808768	9.13251446387067	9.47281234530991	9.24388474932185	8.96454467073346	9.0977123768083	9.11818615788054
23071851	11.1984544481202	10.9835917913725	11.0003743237128	10.9422813601039	11.9250251412803	11.7723590346994	12.0079050409383	11.6370292943191	11.2077090183727	11.016232800319	11.0286305890334	11.0141805615013	10.9329738753738	10.8390209277347	10.9335418082134	10.8845533289427
23071852	7.0344696956564	7.09612477632963	7.4525042438937	7.45212307339144	7.1850687288911	7.51222053495932	7.61668860058315	7.5104916475265	7.09453813750514	7.2723750277656	7.16235317347676	7.63412557498627	7.52521425400249	7.0402914827152	7.4875965738632	7.24294405177192
23071853	4.8273098793861	4.45008595345839	4.60275994729281	4.88188693097487	5.14234975265574	5.10679220811562	4.77607079699174	5.17885593325547	4.54509530646228	4.81474561185786	4.95468042559402	5.04452042045296	4.96067615945465	4.58844544390796	4.84877067812964	4.48075723051872
23071854	6.29748653649388	6.42997423009289	6.303212044058	6.05758699993321	6.41435467003327	6.26689738376523	6.80149332658217	6.23998673297541	6.40770274198117	6.31243532070702	6.2539083891144	6.09280764247256	6.30058397308668	6.08556358918966	6.33327447808181	5.83874726323323
23071855	7.51749536012726	7.50034901229243	7.42308062049555	7.59859466111743	7.6513748362602	7.60657794264091	7.84208347504707	7.51650358053209	7.80644168503544	7.83497590708318	7.54998318679878	7.46474283801108	7.84664847374981	7.67241539207108	7.94086267065882	7.46779444245281
23071856	4.90941321101261	5.04383324505333	4.73639716123829	4.5668711607728	4.77037127774791	5.04948970860093	4.94579475930101	4.61568998920255	4.68959923474881	4.51650296935422	4.43360350729607	4.98491833491559	5.04045235122385	4.72099092071169	4.77004379284055	4.80580520470329
23071857	7.34634750674977	7.43656152992346	7.44339070706534	7.32678399523161	7.06846853687904	7.00883218053339	7.69503409372051	7.51778927123307	7.8032778019898	7.48187673147722	7.91672601307877	7.68558741766522	7.3297346407474	7.34225900154538	7.48968823170324	7.28454544378711
23071858	4.88714069292702	5.24162000592343	5.09798116267531	4.92661431599537	5.3543336148755	5.15925591624715	5.02459466284088	5.25406886165881	5.19252730973927	4.56697232991812	5.09122962416131	5.58217207080506	5.02731628226631	4.90266550218772	5.20595826757572	5.11169091796089
23071859	6.84192666952061	7.09746407640979	6.83309040261441	6.74567294400608	6.73631494314601	6.84901067000656	6.93568800730491	6.67993696845207	6.83966430399046	7.03888891787158	6.94932372305027	7.03787431830822	7.25650870953531	6.92690971145435	6.92235808017688	6.53296815007701
23071860	7.81298781907517	7.09529600428721	7.57635966230611	7.20374258207874	7.28215613632317	7.33417229710306	7.77038797536779	7.49879744185325	7.18061741769982	7.46676651117168	7.7099773330421	7.57476332810247	7.95356604294785	7.7562071727798	7.3960417739626	7.61217563323286
23071861	9.30105330529574	9.57432151186298	9.50793939981491	9.69286245955435	8.88278557013368	9.40845594749949	8.98053681841829	8.71788774492567	9.38776052895716	9.63606218813838	9.54638072196124	9.57816726291941	9.46742901287361	9.51371337090305	9.52357895412634	9.68850346982397
23071862	8.11689958831641	8.41676757245901	8.03844444179314	8.26117724352738	8.11661954371346	8.43175510763446	8.36162751817709	7.89754725168411	7.9744089066002	8.0337056846565	8.38650740907804	8.03103301903515	7.99821178083191	8.06684576518153	8.14337587645513	7.98057108465024
23071863	6.48876124213289	6.73298163504107	6.92968701301404	6.8229644122981	7.30394832813636	7.05375107972474	7.31902524513344	7.27292675861309	6.41503692122439	6.6632703907217	6.74335323675049	6.81743053435249	6.47849221524044	6.58117471135066	6.80027491909194	6.26306215133343
23071864	10.5217852489617	10.0650145918364	10.2223528816402	10.2209456859814	10.7957206201119	10.5511390329667	10.5876432920725	10.5988304837284	10.5793704638002	9.99463831452121	10.1653238476961	10.128642002235	10.285506049033	10.214815100383	10.3407666532021	10.2129781584388
23071865	6.44701893547581	6.72956363283218	6.88027245730208	6.5589749891743	6.59793722753209	6.39445203709852	6.8372568348113	6.50647034956557	6.54813030891553	6.52619033867401	6.83374783085664	6.78154368313718	6.74721528945816	6.55159219191278	6.43059900702793	6.57647290166311
23071866	7.73481110136621	7.40299626023542	7.85476782009261	7.57997514934974	7.6272546004418	7.98286872321219	8.72298324397042	7.79547755320958	7.74600308602483	7.75004880844087	7.63601618275611	7.98455396346075	7.55197413904455	7.35901487812354	7.48271435118908	7.75402177948141
23071867	7.31723803069492	7.54212697207536	7.56954422294973	7.30647845195408	7.75031125829917	7.69428276013888	7.76014937566163	7.74165118304821	7.48661316579675	7.49456099441984	7.48710129309717	7.42553503365976	7.68662277940757	7.52806243406854	7.2394550822692	7.31967415127519
23071868	6.22140305628058	6.52055505217892	6.11369804215884	6.23297848448317	6.2394232962274	6.49803922668433	6.86158873272573	6.39983288805805	6.43340764616699	6.21491516341606	6.45564275356853	6.52993310736004	6.31125091558332	6.47706002935699	6.26135839803295	6.27066967033203
23071869	6.36199264436683	6.47457120045145	6.25915440862156	6.44713348410751	6.34258551688596	6.34909531067121	6.41623309325669	6.50545860743832	6.18587059146145	6.41667649917734	6.26667353761632	6.38727302904907	6.58839160813126	6.39657420146676	6.25659986752711	6.20565162751657
23071870	7.50864031218995	7.56496139870761	7.92556356120514	7.18510102439411	7.64104473376892	7.46507013144482	7.93308771080662	7.59932840669585	7.22401439093198	7.35653618673452	7.58203314168951	7.69420372697796	7.31878732689087	7.42033537060185	7.54463728282347	7.66634107199135
23071871	8.71068940468845	8.50203818061037	8.74505968503229	8.73412656398962	8.88692799448006	8.97538893157059	8.99575174356311	8.69217212819954	8.5735311296648	8.69189854259127	8.75377703870314	8.91521767681133	8.84021674723357	8.6752404595857	8.54770857808657	8.70972936253029
23071872	5.08535394458862	4.92878759015525	5.19966712369104	5.00086929829766	5.52081453162062	5.17347129788627	5.67856989103661	5.30898758516769	5.32881290131871	5.19152675372797	5.26175730630355	5.68848021882031	5.38392962185958	5.38373729373768	5.28235669900682	5.27158538727849
23071873	7.9384082665112	8.09423061726784	8.27279141099223	7.91934006720482	8.55268747239887	8.55705229717557	8.45550963237161	8.4386415826196	8.21695620059322	8.33020684180964	8.22387912615943	8.26390550664135	8.46398368934766	8.35861848786402	8.31265808338569	8.15924473444322
23071874	8.94887010356551	8.98071907072823	8.84796015798097	8.85329392854818	8.86444101158268	9.0068220514588	8.864040546584	8.72157145212594	8.90202604631632	9.02601572173969	8.67049760365459	8.93488388672349	8.68992407675764	9.06555564171085	8.73312135327769	8.92450060977198
23071875	6.76991698038272	7.03878733242454	6.64668608641066	7.3402222204044	7.25811835951181	7.65155605329207	7.48915177972528	7.36843868533763	6.97681657255287	7.01788898332859	7.20122411381893	7.50067470204094	7.46643181310721	7.17104094547491	6.9161272555271	7.17970497809574
23071876	4.60866192286807	4.46344766380123	4.29484792937671	4.25285827458989	5.02207258998722	4.97667893190006	4.93058556563517	5.02042885436019	4.19659555192672	4.63121614762012	4.18169634210182	4.4689547929262	4.23340074808338	4.0976832155135	4.57891815309878	4.25274794380327
23071877	6.7450837475023	7.19081906143802	7.13835368329485	6.62075435676265	7.46574214209737	6.99957956547078	7.18292559802313	7.40273668809795	6.66499442060167	6.98136686118336	6.92006181446199	6.73727047582455	6.6587939766464	7.20435934657441	6.88907647257232	6.9179545823195
23071878	6.29452667406882	6.35136441472543	6.32321259893886	6.17751414762299	7.14552447396467	7.00222242181961	7.1108892004776	6.85556411140602	6.40443091248217	5.87623421659379	6.33125743296585	7.05958410702988	6.52287828235858	6.25794545696571	6.23793125631027	6.39147491798974
23071879	11.5054245509447	11.5780243581524	11.5524850445697	11.5214700794673	11.1132404688184	11.1104581603002	11.4063331221497	10.8804509386067	11.5626211411169	11.5238776458244	11.5014410720759	11.6242830618555	11.5189469600726	11.4003551068965	11.4757491842912	11.5290609437233
23071880	9.63399594386787	9.93699233571588	9.72863004560148	9.87890868690059	9.34778824504716	9.63853187308389	9.53406413469383	9.12304544127917	9.80332745170028	9.91633131457003	9.75743184610874	9.61558036968229	9.78779445234308	9.95997793826515	9.64710253651126	9.76177754308456
23071881	9.20418923788993	9.45856622320814	9.43769814853697	9.44803381121636	10.1441483436063	10.2341046764372	9.94603500336272	10.0640480082467	9.51216072759025	9.60226205951854	9.53689839181362	9.57883679070323	9.41309101152005	9.54111015842099	9.66184619578217	9.39220352075194
23071882	9.78626301749705	9.64711367983538	9.54475236298201	9.56078680610638	8.8275992644605	8.73246852664683	8.64905572170286	9.0650337372735	9.73789957836086	9.70659431728826	9.64328990366607	9.61807228177739	9.73170599820069	9.76180429441732	9.87395203414654	9.62889178801823
23071883	12.9519296810519	12.97415176768	13.0033914624765	12.947861053087	11.9627957773289	11.7638918849832	11.9195448022973	11.9493251658438	12.9844375134868	12.8611354832455	12.984016991486	12.9982001553325	12.8687093813787	12.8235691169718	12.9367173966786	12.9425014293716
23071884	5.04464553651531	4.78180602037866	4.98596465152905	4.75598527420515	5.05723233534746	4.68051715209845	5.39791553422651	4.92926894700599	4.35346081522945	4.70937934716034	4.9442654969372	4.79405530501642	4.5874630847609	4.4790710415711	4.58823432454549	4.78904671023288
23071885	6.54714547723751	5.96799351983427	6.14337543881011	5.90075239419543	5.93881129738207	6.15213181871092	6.22040124579768	5.85287157459472	5.96618912119025	6.20717912472764	6.3380391714617	6.1682880406897	6.39419334992521	6.77981414475882	6.05381325839997	5.86379056666648
23071886	5.54279842089627	5.9645779211211	5.54512587563268	5.9760725548019	5.62261692001871	5.59936330822182	5.19149566334372	5.49996396442072	5.68176558509233	5.04053819599933	5.35696857890649	5.9493921417875	5.69380151346323	5.66269007160103	5.81940219330373	5.24737769245157
23071887	7.83074267719494	7.96734196022066	7.78890348632134	7.97407189534668	7.80503324398521	7.87839691585427	8.22245528756009	7.94594531676051	8.12145772848727	8.05767089707145	7.86328649393127	7.66192389303323	8.09279412510375	8.09066100725989	7.82411587285102	7.69050192783271
23071888	4.90941321101261	5.04383324505333	4.73639716123829	4.5668711607728	4.77037127774791	5.04948970860093	4.94579475930101	4.61568998920255	4.68959923474881	4.51650296935422	4.43360350729607	4.98491833491559	5.04045235122385	4.72099092071169	4.77004379284055	4.80580520470329
23071889	6.82534428261225	6.90752358883858	6.58492355265839	6.75914556669596	6.75822933785984	6.54996760179272	7.42928747050781	6.77602493857745	7.04452863198977	6.97513932064675	7.07680216679096	7.36332532225899	6.55229912910216	6.93856247554443	6.91908565081626	6.70838319275087
23071890	4.88714069292702	5.24162000592343	5.09798116267531	4.92661431599537	5.3543336148755	5.15925591624715	5.02459466284088	5.25406886165881	5.19252730973927	4.56697232991812	5.09122962416131	5.58217207080506	5.02731628226631	4.90266550218772	5.20595826757572	5.11169091796089
23071891	6.84192666952061	7.09746407640979	6.83309040261441	6.74567294400608	6.73631494314601	6.84901067000656	6.93568800730491	6.67993696845207	6.83966430399046	7.03888891787158	6.94932372305027	7.03787431830822	7.25650870953531	6.92690971145435	6.92235808017688	6.53296815007701
23071892	6.968279398334	6.69612468095624	6.95376909701688	6.48345897824367	6.58264502597289	6.86293715948295	6.93667370678747	7.08457285626589	6.51742403313502	6.92258970766883	7.13646260018285	7.11206044784725	7.29719216065251	7.15092982040095	6.7830412603478	6.8641223502748
23071893	9.38796912116682	9.50295987503007	9.60845707923614	9.61140026644461	8.85483033974648	9.37239555006624	8.82364741693403	8.88475507899264	9.29265713653677	9.59509040167597	9.5819537326259	9.4448322489657	9.40382800758004	9.48965330378913	9.5024479635654	9.705048649616
23071894	8.08375137442219	8.38473328814399	7.86688515977906	8.22400479770748	7.8729512414132	8.21705884467866	8.26715012231668	7.63926447025946	7.80427226107611	7.99659082887204	8.0356181231842	8.05660533438734	7.89315235551041	7.92901248194021	7.9903246095736	7.84288774845099
23071895	6.4782549336607	6.23401729438304	6.51648476960828	6.45709409501887	6.90849039804147	6.2174310456433	6.76029179956684	6.96007472663425	6.29386366726184	6.57640675295561	6.51041934530818	6.87937276307026	6.71634239566306	6.46041926209398	6.5353426327713	6.15416307185492
23071896	11.0148793290228	10.5379143693369	10.8473971554171	10.7603044767997	11.1459716885152	10.6036677887292	10.8231113929724	10.7288098449049	11.1990064397939	10.5354397473698	10.7175915416949	10.5321855947574	10.9521235565976	10.738544574623	10.7601672731091	10.7167028167089
23071897	9.34298486250284	9.34475124933007	9.50581825668058	9.39258439975807	9.48807280479506	9.7346557705291	9.93321173903252	9.69668466776182	9.58864557643242	9.23211625791459	9.4377006376275	9.82958231123871	9.66610500577079	9.10589281762164	9.50492046597782	9.32339850534125
23071898	4.6144177981011	4.5522660194995	4.66181517739812	4.51790914210735	4.18131380268578	4.61782603280706	4.87059910303866	4.6085230118405	4.78389806010398	4.94060241871994	4.6669439845394	4.77676845979875	4.78435951215959	4.83796409156387	4.49822861912787	4.80629217382114
23071899	7.07172086752186	7.08866158648837	7.25266968972735	6.71595490413122	7.37880400660991	7.42501090351784	7.44268130468844	7.29692875599608	7.0744807203288	7.29170173970513	7.22117154568817	7.4692724930069	7.41420760310424	7.36628975134359	7.41565043359194	6.99967176904861
23071900	8.96899846472844	9.01725069917795	8.8855910913976	8.854220369327	8.929314146618	9.03644042692637	8.98995006337653	8.80616952475757	8.92565412659337	9.075632500347	8.71101876370328	8.95890322810836	8.71399576694563	9.03196674852247	8.76205740253583	8.93769159837014
23071901	4.99017547524721	5.33139912664049	5.35642484408048	4.93417355789026	4.75857580867877	4.61540768757642	5.45133060301517	4.90848022283831	4.83701676685172	5.07329553017718	5.01174144751579	5.26043618136398	5.38936845819841	5.12363542600185	4.8961896258084	5.09550436741574
23071902	5.8164595223432	6.38129703952653	5.88520464695273	5.88794998823453	6.07608136015054	6.5379387854964	6.63717385723693	6.13656630660427	6.1808668688392	6.18236219112902	6.10185694648285	6.44766285956005	6.14390405137733	6.29330354032013	6.03173317790365	5.9877298443582
23071903	6.36199264436683	6.47457120045145	6.25915440862156	6.44713348410751	6.34258551688596	6.34909531067121	6.41623309325669	6.50545860743832	6.18587059146145	6.41667649917734	6.26667353761632	6.38727302904907	6.58839160813126	6.39657420146676	6.25659986752711	6.20565162751657
23071904	5.92360844923112	5.88104445459072	6.48080950576741	6.16407655506927	6.22633872914042	5.95698452653139	6.38045032823647	5.9294050958565	6.0104686930918	6.16158565414563	5.95852156286714	6.11920384428891	6.00018373145019	5.93517705257395	6.281328753963	6.23574936044688
23071905	11.5054245509447	11.5780243581524	11.5524850445697	11.5214700794673	11.1132404688184	11.1104581603002	11.4063331221497	10.8804509386067	11.5626211411169	11.5238776458244	11.5014410720759	11.6242830618555	11.5189469600726	11.4003551068965	11.4757491842912	11.5290609437233
23071906	10.3638999300337	10.6932039841973	10.383072152766	10.3745837916939	10.2102963677527	10.3750090560268	10.1292413410582	9.94753275202815	10.5590959497286	10.7874308013633	10.4244891727797	10.3870353706657	10.5429434092418	10.6952542601686	10.3511539477625	10.4803310377676
23071907	9.21827828729592	9.46655845135139	9.44892272174848	9.40567768102749	9.69148276941887	10.1462145491654	9.87781294732571	9.98475141425874	9.3320418489031	9.55672118366481	9.46974644267516	9.53828530243361	9.3835657223275	9.4900362574974	9.38535571951908	9.35111089995014
23071908	9.78626301749705	9.64711367983538	9.54475236298201	9.56078680610638	8.8275992644605	8.73246852664683	8.64905572170286	9.0650337372735	9.73789957836086	9.70659431728826	9.64328990366607	9.61807228177739	9.73170599820069	9.76180429441732	9.87395203414654	9.62889178801823
23071909	12.9519296810519	12.97415176768	13.0033914624765	12.947861053087	11.9627957773289	11.7638918849832	11.9195448022973	11.9493251658438	12.9844375134868	12.8611354832455	12.984016991486	12.9982001553325	12.8687093813787	12.8235691169718	12.9367173966786	12.9425014293716
23071910	8.24097957804302	7.81410115578144	8.46067598734178	8.10472338392346	8.04871610925422	7.9726165593171	8.6250693021379	7.70633152153699	7.96755519434426	8.39192662282925	8.39536472278287	8.25187226627049	8.3982812682068	8.1834406402147	7.90987589224133	7.91441658837842
23071911	7.180210517399	6.6923377834763	7.08346491622378	6.90967903802086	7.23946810544971	7.14514139258783	7.2904533560018	7.01085784334718	6.89763988968133	7.20285679562205	7.11718492482782	7.12203601276798	6.94112326175534	6.9940254650111	7.26605902541344	6.56530187894078
23071912	7.76132065647422	7.76389002102824	7.7178392046507	7.84388294896209	8.01085899597608	7.967925371807	8.15930725130886	7.89804733592629	7.94144037781435	8.1536023670861	7.7396870464285	7.90232278375352	8.16828024748286	7.95745034998492	8.24321301200647	7.82615838895862
23071913	4.32284735061935	4.26020392755365	4.00235337529367	3.93162443982157	4.07962437201907	4.41452746742293	4.20333056098185	3.922381578294	4.19491787074243	3.97662840849427	3.93597993139781	4.25858359419812	4.2607919358904	4.1188326642437	4.30092504123082	4.1884882914646
23071914	6.63854608036151	6.90857955761793	6.86698810985007	7.00934014282545	6.30265847206739	6.51638901874373	7.53160490406575	7.20052113307493	6.80910551798198	6.98645100562952	7.05273609102078	7.35827563949734	6.86882899752978	6.83994221423057	6.92146221712927	6.67043300651554
23071915	4.88714069292702	5.24162000592343	5.09798116267531	4.92661431599537	5.3543336148755	5.15925591624715	5.02459466284088	5.25406886165881	5.19252730973927	4.56697232991812	5.09122962416131	5.58217207080506	5.02731628226631	4.90266550218772	5.20595826757572	5.11169091796089
23071916	6.84192666952061	7.09746407640979	6.83309040261441	6.74567294400608	6.73631494314601	6.84901067000656	6.93568800730491	6.67993696845207	6.83966430399046	7.03888891787158	6.94932372305027	7.03787431830822	7.25650870953531	6.92690971145435	6.92235808017688	6.53296815007701
23071917	7.81298781907517	7.09529600428721	7.57635966230611	7.20374258207874	7.28215613632317	7.33417229710306	7.77038797536779	7.49879744185325	7.18061741769982	7.46676651117168	7.7099773330421	7.57476332810247	7.95356604294785	7.7562071727798	7.3960417739626	7.61217563323286
23071918	8.96080816706188	9.07597307660757	9.15370837143956	9.22739362918142	8.41516228912404	8.79455110742728	8.3453380948381	8.28479562240369	8.86567033811427	9.1728856492745	9.17021535274941	9.06931653574101	8.97934649257397	9.11837091947123	9.06664869882488	9.30813315951204
23071919	8.16416083897055	8.39584451794177	7.97312590640358	8.13157133351306	8.09348850325466	8.42353002758639	8.33650330781693	7.722248795974	7.895365475416	8.11389276583212	8.12928619869027	8.07807904134701	8.02748962011877	8.00557151916758	8.07142387381534	7.89628962261064
23071920	6.70585858531798	6.47730055488497	6.67518739505517	6.789157305589	7.29486183421161	6.6034371275659	7.02315554774523	7.07875444798726	6.65757659820225	6.80764900161701	6.63950403120094	6.95101769422045	6.46010202908631	6.68900963421864	6.66801229459138	6.51600929988079
23071921	11.0254589973082	10.5405229260951	10.8534133553478	10.7911351909949	10.9731026129533	10.5499335005579	10.8243983661948	10.6389028684572	11.1930635112659	10.5360914200096	10.6982324655003	10.5806560311106	10.9712076764602	10.757826535818	10.7614383929501	10.7097414646322
23071922	5.8148638847547	5.66064272064704	6.1973083033435	5.41744202251429	5.96308746470759	6.04483568149408	6.04554933060039	5.86828974791428	5.63561490340432	5.82043399564257	6.07298867569694	6.15157200962226	5.89917125515181	5.69642482802577	5.92451071550031	6.09068349131893
23071923	5.08535394458862	4.92878759015525	5.19966712369104	5.00086929829766	5.52081453162062	5.17347129788627	5.67856989103661	5.30898758516769	5.32881290131871	5.19152675372797	5.26175730630355	5.68848021882031	5.38392962185958	5.38373729373768	5.28235669900682	5.27158538727849
23071924	6.900188119669	7.13222967845661	7.25485314771841	6.9006128763491	7.38123783122953	7.52511200978936	6.99823018637428	7.29940594623259	7.09383264184349	7.29170173970513	7.06717569892786	7.38657319471806	7.41241882099366	7.37922716330016	7.29787923915824	7.10823850040225
23071925	8.96060824396029	9.0583633658446	8.84407136589518	8.82895768949073	8.87444147193416	8.94198672149967	8.87581886888893	8.76734214143932	8.94725623853899	9.06877840666303	8.76109575600442	8.98037976504642	8.69883883661636	9.06820302422459	8.71369004648863	8.92930137760199
23071926	11.49076591962	11.5756852098289	11.4907056087941	11.504709897703	10.966249968874	11.0722621813239	10.8855880910684	10.7429609538615	11.5133999620323	11.553993424467	11.4616623615334	11.5744963262442	11.5232908013369	11.3994500788917	11.4297731723983	11.5413011265071
23071927	10.2735359674461	10.7957693342665	10.324425343585	10.5849209955466	10.1351928994451	10.4614349938563	10.0225291563321	10.0828853841476	10.3711889077359	10.7152243176995	10.3935511918432	10.2694537261659	10.4219643018345	10.6599555726593	10.3516534752375	10.3969873367034
23071928	9.14428789622067	9.50700922431823	9.31178537431523	9.38468673629615	10.1049438686914	10.2136733743654	9.86470306874173	10.2566532158016	9.41922449566574	9.55672118366481	9.51335305278447	9.40379297499096	9.37853647927972	9.49057281632562	9.6209924844224	9.35667670182613
23071929	9.78626301749705	9.64711367983538	9.54475236298201	9.56078680610638	8.8275992644605	8.73246852664683	8.64905572170286	9.0650337372735	9.73789957836086	9.70659431728826	9.64328990366607	9.61807228177739	9.73170599820069	9.76180429441732	9.87395203414654	9.62889178801823
23071930	13.1048432799811	13.072154587718	13.1127764121316	13.0958875528616	12.0957280597127	11.9419928560066	12.1087613622558	12.0901432342092	13.1128891844955	12.9724844638914	13.1116199669211	13.066059626316	13.0244699265767	12.9651621226775	13.0613141159936	13.0833263773831
23071931	5.93314439938809	4.97591154426913	5.62466298697226	5.68506438392748	5.8349086861842	5.78886789995296	6.15990760077684	5.47731992902801	5.85469699267766	5.62311752366333	5.8911938893007	5.85874156781544	6.04853048527102	6.44715278412783	5.69405783146434	5.5941778562846
23071932	8.22078066420049	7.95575057897394	8.22453143279652	7.83592681157628	8.46685146482869	8.33297257988128	8.77983251893481	8.34381894622373	7.81143364786165	8.14140399812497	8.21109264421102	8.53502790290226	8.35382344716872	8.11195943564417	8.09803561340259	8.3411563887587
23071933	7.47601363411922	7.49620798811989	7.44787568973357	7.6119620826565	7.66561629262543	7.60243691846837	7.95462385958879	7.50048440810698	7.63266682944097	7.84625344230066	7.55978654481847	7.47336483511461	7.81051581928236	7.65335082026581	7.94086267065882	7.46821486942405
23071934	4.90651263801476	5.01129504424987	4.65168164493087	4.44717103729552	4.6646872554002	5.04180870415138	4.98486571057887	4.58849155943429	4.63045320853876	4.48756702662195	4.5154320443895	5.18295325633695	4.82115173627347	4.75870862321908	4.86584642118925	4.59527646264791
23071935	6.63854608036151	6.90857955761793	6.86698810985007	7.00934014282545	6.30265847206739	6.51638901874373	7.53160490406575	7.20052113307493	6.80910551798198	6.98645100562952	7.05273609102078	7.35827563949734	6.86882899752978	6.83994221423057	6.92146221712927	6.67043300651554
23071936	4.88714069292702	5.24162000592343	5.09798116267531	4.92661431599537	5.3543336148755	5.15925591624715	5.02459466284088	5.25406886165881	5.19252730973927	4.56697232991812	5.09122962416131	5.58217207080506	5.02731628226631	4.90266550218772	5.20595826757572	5.11169091796089
23071937	6.84192666952061	7.09746407640979	6.83309040261441	6.74567294400608	6.73631494314601	6.84901067000656	6.93568800730491	6.67993696845207	6.83966430399046	7.03888891787158	6.94932372305027	7.03787431830822	7.25650870953531	6.92690971145435	6.92235808017688	6.53296815007701
23071938	7.32673082812303	7.05167935611531	7.12616297767556	6.91844025820159	6.99725311605423	7.24029823161089	7.51194196328036	7.44012753142496	6.90202423550794	7.22059942182119	7.56249974407265	7.3652113880787	7.54183843891374	7.46218452967541	7.10619961555891	7.21582054285343
23071939	8.96080816706188	9.07597307660757	9.15370837143956	9.22739362918142	8.41516228912404	8.79455110742728	8.3453380948381	8.28479562240369	8.86567033811427	9.1728856492745	9.17021535274941	9.06931653574101	8.97934649257397	9.11837091947123	9.06664869882488	9.30813315951204
23071940	8.69717498210288	8.87548188511239	8.46454997306203	8.62787137351027	8.30480035738623	8.79120347923609	8.70174768392027	8.43229976640193	8.4009082577772	8.67485914620777	8.62964669866585	8.64657823921149	8.53214746329797	8.51027510964803	8.72200358066294	8.42472429146724
23071941	6.0518796342341	6.08590135446502	6.11597061276027	6.48007853453099	6.87365706629375	6.17914839221256	6.6995086154636	6.86818872625496	6.19837701774526	6.42189740583717	6.11601806487557	6.44471194755815	6.25537231088073	6.26735477756171	6.28149977835726	5.7464020475382
23071942	11.024960405744	10.5319441287907	10.8619366034952	10.7621794239487	11.0452404803424	10.5363747881377	10.8466169092742	10.7438014573873	11.105026940042	10.6050695539007	10.7119371047603	10.6477452590742	10.9225504386421	10.7769850646839	10.7113040810681	10.7193809381455
23071943	5.52010166182175	5.40953998697605	6.08298308811389	5.3922786014748	6.03424654067606	6.22777096949534	5.93120906690791	6.03277597283176	5.47093180564934	5.7774782226613	5.88637649056217	6.08665511912631	5.56480326411163	5.99544240867034	5.84415380853744	5.69887412800649
23071944	5.08535394458862	4.92878759015525	5.19966712369104	5.00086929829766	5.52081453162062	5.17347129788627	5.67856989103661	5.30898758516769	5.32881290131871	5.19152675372797	5.26175730630355	5.68848021882031	5.38392962185958	5.38373729373768	5.28235669900682	5.27158538727849
23071945	6.900188119669	7.13222967845661	7.25485314771841	6.9006128763491	7.38123783122953	7.52511200978936	6.99823018637428	7.29940594623259	7.09383264184349	7.29170173970513	7.06717569892786	7.38657319471806	7.41241882099366	7.37922716330016	7.29787923915824	7.10823850040225
23071946	9.04621508720024	9.15277412094457	8.95730476358658	8.89070331164021	9.00555036294714	9.11255235687685	8.96822969356387	8.90659437826306	8.9970256902872	9.23481996354858	8.80865916313392	9.03261899908323	8.83549935737849	9.11199330878573	8.85120731064639	9.01490822084195
23071947	11.1497078857783	11.2547240482286	11.1951923419933	11.1760292459689	10.7729485570703	10.7813285670842	11.0633381651021	10.5725737034797	11.2009708749217	11.216878976919	11.1595961814562	11.2857225279541	11.1789985226148	11.0629073304077	11.115606149978	11.2133217865598
23071948	10.1878922908319	10.3778054903077	10.2510429829526	10.3173131733555	10.0922742801204	10.3705413388167	10.299914262951	10.2122251859462	10.3470125296142	10.3769430728305	10.3201174805615	10.2125597830903	10.391562326919	10.4422098860852	10.244624096863	10.2828247746586
23071949	9.28787345735231	9.4850305111218	9.31536813750212	9.47549687812171	9.71969366722018	10.1231537685292	9.83020426226269	10.0068634495621	9.3862964809611	9.4838669659968	9.51966378268406	9.40691248043691	9.33579030093804	9.44869172380025	9.57419785941664	9.46456461628141
23071950	9.78626301749705	9.64711367983538	9.54475236298201	9.56078680610638	8.8275992644605	8.73246852664683	8.64905572170286	9.0650337372735	9.73789957836086	9.70659431728826	9.64328990366607	9.61807228177739	9.73170599820069	9.76180429441732	9.87395203414654	9.62889178801823
23071951	13.1048432799811	13.072154587718	13.1127764121316	13.0958875528616	12.0957280597127	11.9419928560066	12.1087613622558	12.0901432342092	13.1128891844955	12.9724844638914	13.1116199669211	13.066059626316	13.0244699265767	12.9651621226775	13.0613141159936	13.0833263773831
23071952	5.39938625361369	5.0388494536497	5.68973061512627	5.85253565828996	5.56308748175439	5.41106383433597	5.74686035632602	5.25364343093871	5.94421083015311	5.47519349119979	5.46288486932718	5.83100594502282	5.80782456199348	6.02796741227204	5.47336639042391	5.05759969663199
23071953	4.8970584533888	4.31708209272731	5.05686889445303	4.87594560007456	5.05599230005356	4.76866955409412	5.21979803045815	4.89843486687609	4.70007950653557	5.11268767407286	4.90278107253254	4.92797043679115	5.01810800406776	5.56224689001549	5.06402505681371	4.7964023840906
23071954	7.47601363411922	7.49620798811989	7.44787568973357	7.6119620826565	7.66561629262543	7.60243691846837	7.95462385958879	7.50048440810698	7.63266682944097	7.84625344230066	7.55978654481847	7.47336483511461	7.81051581928236	7.65335082026581	7.94086267065882	7.46821486942405
23071955	4.96585541153182	4.90366257064046	4.78488038936432	4.61759139944168	4.83285430420506	5.2929969386391	4.81414987359982	4.65406362179168	4.84752842682969	4.59085109751625	4.41901342268714	4.93956788043126	4.95311082594742	4.71740921582045	4.89380532880387	4.72195516230281
23071956	6.62634701668306	6.82907271603441	7.02155443624503	6.76007986857627	6.55168005032441	6.5607946659567	7.21869570408053	6.79181230849391	6.99132528109933	6.93786854652721	6.75619188292081	7.33281533186753	6.66297448979446	6.89095701270075	7.0094387831217	6.68386312351148
23071957	4.88714069292702	5.24162000592343	5.09798116267531	4.92661431599537	5.3543336148755	5.15925591624715	5.02459466284088	5.25406886165881	5.19252730973927	4.56697232991812	5.09122962416131	5.58217207080506	5.02731628226631	4.90266550218772	5.20595826757572	5.11169091796089
23071958	6.84192666952061	7.09746407640979	6.83309040261441	6.74567294400608	6.73631494314601	6.84901067000656	6.93568800730491	6.67993696845207	6.83966430399046	7.03888891787158	6.94932372305027	7.03787431830822	7.25650870953531	6.92690971145435	6.92235808017688	6.53296815007701
23071959	7.32673082812303	7.05167935611531	7.12616297767556	6.91844025820159	6.99725311605423	7.24029823161089	7.51194196328036	7.44012753142496	6.90202423550794	7.22059942182119	7.56249974407265	7.3652113880787	7.54183843891374	7.46218452967541	7.10619961555891	7.21582054285343
23071960	9.30105330529574	9.57432151186298	9.50793939981491	9.69286245955435	8.88278557013368	9.40845594749949	8.98053681841829	8.71788774492567	9.38776052895716	9.63606218813838	9.54638072196124	9.57816726291941	9.46742901287361	9.51371337090305	9.52357895412634	9.68850346982397
23071961	8.08375137442219	8.38473328814399	7.86688515977906	8.22400479770748	7.8729512414132	8.21705884467866	8.26715012231668	7.63926447025946	7.80427226107611	7.99659082887204	8.0356181231842	8.05660533438734	7.89315235551041	7.92901248194021	7.9903246095736	7.84288774845099
23071962	6.83424821193915	6.4333503146608	6.63154259112126	6.50014919745401	7.00482215777106	6.36568914997326	6.70896021375432	6.95805195015702	6.46710211144388	6.72318910329442	6.50645213672732	6.90886879298179	6.36809193933818	6.57739550657606	6.60163731875736	6.44629108696392
23071963	10.9806230207737	10.5407233541526	10.8591374937752	10.7604499996027	11.032970333716	10.5490646466579	10.7894822548272	10.7411897970746	11.1886171553283	10.5991053887881	10.7355690419173	10.5950318688695	10.9354551645357	10.7628162258411	10.7739429944563	10.7175345601959
23071964	5.37022931401517	5.7238497830018	6.10784441311034	5.37699308544975	5.77784512708601	5.57173158638904	5.88210782197484	5.9392605794998	5.51602695085867	5.60289224014686	5.89762415708363	6.23586274561563	5.66559343299911	5.72443943590052	5.81562866674568	5.44350290695037
23071965	5.08535394458862	4.92878759015525	5.19966712369104	5.00086929829766	5.52081453162062	5.17347129788627	5.67856989103661	5.30898758516769	5.32881290131871	5.19152675372797	5.26175730630355	5.68848021882031	5.38392962185958	5.38373729373768	5.28235669900682	5.27158538727849
23071966	7.36707918976253	7.44539296794139	7.51893387403466	7.03094383204652	7.92888754863737	7.76982349099764	8.16008187722234	7.75850828910581	7.44940307116904	7.59089102436947	7.48183749015729	7.72547761461172	7.71535130430141	7.63982914852318	7.73063936150725	7.3036099120244
23071967	9.03260075984699	9.12509485928767	8.96209949516631	8.9208104780676	9.07897688789674	9.10474263553719	8.99118081867541	8.8987846569234	9.04559474858318	9.14524352415167	8.79874040667205	9.03193841478746	8.84288866980114	9.01906909304505	8.88457620371851	8.9864091309649
23071968	11.1497078857783	11.2547240482286	11.1951923419933	11.1760292459689	10.7729485570703	10.7813285670842	11.0633381651021	10.5725737034797	11.2009708749217	11.216878976919	11.1595961814562	11.2857225279541	11.1789985226148	11.0629073304077	11.115606149978	11.2133217865598
23071969	10.2690127383067	10.6093924984879	10.3336775043462	10.3999041576112	10.1337770634886	10.4409278556992	10.2653619511362	10.1066459334203	10.4580506610955	10.6103105486519	10.4018237203594	10.2907945713588	10.3510467890854	10.6601447293175	10.3263403644822	10.3643041577589
23071970	10.0468943049626	10.3006602597735	10.145324451575	10.116874228709	10.8120247598181	10.8676763652392	10.6496873290702	10.953173848672	10.2091314618157	10.348139957977	10.1828389227974	10.1376105231765	10.0723805816128	10.1918824067133	10.1209690476245	10.1374203921017
23071971	9.78626301749705	9.64711367983538	9.54475236298201	9.56078680610638	8.8275992644605	8.73246852664683	8.64905572170286	9.0650337372735	9.73789957836086	9.70659431728826	9.64328990366607	9.61807228177739	9.73170599820069	9.76180429441732	9.87395203414654	9.62889178801823
23071972	13.1048432799811	13.072154587718	13.1127764121316	13.0958875528616	12.0957280597127	11.9419928560066	12.1087613622558	12.0901432342092	13.1128891844955	12.9724844638914	13.1116199669211	13.066059626316	13.0244699265767	12.9651621226775	13.0613141159936	13.0833263773831
23071973	6.16761613079421	6.36035393268921	6.18537658670429	5.93396635686441	6.13228246303878	6.19622406945793	6.48616914782544	6.08855000409072	6.14893065259998	6.14862283050904	6.09793409560436	6.11577500402356	6.3185307190408	6.00947273420478	5.91552941282582	5.82806200187994
23071974	7.17356026875743	7.31273106377018	7.22335091338188	7.40576338289465	7.46652570881201	7.41895999411866	7.73341131571434	7.29916550271453	7.46722704409309	7.65663286898926	7.37599333904434	7.17373926402765	7.6266400290965	7.45336364510334	7.74105468259557	7.14682345866404
23071975	4.903569296037	5.03490381398309	4.70652783407337	4.57822825439534	4.68548856975784	5.28572318443383	4.96343589238685	4.62685963557081	4.68617658338605	4.56140236635058	4.44458322158045	4.8578261075132	5.01938856677526	4.70910806497832	4.76005918345498	4.71788228970258
23071976	6.75850673143799	7.00637933913219	6.85004309825306	7.06225202002248	6.59250498886351	6.53121646750251	7.24386208657989	6.97692173198318	7.15482777916085	7.049651789427	7.03967563087849	7.44364788635208	6.64617060524579	6.82299720263356	7.12789276339456	6.8094613060447
23071977	4.88714069292702	5.24162000592343	5.09798116267531	4.92661431599537	5.3543336148755	5.15925591624715	5.02459466284088	5.25406886165881	5.19252730973927	4.56697232991812	5.09122962416131	5.58217207080506	5.02731628226631	4.90266550218772	5.20595826757572	5.11169091796089
23071978	6.84192666952061	7.09746407640979	6.83309040261441	6.74567294400608	6.73631494314601	6.84901067000656	6.93568800730491	6.67993696845207	6.83966430399046	7.03888891787158	6.94932372305027	7.03787431830822	7.25650870953531	6.92690971145435	6.92235808017688	6.53296815007701
23071979	7.81298781907517	7.09529600428721	7.57635966230611	7.20374258207874	7.28215613632317	7.33417229710306	7.77038797536779	7.49879744185325	7.18061741769982	7.46676651117168	7.7099773330421	7.57476332810247	7.95356604294785	7.7562071727798	7.3960417739626	7.61217563323286
23071980	9.48442204327536	9.65060367566319	9.64203120768953	9.6584923347818	8.75565894455379	9.21725916019311	8.86788984776919	8.62318493481726	9.51680086911362	9.67245028199024	9.58095793203176	9.49595871193701	9.52153852464988	9.56197258050578	9.60965596752271	9.70427561280265
23071981	8.96998148800557	9.11348663068447	8.75884538761498	8.88063259615877	8.73653996568785	9.22755737680285	9.06850251704459	8.70905010032396	8.69939282463246	8.9644156143939	8.91149471416031	8.8694266476243	8.82761178350165	8.7903360588839	9.0020645298988	8.67833071226221
23071982	5.61402662224176	5.39593302626968	5.34906396684207	5.62637942190676	6.30799166258643	5.49815063340334	5.95670270704012	6.32294949718699	5.56799955178074	5.89303609271369	5.64117356807473	6.20427531570861	6.03568249170957	5.76975374175547	5.71765274650668	5.23223934082104
23071983	11.0045495095401	10.5339029184592	10.8589599266871	10.7112222826113	11.1503332822539	10.5783239939401	10.8462200592321	10.8099015880865	11.0944784839824	10.5921822872111	10.7332676395556	10.599614741535	10.9135835517276	10.7411927799763	10.6968895216701	10.712717759181
23071984	5.39693376047981	5.54491242539821	6.03124718341635	5.27956913731199	5.94734820831316	5.96520623332427	5.91056048862821	5.93689441297563	5.35822234148653	5.70427773290899	5.83823421288979	6.26805748218645	5.50572363990364	5.88150817610664	5.81655123010682	5.320137739691
23071985	5.08535394458862	4.92878759015525	5.19966712369104	5.00086929829766	5.52081453162062	5.17347129788627	5.67856989103661	5.30898758516769	5.32881290131871	5.19152675372797	5.26175730630355	5.68848021882031	5.38392962185958	5.38373729373768	5.28235669900682	5.27158538727849
23071986	7.06227286249385	7.18159825495607	7.28664928856153	6.89364820507769	7.55633388039266	7.46693568923772	7.41245113170008	7.32155543590611	7.10917717624384	7.36992721719349	6.99775607324053	7.28985569142537	7.37618970692974	7.32453464401443	7.43587904997852	7.14679935468996
23071987	8.99929505648842	9.15295032248702	8.7404742550614	8.83562493095136	8.98730992249999	8.95528884774338	8.79121352956497	8.76446489136414	8.9550266330918	9.0577335282867	8.70989135551731	8.96734188625563	8.68716444217225	8.89095523675433	8.79400808822714	8.9101741717725
23071988	11.4893563591629	11.5132758482047	11.5130748742518	11.4983878967979	11.0971722770366	11.0943899685184	11.3876563658684	10.8643827468249	11.5121559366694	11.5418640510447	11.4762094949128	11.6100813140287	11.5413499291872	11.3872661164822	11.4400538635124	11.5376805726344
23071989	10.24808658223	10.5839931681156	10.2043564627718	10.4319001736739	9.94723840073975	10.022380444918	9.66579102285548	9.43786521474286	10.3863288241764	10.5726759881611	10.2509737524971	10.1422113571664	10.3780534315861	10.5354511735275	10.1710608421731	10.3299113794063
23071990	9.84136342117497	10.1458120101074	9.70892485922754	9.83123177308766	10.0565761661605	10.13750417772	9.75227236276739	9.97058150660136	9.67718577415299	10.0052884060056	9.87189486707856	9.81626000023881	9.72744149271871	10.0002514898421	9.81758696706176	9.90842772268785
23071991	8.13210166617003	8.05220777476333	7.87938680038657	7.97738926011258	7.54381407346819	7.74857163594697	8.18415794174355	7.85989163321053	8.27999491731097	7.94119933274423	7.84943304978858	8.11601826079501	8.0613578454296	8.1174819490376	8.26704478246108	7.98151698353407
23071992	13.1299979435687	13.0803295585218	13.185733884922	13.1519161931846	12.0399302024943	11.9591010335535	12.0779486110709	11.9798906098786	13.1076172883571	13.0467014624578	13.1455643745878	13.0789463579413	13.059956536685	13.0008226243162	13.1101305743486	13.1201772973667
23071993	9.20374564969979	8.99664368512611	9.075554296347	9.11771392618932	9.51629080307739	9.48487723690853	10.043249696759	9.54799663532821	8.89443268321958	9.18999870303059	9.21868832990447	9.54819767016891	9.24849801907917	8.97357588397307	9.16919772159885	9.20032387748229
23071994	11.1984544481202	10.9835917913725	11.0003743237128	10.9422813601039	11.9250251412803	11.7723590346994	12.0079050409383	11.6370292943191	11.2077090183727	11.016232800319	11.0286305890334	11.0141805615013	10.9329738753738	10.8390209277347	10.9335418082134	10.8845533289427
23071995	5.13196785278016	5.3261039493717	5.52394563485374	5.22014542794008	5.20145189700792	5.57818628720438	5.7606594760183	5.6526536776693	5.31005666578321	5.51220544186995	5.47108103666196	5.8021303816498	5.71513545168549	4.88977502217685	5.54074592417147	5.32250142862466
23071996	4.52763822412666	4.45727059172957	4.54128674362424	4.58498570644386	5.09414204940361	5.16950351524366	4.61526985501765	5.15688750382596	4.52187771593367	4.63805096984992	5.1378996393995	4.76363600731437	4.83946600408632	4.40957633884251	4.66164296194323	4.30120027168323
23071997	5.93314439938809	4.97591154426913	5.62466298697226	5.68506438392748	5.8349086861842	5.78886789995296	6.15990760077684	5.47731992902801	5.85469699267766	5.62311752366333	5.8911938893007	5.85874156781544	6.04853048527102	6.44715278412783	5.69405783146434	5.5941778562846
23071998	5.89505673417638	6.1345494983334	6.19535589293339	6.14713764469438	6.49979661393766	6.39594017154509	6.73565201480593	6.32343463941656	6.43542581801997	6.11605323864418	6.26969287049141	6.72817844288054	6.31294989479697	6.20621146445473	6.02142222078124	6.05491581503952
23071999	5.42520794259763	5.96133137335197	5.46020202495501	5.86768689597875	5.70302812984473	5.6088911402348	5.29962061810709	5.54766984312692	5.58902319597202	5.06051901885253	5.37093179268821	5.95611716671551	5.73330493905287	5.81769161395064	5.71297976165615	5.25038417033473
23072000	7.83074267719494	7.96734196022066	7.78890348632134	7.97407189534668	7.80503324398521	7.87839691585427	8.22245528756009	7.94594531676051	8.12145772848727	8.05767089707145	7.86328649393127	7.66192389303323	8.09279412510375	8.09066100725989	7.82411587285102	7.69050192783271
23072001	4.48668770334997	4.265780048668	4.2984226816249	4.37891038929386	4.68400902098911	4.28231784639326	4.23376615184445	4.2065253001358	3.87404101163669	4.30269149019335	4.13242512348585	4.15538586393622	4.50689490782104	4.10773873010098	4.07484741285602	4.32519943555839
23072002	7.34634750674977	7.43656152992346	7.44339070706534	7.32678399523161	7.06846853687904	7.00883218053339	7.69503409372051	7.51778927123307	7.8032778019898	7.48187673147722	7.91672601307877	7.68558741766522	7.3297346407474	7.34225900154538	7.48968823170324	7.28454544378711
23072003	4.88714069292702	5.24162000592343	5.09798116267531	4.92661431599537	5.3543336148755	5.15925591624715	5.02459466284088	5.25406886165881	5.19252730973927	4.56697232991812	5.09122962416131	5.58217207080506	5.02731628226631	4.90266550218772	5.20595826757572	5.11169091796089
23072004	6.84192666952061	7.09746407640979	6.83309040261441	6.74567294400608	6.73631494314601	6.84901067000656	6.93568800730491	6.67993696845207	6.83966430399046	7.03888891787158	6.94932372305027	7.03787431830822	7.25650870953531	6.92690971145435	6.92235808017688	6.53296815007701
23072005	7.32673082812303	7.05167935611531	7.12616297767556	6.91844025820159	6.99725311605423	7.24029823161089	7.51194196328036	7.44012753142496	6.90202423550794	7.22059942182119	7.56249974407265	7.3652113880787	7.54183843891374	7.46218452967541	7.10619961555891	7.21582054285343
23072006	9.38796912116682	9.50295987503007	9.60845707923614	9.61140026644461	8.85483033974648	9.37239555006624	8.82364741693403	8.88475507899264	9.29265713653677	9.59509040167597	9.5819537326259	9.4448322489657	9.40382800758004	9.48965330378913	9.5024479635654	9.705048649616
23072007	8.66394041251193	8.88760538773293	8.53174816553451	8.751901549269	8.36274000586749	8.77259661003043	8.71844754000499	8.57840936509713	8.47831570695767	8.61394924135554	8.77938541229866	8.55538722803845	8.52273724592202	8.5865658273209	8.76294862031069	8.46530103461847
23072008	6.48876124213289	6.73298163504107	6.92968701301404	6.8229644122981	7.30394832813636	7.05375107972474	7.31902524513344	7.27292675861309	6.41503692122439	6.6632703907217	6.74335323675049	6.81743053435249	6.47849221524044	6.58117471135066	6.80027491909194	6.26306215133343
23072009	10.5217852489617	10.0650145918364	10.2223528816402	10.2209456859814	10.7957206201119	10.5511390329667	10.5876432920725	10.5988304837284	10.5793704638002	9.99463831452121	10.1653238476961	10.128642002235	10.285506049033	10.214815100383	10.3407666532021	10.2129781584388
23072010	6.47701715209426	6.75373696508858	6.88998976328693	6.78703131386014	6.56450403954919	6.37281449516671	6.73317255938783	6.4990987395125	6.55746505760557	6.53111798143596	6.8049630601013	6.8092518384196	6.67112368293382	6.76726598829692	6.42560735281915	6.60361095651829
23072011	7.62511602434946	7.30841577589174	7.95492614150035	7.69646272313343	7.75267372357252	7.97790153813626	8.25140619228577	7.9190769661269	7.42787622637404	7.85794028562297	7.55085630193831	8.00800535948006	7.62470183859881	7.75078694077546	7.93080452016159	7.64094418240149
23072012	7.54353752383007	7.56235239962236	7.51742329563187	7.41718049097178	7.94181823905022	7.96805668890303	8.60343849679333	7.92309130063205	7.49211710425935	7.44924138083965	7.39114412047895	7.94594696605528	7.98243792581728	7.63038421560216	7.56646053321792	7.3659670002438
23072013	9.36416093795108	9.35014279931086	9.54146950840044	9.40666810601716	9.50281996755669	9.64870490978145	9.95966645469659	9.74730509682093	9.56043032919642	9.17207261710666	9.45286531027277	9.78057547388297	9.723366886182	9.19484342588034	9.5173375052457	9.37110714604159
23072014	7.52131346625001	7.7002380745233	8.00159894958572	7.4114046836261	7.83469591978487	7.36164362049451	8.10498516585939	7.9057302540566	7.68737990519919	7.68505126427028	7.76889112461032	7.77963763251095	7.50284442575431	7.6171236713336	7.87270760776731	7.81617897728619
23072015	9.28262248610246	9.17061604953399	9.33559701935051	9.39505770276374	9.62196658719524	9.74836988040216	9.62271426531728	9.56699317878425	9.17872999248073	9.25094272588907	9.32846271210324	9.30562132763622	9.49129025801467	9.25551940767173	9.27053662637718	9.2796976430254
23072016	4.26268707929961	4.07072977565603	4.33465985096125	4.09039687663478	4.60321755072629	4.56126331612087	4.73098561893955	4.5520833523199	4.43804794603487	4.36882748128151	4.3537970620183	4.44511869642984	4.36784561146468	4.51008820394023	4.37724574206119	4.40397606409801
23072017	7.2126436472772	7.2344505642752	7.24723390076911	6.79908764148165	7.67695559076144	7.48076786797752	7.4704198520581	7.32489675701333	7.15238054131988	7.33713083400021	7.02933583379493	7.4850494817275	7.33069158622627	7.469450768865	7.49878317094238	7.04984972165514
23072018	9.03268670187463	9.06912435220531	8.82858344016311	8.86463736679202	8.86975893460501	9.07347076943137	8.78402789034233	8.72474960552377	8.88285580053386	9.1093715090107	8.65631120426535	8.94057775159237	8.69202628060532	9.02598802651875	8.7516567534842	8.93124487099335
23072019	6.65966953472905	7.05240210849526	6.56816641811499	7.40831119937006	7.29377332501522	7.61446974354925	7.68189791537867	7.27750841891166	6.9536113070429	7.13015100482335	7.15399148618538	7.15475562641748	7.4284516710435	6.7756793061791	7.03453235501089	6.84546897818247
23072020	4.26863017685457	4.67866301814438	4.28854173699959	4.39519177514676	4.73056990358202	5.05759113317712	4.99259324810167	4.81023364101635	4.39811724901839	4.64654961325766	4.34143837729271	4.52116744326171	4.25856370538065	4.13844029346092	4.58966001889416	4.25181765878787
23072021	5.2148436144016	5.7738918894864	5.79025909058034	5.51295189267021	5.47727789372456	5.55369237351405	5.6008264753617	5.91586595698571	5.41897276521728	5.52426904776173	5.4954735768243	5.57492616098563	5.60069405971638	5.43517590894685	5.77852549149819	5.82384012027977
23072022	7.76633520112495	7.87738907872928	8.08990721901819	8.24471453958729	8.19328023692654	8.41712980499705	8.89098251047282	8.66261704749243	8.23955151574321	7.93315347636218	8.21235991349487	8.6912774319019	8.49795536677292	8.02181507629635	7.90607972654152	8.1052839500154
23072023	11.5130069980807	11.636247084777	11.5364486704923	11.5277367248318	10.990474110232	11.098880011884	10.9698124060405	10.7647277233868	11.5538085451352	11.5497550595706	11.4834291310586	11.5897080751945	11.5009343258003	11.4145898223008	11.4758610664761	11.527074303451
23072024	10.4543532768776	10.6771854219314	10.4826526222757	10.3638643352063	10.2434709202417	10.5566146787774	10.2919159036703	10.0932514872127	10.5926793734174	10.6741830835465	10.5231147492329	10.4041446827629	10.5287854347158	10.5397996202708	10.2779179635204	10.4783940450078
23072025	9.59235060180423	9.81744801802974	9.58980683350045	9.71538088950204	10.3220205096878	10.3869570171504	10.2865129089405	10.4724545005832	9.77049907885108	9.81308687314952	9.72161663603686	9.52225995528051	9.54034415556617	9.66865759934057	9.64369441316924	9.68231595614799
23072026	9.78626301749705	9.64711367983538	9.54475236298201	9.56078680610638	8.8275992644605	8.73246852664683	8.64905572170286	9.0650337372735	9.73789957836086	9.70659431728826	9.64328990366607	9.61807228177739	9.73170599820069	9.76180429441732	9.87395203414654	9.62889178801823
23072027	13.0385339801781	13.0078678531976	13.0524704278826	13.0240631942258	12.0977343572943	11.9189415994041	11.9894592791415	12.1783916547491	13.0625168978254	12.9305355154719	13.0344944362961	13.0173401534263	12.9554155588594	12.8960755808392	13.0169804611242	13.0150761988277
23072028	9.59252778041922	9.55732754895751	9.52093830986376	9.68256138342315	10.1418732056612	10.0094320156248	10.6334113301195	10.2444661393924	9.45139090651308	9.87898631762351	9.57393813688576	9.80053127680049	9.94207105968571	9.61650151641031	9.74668076039248	9.55099433863231
23072029	6.53393428463283	6.70888245116152	6.6111745199151	6.66783854106874	7.33167029384386	7.48095717166549	7.30627637956722	7.12942110346083	6.65598017277382	6.21727188773953	6.63611540397349	7.21768351031567	6.86783276294828	6.55719818426494	6.75718171115049	6.77502432871911
23072030	6.27621828606671	5.62094781143323	5.89602431832255	6.08683655490463	6.08262232220627	6.17184113724298	6.36635127846786	5.79540787361155	5.60725788663889	5.95067264739973	6.1006815891546	6.05667478138219	6.30289585760484	6.35401909249519	5.77360765896932	5.80062153397561
23072031	7.76132065647422	7.76389002102824	7.7178392046507	7.84388294896209	8.01085899597608	7.967925371807	8.15930725130886	7.89804733592629	7.94144037781435	8.1536023670861	7.7396870464285	7.90232278375352	8.16828024748286	7.95745034998492	8.24321301200647	7.82615838895862
23072032	4.90941321101261	5.04383324505333	4.73639716123829	4.5668711607728	4.77037127774791	5.04948970860093	4.94579475930101	4.61568998920255	4.68959923474881	4.51650296935422	4.43360350729607	4.98491833491559	5.04045235122385	4.72099092071169	4.77004379284055	4.80580520470329
23072033	6.14675551924076	6.43707648183404	6.47026448965688	6.29283741971723	6.13772032134884	6.12741772657698	7.11329984297381	6.29913212679115	6.47645154283706	6.55139716747862	6.37872069780814	7.07407990253405	6.24901476081889	6.48164150380382	6.42967165600853	6.10707737071577
23072034	4.88714069292702	5.24162000592343	5.09798116267531	4.92661431599537	5.3543336148755	5.15925591624715	5.02459466284088	5.25406886165881	5.19252730973927	4.56697232991812	5.09122962416131	5.58217207080506	5.02731628226631	4.90266550218772	5.20595826757572	5.11169091796089
23072035	6.84192666952061	7.09746407640979	6.83309040261441	6.74567294400608	6.73631494314601	6.84901067000656	6.93568800730491	6.67993696845207	6.83966430399046	7.03888891787158	6.94932372305027	7.03787431830822	7.25650870953531	6.92690971145435	6.92235808017688	6.53296815007701
23072036	7.61027023865065	7.09972755993414	7.38167051970746	7.01201534451876	7.04583723270153	7.12046608829437	7.31049017164102	7.30096734739179	6.97886935937851	7.47588928105927	7.51120477106516	7.47824195873414	7.75285462199354	7.61135452424101	7.20851604039582	7.31796596828494
23072037	8.97678307131896	9.15827445202068	9.15486092294277	9.224649667553	8.37935081942406	8.77651888222688	8.33931927805452	8.17060776892821	8.94148495184901	9.20090105152783	9.10940870156935	9.08124518559165	9.04246541084128	9.09388896882199	9.10309528778869	9.27148225319232
23072038	8.16257688277275	8.37622669391911	7.93923720825097	8.1361888184483	7.95541332090867	8.4340881554697	8.3254042669801	7.7096447612752	7.83024527153127	8.13409575418366	8.28743931911462	8.04332971238499	8.040464908236	8.00771781903883	8.21798436034505	7.91051849152722
23072039	6.31337684191374	5.96353351259978	6.10919185931921	6.15454603803926	6.64015535895511	6.21970538275807	6.69110754368905	6.79017192938967	6.17143179107337	6.43944175932979	6.24014470967418	6.69961111766294	6.39714190287397	6.30608420948938	6.17354746098696	6.11880284379607
23072040	11.0254589973082	10.5405229260951	10.8534133553478	10.7911351909949	10.9731026129533	10.5499335005579	10.8243983661948	10.6389028684572	11.1930635112659	10.5360914200096	10.6982324655003	10.5806560311106	10.9712076764602	10.757826535818	10.7614383929501	10.7097414646322
23072041	5.62558624027112	6.08796065278456	6.16852590527414	6.40983700677738	5.98751766979761	6.36924846058194	6.7343984244455	6.09547315373405	5.96604162472627	6.16795539864879	6.12466902825202	6.45457587741436	6.03874438935023	5.76760542765609	6.38739576506141	5.89740943427074
23072042	7.80188804441581	7.41837773263276	7.91538969085634	7.63233511073364	7.67232003731913	8.00824614289047	8.66639386940263	7.7923757500113	7.28781441572545	7.71790109762804	7.62214614476041	8.22282584987236	7.58111100264	7.74327426154621	7.61586285951829	7.63954625096942
23072043	7.31723803069492	7.54212697207536	7.56954422294973	7.30647845195408	7.75031125829917	7.69428276013888	7.76014937566163	7.74165118304821	7.48661316579675	7.49456099441984	7.48710129309717	7.42553503365976	7.68662277940757	7.52806243406854	7.2394550822692	7.31967415127519
23072044	6.26310560112826	6.43036093912742	6.08231811447525	6.19440688978404	6.2704238583593	6.39343207062919	7.04138245498589	6.24500437528772	6.23235991298856	6.106333518559	6.2256004501882	6.35089020049777	6.14863233351358	6.40520151485977	6.16418063477413	6.2600103219271
23072045	9.34298486250284	9.34475124933007	9.50581825668058	9.39258439975807	9.48807280479506	9.7346557705291	9.93321173903252	9.69668466776182	9.58864557643242	9.23211625791459	9.4377006376275	9.82958231123871	9.66610500577079	9.10589281762164	9.50492046597782	9.32339850534125
23072046	5.08535394458862	4.92878759015525	5.19966712369104	5.00086929829766	5.52081453162062	5.17347129788627	5.67856989103661	5.30898758516769	5.32881290131871	5.19152675372797	5.26175730630355	5.68848021882031	5.38392962185958	5.38373729373768	5.28235669900682	5.27158538727849
23072047	6.95162354103597	7.05133447761956	7.19220872650362	6.46508502043411	7.26714676895966	7.34977491632841	6.9633413019384	7.18527151834583	6.98916126712049	7.27434930250807	6.88482090253437	7.29488543504542	7.26325453622357	7.3383576772819	7.21270621983751	7.061063946875
23072048	9.03268670187463	9.06912435220531	8.82858344016311	8.86463736679202	8.86975893460501	9.07347076943137	8.78402789034233	8.72474960552377	8.88285580053386	9.1093715090107	8.65631120426535	8.94057775159237	8.69202628060532	9.02598802651875	8.7516567534842	8.93124487099335
23072049	6.36199264436683	6.47457120045145	6.25915440862156	6.44713348410751	6.34258551688596	6.34909531067121	6.41623309325669	6.50545860743832	6.18587059146145	6.41667649917734	6.26667353761632	6.38727302904907	6.58839160813126	6.39657420146676	6.25659986752711	6.20565162751657
23072050	5.59427452513146	5.76327497017442	6.07577139932286	6.16060903938129	6.14512771435852	5.79313595748751	6.04430687581934	5.71480719407368	5.55562605868869	6.00106493293821	5.70724740180778	6.06806738570669	5.88373316761864	5.78767632728585	6.21031344727732	6.01537864909924
23072051	10.8019179570139	10.3191109493636	10.7241852414896	10.51558288311	11.4842148570793	11.3417078229875	11.5393004930359	11.3603784522767	10.7828868063616	10.3364022441156	10.7468737512025	10.4413337856292	10.5648180273668	10.3603978408992	10.6639170391078	10.4087929811091
23072052	9.37187934068588	9.34238454247887	9.44201732329425	9.4237598880906	10.1303011181296	9.99968749583018	10.1513004628184	10.0113066574586	9.37327505956371	9.25685308612529	9.30545163388006	9.46529292426055	9.25189259195809	9.34979711215737	9.47775624648944	9.36869320937537
23072053	12.6776796846096	12.6283077302252	12.7921064958944	12.6456720339073	13.1030173269462	12.8743700139597	13.063446621945	13.0410119740116	12.6604848961911	12.6520013392603	12.6468340952312	12.5019057848202	12.4203808547957	12.5642937726581	12.7013434946607	12.7005673609399
23072054	4.58889651794469	5.11492044942889	5.15721477170779	4.85356115481255	4.9711020442108	5.41664138566058	5.0633556706197	5.29276514063935	4.98730625849212	4.79464683574447	5.08948142500165	4.72746511744036	4.76275422154449	5.1877220461474	4.59780595865056	4.93950384430806
23072055	7.93560215964773	7.66750830183299	8.10755048331322	7.84593399190392	8.01039502068086	8.07166799813022	8.4253329432058	7.97757832648747	7.79754210850036	7.91484127120154	7.7383660217354	8.041356489608	8.03017532528045	8.10465118863348	8.02431564413871	7.88423992223119
23072056	6.34942322610703	6.08757784627237	5.62580648717573	6.01348974247154	6.02169511237528	6.39496197062032	5.75997200933315	6.39793263845448	6.01343866152407	6.14964844867509	5.51714169587756	6.05805260282463	5.83471420946481	5.98280681557636	5.85489065905733	5.96482969605759
23072057	4.48212263066608	4.64784757418474	4.20301725601723	4.56910221837653	4.30186021002282	4.48539661672744	4.23667061706863	4.31117768154569	4.4131149448737	4.28283453563261	4.04464108641249	4.31675240584339	4.02890947427372	4.45797244326003	4.29021235484745	4.18997608559142
23072058	5.67787498056488	5.90154917029263	6.22237064396451	5.9548870695349	6.23311028339847	6.54258582937661	6.09339374235695	6.05387603465244	6.40351158623325	6.02497641339788	5.78722438008071	6.48893277106544	6.57294140688724	6.16638127641259	5.85033376889779	6.12138714772393
23072059	4.19725768542803	4.47712843956669	4.33566606221545	4.3294879357426	4.7204443381025	4.52743179292355	4.49414364400696	4.97542799587242	4.16890706530638	4.43477785994073	4.24759199934487	4.68735635704185	4.38970577490034	4.08734512849392	4.26321361679936	4.15834721570359
23072060	5.54037324962308	5.99704035212676	5.51448335514338	5.69794561292877	5.97282482947783	5.84634796415686	5.18368497932148	5.7973916942944	5.32690950253032	5.83821035685519	5.46717728689647	4.88809202222227	5.43291699368999	5.78986935875998	4.99931928489126	5.78770997469357
23072061	4.4399188259175	4.35888854999471	4.39409984816886	4.50262910356373	4.3929649248966	4.55466654953016	3.81788684570633	4.09326083468651	4.37525835639144	4.34712032405293	4.56416771820018	4.33112653797314	4.11862211013782	5.03889171290171	4.72472944490948	4.30703021275715
23072062	5.51636080239244	5.68099076219332	5.60823399675226	5.56239367449362	5.50972125250115	5.75816465678174	6.03726920272944	5.76561398787499	5.48535640103357	5.98720417536812	5.69462759148615	5.90561421547998	5.69187295510864	5.77407547826961	5.71590919140947	5.73065851054836
23072063	6.5745682589413	6.77688266415035	6.76266607834409	6.84988681637802	7.11178219503343	6.96489168255679	7.24623044931517	6.88426103901158	6.39838357899493	6.65903859703208	7.05279278073872	6.55347502440291	6.92785851332826	6.70477912849548	6.45074271753827	6.82555315742024
23072064	7.00244953698864	6.93076781406968	7.64025219685818	6.9552443170941	7.14980521026754	7.31725494929884	7.70420169310984	7.20305970417661	7.28986628369795	7.14850999792799	7.27540336661324	7.36089923626447	7.38600339463072	6.8286676566798	7.2897521329678	7.06066547767409
23072065	6.00743558850516	6.32804370750918	6.96791018493932	6.67610307966518	6.8710819712528	6.4136516802721	6.99560770351504	6.95027052586206	6.69546560428786	6.34688369924404	6.63582616568138	6.99021141454742	6.10223368418818	6.6542649303081	6.45349265538022	7.0207226431476
23072066	7.63646335057818	7.58050793808223	7.77420948037211	7.38921323432065	7.63383692351719	7.61523260060701	7.63891927811639	7.30940725315103	7.71247120650533	7.6353724048833	7.44791113853437	7.25656573130974	7.36913786698166	7.54167499351916	7.68501171065684	7.47746364230174
23072067	9.42309352451345	9.68502457705015	9.58296936468178	9.45712178287297	9.31671408729565	9.37096873312861	8.88207887451306	9.13021120088754	9.75027805879683	9.48995773886096	9.54526947807158	9.14437374470555	9.59868059719809	9.59479434369073	9.51434740097006	9.60524805127237
23072068	5.55960340235206	4.57474455273834	4.58288997046848	4.53051872809458	4.59595989572542	4.67581489358807	4.44567556381498	5.28142124862165	4.40373446679354	4.49887137378608	4.49697605027536	4.50919421537812	4.52274072744189	4.37006801814334	4.24245565540321	5.19356667375263
23072069	5.62393875350767	5.74690820879892	5.51353766501346	5.45437769092993	6.25042935695207	5.91058527592794	5.44872605733364	5.79056549928042	5.30538080788421	5.35217550169852	5.60971121537528	5.34818492811317	5.4886573301477	5.8667567763429	5.51918775867761	5.47637265302043
23072070	5.78371723260644	5.88992416449138	6.28935267765068	6.40820936053473	6.30421846843709	6.42798064232944	6.65763334694198	6.12390150578658	6.07029501686337	6.16945567228701	6.29070739072854	6.52458369929771	6.48721225362865	6.17489043581794	5.70994844583383	6.00203342463427
23072071	6.76716373933999	6.08140280025653	6.18290749150498	6.07982373363075	6.31272295344473	5.99859846969876	6.24695380657862	6.10036012994096	6.3008760401878	6.69491530940545	6.58786656930516	6.26029761917135	6.53910205685353	6.38062139372735	5.78895900848034	5.99752330877067
23072072	4.90392145648036	4.81026866578695	4.90962859809116	4.73948609942631	5.18842229980915	5.25006496659143	4.70753756735824	4.99611791685031	5.0260207986513	4.89602039567889	5.03865313852732	5.11939714247592	4.9821696320631	4.77513821443305	5.17600816968363	5.06446989149051
23072073	4.50369594275361	4.81294356716411	4.99285857181725	4.41132291097558	4.84361260607298	4.80724792246368	4.72555677008501	4.4261577782913	4.88832409106804	4.47925914510848	5.11352365351925	4.72606083467463	4.604470639136	4.65060204916963	4.48262887435537	4.58922930056747
23072074	6.13907969732199	6.22067652597382	6.4556201972104	6.56204054731172	6.44802128195746	6.55558325854218	6.78443887462299	6.37204366206257	6.27225520679017	6.52643152406141	6.2900154327414	6.43528787369887	6.20105290828408	6.66765839584605	6.1363823555247	6.36298447051125
23072075	3.8595072419795	3.8559664070765	3.66952430188202	3.9382267243852	4.16365472593906	3.78775362558657	4.11484679609343	4.1766014477419	4.04979646970965	4.31787303014061	3.84769510759885	4.05805569041622	4.22301553489017	4.17393166069194	4.32898309364885	3.93882889001886
23072076	4.96561691387433	4.7273413604107	5.0128245839174	4.97904448069943	5.51236491207724	5.19479508470763	4.87536724221657	4.91017015671753	5.44918918769818	4.66543576041541	5.08997330546478	4.83901232734945	5.50718731401326	4.94195192853875	5.17739961860802	4.76440821080128
23072077	5.02389981209012	5.08054950267399	4.87495170050501	4.78688481654592	5.0233922046887	5.15531305127151	5.19367961211755	4.70303707464658	5.14081975422148	4.84043456904749	4.96218340680743	4.92421792265479	4.80996441011318	4.87647434821033	5.0483173009774	4.47983166417277
23072078	6.13280460893651	6.07081154988226	5.80732771695238	6.04932181838001	6.20961459301593	6.55973107257533	6.59176919252766	6.25283166755819	5.96499585546984	5.35228811758264	6.36545783748958	6.54550939434495	6.38013769022055	5.35969817033342	6.07908330045144	6.046017438258
23072079	5.00334138554324	5.06153491285593	4.909856953949	4.91485613368278	4.8779307920132	5.0959853022713	5.08073872754287	5.10687398749911	5.03144058864042	5.53352822579932	4.80931944405358	4.94747597850868	5.25566243900891	5.25890419064084	5.54956502602924	4.92175127722254
23072080	5.34629190804464	5.02881982239454	5.65130800339785	5.52979450178694	5.5599238563902	5.69715558154465	5.98386151390418	5.24677248616696	5.66279647196314	5.99722789166863	5.64316662250372	6.09383428156559	5.84327712720115	5.4731513985473	4.83151988193495	5.21932510383514
23072081	5.78106451652336	5.05880533639771	4.93838238272845	5.38735716932983	5.3799580653971	5.30098516826012	5.58341084740297	5.14521341218283	5.23360102094933	5.47939788618578	4.70284277548739	5.61254325612208	5.06058567046581	5.21925781678543	5.50657563750831	5.07516783286127
23072082	6.46949585643585	6.23110418491222	6.63255141498892	6.10493045224793	6.10070344191112	6.39904424461298	6.84442432567451	6.63799773374639	6.30348571914054	6.572222167002	5.89531283204271	6.69074081267378	6.14444387600824	6.14836815255839	6.20516422632382	6.53887403437264
23072083	5.72107582510922	5.60118235601947	5.64034573591872	5.54018644214702	5.94007734526601	5.78495078470345	6.0204360465715	5.76512948068906	5.67629461018421	5.47486427530366	5.63132078835903	5.90771335305654	5.48288378733785	5.37638143547057	5.83357663276605	5.78968582815291
23072084	6.15758833174452	6.46701909128754	6.18949873153134	6.55290798760837	6.45916594567967	6.49384189861587	6.72674623274915	6.20967541820604	6.46320323198022	6.21677457059015	6.41001528740724	6.77320776755998	6.461701529884	6.24951539514142	6.77488696357205	6.26034054876039
23072085	6.5878961785762	6.44743932445838	6.5657542852109	6.50580757296	6.76550700214961	7.11404463094858	6.81621333046123	6.78566812525804	6.60202578256033	6.71053650330685	6.32251992640767	6.21695304194294	6.6755359211681	6.48210445404574	6.55926009255948	6.65519099856758
23072086	4.21038114008229	4.53852488382636	4.18977808950501	4.38903085347745	4.36478443264959	4.52911885177088	4.77734460751995	4.23472837147326	4.06695160973284	4.2041077676943	4.28262260367247	4.33981785278841	4.09929189805554	4.35954521935081	4.53481660371226	4.34532786377902
23072087	5.54730227756779	5.19670473530168	5.50221128193383	5.26910920813897	5.65338652922658	5.74189054443268	6.00829815390314	5.91911043148587	5.63325285071292	5.30272054576078	5.53937882816323	5.50276443198655	5.95306621174021	5.43649351923446	5.16735387849662	5.01964177960177
23072088	6.04654054348942	6.3730383690556	6.51273213577508	6.16419254475168	6.23508040148592	6.1289594012335	6.49472924022141	6.50772456321336	6.25057027582227	6.129729876589	6.48303678847201	6.68749813289235	6.29388807446266	6.16475586941994	6.23297852309668	6.22544686814755
23072089	7.29391356628358	7.07565554040315	7.06042934239265	7.21876138355141	6.99793186675782	7.06530226475994	7.27172615704724	7.19916622616802	7.02114079723934	7.17528541146683	7.02609403440253	6.98487202717248	7.22296947399299	7.29287207067235	7.17805917840122	6.76577378219381
23072090	5.95308826674796	5.94682622453569	6.07542186960506	5.72507242650434	5.19062983995459	5.65300082468352	5.77738157453439	5.86182469485438	6.30173429106097	5.844620210373	5.76824726082315	5.41722224136865	5.97968970387772	5.85533895183931	6.30093869718827	5.97079112121322
23072091	7.4714384117196	7.51906501675763	7.86403933126735	7.38865043124025	7.32479482065697	7.28426457406314	7.55276623928635	7.55889357178494	7.707489893729	7.7304391091463	7.74598878237955	7.53922143422833	7.7547438178177	7.68152292786509	7.65655863243532	7.38847109223935
23072092	6.28211952368027	6.10692176712919	6.51517858271978	6.3340545312595	6.71208706909355	6.56703618469914	7.0416219252566	6.52469577345966	6.37089395168721	6.41233924752721	6.30766365735881	6.39343564393191	6.72851276374703	6.45845387043922	6.48974941977922	6.39047363740719
23072093	6.18733193427019	6.10532501113181	6.43976575208035	6.0317370815475	6.21289270175536	6.23218691021028	6.69868063708687	6.3063789879618	6.17183024480288	6.1948083539231	6.33563592249501	6.51165285865228	6.45411155002894	6.25901238841135	6.27102794657939	6.15812153064889
23072094	6.5703218158062	6.91802648327775	6.81111439338209	6.87600708945707	6.62784841870286	6.53473261883041	6.88085287967603	6.14210617339304	6.91489338608345	6.49135979156136	6.76316857686678	6.71269431896034	6.76305468951117	6.78609337070125	6.81538636162989	6.43700250974818
23072095	4.71177348946311	4.82764227256083	4.89877348584991	4.71615962460265	5.18279498098168	5.45146072924937	4.86992720934628	5.16277672327089	4.87472065762245	5.05171644269994	4.92176220478833	4.8848634342327	4.84640010961991	4.94894791301694	4.82316877370261	4.93821189568525
23072096	6.77682779569336	6.2589253754565	6.50795985509922	6.57235933190612	6.31271852568337	6.1970534824039	6.52985931157627	6.74128742891438	6.33252691071283	6.03882809235125	6.30414184070924	6.64665170482741	6.16619359675657	6.33912075879678	6.42067369685387	6.33538073297801
23072097	4.88540121435524	5.09875922271678	5.21573307422975	4.98104815776105	4.94267128206436	4.78838391304233	5.38793163861042	5.14964218826637	4.9550202690961	4.83554554042185	4.78395030723827	5.27494274112306	4.94754609066518	5.05180655760698	4.85169270856257	4.81956465588903
23072098	6.49904150923253	6.30083928435388	6.7132603393102	6.17533674006626	6.60635949259328	7.01237917778653	6.60539949776878	6.68413685427316	5.991501365215	6.69964932487561	6.1880942427117	6.19855761005612	6.44923400192896	6.33413498830178	6.62766419152788	6.06616290794943
23072099	6.65712506097496	6.93888343065219	6.8579526614112	7.14943226317768	6.90648465772604	6.97247618814896	7.33706195775321	6.88910518713597	6.93547370927386	6.67051393333866	6.90923060564316	7.3588190133447	7.28601355743069	6.8730030810719	7.07240419120671	6.83029828005921
23072100	5.47378808482994	5.87047410448892	5.83852983220311	5.69589908034623	6.15245088362007	6.31371434628623	6.35170173923604	5.81004801982254	5.51506556435942	5.55298354664814	5.79720659946339	5.87419502216793	5.72092766560453	5.72274136386658	5.63727604400741	5.51868276630028
23072101	4.70237833312483	4.20714867247872	4.34624467278065	4.44468149096215	4.05892103169801	3.84850376152803	4.1554144152316	4.16283303148469	4.30241414356162	4.43243362624044	4.01445058956857	4.52885350777565	4.59223370649824	4.36605045585339	3.93107512075248	4.27414641754191
23072102	5.01210045741027	5.17567038885564	5.49639301350101	5.18465702038756	5.30280917782518	5.28418068044633	5.31968542115757	4.98325832025291	5.18122082560782	5.02565059739555	4.99455718220326	5.15948034632792	4.80991267342851	5.18304913309861	5.13483071270087	4.96947159681208
23072103	5.40964288720769	5.08361490159283	5.53652013663224	5.27352691198879	5.20433303615933	5.42759139713793	5.81348022832476	5.70619562348685	5.49819613154719	5.41496567709886	5.3708469414383	5.32058647671333	5.5132309500956	4.9235498903406	5.14467171648562	5.06162939612963
23072104	5.55070863061096	5.40400206930543	5.76012010993611	5.2335601742651	5.97571606927066	5.60323425474504	5.89837316367988	5.9930696473949	6.01205038162734	5.70890329694732	5.94141492556341	5.74555702290825	5.55300984182078	6.40015603343229	5.67440377676922	5.9382559453721
23072105	6.05880224547106	5.98695422173758	6.37849046093574	6.02789008193042	6.54132865629522	6.33906072635515	6.87257353242686	6.45711613821965	6.35052622447936	6.27291472827838	6.30944932201257	6.34588826189065	6.71426913214586	6.31881072389133	6.3300965648608	6.26672145985359
23072106	5.72428996451284	5.40662242480018	5.97073982550851	5.76537922294914	5.90644170657567	5.55453353182304	6.19995903211034	6.08413629301536	5.81861764684014	5.73369242066732	5.88524398607107	6.10607507618969	5.91292746800103	5.58271616171272	6.00680425959964	5.80784288165094
23072107	5.96953538196411	6.22870655673801	6.44416191386329	6.25747329764671	5.81740022481463	5.98408500838158	6.57279433690185	6.42674922211946	6.33758469801061	6.22339365130316	6.36816384188928	6.45117664596393	6.35476610489831	6.16031938253846	6.44355525022663	6.15230454238925
23072108	6.5340541543402	6.2924387841752	6.5947679901503	6.59325309907479	6.7755385851958	6.50855964604142	7.08368966722597	6.61481994780105	6.52414733104933	6.50967914805455	6.60277306647151	6.72270406946796	6.67985943389313	6.43346412431182	6.62662820928069	6.42291243574311
23072109	5.7319293784168	5.73175147899757	6.16859333906936	5.59615903575576	6.02124054720102	6.09406295372668	6.06940892221645	6.03278549982379	6.01491368957682	6.02743067095986	6.02887839552959	6.54036158364525	5.58052560372915	5.77133987479357	5.62917843256759	5.71465552475926
23072110	5.75921844995108	5.84358328455205	5.79571082635734	5.80611893949571	5.98705136662928	5.95530453701369	6.48860596035873	5.82165455740075	5.71527463666277	5.79653233743104	5.7020694357712	5.8913634881332	5.81589024653506	5.55001087060065	5.49472280562124	5.84631193600771
23072111	6.24477996700344	6.19071271408348	6.06940322592006	5.93317140507576	6.14316562307488	5.80953768536416	6.61023915637088	5.85987514043867	5.99337021656942	6.09601619943934	6.03670297425698	6.02740037203837	6.14387143321413	6.25481067448017	6.27453657925452	6.26709115700609
23072112	5.38834418280806	5.38678674153533	4.86691289496707	5.35517934068831	5.06598378327425	4.78568117650373	5.22618040321581	5.07643658062002	5.06322292977918	5.52027201162516	4.83875679525537	5.31697422458568	5.10920353326779	5.52115337029922	5.35480539091386	5.12656068239033
23072113	5.6868918658941	5.97002208402997	5.62455456517766	6.13278806899453	6.01566161493106	5.96570995963189	6.32003397498016	5.87939612473338	5.79508638173561	5.79561922633049	6.09376415959355	6.34388036764268	6.41357928860302	5.71461283527532	6.32710720469099	5.51936769177477
23072114	5.89677923656889	6.05110599818894	5.85002163620734	6.08051180565931	5.47153275962068	6.09767965145932	5.86584142313712	5.81130546728507	5.92913444927465	5.61755981619885	5.75866489091439	6.18597617631549	5.72848192556854	5.80553191958573	5.83972011949434	5.90281567666665
23072115	5.33906298315809	4.79232154431999	5.07749320778792	5.35357794602818	4.9847361469449	5.36808234751581	5.6864308990737	5.13380896528519	5.1232578014218	4.96376472026118	5.04273117558607	5.50960718162606	5.1867038066826	5.03439591815047	5.12509494062095	5.04114113402488
23072116	4.16883681756271	4.20647547307739	3.93110063877116	3.94334725543177	4.05171820154391	4.11305910785681	4.2941282144986	3.88912968289516	4.14548567840233	4.37064079209688	3.73810957117083	4.5786509445657	4.30285807976389	4.27713815906139	4.05865541864183	3.97148047837816
23072117	5.70914227021216	5.73119941564833	5.8729742866427	6.16104640479546	6.14199882181158	6.28408673106629	5.98436647170213	6.13988749358273	5.87622018172781	5.921682108177	6.11962130403277	6.17050706310759	6.01181992579526	5.98914228030967	6.23374093715128	5.71866461327485
23072118	5.14017358567462	4.89923338082134	5.33393124882019	5.0606383899071	4.98388978781294	5.21021467992192	5.68811814821765	5.41172066174618	5.28041335964219	5.19643937941986	5.15292316152582	5.09563574009338	5.26641310977235	4.92176787397733	4.86765961075717	4.86159696590061
23072119	4.54152491336677	4.2553172494675	4.70475818347531	4.61297355436714	4.65177346897043	4.61203099311966	4.99858075926082	4.71034077324047	4.8396494263503	4.61154867754665	4.7247508058931	4.952944143412	4.74314949223194	4.80729403764534	4.63675390673749	4.64150364868457
23072120	5.62530232863494	5.51715685515399	5.60872676755882	5.26320185001437	5.45857162181934	5.47337920083539	6.0905963077953	5.69060678675913	5.34455642487583	5.46642858352008	5.52917113062352	5.41571820731595	5.47918704233278	5.33558197970865	5.47248024321994	5.14159367967342
23072121	7.4088950431891	7.55509087206757	7.7165990397314	6.98118593224668	7.3904967084452	7.4619516476605	7.90596976526662	7.75329628876285	7.49466884120149	7.34483052079501	7.63020356893248	7.42121655046225	7.54893746760085	7.47611583313971	7.53035703371763	7.27049132752018
23072122	6.55747003326948	6.39285420425129	6.82725272393475	6.57991570718116	6.93563457019253	6.82642504544431	7.29653097311709	6.66600374288588	6.56553300868469	6.77285760165104	6.5203222768335	6.94305879744425	7.0836180073952	6.54318515151283	6.76255356675769	6.84810493597717
23072123	6.30228308863603	5.99529773075992	6.14924025331893	6.10247849241855	6.09373904665054	5.9042195523768	6.69014778370357	6.34497861027433	6.02798986467871	6.06425798310252	6.22266310885467	6.62777939980841	6.22568098316828	6.18048334125584	6.10280589981745	6.00667960677298
23072124	5.55837200317047	5.52506358375377	5.98779605832863	5.68026430254884	5.51853532428452	5.76374387326254	6.25055060096428	5.9121938282339	6.23891662559804	5.72070491439105	5.78032297627454	5.63896541814805	5.87090368846239	5.65491857674926	6.264808986968	5.78295556902334
23072125	6.33476110057272	6.23075834475236	6.6089427622037	6.1419572646652	6.52552156812374	6.19761693825135	6.73146350641467	6.67845857265701	6.47594907386926	6.27143745206326	6.41666059329104	6.65280231468633	6.38958451106642	6.2267354406101	6.45403359302752	6.38103340173676
23072126	6.37957411218104	6.25676975207789	6.55168897670913	6.26028944677048	6.31972014705169	6.20153664971904	6.97606335019249	6.76010568514492	6.33106721212016	6.28888288552589	6.3963300406541	6.88048459664006	6.46788926031473	6.22557423613546	6.29763659483085	6.24437455074861
23072127	4.42221666804987	4.71143646519616	5.0285587037225	5.13307724138747	5.18537038719407	5.15870641575035	4.91707266297054	5.01102452075632	4.85988281157582	4.86060161484033	4.78843169084144	4.92641986827579	4.75137492897722	4.38574284294257	4.7178195013934	4.76672735359135
23072128	5.47858247606204	5.17133828012335	4.94646621171371	5.07326622766119	4.9563983699951	5.01348672294667	5.597677657347	5.18275563863754	5.1145778469226	6.17162757321802	5.33847171093411	5.20151853391707	5.36520077725469	4.87430509395996	5.2862759627755	5.22550210663604
23072129	5.93968608472881	6.47648473622579	6.26955298832817	5.94508412947062	6.53317240629177	6.79645463633796	7.0034833710856	6.56229430206999	6.28259103812421	6.52993595950236	6.16456006866821	6.48877971600512	6.01636574829054	6.22131139522165	6.29176365552204	6.3171306031718
23072130	3.54717791377158	3.82668267751533	3.67311332319867	3.70462181669979	3.7900180421538	3.79363654117067	3.50143684609497	4.00525852935069	3.47166938322693	3.7078269390346	3.62419375976625	3.58684317009707	3.85395361690429	3.51552392677421	3.79626265303124	3.71125104083548
23072131	6.47063597172543	5.81062593540238	5.90203216561922	5.95670142558401	5.93059500273827	6.44525203343302	6.152549320797	6.16706516385327	6.05453647113488	6.05768330723424	6.13580292166189	6.54964391729588	6.04948959074294	6.30542026437888	6.28189106707549	5.97340065131843
23072132	6.24539562247702	6.46928874464606	6.5954048410724	6.42300555614306	6.58155292114217	6.76608902680474	6.9228379375345	6.92017074221401	6.34341207019572	6.70006126116835	6.68044177726981	6.41329428811108	6.84271010849502	6.11577398847849	6.15867098956462	6.72234719033912
23072133	4.06574591555464	4.58070777943426	4.25030106207753	4.33240219841395	4.44575505031456	4.32785444411902	4.09396766893326	4.43606793902074	4.4235018573872	3.94626329366644	4.3171321410829	4.3905083131444	4.17442446108848	5.01199808057244	4.4858411868826	4.19495246753101
23072134	4.40986599307426	4.68167797185418	4.50860352792681	4.47420498213144	4.68653703402687	4.66678722007975	5.2286305870198	4.6376480074274	4.55106563694803	4.39840937687957	4.67027859096424	4.53585211707258	4.36894900299393	4.35866594081319	4.65287480168259	4.57342799184343
23072135	6.41774803511328	6.41301995719744	6.41503616019532	6.24822854019061	6.5159264337494	6.54608515131667	6.75447115999175	6.49188096271976	6.2952325735121	6.24450134748046	6.37922984686208	6.37558924710558	6.48461159151461	6.34805484995579	6.28390454969845	6.01383760197105
23072136	5.0213657063397	4.69135246567611	4.84389824778177	5.01315855890932	5.25297681899366	5.9559798960218	5.15651716655512	5.15882055698266	4.91513584556574	5.32892679325645	4.71090367337848	5.09732481282183	4.89103513116139	4.74169627638513	5.15028149740854	4.68604441068236
23072137	3.66243695687786	3.97848739521097	3.95848203910707	3.94243674607774	4.30765344187608	3.64580390064969	3.69408339847471	3.95331491303041	3.6569278179314	3.85149064422966	3.88595457768379	4.23005174746454	3.75609604133251	3.62115515584912	3.79145558582331	4.07126300294613
23072138	7.50073169080931	7.4932324173399	7.62953945308941	7.49860816021702	7.58627717542405	7.68513237954383	7.96921353020215	7.75353532905121	7.34226022996441	7.41326019769263	7.51955789825989	7.80753951609616	7.35513144834929	7.90733660736972	7.46572093666781	7.08594777411103
23072139	8.08058698308063	7.98066448277531	8.31046080110081	8.23797402247706	8.25168010606932	8.35060665915249	8.19317252688175	8.14994917955989	8.27252620204477	8.40229078028739	8.13103504872576	8.05692666105131	8.27445798709591	8.24473230399231	7.86842757926501	7.95534802056052
23072140	4.34244209301618	4.44479091706548	4.49777080299221	4.51362893212081	4.51450253678942	4.82695972558201	4.80507541703024	4.78255559054197	4.52104289789991	4.3392110601024	4.56730490819693	3.95887962521934	4.3952625265475	4.65641150470806	4.50190663869554	4.47384173287506
23072141	5.86046673002324	5.66612957083411	5.98675694231526	5.69724245759411	5.68616493260786	6.0514008738776	6.28676144121361	6.20372309867057	5.99395718176098	5.86907378200986	5.86144524214618	5.815928884442	6.00163432868007	5.45201850074941	5.6177839538297	5.44093186318484
23072142	5.55070863061096	5.40400206930543	5.76012010993611	5.2335601742651	5.97571606927066	5.60323425474504	5.89837316367988	5.9930696473949	6.01205038162734	5.70890329694732	5.94141492556341	5.74555702290825	5.55300984182078	6.40015603343229	5.67440377676922	5.9382559453721
23072143	5.56880534858695	5.39298536041165	5.74337072019966	5.90636569174033	6.19598262580941	5.53099560569882	6.38836464886093	5.85467558012598	5.73393637260315	5.71905260608879	5.92330445158503	5.98826446026527	5.68310920609639	5.97057117112188	5.78901091289122	5.95179987581571
23072144	5.37200188995826	5.77133553122663	6.09326930949224	5.75386245585608	5.95313040153415	5.54215421789401	6.31328803520953	6.1180693696701	5.84297109111714	5.74230606074622	5.86563970738204	5.82003054974912	5.52028405734503	5.8307639417037	6.01397482130133	5.8045567153785
23072145	6.8062697595853	6.78939496010272	7.14018819401701	7.03750290251554	6.72783753697253	6.85921384223572	7.4117939247726	7.06898229387764	7.1828024416721	7.26209040663082	7.15734959158933	7.34429565034742	7.11785654048729	7.10956802043647	7.28164526751802	7.02416340668946
23072146	5.68468152916764	5.92296579790589	6.16494390731892	5.98580067636166	5.59783769769078	5.99202021101834	6.56390329847202	5.93871010023352	5.96048087773482	6.01269060116656	5.90220907276796	5.63445896510217	5.90099430549348	6.0003302625775	6.12946568321308	5.71451881185599
23072147	6.59949582686047	6.52568035700519	6.50669913886697	6.10523331065495	6.52666339180786	6.32830488842075	6.66334338481632	6.31634314183477	6.48136350635494	6.35471196288256	6.16191824461978	6.3843086330655	6.72012185203302	6.18901695881712	6.35255597598446	6.09403443713081
23072148	7.54643386936358	7.75701752151691	7.27609375429743	7.6865925682216	7.6420425597536	8.05000068481275	7.94393411139507	7.67464103068548	7.43301248705289	7.61314212695566	7.2192025878981	7.54301023790171	7.58894470079632	7.87892564828806	7.38845550277752	7.0179513135788
23072149	6.03978295597819	5.74095533268169	5.87783331487172	6.22814395499815	6.20772468707382	6.31688025257953	6.30789370758783	5.81896739974603	5.81788320856764	5.72666833023247	5.78863830872771	6.20808941173879	6.2157000853244	6.41451479932763	6.25097431520116	6.22790056280579
23072150	7.11055317530764	6.9886807451821	6.78947523129132	7.07042469866961	7.19220824971855	7.23107035113919	7.12677591337086	7.45009213004344	6.83464057929888	7.21727702472586	7.06369864018583	7.0489681285569	7.36297664184992	7.03035713696839	7.00726117068137	7.14727971908574
23072151	4.49345153265341	4.81952122857439	4.47295201504074	4.66908597465933	5.09241384411594	4.67251909792923	4.37464077064889	4.46558511506856	4.37866176585657	4.69118610017297	4.29013895479204	4.43628680839143	4.62943595659503	4.50563656067362	4.72414480255069	4.57575171684565
23072152	4.40210983046885	4.74652835184066	4.36334592327386	4.71525268770905	4.60286641329156	4.97295689492961	4.56075357246948	4.53315116610474	4.720022199005	4.47185507381128	4.6123710567058	5.1257796631819	4.9426834445205	4.54229277001927	4.88552643886865	4.58201547138443
23072153	6.02597365524763	5.41714863794084	6.06355705046246	5.73850271178344	5.94552002736663	6.08041131892893	6.50467151724252	6.31142705533646	6.13268431403441	5.97926733971992	5.98633669297665	6.16569169791072	6.12745287546437	5.66741708217609	5.99988071184939	5.49463261331304
23072154	5.6868918658941	5.97002208402997	5.62455456517766	6.13278806899453	6.01566161493106	5.96570995963189	6.32003397498016	5.87939612473338	5.79508638173561	5.79561922633049	6.09376415959355	6.34388036764268	6.41357928860302	5.71461283527532	6.32710720469099	5.51936769177477
23072155	7.26668498351831	7.26065253346354	7.40221878737096	7.18479516492989	7.42307444898335	7.62321681599069	7.52694113835611	7.7179252430783	7.07834237031457	7.36630242807235	7.33522528714407	7.62598499361695	7.63559996508832	7.38319074731229	7.1427847724393	7.12059835814205
23072156	6.09125347977292	5.98683468882619	6.43409747764333	6.19186801905124	6.57546025851538	6.36086844750109	6.95989394902758	6.3318402753592	6.2582453131009	6.2327865763663	6.20678536150104	6.16064571380927	6.58922799936045	6.32538032388803	6.3863054467611	6.24795370093843
23072157	6.62155623706915	6.63945619576902	6.79790550891177	6.61349182389474	6.828298838425	6.74567981717217	6.89782056844041	6.75081401689454	6.21757002349519	6.32888259623014	6.29465203712483	6.5528080744843	6.35034354324182	6.67921334580884	6.54106710455031	6.63157249258188
23072158	5.03840895041199	5.09258096406587	5.00415933799037	4.85166637364345	5.08374972585881	5.03382517466188	4.94708310678657	4.96913317448827	5.07075598431704	4.80209994729298	4.63903703845642	4.96140786104295	4.7089312367661	4.96502387111006	4.96399376672542	4.87274909099878
23072159	5.8024520470241	5.93744712867004	5.60612883366524	6.00021169910379	5.97676541803983	6.05188762250607	6.11034399576577	6.12825781109394	6.18681104287949	5.58690117798827	5.74310350334463	6.11179686725726	6.21522678915017	5.62657787038483	6.04264027932654	5.81660346365996
23072160	4.95169605661395	5.37735972638953	5.46002878530663	5.54095197024433	5.4897188232296	5.79057123034927	5.87639816235561	5.37828445661237	5.42718339646691	5.14821702321833	5.33029044711394	5.32305281000281	5.37669865319546	5.50505053785019	5.33056370832681	5.28321372811096
23072161	4.80820081502999	4.77591078379727	5.1497189337064	5.06044943197427	5.07118991043519	5.02557632570028	5.431043686821	5.11450347849332	5.25301180665133	5.05394165029469	5.17736820167619	5.39643986010987	5.19511938535872	5.37889698115217	5.10338372363457	4.97405525953014
23072162	5.60639755989474	5.35591550294335	5.67659277722678	5.17402568446837	5.44548897068845	5.20399722919686	5.96697350396378	5.57212707154451	5.37939623584375	5.2752652211471	4.94680380794731	5.43825585212569	5.44752163551526	5.41933144166452	5.67669571237718	5.20287887908219
23072163	5.68028183954364	5.71732509944473	5.79076734261619	5.9177136096391	6.17805685595039	5.90815860560499	6.32871888254908	6.03091181417736	5.848939807063	5.7389181026299	6.03252419546734	6.22433908758517	5.97309791712044	5.73505563581703	5.98209684057069	5.60400796578071
23072164	6.93302196683894	7.11407895185898	7.26773671141869	6.76504732339672	6.77874141908388	6.82781471184489	7.30555737740827	7.16201986362052	7.04487047653039	6.9185252956941	7.17835492789105	6.94450011468773	7.17288672869811	7.0333158213772	7.08432770460163	6.82566044084393
23072165	6.9329869743483	6.8817039469613	7.11726163653292	6.95850841194238	6.8489233852308	6.78301525555829	7.08399178738063	7.04914553178945	7.04236290622432	6.88652305198417	7.17829964793741	7.30901750177888	7.05293295978811	6.88268651918016	6.8453702343153	7.02709616782878
23072166	7.78042796157043	7.76948104611958	7.92439344201777	7.73557374475435	7.61440779358893	7.69350390569903	7.7609773929408	8.09643676703633	7.58391292853365	7.79008812046004	7.60436739276563	7.5670376405172	7.81667104872152	7.74118721606334	7.77237788497436	7.50216051879592
23072167	7.49188781840836	7.55567590535531	7.53784740106901	7.69578733747523	7.56976327918612	7.54173612941928	7.84406579317942	8.040118535672	7.54028007629354	7.50894285291287	7.69502852029416	7.77394998861187	7.83030748833352	7.62709058742782	7.66089153822958	7.26450712638943
23072168	4.91077050040847	4.66102774125959	4.89736146188381	4.18802985264719	4.65274111891485	5.39715779063052	4.79076408133954	5.04021663610081	4.41446838784303	4.65814671370364	4.80044230420252	4.63778005106662	4.59120029644936	4.98433918590592	4.62434524955375	5.11177502826151
23072169	5.23115562245084	4.91419056790372	5.04094039537445	5.14521930988506	5.21042806106742	4.98456683514456	5.02696532205333	5.30397003543584	5.03590387209165	5.20694493303123	5.00925245431409	5.35327094971868	5.57624960069683	5.16738824220243	4.83479987040364	5.257939238484
23072170	5.6853693931174	5.50058275208821	5.65436437203716	5.82979187079441	5.9436298437794	6.27422587382463	5.7786240715326	5.85329788836728	5.44311924356219	5.59375350725219	5.84447988622666	5.79025643428633	5.93652217738175	6.14025893773053	6.01759418419829	5.87924068338079
23072171	5.48319015936317	5.58615136920559	5.58509457585784	5.79396212001542	5.36051248015019	5.28036773424359	5.67935762831568	5.81422133858106	5.28222669796357	5.40986373995628	5.35183918660624	5.1538192965545	5.7821724978452	5.76179408348665	5.153856997887	5.63827941858062
23072172	5.03824492501124	4.68891073124906	4.62136647249398	4.62416097790289	4.95560516059195	4.94772131839833	5.28390761860062	4.57602652766422	4.63211723172643	4.27432472027939	5.09996318373074	5.02542896108021	4.34821681872249	5.12189896533533	4.60086600093606	4.7283282733948
23072173	4.86362003046265	5.00536396568659	4.66715106621389	4.82597663880645	4.27613233524511	4.97609698364373	4.78820433398921	4.7317984740059	4.64697597230196	4.76934131333627	4.84976133537746	4.8138716552095	4.84699746906772	5.07142925969802	5.32763782044476	4.55275604296072
23072174	5.1522447088925	5.48855202175475	5.47536256685425	5.0369634549717	4.97194055943591	5.18459095789762	5.10022425541473	5.18517427646284	5.14642629575383	5.11284026912192	5.28742904216656	4.97243355487791	5.04098463702881	5.22938360075244	5.35324277478586	5.0997433323927
23072175	5.45048167208399	5.42983300449664	5.18145730321595	5.4643868297857	5.44510123044642	5.37291101492778	5.62609758675038	5.29423767913923	5.52107811307715	5.495232846447	5.36661766404618	5.21155653661191	5.70931940014259	5.3863765214915	5.21633185883288	5.24554815385846
23072176	5.8262210290193	6.03948723897434	5.59383980825778	5.94859807090198	6.15137689283945	6.14704781249327	6.05087587365875	5.99974638172038	5.86060491095364	6.0136748613522	5.79113960381914	6.17675078055587	6.01100365005391	5.73333990192995	5.90382907806829	5.63709917902141
23072177	5.58841946126871	5.8894972070427	5.65013166435764	5.94091578100863	5.92653410645723	6.03637634154595	5.78108737606559	5.60837227801217	5.61811947253501	5.71331834197205	5.98489818558934	5.86616880071446	5.65596732060479	5.61967831940809	5.76958079219788	5.64866405988513
23072178	5.23646383687331	5.31335799763555	5.36029984944745	5.8339750526302	5.31236667967451	5.41623423220401	5.30465034290234	6.01073982741667	5.62014495066355	5.63791026421498	5.51363979156129	5.45634779807285	5.43055486389808	5.78001363115387	5.31033707717684	5.46712340782128
23072179	5.06121918961319	5.14460007327978	4.86644398332042	5.27994617815715	5.10026277304265	4.64415165947463	5.49618486091601	5.46379353966033	4.91520210780674	5.223569704771	5.01716303532519	5.02897753241805	5.23512493487545	4.9670393553418	4.91248333554678	5.05077130495218
23072180	6.15758833174452	6.46701909128754	6.18949873153134	6.55290798760837	6.45916594567967	6.49384189861587	6.72674623274915	6.20967541820604	6.46320323198022	6.21677457059015	6.41001528740724	6.77320776755998	6.461701529884	6.24951539514142	6.77488696357205	6.26034054876039
23072181	6.47945859635193	5.94279513581297	6.51622089905656	6.19674796203121	6.37145345722813	6.55192371760781	6.7206568160605	6.74072835586691	6.40198479511686	6.34795009139045	6.38035354362595	6.36611494062762	6.82440653900615	6.3772661166919	5.98593196279585	5.76420955452067
23072182	8.44413096024904	8.61907453675501	8.70939849287466	8.22060744745785	8.35307538689768	8.30332816725056	8.82853684331664	8.57450881579417	8.59750297225899	8.44150476160247	8.59890378663408	8.70645459754526	8.6417188897455	8.66955145722292	8.65392562877095	8.26108712720221
23072183	5.6861870565433	6.15663785501558	6.47911980936489	6.1778418092135	6.57148764551609	6.50413285319874	7.03124748665637	6.18754731075872	6.31902659391278	6.10076461953905	6.42098771838337	5.77445512110214	6.00066114869104	5.97148549072788	6.42566976522706	6.15619401052904
23072184	5.4468240210782	5.65005566946457	5.97961929421325	5.70372087552284	5.6826024601715	5.53345319447768	5.95843454040769	5.96416935930988	5.69949625964515	5.59889175208209	5.9287375868568	6.08102739061375	5.76199078083078	5.6832931351726	5.73390534567412	5.69354957451567
23072185	5.54754145754127	5.44414800957667	6.02649425889203	5.9742873180249	5.85688197275183	5.67634193190194	6.08743662407403	5.97172818492298	5.72707017110053	5.65262850362902	5.93656256880661	6.22577275702715	5.94849281829595	5.61291673431819	5.91867012645819	5.80720758672412
23072186	6.2153197749561	5.88120708931918	6.33535467683615	6.03861912711097	6.33302216121997	6.18521549793822	6.67799809186424	6.41659428802247	6.36991303879539	6.14998362397807	6.25965387354025	6.34621645251249	6.15259765707692	6.11516717558582	6.3426690948304	6.15592022065873
23072187	5.32008542332659	5.71409431772148	5.48022480483186	5.40139852027829	5.57236831570932	5.62475667171104	5.77484216829106	5.42177069000612	5.67361937122547	5.84209604446621	5.63456177346911	5.76886257280132	5.42955784378539	5.52827982854477	5.5371934740954	5.7042924053612
23072188	5.27153623521093	5.59483484636181	5.43510446650791	5.28273756718697	5.77872292631864	5.29677369611657	5.09561038848918	5.64028768243627	4.98648844742476	4.80792941590334	4.81029245669027	5.31535236576928	5.09239708282141	5.60344203056105	4.76757938909157	5.25085308923087
23072189	4.32860931853824	4.60711706762966	3.98052655700718	4.35817969729974	3.78063273530968	4.39645788042785	4.3314113050028	4.0809069671457	4.24067935822754	4.05789570346418	4.11935870524631	4.12254257002772	4.12671170525345	4.05508319336144	4.17365283086097	4.14725371395522
23072190	5.40016779634152	5.63500594447589	5.0384298586841	5.62963996450543	5.6359248804598	5.61520755433087	5.45206908958571	5.87035287477128	5.67880054156051	5.07063211869321	4.94097171313278	4.90782116015329	5.64377719196417	5.51993957394945	5.0708876449058	5.49767610926719
23072191	4.64944906935088	4.08029107626871	4.02090943085468	4.3429571770383	4.48157748388271	4.34413842149804	4.07045842603226	4.02702262726578	4.30399547165324	4.48635961916419	3.95060583620607	4.19340219409603	3.81397480922826	4.21771378602826	4.27704659643672	4.19031064794311
23072192	4.99453999646538	4.92681989084991	4.75321452055005	4.89586722155612	4.57350612136733	4.91475646855964	5.06901428359145	5.06362887089199	4.93336201532258	4.94977290243509	4.7926617677844	4.85509377766496	4.87974817036858	4.65405696459373	5.03983161910885	4.97435263445801
23072193	4.59424873755952	4.56708388453737	4.28448567623939	4.59256115380044	5.03589982872528	5.21951973525413	4.94279713576127	5.07718580846747	4.91081922790157	4.55701658629556	4.99019350103214	4.49865216277956	4.61679084130088	4.88418141408054	4.45702734620877	4.65104571778567
23072194	6.60735704322941	6.83086206971459	6.85542867120866	6.77870867101074	6.98459662030895	6.94166925004139	7.16446155098572	7.15816488089601	6.79862206546083	6.76469149053443	6.84425974105591	7.01423753142849	6.9589544506322	6.87016967641942	6.66250408358141	6.56466567497383
23072195	6.15557582511722	6.82939740156304	6.14262422692887	6.52780727059999	6.69548759452044	6.66707265937932	6.59630764051679	6.23128575009957	6.68193655200318	6.53667426851207	6.3158975875387	6.52881708547237	6.48093032039207	6.38970704936095	6.76422170245729	6.49560722361726
23072196	5.06823042123872	5.05985913699969	4.98048469399323	5.07267485457328	5.3968374440814	5.23814868358847	5.22992146381376	5.13735932620225	5.26095824496159	5.21752837690451	5.10809614468282	5.1618680102613	5.10785398154123	4.82821921602324	4.77317180674443	5.12418072985326
23072197	5.22486248322985	5.49311535858538	5.79145547900026	5.37952288718985	5.92911301082525	5.80223425583206	5.76745658599551	6.02406881296567	5.37049976488478	5.68756814185406	5.21172250927024	5.58239439268075	5.54410832062145	5.53092854264498	5.61233417738614	5.65824444434188
23072198	4.31646671590775	4.32914100491143	4.14879864292867	4.49455176299878	4.50825509514231	4.37307723744437	4.14092315700584	4.42610101837505	4.55901283797545	4.56394179140239	4.32825445116903	4.62280173988171	4.3540233200485	4.52250092953662	4.19704421184887	4.42003199002861
23072199	6.52505000710985	6.17142767408466	6.7134576442499	6.31918059310073	6.32320234220814	6.54610230461491	7.02653952724994	6.6550655143737	6.53250823184942	6.47037728362734	6.49359677736806	6.54590532134633	6.76534312255235	6.2534177469164	6.10309419724603	5.97216425431254
23072200	4.84099840861593	4.66521926816903	5.08508335683427	4.98961092093614	5.0263989634469	4.97798145898277	5.50985960899447	5.07260343231362	5.10843530509238	4.99489219717147	5.23321657678708	5.32820650778101	5.11777498670841	5.3528364632326	4.93519096781011	4.92926431254184
23072201	5.47159157296098	5.35448325444105	5.39441037941838	5.06941605197377	5.40142923567198	5.60502227634393	5.81149661228929	5.70881052534365	5.22604760271367	5.16225986821045	5.2839748032269	5.28891711720901	5.32548027537949	5.31792123799306	5.25928580087986	4.96918651975305
23072202	6.91591457221528	7.09334722390797	7.22758417128494	6.4010859206844	7.0424672293424	7.00236886780506	7.33983879018267	7.05017579071499	7.13654031236036	6.89681988682742	7.17303217497216	7.0691609077743	7.28343760495703	7.0125840934262	7.06632103335407	6.79479166761722
23072203	6.43274421620558	6.53991667773567	6.5658290907569	6.29338102277262	6.70481972914725	6.63230861401497	7.12378732839408	6.58209981674258	6.52304461060764	6.59765216370688	6.55068831293359	6.59759420135147	6.9929739474529	6.82171814527094	6.71299632486005	6.56600698855651
23072204	5.98039593729765	5.75592080543144	6.28277899116005	6.06465373180006	6.16433779894594	5.93262666416996	6.60114338316173	6.2666534407203	5.88663145957982	5.94400400434406	6.10565947749437	6.35170976691755	6.06728199205267	5.95821224859002	6.07682302030209	6.09867071172809
23072205	5.55063097208723	5.25571518939248	5.24510585523514	5.62215828565251	5.29215096905945	5.40300228523143	5.81835623436949	5.7878499244699	5.36840778588733	5.45132156428205	5.2990101815857	5.75851735858426	5.37144564508828	5.48138698452504	5.30592456021459	5.26416591469054
23072206	5.35741430139687	5.5301240551443	5.77444075438219	5.68368928860026	5.84640187352838	5.66304233498848	6.04739762292962	5.87645628886994	5.86338054027946	5.6142886794091	5.7240436809503	6.00405181379421	6.21088806550733	5.8375304847184	6.270945981701	6.02502209163138
23072207	6.2514544736952	6.23576866221042	6.58167818614689	6.55185211734218	6.2692096668822	6.3007038343656	6.57886042065386	6.5447560864338	6.63210709314067	6.44216480594433	6.62197537303216	6.7513908820476	6.6298695879398	6.50906969921024	6.60086237984748	6.71993265995346
23072208	6.65615548079555	7.00853411096283	6.53478115304787	6.83240538222052	6.7212881953975	7.22417066303794	7.18888824656524	7.03964465987212	6.63056104342622	6.98688542213074	6.59762066703028	6.96905592811727	6.8632173558045	6.94313659732747	6.73216116723703	6.46451011640855
23072209	4.21662531192004	5.2113054178024	5.18924962125328	5.05434204078529	5.00894935542998	5.23563055066624	5.57981216343185	5.162562740477	5.04908581212207	5.12697365775051	5.15442746992054	5.18177008680802	4.93675903252876	5.08255738041186	5.05460001337739	4.99699252134294
23072210	6.44204931201685	6.4997121310612	6.36397225927978	6.77899631789546	6.58064054490824	7.01498713574395	7.03709879624653	6.69538205381053	5.91388070970651	6.24277676338256	6.2747934253493	6.915622431056	6.32327711995053	6.66182651912129	6.570635826893	6.6844219487365
23072211	5.59234052041394	5.79639674205833	5.78958926654644	5.900543299568	5.76411068400911	6.01590070397534	5.27458504876462	5.59014658132518	5.26235836839798	5.46318240448746	5.29670032754343	5.87895888933802	5.39417969445784	5.75469277169747	5.22895313743517	5.54714031029365
23072212	5.54565538733949	5.55805775109523	5.49173101547752	5.6511433774764	6.07926515365374	6.07681784048138	5.91889191736598	5.7934012095392	5.52829723816892	5.4351805217494	5.66015341365325	5.61228822163411	5.69242322060039	5.70038765761511	5.60096869952814	5.59658473221273
23072213	6.5868372945468	7.07467237130197	6.94524328729492	7.16924447313803	6.7432947038343	6.86210487422985	7.20569178305325	6.8493124376718	6.63427883020867	6.7116529510278	6.63078662411636	7.00446472934013	6.84181541593754	6.88385210298926	6.76943589604113	6.76233432956078
23072214	5.42444615843007	5.89173667800879	5.26156397833531	4.96313523808294	5.70795217359743	5.72818569677714	6.03348213376647	5.37213952234871	5.26333254056417	5.04379954169397	5.48427653218759	5.44790210501741	5.14370045863301	5.51963363570425	5.46887203098201	4.83104115357566
23072215	6.39428720505357	6.86515007654027	6.81069257915646	6.87442629643124	6.98464024308965	6.91769688657537	7.16810228300183	6.96521633742121	6.89600753740197	6.67685961799564	6.84241191167191	7.21635943605695	7.0172377564723	6.87697051066793	6.75912541489551	6.46718210063987
23072216	6.3482828772265	6.55491756739724	6.32827129359107	6.43761302367905	6.0103771871112	6.35587854238541	6.67396231967888	6.29951305312969	5.94674620189132	6.33503413276584	6.01924615541542	6.15502766512525	6.46093531120051	6.21926618191449	5.77268577677494	5.99193145500343
23072217	5.05225093507548	4.80296832109496	4.56728492082413	4.91878947321624	5.56939668538619	5.26250184363616	5.58467600276196	5.14560911934755	4.97290033334762	5.11462890400105	5.25072357820205	5.0917230706015	5.28109872433753	5.04615185292455	4.60510275605093	5.07496865891665
23072218	6.70036284222497	6.72351574469371	6.77919835613636	6.47537136567091	6.67254131368371	7.04119716377665	7.27028579570479	6.94019237841996	6.7082235992257	6.65376269363649	6.70551926178261	6.90925347968864	6.85258713412203	6.33953443808051	6.32595037704078	6.2214798752429
23072219	5.55070863061096	5.40400206930543	5.76012010993611	5.2335601742651	5.97571606927066	5.60323425474504	5.89837316367988	5.9930696473949	6.01205038162734	5.70890329694732	5.94141492556341	5.74555702290825	5.55300984182078	6.40015603343229	5.67440377676922	5.9382559453721
23072220	6.42605929399461	6.20956731570714	6.61779457062479	6.17886095893843	6.73448334350736	6.54067374225932	7.14230896063404	6.61644217456696	6.45133812618977	6.57282523133331	6.51945368941897	6.65818942217397	6.88190517686338	6.56372550699825	6.42123135792392	6.63229405792066
23072221	5.72428996451284	5.40662242480018	5.97073982550851	5.76537922294914	5.90644170657567	5.55453353182304	6.19995903211034	6.08413629301536	5.81861764684014	5.73369242066732	5.88524398607107	6.10607507618969	5.91292746800103	5.58271616171272	6.00680425959964	5.80784288165094
23072222	5.5316124466743	5.64459222843073	6.01805304070857	5.83173204912393	5.62115767308187	6.10766821941026	6.35041743606331	6.05861145563673	6.03192270607644	5.8256153198705	5.90260713464982	5.67953814744642	5.99318784683767	6.06135423585459	6.26154673459635	5.79099760970454
23072223	6.39530023478896	6.14670416224025	6.53047657063082	6.58643720100432	6.45957565276671	6.44574042243944	6.95747186079496	6.69765862083342	6.48149430056466	6.41390946511653	6.55229753931276	6.633163166609	6.46903998168404	6.39590793354478	6.7517893314203	6.63019765723437
23072224	6.76346763230962	6.74415116170248	6.84943947805879	6.3805505361445	6.68144958438851	6.70819028912616	7.02648652031785	6.63525917795435	6.83181994002117	6.75713580612142	6.51170407069995	6.61299259181178	6.50447578918443	6.39809321324527	6.43378453242291	6.22059295352774
23072225	4.8465172707348	4.94758840618297	4.91703262267436	5.43806843967552	5.10295687164967	5.10023583061822	5.03217590784436	4.97906731199117	4.90983354698325	5.37811746084883	5.27865828712078	5.06493604408349	5.17700057965576	5.09624955450659	5.05579791436787	5.00986599832864
23072226	5.96185593482613	5.7285128341058	5.90510423067709	5.58267461825873	6.54472249920867	6.4095094934388	6.55378726372892	5.99802203562548	5.54485532287165	5.93410753548947	5.77063347523043	6.15557042471947	6.28615622779497	5.91494845922456	5.90048788579231	5.37009117742587
23072227	5.35591170811128	5.82972295896425	5.48339141986264	5.52708610290864	5.52007165803923	5.83952607789572	5.90947190255848	5.76168777918806	5.71817325678559	5.5433450303605	5.5946879557582	5.58230050583171	5.81351149671193	5.3180277499691	5.65904892213135	5.43643202881992
23072228	5.62290363178381	6.11492389829106	6.08406317987187	6.15001846684896	5.71950662069711	6.37611798003762	5.95259801868277	5.45738121471441	5.90139843306368	6.16179941424775	6.12106000911033	6.02415840879056	5.71046522507444	6.35332596501382	5.93693530437729	5.88619073863558
23072229	5.34263290471091	4.64503960124569	4.58771855088479	4.80142994294405	4.68022533108134	4.90517723033339	5.48913216531508	4.5708674470137	4.4662602327447	4.95636572192286	5.152627519691	5.09193721727891	4.43081559127217	4.50359313338456	4.41120931424639	4.65634583057097
23072230	4.65516212975724	4.63488299691317	4.94931880731522	5.03128702735299	4.61968870809573	5.28251169839466	5.08376773874143	4.94624068677527	5.08504497295586	4.7936898507448	4.97555352023376	4.67326921827709	4.70347141335232	4.95408826717722	4.84497511258618	4.97130062333968
23072231	5.16030114334864	5.21634286675683	5.1555583011321	5.5711971549951	5.43044773455244	5.33309200831929	5.63077563599894	5.24134670711291	4.86100326352032	5.40005395173125	4.96816100378201	5.57230642797238	5.03881876341893	5.72160768234431	5.22720353650352	5.22805867982706
23072232	4.56201905530649	4.32459716178956	4.49235832645563	4.18250253265075	4.88433413472031	4.46337575376393	4.67618265505333	4.71402855926965	4.73800052401653	4.64329110523941	4.35286342085352	4.28961983701456	4.21489948934063	4.55415151413452	4.38160978988926	4.08857413039133
23072233	4.78566632885739	4.76844310334157	4.86599967515356	4.98841860504966	4.94930013677049	5.32676354636829	5.02504078017509	5.4314849886894	4.74199917064571	4.59875630945159	4.9362776106558	5.06315650915325	4.82119437375944	4.66986659170892	4.54828504103366	4.59532936370662
23072234	6.80882979292358	7.15059822231329	6.70537427977382	7.04978207346552	6.96082884139412	7.16872869006887	6.72403735932073	6.54873516613915	6.45244389109468	6.69372884343813	6.62001013125434	6.44872091392916	6.33831329667835	6.62528452000702	6.74231864936473	6.30784230335204
23072235	7.05691437403568	7.31078846299464	6.88514409969486	7.06021923831974	7.02159688126355	7.48312861921854	7.27119611767549	7.10362224418786	6.72066848593336	7.02351874085516	6.9352055244218	6.69630974747694	6.55705180033252	6.86677213039619	6.87236800321726	6.39074718456717
23072236	7.59108109928691	7.46884729660505	7.64025580489243	8.0478610438156	8.10338644148139	8.1738227161505	8.04515113435108	8.03752318254595	7.59272434971749	7.7625803592243	7.63539079852713	7.53592274229011	7.98623214176309	7.44589441287877	7.73489297152866	7.74325680775725
23072237	6.00887088897291	5.96197214596837	6.25774398377434	6.07514565255677	6.32595955489749	6.21912870282445	6.2124963484291	6.17772599789428	5.45471656198159	5.92054807421312	5.73767395970041	5.55804218599988	5.25244449494105	5.78497391645017	5.73768122241481	5.78201841861148
23072238	4.92785674451479	4.80196490732802	4.79369021331347	4.9036339241631	4.56664699158432	5.17744282611064	4.53268642065246	4.44513979623061	4.48498649561369	4.73271099379781	4.56451010788531	4.67397907897472	4.56441584289478	4.26487613574491	4.68985714374649	4.67287450756923
23072239	6.0241518666929	5.22881034719589	5.94578688547209	5.71633782075195	5.60586395768873	5.88856208147143	6.14234737487763	6.16563907710002	5.93452851784295	5.76098529309956	5.85066067897412	5.80040021424914	6.25397252542168	5.73412930149705	5.41549794921139	5.20544815443091
23072240	5.95308826674796	5.94682622453569	6.07542186960506	5.72507242650434	5.19062983995459	5.65300082468352	5.77738157453439	5.86182469485438	6.30173429106097	5.844620210373	5.76824726082315	5.41722224136865	5.97968970387772	5.85533895183931	6.30093869718827	5.97079112121322
23072241	6.43318905216266	6.48393603191887	6.53302487446856	6.69115243710109	6.72307502636894	6.81412530968851	6.93492826326405	6.91493157119414	6.46358807645841	6.03094097090085	6.65297601100003	6.79694920522093	6.76973241194566	6.49073628031338	6.67308714992339	6.22062799181145
23072242	6.42108468337241	6.40570143438541	6.27020283628982	6.44434545446461	6.44252713361957	6.48278981648261	6.86788617647343	6.19665980969184	6.32425368773742	6.29989554068636	6.46879008702087	6.56265142140918	6.68786569338491	6.34773068525606	6.84724239835955	6.00950524730815
23072243	6.96414630579139	7.00119064170257	7.26756275484117	6.77715956972953	6.78373456041105	6.75820098286283	7.30060366259479	7.1929939903326	7.02104046472834	6.92402581319646	7.19637200599561	6.84358261840119	7.22482679213468	7.10887300970642	7.15406804693075	6.8282313040464
23072244	6.35894787111981	6.14193454745705	6.6104668936274	6.48804401545707	6.77476421478325	6.61766784319076	7.2242275909838	6.54160875325667	6.38677171891581	6.43703743657302	6.37708726181098	6.92785337908126	6.8783157567199	6.32728639497663	6.54576773645035	6.62286115598071
23072245	8.34592460099329	8.27767945989428	8.55133681409595	8.22907920618619	8.60355802247562	8.3322708461727	8.92442023909871	8.62416196048926	8.29615631506206	8.47173604038574	8.51446249904506	8.61895891626968	8.62662414703484	8.40387513721162	8.58507136635758	8.10563608721142
23072246	7.96172300399432	7.94916959609077	8.09024771285432	7.86152610310925	8.1121060470108	7.95226568541263	8.50255868602017	8.24693772437252	8.18855254906137	7.86943412993476	8.03379389505134	8.08293967673176	8.15749551316563	7.81731898093412	8.10121946082349	7.76047837177884
23072247	6.37815614936541	6.60186704978598	6.684615339037	6.62117660988315	6.62747854554009	6.72227510295577	7.05748414981841	6.96706766335361	6.56216697509064	6.61544125122721	6.61889696772091	6.53017496333703	6.54180491575162	6.30635183093244	6.50588191747709	6.25910357791523
23072248	5.29262592342832	4.71276314031428	4.96358156771927	5.10397255974335	5.15901559359137	5.11870092929057	5.16039964436079	5.43406461201777	4.64000252974748	4.85564569071193	4.95598907639643	4.68613921050318	4.77922345124427	4.48565339551746	4.97544854571026	4.90304530449325
23072249	5.62388663924998	6.31159125449191	6.13488203577041	6.0077329281183	6.21051558201301	6.60095412127303	6.72509447827388	6.48131504785261	6.08846811297752	6.59771892680805	6.18073210469851	6.33240411488278	5.92173603764804	6.09246865882209	6.28391869086883	6.11932323593763
23072250	7.2841058482045	7.44282571498223	7.49168100482414	7.56028210756468	7.25527470185262	7.233573351099	7.70044253793019	7.26779873341206	7.2135557471627	7.11862698024685	7.18044450117578	7.55120151392243	6.98551390579182	7.25514261309722	7.17939750065632	7.25115633694096
23072251	4.57359093073528	4.81563390538529	4.59617539140327	5.0626981529888	5.028554779324	5.18205234117194	4.70354054111037	4.69080322821487	4.94269632841873	4.89900555808758	4.86990417579566	5.12513111538726	5.25907190660639	4.54565644630085	4.8862666247217	4.81348239120779
23072252	7.58981229457026	7.59254295465576	7.5039100734362	7.53244730898889	7.45251257583239	7.52899808870614	7.90161054079634	7.55531637628035	7.46840902889983	7.08971814166122	7.16313266016266	7.5145646960342	7.46827263286455	7.16893067245352	7.49426941790619	7.04795061988387
23072253	6.45768116247376	6.45909320105058	6.86251524731319	6.6140413994318	6.67216601778418	6.86600457568786	6.75295321518162	6.56099160135362	6.36570912977361	6.59945114708848	6.45898850764296	6.74612362117297	6.69095860562355	6.71629999081709	6.72740989659239	6.11174245964621
23072254	6.47794863285195	6.83325373421541	7.03696771225522	6.79510406667248	7.07907647248153	6.88413574262933	7.52148650444708	6.94445361673909	6.91247088135977	7.0796647551686	7.01228854507046	6.54529307092832	6.93993582014977	7.12133676382824	7.1084432174296	7.07019864909204
23072255	4.68014805666489	4.76365513940394	4.85258797090485	4.79250410052835	4.87006955599916	5.40855734949572	5.13854613456679	5.11945478305839	4.81625973939088	4.91924568862845	4.72221065225018	5.12770874206844	5.0953973144134	4.98616771075426	4.63868320146507	5.137912186721
23072256	6.41668061345872	6.45989747894379	6.31788058253477	6.25977476091062	6.55203288798939	6.5536260119922	6.75007567266598	6.52716417345043	6.30989709005451	6.20806074351227	6.39362037832682	6.36873477162093	6.46980179785809	6.44252791947826	6.45570854266876	6.02850211851346
23072257	5.19043693843085	5.17852474788153	5.11976886241608	5.32171127235661	5.42566544327666	5.4805372992945	5.12542019051897	5.42356316447144	5.16592388482757	5.50571159737352	5.00080603728691	5.27232561673644	4.96684310305874	5.21506843320782	4.84053740706018	4.88294863860006
23072258	5.6459598284799	5.87847532650067	5.3770988279643	5.72762673596177	6.10960364493443	6.04635360734081	5.97677588739496	5.7283933507185	5.29843918010922	5.85412140015767	5.54432973217919	5.92390101690027	5.50227859632634	5.8882806843408	5.80642493333009	5.77636651796908
23072259	6.68383746130074	5.91044494242389	6.42579292464875	6.29579394450488	6.36219834479533	6.39647335695404	6.62373453458085	6.39110127639929	6.50586115162172	5.77999489034478	6.14507844792441	6.3229334885494	6.0703665385333	6.02512336731378	6.46713045602045	6.08704013944672
23072260	4.84319938106596	4.89268825442801	4.83499743454425	4.99390343353185	5.0603432943374	5.11096008831675	4.76726057914532	5.3629872362357	4.90220391301395	4.70960162206357	4.82183435544984	4.8722688995084	4.80340990080759	4.94167946390904	4.75586023535584	5.0932487194736
23072261	5.91523499566939	5.5855156182386	6.06772875702938	5.7367799447197	5.68042056323883	5.89455825938287	6.27538163012398	6.12991039821231	5.88096418661738	5.88197730444003	5.84314438357308	5.88503867000469	6.1202993883159	5.64202417130597	5.44872280274298	5.31839134412034
23072262	5.55070863061096	5.40400206930543	5.76012010993611	5.2335601742651	5.97571606927066	5.60323425474504	5.89837316367988	5.9930696473949	6.01205038162734	5.70890329694732	5.94141492556341	5.74555702290825	5.55300984182078	6.40015603343229	5.67440377676922	5.9382559453721
23072263	5.93094114166024	5.9099301887282	6.34862051739049	6.22589700157673	6.57497930832867	6.41343820030647	6.86892606328338	6.20785545290388	6.29346480972089	6.33261040962841	6.36650105413496	6.16401311599354	6.37382377506062	6.18836586003367	6.35391139050697	6.24795370093843
23072264	6.1774356531596	5.99815694055321	6.58983189465204	6.43166520873381	6.59661433828954	6.18024578987998	6.82041357573674	6.78560873924015	6.28764046323081	6.33510143145631	6.43819771013817	6.85352486343866	6.52857108393362	6.18455430708898	6.60911384431562	6.43319182548178
23072265	6.01655576105113	6.03730983457014	6.61075351462395	6.27622832536119	6.49391276665893	6.36315147104987	6.66661237103132	6.63926384116565	6.92421400600736	6.2890813329274	6.37754477072432	6.34175012182181	6.51440478591294	6.19189038143159	6.90572366432789	6.51798876214759
23072266	6.65345301053685	6.54741724932979	6.51274615140699	6.13808680698317	6.51374352405356	6.44387423779081	6.65657814679694	6.27613371605771	6.61605830586681	6.47211684095439	6.15156214652983	6.34043812220382	6.59558191176084	6.32228287291357	6.4789233234193	6.07166757391337
23072267	4.88157411538699	4.69227861613067	4.50094152376614	4.65414206632822	4.71104527368595	4.33893572455779	4.40159947888739	4.96414219065728	4.98609219744027	4.46717031507969	4.65842421719397	4.88530006777284	4.39715320706284	4.88476016929772	4.75204542945589	4.7250370635615
23072268	5.86158371294728	5.62942253711471	5.42440934124986	5.44853969998155	5.78781255724378	5.61752974261166	5.64390428273018	5.57203545916982	5.29485927784073	5.36177204872964	5.14566492937165	5.39488127966634	5.30357956475835	5.74203965538572	5.64703862497704	5.74247273637668
23072269	4.39396262228273	4.47742207837363	4.2269391916796	4.7958149011738	4.68551502470103	4.35896292500222	4.34999135349628	4.77134864399239	4.20054840262288	4.66459816101471	4.15154254541204	5.21797277553771	4.16965230462084	4.29769828786	5.13245657457406	4.09872049487047
23072270	8.33977880498134	8.60668334369366	8.56801108699407	8.60261490233222	9.03722116422616	9.30383143457071	9.50982902697563	9.08546801999173	8.03401902659831	8.54808209680147	8.32900574237068	9.04222863573598	8.67773993090283	8.38000950171352	8.21913605613538	8.72180939437489
23072271	5.94856791798758	6.4804536467503	6.17825758008572	6.2909014385977	6.39936299554463	6.26812769364899	6.54473496736669	6.38224721364041	6.27231084066515	6.22316988630093	6.1451825835786	6.07629716042818	6.23848655915186	6.36115006147803	6.26881115505905	5.94304929984695
23072272	6.02597365524763	5.41714863794084	6.06355705046246	5.73850271178344	5.94552002736663	6.08041131892893	6.50467151724252	6.31142705533646	6.13268431403441	5.97926733971992	5.98633669297665	6.16569169791072	6.12745287546437	5.66741708217609	5.99988071184939	5.49463261331304
23072273	6.50961391478734	7.01580520987589	6.91915751602251	7.01002196294996	7.03763171242041	7.04006761574565	7.54950529651219	6.98287118639105	7.11295870638979	6.80373878873772	7.11746477546537	7.48197668581176	7.31023545364564	6.84663186587321	7.42547420517558	6.58683154935426
23072274	6.42714010626629	6.22272269437867	6.64577122348483	6.3326879996591	6.66696608450883	6.82486009058722	6.81226259410123	6.88312114282642	6.25578502092817	6.52149155434077	6.66439375725571	6.83677441329677	6.74857491812191	6.47937611408321	6.23945044151631	6.25541199012709
23072275	6.2803626328927	6.17438317787436	6.51715143336756	6.17185370162497	6.68541818814236	6.48557099993798	7.05497124141054	6.50461248437738	6.32039212242154	6.41299898141289	6.1428856219321	6.10994224883906	6.73931674343945	6.47875905187396	6.52078751062522	6.38704845097696
23072276	4.84099840861593	4.66521926816903	5.08508335683427	4.98961092093614	5.0263989634469	4.97798145898277	5.50985960899447	5.07260343231362	5.10843530509238	4.99489219717147	5.23321657678708	5.32820650778101	5.11777498670841	5.3528364632326	4.93519096781011	4.92926431254184
23072277	5.45437403553461	5.36231407865394	5.63214290985997	5.05181315442579	5.47758716368303	5.30066105963217	5.92786178324257	5.41449134477237	5.49698377458254	5.36269903285922	5.45821093389567	5.31403990708932	5.38828453482398	4.96816136424009	5.47165088898001	5.29485601915866
23072278	5.86994465817901	5.85345056796979	5.93435525577716	6.10924022343645	6.31738557429425	6.03508566396123	6.45620753128845	6.21993045793577	6.38967737563143	5.7562840786756	6.04106900556718	6.20839994093832	6.15538540806584	5.55625320178033	6.12105867203131	5.80640388520493
23072279	7.4088950431891	7.55509087206757	7.7165990397314	6.98118593224668	7.3904967084452	7.4619516476605	7.90596976526662	7.75329628876285	7.49466884120149	7.34483052079501	7.63020356893248	7.42121655046225	7.54893746760085	7.47611583313971	7.53035703371763	7.27049132752018
23072280	7.62023567352318	7.44928498312613	7.82918367668926	7.57507947187601	7.35332719994117	7.27850167770772	7.74234063578104	7.54319234554683	7.6696975486715	7.62991299220746	7.68685672340198	7.9472307608083	7.71926146239991	7.51755296025708	7.50839988235273	7.58442184777924
23072281	6.49516703664516	6.47126628928026	6.59055088671209	6.14323356006521	6.24097296214751	6.18706438561642	6.45851641857181	6.69745982671655	6.49181202043777	6.40395846886287	6.30071208977318	6.27699311811131	6.53115446071072	6.4736926898805	6.42565911226759	5.84336580934616
23072282	4.73215356798214	4.85200177422994	4.92950308593969	4.1870276503671	4.94426311782505	4.92979633482529	5.39623825482631	4.99197595917732	4.35447764386854	4.95197532397933	4.95508323314047	4.5980468501164	4.67620335141771	5.0151793291427	4.58019563452526	4.66521850770409
23072283	4.63162312386207	4.54362697729785	4.6291218475355	4.32397161405902	4.41062803966745	4.68094251228813	4.78521711947795	4.79715423082543	4.46831944502622	4.38108583900852	4.71569370590101	4.62663185051936	4.41153936225917	4.2774026603222	4.60834618738128	4.6599441352799
23072284	4.63315538440659	4.91820232223222	4.42465199044548	4.64875072135181	4.76303206030962	5.23722590753909	5.20261241261128	5.40723390181864	5.14850289713456	5.43801600918229	4.8845840158797	4.84737113507882	4.64329175504681	4.51778902254625	4.92031421791989	4.72329929056922
23072285	5.97514678697194	5.99017228417696	6.15879496957211	6.07131257091318	5.65782402029354	5.68457732786597	6.37710906104446	6.09323576934799	6.00362111456499	5.92010193290767	5.87091462429331	6.52546820211239	5.99645651436463	5.96353977848769	6.07147279740688	5.75849638848004
23072286	5.69294227207045	5.79760139384064	5.66596025895689	5.94683352007537	6.13071692406586	6.15804253425022	5.7239626015315	5.58592439419029	5.83752321406132	6.02381986714645	6.02447362879129	5.873476108125	5.75349668412197	5.63409980195281	5.36804192418756	5.69993954573489
23072287	6.10909223720788	6.49581076978818	6.35952361020934	6.30335463758129	6.01272689136746	6.38784176923047	6.62640846148209	6.47648103516493	6.37400208839965	6.59989880411698	6.14740084521964	6.58789718321619	6.40502156787214	6.15186883542086	6.43632974105614	6.01354556957232
23072288	4.97047979843294	5.46410619155053	5.39610669298874	5.32187888634955	5.59449500243682	5.16065340447225	5.20861388807568	5.21556773520906	5.27741518568912	5.34608487986342	5.2946867522305	5.4857750606449	4.97153909680788	5.42890946231284	5.30181395056982	5.05860422611588
23072289	6.00999228694154	6.5005103355914	6.6038594964386	6.27655245206147	6.61750509067109	6.22866944115618	7.02710397961516	6.74388404994697	6.22446304398495	6.55562841179773	6.8370103337267	6.33702030897505	6.47386848147485	6.08683587201472	6.73967367192411	6.29938650253737
23072290	5.71037553742072	6.05585577677198	6.33071367879325	6.45195732128644	6.04963153155918	6.52419490862479	7.03719900350305	6.4419871170938	6.00811790342905	6.13498207830549	6.17001522792459	6.77460762187576	6.19070677756539	6.6301227836617	6.00143444790207	6.3498769780411
23072291	6.18009026705746	6.44756535208739	6.27075019117758	6.45403381288736	6.69915641776099	6.473322524249	6.81977690021984	6.69573732464106	6.15385958781273	6.10639687416308	6.38796010967879	6.8662391931375	6.60420348989867	6.2691298648788	6.82828115336628	6.05529426586029
23072292	6.2525820395724	6.5810447027306	6.08006703910581	6.23474458532593	6.74246371104868	6.34674865200907	6.64909654942088	6.42708792022182	5.92248729896451	6.29474698334274	6.17974844734858	6.32465770873959	6.14131225017223	6.276139734001	5.95663381818949	5.97037142767452
23072293	3.96428736247561	4.17894386932974	3.45021617185806	3.92229684838674	4.72727116543807	3.81094535083316	4.05954749604904	4.12186366049208	3.77816742513417	4.17894681984277	3.83365618473741	4.3649570252418	3.99757426223723	4.23160822090986	3.89825669600407	3.92212813500465
23072294	5.20050469151319	5.26521494558118	5.35459010458467	5.137704667244	5.0522214416183	5.00954343021365	5.37064147193236	5.31382603709367	4.55812277314419	5.12206498181211	5.10414078323788	4.58956497773171	5.28924734771883	5.07492710356734	5.08921515305739	5.09630866610528
23072295	4.28932011993298	4.04373046838571	4.14794036209638	4.29845556982614	4.34938659673307	4.47829443087493	4.48341797235168	4.40404053715383	4.23768948797083	4.2852467203965	4.21847112816961	4.20397446774515	4.2270581980047	4.08452754097707	4.22190034387993	4.6421993398943
23072296	5.91523499566939	5.5855156182386	6.06772875702938	5.7367799447197	5.68042056323883	5.89455825938287	6.27538163012398	6.12991039821231	5.88096418661738	5.88197730444003	5.84314438357308	5.88503867000469	6.1202993883159	5.64202417130597	5.44872280274298	5.31839134412034
23072297	5.55070863061096	5.40400206930543	5.76012010993611	5.2335601742651	5.97571606927066	5.60323425474504	5.89837316367988	5.9930696473949	6.01205038162734	5.70890329694732	5.94141492556341	5.74555702290825	5.55300984182078	6.40015603343229	5.67440377676922	5.9382559453721
23072298	6.13646779043199	6.30493572241786	6.03709986753595	5.99395520151288	6.08595707681287	5.93749698311518	6.55750341122347	6.45497239193372	5.95154100888331	6.11361794724153	6.38599823406604	6.53416204872926	6.65415857335721	6.68947212397215	6.01034302574622	6.42387039641844
23072299	6.02775090521874	5.85288963006928	6.46117155877751	6.24033173054076	6.33599754593024	5.94394648127983	6.62794982397312	6.70625122836636	6.19705196248254	6.18576225518768	6.33146992804911	6.65215667699979	6.33698595542293	6.14168958844735	6.41697490845729	6.25947923378721
23072300	5.35741430139687	5.5301240551443	5.77444075438219	5.68368928860026	5.84640187352838	5.66304233498848	6.04739762292962	5.87645628886994	5.86338054027946	5.6142886794091	5.7240436809503	6.00405181379421	6.21088806550733	5.8375304847184	6.270945981701	6.02502209163138
23072301	6.47368690199893	6.38166407047947	6.70620276352548	6.59918448277224	6.40439881273726	6.44247617623992	6.90877602934252	6.48610326611877	6.59587852727912	6.39311137720704	6.48321121524587	6.64610539547612	6.65602627480159	6.35867127150015	6.5928931251208	6.32385638419845
23072302	6.74571443455283	6.74685852892744	6.82754222816192	6.2981116320352	6.88627541243989	6.65642031334849	6.91341935344232	6.61793752294399	6.70513757571254	6.62062761609171	6.49358542221299	6.62331506128327	6.77887167243453	6.39600215763624	6.5459758108307	6.32587531436798
23072303	4.92517468321447	5.0452639077894	5.14922491760542	5.18461044117005	4.99908571462948	5.42380549555197	5.02116085213889	5.15507679721112	5.15039229183726	4.97689355720951	4.92641738777734	5.05192584798697	5.18002665610949	4.91097740431815	4.84518599311573	4.84071321030379
23072304	5.86596568619412	5.90360871198335	6.01430990279386	5.9380681039078	6.30318750852403	6.36333262321336	6.45706878787882	6.12343116772546	5.86945326676347	6.03564523583653	5.85809413234172	6.11767163682047	6.00587014005549	5.01847156016132	5.98593748221653	5.83920591350045
23072305	7.00506780689912	7.20186266176013	6.85026979220559	6.95256425774864	7.33227954794338	7.28537252964863	7.07380184540118	7.25836730497218	6.8749035963545	6.8454927927051	6.44375806975438	6.80194625164482	6.75835629763585	6.72145116633298	6.5289007744026	6.77223714740273
23072306	3.9282561582447	4.17651484447167	3.96890940470169	4.01642431923969	4.10981931776225	4.28423217493445	4.3422240260847	3.81694140039911	3.98016773604107	4.17023763994931	4.05307208618681	3.90643660586218	4.10758232100671	4.1047425901583	4.05423133303335	4.18594687837582
23072307	6.42557142881313	6.45037500691112	6.53532420804669	6.44599415905909	6.85768823052276	6.74788321053786	6.70318226806635	6.85009010892396	6.67736696689373	6.68868680069353	6.57958203973984	6.51169063431009	6.38177334268701	6.63753157798394	6.38160288022646	6.38910293137053
23072308	6.46678626208866	6.44154048980211	6.60780710144588	6.70174930531086	6.0037921234982	6.43571771536784	7.43874599049953	6.46140065498973	6.16838906862856	6.58208325175226	6.07970080402796	6.67379946414846	6.36236500405378	6.6548172337565	6.40861735288965	6.56853804611845
23072309	6.60364409357966	6.44254974857946	6.44760837297018	6.29563048627557	6.59135640747985	6.62957791741684	6.47351946264948	6.59942953105521	6.32493179010721	6.23382664737138	6.49697384830639	6.66578803875158	7.02372124340065	6.5632776875971	6.18376252144731	6.54002879563494
23072310	5.18528876339251	5.79178460440948	5.55388217180793	5.33089720825448	5.05728516833943	5.41349400278873	5.34333951757667	5.49852827078841	5.31902466329011	5.1557472551005	5.24265884069031	5.43017741970206	5.29045151885453	5.38582178038342	5.4968916978457	5.431224751762
23072311	5.20554470394235	4.94024510801734	4.59361865647466	4.59987210380651	4.67133013309899	4.23628788581523	5.00019748796223	4.76403740610815	4.53930270982285	4.45451386658315	4.33266981670537	4.91658379362252	4.78015717754177	4.79375538490143	4.6966386461598	4.25721711979454
23072312	5.63920680974769	5.78979841516816	5.46006868339124	5.81838006323452	5.75008657545527	6.00610982945659	5.83949692554139	5.74674817197699	5.59811682578164	5.58964425728083	5.5426921437589	5.85485911208828	5.41232381875093	5.5920235459977	5.61755308414141	5.67968023991054
23072313	4.65994022581382	4.49166782694516	4.66116192193588	4.44380408813665	4.39908455451512	5.30077840922382	4.73535362103169	4.45694281136245	4.48891508771403	4.58982738311287	4.09254136042524	4.14658991474347	4.4615470391021	4.31621032486109	4.63831847512149	4.03323283975891
23072314	5.36934611789343	4.82568709209213	4.6101459239602	4.77648550109427	4.67910264237996	5.56196462532246	5.35947402121798	4.71565092095137	5.06505045141319	5.04648708227304	4.74274147661856	5.18077890587353	5.26055643999353	4.99124471546992	5.51262662815876	4.72450687456799
23072315	4.73910214080245	5.00798915847014	4.72568844368315	4.89511904931022	4.92140008677473	5.35723836922937	5.10210714690211	4.95322504768268	4.57208382744503	5.01925734711367	4.53671724176353	4.71069822103849	4.69381580877229	4.63175053423592	4.72839648817766	4.53487336669327
23072316	6.30370549560418	6.31713016026122	5.94725751646821	6.31847731701216	6.61547339559442	6.33885369494868	6.71479383967598	6.35111637146088	6.59148570769125	6.1139266297609	6.36458190757208	6.54598538685765	6.75294269090873	6.34142107218829	6.39301354581371	5.92143970881388
23072317	5.95308826674796	5.94682622453569	6.07542186960506	5.72507242650434	5.19062983995459	5.65300082468352	5.77738157453439	5.86182469485438	6.30173429106097	5.844620210373	5.76824726082315	5.41722224136865	5.97968970387772	5.85533895183931	6.30093869718827	5.97079112121322
23072318	6.63908822315693	6.94662161684576	6.83907609047088	6.95379312923036	6.95853726834765	6.99073036676644	7.33938864276494	6.71074272932324	6.93328137300555	6.80979187541843	6.8875451202375	7.29827839977984	7.02445862962219	6.69841942154066	7.31116100069882	6.45415010504324
23072319	7.4714384117196	7.51906501675763	7.86403933126735	7.38865043124025	7.32479482065697	7.28426457406314	7.55276623928635	7.55889357178494	7.707489893729	7.7304391091463	7.74598878237955	7.53922143422833	7.7547438178177	7.68152292786509	7.65655863243532	7.38847109223935
23072320	5.97923947963909	5.92228759169812	6.23882702327416	6.20021869739769	6.47270977179621	6.29150945216291	6.82487675263766	6.24425970295929	6.11233268474056	6.37149051378881	6.25778877142492	6.13835891292002	6.50570696573039	6.46521337108235	6.28854383951477	6.26595403013184
23072321	4.81712220174046	4.98159586946207	5.28055616027971	5.1887035882438	4.99691649450728	4.93385271684417	5.3571103791701	4.9359874163399	4.99795867589448	4.88790680319168	5.23670550808632	5.4478864706963	5.19504011322684	5.19834039340867	5.2003977740605	4.97654146311067
23072322	5.75899341946814	5.50770397895154	6.12789120665092	5.9418210234615	5.89020656813536	5.66893358854947	6.21732811246004	5.92572193312868	5.90873510887358	5.71940411583516	5.95431951928871	6.40479971663372	5.9378624892704	5.97007142050252	6.04680729783883	5.67455424748311
23072323	5.77767342002402	5.22830851843046	5.53262110043607	5.28600766155036	5.54277341212706	5.76862888649902	6.03623046059602	5.94952024998811	5.66553110843914	5.46614725635034	5.57301568477322	5.55505995269472	5.984669994869	5.17670803031894	5.19776369699886	5.0696244227578
23072324	6.94017776103138	7.02862882248733	7.18556271760924	6.77814498936598	7.04100000964212	6.97824751974434	7.31256205986544	7.4293627236157	7.21669343738807	6.89595260040191	7.03818786332258	7.19954080730959	7.11019547879619	6.79361468397618	7.09600311390537	6.83211609160544
23072325	6.1812680803269	6.25550678485936	6.37721060522911	6.31647884183792	6.43095976136123	6.39476875548194	6.70675032947911	6.69999591846382	6.16354344886966	6.23237744294602	6.32648958458294	6.08561099554942	6.22117802566047	5.973636290815	6.17904160689845	5.93916222058251
23072326	7.04657906375455	7.47075278934777	7.61123183131648	7.5748331050857	7.68094260961843	7.66355648621443	8.04182867765296	7.73546303685653	7.58594099581333	7.48657872670746	7.18725097348011	7.89208549814399	7.87624808746901	7.39734708608969	6.92179108131273	7.28556664348648
23072327	5.84409561868197	5.88785309631249	6.04207119578066	6.34144263060424	6.16526681987887	6.01877164229777	5.71850829419143	6.12936478696835	5.81614963089208	5.60444272582867	5.8526640892538	6.24550512169179	6.13367000443553	6.09760330677443	6.01747510765966	5.88814084719207
23072328	6.23906000995474	6.47051832232903	6.50645250337629	6.72802581988542	6.66465114963104	6.63181521599535	6.39603043341424	6.5535681651305	6.60966935441172	6.4076036232578	5.95758123392369	6.48105428731153	6.56601857771181	6.74207344439526	6.64235979335948	6.45574584824317
23072329	6.18271731785568	5.88187514046137	6.00509041468672	5.95253671739387	6.0771128784257	5.94302935456497	6.26951032738933	6.07479823534009	6.33778056489022	6.26863448291477	6.47453499820413	6.08903466196431	6.69535838252669	6.31169710868624	6.37066605905265	6.00521827194399
23072330	5.93314439938809	4.97591154426913	5.62466298697226	5.68506438392748	5.8349086861842	5.78886789995296	6.15990760077684	5.47731992902801	5.85469699267766	5.62311752366333	5.8911938893007	5.85874156781544	6.04853048527102	6.44715278412783	5.69405783146434	5.5941778562846
23072331	4.88156173128139	4.36835736429086	4.94254781406869	4.91601170021928	5.07372617908234	4.83525985023211	4.88613247853945	4.91892230799496	4.76688563491242	5.17203584947622	4.90459365903464	5.25604873801825	5.16884883917456	5.13051605061001	5.12403611302993	4.65109714722751
23072332	6.66923954343675	6.52548688973786	6.98188212089914	6.93955899535087	6.90392518048901	6.50939219675301	6.87367282343014	7.13732280611475	6.75886652708662	6.45075136120149	6.83019356499498	7.09065027279996	6.78458688976407	6.58617770816549	6.89162561014529	6.63299170076429
23072333	6.0923744096208	6.13656824524648	6.49852071361458	6.24151755087858	5.9424435010781	6.09623710286601	6.88509787314384	6.1773357319802	6.0893739834396	6.22910944321014	6.38684328739531	6.01446234179482	6.43689517872513	6.25053320597636	6.41992942206562	6.26284931385311
23072334	5.74195465485633	5.98271255430756	5.92151526245965	5.15305789428884	5.64474876346272	5.63993302321519	6.1117577815266	5.5898873256211	5.86574684194688	5.82904567760682	5.50035231804899	5.68645399902188	5.94341156354104	5.48878504588712	6.0440159327724	5.51929236934551
23072335	6.86786244181768	6.98881267127342	6.95759584499591	6.69691810321775	6.81802628177081	6.80764375165534	6.78108148326721	6.56474742576758	7.32750914437774	7.19498702921255	6.93906535660509	7.02667509138497	7.17860538992431	6.63338630798039	7.16035574748418	6.7026824304757
23072336	5.19621294123479	4.88187481433822	5.11113878020073	5.51195900022756	5.26178258245233	5.43554751036436	5.95716011901839	5.39011647496094	5.53966906161721	5.56022328480396	5.22631450809571	5.79708468683613	5.53748195707076	5.44441408751776	5.45338203628697	5.56651246244373
23072337	6.38780724102127	6.25269194714123	5.71488051838832	6.48536620643835	5.69721712717597	5.8108602072978	6.02620262034501	5.89693183534006	6.7146523475265	6.34630751830845	6.49501478124845	6.47388056114335	6.90329598550488	6.6563664585147	6.87987759975156	6.49270674549796
23072338	6.17616074614809	6.02152346879748	5.56769108117234	5.99148270755705	5.74908060924456	6.38543044324028	6.19728438562037	5.48076700800356	6.584308226793	6.17876440993399	5.84614526165202	5.66622271777632	6.35296367309192	6.17360800140223	6.38151173426401	6.14313514244212
23072339	6.35684558399854	6.11839097821192	6.14025703452796	6.19219750762542	6.35719522645605	6.34746091469413	6.88430057754484	6.36087180759523	6.39860770885041	6.33274898036141	6.90741842161932	6.58000720063868	6.97875590562282	6.60625108707229	6.59309720935719	6.35607549970166
23072340	8.80852791460561	8.82292840381973	9.25283121450313	8.97126838470821	8.91159670902498	9.00210869528111	9.30700523887899	8.89411340413953	8.77656914615621	9.06979488271432	9.11760079267763	9.04964344664434	9.1666459523367	8.95623086858366	8.86339187180689	8.78388054775154
23072341	6.521301645725	6.51982906686792	6.77483322982311	6.40995281845189	6.17998169962699	6.29645262877067	6.84613627697131	6.47082949729912	6.80953152740243	6.58912629472287	6.60792686744939	6.46535060461869	6.55708277633492	6.23203163368086	6.54914209355478	6.26568898413163
23072342	6.21235005928266	6.64674124734159	6.64338772642093	6.77864661214012	6.70393749461014	6.74432536194269	7.12240737607949	6.73570114492413	6.62027324522328	6.49407394420485	6.56527240923435	7.21072632212925	6.7789423616813	6.26103205867022	6.58518971669522	6.28861483197451
23072343	6.05408628070445	6.1457127584733	6.19918623613738	5.95042748913662	5.95359449695234	6.01447658268767	6.26440043754942	5.91583257592902	6.00035660241588	6.16014250158954	5.93692124887944	5.70151013417801	6.17308902596367	5.8906449570978	6.25037395915729	5.84921254763122
23072344	5.8780948296322	5.94158490197967	5.70191805152214	5.08342612076188	5.91838919583477	5.74247982317203	5.9104430137426	5.95259786667556	5.65167874065518	5.81619147702181	5.62781798016598	5.80186563253472	5.9012821944737	5.59717426107644	5.8856571214708	5.80246630438033
23072345	4.27924116703569	4.3156771389026	4.53068132533358	4.03051798249133	4.4410773243249	4.44938552552449	4.89303226906297	4.62719332083801	4.4118799871743	4.0615095196037	4.39649774230942	4.48842255195727	4.30804137183559	3.91781670731416	4.36581651664897	4.76617747226284
23072346	5.33190547235786	5.50364540358849	5.76520473888937	5.68864591271727	5.65366705975054	5.80790450146656	6.06687672479025	6.25511765782238	5.69551469344222	5.6012646035536	5.96515037284098	5.7190306052385	5.98690224645704	5.36215027315585	5.4273384212141	5.67279034833284
23072347	6.74592073379732	6.73497661017213	6.72429105102197	6.91751086330239	6.82088096810983	7.01929221927829	7.37813646373968	6.98627374425203	6.30585807985843	6.49918541534808	6.62462730900802	7.10720283403659	6.69908629175831	6.68558919349751	6.84227677439253	6.71743900641003
23072348	5.66599414511729	5.59528462976333	5.60674401789981	5.23878173051895	5.73493857962569	5.66330462397181	5.68161533524659	5.4804493169793	5.43596841867555	5.56423242992349	5.68037553508988	5.7833642199477	5.2737803664491	5.63453110664176	5.66027251251197	5.24955705691102
23072349	5.47181391194766	5.42400192800694	5.68457111973417	5.98556736016909	6.04609863301572	6.41929291254746	6.11445768473432	5.94381721652201	5.82593948080152	5.87665983608213	5.82606432665673	6.73825526288138	5.96559650464773	6.14457185680368	6.07297142923322	6.07708020651319
23072350	6.4060074425707	6.73075942074658	6.89294783341122	6.91790806461242	6.82151661105381	6.66635268061044	7.22163307833129	6.94831688367881	6.69535020113802	6.70703218070983	6.44786462736687	6.89563562632698	6.77811218539229	6.69870865281892	6.62312220947942	6.60376717419302
23072351	5.879522247147	6.40162261069229	6.22844242627258	6.37993029530963	6.38546771527908	6.42913784296549	6.88450814070988	6.48121448895872	6.36770513619287	6.17085371875616	6.34010196458253	6.9303076648817	6.79722238508354	6.28056011792094	6.81016078687609	6.08119338250762
23072352	6.03812951619954	6.22627080207742	6.01903632196735	6.10475525402186	6.4804187835972	6.62500016607764	6.60188864583952	6.5086336519929	5.93837081060102	6.16818421969037	6.33411904546214	6.02798590842486	6.38298924601104	6.15360523428896	6.05006566807254	6.34278658082177
23072353	5.95330362498909	6.06519289679056	6.01692821850217	6.16942061722627	6.26378202543423	6.34682125904797	5.78644831020662	5.96815800179928	5.59487871785607	6.06647628351479	5.9962017483226	6.1409548610386	5.91940855749495	5.96994762942007	5.82644009249929	5.75583230703324
23072354	5.21185105139205	5.03741699464546	5.35681395896526	5.23969771561307	5.54355947582688	5.60319797636954	6.2979414201017	5.80363512973	5.72222971072599	5.2722805172533	5.41107704096357	5.9149759685143	5.04018101409131	5.84905955033508	5.4249490861274	5.37876855009346
23072355	4.76951302091385	4.64274462871738	4.18006110925898	4.40610659353689	4.77266480953191	4.74491129809976	4.39453821609538	4.4682139240561	4.47794672490263	4.1151292430014	4.27224671640317	3.99365927112724	4.12159077218512	4.59374159350704	4.14247016631029	4.37420416858117
23072356	6.14795609626913	6.18439125579206	6.29084122736665	6.48028911804526	6.58486594883882	6.68263032273161	6.19247082710648	6.19103743762622	5.87459431798025	6.15095853322982	6.03006818735699	6.28252470316409	6.1838339421293	6.15734611360799	5.88997166244739	6.16149121886527
23072357	5.86046673002324	5.66612957083411	5.98675694231526	5.69724245759411	5.68616493260786	6.0514008738776	6.28676144121361	6.20372309867057	5.99395718176098	5.86907378200986	5.86144524214618	5.815928884442	6.00163432868007	5.45201850074941	5.6177839538297	5.44093186318484
23072358	5.55070863061096	5.40400206930543	5.76012010993611	5.2335601742651	5.97571606927066	5.60323425474504	5.89837316367988	5.9930696473949	6.01205038162734	5.70890329694732	5.94141492556341	5.74555702290825	5.55300984182078	6.40015603343229	5.67440377676922	5.9382559453721
23072359	5.72821669401099	5.62145495064477	6.04961896241802	5.93854089030143	6.25124759391576	5.77819515821734	6.46395234108496	6.09798946001066	5.85258359202522	5.79505577128266	6.15423160073792	6.07924566818702	5.88111831562544	6.13684752707527	5.85600482264209	6.11122593815083
23072360	5.60113215682386	5.24872773970841	5.9724711793493	5.78769122264299	6.04087749605055	5.57519824774147	6.28006335768915	6.19594158270566	5.61418249262761	5.65986366081713	5.79428548982946	5.9929135408605	5.82537217820871	5.55252962714763	5.88747490288708	5.78291999588884
23072361	6.11840344715215	6.23383481171398	6.68659071839883	6.4565777062094	6.2663287655436	6.45305850767472	6.92504705878797	6.63053488745065	6.55237259817408	6.38806880964781	6.53223945366028	6.27546088544354	6.55962290295945	6.38271638309429	6.75876560714677	6.36013125419571
23072362	6.60110938178475	6.26086703024272	6.81107728389609	6.63113914548383	6.63963446848056	6.55191948885245	6.77321931098097	6.63444020524857	6.60736567074409	6.4954998902732	6.57572008945704	6.73074324360596	6.82299759979429	6.53169108513135	6.8708625939016	6.44288808108016
23072363	6.46268125741892	6.38301516300967	6.53942834477941	6.10300905557567	6.48472362954834	6.25235988654582	6.46672295957287	6.2771525065548	6.53561004362965	6.47412687450312	6.23054424952765	6.40916631154729	6.49704105603052	6.01981306314123	6.06147834838463	6.05523055962545
23072364	6.36833552919317	6.9903742054935	6.99937203033423	7.02493999900626	6.99878677374795	7.01700489676224	7.32389188869849	7.0678577084919	7.12720619514666	7.03300632135515	6.59613969588235	7.42677906515633	7.29953553579647	6.6447123392633	6.61332664674218	6.8342107872657
23072365	5.84409561868197	5.88785309631249	6.04207119578066	6.34144263060424	6.16526681987887	6.01877164229777	5.71850829419143	6.12936478696835	5.81614963089208	5.60444272582867	5.8526640892538	6.24550512169179	6.13367000443553	6.09760330677443	6.01747510765966	5.88814084719207
23072366	5.65842410043649	6.16810934433459	5.98232045972707	6.34423116129548	6.28871206296452	6.42249143151578	6.26162617926293	6.08540237508219	6.11772542697882	6.28938378840405	5.83637745996507	5.88802218815884	6.224660590961	6.28612140456101	6.15812706228542	5.78589381975806
23072367	6.00869417015463	6.16099229070639	6.23573868031032	6.25221656548163	6.17899434939887	5.83302164170649	6.2451743826813	6.23040971745517	6.11942746280873	6.24788151321166	6.35496675722761	6.02429571181501	6.75205018494925	6.67911993418878	6.49742767818126	5.9267631675835
23072368	6.38190741874648	6.55653611215549	6.33773020217046	6.16585235499772	6.32998248745619	6.41922424237251	6.83496816929575	6.4893004049477	6.23942036897696	6.366118888724	6.28539835099953	6.41412730075181	6.54381395961614	6.22406165565914	6.38986284719638	6.14111846877111
23072369	6.19385184932536	5.73324172928398	6.41225315236042	6.23072136639896	6.41232413264166	6.51430906145661	6.77616724342264	6.47364961280498	5.9787746204752	6.22089496897128	6.33416129542617	6.8165370645968	6.39982868888403	6.41019191019869	6.18232259141928	6.18016943966322
23072370	5.09834141519652	4.4760883629373	5.13238062226104	5.08049430116391	5.26198870771897	5.01515744238385	4.84003887045176	5.11182119235086	4.84136962043796	5.13921923033863	5.03601533051445	5.07589541667721	5.23119763613047	5.40624260759085	5.11034447220337	4.79935981921185
23072371	6.43028088828814	6.19515367442518	6.65617031989903	6.67855005442586	6.4447269152132	6.30601799290894	6.55683963713432	6.58428767038247	6.79922589656649	6.18723744231189	6.61993372019302	6.81483531850047	6.53231677660151	6.20460339490145	6.59843037926609	6.37208564774977
23072372	6.94146696398433	6.99750875260354	7.05870222120836	6.94390742975833	6.45907084346753	6.67279183368033	6.92558538190354	6.48878515447112	7.19294977907267	7.24564448265731	7.01299686003184	7.1442804374153	7.15583373718216	6.7998468663199	6.87835315790524	6.70453817765705
23072373	6.00153244574366	6.21990544548463	6.17798565206944	5.64951697241677	6.01562601060995	5.5087225359415	6.2099715601638	6.02917660088135	5.97305260486618	6.10313153880553	5.96636681765888	5.82395596628105	6.15596828208971	5.68016480321777	6.28757734634991	5.82789024146601
23072374	7.4563664690681	7.45816397093784	7.64240300888632	7.5018248231428	7.76425695765266	7.46842222038227	7.78407006720395	7.61248139750604	7.50033507493672	7.42152710770829	7.60452904751861	7.71983050675381	7.66123280632829	7.41266344352421	7.66087298012478	7.24017761310749
23072375	5.67433445421004	5.81328774237459	5.61562349082642	5.28231865511982	6.11827401623043	5.66440626503976	6.1274795844975	5.73041573933845	5.80000652073754	5.78529752095147	5.5384532929752	5.77310302036521	5.78352976929718	5.36314812117784	5.79534171427347	5.63478392161517
23072376	5.11789410612028	5.21946622131553	4.83081676606382	5.48330174072298	5.12457895915023	4.74292524887537	5.2178802025813	5.54735243712964	5.4505311470256	5.20889715636668	5.38183570136568	5.61081151126827	5.82908594375104	4.85696262852418	5.55718651552106	5.57826287054259
23072377	5.78403408030866	6.16937911309383	6.11730948038072	6.1950478110144	6.1829753634482	6.18122394850093	6.79647413198868	6.13992132720265	6.04367871055444	5.88761261705566	6.27529450641627	6.73126268905025	6.29740452684357	5.74837994681521	6.56945449060151	5.81459875965047
23072378	5.45034088035249	5.61825795451005	5.60395138327068	6.04964685344263	5.71999651670001	5.48431152787314	5.34041958467659	5.69256672866694	5.42160788992158	5.21677930102658	5.44009295060465	5.91638205511362	5.61469032713531	5.83533282316148	5.47949764401055	5.41441912520543
23072379	8.4660494328402	8.61446952927663	8.48925977618649	8.66049882412187	8.72182640830696	8.68788632356244	9.1230563369065	8.78314321932855	8.72953623704178	8.22389746329833	8.52559186708564	8.6446392580293	8.73949965950587	8.52330538055381	8.76221399470161	8.55006720213656
23072380	5.63054840910846	5.74534041646535	5.75494094912035	5.49684022804043	5.33611240707749	5.30222053088811	5.86829697212052	5.53131031955383	5.73517849545914	5.43785147478434	6.17116208939627	5.77193388064778	6.14845253772709	5.97936698312391	5.77720095113747	5.61110483978808
23072381	8.07116896924439	8.32980010405598	8.24903937739593	8.03847474440416	8.04117307029294	8.09143560347465	8.5832153635489	8.13120541553024	8.25998424397909	8.26700777801119	8.14793866409729	8.09966963925647	8.3187791382994	8.12044997084594	8.33493891351577	7.80677700917248
23072382	5.39809332974909	5.1692151217019	5.61831654069428	5.38274690949898	5.42006923901899	5.22783655224964	5.8941421385974	5.33196953170838	5.07234762938979	5.22148689669628	5.36770680848266	5.46054881623385	5.48974027921917	5.17821240120489	5.43193563463092	5.1745768523575
23072383	7.38618459340995	7.40815136280103	7.5576507782346	7.27469146812997	7.62415472411947	7.5331118780823	7.72874468245729	7.88414631098968	7.48525307524755	7.55026633746481	7.50240399682157	7.40129173431153	7.75272441525002	7.29811196504574	7.17444911071298	7.36722716067226
23072384	5.06934268309296	5.40583892410826	5.18882487584073	5.44658047819452	5.58641528612134	5.45737650864681	5.76757508168464	5.41097232232353	5.11544339933849	5.30879716861797	5.35683907543695	5.64676754063141	5.48903661996042	5.18262847965506	5.44549971848227	5.05815218385878
23072385	5.95586874387787	5.9251566802523	6.25011170012461	5.66793578091773	6.23503393161817	5.65117304693156	6.45306010065999	6.164959148692	6.06046531030555	5.93543572947087	6.09563779591403	6.35962164917344	5.97610558700354	5.93572803203349	5.81732517494861	5.78201894112531
23072386	6.54533427201508	6.61545733294035	6.18048962575659	6.4336173852055	5.8225503566829	6.37879383086807	6.62412060786837	6.55905508560425	6.37909565941406	6.49407428921054	6.50603862467404	6.61097228534232	6.84291004516198	6.72933393848222	6.71173919008307	6.49708682191679
23072387	7.11714546745221	7.15474898023798	7.08900248059068	7.04130000946718	7.4938659387237	7.4162804509315	7.71752758799953	7.6948262440406	7.32840990934816	7.25610483545669	7.22164356032614	7.37221307672848	7.61482675870191	7.03765517484521	6.91477210469639	7.00155621060564
23072388	5.14759540823327	5.40638231709878	5.23951311550008	5.53017360429611	5.43214247319205	5.46090233887776	5.63032865884169	5.39448326751584	5.20954877845313	5.29318652337828	5.33816129674086	5.53771409385983	5.48958001295093	5.1160730495753	5.45007669512338	5.11874391758841
23072389	5.53041509070605	5.46678259308959	5.80252631650401	5.5077598339556	5.58164523298416	5.4706295300573	6.22010493443306	5.90148695705917	5.70230477002653	5.66537315043223	5.71068752478213	5.87431257762052	5.76744397070866	5.20744851226927	5.60405391628306	5.58064508456241
23072390	4.53618326007872	4.3443774774795	5.0292690538312	4.78526860399834	5.13636092926809	4.84601351894215	4.94322630792072	4.65324005340357	4.66052884973713	5.12488355004294	4.85155093018206	5.32415887122129	5.08190893322397	5.75238489085187	4.86440543693114	4.90227254115364
23072391	6.16887647955626	6.15321224852849	5.93190392429869	5.9634134892792	6.15164508094926	6.19203692814527	6.44265978122089	6.11265634956455	6.68124779377623	6.08554380247539	6.11391864035397	6.29164297873233	6.24770348314227	5.90551853789313	6.04796349089196	5.90634095935259
23072392	5.75979003366911	5.58077575518407	6.04346054595887	5.50836725327453	5.75081229100801	6.00128738378828	5.9198132410645	5.85136000229484	5.51659819222665	5.59602356144763	5.7250935810281	6.02410366008427	5.9400635288869	4.92086923806523	5.9821595342153	5.62096585473479
23072393	5.09779348451627	5.03306129625235	4.61910001123809	5.34085675312069	5.14371397741001	5.44977414842403	5.40669262389738	5.47617929341317	4.90216768294052	5.00850486382106	5.18984199089264	5.45630684871177	5.27907821861643	5.08777629536776	5.1930137306008	5.07334740459785
23072394	5.20033907589187	5.46899207092568	4.99164551875706	5.46950022980953	5.75887912890868	5.65687530057751	5.71735484945281	5.66325819829851	5.35062849556788	5.41707471560651	5.73379977212281	5.90487491139817	5.6639348352755	5.43992514408583	5.63712776104271	5.31043466563398
23072395	6.82117609579655	6.82677549435768	6.97556626155697	6.88230140158979	6.60325692297647	6.65093603494699	6.915019492189	6.80676916395567	6.69905570834486	6.48050574365393	6.80630299661637	6.57851370260642	6.89027222700948	6.46178891372241	6.68549716827171	6.57859166873817
23072396	6.23848539038377	6.69680022178537	6.66440438703058	6.52329414813818	6.7333131497924	6.78816082438587	7.2026424252013	6.75298938991805	6.73896212488867	6.53956944712582	6.64645712258267	7.15834022257796	6.82382763970003	6.52762687778268	6.67909474580552	6.55741109339124
23072397	5.84409561868197	5.88785309631249	6.04207119578066	6.34144263060424	6.16526681987887	6.01877164229777	5.71850829419143	6.12936478696835	5.81614963089208	5.60444272582867	5.8526640892538	6.24550512169179	6.13367000443553	6.09760330677443	6.01747510765966	5.88814084719207
23072398	8.4660494328402	8.61446952927663	8.48925977618649	8.66049882412187	8.72182640830696	8.68788632356244	9.1230563369065	8.78314321932855	8.72953623704178	8.22389746329833	8.52559186708564	8.6446392580293	8.73949965950587	8.52330538055381	8.76221399470161	8.55006720213656
23072399	6.31363718306618	5.90396358484534	6.13972528332746	6.06169589609337	6.32253310886615	6.11389563040108	6.19196173587614	6.41409423685496	6.21729173330742	6.34502325298194	6.52796274980279	6.17980838164346	6.5101617227057	6.44693725307132	6.57979827858885	6.10365492555105
23072400	5.93314439938809	4.97591154426913	5.62466298697226	5.68506438392748	5.8349086861842	5.78886789995296	6.15990760077684	5.47731992902801	5.85469699267766	5.62311752366333	5.8911938893007	5.85874156781544	6.04853048527102	6.44715278412783	5.69405783146434	5.5941778562846
23072401	6.26150183166703	5.63935771164607	6.05545504237306	6.17983117405924	6.28789502052234	6.00143811383412	6.38990252578458	6.15684236064477	6.00236480719629	6.2801477756765	6.16062552819422	6.49396879066806	6.32406180270282	6.07069024432331	6.33139817272494	6.00797942666854
23072402	6.6835683038335	6.52548688973786	6.98471890179758	7.00632243011785	6.7700320150518	6.53752057918991	6.84102760081274	6.71587608587131	6.97443010935315	6.58159084272134	6.94705501136769	7.10017901346396	6.94149398177596	6.58271833370932	6.94160661831755	6.53396794186505
23072403	6.82350562708448	6.97576570636542	6.96533159364192	6.79309908179443	6.76653473121821	6.69567990105817	6.76675887435344	6.66352026730024	7.38012320849247	7.19143765915502	6.94954610622044	7.12693997063934	7.05643620256123	6.62454093359832	7.12353788207911	6.81403023268049
23072404	6.00823194560454	6.23437383401726	6.29093940486526	5.38532027612868	6.03629075005855	6.07378854214991	6.43730990576832	5.88843187131754	6.03664657648032	6.08729027179559	5.84188558859103	6.00224675531843	6.21473142181921	5.75175976516989	6.34199269177013	5.81726912834324
23072405	6.07284868534085	6.16452610298148	6.46958512554303	6.24942960113696	5.83858482256688	6.10538329853447	6.71237740917907	5.99244771923375	6.13277581501262	6.28092105585634	6.36596453487994	6.174998202781	6.40795959065359	6.14420429361217	6.41780986437471	6.34063579818902
23072406	6.28116086820778	6.3544418276122	6.34829968015366	6.43347888459153	5.79044533706334	6.47068352623668	6.37603275917543	6.69216706344169	6.48973627841551	6.35840837191867	6.57674614712126	6.56168339250392	7.17600182153587	6.16691378208661	6.81874434404891	6.51503373239705
23072407	5.89132081862959	6.24315253804988	6.20038484480586	6.15699092707829	6.31238402119585	6.31750814762615	6.82781796220155	6.36044884540843	6.20854148826437	6.05402109407731	6.18290397331015	6.84147366937592	6.45610364966686	6.10201658875488	6.10293791899711	6.00378021441931
23072408	5.85315735798876	6.02389563573281	6.03291834306369	6.29180220834644	6.16314119978348	5.9811527197414	5.75068632158906	6.01127646432057	5.84332824992408	5.63723309244326	5.84348553845135	6.26566462216843	6.00170428432193	6.11801016084199	5.91394639237864	5.92093121380666
23072409	8.4660494328402	8.61446952927663	8.48925977618649	8.66049882412187	8.72182640830696	8.68788632356244	9.1230563369065	8.78314321932855	8.72953623704178	8.22389746329833	8.52559186708564	8.6446392580293	8.73949965950587	8.52330538055381	8.76221399470161	8.55006720213656
23072410	6.15279157274899	5.72194339304124	5.86819834762405	5.9704915693766	6.12542945823911	6.07298007806964	6.43416711155545	6.24856109099703	6.20244639249969	6.08461431418922	6.54965288897968	5.89425152559101	6.36229214843846	6.16176421724243	6.44947899847043	6.02635357986598
23072411	6.96069450583255	7.41646316691531	7.53259125548995	7.14263105812207	7.16069979461608	7.03082025357749	7.6864323402774	7.09905775558294	7.38671469870027	7.49976427153655	7.24171106208579	7.21468822320501	7.44397579407056	7.3412193706003	7.11129377060205	7.0565858573963
23072412	5.87928840424844	5.76977778559383	5.95152896824143	5.62527639920768	5.6082731841669	5.37116151243314	6.36970369511019	5.68059224167865	5.27125528606477	5.59102149974246	5.728830861516	5.75238372301919	5.67984537994563	5.56539590082549	5.54020492462373	5.4489172083753
23072413	5.41293886143347	4.48451487081419	5.47896965772274	5.33988805086727	5.3031238422634	5.41177700741397	5.67504244164317	5.34297861011897	5.54644303881855	5.17054739345687	5.45384246443918	5.64281876802373	5.72343819930569	5.79796454059737	5.2655163855689	5.25359140686093
23072414	7.37118331976562	6.88771955094312	7.20923631488557	7.29947914551402	7.41752760320902	7.13313331245842	7.26894560163362	7.47041503874931	7.15726921488333	7.27823683060974	7.20189663631963	7.2850020304076	7.37366569591898	7.24333408000734	7.24936207247449	7.11719897811165
23072415	5.18097486475436	5.39438790178934	5.53939222420168	5.36040334964801	5.53808876250092	5.29624742732178	5.84564214107776	5.35055984942201	5.24307551273769	5.21438251840698	5.32713786057994	5.10561038731802	5.23991000025242	5.12793698665948	5.4915152924197	5.05162442991859
23072416	6.39243399095967	6.1871936729712	6.61470435970699	6.311519716077	6.30919280181092	6.18130639938422	6.50978000654441	6.26487605118153	6.63436984903585	6.22028495607926	6.36798963553627	6.54891829368881	6.49547027623853	6.20921691292195	6.40458566279592	6.50361035962624
23072417	6.31448689731045	6.42279653612976	6.36361416682909	5.94677813556919	6.0102245640785	6.25288219367154	6.54775172757217	6.05672216273052	6.54925678179735	6.5047662161159	6.26210770528707	6.16681293023589	6.49212506068987	6.32620723619166	6.41686383362788	6.10841481038268
23072418	5.91358322892916	5.49393546273518	6.11346270496012	6.15361964222216	6.0923928604715	5.92535283694942	6.01347890597319	6.09341391009455	6.17533786664353	5.78180219268552	5.97204177307924	6.35767958799613	6.19263293036986	5.74263565005761	6.27896074478942	5.98866670639491
23072419	6.30123578916647	6.06748607093134	6.52508034686622	6.41806206611297	6.27327981484247	6.21192451536855	6.92807399271014	6.26179190498556	6.40297829398692	6.27857167496927	6.38011584281423	6.38699911822655	6.42217519269943	6.18483169228031	6.55105677108477	6.13101943363175
23072420	7.19454990468938	7.2756945853434	7.41844636493505	7.46173962966138	6.97427170103064	6.87486873415034	7.29264814644972	7.59804136309552	7.21040558338802	7.24907888479219	7.47516697077071	7.72375444317539	7.86601528752336	7.13927674416705	7.5692958104139	7.27556383559951
23072421	4.61695306216507	4.70346403323515	4.84702090857034	4.7615014347625	5.07948335393693	4.88305277244345	5.04521485820964	4.99559988053216	4.67878779588012	5.05204692514816	4.72193647226125	4.53069243996473	5.03057100798481	5.04320633044117	4.87218802925125	4.65772088184051
23072422	6.20972806853494	6.66366411635902	6.66454889580896	6.52434440775001	6.81108883653139	6.77033995033738	7.20103356045901	6.75403964952988	6.57388572919917	6.53227135059248	6.63991657377278	7.16630871455694	6.87379777966551	6.52108632897279	6.59021513051991	6.3448057782952
23072423	5.84409561868197	5.88785309631249	6.04207119578066	6.34144263060424	6.16526681987887	6.01877164229777	5.71850829419143	6.12936478696835	5.81614963089208	5.60444272582867	5.8526640892538	6.24550512169179	6.13367000443553	6.09760330677443	6.01747510765966	5.88814084719207
23072424	8.4660494328402	8.61446952927663	8.48925977618649	8.66049882412187	8.72182640830696	8.68788632356244	9.1230563369065	8.78314321932855	8.72953623704178	8.22389746329833	8.52559186708564	8.6446392580293	8.73949965950587	8.52330538055381	8.76221399470161	8.55006720213656
23072425	6.43990064419637	6.54486512747963	6.252605805784	6.10875620377896	6.35237120093144	6.10163880177912	5.97114520773586	6.42767816595717	6.8020493439741	6.34949095445691	6.56298365402997	6.53685879904111	6.69178567445517	6.15215384311534	6.67666783590359	6.28336283503533
23072426	6.62747781388577	6.32287699750497	6.93234225304111	6.87999910357211	7.04946131975816	7.00061367207139	7.38527807759222	7.16973574348255	6.61883839163538	6.96591468285467	6.92379656364716	7.43318844082074	7.00456449901094	7.03985507797482	6.82548613265886	6.91675369139841
23072427	4.42547464718113	4.00059712572919	4.58255600243546	4.47410727463488	4.73329157489858	4.43530313983621	4.87911636879408	4.31444925587601	4.4143120132897	5.01462988169533	4.57765193917916	4.92179818783874	4.79409143072423	5.29352578885467	4.75258921945054	4.27574331198914
23072428	6.73284714518497	6.86606869990302	6.97977100786193	6.94739682902889	6.68009536077251	6.68243181711682	7.3630221495422	6.946025723552	7.03381117000027	6.63328519921232	7.00003308530361	7.01872124455948	6.99200756076654	6.81758260505789	6.95731176928086	6.46873973263342
23072429	5.68002003679523	5.8599855513519	5.76654691342836	5.28333827394831	5.8177986150393	5.59352351261631	6.16725610155861	5.70313399134613	5.7759855654837	5.71263370135272	5.56496623641215	5.88183143599942	5.8843417756649	5.48152531671985	5.74198090622678	5.60133441200923
23072430	5.74644277900836	5.82017678123129	5.64384143338698	5.30866703007441	5.91703449026866	5.65218912207367	6.05094798353143	5.48850556854258	5.66889670653724	5.63335543776737	5.45038563372817	5.67440522935968	5.74844419516331	5.42134028563528	6.21678727994107	5.79979866730518
23072431	6.30622747487355	6.43406965697567	5.96066073906888	6.62987416507518	5.82597887187929	5.96043411211937	6.30380907034445	6.17072872332077	6.48809327513139	6.61532177161899	6.62014113448963	6.81789393693199	7.16892941639711	6.26316603001944	6.6920922874123	6.186339794499
23072432	4.74869187823588	4.86601767578994	4.71082854224977	5.00172382010128	4.96710120555137	4.84581465389038	5.2026661016803	4.71219862386015	4.76765646345631	4.69904288937458	4.61420147880551	4.50222134239384	4.48944021027703	4.89676847411391	4.61017523605272	4.56674716999503
23072433	7.13764167721143	7.35020054776759	7.26035560847338	7.32645378733268	7.60111409271931	7.69489423016231	7.86741449368493	7.7630825915449	7.24898042489632	7.11521317220086	7.27932296735912	7.37406721435798	7.55782287920282	7.06336558624738	7.23191857408679	7.02441075466992
23072434	6.08950025884051	6.38321878934458	6.57600845056516	6.73777162214249	6.44758883480088	6.33302107437602	6.78754552022087	6.55559166360168	6.26058270521711	6.06035345007734	6.24847926550344	6.72797264775058	6.49141732391904	6.40475643958643	6.25400650578648	6.150596079663
23072435	4.36214770297863	4.50124727724295	4.11858056034322	4.39206970230731	4.61050060491617	4.64357789086448	4.39436502647547	4.51762448389369	4.35411045479362	4.4024534089962	4.25299760562331	4.49448183035843	4.16457569605856	4.65137489924194	4.13625917486222	3.81076351794742
23072436	6.20427961652701	6.47460167818163	6.34085469361145	6.24855091327287	6.58442279352983	6.57610768186155	6.77795969406382	6.39583354709285	6.4028952486573	6.36867943095864	6.43703437496038	6.60926787701585	6.45913446188935	6.47416029058844	6.55648159829332	6.15477689915918
23072437	5.26804377003574	5.18243549211872	5.60167165963332	5.37810997318009	5.48327679103377	5.37940735251575	5.61392775793275	5.20441048282858	5.7854867297704	5.13036507036017	5.38006595869946	5.7589143891645	5.5624057739325	5.30073678030117	5.44567488495576	5.31758896862147
23072438	6.37481278504131	6.62319417504603	6.48523225208829	6.49117859429677	6.49763316454091	6.65689950555647	6.89033385608574	6.92531134926469	6.44380632595587	6.51230548578909	6.47715791044246	6.29341490992345	6.54840408725859	6.28035371972108	6.42416599019491	6.22427022407024
23072439	6.85047348387722	6.64368525636064	7.15944514107382	6.93789580668476	7.11721494552124	7.26654585530439	7.3387555050185	7.09878702170507	7.15941365056372	6.8880547507067	6.97908801907287	6.67365878685074	6.98153934107919	7.08470117654946	7.16474691747306	6.59120379700536
23072440	5.11091444218116	4.62951597886996	4.57735169778007	5.03599579238042	4.28545445876363	5.03833733721872	4.99536827471438	5.03641143356041	4.8506346439272	4.78703483606318	4.81808344359394	4.80740768177524	4.81677286241022	4.87686201170395	5.00351796363432	5.00950034144833
23072441	6.05370000219103	6.50871823050347	5.92433414255703	6.14412471303221	6.63393233226829	5.97195867462525	6.07678297705406	6.31184423793952	6.04678707543561	5.98566500445466	5.87774542371394	6.24431108921512	5.60423585880592	6.29691759271592	5.86263370505785	5.7425321676603
23072442	5.96910262592791	6.29384329433902	5.71568142887631	5.91539005016933	5.99579523634237	6.43050753441426	6.29298537803938	6.25516617174402	5.76128629999163	5.97070247460232	5.66454528210713	5.57446255009004	5.91479952247025	6.19848389878507	5.63049103710637	6.08996385208175
23072443	6.97394698466116	7.31188701910331	6.70149696747881	7.18946500483251	7.07652180193825	7.10766662061252	7.29672170709178	7.42059251858616	7.13761363870242	6.96353635714732	7.17274179543913	7.18564767306743	7.02785055132245	7.16435015172688	7.27204759736837	7.04333717111477
23072444	5.00525438558669	5.20932208499525	4.95224266958908	5.3736476846774	5.02904855281014	5.57502863376369	5.26742989442455	5.4257052501227	4.968022655958	5.0166050331243	5.28258027565414	4.79903795661079	5.18703801520162	5.24327559688288	5.70519524517523	4.83534974733279
23072445	4.67136441339662	4.82011264642138	4.35775804410169	4.76152225747301	4.41287939850781	4.38463932437654	5.01681860867954	4.89129920729893	4.47931916360178	5.04030569960764	5.12157231374714	4.82225151145516	5.50680812534768	4.94929802430855	4.5769324792804	4.82593130109829
23072446	4.3539193891632	4.58698992144355	4.02729855060369	4.36664307710351	4.53558245839109	4.15693672166495	4.06533320546439	4.43416902760708	4.38480303343522	4.31909346803135	4.21712923324757	4.46696843539273	3.92817450996235	4.28307013934532	4.15376012371632	3.94920166224112
23072447	4.63544462661361	4.96966613260437	4.92192061973442	4.92219380006702	4.78647507509634	4.96571377439741	4.76027616911407	4.9841601441113	5.14369645591532	5.13068070512174	5.04793328825611	5.04927718281024	4.55900806684445	5.14919524381693	5.0141599656583	5.14932630386937
23072448	6.42072056972972	6.83617372862177	6.65871756385777	6.52603356903381	6.67384038277781	7.08622418450803	7.04432073201307	7.16923824916164	6.9387533256439	6.76999756046737	6.85801926068441	7.17477258318426	6.96712571449297	6.74901131470768	6.86773092765689	6.8299451316601
23072449	7.82759684973895	7.90349255381681	7.94488751111345	7.61296242776505	7.69671245174449	7.79972765040906	8.34726406572714	8.01522105523297	7.78387890549356	7.71323450184098	7.78506628667001	7.7220553704222	7.89811822601924	7.41503869953091	7.44838750371438	7.69206313321281
23072450	5.55070863061096	5.40400206930543	5.76012010993611	5.2335601742651	5.97571606927066	5.60323425474504	5.89837316367988	5.9930696473949	6.01205038162734	5.70890329694732	5.94141492556341	5.74555702290825	5.55300984182078	6.40015603343229	5.67440377676922	5.9382559453721
23072451	5.97983229290361	5.50563383107713	5.79984609417171	5.94510626306861	6.15838622600966	5.79984321633436	6.58457678244361	6.19650049863988	5.99243584321956	5.83345468985665	5.57305438940046	5.52442501811297	6.06173102682653	5.33775390746599	6.00828856115458	5.73703488471149
23072452	5.97549857714883	6.23557365295874	6.66935379594357	6.45831654745415	6.36448776682124	6.16437307408858	6.7765698361179	6.61565913763576	6.50009613092236	6.40132469922419	6.56673352011555	6.87095553919384	6.35691415901093	6.38195477338391	6.72703747752003	6.4455213697934
23072453	5.59754485298666	5.52980261546901	6.05859510296462	5.83628836940411	5.92145853216978	5.70844277597453	6.13590053739754	6.2692848911009	5.81517361529073	5.74653893574962	5.88570405648987	6.02035247174226	5.96558988265042	5.90480750239968	5.97719208171119	5.75202931366494
23072454	5.2668276955808	5.32376918802423	5.69625175073896	5.5092767780421	5.44612650179599	5.36059266596964	5.73501886245974	5.46125447229211	5.64489258755988	5.61583468094105	5.64383598016172	5.98771174165583	5.66252963942505	5.49104931584279	5.78651064145011	5.40827771292573
23072455	5.7642402260172	5.7756629758783	5.95871451980973	5.56469111948927	6.34918637648208	6.25387858455326	6.65093340720671	6.36652009149885	6.01524576419525	6.05795609357003	6.23249644362684	6.04424393692642	6.47098886326285	5.74265925437882	6.20505733757645	5.91831545901291
23072456	6.38590195733576	6.61545978483787	6.698235505362	6.28368833578121	6.63112796089103	6.08206151359618	6.88928140752607	6.21078103957301	6.13105257455654	6.442338466917	6.44378220737073	6.46123981495471	6.6118902700604	6.55157526583861	6.77964935418081	6.329926478875
23072457	6.17857469468337	5.8858523337102	6.28074494816345	6.0122834728044	6.64862044699488	6.35429794497738	6.16702603353195	6.18159324071528	6.29021595777016	6.04676903166497	5.84168922786011	6.25869421700536	6.01927082438541	5.99021013707003	5.95166754204844	5.98415223517719
23072458	4.53242104011095	4.80290836887926	4.8189081165611	5.06131745203402	5.32450685518334	4.90970564603729	5.27619914784106	4.89913952719385	4.42582397568171	4.68777204652203	4.55048717427137	4.64075746788574	4.72846426378211	4.50274120226151	4.42054707828177	4.9829942985367
23072459	4.54919754546588	4.7367850608882	4.40153502601465	4.72120042729647	4.9466318793837	4.51263495620793	4.55632927778459	4.63879839248697	4.53036164899693	4.88524447393653	4.1134034254229	4.02163092993398	4.45065539978636	4.58358958527938	4.48281712089237	4.49031126190686
23072460	3.8988463147908	3.72645336866572	3.74817527487317	3.96929575103995	3.81248684014774	3.9278515389361	3.90856217220762	4.00947018110851	3.74077716032274	3.81426918013441	3.93701204569444	3.8047003872888	3.92879585691098	3.95549909546905	3.93997490125749	3.8131136535831
23072461	5.67784406555799	5.88748705232691	5.86501245732513	5.80177363533177	5.73084730953537	6.14094934305916	5.88608825762104	5.97620964167784	5.7073398447824	5.85211854851863	5.947137903378	5.98211628290321	5.90588883954623	5.76420155270395	5.93598182723623	5.89643545726028
23072462	5.19157940672391	5.46870428813491	5.06272966661988	4.99561645793911	4.9481819751566	4.78683357399812	4.7406232080337	4.7485160631288	5.29724367762143	5.61485440553131	4.92734586330243	5.61002239592251	5.29842232039543	4.75025336674865	5.09142442531926	4.74566261499487
23072463	4.34564705670692	5.01971936920297	4.87435446077145	4.46163730265995	4.49157817687612	4.58168578663157	4.72170958172335	4.44804959869475	4.23857012159925	4.8985111652699	4.25194548144401	4.68550777508643	4.53547680878276	4.73582713485201	4.49507737069122	4.62068774284733
23072464	7.47201780694679	7.26242640358797	7.36326539641971	7.49402073550698	7.59858882885183	7.76942203452877	7.5530615430143	7.74165541919308	7.49410697364456	7.34184049699111	7.4663244077066	7.69815764890452	7.59405885085774	7.22633793764042	7.1929403783116	7.42933821676595
23072465	5.92023106573516	5.87561411706414	6.4544184294497	6.51660913086066	6.43059841808994	6.15960192038991	6.13065062727622	6.40520139002969	5.93666770386899	6.14196587784165	5.87631538884821	5.95561566938939	6.14497812763065	5.78401039262183	6.24430458563334	5.96433521018636
23072466	4.09956428856077	4.15023577372113	3.99320378582853	3.84274740775267	4.34090767159306	4.63559920479981	4.18103592984657	4.3013737238812	3.81560661586862	4.29241152550218	3.73099563833155	4.27382478078511	4.13325884109665	5.3313296564693	4.22831272050037	3.93039187193141
23072467	5.69860668617392	5.54078845773765	5.31058277942302	5.62730562055505	5.47913063337734	5.33944463080788	5.23418752109384	5.61133098156852	5.50316779918264	5.40308669551501	5.60898295483629	5.64312495166351	5.84622011192287	5.3497166767359	5.50963252018451	5.5357255792059
23072468	5.98535621196032	5.48399002761584	5.81958134366229	5.94576073821917	6.12067407318587	6.03666310641219	6.27028509411383	6.24197348229767	6.38805063433941	5.59526706388885	5.79820399969559	5.94027712703896	6.57045792077786	5.66665077743662	5.74987878145457	5.97083774800749
23072469	6.21073191460134	6.48577013287932	6.42109661618194	6.41168926505557	6.58635785482053	6.56722660286916	6.85556009236845	6.53355451404143	6.44029968932515	6.26209938669539	6.43542703367663	6.61412530983797	6.60435836292414	6.39202854419471	6.66602296118576	6.05636332229852
23072470	6.67296096623067	6.48664100395725	6.8431237774511	6.50841296679793	6.60020112901222	6.85046058659379	7.2084136425792	6.92427765637951	6.71069258340123	6.66273615794317	6.67055281840228	6.62842312064943	6.80169165997804	6.4437928925926	6.41684366654588	6.25843487152304
23072471	5.55070863061096	5.40400206930543	5.76012010993611	5.2335601742651	5.97571606927066	5.60323425474504	5.89837316367988	5.9930696473949	6.01205038162734	5.70890329694732	5.94141492556341	5.74555702290825	5.55300984182078	6.40015603343229	5.67440377676922	5.9382559453721
23072472	6.18062677410532	6.08345046689039	6.47961551411576	6.37129538861314	6.67281567166218	6.54229557075013	6.99948853256241	6.4727770276205	6.36130795988757	6.54795661492275	6.42568043998177	6.31777897732993	6.50122333541973	6.4468559450305	6.44977231481516	6.38486422115504
23072473	6.29865181541496	5.98035649040318	6.59015644918555	6.4146087352495	6.53204802764259	6.08206151359618	6.88928140752607	6.69854324846806	6.24031763263406	6.30742648627032	6.47686176726511	6.66693192205454	6.53064008708871	6.25816064161518	6.54552798301388	6.36923218044067
23072474	6.00630512507454	6.07116872788422	6.57254573403894	6.37503965773979	6.49391276665893	6.67852643906634	6.82384859411422	6.72521327878877	6.49244394813299	6.33091123413328	6.42983523489869	6.24947335499808	6.55623468711882	6.55026059262233	6.89180169093749	6.42465143047728
23072475	6.95065331241592	6.79430487340034	7.22389303988381	7.03576371291659	7.12064617443278	6.84490987338741	7.60040994994946	7.33924846778347	6.92536983930718	6.95967896631214	7.12872423592669	7.34344161554423	7.14637362126307	6.94755609647953	7.07361218501446	7.08893476916001
23072476	6.72115783959085	6.65038416237597	6.93195285190953	6.50144383732129	6.9276729091485	6.61687080994051	6.86493921281794	6.76391172384828	6.91982437739448	6.86307112028031	6.72547509470715	6.8348682503785	6.87090274042299	6.45388383103286	6.56494871554518	6.47388559903621
23072477	6.64971006445671	6.2536508497762	7.230277341115	6.45544248903195	6.53508967716366	6.96148246307714	6.76786236445124	6.98219339299018	6.85756661489791	6.55977961869263	6.45265721979698	6.90251411829526	6.64049963453387	6.2291168970772	6.34219592343114	6.32623339638416
23072478	5.44484007028502	5.23717522154652	5.10545467687799	5.33954294273149	5.41244746376579	5.46533977732287	5.44237585294673	5.47146654179732	5.12827538281401	5.63179007516875	5.02127506827015	5.33926943849395	5.27419497992142	5.72790811665124	5.57415684698272	5.22585024261087
23072479	5.06062056893144	4.98831806894485	5.1040577758464	5.20078974521325	4.89122478390576	5.29728652711317	5.22643932579852	5.3702627709495	5.19612779597805	5.37875144064602	5.07282150447332	5.71771399615762	5.27254859947251	5.66195645720494	4.89304260351295	5.29754344583628
23072480	5.33323746897302	5.27467056780918	4.80061990529467	5.12112091466171	5.08925772005996	5.06212910416846	5.51052329087288	5.32397651421971	5.28099101887723	5.28543959327422	4.8922653628412	5.52950427731458	5.34015990393915	5.53408674921321	5.10113055787918	5.30798371383091
23072481	6.06736028273391	6.56393571491582	6.10524216371135	6.23562277077225	6.09107677763454	6.63850284581901	6.38014671831515	6.65927578482963	6.60703754634675	6.28550872903491	6.23121885718433	6.71505778159246	6.36080453729893	6.53880852578768	6.43931848646754	6.00459602167913
23072482	4.73917377336434	4.35891586181532	4.42794830819003	4.78681645407986	4.83702625135482	4.20797907363846	4.26781372186745	4.4636072477437	4.70787418577407	4.80640684325142	4.12660563147298	4.64930504277217	4.50496368717821	4.36409209318249	4.44922017330178	4.29193022073678
23072483	4.09264067143922	4.05240498464214	4.11744146561199	4.11811243397086	4.96815869018657	4.23246749825034	4.9168063657881	4.46305724759641	4.5198585610501	4.38273735467052	4.23424903415543	4.36281478729849	4.39226262102726	4.29061520650168	4.60074328579819	3.7931922148264
23072484	4.72059845561543	5.0941921338519	4.71419020177672	5.427939734419	5.37814070796875	4.94838064678196	4.76846968689832	4.82011733257469	4.99886911841625	4.86946418134446	4.87722979238309	5.13138285170449	5.27566039962446	4.67566095387836	5.3259151916094	4.856414810181
23072485	6.59973795486018	7.17225361387244	7.01930798588401	7.05470550267671	7.20805661515831	7.17282554793871	7.39252855738267	6.89766613175212	7.18500901164206	6.9227809881657	7.09416656049178	7.47758622059136	7.03461074369336	6.93182654075012	7.50088827133941	6.58848854181874
23072486	6.55747003326948	6.39285420425129	6.82725272393475	6.57991570718116	6.93563457019253	6.82642504544431	7.29653097311709	6.66600374288588	6.56553300868469	6.77285760165104	6.5203222768335	6.94305879744425	7.0836180073952	6.54318515151283	6.76255356675769	6.84810493597717
23072487	5.16889056336055	5.83189064702811	5.29529191814089	5.61137035069835	5.58505761914612	6.12438263195379	6.02547204331011	6.05615082513347	5.42964115739137	5.62960897356816	5.61808849531099	5.24251527427438	5.80702103972698	6.15756656524748	5.57953598472566	5.74811852752783
23072488	5.01774205312837	5.17644396322702	4.79881606199436	4.76682230747855	5.51645294404214	5.56876946154226	5.04446808509619	5.08683135029428	4.98065579821797	5.519991136444	4.70527983169003	4.75574347715499	5.32805027697597	5.31368941185564	4.72231200188057	5.28976576234794
23072489	3.89975047953473	3.69658086901668	3.68935328443894	3.5003556685767	3.84191267998299	3.65633129374162	3.4290691889137	3.66263192056567	3.5637995589999	3.68912527090795	3.81117646226618	3.65771569937332	3.77030003271319	3.92796896961953	3.84496627233917	3.64980025259848
23072490	5.48267681320984	5.48037760248873	5.42690670338087	5.46440820360389	5.84933385975169	5.77769756058299	5.41301442511681	5.54128588261387	5.28321606785318	5.6761037281937	5.01740497476223	5.24197098280067	5.51651471172245	5.83934985371839	5.49479478929509	5.54944941370116
23072491	4.27697011214806	4.86053335180805	4.44447078205636	4.86850541651751	4.8607097832579	4.95301623206199	4.18163604933906	4.63491202674314	4.68853086968103	4.38096875491512	4.21350738568941	4.35550072143865	4.27750371741095	4.72931903853445	4.51217146631313	4.25763287411301
23072492	4.67906023452362	4.64944386597485	4.75082965053769	4.63280407121225	5.24600561840053	4.78581250255912	4.9316198929269	4.89268675336893	5.18865238824419	4.53437799343173	4.81623553761213	4.93278447069025	4.61701847465796	4.77957508812665	4.83541039920203	4.13930010836182
23072493	3.94745429388946	4.10934957793207	3.95953567640598	3.75897143456022	3.88179122386366	4.13317526732058	4.29603457680023	4.45919749635361	4.02777160184812	4.03794899232411	4.07544725613352	4.19031846363734	4.04143668945179	4.61778841396331	3.99596849303743	3.92938160105722
23072494	5.12691087934596	5.04999393434545	5.07178104870645	5.50387974953924	5.02399691106761	5.45729031699034	5.14928864230648	5.24807254928957	5.18247906178214	5.07036043836564	4.93063545190854	5.13325382684523	5.10263061979181	5.5377225836501	4.90169988715879	5.22881336786476
23072495	4.20351176718927	4.6211344138006	4.31979915611518	4.34330540603419	4.48140713050445	4.45130792004658	4.61446871696473	4.77332454759646	4.39196760118981	4.43138086337389	4.40215745424918	4.5566182884275	4.53684837535156	4.87870871887932	4.54765676368384	4.25740357075829
23072496	4.93158088010803	4.90265001249441	4.47250921964253	5.01988682468339	4.73406218661757	5.12092694012319	4.69953292303058	4.65468236984429	4.93565104586719	4.82154639647079	4.95839007622954	4.73603112607054	5.11810824222258	5.39254651311552	4.74438667601425	4.98197610601163
23072497	5.54022608410073	4.85828929019421	5.44486169570621	5.21738376836114	5.26071760689976	5.41018751254803	5.68693005430091	5.72472367104095	5.45901505336285	5.28287313698132	5.32928635311699	5.29123538390742	5.62866210894525	5.16287200136086	5.1545050319705	4.82507088571876
23072498	6.86646697141385	6.98032633446165	6.68579280587502	7.01061080487712	6.90562193107435	6.95088808543019	7.24308150542802	7.28834594364302	6.78851572903255	6.78729337414332	6.99467166948961	7.12282574267746	7.00145687261742	6.7993752818348	6.81422503417793	6.73361319895742
23072499	5.85491763040026	5.99180815510969	6.17283675708291	5.97049501459757	5.6940923424595	5.88318159010189	6.58546785588849	5.6124050116771	6.10056671760603	6.10882158037299	6.13977856134541	6.02741759283272	6.06027297099262	6.16643399120497	6.11881446117198	5.81673514819939
23072500	5.78115614282284	5.5321611880824	5.68544354361774	5.17760725169685	5.57168281945003	5.29197312164674	5.64147190376013	5.21511159289547	5.55156438281112	5.27083181827558	5.14613746011593	5.3780178812548	5.4947016334427	5.01380753211213	5.68014712331205	5.23203337441431
23072501	5.21519282777796	4.99700964825489	5.23950805000407	5.2733131329117	5.66834060301526	5.5542877626977	5.77014724368975	5.80093241692847	5.37910077093716	5.18033148380948	5.34950258252694	5.80691286374169	5.42412522997126	5.03374198187668	5.39030182610941	5.312042141472
23072502	6.51948494449997	6.34015777292698	6.63976867910681	6.33729232787268	6.56310194062742	6.76839602659098	6.53004568992574	6.86486406936668	6.21961946900802	6.49098773001556	6.5413639791999	6.57067134841664	6.74464046825046	6.5117671252344	6.29539833095749	6.27625351976254
23072503	7.4088950431891	7.55509087206757	7.7165990397314	6.98118593224668	7.3904967084452	7.4619516476605	7.90596976526662	7.75329628876285	7.49466884120149	7.34483052079501	7.63020356893248	7.42121655046225	7.54893746760085	7.47611583313971	7.53035703371763	7.27049132752018
23072504	6.1586679241771	6.09017233094998	6.59242103857422	6.44031282021875	6.36127534485091	6.24804167656815	6.43315225788849	6.73906520098833	6.43678693040808	6.39604163963624	6.52557050221155	6.87301345938481	6.57329160610573	6.25492935150849	6.79796807414547	6.3638219787663
23072505	6.90226375371103	6.70298570278871	7.20958056468097	6.9522066903979	6.85020734253368	6.77671353401381	7.09939190677176	7.0121205896077	7.03702704762721	6.88313546984342	7.17199792639294	7.32570157847289	7.0736157595056	6.89840898629235	6.84633609726267	7.02709616782878
23072506	6.68266102203195	6.607905288526	6.77430766034681	6.34951035280808	6.51427773948075	6.51737491060524	6.86557244340578	6.90136671750423	6.65190300789743	6.7582705680274	6.65236416643181	6.4160968517134	6.65231047233161	6.46258382683004	6.69076418224668	6.12726997586063
23072507	4.80997047863696	4.53964269077219	4.5720271858025	4.45128461025328	4.51717071083969	5.04325085957612	4.48319218175646	4.51593752279192	4.60515078917585	4.89388133187703	4.25153192693515	4.43839870353508	4.61438779108367	4.84876877783075	4.95436218737297	4.61559775663713
23072508	5.87808096363281	5.79666588981805	5.98500300223438	6.18514701127369	6.15050175740219	6.20691689129423	6.45004367469281	6.34004461120858	6.08543041513195	5.99741132282906	6.0828792369418	6.24106034501991	6.15019707104923	5.7030092621351	6.21323787506614	5.85365349647562
23072509	7.50583937382178	7.20147040085116	7.13154307813376	7.47305783520579	7.55539141766587	7.27165502687032	7.31576361056773	7.35566642525693	7.55974026815469	7.39344819380395	7.3375228003649	7.5431365632196	7.65597836775889	7.27343959916917	7.54406852418928	6.99473687395314
23072510	5.63617259101167	5.84570825172568	5.96844598449882	5.34064303717777	6.01300909209439	5.80659502464403	6.15963881013147	5.93601240945648	5.56319102028255	6.01333846919645	5.86925650769684	5.84771785876939	5.9624180917574	6.2761043648551	5.74459037751759	5.66891254539859
23072511	5.96682125540775	5.71548450238452	5.64639170486952	5.92990942348031	6.07768657474903	5.60093650673861	6.02023810105238	5.45717719187051	5.37161964833922	6.01963665525135	5.68947084403957	5.95933568511474	5.94784459502071	5.65760484519194	5.69021451835282	5.63425685862049
23072512	7.72093148424907	7.61077179089677	7.97463910265635	7.88056556970917	7.90786279377856	7.97204109518602	8.26023628546027	7.97857423407466	7.67377501193866	7.82230350135033	7.95440064605856	8.11176886956907	8.15323955499326	7.95215043929797	7.83911855016122	7.77994200616275
23072513	6.05519361600501	6.31896199482246	6.18917556556701	6.31506928388041	6.36612042239763	6.39583438871073	6.78177708031401	6.73950617254985	6.09632226717882	6.20562410943547	6.2735766071302	6.80218141769044	6.76805737858423	6.32925143452507	6.51089705211148	6.19070090207723
23072514	5.09328755370135	4.94808389461796	5.04377423872048	5.0327809909139	5.20387297911711	5.09164808537586	5.38887091692837	5.2401323882025	5.43205523753405	5.20955988733723	5.05216341868054	5.45139144888172	4.82820117275612	5.1231913350233	4.96436840885958	4.65531219003174
23072515	5.68715132118888	6.28633358255002	5.68239881989904	5.58853797428352	6.09823819218914	6.05613147037849	5.70007768222951	5.81851658845705	5.68350757637248	5.829908091242	5.90643755898975	6.08020079477056	6.10772610592214	5.70183312183196	5.69581423029932	5.5268775494649
23072516	5.26996387413362	5.5974370386512	5.44447160299081	5.37512636821652	5.5298464554233	5.16097872412922	5.4633495254353	5.66251759930771	4.96829244483319	5.35117453539674	5.13396588945323	5.67554612475177	5.289264972842	5.65526697783114	4.94067764025701	5.05425206338857
23072517	5.85284108912924	6.2725825543793	5.89232681712779	5.84550231919843	5.98546812184632	6.43397668769458	5.84906477530876	5.97127218481934	5.67242807156214	5.84882061892106	6.08125302022753	6.29658322562052	6.27202392023688	5.87732769589585	6.01303410230355	5.70959585805867
23072518	4.77719046460223	4.72329003879316	4.73393892674461	4.71060931133887	5.53668170445899	4.87365033032727	4.95451389080534	4.70257102096807	4.88899572404797	4.72511096544538	4.76267658628242	4.95530321748914	4.90809694827192	5.44254764498562	4.846052380027	4.57855009412501
23072519	4.38049185497007	4.72321114971571	4.22867872968924	4.70224710230087	4.51393041562602	4.96133344997791	4.48152997314981	4.70179897150221	4.35223827170496	4.08460321782012	4.35724819976565	4.79504098833067	4.37756831836426	4.53758696347521	4.54589742569474	4.18706342067175
23072520	6.85092082713474	6.64504224778365	7.09666290754314	6.71105671609527	6.76892773006634	6.64435779358615	7.16224412117383	6.95348961893862	6.80337778935283	6.96138045084635	6.87001312839481	6.78593555351164	6.99000202074463	6.72043298809664	6.49792286654988	6.33523443134073
23072521	5.55070863061096	5.40400206930543	5.76012010993611	5.2335601742651	5.97571606927066	5.60323425474504	5.89837316367988	5.9930696473949	6.01205038162734	5.70890329694732	5.94141492556341	5.74555702290825	5.55300984182078	6.40015603343229	5.67440377676922	5.9382559453721
23072522	4.39808138867019	4.25087405443137	4.87294268225333	4.83487686202493	5.00801953382558	4.45909926155106	5.07827517210601	4.81328821183667	4.63865710704062	4.71943706576336	4.94255482577419	4.96470108553043	4.87088665846931	4.33045785765149	4.92129083556907	4.74398557940856
23072523	6.22008957995387	6.21523940845729	6.60452876758572	6.39326483598828	6.18742166870501	6.24731905184738	6.64115039966715	6.58136911495311	6.64250674767005	6.38011114825771	6.53457208686808	6.72556669447817	6.5968123178087	6.24546460818313	6.72780960169363	6.3221487643861
23072524	6.8515853390362	7.04965325588063	7.31990929640085	7.16815029540951	6.72031046841764	6.87978700069074	7.01380418124159	7.01619839926679	7.29671741236859	7.14230179947918	7.21266967585972	7.21623838828675	7.19934204805364	7.10904440775275	7.08887134363021	6.9238072152319
23072525	6.65345301053685	6.54741724932979	6.51274615140699	6.13808680698317	6.51374352405356	6.44387423779081	6.65657814679694	6.27613371605771	6.61605830586681	6.47211684095439	6.15156214652983	6.34043812220382	6.59558191176084	6.32228287291357	6.4789233234193	6.07166757391337
23072526	11.5043816302483	11.5888105159419	11.4731347584034	11.5181473706504	10.8719049771257	11.0401330892789	10.7085917903859	10.5856223623134	11.5225728907408	11.4802237508093	11.4624921025712	11.542623676468	11.5537020217522	11.6179814725945	11.4201510294139	11.4910590932001
23072527	10.3167808951074	10.459284282405	10.2238576231565	10.2197252025809	10.207744189259	10.3779444250058	10.1377044520674	10.1933531289368	10.3910287346116	10.5842097279372	10.2757174248668	10.3203861988009	10.3882169702039	10.372151847843	10.1845765070617	10.290739010219
23072528	9.8679938546686	10.0086860622024	9.81826287584934	9.88015765785511	10.0778842601265	10.1253990817013	9.87062948045838	10.0015078654118	9.9138391678321	10.0213144324458	9.86667716908686	9.93803636505939	9.73253125424298	10.0690577743336	9.97652582989082	9.9228084086631
23072529	7.91984667290925	7.84101035518169	7.66348026748835	7.70168999739198	7.31391089516986	7.50487030106855	7.95561274120212	7.60852332249612	8.05669319109299	7.80938520108893	7.622306721574	7.80242662260682	7.75820142125141	7.9722294218351	8.03849958191965	7.7520163857535
23072530	13.0434098793863	13.0174882119747	13.0589179145824	13.0317740111128	12.0677183459171	11.9084529574983	12.0589275835726	12.1408093371985	13.0601220623341	12.9363428261167	13.0464891167188	13.0422095009539	12.9718493562084	12.908070261262	13.0190406470028	13.0292887504265
23072531	8.19243198167049	8.21127305762541	8.20524738452969	8.19488940242002	8.54408619522721	8.12732123538608	8.8425849779567	8.53602403366468	8.26904556778066	8.3024779826698	8.34788111684823	8.5243063739427	8.38994793940111	8.30275559060274	8.34004810936943	8.2761410659475
23072532	11.6314624205013	11.3463241593321	11.2304555335421	11.2305087581115	12.2483364244626	12.0610522462573	12.2224141659804	11.8915135458669	11.5485325076804	11.2936635959649	11.3390290044153	11.2695652548662	11.3198961291199	11.1029943193761	11.2675542142026	11.1747761603786
23072533	9.28085693664515	9.44354493094593	9.65863416708062	9.41526739940567	9.45607281155444	9.73255565971334	9.99692879430368	9.78553676816822	9.62237874587087	9.38486423608645	9.59783915232897	9.84980769855827	9.86058679657571	9.25543791579851	9.76191440035935	9.5334349326636
23072534	5.01293736752485	4.71368640309809	5.09366049537457	4.54804776571062	4.67319537295368	4.70020002779102	5.29645645964797	4.96105149157285	4.49693067797046	4.59486629775628	4.52433550350278	5.4276185878291	4.81506577841683	4.70696660815078	4.70421767467134	4.70852651381411
23072535	5.93314439938809	4.97591154426913	5.62466298697226	5.68506438392748	5.8349086861842	5.78886789995296	6.15990760077684	5.47731992902801	5.85469699267766	5.62311752366333	5.8911938893007	5.85874156781544	6.04853048527102	6.44715278412783	5.69405783146434	5.5941778562846
23072536	6.3550417273857	6.84596326999752	6.88443812909506	7.01274544005469	7.0079718514921	6.95403440909293	7.50459622313716	6.84480338603132	6.91460281372822	6.74078244135058	6.49417842305191	7.34446639531052	7.1816118814123	6.72437632796335	6.23001685951839	6.68668730581653
23072537	5.60393756156103	5.58442270229736	5.62049276857124	6.10291692851635	5.6809656479233	5.65748703207828	5.30392097554388	5.96372205191099	5.38107121271536	5.07847732839799	5.48619881092453	5.83113536435794	5.69345085474533	5.87016903571437	5.81193656180639	5.47377108985822
23072538	7.26996150293868	7.46254321043329	7.21672397810264	7.37799890328498	7.32635847984022	7.31710607306901	7.63088824401819	7.30565716564972	7.40915364965208	7.49714941121234	7.35789831336846	7.25402344290001	7.52180259403658	7.57589133448739	7.39743205387585	7.13672978696958
23072539	4.26524931886917	3.85873166625236	3.82798350208255	4.43719110074962	4.21042514324752	4.22472789006665	3.98767794780665	4.35657691194881	4.0847418852445	3.76404498190828	3.64597887317951	4.3397596884777	4.06206759114946	4.03918310479774	3.98962978829485	4.19780656425404
23072540	6.64989432412141	6.90300905707201	6.89512618958238	6.98447294774212	6.31858044297491	6.57711920808462	7.48609977147632	7.05367900060705	6.69567199670014	6.93278969131063	6.69527184411501	7.32847598084965	6.67839604836741	6.89344564160927	7.00790966688793	6.73781589504337
23072541	4.70883640304246	4.7550570247661	4.56018679320638	4.68423236553047	4.69290717218823	4.84975098095692	4.71461120583488	4.72126812098453	5.1615666771172	4.59108512645329	4.85690305130433	5.36635525500493	4.91649128361751	4.7571275438226	4.8799748304358	5.07882874869293
23072542	7.90079811138075	7.69332445024138	7.77211032407145	7.73544147206621	7.82225743205133	8.13898599966326	8.39872148399531	7.86698613600486	7.88340249494083	8.07253373470544	7.90887087716526	8.0825565388684	8.19829020281058	7.94387434487171	7.75979804374287	7.58097352522359
23072543	7.87744340986508	7.6914410354655	8.30098689762187	7.58713074133848	7.6793938481642	8.02407284442401	8.47692201200243	8.09125772078855	7.69473021329103	7.87878966862434	8.13711988435882	8.07300241424199	8.3390484138349	7.88475343684381	7.72959843581445	8.02256461121356
23072544	9.55255797062888	9.70381695395103	9.51571923188223	9.69878473396076	8.82411961795298	9.25031603891148	9.24179796148973	8.9446362777988	9.5186755652946	9.54646006216092	9.58585090360726	9.51588083891165	9.53731722362509	9.43740590370584	9.63983031978111	9.65020098678377
23072545	8.66035523123218	8.9021569704572	8.58372281125102	8.63116719707809	8.48415363168193	8.7871481927547	8.5756638752404	8.59645951294322	8.51861781331059	8.63216365137656	8.61140613303445	8.5402317807009	8.50930181882043	8.60267380409829	8.61733748973533	8.47568591862901
23072546	7.51848662364068	7.54713716025254	7.92145377224845	7.57738580915118	7.86881926077067	7.810886641221	7.99503910772183	8.14627632228313	7.63913000605457	7.529340375152	7.43667585022542	7.7328571490277	7.64654118040162	7.30607757804856	7.69558712938269	7.18416554447651
23072547	10.9831599339461	10.5804521605787	10.7660854924712	10.7444914548476	11.3217352809173	10.8258482053163	11.0895013454389	11.0875251840377	11.0837719280538	10.5238548849811	10.7693545294262	10.7787233768349	10.9091307820799	10.7160279052992	10.8449434572077	10.7560228958342
23072548	6.94980685315663	6.85360272398645	7.27465106476362	7.03300085240167	7.47743485177032	7.88767223430897	8.26971886978628	7.65297565768892	7.03350997187364	6.84696487739426	6.95338157164873	7.73104476148737	6.91323640504208	7.31404888952563	7.54597552370111	7.24589500321407
23072549	6.98386409190747	6.67641641122621	7.04712027440059	7.20215463335378	7.11177356219591	7.41156434040825	7.40058482047475	7.38726022591692	6.80025641200395	6.93414683621025	7.17931181274388	7.17141150007793	6.8773120134381	7.21336170482243	7.02247392437402	7.20949300241555
23072550	7.34308701518856	7.63899700560978	7.5330827973356	7.36337504201437	7.89808188865132	7.81262347032288	8.47689902313241	7.93645994869596	7.4697299630287	7.43370427562583	7.44396905566731	7.8042744689499	7.70809930009018	7.63998239322841	7.47926629575791	7.79711710464218
23072551	6.71433892782857	7.19785793907521	6.93499530070716	6.96711225089491	7.14810086544176	7.4212029719512	7.70508139065588	7.1507311103248	7.18280875167368	6.96872132516917	6.8181526281277	7.28518122775407	7.20494950940209	6.99747422127331	6.79541365718675	7.14020128009917
23072552	6.51831621506227	6.4390503831174	6.56127828570271	6.97948967558671	6.34719501606103	6.77278513944829	7.1375110844143	6.65829597391259	6.63031995452183	6.35526563125702	6.08359566707161	7.3568082554448	6.19520536832235	6.19471658297823	6.325268001611	6.21748845632129
23072553	7.52131346625001	7.7002380745233	8.00159894958572	7.4114046836261	7.83469591978487	7.36164362049451	8.10498516585939	7.9057302540566	7.68737990519919	7.68505126427028	7.76889112461032	7.77963763251095	7.50284442575431	7.6171236713336	7.87270760776731	7.81617897728619
23072554	9.2939967064021	9.01286779477034	9.31024044044621	9.25395814533992	9.75222962859843	9.68119929269088	9.67240712250041	9.58126517181249	9.01174981263621	9.16054386801304	9.2006392597311	9.1135365582424	9.34291214857458	9.26766335191452	9.17181582309619	8.90937312743986
23072555	4.98143442931989	4.96229294114385	5.11278854836178	4.91818396300006	4.87348351774662	4.88487154261927	5.03862035488289	5.07552390720105	5.0103730863273	5.08784652017339	4.74318769104173	4.77022381889504	4.98683765902709	5.37031136937741	4.99104214981574	4.71784095076571
23072556	7.0811332275927	7.60343635207098	7.2058537833079	7.59494127692615	7.98903187979977	7.99070116356973	8.22551078791174	7.89722913198513	7.45297563893658	7.5247952314234	7.31548438242831	7.6063812418925	7.39704937493668	7.4775591585365	7.84012226739874	7.20356643870326
23072557	6.34011924165224	5.87315345801496	5.62565117271063	6.15501081398754	6.0272505700335	6.14907699255941	6.61634975823047	6.13078595170825	6.54446721627246	5.621918674215	5.60256774858315	6.01210571832198	6.08701557867251	5.92814870724825	6.32407580448411	6.15668676951032
23072558	7.32231864342804	7.58139670927108	7.41336630035412	7.25633261045845	7.80601892543054	7.54035747680729	8.15683382505455	7.90047004134812	7.37123383045556	7.3103173371276	7.4200643150493	7.50478062911899	7.34175619624324	7.6346221271853	7.43725009137059	7.30575027376498
23072559	6.69700133588904	6.82012175279127	6.75335388085175	6.84453399272081	7.09394379390019	7.62807330692047	7.29800533768103	7.28230635075817	6.76617952027198	6.92500286595954	6.76254618720252	7.04768786055849	6.95083701968997	6.61903278422625	6.9857052120877	6.88632366375921
23072560	7.1170781356089	7.35750974510831	7.22316744793174	7.38680219201434	7.47977385698587	7.25108670478766	7.29198390647564	7.23865394322628	7.048804108858	7.28052794768175	7.22017375468865	7.39175318988239	7.48995104832662	7.31801961124243	7.03019901945296	7.1398971614089
23072561	5.89869195707242	5.96443429804733	6.27137212366868	6.31347497912009	6.31749285505141	6.05555678524199	6.32769333657982	6.02635152718881	5.76437830474725	6.24735661581432	5.64744227510132	6.14810190311471	5.97168752944552	5.9126461950934	6.34391542095605	6.02157269017494
23072562	7.30201658416485	7.18293201198804	7.41708280907373	7.20072504742763	7.6339851172145	7.35842240036589	7.42409465244382	7.43864926173651	7.23079702298238	7.30828588590541	7.12786663009567	7.34520315145698	7.45964820552639	7.47922200933558	7.57230809828368	7.25091319885244
23072563	9.24237600117961	9.29965587220937	9.27918852426819	8.96322385616594	9.42488546152163	9.59045226176726	9.17646811755204	9.34066929750536	9.24836282789528	9.28279225886274	9.24607432791535	9.48141947163384	9.3631660959902	9.24691233695034	9.2030664707349	9.2302115701243
23074022	5.34023138322859	4.73559967925942	4.81088238909459	4.57716082631349	4.87338384503641	4.98617445922033	5.2109729223573	4.77787133553102	4.77826014540983	4.50084864827002	4.61195391295914	4.66515013542389	4.8592382945143	4.76242718679207	4.91114151310501	4.63370470403346
23074023	3.96347060201452	4.4737103531389	4.09179306887523	4.1656111793549	3.85619800458064	4.11222726962845	3.94515913932419	3.93376167615306	4.21499745597798	4.15414029588003	4.09895184374303	4.34102269254802	3.93749223085316	4.17483188229078	4.14045189514308	3.86598196853766
23074024	3.96389589638245	4.16165186896738	4.1786829373057	4.14993907534905	4.42739387042309	4.48497570261823	4.50138615706303	4.26392850176893	4.1961168283419	3.73276045734033	3.71708932043086	4.06970103730107	4.44395784287414	3.98742636397586	4.21534571826613	4.2010863899219
23074025	4.6631646704802	4.69956556349967	4.76203545471442	5.08258279700563	4.73392546994417	5.33773184853703	5.69696543349358	5.4288468847027	4.77015213224468	4.81110263079216	4.8479297081139	5.34236644023077	4.91542678772105	4.89323543989813	4.88309200030269	4.92689958285987
23074026	8.64156166886401	8.77608855287396	8.38971268476024	8.9173256329798	8.691175050277	8.91825592348996	8.65752288428772	8.79276214845309	8.82988948677243	8.73029259131051	8.61513076644937	8.58308065254332	8.85082725762554	8.87427614446207	8.80915510896786	9.00937735797129
23074027	4.63840369262416	4.72538801160442	4.89964552356653	4.67438024242052	4.89544949722632	4.29602833888965	5.16690293865955	4.62115122067189	4.25587246844427	4.9363080935931	4.65109455103541	5.11687810611427	5.01055623025622	4.66754340994462	5.01396803386885	4.5831690747672
23074028	9.68566004867044	9.27042515325786	9.86760087608601	9.6596600269698	10.4152103603013	9.77569679273052	10.1416966968468	10.2958071197761	9.69620149238127	9.34025453165353	9.51989851089268	9.35696440188702	9.46783831167376	9.48607933916175	9.69013844261915	9.39534337878327
23074029	7.64085275340279	7.66086241364612	7.31872047203272	7.62218561709784	7.54541497233052	7.5844150655473	7.3673828707375	7.85264819006093	7.53007432074982	7.41767304296999	7.62550333985438	7.31207036124839	7.5725384585732	7.1212293769478	7.3182134121642	7.375890397675
23074030	7.17505203749914	7.23894095753767	7.63371886421663	7.38805724938679	7.52779263893736	7.51844957848473	8.03792020896427	7.35681199305745	7.60398026008398	7.39262203557447	7.46746381187102	7.22048527209305	7.77036221335499	7.43172997614956	7.39650654690395	7.24972419418434
23074031	9.93388221854517	9.94694034572994	9.90402864413405	9.95182399105717	9.34918309088894	9.1575624390858	8.91242966927608	9.30617745785755	9.95256927141888	9.91343462180279	9.90221086157774	9.86411074430047	9.85061209115743	10.0222028072247	9.70254036387835	9.87791808852767
23074032	10.0330645821791	10.751604378281	10.0447098325699	10.1019283942134	9.46121252143225	10.0191760656798	9.56073478266871	9.42400498880969	10.0628380820349	10.6008147230012	10.0957954416201	10.1744733093281	10.3077003837934	10.7414524677613	10.036921997697	10.2514670885601
23074033	5.60751682907254	6.20752223943872	6.18917665680341	6.03024511035955	5.87406172624302	6.26372345259481	5.7152991350787	5.65033113327607	5.77279157799241	6.0605394757294	5.87183237649869	5.86417583058454	6.17924548352069	5.90703085343138	6.0421051936704	5.69910712204274
23074034	4.80580029870384	4.82380979029085	5.25054946798565	5.06177609680177	4.87702123437016	5.08470592205406	5.00486454944652	4.9775254941239	4.88668570707956	5.32622959423444	4.91840503411855	4.65506470496598	4.83005228707097	4.80400523841931	4.93973180973783	4.92128336406003
23074035	6.61815627347495	6.81881541606525	6.97534946036072	6.33142692690771	6.8154538940808	7.35804941788745	7.12561285744735	6.45931849853355	6.78076200360934	6.79214596567583	6.81274967336112	6.85142968250326	6.7017767805614	6.96891969691012	6.59085060765703	6.30345516714684
23074036	5.9926130061594	5.89565473995438	6.32615547278485	6.75162959280322	6.27205897936746	6.72524368092522	7.18960943760683	6.84810055574282	6.3728007443145	6.30615736158677	6.51378907908469	6.76790279239968	6.70043178780919	6.37816426617054	6.42041691324042	6.19498399381459
23074037	8.13808765019393	7.70041035126349	7.91819191106281	8.04225365451063	8.23210475210999	8.31185692052074	8.49690466602744	7.97301165725864	7.88436739451339	7.81151594883999	7.93960564832984	7.89680971545291	7.9706762552778	8.06642495681442	7.96293490865783	8.02117001149297
23074038	8.08853567289223	7.98386261622775	8.20345374304632	8.14810863719454	8.05224197572311	8.24781937210881	8.69368878450356	8.32372314998216	8.09735628154718	8.19180480989527	8.02467488177707	7.81564543856348	8.27825527148091	8.05778385143756	7.96478231393189	8.50943146327013
23074039	8.41700122314172	8.41105986046683	8.37604805698513	8.56984976532885	8.82592279437666	9.18481016332347	9.51678779910867	8.87307286793803	8.17092623713765	8.57369066876221	8.63158245102784	8.66960117058087	8.62329089204585	8.50163394096181	8.80392487983948	8.40085799601588
23074040	6.54971107392327	7.11861604166088	6.89720552729417	6.90125184122468	6.78974196037586	6.83497937188772	6.50252088713309	6.4884971471341	6.88885321540317	6.91892187584427	7.10647310263281	6.84733165843522	6.98539515524245	7.17830523844199	6.76556942821612	6.93571308485672
23074041	8.38998344020184	8.47236180088633	8.55706512461678	8.43553096051929	8.55208979824881	8.69437681504175	8.42487014400999	8.44507286534988	8.26451137572653	8.39445726773505	8.55116391542042	8.51882271433351	8.47144347463561	8.48292669141672	8.40031138689552	8.35629798388426
23074042	7.49952931151085	7.26119467450963	7.36880070285444	7.0912894067234	7.35011801271641	6.89175886929597	7.6013711475706	7.16126454036419	6.99153847498339	7.10275605684078	7.27846698009484	7.48671713062903	7.7339968981545	7.19267719994208	6.87620617839946	7.22021896689529
23074043	4.52499037772848	4.69122758629594	4.93403351990862	4.8012281570395	4.61361316262931	5.06493687688032	4.7387227591047	5.37565614664624	4.77771095262386	5.17413331852674	4.89834969108027	5.46430785790373	5.19845062810846	5.10457489452532	4.92305114480708	4.65116079503441
23074044	6.75220594249979	6.67367639527405	6.53648816589523	6.59521517671581	7.44241507865197	6.82993929582158	7.10977909455632	7.42062956296457	6.34308521410826	6.46291316501567	6.42408776988062	6.67166449760755	6.5726170614116	6.08269384923055	6.58976947169878	6.42403766158804
23074045	8.8171773698265	8.6687564648203	8.50454142543647	8.60599743480321	8.52889157439256	8.39681615483328	8.26499803871872	8.48916721061665	8.91710764461035	8.85543544564907	8.48039940343874	8.59130743916165	8.82671282013466	8.72190764108449	8.58343147051598	8.64804479937742
23074046	9.10779762869188	8.86048344532777	9.00980309776004	9.15707612409075	8.69371999535009	8.07850618018256	8.26840786283318	8.23860581080975	9.42534358388747	9.02015669077165	8.9070608293314	9.24210676372642	9.7149731622624	8.97014407674951	9.09169040082266	9.10496804296171
23074047	7.3425034699847	6.81650339639469	7.00166212797499	6.78478202716868	7.25497935375418	7.19136524466289	7.18444128663895	7.22800848407691	7.22483002573155	7.15618185798468	6.86585268110311	6.61332498791798	7.13185539699744	7.12800099462091	7.12889651324637	7.31723299058898
23074624	6.30973404171937	6.0379305428143	6.49550750055162	6.34011379892395	6.50583750795394	5.93779918761379	6.02336380221129	6.29578589106209	5.90992446774507	6.07415739586719	5.96883404339197	6.02112862230179	6.1568826578527	6.3000892608009	6.12800273658528	5.9812869845761
23074625	8.12309014664719	8.32318663281085	7.86267592978342	8.0877811361922	8.29220131131243	8.60445746613757	8.00561035269617	8.57165930942154	8.22040196405063	8.20025917367541	8.46510589220582	8.2233747261584	8.02715125300041	8.0983210142859	7.94491405859584	8.06430530671884
23074626	6.49653448694583	5.65216174134288	6.07138527751959	6.46381184432061	5.98979625820655	6.60967468196485	6.13095612771485	6.40434296095124	6.28232396068011	6.20400182427554	5.982180810454	6.25865159868922	6.1347315934962	5.85948552694664	6.34730599358689	5.96551957165627
23074627	11.7864686677483	11.62742253614	11.7528029614423	11.528409688293	11.8432207891298	11.4665739209523	11.4440212177044	11.6149524994302	11.8819401976562	11.6197273745265	11.7510234642148	11.6821314884652	11.8912516052521	11.6073598070872	11.7961566602113	11.6102638997311
23074628	11.0652212246297	11.0804385962774	10.7434605915973	10.8686600837651	10.7762894213354	10.4252802982322	10.4211059957403	10.3956085934269	11.2088905493271	11.154775632304	10.8989439760184	11.0045553009731	11.3493491260639	11.1100370054055	10.9813299736888	10.9124251398626
23074629	8.26604022769975	8.198834688228	7.97146619043468	8.38477996617561	8.39605821840181	7.94307628568743	7.60218651527329	8.45313017076199	8.24524178536477	8.05389638088929	8.08036179668296	8.21464293109223	8.43231267776666	8.41738931457482	8.21166447240723	8.40424772619475
23074630	11.507098860926	11.3999473317305	11.5908787333668	11.5793084590137	10.8427023011695	10.8426956300359	10.8673261454809	10.9807289499275	11.4918018419094	11.4071001317268	11.4930030117732	11.4343153628917	11.4161289284631	11.5342957338406	11.5929237297739	11.4717075240894
23074631	7.2013417204906	6.6844563600075	6.93855934205888	6.8328138347805	6.91887120871845	6.82534285119987	7.65572641493903	6.92462311376418	6.89286227132975	6.92462778380882	7.26183021981394	7.29165997082811	7.33762130157751	6.59859670726847	7.25706094150146	7.51595104998128
23074632	8.39237756467591	7.99376152836098	8.08712327034801	8.04336355109215	8.31522978145138	8.30435047845187	8.69136014575273	8.16457161420398	7.74379607430808	7.96168301174577	7.99794691504428	8.35752232586198	8.25109140143813	7.94059670701006	8.02718037236296	8.09409404689188
23074633	6.6035358583233	6.15674848056795	6.67251550917488	6.46140638925845	6.29219010218121	6.47120163379113	6.56988809472629	6.4295480325426	6.48375541280768	6.62444725488931	6.54651748009203	6.83283680049348	6.55229179725536	6.81067696035809	6.50120608220942	6.30411624234524
23074634	9.60350538183554	9.39847361350418	9.31843465648276	9.56115894276775	9.94487177197262	9.61915767171983	9.76126154617459	9.73017665212982	9.67425168046424	9.18968992570469	9.57238025950801	9.32923583447828	9.55509049201251	9.36997265437947	9.5364439703694	9.48466166054501
23074635	9.14609761477542	9.15560838142176	9.28659399164674	9.41866241595083	9.26543206334282	9.43276631782256	9.76445575527467	9.55558003432579	9.13163464191422	9.25973026552873	9.45096927191359	9.40118047850929	9.08780536882555	9.17729749892954	9.40104355768672	9.46808429431013
23074883	6.38604599971939	6.44644119427359	6.78042432342136	6.13953982552407	6.70719712909814	6.79631187439374	7.05841886815444	6.79620549457639	6.56705702091464	6.68755044029192	6.66824430533164	7.08858351256904	6.87399441223667	6.67811664826219	6.63649222998546	6.59291252622289
23074884	8.78025761699969	8.7282539003988	8.86607218560949	8.77774994110496	9.04183489478384	9.11315377118466	8.72722216693366	8.38010373526483	8.81085588949825	8.83452934603577	8.9595232099845	8.888964899832	8.7087146960994	8.78721192796351	8.95113571627697	8.81682582583358
23074885	11.5649873392191	11.6326153030566	11.5940603709517	11.6726888875337	9.67953419410765	10.1005806496451	9.78582890081977	10.0331718650161	11.6607516480887	11.6815608599626	11.752986226913	11.7547251183846	11.6555917958263	11.5990096053244	11.6705047234784	11.7144449072463
23074886	8.06593499323892	8.21025676836225	8.21676755848035	8.25203585317859	8.66962751596956	8.62169839127675	8.64451667360869	8.55151657440963	8.2107681618507	8.3097415960696	8.16319692884587	8.2707501330077	8.31097200109269	8.10625107464057	7.79009027884391	8.11725260285157
23074887	9.85010428512343	9.74804248717196	10.1824690740874	9.9697031564892	10.3211576346789	10.1119474235306	10.4654797258838	10.3196584139865	9.8821311618341	9.82896632104105	10.0048039999739	9.86945571783657	9.90576227028658	9.69335722205224	10.0940226876616	9.78421652121388
23074888	7.84815554929011	8.14021022963168	7.90958931452973	8.12208347361641	8.21540889088035	8.63862948023191	8.41607285334432	8.52957560379128	8.17159824707016	8.14039792383976	7.97057738282608	8.23508906223426	8.26009686961463	8.24492102249197	8.03569713577561	7.87437233026886
23074889	6.38604599971939	6.44644119427359	6.78042432342136	6.13953982552407	6.70719712909814	6.79631187439374	7.05841886815444	6.79620549457639	6.56705702091464	6.68755044029192	6.66824430533164	7.08858351256904	6.87399441223667	6.67811664826219	6.63649222998546	6.59291252622289
23074890	10.1401477486038	10.5174622026388	10.430740712497	10.3362514716869	9.50505623502023	9.58650129485328	9.15262216850982	9.09613321293458	10.2378226917005	10.3467663194345	10.4432443865876	10.2242614711518	10.255611833978	10.4154733835534	10.43359241048	10.5036438195134
23074891	11.5649873392191	11.6326153030566	11.5940603709517	11.6726888875337	9.67953419410765	10.1005806496451	9.78582890081977	10.0331718650161	11.6607516480887	11.6815608599626	11.752986226913	11.7547251183846	11.6555917958263	11.5990096053244	11.6705047234784	11.7144449072463
23074892	7.34807170471928	7.2471951764649	7.54019709489976	7.3596953696544	8.05951423399094	7.70410628709907	7.96931266208539	7.6394241312951	7.58668199277156	7.61347072983983	7.54270124764196	7.31695395354862	7.06485721710094	7.55921307525484	7.52972566634258	6.9854513476626
23074893	7.64952109797778	7.5840649140507	7.67646891846778	7.50381664401494	8.25898423718949	8.10900890614235	8.12721967867618	8.21993122210259	7.75457937179099	7.83404617851992	7.6401491885276	7.66772065577718	7.57911429513225	7.63720210099382	7.55806963607539	7.18793828063404
23074896	9.08416684335135	9.13390552121789	9.21589760137193	9.33687590152655	8.92583494524464	9.16208370716958	9.44529449690221	9.00054300536196	8.76514877917985	9.07575336562832	9.30696964372284	9.08178369523166	8.61109378021484	9.10506250893833	9.25366327394066	9.18996025045696
23074897	6.07724139665537	6.38457969516124	6.64948235872239	6.40462587897413	6.46115174613094	6.25721218418492	6.63816207467767	6.38661268277562	6.63599401606721	6.1227403862825	5.81791983056558	6.23542971176206	6.2582013909217	6.20693355415725	6.24705626145687	6.62414572990509
23074898	9.70454432184082	9.60341164009822	9.85089668518342	9.72872041993585	9.1764983450669	9.12264505861575	9.61693850321538	9.31852751619209	9.79658280147007	9.43073686423404	9.82993589393549	9.46540047046107	9.48438087317095	9.44653922889699	9.84256718488388	9.73313439360987
23074899	5.36757433680022	5.32544348808512	5.22779962579452	5.34617572586666	5.44636435595461	5.72277009683084	6.3328212979626	6.08199227036087	5.82948376034223	5.32163018169607	5.53645706416841	5.79191571145876	4.92202241200513	5.42791706504459	5.71034194964488	5.99466561179921
23074900	10.4384915725494	10.2260193565285	10.4505198370714	10.4384905301482	10.7582623918326	10.4710391483283	10.4741025494904	10.5655230644653	10.4152167668885	10.2048520966734	10.3711935020599	10.1282161273046	10.4210486757147	10.2203104326742	10.3336468490461	10.3274183025003
23074901	13.4372936607079	13.4702659463621	13.3834173235734	13.4163925659837	13.2606971799756	13.2381077535657	13.179097104779	13.1501684892244	13.4170410848512	13.3928910674616	13.4539482235857	13.4992777383413	13.2946148120398	13.443878890475	13.3813180204901	13.4188615022832
23074902	5.359431800843	5.45407226126263	5.62633133667563	5.5141206857111	5.91079083310405	5.90906061086628	5.59467076101581	5.89802418878286	5.28794597629574	5.40208256117818	4.97656128385409	5.44571782517401	5.23239380962571	5.4259083089469	5.83080954854774	5.26019349199136
23074903	6.7875022695075	6.7439728222871	7.01747207379264	7.19487465459573	7.10257631276872	6.97932334037583	7.30700259783724	7.08698966847112	6.81053563949213	7.13414684014272	6.93086428104268	7.26641451237643	7.28224105763822	7.23688060063134	7.09307602803138	7.08927524460082
23074904	5.27671862611353	4.81574422661851	5.00195401424645	4.99297953227799	4.97765048599786	4.96220531013894	5.02633815997583	5.21562447397348	5.40322590104612	4.94175332370938	5.20150271359401	4.77559401571395	5.62700136944117	5.367582065608	5.37227006572376	4.85826908158039
23074905	6.39966562493395	6.05383155940185	6.12127502168447	6.3905027340876	6.71399721343423	6.65248418783188	7.0285777000541	6.73825664954013	6.36629886408967	6.38655632921257	6.62063991009526	6.00749913378364	6.39582067607191	6.09475884308985	6.57788817245025	6.76980037294504
23074906	7.49826213164243	7.67070212440317	7.46704637526459	7.67641881007501	7.85440247278399	7.60858298027594	7.81923190772766	7.71443293868438	7.40088770652418	7.71695334332122	7.51191328694175	7.74688051349441	7.56822854651079	7.41482029560835	7.83535715703878	7.55443510964554
23074907	10.3979423261017	10.6201527628912	10.3955128244398	10.2539657188634	10.1655388145153	10.4000341659927	10.1047006856996	10.1329481602721	10.366646885962	10.6943112302641	10.4905956616618	10.2627169733697	10.3512573669421	10.583068293754	10.3548806139293	10.3617982840802
23074908	10.7545233422417	10.9661494260023	10.8289068015776	10.878085516858	10.1646160848126	10.1090088450331	10.462346098616	10.2030227846467	10.7804552998389	10.7296253582655	10.6237414215208	10.8013330863632	10.6059999184912	10.8670124582893	10.7038433325017	10.8877823158903
23074909	8.47433668435496	8.13582718795986	8.46015092814286	8.52239813589259	7.64916542816085	7.74785414603728	7.90929845866951	7.64417313806846	8.6414771064195	8.37089423833931	8.46263560282161	8.42848601469595	8.24636337413288	8.36814558927323	8.35295752472554	8.55155337916696
23074910	10.1345412199181	10.4834058009507	10.1569760879159	10.2146904606252	9.42718745582575	9.50979269238791	9.51660327386047	9.47194096829142	10.2165351751005	10.2675292199954	10.0704764201287	10.4112813903808	10.0084234875092	10.3200741187204	10.1414379464229	10.2565838044509
23074911	9.13707164629473	9.10748371510204	9.23544433628504	9.29229503393803	9.36183163813078	9.55730606907415	10.0197929278212	9.66044642709642	8.74353022730029	9.24582382609439	9.32245047300377	9.41538099249973	9.49057459066714	9.01491520131058	9.16339617788611	9.28946038385434
23074912	8.52721425165111	8.17519935252945	8.62268723951597	8.34940124107663	9.01634215003231	8.83540177954684	8.93762239575528	8.75706459159993	8.13550572277302	8.17783122730898	8.26478505506782	7.89174918422825	8.28097760453447	8.14693127027092	8.4702771310658	8.33722327285876
23074913	10.1814555068894	10.2321955980923	10.4141508091427	10.3599255370794	8.79248415492589	9.03146899720022	8.68601947029564	9.04808331451866	10.2399030729544	10.1671847769605	10.3540843280832	10.3916311718246	10.084700851187	10.2127940522177	10.4283285558725	10.2994281783024
23074914	8.49070282437341	8.36773126292232	8.20278047095675	8.40375884326969	8.22149825072536	7.86898566588183	7.92713859623347	7.63622742745068	8.72018355977431	8.23440406493082	8.20046404218916	8.37664556904798	8.52039063115454	8.33305350055477	8.11473897259543	8.48043728316438
23074915	8.5312082852927	8.23154739601543	8.72392229095899	8.56908435022781	7.57618989042494	7.54290597853161	7.69705139134899	7.57347712130071	8.42329513166508	8.33504078911584	8.44510193788213	8.66129078012499	8.35839893778758	8.36526845189863	8.55047799906644	8.59089227447994
23074916	10.5695162571226	10.8713961854595	10.4897703977878	10.583597588452	9.71443813808469	9.75218447683956	9.69711093247964	9.50187462961776	10.5598698054479	10.7035163935925	10.4917831213879	10.5896919761059	10.2349701676736	10.6605745656277	10.4403163359035	10.6692454362392
23074917	6.23244698697049	6.22056014166613	6.09626735800193	5.74633822419823	6.1890209708698	6.25148623656937	6.71365707133026	6.14928880064938	5.98805448502024	6.09462280838491	6.16075576388839	6.38751383603977	6.13388904456713	6.19765375775069	6.36767470705198	5.99813779213575
23074918	8.84521333811739	8.85077209662004	8.67845555410829	8.75940329540316	8.93313942383311	9.06525998872202	8.87711420372339	8.39634233087962	9.04284228923753	8.64838222691165	8.67561125072933	8.70413372064227	8.92047561809126	8.48202989422279	8.64859527536281	8.59889916019494
23074919	12.1361819370294	12.0812471749278	12.254244745771	12.1558185881824	11.2652925865575	11.1891799739858	11.5631145803276	11.1894825654854	12.1505219557103	12.0811171301045	12.1882768948933	12.1236643886299	11.9422913275649	12.1275065471357	12.19660273177	12.1654265962219
23074920	6.38604599971939	6.44644119427359	6.78042432342136	6.13953982552407	6.70719712909814	6.79631187439374	7.05841886815444	6.79620549457639	6.56705702091464	6.68755044029192	6.66824430533164	7.08858351256904	6.87399441223667	6.67811664826219	6.63649222998546	6.59291252622289
23074921	10.1401477486038	10.5174622026388	10.430740712497	10.3362514716869	9.50505623502023	9.58650129485328	9.15262216850982	9.09613321293458	10.2378226917005	10.3467663194345	10.4432443865876	10.2242614711518	10.255611833978	10.4154733835534	10.43359241048	10.5036438195134
23074922	11.5649873392191	11.6326153030566	11.5940603709517	11.6726888875337	9.67953419410765	10.1005806496451	9.78582890081977	10.0331718650161	11.6607516480887	11.6815608599626	11.752986226913	11.7547251183846	11.6555917958263	11.5990096053244	11.6705047234784	11.7144449072463
23074923	7.62478440187692	7.64232757549246	7.63630660097786	7.60652032459036	8.31422276049191	8.13810171833389	7.98690760342543	8.28789283533528	7.92865988009058	7.89932766898176	7.69358118208498	7.90971534335424	7.81825073677164	7.68611558729706	7.7283510183177	7.56029185441507
23074924	8.04981950380623	8.15125853790583	8.03044679853852	8.18375303146803	8.57785794230917	8.6605676567207	8.60541967397388	8.57833155301222	8.16085929292935	8.41964583978516	8.2103366464298	8.59446585307804	8.43404429304578	8.40673801086126	7.75481369840475	7.92300389113273
23074925	9.85010428512343	9.74804248717196	10.1824690740874	9.9697031564892	10.3211576346789	10.1119474235306	10.4654797258838	10.3196584139865	9.8821311618341	9.82896632104105	10.0048039999739	9.86945571783657	9.90576227028658	9.69335722205224	10.0940226876616	9.78421652121388
23075402	4.87618336294839	4.76128092655987	5.15140344553962	5.10544851372965	5.07286599694499	5.43825824690012	4.93305141567726	5.01377466408141	5.05879659444186	5.07470355599358	5.14560101840673	5.17216081736197	5.16201389867957	4.94757460483251	4.88794668241815	4.66695921523645
23075403	8.45566331229727	8.63308423995219	8.51323011629538	8.69062151328713	8.23838723665072	8.73138095359368	8.37063690546528	8.29899105288697	8.32146425121868	8.85075596476831	8.42038874180271	8.33921596610439	8.44668193143826	8.67889488477612	8.41395541823197	8.64434643151784
23075404	4.42418158653974	4.48128706997827	4.49165476297299	4.34581596535543	4.61763738896733	4.47484505713393	4.45226977978503	4.83294079911621	4.13640070686268	4.53874531796926	4.41223819602796	4.50502255096678	4.41911741691004	4.24856948596809	4.07826453089171	4.43662911907248
23075405	4.55898794182419	4.26263411627487	4.81451724152766	4.55217227472437	4.81530976565519	5.23466073762468	5.27620450158207	4.48887404192256	4.45006484392213	4.70705402696869	4.40543912439806	4.80841583541161	5.07806786240643	4.42312465361124	4.45653009709158	4.45531955039069
23075406	9.3330170081686	9.50201677745711	9.47079129857092	9.66763382514305	9.12233227445235	9.51078791856324	9.1864375450278	9.05295840782343	9.48682571159753	9.5380175807903	9.59764995290634	9.4307793791085	9.48817333778137	9.6063242394351	9.54298546646984	9.51795613036891
23075407	4.71593188401777	4.534671911636	4.75175042692288	4.90917033278225	4.84154005584523	5.101350551342	4.70597930839683	4.76800128014167	4.55294417311412	4.81302850987536	4.59082562277649	4.68588438000827	4.5697511543316	4.68623255578723	4.24121633463356	4.72152581275426
23075408	4.2147439419584	4.42638263418386	3.98671294349782	4.48632571724893	4.52555417857166	4.94857057543272	4.21291556478943	4.39935715552596	4.41790985195353	4.82161730196725	4.32004311059593	4.31091610814412	4.27668734594172	4.34778797116115	3.97790841371125	4.51168394708669
23075409	5.4477370585257	5.70674880258692	5.74854064953342	5.87733085583558	5.94766616269817	6.96144489933383	5.84193161072563	6.29092417980801	5.5959322883278	5.77704287047106	5.59666518673761	5.95899988517709	5.7633014562788	6.14640417719071	5.56583645051559	5.35781109041956
23075410	9.07262027235214	9.12580899845361	8.76959691974232	9.00391854539395	9.33160772269135	9.41792246816739	9.19005107719327	9.40142066625851	9.06712542029826	9.15102953436051	8.99497422289891	8.94710803737329	8.74578988344953	9.24428558851514	8.97506809468472	9.1588776155153
23075411	3.79109236457947	3.93790675446745	3.71726902017619	4.06289487023637	3.89740031261654	4.49771991462071	3.73584567841006	4.39781690068313	3.94147929989127	3.91816063629528	3.7453949283344	4.28974924301084	3.54970251958135	3.84317302722582	3.87830663381223	3.91051581132864
23075412	6.14330066976059	5.9385049328044	6.16422685040967	5.92280291070836	5.37082087422377	6.22465939800556	5.73036417422765	6.3127990979244	6.04661908557209	5.9853946208704	5.91802298390193	5.57351095229846	5.80436110210406	5.69158121898052	5.55516899565741	5.61368591658349
23075413	4.81823247929319	4.53984857991114	4.78462578973659	4.5068270468922	4.75232940784536	5.11299150524563	5.05006346210456	4.88255148809149	4.77491149333957	4.82333125940286	5.25578233899782	4.81380202382004	4.78286556760841	5.08513146050063	5.03306838566285	4.54470367752465
23075414	6.63136725357122	7.03036739464343	6.9776132795923	7.0107912708558	6.96851550786735	6.38593722299189	6.77025766054306	6.15665610679929	6.76404527590438	7.06289574172037	6.28828304994548	6.97352655472987	6.9231714833397	6.88007969818311	6.67135707739759	6.61832108919906
23075415	5.60267959155344	5.32551864537593	5.6707581976927	5.7777805350974	6.05671101244449	6.07469531584643	6.08859985253273	5.73188519706481	5.72782943552376	6.1458248061812	5.87831172964219	6.08793009197069	5.6373918083613	5.83260815108046	5.91785428821438	5.8346667297276
23075416	6.22326329618325	6.24798963472415	6.29968906349104	6.33219833500896	6.53480422151252	6.51389294551951	6.79515928386232	6.49975911158635	6.02585848512128	6.25460118166851	6.2637575429009	6.20939188413295	6.40279821727398	5.65252504709031	6.35105818634264	6.44112077835954
23075417	7.86540220256246	7.56346288347366	7.8251607903732	7.68738929792673	8.16813624337241	7.93455683139912	8.1888601533594	8.08699980137188	7.9587292800397	7.6914548029628	7.73167077069456	7.94861224301322	7.76083754120176	7.86166569275222	8.05547803537663	7.71830869668745
23075418	3.97740872649348	4.28456191222913	4.16309016943146	4.26455030880578	4.70264095687595	4.3987823402672	4.01849330476311	4.37180894261019	4.2385565683302	4.5470891439832	4.0081615530152	4.01873415474057	4.23785790169867	4.08632424447536	3.80757168639726	4.03857261368849
23075419	6.21625073105416	6.75708080707467	6.39187922965417	6.6465804458071	6.58374621707393	6.66482145199697	7.19008080357352	6.52261731796961	5.73296992000465	6.26261655364184	6.27867050469694	6.61315398126803	6.3449975320991	6.51777222795535	6.79489377977082	6.30644462633073
23075420	7.56726416295128	7.64207755220724	7.59853834813285	7.21112588205716	7.76485762977186	7.68208469351354	8.32698953489045	7.82333576289218	7.37401113681601	7.74904100213292	7.34827713928923	7.72559366394891	7.64086687660588	7.48238727912435	7.69041200635093	7.66571762721302
23075421	6.46790455041688	6.48172088983385	6.03406458933793	6.37669428303465	6.35482131723851	6.60591655751961	6.46097535220663	6.10569588308414	6.51002450321583	6.33924083273578	6.25241593420519	6.46412219209029	6.46051899620098	7.08915053299427	6.33893357607269	6.37042854266971
23075422	6.10315976588296	6.2528098994483	6.3279856455113	6.36460116687078	6.6967319694664	6.80672599602289	6.54533588388397	6.52086613991727	6.36631385896194	6.27006755243926	6.24488954570895	6.62341698587218	6.5494070539813	6.24402349397693	6.27723020452466	6.18995107702462
23075423	9.10834313932885	9.27102823310389	8.61979225853724	9.2809390413472	9.16343725525566	9.5064565274835	9.58470648598692	9.14632949744868	8.95803613046476	9.06495959612411	9.13297696656782	9.14004094155547	9.24469071088522	9.12635564821994	9.01899033071838	9.09863465090661
23075424	7.30068011715546	7.23398261955614	7.3785405781974	6.87713997221014	7.40226965345526	7.53787903875213	8.03309195387572	7.79721619107075	7.34992260750411	7.41075118301162	7.36464201402565	7.5245765043855	7.59968004533469	7.47692463917772	7.50723863568877	7.32593485449799
23075425	6.93606395123391	6.85908660647942	6.7525482802385	6.72508702828892	6.70907305198318	7.30825699106557	6.68432616513528	6.7106788978753	6.64620678830339	7.15596841814532	6.45581535690776	6.38222191631404	6.74979198059896	6.7116623378223	6.26672193420396	6.40868129944842
23075426	5.00840787066321	4.82409881839207	4.97446950874654	4.91945387626557	5.35393525053842	5.24439234320532	4.91596440140872	5.22033082843988	4.83071357837228	5.34641447206675	4.88923775035972	4.93075285782325	5.11567733403564	4.96036419171204	4.6475851169491	4.90006564828581
23075427	5.32802841757917	5.68518602222493	5.71809635562773	5.90244003074609	6.12221871623986	5.84608750406912	5.95648296438799	5.94817477723406	5.79541414257687	5.91740950087371	5.73722009844376	5.45920179147443	5.87472205392368	5.81957430341884	5.57685223121787	5.59764354797157
23075428	7.55449315721035	7.73405153941502	7.68410859154596	7.27355905112019	7.90320215746174	7.68167469500232	8.26649860403207	7.86596222276525	7.6142746512647	7.85850071512823	7.39265573092867	7.80570380355101	7.67938090109591	7.54409890436482	7.65419403273366	7.86785423491311
23075429	7.27176819047437	7.12871364185554	6.62085516786541	7.29409691685699	6.96399748061103	7.42225152385493	6.93096626804105	6.99525861045364	7.22195683171693	7.08027075475433	6.95246163898009	7.06429621783107	7.10135359307938	7.18289423021289	7.25556978804404	7.11663299843809
23075430	5.04835730140933	4.98811619741104	4.88403871915355	5.12427312430586	4.43132744434265	5.14310324966204	4.81102815382348	5.57143222162683	4.60131194514495	4.63402175823221	5.156982926326	4.4624604823182	4.25648599723708	4.63984503837862	4.50095442876193	5.02401867304223
23075431	5.09678649156212	5.28836336013031	5.69546530702406	5.23501287380229	5.44852916968532	5.4980680379245	6.33833551941776	5.37603329685595	5.26112466818537	5.48313807700694	5.95737578945005	5.51292216297593	5.72924339750196	5.6219704884901	5.74370786587559	5.53180634029925
23075432	6.55475957533947	6.4942252332015	6.57851186081316	6.49431160380769	6.63689382464815	6.81206320820726	6.88430530785067	6.72775784635951	6.46169876280972	6.59898823164917	6.54638902207668	6.64848270134694	6.55077228183763	6.52058558599711	6.6090064599693	6.65752785354001
23075433	6.12435042251554	6.08650430560407	6.10106164278318	6.27322427701301	6.11358602948789	6.50671654693089	7.09900618211841	6.44501600329634	6.13925458652084	6.35679315405562	6.17393959798832	6.36424061278071	6.21206634973111	6.38111774116043	6.14702483161627	6.16946116509741
23075434	6.77847364446199	7.16499400215159	6.914580319768	6.70914471472776	7.14768781175887	7.02908496799225	7.73157374553909	7.21157349370884	6.81424782654576	6.89301592920497	6.7239214937457	7.0486766798295	7.00600580245077	6.84106000222865	6.7594878484832	7.34836759876354
23075435	6.90535725876211	6.81435380415063	6.04311491092979	6.82151855809062	6.59211869343502	7.25095725637313	6.65642295007834	6.82075667651718	6.82247367938857	6.6452643616507	6.40466076979907	6.78014792494469	6.81237982255661	7.19613250128045	6.63753664061099	6.69355535118228
23075436	4.84235398022089	4.89513576086675	4.63199156108131	5.47966918435137	5.2268451456336	5.30062289203453	5.0235362632958	5.45385638672275	4.95122767481919	5.11822722025888	4.78827110771888	4.97013334180118	4.84137540967319	5.19111056509028	5.22414385739069	4.96470480998578
[truncated: 25,828 more rows]

## Sheet: D - MAP2K3_TopTable
MAP2K3 A84T + Tet vs. MAP2K3 WT + Tet
PROBEID	SYMBOL	GENENAME	logFC	AveExpr	t	P.Value	adj.P.Val	B
AFFX-r2-Bs-lys-3_st	NA	NA	-6.43589702934448	13.2563658623163	-94.3327815649016	3.75283119544123e-24	9.66616731009797e-20	40.3061104424631
[truncated: 25,756 more rows]

## Sheet: E - MAP2K3_Gene_Enrichment
Type	source	term_name	negative_log10_of_adjusted_p_value	term_size	intersection_size	intersections
[truncated: 121 more rows]

[truncated: 4 more sheets: F - CHEK2_Cell_Counts, G - CHEK2_Normalized, H - Mitotracker, I - Experiment Overview]
