# Supplementary material for: Discriminating activating, deactivating and resistance variants in protein kinases
Source: Research Square preprint supplement (doi:10.21203/rs.3.rs-5001235/v1), 2024-09-30
Supplement: Supplementary file 2 [file 50e34aeb6559f4e02648ffe9.xlsx]

## Sheet: A Training variant set
Table S1A: Known functional variants in human kinases (training set)
A dash ("-") in PfamPos denotes variants not inside the region included the catalytic domain we are considering
UniProtAcc	GeneSymbol	Variant	WildType	Position	Mutation	PfamPos	GeneticType	FunctionalType	Source	Information	PubMed
Q2M2I8	AAK1	K74A	K	74	A	96	experimental	loss	UniProt	MUTAGEN K->A: Inhibits autophosphorylation and phosphorylation of AP2M1. Does not affect NUMB localization. Does not interact with monoubiquitinated NOTCH1.	12952931,18657069,21464124
Q2M2I8	AAK1	D176A	D	176	A	426	experimental	loss	UniProt	MUTAGEN D->A: Inhibits autophosphorylation and phosphorylation of AP2M1. Does not affect NUMB localization.	12952931,18657069
Q2M2I8	AAK1	V603A	V	603	A	-	germline	neutral	gnomAD	AF=2.38331e-02, allele-count=5930, n-homozygotes=103	32461654
Q2M2I8	AAK1	T694M	T	694	M	-	germline	neutral	gnomAD	AF=5.41762e-03, allele-count=1335, n-homozygotes=11	32461654
Q2M2I8	AAK1	P771R	P	771	R	-	germline	neutral	gnomAD	AF=2.50201e-03, allele-count=411, n-homozygotes=2	32461654
Q6ZMQ8	AATK	T118M	T	118	M	21	germline	neutral	gnomAD	AF=3.55450e-02, allele-count=5174, n-homozygotes=208	32461654
Q6ZMQ8	AATK	P1192S	P	1192	S	-	germline	neutral	gnomAD	AF=9.94374e-03, allele-count=2358, n-homozygotes=20	32461654
Q6ZMQ8	AATK	F1266S	F	1266	S	-	germline	neutral	gnomAD	AF=3.90747e-01, allele-count=28276, n-homozygotes=5775	32461654
Q6ZMQ8	AATK	A1332T	A	1332	T	-	germline	neutral	gnomAD	AF=1.06999e-02, allele-count=1470, n-homozygotes=13	32461654
P00519	ABL1	A337T	A	337	T	366	germline	increase	UniProt	VARIANT A -> T (in CHDSKM; increases kinase activity; no effect on protein levels; dbSNP:rs1060499548)	28288113
P00519	ABL1	Y226C	Y	226	C	15	germline	increase	UniProt	VARIANT Y -> C (in CHDSKM; increases kinase activity; no effect on protein levels; dbSNP:rs1060499547)	28288113
P00519	ABL1	S972L	S	972	L	-	germline	neutral	gnomAD	AF=2.10205e-02, allele-count=5260, n-homozygotes=93	32461654
P00519	ABL1	P810L	P	810	L	-	germline	neutral	gnomAD	AF=5.37994e-03, allele-count=1318, n-homozygotes=4	32461654
P00519	ABL1	K247R	K	247	R	36	germline	neutral	gnomAD	AF=2.58446e-03, allele-count=649, n-homozygotes=2	32461654
P00519	ABL1	T315I	T	315	I	233	somatic	resistance	COSMIC	-	-
P00519	ABL1	G250E	G	250	E	39	somatic	resistance	COSMIC	-	-
P00519	ABL1	Y253H	Y	253	H	42	somatic	resistance	COSMIC	-	-
P00519	ABL1	E255K	E	255	K	44	somatic	resistance	COSMIC	-	-
P00519	ABL1	F317L	F	317	L	235	somatic	resistance	COSMIC	-	-
P00519	ABL1	D276G	D	276	G	111	somatic	resistance	COSMIC	-	-
P00519	ABL1	F311I	F	311	I	227	somatic	resistance	COSMIC	-	-
P42684	ABL2	K930R	K	930	R	-	germline	neutral	gnomAD	AF=8.88369e-03, allele-count=2234, n-homozygotes=17	32461654
P42684	ABL2	P996R	P	996	R	-	germline	neutral	gnomAD	AF=3.07012e-03, allele-count=772, n-homozygotes=4	32461654
P42684	ABL2	T769S	T	769	S	-	germline	neutral	gnomAD	AF=3.28105e-03, allele-count=825, n-homozygotes=2	32461654
Q12979	ABR	V859A	V	859	A	-	experimental	decrease	UniProt	MUTAGEN V->A: Abolishes interaction with DLG4. No effect on synaptic localization.	20962234
Q12979	ABR	K517R	K	517	R	-	germline	neutral	gnomAD	AF=4.48430e-02, allele-count=11273, n-homozygotes=355	32461654
Q04771	ACVR1	Q207D	Q	207	D	29	experimental	increase	UniProt+PubMed	MUTAGEN Q->D: Strong induction of SMAD1 phosphorylation.	9748228
Q04771	ACVR1	Q207E	Q	207	E	29	germline	activating	PubMed	VARIANT constitutively-active	24852373
Q04771	ACVR1	A15G	A	15	G	-	germline	neutral	gnomAD	AF=1.03883e-02, allele-count=2610, n-homozygotes=50	32461654
Q04771	ACVR1	R206H	R	206	H	28	somatic/germline	activating	PubMed	VARIANT constitutively-active	35442931,29128351,25722188,23861958,24705252,24852373,20463014,22408652,22579779,16642017
P36896	ACVR1B	T206V	T	206	V	27	experimental	activating	UniProt	MUTAGEN T->V: Leads to constitutive activation.	8622651
P36896	ACVR1B	I70A	I	70	A	-	experimental	decrease	UniProt	MUTAGEN I->A: Decreases binding to activin.	12665502
P36896	ACVR1B	L75A	L	75	A	-	experimental	decrease	UniProt	MUTAGEN L->A: Decreases binding to activin.	12665502
P36896	ACVR1B	P77A	P	77	A	-	experimental	decrease	UniProt	MUTAGEN P->A: Decreases binding to activin.	12665502
Q8NER5	ACVR1C	K222R	K	222	R	96	experimental	loss	UniProt	MUTAGEN K->R: Loss of response to NODAL and SMAD2 phosphorylation.	12063393,15531507
Q8NER5	ACVR1C	I482V	I	482	V	852	germline	neutral	gnomAD	AF=8.28839e-02, allele-count=19211, n-homozygotes=1684	32461654
P37023	ACVRL1	C41G	C	41	G	-	germline	loss	UniProt	VARIANT C -> G (in HHT2; loss of receptor activity in response to BMP9; predominantly retained in the endoplasmic reticulum)	26176610
P37023	ACVRL1	C41Y	C	41	Y	-	germline	loss	UniProt	VARIANT C -> Y (in HHT2; loss of receptor activity in response to BMP9; predominantly retained in the endoplasmic reticulum; dbSNP:rs1184716348)	26176610
P37023	ACVRL1	C46G	C	46	G	-	germline	loss	UniProt	VARIANT C -> G (in HHT2; loss of receptor activity in response to BMP9; retained in the endoplasmic reticulum)	26176610
P37023	ACVRL1	R47P	R	47	P	-	germline	loss	UniProt	VARIANT R -> P (in HHT2; loss of receptor activity in response to BMP9; retained in the endoplasmic reticulum; dbSNP:rs774389618)	26176610
P37023	ACVRL1	H66Y	H	66	Y	-	germline	loss	UniProt	VARIANT H -> Y (in HHT2; loss of receptor activity in response to BMP9; retained in the endoplasmic reticulum; dbSNP:rs1480110873)	26176610
P37023	ACVRL1	C77F	C	77	F	-	germline	loss	UniProt	VARIANT C -> F (in HHT2; loss of receptor activity in response to BMP9; retained in the endoplasmic reticulum; dbSNP:rs1330837892)	26176610
P37023	ACVRL1	G211D	G	211	D	40	germline	loss	UniProt	VARIANT G -> D (in HHT2; loss of receptor activity in response to BMP9; retained in the endoplasmic reticulum; dbSNP:rs28936687)	14684682,26176610
P37023	ACVRL1	G211S	G	211	S	40	germline	loss	UniProt	VARIANT G -> S (in HHT2; loss of receptor activity in response to BMP9; retained in the endoplasmic reticulum)	26176610
P37023	ACVRL1	A306P	A	306	P	381	germline	loss	UniProt	VARIANT A -> P (in HHT2; loss of receptor activity in response to BMP9; retained in the endoplasmic reticulum; dbSNP:rs1940807179)	15024723,26176610
P37023	ACVRL1	L313V	L	313	V	391	germline	loss	UniProt	VARIANT L -> V (in HHT2; loss of receptor activity in response to BMP9; predominantly retained in the endoplasmic reticulum)	26176610
P37023	ACVRL1	H314Y	H	314	Y	393	germline	loss	UniProt	VARIANT H -> Y (in HHT2; loss of receptor activity in response to BMP9; retained in the endoplasmic reticulum; dbSNP:rs1565594311)	15024723,26176610
P37023	ACVRL1	P378S	P	378	S	543	germline	loss	UniProt	VARIANT P -> S (in HHT2; loss of receptor activity in response to BMP9; retained in the endoplasmic reticulum; dbSNP:rs959973779)	20414677,26176610
P37023	ACVRL1	E379D	E	379	D	544	germline	loss	UniProt	VARIANT E -> D (in HHT2; loss of receptor activity in response to BMP9; retained in the endoplasmic reticulum)	26176610
P37023	ACVRL1	E379K	E	379	K	544	germline	loss	UniProt	VARIANT E -> K (in HHT2; loss of receptor activity in response to BMP9; retained in the endoplasmic reticulum; dbSNP:rs1131691686)	15024723,15712270,26176610
P37023	ACVRL1	V404G	V	404	G	594	germline	loss	UniProt	VARIANT V -> G (in HHT2; loss of receptor activity in response to BMP9; predominantly retained in the endoplasmic reticulum)	26176610
P37023	ACVRL1	R411W	R	411	W	602	germline	loss	UniProt	VARIANT R -> W (in HHT2; loss of receptor activity in response to BMP9; predominantly retained in the endoplasmic reticulum; dbSNP:rs121909287)	11484689,15024723,15712270,26176610
Q7Z695	ADCK2	S307P	S	307	P	-	germline	neutral	gnomAD	AF=1.73912e-01, allele-count=42998, n-homozygotes=6148	32461654
Q7Z695	ADCK2	V418M	V	418	M	-	germline	neutral	gnomAD	AF=2.90695e-03, allele-count=731, n-homozygotes=10	32461654
Q7Z695	ADCK2	P622L	P	622	L	-	germline	neutral	gnomAD	AF=1.03170e-01, allele-count=25827, n-homozygotes=1693	32461654
Q7Z695	ADCK2	V418L	V	418	L	-	germline	neutral	gnomAD	AF=2.90695e-03, allele-count=731, n-homozygotes=10	32461654
Q7Z695	ADCK2	P626L	P	626	L	-	germline	neutral	gnomAD	AF=2.62013e-03, allele-count=653, n-homozygotes=9	32461654
Q7Z695	ADCK2	S66G	S	66	G	-	germline	neutral	gnomAD	AF=1.72993e-01, allele-count=40271, n-homozygotes=5702	32461654
Q3MIX3	ADCK5	S17R	S	17	R	-	germline	neutral	gnomAD	AF=0.485203, allele-count=126500, n-homozygotes=34144	32461654
P31749	AKT1	S473D	S	473	D	-	experimental	activating	PubMed+PubMed	VARIANT constitutively-active	35115496,34178653,32371868,20489726
P31749	AKT1	T308D	T	308	D	529	experimental	activating	PubMed+PubMed	VARIANT constitutively-active	15845389,16036218
P31749	AKT1	K14Q	K	14	Q	-	experimental	decrease	UniProt	MUTAGEN K->Q: Substantial reduction of phosphorylation at T-308 and S-473, loss of AKT activation, and loss of binding to PIP3 as well as IGF1-induced membrane recruitment.	12176338,19713527,21775285
P31749	AKT1	R25C	R	25	C	-	experimental	decrease	UniProt	VARIANT R->A,C: Impairs interaction with PtdIns(3,4,5)P3 and PtdIns(3,4)P2.	12176338
P31749	AKT1	K14A	K	14	A	-	experimental	decrease	UniProt	MUTAGEN K->A: Impairs interaction with PtdIns(3,4,5)P3 and PtdIns(3,4)P2.	12176338,19713527,21775285
P31749	AKT1	K14R	K	14	R	-	experimental	decrease	UniProt	MUTAGEN K->R: Substantial reduction of ubiquitination, phosphorylation at T-308 and S-473, AKT activation, loss of binding to PIP3 as well as IGF1-induced membrane recruitment.	12176338,19713527,21775285
P31749	AKT1	R25A	R	25	A	-	experimental	decrease	UniProt	MUTAGEN R->A,C: Impairs interaction with PtdIns(3,4,5)P3 and PtdIns(3,4)P2.	12176338
P31749	AKT1	R86A	R	86	A	-	experimental	decrease	UniProt	MUTAGEN R->A: Impairs interaction with PtdIns(3,4,5)P3 and PtdIns(3,4)P2.	12176338
P31749	AKT1	Y176F	Y	176	F	92	experimental	decrease	UniProt	MUTAGEN Y->F: Significant loss of interaction with TNK2. Loss of membrane localization. Significant reduction in phosphorylation on Ser-473.	20333297
P31749	AKT1	Y474F	Y	474	F	-	experimental	decrease	UniProt	MUTAGEN Y->F: 55% inhibition of activation.	12149249
P31749	AKT1	K20R	K	20	R	-	experimental	increase	UniProt	MUTAGEN K->R: Slight increase of phosphorylation at T-308 and S-473.	21775285
P31749	AKT1	T305A	T	305	A	526	experimental	increase	UniProt	MUTAGEN T->A: Reduces O-GlcNAc levels; Reduces O-GlcNAc levels even more; when associated with A-312.	22629392
P31749	AKT1	T312A	T	312	A	536	experimental	increase	UniProt	MUTAGEN T->A: Reduces O-GlcNAc levels; Reduces O-GlcNAc levels even more; when associated with A-305.	22629392
P31749	AKT1	K179M	K	179	M	96	experimental	loss	UniProt	MUTAGEN K->M: Abolished serine/threonine-protein kinase activity.	33594058
P31749	AKT1	T305Y	T	305	Y	526	experimental	loss	UniProt	MUTAGEN T->Y: Abolishes phosphorylation at Thr-308.	22629392
P31749	AKT1	T312Y	T	312	Y	536	experimental	loss	UniProt	MUTAGEN T->Y: Abolishes phosphorylation at Thr-308.	22629392
P31749	AKT1	E17K	E	17	K	-	somatic	increase	UniProt+PubMed	VARIANT E->K: No effect on membrane localization. Loss of membrane localization; when associated with Q-20.	21775285
P31751	AKT2	E17K	E	17	K	-	germline	activating	UniProt	VARIANT E -> K (in HIHGHH; exhibits plasma membrane localization in serum-starved cells and produced inappropriate tonic nuclear exclusion of FOXO1 in preadipocytes; dbSNP:rs387906659)	21979934
P31751	AKT2	R274H	R	274	H	424	germline	increase	UniProt	VARIANT R -> H (in T2D; associated with typical metabolic dyslipidemia with elevated fastin triglyceride, high VLDL triglyceride/cholesterol ratios, low HDL cholesterol levels and high small dense LDL levels; de novo lipogenesis and liver fat are also significantly elevated in this subject; dbSNP:rs121434593)	15166380,19164855
Q9Y243	AKT3	S472A	S	472	A	-	experimental	decrease	UniProt	MUTAGEN S->A: 67% decrease of activity after pervanadate treatment.	10092583
Q9Y243	AKT3	T305D	T	305	D	529	experimental	increase	UniProt	MUTAGEN T->D: 2-fold increase of phosphorylation steady state level, no activation after pervanadate treatment.	11387345
Q9Y243	AKT3	S472D	S	472	D	-	experimental	increase	UniProt	MUTAGEN S->D: 1.4-fold increase of phosphorylation steady state level, 50% decrease of activity after pervanadate treatment.	10092583
Q9Y243	AKT3	E17K	E	17	K	-	germline	activating	UniProt	VARIANT E -> K (in MPPH2 and melanoma; results in activation of AKT; dbSNP:rs397514606)	18813315,22500628,22729223
Q9UM73	ALK	R1275Q	R	1275	Q	485	germline	activating	UniProt	VARIANT R -> Q (in NBLST3; constitutively activated; retained in the endoplasmic reticulum and Golgi compartments; dbSNP:rs113994087)	18724359,18923523,18923525,21242967,22932897
Q9UM73	ALK	I1461V	I	1461	V	-	germline	neutral	gnomAD	AF=0.00244599999999995, allele-count=249995, n-homozygotes=124701	32461654
Q9UM73	ALK	K1491R	K	1491	R	-	germline	neutral	gnomAD	AF=3.43650e-01, allele-count=86397, n-homozygotes=19009	32461654
Q9UM73	ALK	D1529E	D	1529	E	-	germline	neutral	gnomAD	AF=4.68493e-01, allele-count=117649, n-homozygotes=30306	32461654
Q9UM73	ALK	V476A	V	476	A	-	germline	neutral	gnomAD	AF=2.85263e-02, allele-count=7167, n-homozygotes=133	32461654
Q9UM73	ALK	L1196M	L	1196	M	233	somatic	resistance	COSMIC	-	-
Q9UM73	ALK	G1202R	G	1202	R	240	somatic	resistance	COSMIC	-	-
Q9UM73	ALK	I1171N	I	1171	N	154	somatic	resistance	COSMIC	-	-
Q9UM73	ALK	F1174L	F	1174	L	159	somatic	resistance	COSMIC	-	-
Q9UM73	ALK	C1156Y	C	1156	Y	114	somatic	resistance	COSMIC	-	-
Q9UM73	ALK	F1174V	F	1174	V	159	somatic	resistance	COSMIC	-	-
Q9UM73	ALK	S1206F	S	1206	F	251	somatic	resistance	COSMIC	-	-
Q9UM73	ALK	F1174L	F	1174	L	159	somatic/tumor-predisposition	activating	UniProt	VARIANT F -> L (in NBLST3; somatic mutation; constitutively activated; retained in the endoplasmic reticulum and Golgi compartments; dbSNP:rs863225281)	18923523,18923525,21242967
Q9UM73	ALK	F1174V	F	1174	V	159	somatic/tumor-predisposition	activating	UniProt	VARIANT F -> V (in NBLST3; somatic mutation; constitutively activated; retained in the endoplasmic reticulum and Golgi compartments; dbSNP:rs281864719)	18923523,21242967
Q96QP1	ALPK1	K1067M	K	1067	M	-	experimental	loss	UniProt	MUTAGEN K->M: Abolishes the serine/threonine-protein kinase and ability to initiate the innate immune response.	30111836
Q96QP1	ALPK1	N175D	N	175	D	-	germline	neutral	gnomAD	AF=7.69148e-02, allele-count=19311, n-homozygotes=968	32461654
Q96QP1	ALPK1	G565D	G	565	D	-	germline	neutral	gnomAD	AF=0.384118, allele-count=154781, n-homozygotes=48143	32461654
Q96QP1	ALPK1	H642R	H	642	R	-	germline	neutral	gnomAD	AF=0.355099, allele-count=161990, n-homozygotes=52804	32461654
Q96QP1	ALPK1	M732I	M	732	I	-	germline	neutral	gnomAD	AF=0.383832, allele-count=154806, n-homozygotes=48161	32461654
Q96QP1	ALPK1	M861T	M	861	T	-	germline	neutral	gnomAD	AF=0.35503, allele-count=161810, n-homozygotes=52722	32461654
Q96QP1	ALPK1	N916D	N	916	D	-	germline	neutral	gnomAD	AF=8.45205e-03, allele-count=2124, n-homozygotes=48	32461654
Q96QP1	ALPK1	Q67R	Q	67	R	-	germline	neutral	gnomAD	AF=5.44395e-03, allele-count=1369, n-homozygotes=2	32461654
Q96QP1	ALPK1	K383E	K	383	E	-	germline	neutral	gnomAD	AF=2.41617e-03, allele-count=607, n-homozygotes=7	32461654
Q96QP1	ALPK1	P660L	P	660	L	-	germline	neutral	gnomAD	AF=1.61937e-03, allele-count=407, n-homozygotes=6	32461654
Q96QP1	ALPK1	G681D	G	681	D	-	germline	neutral	gnomAD	AF=9.94740e-03, allele-count=2500, n-homozygotes=23	32461654
Q96QP1	ALPK1	R873I	R	873	I	-	germline	neutral	gnomAD	AF=5.89725e-03, allele-count=1481, n-homozygotes=7	32461654
Q96QP1	ALPK1	E910D	E	910	D	-	germline	neutral	gnomAD	AF=8.44172e-03, allele-count=2121, n-homozygotes=48	32461654
Q96QP1	ALPK1	R1084Q	R	1084	Q	-	germline	neutral	gnomAD	AF=9.79533e-03, allele-count=2460, n-homozygotes=18	32461654
Q86TB3	ALPK2	L1296V	L	1296	V	-	germline	neutral	gnomAD	AF=0.252315, allele-count=187512, n-homozygotes=70859	32461654
Q86TB3	ALPK2	K2T	K	2	T	-	germline	neutral	gnomAD	AF=0.13864, allele-count=189084, n-homozygotes=82080	32461654
Q86TB3	ALPK2	R136S	R	136	S	-	germline	neutral	gnomAD	AF=0.498982, allele-count=125037, n-homozygotes=31879	32461654
Q86TB3	ALPK2	H719Q	H	719	Q	-	germline	neutral	gnomAD	AF=4.65875e-01, allele-count=117122, n-homozygotes=28842	32461654
Q86TB3	ALPK2	G810S	G	810	S	-	germline	neutral	gnomAD	AF=4.65099e-01, allele-count=116670, n-homozygotes=28679	32461654
Q86TB3	ALPK2	R825T	R	825	T	-	germline	neutral	gnomAD	AF=4.64800e-01, allele-count=116332, n-homozygotes=28606	32461654
Q86TB3	ALPK2	K829N	K	829	N	-	germline	neutral	gnomAD	AF=4.64829e-01, allele-count=116382, n-homozygotes=28610	32461654
Q86TB3	ALPK2	S884L	S	884	L	-	germline	neutral	gnomAD	AF=2.65628e-02, allele-count=6667, n-homozygotes=182	32461654
Q86TB3	ALPK2	T891I	T	891	I	-	germline	neutral	gnomAD	AF=0.122009, allele-count=220244, n-homozygotes=97557	32461654
Q86TB3	ALPK2	N916K	N	916	K	-	germline	neutral	gnomAD	AF=4.65589e-01, allele-count=116590, n-homozygotes=28667	32461654
Q86TB3	ALPK2	L1057V	L	1057	V	-	germline	neutral	gnomAD	AF=0.252315, allele-count=187512, n-homozygotes=70859	32461654
Q86TB3	ALPK2	H1174P	H	1174	P	-	germline	neutral	gnomAD	AF=0.252799, allele-count=187386, n-homozygotes=70758	32461654
Q86TB3	ALPK2	P1449S	P	1449	S	-	germline	neutral	gnomAD	AF=4.23898e-01, allele-count=106379, n-homozygotes=24109	32461654
Q86TB3	ALPK2	Q1579R	Q	1579	R	-	germline	neutral	gnomAD	AF=1.01149e-01, allele-count=25393, n-homozygotes=1624	32461654
Q86TB3	ALPK2	K1730E	K	1730	E	-	germline	neutral	gnomAD	AF=2.76719e-02, allele-count=6956, n-homozygotes=201	32461654
Q86TB3	ALPK2	I2157V	I	2157	V	-	germline	neutral	gnomAD	AF=0.131788, allele-count=218192, n-homozygotes=95300	32461654
Q86TB3	ALPK2	R1884C	R	1884	C	-	germline	neutral	gnomAD	AF=3.43161e-02, allele-count=8622, n-homozygotes=233	32461654
Q86TB3	ALPK2	G1063V	G	1063	V	-	germline	neutral	gnomAD	AF=2.92628e-03, allele-count=734, n-homozygotes=10	32461654
Q86TB3	ALPK2	A202T	A	202	T	-	germline	neutral	gnomAD	AF=9.53336e-03, allele-count=2385, n-homozygotes=49	32461654
Q86TB3	ALPK2	T397I	T	397	I	-	germline	neutral	gnomAD	AF=2.19852e-02, allele-count=5516, n-homozygotes=76	32461654
Q86TB3	ALPK2	T875P	T	875	P	-	germline	neutral	gnomAD	AF=1.48543e-02, allele-count=3726, n-homozygotes=43	32461654
Q96L96	ALPK3	T414S	T	414	S	-	germline	neutral	gnomAD	AF=2.18335e-01, allele-count=54633, n-homozygotes=6739	32461654
Q96L96	ALPK3	G579E	G	579	E	-	germline	neutral	gnomAD	AF=2.19068e-01, allele-count=54551, n-homozygotes=6738	32461654
Q96L96	ALPK3	T761M	T	761	M	-	germline	neutral	gnomAD	AF=6.58303e-03, allele-count=1592, n-homozygotes=42	32461654
Q96L96	ALPK3	P1299L	P	1299	L	-	germline	neutral	gnomAD	AF=0.242194, allele-count=157654, n-homozygotes=59717	32461654
Q96L96	ALPK3	L1622P	L	1622	P	-	germline	neutral	gnomAD	AF=2.29432e-01, allele-count=57588, n-homozygotes=7202	32461654
Q96L96	ALPK3	R336H	R	336	H	-	germline	neutral	gnomAD	AF=1.09337e-02, allele-count=2624, n-homozygotes=19	32461654
Q96L96	ALPK3	Q602R	Q	602	R	-	germline	neutral	gnomAD	AF=2.11510e-02, allele-count=5257, n-homozygotes=84	32461654
Q96L96	ALPK3	G663D	G	663	D	-	germline	neutral	gnomAD	AF=1.10226e-03, allele-count=244, n-homozygotes=2	32461654
Q96L96	ALPK3	R1412W	R	1412	W	-	germline	neutral	gnomAD	AF=1.16961e-02, allele-count=1838, n-homozygotes=29	32461654
Q96L96	ALPK3	A1557D	A	1557	D	-	germline	neutral	gnomAD	AF=1.64712e-02, allele-count=4138, n-homozygotes=50	32461654
Q96L96	ALPK3	E1013K	E	1013	K	-	germline	neutral	gnomAD	AF=4.86675e-03, allele-count=1221, n-homozygotes=33	32461654
Q96L96	ALPK3	A1873V	A	1873	V	-	germline	neutral	gnomAD	AF=3.47623e-03, allele-count=873, n-homozygotes=3	32461654
Q8NFD2	ANKK1	E713K	E	713	K	-	germline	neutral	gnomAD	AF=2.64189e-01, allele-count=65225, n-homozygotes=9971	32461654
Q8NFD2	ANKK1	A239T	A	239	T	660	germline	neutral	gnomAD	AF=2.53496e-01, allele-count=63155, n-homozygotes=9602	32461654
Q8NFD2	ANKK1	G442R	G	442	R	-	germline	neutral	gnomAD	AF=2.04031e-03, allele-count=465, n-homozygotes=2	32461654
Q8NFD2	ANKK1	H490R	H	490	R	-	germline	neutral	gnomAD	AF=3.87428e-01, allele-count=85778, n-homozygotes=19003	32461654
Q8NFD2	ANKK1	P276L	P	276	L	833	germline	neutral	gnomAD	AF=1.40126e-03, allele-count=349, n-homozygotes=3	32461654
Q8NFD2	ANKK1	H367Q	H	367	Q	-	germline	neutral	gnomAD	AF=2.09645e-02, allele-count=4821, n-homozygotes=60	32461654
Q8NFD2	ANKK1	S670G	S	670	G	-	germline	neutral	gnomAD	AF=1.03849e-02, allele-count=2585, n-homozygotes=102	32461654
Q13315	ATM	S1981D	S	1981	D	-	experimental	activating	UniProt	MUTAGEN S->D,E: Disrupts the dimer.	12556884,16858402
Q13315	ATM	S1981E	S	1981	E	-	experimental	activating	UniProt	MUTAGEN S->D,E: Disrupts the dimer.	12556884,16858402
Q13315	ATM	K3016Q	K	3016	Q	-	experimental	activating	UniProt	MUTAGEN K->Q: Mimics acetylation, preventing dephosphorylation and subsequent ATM deactivation during the late stage of DNA damage response.	30944854
Q13315	ATM	K1807E	K	1807	E	-	experimental	decrease	UniProt	MUTAGEN K->E: Decreased phosphorylation of target proteins.	19431188
Q13315	ATM	V1941L	V	1941	L	-	experimental	decrease	UniProt	MUTAGEN V->L: Decreased phosphorylation of target proteins.	19431188
Q13315	ATM	E2039K	E	2039	K	-	experimental	decrease	UniProt	MUTAGEN E->K: Decreased phosphorylation of target proteins.	19431188
Q13315	ATM	D2708N	D	2708	N	-	experimental	decrease	UniProt	MUTAGEN D->N: Decreased phosphorylation of target proteins.	19431188
Q13315	ATM	Y2019C	Y	2019	C	-	experimental	loss	UniProt	MUTAGEN Y->C: Loss of phosphorylation of target proteins.	19431188
Q13315	ATM	L2338P	L	2338	P	-	experimental	loss	UniProt	MUTAGEN L->P: Loss of phosphorylation of target proteins.	19431188
Q13315	ATM	S2394L	S	2394	L	-	experimental	loss	UniProt	MUTAGEN S->L: Loss of phosphorylation of target proteins.	19431188
Q13315	ATM	L2452P	L	2452	P	-	experimental	loss	UniProt	MUTAGEN L->P: Loss of phosphorylation of target proteins.	19431188
Q13315	ATM	P2699L	P	2699	L	-	experimental	loss	UniProt	MUTAGEN P->L: Loss of phosphorylation of target proteins.	19431188
Q13315	ATM	Q2730P	Q	2730	P	-	experimental	loss	UniProt	MUTAGEN Q->P: Loss of phosphorylation of target proteins.	19431188
Q13315	ATM	D2870A	D	2870	A	-	experimental	loss	UniProt	MUTAGEN D->A: Loss of kinase activity.	9733515
Q13315	ATM	N2875K	N	2875	K	-	experimental	loss	UniProt	MUTAGEN N->K: Loss of kinase activity.	9733515
Q13315	ATM	K3016R	K	3016	R	-	experimental	loss	UniProt	MUTAGEN K->R: Loss of DNA damage-inducible acetylation. Retains constitutive kinase activity, but blocks DNA damage-induced kinase activation. Disrupts dimer and abolishes S-1981 autophosphorylation.	17923702
Q13315	ATM	R3047Q	R	3047	Q	-	experimental	loss	UniProt	MUTAGEN R->Q: Abolished interaction with PEX5 and translocation to peroxisomes in response to reactive oxygen species (ROS).	26344566
Q13315	ATM	S367A	S	367	A	-	experimental	loss	UniProt	MUTAGEN S->A: Loss of IR-induced S-367 autophosphorylation. Reduced correction of cell cycle checkpoint defects and DNA-repair activity. No effect on S-1893 nor S-1981 autophosphorylation.	16858402
Q13315	ATM	S1893A	S	1893	A	-	experimental	loss	UniProt	MUTAGEN S->A: Loss of IR-induced S-1893 autophosphorylation. Reduced correction of cell cycle checkpoint defects and DNA-repair activity. No effect on S-367 nor S-1981 autophosphorylation.	16858402
Q13315	ATM	S1981A	S	1981	A	-	experimental	loss	UniProt	MUTAGEN S->A: Loss of IR-induced S-1981 autophosphorylation. Reduced correction of cell cycle checkpoint defects and DNA-repair activity. No effect on S-367 nor S-1893 autophosphorylation. No dimer disruption.	12556884,16858402
Q13315	ATM	L1465P	L	1465	P	-	germline	decrease	UniProt	VARIANT L -> P (in AT; decreased phosphorylation of target proteins; dbSNP:rs730881391)	10234507,19431188
Q13315	ATM	L2068S	L	2068	S	-	germline	decrease	UniProt	VARIANT L -> S (in AT; decreased protein abundance; loss of
Q13315	ATM	F2827C	F	2827	C	-	germline	decrease	UniProt	VARIANT F -> C (in AT; mild; decreased phosphorylation of target proteins; dbSNP:rs121434216)	19431188,8755918,9463314
Q13315	ATM	Y2080D	Y	2080	D	-	germline	loss	UniProt	VARIANT Y -> D (in AT; loss of DNA damage induced protein autophosphorylation; dbSNP:rs1064795467)	27664052
Q13315	ATM	H2554D	H	2554	D	-	germline	loss	UniProt	VARIANT H -> D (in AT; lack of phosphorylation of target proteins)	194,311,889,463,314
Q13315	ATM	D126E	D	126	E	-	germline	neutral	gnomAD	AF=1.61046e-02, allele-count=4046, n-homozygotes=342	32461654
Q13315	ATM	G514D	G	514	D	-	germline	neutral	gnomAD	AF=4.41192e-03, allele-count=1108, n-homozygotes=31	32461654
Q13315	ATM	S707P	S	707	P	-	germline	neutral	gnomAD	AF=7.95827e-03, allele-count=1991, n-homozygotes=11	32461654
Q13315	ATM	F858L	F	858	L	-	germline	neutral	gnomAD	AF=8.65017e-03, allele-count=2175, n-homozygotes=21	32461654
Q13315	ATM	M1040V	M	1040	V	-	germline	neutral	gnomAD	AF=3.07215e-03, allele-count=772, n-homozygotes=18	32461654
Q13315	ATM	L1420F	L	1420	F	-	germline	neutral	gnomAD	AF=1.10431e-02, allele-count=2715, n-homozygotes=18	32461654
Q13315	ATM	D1853N	D	1853	N	-	germline	neutral	gnomAD	AF=1.13623e-01, allele-count=28505, n-homozygotes=2083	32461654
Q13315	ATM	D1853V	D	1853	V	-	germline	neutral	gnomAD	AF=4.88462e-03, allele-count=1226, n-homozygotes=6	32461654
Q13315	ATM	V2079I	V	2079	I	-	germline	neutral	gnomAD	AF=2.52202e-03, allele-count=634, n-homozygotes=5	32461654
Q13315	ATM	V410A	V	410	A	-	germline	neutral	gnomAD	AF=2.22220e-03, allele-count=558, n-homozygotes=2	32461654
Q13315	ATM	L546V	L	546	V	-	germline	neutral	gnomAD	AF=3.88368e-03, allele-count=976, n-homozygotes=28	32461654
Q13315	ATM	P872S	P	872	S	-	germline	neutral	gnomAD	AF=3.53185e-03, allele-count=888, n-homozygotes=26	32461654
Q13315	ATM	H1380Y	H	1380	Y	-	germline	neutral	gnomAD	AF=1.23359e-02, allele-count=3100, n-homozygotes=88	32461654
Q13315	ATM	L2307F	L	2307	F	-	germline	neutral	gnomAD	AF=1.41240e-03, allele-count=355, n-homozygotes=2	32461654
Q13315	ATM	L2332P	L	2332	P	-	germline	neutral	gnomAD	AF=1.62128e-03, allele-count=407, n-homozygotes=7	32461654
Q13315	ATM	D814E	D	814	E	-	germline	neutral	gnomAD	AF=1.91162e-03, allele-count=480, n-homozygotes=8	32461654
Q13315	ATM	G2765S	G	2765	S	-	tumor-predisposition	loss	UniProt	VARIANT G -> S (may contribute to breast cancer; lack of phosphorylation of target proteins; dbSNP:rs748634900)	10534763,19431188
Q13315	ATM	R3008C	R	3008	C	-	somatic/germline	loss	UniProt	VARIANT R -> C (in AT; also found in T-prolymphocytic leukemia and mantle cell lymphoma; lack of phosphorylation of target proteins; dbSNP:rs587782292)	10706620,10817650,19431188,9334731,9488043,9872980
Q13535	ATR	K2327R	K	2327	R	-	experimental	loss	UniProt	MUTAGEN K->R: Abolishes kinase activity.	11114888,12011431,9925639
Q13535	ATR	D2475A	D	2475	A	-	experimental	loss	UniProt	MUTAGEN D->A: Abolishes kinase activity; increases sensitivity to IR and impairs translocation to nuclear foci upon DNA damage.	12814551,9427750,9925639
Q13535	ATR	D2494E	D	2494	E	-	experimental	loss	UniProt	MUTAGEN D->E: Abolishes kinase activity; reduces cell viability, augments sensitivity to IR and UV.	10597277,9636169
Q13535	ATR	H90Y	H	90	Y	-	germline	neutral	gnomAD	AF=8.46966e-03, allele-count=2130, n-homozygotes=56	32461654
Q13535	ATR	K297N	K	297	N	-	germline	neutral	gnomAD	AF=1.01440e-02, allele-count=2547, n-homozygotes=24	32461654
Q13535	ATR	V316I	V	316	I	-	germline	neutral	gnomAD	AF=1.81473e-02, allele-count=4559, n-homozygotes=83	32461654
Q13535	ATR	V959M	V	959	M	-	germline	neutral	gnomAD	AF=1.82405e-02, allele-count=4585, n-homozygotes=84	32461654
Q13535	ATR	N1612S	N	1612	S	-	germline	neutral	gnomAD	AF=3.27003e-03, allele-count=822, n-homozygotes=12	32461654
Q13535	ATR	R2425Q	R	2425	Q	-	germline	neutral	gnomAD	AF=1.30601e-01, allele-count=32811, n-homozygotes=2377	32461654
Q13535	ATR	P2434A	P	2434	A	-	germline	neutral	gnomAD	AF=3.21510e-03, allele-count=808, n-homozygotes=12	32461654
Q13535	ATR	M211T	M	211	T	-	germline	neutral	gnomAD	AF=0.451608, allele-count=135126, n-homozygotes=38025	32461654
O14965	AURKA	T287E	T	287	E	528	experimental	activating	UniProt	MUTAGEN T->E: Enhances interaction with TPX2.	19668197
O14965	AURKA	T288A	T	288	A	529	experimental	decrease	UniProt	MUTAGEN T->A: Reduces cilia disassembly and kinase activity.	17604723
O14965	AURKA	G198N	G	198	N	184	experimental	decrease	UniProt	MUTAGEN G->N: Reduces interaction with TPX2. Reduces kinase activity tenfold. Promotes interaction with the AURKB binding partners INCENP and BIRC5 that are normally not bound by AURKA.	19357306
O14965	AURKA	Y334A	Y	334	A	638	experimental	decrease	UniProt	MUTAGEN Y->A: Reduces binding to MYCN.	27837025
O14965	AURKA	Q335A	Q	335	A	639	experimental	decrease	UniProt	MUTAGEN Q->A: Reduces binding to MYCN.	27837025
O14965	AURKA	T288D	T	288	D	529	experimental	increase	UniProt	MUTAGEN T->D: Mimics phosphorylation state and increases kinase activity.	11039908
O14965	AURKA	K162R	K	162	R	96	experimental	loss	UniProt	MUTAGEN K->R: Loss of kinase activity.	14702041
O14965	AURKA	D274N	D	274	N	479	experimental	loss	UniProt	MUTAGEN D->N: Abolishes cilia disassembly and kinase activity.	14580337,17604723
O14965	AURKA	F31I	F	31	I	-	germline	neutral	gnomAD	AF=2.77553e-01, allele-count=69789, n-homozygotes=11713	32461654
O14965	AURKA	I57V	I	57	V	-	germline	neutral	gnomAD	AF=0.149177, allele-count=213970, n-homozygotes=91168	32461654
O14965	AURKA	P50L	P	50	L	-	germline	neutral	gnomAD	AF=1.07758e-03, allele-count=271, n-homozygotes=3	32461654
O14965	AURKA	M373V	M	373	V	834	germline	neutral	gnomAD	AF=1.87479e-02, allele-count=4714, n-homozygotes=75	32461654
O14965	AURKA	I57V	I	57	V	-	tumor-predisposition	increase	UniProt	VARIANT I -> V (increased kinase activity; dbSNP:rs1047972)	15489334,15867347,16011022,17344846,9153231,9514916,9771714
O14965	AURKA	V174M	V	174	M	122	somatic	activating	UniProt	VARIANT V -> M (in a metastatic melanoma sample; somatic mutation; constitutively enhanced kinase activity)	17344846,19801554
O14965	AURKA	S155R	S	155	R	79	somatic	decrease	UniProt	VARIANT S -> R (in a colorectal adenocarcinoma sample; somatic mutation; reduces interaction with TPX2)	17344846,19801554
Q96GD4	AURKB	K215Q	K	215	Q	476	experimental	activating	UniProt	MUTAGEN K->Q: Mimics acetylation, promoting accurate chromosome segregation.	26829474
Q96GD4	AURKB	K106R	K	106	R	96	experimental	loss	UniProt	MUTAGEN K->R: Leads to loss of kinase activity and severely impairs mitotic progression.	12686604,12925766,14722118,16179162
Q96GD4	AURKB	K215R	K	215	R	476	experimental	loss	UniProt	MUTAGEN K->R: Abolished acetylation by KAT5, leading to impaired chromosome segregation.	26829474
Q96GD4	AURKB	M298T	M	298	T	806	germline	neutral	gnomAD	AF=0.169618, allele-count=194904, n-homozygotes=81985	32461654
Q96GD4	AURKB	A52V	A	52	V	6	germline	neutral	gnomAD	AF=3.95041e-03, allele-count=993, n-homozygotes=14	32461654
Q9UQB9	AURKC	K72R	K	72	R	96	experimental	decrease	UniProt	MUTAGEN K->R: Impairs kinase activity.	15316025,15499654
Q9UQB9	AURKC	D166Y	D	166	Y	426	experimental	decrease	UniProt	MUTAGEN D->Y: Impairs kinase activity, and keeps AURKC with the chromosomes until the end of mitosis.	15938719
Q9UQB9	AURKC	T198A	T	198	A	529	experimental	decrease	UniProt	MUTAGEN T->A: Impairs kinase activity.	15316025,15670791
P30530	AXL	E63R	E	63	R	-	experimental	decrease	UniProt	MUTAGEN E->R: Slightly reduced affinity for GAS6.	16362042
P30530	AXL	E66R	E	66	R	-	experimental	decrease	UniProt	MUTAGEN E->R: Reduced affinity for GAS6.	16362042
P30530	AXL	T84R	T	84	R	-	experimental	decrease	UniProt	MUTAGEN T->R: Reduced affinity for GAS6.	16362042
P30530	AXL	K567M	K	567	M	96	experimental	loss	UniProt	MUTAGEN K->M: Catalytically inactive mutant.	28076778
Q9NRL2	BAZ1A	N1366K	N	1366	K	-	germline	neutral	gnomAD	AF=7.40121e-02, allele-count=18609, n-homozygotes=872	32461654
Q9UIG0	BAZ1B	C338A	C	338	A	-	experimental	loss	UniProt	MUTAGEN C->A: Loss of tyrosine-protein kinase activity.	19092802
O14874	BCKDK	R174G	R	174	G	-	germline	decrease	UniProt	VARIANT R -> G (in BCKDKD; partial loss of kinase activity)	24449431
O14874	BCKDK	L389P	L	389	P	-	germline	loss	UniProt	VARIANT L -> P (in BCKDKD; complete loss of kinase activity)	24449431
P11274	BCR	N796S	N	796	S	-	germline	neutral	gnomAD	AF=0.186069, allele-count=202358, n-homozygotes=83590	32461654
P11274	BCR	D752E	D	752	E	-	germline	neutral	gnomAD	AF=2.00601e-02, allele-count=5034, n-homozygotes=283	32461654
P11274	BCR	V949I	V	949	I	-	germline	neutral	gnomAD	AF=4.69698e-03, allele-count=1181, n-homozygotes=7	32461654
P51451	BLK	A71T	A	71	T	-	germline	neutral	gnomAD	AF=1.15608e-02, allele-count=2907, n-homozygotes=25	32461654
P51451	BLK	A71T	A	71	T	-	somatic	decrease	UniProt	VARIANT A -> T (associated with MODY11; reduces the enhancing effect of BLK on insulin secretion; reduces the inducing effect of BLK on the expression of PDX1 and NKX6-1; found as somatic mutation in a colorectal adenocarcinoma sample; dbSNP:rs55758736)	17344846,19667185
P53004	BLVRA	Q56R	Q	56	R	-	germline	neutral	gnomAD	AF=8.00598e-03, allele-count=2012, n-homozygotes=14	32461654
P53004	BLVRA	A3T	A	3	T	-	germline	neutral	gnomAD	AF=0.199356, allele-count=201314, n-homozygotes=81163	32461654
Q9NSY1	BMP2K	G405S	G	405	S	-	germline	neutral	gnomAD	AF=6.08794e-02, allele-count=15299, n-homozygotes=833	32461654
Q9NSY1	BMP2K	T1002S	T	1002	S	-	germline	neutral	gnomAD	AF=1.07532e-01, allele-count=26768, n-homozygotes=1844	32461654
Q9NSY1	BMP2K	Q486H	Q	486	H	-	germline	neutral	gnomAD	AF=1.31130e-02, allele-count=2670, n-homozygotes=8	32461654
P36894	BMPR1A	P2T	P	2	T	-	germline	neutral	gnomAD	AF=3.57539e-01, allele-count=89783, n-homozygotes=18858	32461654
O00238	BMPR1B	R31C	R	31	C	-	germline	decrease	UniProt	VARIANT R -> C (in AMD3; unknown pathological significance; mouse BMPR1B construct containing this mutation shows reduced GDF5-dependent receptor activation, mouse BMPR1B construct containing this mutation shows no loss of cell membrane localization; dbSNP:rs745854387)	26105076
O00238	BMPR1B	C53R	C	53	R	-	germline	loss	UniProt	VARIANT C -> R (in AMD3; mouse BMPR1B construct containing this mutation shows loss of GDF5-dependent receptor activation, chicken BMPR1B construct containing this mutation does not show reduced chondrocyte differentiation, mouse BMPR1B construct containing this mutation shows no loss of cell membrane localization; dbSNP:rs863225041)	24129431
O00238	BMPR1B	I200K	I	200	K	27	germline	loss	UniProt	VARIANT I -> K (in BDA2; in animal models loss of kinase activity and loss of positive regulation of chondrocyte differentiation; dbSNP:rs121434417)	14523231
Q13873	BMPR2	R899P	R	899	P	-	germline	activating	UniProt	VARIANT R -> P (in PPH1; leads to constitutive activation of the MAPK14 pathway; dbSNP:rs137852752)	15965979
Q13873	BMPR2	D485G	D	485	G	824	germline	loss	UniProt	VARIANT D -> G (in PPH1; complete loss of function; dbSNP:rs137852745)	10973254,11115378
Q13873	BMPR2	S775N	S	775	N	-	germline	neutral	gnomAD	AF=2.44441e-02, allele-count=6145, n-homozygotes=122	32461654
P51813	BMX	Y566F	Y	566	F	508	experimental	loss	UniProt	MUTAGEN Y->F: Abolishes almost completely the SRC-induced phosphorylation of BMX.	10688651
P15056	BRAF	K483S	K	483	S	96	experimental	decrease	UniProt	MUTAGEN K->S: Reduces kinase activity with MAP2K1.	21441910
P15056	BRAF	M53D	M	53	D	-	experimental	decrease	UniProt	MUTAGEN M->D: Reduces interaction with KSR1 and MAP2K1 and thus phosphorylation of MAP2K1.	29433126
P15056	BRAF	K88E	K	88	E	-	experimental	decrease	UniProt	MUTAGEN K->E: Reduces interaction with KSR1 and MAP2K1 and thus phosphorylation of MAP2K1.	29433126
P15056	BRAF	I666R	I	666	R	649	experimental	decrease	UniProt	MUTAGEN I->R: No effect on MAP2K1-mediated-BRAF-KSR1 dimerization, however loss of BRAF-mediated phosphorylation of MAP2K1.	29433126
P15056	BRAF	R671K	R	671	K	661	experimental	increase	UniProt	MUTAGEN R->K: Increased kinase activity and stability in response to EGF treatment.	21917714
P15056	BRAF	R509H	R	509	H	162	experimental	loss	UniProt	MUTAGEN R->H: Loss of MAP2K1-mediated-BRAF-KSR1 dimerization.	29433126
P15056	BRAF	K578R	K	578	R	428	experimental	loss	UniProt	MUTAGEN K->R: Blocks EGF-induced ubiquitination and ERK activation.	23907581
P15056	BRAF	V600E	V	600	E	491	somatic	activating	UniProt	VARIANT V -> E (in CRC; also found in sarcoma, metastatic melanoma, ovarian serous carcinoma, pilocytic astrocytoma; somatic mutation; most common mutation; constitutive and elevated kinase activity; efficiently induces cell transformation; suppression of mutation in melanoma causes growth arrest and promotes apoptosis; loss of regulation by PMRT5; dbSNP:rs113488022)	12068308,12198537,14500344,16959974,17344846,21917714,23263490,24455489
P15056	BRAF	V600F	V	600	F	491	somatic	activating	PubMed	VARIANT constitutively-active	25348715
P15056	BRAF	V600K	V	600	K	491	somatic	activating	PubMed	VARIANT constitutively-active	15035987,29533785
P15056	BRAF	V600E	V	600	E	491	somatic	resistance	COSMIC	-	-
P15056	BRAF	L505H	L	505	H	154	somatic	resistance	COSMIC	-	-
P15056	BRAF	G464V	G	464	V	38	somatic/tumor-predisposition	increase	UniProt	VARIANT G -> V (in a colorectal cancer cell line; elevated kinase activity; efficiently induces cell transformation; dbSNP:rs121913348)	12068308
P15056	BRAF	G469A	G	469	A	43	somatic/tumor-predisposition	increase	UniProt	VARIANT G -> A (in NHL; also in a lung adenocarcinoma sample; somatic mutation; elevated kinase activity; efficiently induces cell transformation; dbSNP:rs121913355)	12068308,14612909,17344846
P15056	BRAF	L597V	L	597	V	482	somatic/tumor-predisposition	increase	UniProt	VARIANT L -> V (in NS7; also in a lung adenocarcinoma sample; somatic mutation; elevated kinase activity; efficiently induces cell transformation; dbSNP:rs121913369)	12068308,17344846,19206169
P25440	BRD2	Q78A	Q	78	A	-	experimental	loss	UniProt	MUTAGEN Q->A: Loss of homodimerization.	17148447
P25440	BRD2	Y153K	Y	153	K	-	experimental	loss	UniProt	MUTAGEN Y->K: Loss of homodimerization.	17148447
P25440	BRD2	E170A	E	170	A	-	experimental	loss	UniProt	MUTAGEN E->A: Loss of homodimerization.	17148447
P25440	BRD2	L174E	L	174	E	-	experimental	loss	UniProt	MUTAGEN L->E: Loss of homodimerization.	17148447
P25440	BRD2	V177E	V	177	E	-	experimental	loss	UniProt	MUTAGEN V->E: Loss of homodimerization.	17148447
P25440	BRD2	L238F	L	238	F	-	germline	neutral	gnomAD	AF=5.26951e-03, allele-count=1301, n-homozygotes=13	32461654
P25440	BRD2	A474V	A	474	V	-	germline	neutral	gnomAD	AF=2.92529e-02, allele-count=7213, n-homozygotes=126	32461654
P25440	BRD2	A49S	A	49	S	-	germline	neutral	gnomAD	AF=1.70273e-02, allele-count=4282, n-homozygotes=59	32461654
P25440	BRD2	A569T	A	569	T	-	germline	neutral	gnomAD	AF=4.68169e-03, allele-count=1155, n-homozygotes=10	32461654
P25440	BRD2	A599P	A	599	P	-	germline	neutral	gnomAD	AF=3.93768e-03, allele-count=968, n-homozygotes=10	32461654
Q15059	BRD3	A172V	A	172	V	-	germline	neutral	gnomAD	AF=1.07912e-02, allele-count=2604, n-homozygotes=34	32461654
Q15059	BRD3	K435Q	K	435	Q	-	germline	neutral	gnomAD	AF=1.09601e-02, allele-count=2709, n-homozygotes=21	32461654
O60885	BRD4	S503A	S	503	A	-	experimental	decrease	UniProt	MUTAGEN S->A: Impaired phosphorylation by CK2 and binding to acetylated histones.	23317504
O60885	BRD4	R1097H	R	1097	H	-	germline	neutral	gnomAD	AF=1.16153e-02, allele-count=2897, n-homozygotes=36	32461654
Q58F21	BRDT	Q62K	Q	62	K	-	germline	neutral	gnomAD	AF=0.121513, allele-count=200165, n-homozygotes=89196	32461654
Q58F21	BRDT	K238N	K	238	N	-	germline	neutral	gnomAD	AF=1.08347e-01, allele-count=27176, n-homozygotes=2539	32461654
Q58F21	BRDT	N410K	N	410	K	-	germline	neutral	gnomAD	AF=2.11652e-01, allele-count=52982, n-homozygotes=6402	32461654
Q58F21	BRDT	P696L	P	696	L	-	germline	neutral	gnomAD	AF=0.186378, allele-count=158832, n-homozygotes=65473	32461654
Q8TDC3	BRSK1	T189E	T	189	E	529	experimental	activating	PubMed	VARIANT constitutively-active	22020259
Q8TDC3	BRSK1	K59A	K	59	A	91	experimental	loss	UniProt	MUTAGEN K->A: Loss of kinase activity.	15150265
Q8TDC3	BRSK1	G327A	G	327	A	-	experimental	loss	UniProt	MUTAGEN G->A: Abolishes activation of kinase activity.	18339622
Q8TDC3	BRSK1	T189A	T	189	A	529	experimental	loss	UniProt	MUTAGEN T->A: Prevents phosphorylation and activation by STK11/LKB1 complex.	14976552
Q8TDC3	BRSK1	P764A	P	764	A	-	germline	neutral	gnomAD	AF=4.41462e-03, allele-count=504, n-homozygotes=2	32461654
Q8IWQ3	BRSK2	T174E	T	174	E	529	experimental	activating	UniProt	MUTAGEN T->E: Constitutively activated.	14976552,18339622,22798068
Q8IWQ3	BRSK2	T443A	T	443	A	-	experimental	activating	UniProt	MUTAGEN T->A: Constitutively activated. Promotes formation of actin stress fibers.	22669945
Q8IWQ3	BRSK2	T260A	T	260	A	834	experimental	decrease	UniProt	MUTAGEN T->A: Decreased phosphorylation. Nearly abolishes stimulation of insulin secretion.	16870137,22669945
Q8IWQ3	BRSK2	G310A	G	310	A	-	experimental	decrease	UniProt	MUTAGEN G->A: Decreased activation of kinase activity.	18339622
Q8IWQ3	BRSK2	K48M	K	48	M	96	experimental	loss	UniProt	MUTAGEN K->M: Loss of catalytic activity. Causes disintegration of actin stress fibers.	22669945,22798068
Q8IWQ3	BRSK2	T174A	T	174	A	529	experimental	loss	UniProt	MUTAGEN T->A: Prevents phosphorylation and activation by STK11/LKB1 complex.	14976552,18339622,22798068
Q06187	BTK	Y617E	Y	617	E	677	experimental	decrease	UniProt	MUTAGEN Y->E: Defective in mediating calcium response.	15375214
Q06187	BTK	Y223F	Y	223	F	-	experimental	loss	UniProt	MUTAGEN Y->F: Loss of phosphorylation of GTF2I.	8630736,9012831
Q06187	BTK	R307K	R	307	K	-	experimental	loss	UniProt	MUTAGEN R->K: Loss of phosphorylation of GTF2I.	9012831
Q06187	BTK	Y551F	Y	551	F	508	experimental	loss	UniProt	MUTAGEN Y->F: Loss of phosphorylation of GTF2I.	9012831
Q06187	BTK	E41K	E	41	K	-	germline	activating	PubMed	VARIANT constitutively-active	32272741,20623551,9333013,9736610,10196129,10352268,11751885,12835482,16585544
Q06187	BTK	R525Q	R	525	Q	430	germline	decrease	UniProt	VARIANT R -> Q (in XLA; severe; disturbs ATP-binding; dbSNP:rs128620183)	78,091,249,445,504
Q06187	BTK	E589G	E	589	G	597	germline	decrease	UniProt	VARIANT E -> G (in XLA; moderate; interferes with substrate binding; dbSNP:rs128621206)	78,091,247,849,721
Q06187	BTK	G594E	G	594	E	604	germline	decrease	UniProt	VARIANT G -> E (in XLA; mild; interferes with substrate binding)	78,091,249,445,504
Q06187	BTK	G613D	G	613	D	662	germline	decrease	UniProt	VARIANT G -> D (in XLA; mild; interferes with substrate binding and/or domain interactions; dbSNP:rs128621209)	78,091,247,849,721
Q06187	BTK	R307G	R	307	G	-	germline	loss	UniProt	VARIANT R -> G (in XLA; loss of activity; dbSNP:rs128621195)	8162056
Q06187	BTK	K430E	K	430	E	96	germline	loss	UniProt	VARIANT K -> E (in XLA; loss of phosphorylation of GTF2I; dbSNP:rs128620184)	7809124
Q06187	BTK	R520Q	R	520	Q	424	germline	loss	UniProt	VARIANT R -> Q (in XLA; severe; prevents activation due to absence of contact between the catalytic loop and the regulatory phosphorylated residue; dbSNP:rs128621202)	7633429,7809124,7849697,7880320
Q06187	BTK	C481S	C	481	S	241	somatic	resistance	COSMIC	-	-
Q06187	BTK	C481Y	C	481	Y	241	somatic	resistance	COSMIC	-	-
Q06187	BTK	C481R	C	481	R	241	somatic	resistance	COSMIC	-	-
O43683	BUB1	K821A	K	821	A	107	experimental	loss	UniProt	MUTAGEN K->A: Loss of activity.	10198256
O60566	BUB1B	D579E	D	579	E	-	experimental	increase	UniProt	MUTAGEN D->E: Abolishes the cleavage by caspase-3.	16227576
O60566	BUB1B	D610E	D	610	E	-	experimental	increase	UniProt	MUTAGEN D->E: Abolishes the cleavage by caspase-3.	16227576
O60566	BUB1B	K795A	K	795	A	4	experimental	loss	UniProt	MUTAGEN K->A: Does not abolish the capacity to inhibit APC/CDC20.	11702782,12925705
O60566	BUB1B	K795R	K	795	R	4	experimental	loss	UniProt	MUTAGEN K->R: Inhibits kinase activity.	11702782,12925705
O60566	BUB1B	R349Q	R	349	Q	-	germline	neutral	gnomAD	AF=0.349882, allele-count=163454, n-homozygotes=55071	32461654
O60566	BUB1B	V618A	V	618	A	-	germline	neutral	gnomAD	AF=2.04398e-02, allele-count=5140, n-homozygotes=608	32461654
O60566	BUB1B	E390D	E	390	D	-	germline	neutral	gnomAD	AF=8.82758e-03, allele-count=2218, n-homozygotes=116	32461654
O60566	BUB1B	T40M	T	40	M	-	germline	neutral	gnomAD	AF=5.32423e-03, allele-count=1339, n-homozygotes=55	32461654
Q14012	CAMK1	T177D	T	177	D	529	experimental	increase	UniProt	MUTAGEN T->D: Partial activation in absence of CaMKK1.	7641687
Q14012	CAMK1	T177A	T	177	A	529	experimental	loss	UniProt	MUTAGEN T->A: Loss of activation by CaMKK1.	7641687
Q14012	CAMK1	K49A	K	49	A	96	experimental	loss	UniProt	MUTAGEN K->A: Catalytically inactive form; prevents CDK4 activation.	147,548,927,641,687
Q14012	CAMK1	E361K	E	361	K	-	germline	neutral	gnomAD	AF=1.08520e-03, allele-count=270, n-homozygotes=2	32461654
Q8IU85	CAMK1D	T180A	T	180	A	529	experimental	loss	UniProt	MUTAGEN T->A: Loss of ionomycin-induced activation.	12935886,16324104
Q8IU85	CAMK1D	K52A	K	52	A	96	experimental	loss	UniProt	MUTAGEN K->A: Catalytically inactive form.	16324104
Q8IU85	CAMK1D	I66M	I	66	M	146	germline	neutral	gnomAD	AF=7.43657e-03, allele-count=1870, n-homozygotes=14	32461654
Q96NX5	CAMK1G	V329I	V	329	I	-	germline	neutral	gnomAD	AF=1.86431e-01, allele-count=46864, n-homozygotes=4758	32461654
Q9UQM7	CAMK2A	F98S	F	98	S	250	germline	decrease	UniProt	VARIANT F -> S (in MRD53; no effect on protein abundance; decreased autophosphorylation; decreased neuronal migration; dbSNP:rs1554122526)	29100089
Q9UQM7	CAMK2A	E183V	E	183	V	544	germline	decrease	UniProt	VARIANT E -> V (in MRD53; increased ubiquitin-mediated proteasomal degradation with a dominant negative effect on wild-type protein; decreased localization to dendritic spines; no effect on holoenzyme assembly; loss of interaction with SHANK3; loss of interaction with GRIN2B; loss of interaction with CACNB2; loss of interaction with LRRC7; loss of interaction with GRM5; decreased protein serine/t…	28130356,29100089
Q9UQM7	CAMK2A	P212Q	P	212	Q	610	germline	increase	UniProt	VARIANT P -> Q (in MRD53; increased basal autophosphorylation)	29560374
Q9UQM7	CAMK2A	E109D	E	109	D	366	germline	increase	UniProt	VARIANT E -> D (in MRD53; no effect on protein abundance; increased autophosphorylation; decreased neuronal migration)	29100089
Q9UQM7	CAMK2A	H282R	H	282	R	863	germline	increase	UniProt	VARIANT H -> R (in MRD53; decreased protein abundance; increased autophosphorylation; decreased neuronal migration; dbSNP:rs1554121875)	29100089
Q13554	CAMK2B	E110K	E	110	K	366	germline	increase	UniProt	VARIANT E -> K (in MRD54; decreased protein abundance; increased autophosphorylation; decreased neuronal migration; dbSNP:rs1554402092)	29100089
Q13554	CAMK2B	P139L	P	139	L	429	germline	increase	UniProt	VARIANT P -> L (in MRD54; decreased protein abundance; increased autophosphorylation; decreased neuronal migration; dbSNP:rs1554389088)	29100089
Q13554	CAMK2B	E237K	E	237	K	697	germline	increase	UniProt	VARIANT E -> K (in MRD54; no effect on protein abundance; increased autophosphorylation; decreased neuronal migration; dbSNP:rs1554386687)	29100089
Q13554	CAMK2B	K301E	K	301	E	881	germline	loss	UniProt	VARIANT K -> E (in MRD54; no effect on protein abundance; loss of autophosphorylation; changed function in neuronal migration; dbSNP:rs1554385111)	29100089
Q13554	CAMK2B	E510K	E	510	K	-	germline	neutral	gnomAD	AF=7.52167e-02, allele-count=11125, n-homozygotes=580	32461654
Q13557	CAMK2D	D167E	D	167	E	503	germline	neutral	gnomAD	AF=4.62199e-03, allele-count=1160, n-homozygotes=4	32461654
Q13555	CAMK2G	R292P	R	292	P	872	germline	activating	UniProt+PubMed	VARIANT R -> P (in MRD59; gain-of-function variant affecting regulation of neurite formation and arborization; results in constitutive autophosphorylation; dbSNP:rs397514627)	23033978,30184290
Q16566	CAMK4	S189A	S	189	A	484	experimental	increase	UniProt	MUTAGEN S->A: Increases phosphorylation of CREB1 2-fold. Decreases total O-linked glycosylation 2-fold. Increases ATP-binding affinity.	19506079
Q16566	CAMK4	S12A	S	12	A	-	experimental	loss	UniProt	MUTAGEN S->A: Loss of activity.	8702940
Q16566	CAMK4	S13A	S	13	A	-	experimental	loss	UniProt	MUTAGEN S->A: Loss of activity.	8702940
Q16566	CAMK4	K75E	K	75	E	96	experimental	loss	UniProt	MUTAGEN K->E: Loss of activity; dominant negative form.	10617605
Q16566	CAMK4	T200A	T	200	A	529	experimental	loss	UniProt	MUTAGEN T->A: Loss of activation by CaMKK1 or CaMKK2.	8855261
Q16566	CAMK4	Q465R	Q	465	R	-	germline	neutral	gnomAD	AF=5.75914e-03, allele-count=1058, n-homozygotes=39	32461654
Q96RR4	CAMKK2	T85S	T	85	S	-	germline	neutral	gnomAD	AF=3.77342e-01, allele-count=91676, n-homozygotes=18251	32461654
Q96RR4	CAMKK2	R363C	R	363	C	577	germline	neutral	gnomAD	AF=1.88967e-01, allele-count=47475, n-homozygotes=5608	32461654
Q96RR4	CAMKK2	S10N	S	10	N	-	germline	neutral	gnomAD	AF=3.36400e-02, allele-count=8175, n-homozygotes=194	32461654
Q96RR4	CAMKK2	C123Y	C	123	Y	-	germline	neutral	gnomAD	AF=9.54412e-03, allele-count=2171, n-homozygotes=17	32461654
Q5VT25	CDC42BPA	D478A	D	478	A	-	experimental	loss	UniProt	MUTAGEN D->A: Prevents cleavage by CASP3, impairs the increase of its kinase activity and impairs extrusion apical actin ring assembly.	29162624
Q5VT25	CDC42BPA	K106A	K	106	A	96	experimental	loss	UniProt	MUTAGEN K->A: Loss of kinase activity.	11283256
Q5VT25	CDC42BPA	S234A	S	234	A	527	experimental	loss	UniProt	MUTAGEN S->A: Loss of autophosphorylation and kinase activity.	11283256
Q5VT25	CDC42BPA	T240A	T	240	A	536	experimental	loss	UniProt	MUTAGEN T->A: Loss of autophosphorylation and kinase activity.	11283256
Q5VT25	CDC42BPA	T403A	T	403	A	-	experimental	loss	UniProt	MUTAGEN T->A: Loss of autophosphorylation and kinase activity.	11283256
Q5VT25	CDC42BPA	R1211H	R	1211	H	-	germline	neutral	gnomAD	AF=6.78584e-03, allele-count=1706, n-homozygotes=43	32461654
Q5VT25	CDC42BPA	V1317I	V	1317	I	-	germline	neutral	gnomAD	AF=3.23339e-01, allele-count=81094, n-homozygotes=13696	32461654
Q5VT25	CDC42BPA	T1618A	T	1618	A	-	germline	neutral	gnomAD	AF=6.04686e-03, allele-count=1520, n-homozygotes=37	32461654
Q5VT25	CDC42BPA	A1699V	A	1699	V	-	germline	neutral	gnomAD	AF=0.112338, allele-count=198183, n-homozygotes=88064	32461654
Q5VT25	CDC42BPA	A1712V	A	1712	V	-	germline	neutral	gnomAD	AF=0.112338, allele-count=198183, n-homozygotes=88064	32461654
Q9Y5S2	CDC42BPB	R555Q	R	555	Q	-	germline	neutral	gnomAD	AF=1.19859e-03, allele-count=301, n-homozygotes=3	32461654
Q6DT37	CDC42BPG	P168L	P	168	L	365	germline	neutral	gnomAD	AF=8.86528e-03, allele-count=2216, n-homozygotes=16	32461654
Q6DT37	CDC42BPG	A537D	A	537	D	-	germline	neutral	gnomAD	AF=2.81521e-03, allele-count=585, n-homozygotes=10	32461654
Q6DT37	CDC42BPG	Q1135R	Q	1135	R	-	germline	neutral	gnomAD	AF=4.61951e-01, allele-count=113942, n-homozygotes=30274	32461654
O00311	CDC7	F162L	F	162	L	382	germline	neutral	gnomAD	AF=1.72108e-03, allele-count=431, n-homozygotes=8	32461654
O00311	CDC7	K441R	K	441	R	701	germline	neutral	gnomAD	AF=2.17835e-03, allele-count=514, n-homozygotes=9	32461654
P06493	CDK1	Y15F	Y	15	F	42	experimental	activating	PubMed	VARIANT constitutively-active	23741412
P06493	CDK1	Y4D	Y	4	D	31	experimental	decrease	UniProt	MUTAGEN Y->D,E: Constitutive polyubiquitination.	20395957
P06493	CDK1	Y4E	Y	4	E	31	experimental	decrease	UniProt	MUTAGEN Y->D,E: Constitutive polyubiquitination.	20395957
Q15131	CDK10	P96L	P	96	L	172	germline	neutral	gnomAD	AF=1.87381e-03, allele-count=469, n-homozygotes=7	32461654
Q15131	CDK10	C358Y	C	358	Y	-	germline	neutral	gnomAD	AF=3.47424e-03, allele-count=767, n-homozygotes=3	32461654
Q9NYV4	CDK12	D877N	D	877	N	479	experimental	loss	UniProt	MUTAGEN D->N: Abolishes kinase activity.	24662513
Q9NYV4	CDK12	L1189Q	L	1189	Q	-	germline	neutral	gnomAD	AF=1.79846e-03, allele-count=452, n-homozygotes=3	32461654
Q9NYV4	CDK12	P1275L	P	1275	L	-	germline	neutral	gnomAD	AF=1.16127e-02, allele-count=2886, n-homozygotes=30	32461654
Q14004	CDK13	L403F	L	403	F	-	germline	neutral	gnomAD	AF=3.97905e-03, allele-count=433, n-homozygotes=17	32461654
Q14004	CDK13	T500A	T	500	A	-	germline	neutral	gnomAD	AF=1.33217e-01, allele-count=33472, n-homozygotes=3278	32461654
Q14004	CDK13	T670R	T	670	R	-	germline	neutral	gnomAD	AF=3.88443e-03, allele-count=975, n-homozygotes=14	32461654
Q14004	CDK13	V1170M	V	1170	M	-	germline	neutral	gnomAD	AF=5.21782e-03, allele-count=1312, n-homozygotes=7	32461654
O94921	CDK14	K164R	K	164	R	96	experimental	loss	UniProt	MUTAGEN K->R: Abolishes protein kinase activity.	17517622,19524571
Q96Q40	CDK15	T255I	T	255	I	526	germline	neutral	gnomAD	AF=1.39014e-02, allele-count=3493, n-homozygotes=43	32461654
Q00536	CDK16	S153A	S	153	A	19	experimental	activating	UniProt	MUTAGEN S->A: Constitutively activated, due to loss of an inhibitory phosphorylation site. Increases interaction with CCNY.	22184064,22798068
Q00536	CDK16	S119A	S	119	A	-	experimental	decrease	UniProt	MUTAGEN S->A: Strongly reduces interaction with CCNY.	22184064
Q00536	CDK16	S153D	S	153	D	19	experimental	decrease	UniProt	MUTAGEN S->D: Abolishes interaction with CCNY.	22184064,22798068
Q00536	CDK16	S12A	S	12	A	-	experimental	loss	UniProt	MUTAGEN S->A: Abolishes phosphorylation by BRSK2. Abolishes effect on insulin secretion.	22798068
Q00536	CDK16	K194A	K	194	A	96	experimental	loss	UniProt	MUTAGEN K->A: Loss of kinase activity. Abolishes effect on insulin secretion.	22184064,22798068
Q00536	CDK16	K194R	K	194	R	96	experimental	loss	UniProt	MUTAGEN K->R: Loss of kinase activity.	22184064,22798068
Q07002	CDK18	G67R	G	67	R	-	germline	neutral	gnomAD	AF=7.89054e-02, allele-count=18102, n-homozygotes=1028	32461654
Q07002	CDK18	T166M	T	166	M	79	germline	neutral	gnomAD	AF=4.17434e-03, allele-count=1047, n-homozygotes=9	32461654
Q9BWU1	CDK19	G28R	G	28	R	38	germline	decrease	UniProt	VARIANT G -> R (in DEE87; decreased protein kinase activity)	33495529
Q9BWU1	CDK19	Y32H	Y	32	H	42	germline	increase	UniProt	VARIANT Y -> H (in DEE87; fails to rescue neurologic phenotypes in a Drosophila model system; increased protein kinase activity; dbSNP:rs1236246272)	32330417,33134521,33495529
P24941	CDK2	K9F	K	9	F	36	experimental	decrease	UniProt	MUTAGEN K->F: Reduced phosphorylation by CAK.	17373709
P24941	CDK2	L166R	L	166	R	538	experimental	decrease	UniProt	MUTAGEN L->R: Reduced phosphorylation by CAK and reduced kinase activity.	17373709
P24941	CDK2	T14A	T	14	A	41	experimental	increase	UniProt	MUTAGEN T->A: 2-fold increase in activity.	1396589
P24941	CDK2	Y15F	Y	15	F	42	experimental	increase	UniProt	MUTAGEN Y->F: 2-fold increase in activity.	1396589
P24941	CDK2	T160A	T	160	A	528	experimental	loss	UniProt	MUTAGEN T->A: Abolishes activity.	1396589
P24941	CDK2	T290S	T	290	S	856	germline	neutral	gnomAD	AF=2.32636e-03, allele-count=585, n-homozygotes=9	32461654
Q8IZL9	CDK20	T161A	T	161	A	528	experimental	decrease	UniProt	MUTAGEN T->A: Impairs CDK2 T-160 phosphorylation and activity.	14597612
Q00526	CDK3	T226I	T	226	I	692	germline	neutral	gnomAD	AF=1.17709e-03, allele-count=296, n-homozygotes=3	32461654
P11802	CDK4	R24C	R	24	C	53	experimental	activating	PubMed	VARIANT constitutively-active	21841792
P11802	CDK4	T172A	T	172	A	528	experimental	decrease	UniProt	MUTAGEN T->A: Weak enzyme activity towards RB1, but no effect on binding of CCDN1 nor CCDN3.	16782892
P11802	CDK4	P173S	P	173	S	529	experimental	decrease	UniProt	MUTAGEN P->S: No effect on in vitro phosphorylation by CDK7. Greatly reduced T-172 phosphorylation and enzyme activity.	19487459
Q00535	CDK5	S159T	S	159	T	528	experimental	decrease	UniProt	MUTAGEN S->T: Impaired p35/p25 (CDK5R1) binding.	11583627
Q00534	CDK6	D110N	D	110	N	254	germline	neutral	gnomAD	AF=1.46726e-03, allele-count=363, n-homozygotes=2	32461654
P50613	CDK7	K41A	K	41	A	96	experimental	loss	UniProt	MUTAGEN K->A: Total loss of activity.
P50613	CDK7	T170A	T	170	A	528	experimental	loss	UniProt	MUTAGEN T->A: Total loss of activity. Total loss of transcriptional activity of the reconstituted TFIIH complex.	8069918,9832506
P50613	CDK7	T285M	T	285	M	834	germline	neutral	gnomAD	AF=1.63432e-02, allele-count=3956, n-homozygotes=41	32461654
P49336	CDK8	D173A	D	173	A	479	experimental	loss	UniProt	MUTAGEN D->A: Abrogates kinase activity and TFIIH-dependent transcriptional repression.	10993082,30905399
P49336	CDK8	V27L	V	27	L	37	germline	decrease	UniProt	VARIANT V -> L (in IDDHBA; decreased protein kinase activity)	30905399
P49336	CDK8	R29G	R	29	G	39	germline	decrease	UniProt	VARIANT R -> G (in IDDHBA; decreased protein kinase activity; dbSNP:rs1593218885)	30905399
P49336	CDK8	G30S	G	30	S	40	germline	decrease	UniProt	VARIANT G -> S (in IDDHBA; decreased protein kinase activity; dbSNP:rs1593218890)	30905399
P49336	CDK8	S62L	S	62	L	145	germline	decrease	UniProt	VARIANT S -> L (in IDDHBA; decreased protein kinase activity; dbSNP:rs1565977796)	30905399
P49336	CDK8	R178Q	R	178	Q	485	germline	decrease	UniProt	VARIANT R -> Q (in IDDHBA; decreased protein kinase activity; dbSNP:rs1418353379)	30905399
P49336	CDK8	V193G	V	193	G	530	germline	decrease	UniProt	VARIANT V -> G (in IDDHBA; decreased protein kinase activity; dbSNP:rs1875421510)	30905399
P49336	CDK8	I223M	I	223	M	594	germline	decrease	UniProt	VARIANT I -> M (in IDDHBA; decreased protein kinase activity; dbSNP:rs1593310364)	30905399
P50750	CDK9	S175A	S	175	A	493	experimental	activating	UniProt	MUTAGEN S->A: Constitutive kinase activity.	21533037
P50750	CDK9	T186D	T	186	D	528	experimental	activating	UniProt	MUTAGEN T->D: Mimics autophosphorylation; constitutive kinase activity, independently of calcium signaling.	11145967,18566585,21448926
P50750	CDK9	K48R	K	48	R	96	experimental	activating	UniProt	MUTAGEN K->R: Decreased acetylation; leading to enhanced protein kinase activity.	28426094
P50750	CDK9	K44R	K	44	R	91	experimental	decrease	UniProt	MUTAGEN K->R: Impaired kinase and transcriptional elongation activities, but normal cyclin T1 and HEXIM1 binding.	17452463
P50750	CDK9	K48Q	K	48	Q	96	experimental	decrease	UniProt	MUTAGEN K->Q: Mimics acetylation; leading to impaired protein kinase activity.	28426094
P50750	CDK9	T186A	T	186	A	528	experimental	decrease	UniProt	MUTAGEN T->A: Abrogates autophosphorylation; no effect on kinase activity, but impaired CTD phosphorylation.	11145967,18566585,21448926
P50750	CDK9	S175D	S	175	D	493	experimental	loss	UniProt	MUTAGEN S->D: Mimics phosphorylation, constitutive loss of kinase activity.	21533037
P50750	CDK9	D167N	D	167	N	479	experimental	loss	UniProt	MUTAGEN D->N: Abrogates kinase activity.	10958691,11145967
Q00532	CDKL1	Q275E	Q	275	E	829	germline	neutral	gnomAD	AF=0.427776, allele-count=143277, n-homozygotes=41135	32461654
Q00532	CDKL1	L330V	L	330	V	-	germline	neutral	gnomAD	AF=4.35784e-02, allele-count=10592, n-homozygotes=321	32461654
Q5MAI5	CDKL4	S288Y	S	288	Y	854	germline	neutral	gnomAD	AF=2.21687e-03, allele-count=556, n-homozygotes=10	32461654
O76039	CDKL5	A40V	A	40	V	93	germline	decrease	UniProt	VARIANT A -> V (in DEE2; causes mislocalization of the protein in the cytoplasm; dbSNP:rs122460159)	17993579,18790821
O76039	CDKL5	C152F	C	152	F	478	germline	decrease	UniProt	VARIANT C -> F (in DEE2; affect activity; causes mislocalization of the protein in the cytoplasm; dbSNP:rs122460157)	1,549,954,916,935,860
O76039	CDKL5	L220P	L	220	P	669	germline	decrease	UniProt	VARIANT L -> P (in DEE2; causes mislocalization of the protein in the cytoplasm; dbSNP:rs267608511)	17993579,18790821
O76039	CDKL5	Q791P	Q	791	P	-	germline	neutral	gnomAD	AF=3.12716e-02, allele-count=5337, n-homozygotes=97	32461654
Q9Y5P4	CERT1	S132A	S	132	A	-	experimental	loss	UniProt	MUTAGEN S->A: Abolishes the phosphorylation. Strongly reduces the interaction with phosphatidylinositol 4-phosphate. Increases the ceramide transfer activity.	17591919
O14757	CHEK1	K132R	K	132	R	428	experimental	decrease	UniProt	MUTAGEN K->R: Strong reduction of chromatin-associated CHK1 ubiquitination.	32357935
O14757	CHEK1	S317A	S	317	A	-	experimental	decrease	UniProt	MUTAGEN S->A: Abrogates interaction with RAD51; when associated with A-345. Reduces phosphorylation and impairs activation by hydroxyurea and ionizing radiation. Abrogates nuclear retention upon checkpoint activation. Impairs interaction with FBXO6.	11390642,12588868,12676583,12676962,15665856
O14757	CHEK1	S345A	S	345	A	-	experimental	decrease	UniProt	MUTAGEN S->A: Abrogates interaction with RAD51; when associated with A-317. Reduces phosphorylation and impairs activation by hydroxyurea and ionizing radiation. Impairs interaction with YWHAZ which is required for nuclear retention after checkpoint activation.	11390642,12588868,12676583,12676962,15665856,19716789
O14757	CHEK1	S317E	S	317	E	-	experimental	increase	UniProt	MUTAGEN S->E: Enhances interaction with RAD51; when associated with E-345.	11390642,12588868,12676583,12676962,15665856
O14757	CHEK1	F344A	F	344	A	-	experimental	increase	UniProt	MUTAGEN F->A: Impairs nuclear export.	12676962
O14757	CHEK1	S345E	S	345	E	-	experimental	increase	UniProt	MUTAGEN S->E: Enhances interaction with RAD51; when associated with E-317.	11390642,12588868,12676583,12676962,15665856,19716789
O14757	CHEK1	M353A	M	353	A	-	experimental	increase	UniProt	MUTAGEN M->A: Impairs nuclear export.	12676962
O14757	CHEK1	K38R	K	38	R	96	experimental	loss	UniProt	MUTAGEN K->R: Abolishes kinase activity.	12446774,14681223
O14757	CHEK1	D130A	D	130	A	426	experimental	loss	UniProt	MUTAGEN D->A: Abolishes kinase activity.	10673501,11390642,11535615,11821419,12588868,14681206,15311285,9278511
O14757	CHEK1	I471V	I	471	V	-	germline	neutral	gnomAD	AF=0.026849, allele-count=244403, n-homozygotes=118967	32461654
O96017	CHEK2	S73A	S	73	A	-	experimental	decrease	UniProt	MUTAGEN S->A: Impaired activation, phosphorylation by ATM and G2/M transition checkpoint.	16481012
O96017	CHEK2	S379A	S	379	A	504	experimental	decrease	UniProt	MUTAGEN S->A: Abrogates autophosphorylation at Ser-379 and prevents ubiquitination.	18644861
O96017	CHEK2	T68A	T	68	A	-	experimental	loss	UniProt	MUTAGEN T->A: Loss of activation and phosphorylation.	11901158,15342622
O96017	CHEK2	D347A	D	347	A	426	experimental	loss	UniProt	MUTAGEN D->A: Loss of kinase activity and of the ability to phosphorylate CDC25A.	11298456,9836640
O96017	CHEK2	D368N	D	368	N	479	experimental	loss	UniProt	MUTAGEN D->N: Loss of autophosphorylation activity.	15342622
O96017	CHEK2	T383A	T	383	A	529	experimental	loss	UniProt	MUTAGEN T->A: Loss of phosphorylation in response to ionizing radiation.	11390408
O96017	CHEK2	T387A	T	387	A	536	experimental	loss	UniProt	MUTAGEN T->A: Loss of phosphorylation in response to ionizing radiation.	11390408
O96017	CHEK2	I157T	I	157	T	-	germline	neutral	gnomAD	AF=4.12066e-03, allele-count=1036, n-homozygotes=11	32461654
O96017	CHEK2	I448S	I	448	S	692	germline	neutral	gnomAD	AF=1.39794e-03, allele-count=351, n-homozygotes=2	32461654
O96017	CHEK2	H371Y	H	371	Y	482	tumor-predisposition	decrease	UniProt	VARIANT H -> Y (confers a moderate risk of breast cancer; partially reduces kinase activity; dbSNP:rs531398630)	21618645
O96017	CHEK2	R145W	R	145	W	-	tumor-predisposition	decrease	UniProt	VARIANT R -> W (in colon cancer and LFS2; does not cause protein abrogation in familial colorectal cancer; loss of the ability to interact with and phosphorylate CDC25A and to promote CDC25A degradation in response to ionizing radiation; dbSNP:rs137853007)	10617473,11298456,11719428,12610780,15535844,15818573
O96017	CHEK2	I157T	I	157	T	-	tumor-predisposition	decrease	UniProt	VARIANT I -> T (might influence susceptibility to different types of cancer; does not cause protein abrogation in familial colorectal cancer; loss of the ability to interact with and phosphorylate CDC25A and to promote CDC25A degradation in response to ionizing radiation; dbSNP:rs17879961)	10617473,11298456,11461078,12533788,12610780,14612911,15087378,15095295,15239132,15492928,15535844,15810020,15818573
O96017	CHEK2	Y390C	Y	390	C	540	tumor-predisposition	loss	UniProt	VARIANT Y -> C (in BC; does not phosphorylate p53/TP53; dbSNP:rs200928781)	25619829
O15111	CHUK	S176E	S	176	E	504	experimental	activating	UniProt	MUTAGEN S->E: Full activation.	9346484,9520446
O15111	CHUK	T23A	T	23	A	39	experimental	decrease	UniProt	MUTAGEN T->A: Loss of phosphorylation and decrease of kinase activity.	10485710
O15111	CHUK	K44A	K	44	A	96	experimental	loss	UniProt	MUTAGEN K->A: Loss of kinase activity.	9244310,9346484
O15111	CHUK	K44M	K	44	M	96	experimental	loss	UniProt	MUTAGEN K->M: Loss of autophosphorylation.	9244310,9346484
O15111	CHUK	S176A	S	176	A	504	experimental	loss	UniProt	MUTAGEN S->A: Loss of phosphorylation and of activity.	9346484,9520446
O15111	CHUK	V268I	V	268	I	801	germline	neutral	gnomAD	AF=4.73789e-01, allele-count=118957, n-homozygotes=29579	32461654
O15111	CHUK	V155A	V	155	A	463	germline	neutral	gnomAD	AF=1.19024e-02, allele-count=2991, n-homozygotes=89	32461654
Q9UPZ9	CILK1	T157A	T	157	A	528	experimental	decrease	UniProt	MUTAGEN T->A: Reduction of activity and loss of autophosphorylation. Loss of activity and autophosphorylation; when associated with F-159.	10699974
Q9UPZ9	CILK1	Y159F	Y	159	F	530	experimental	decrease	UniProt	MUTAGEN Y->F: Reduction of activity and loss of autophosphorylation. Loss of activity and autophosphorylation; when associated with A-157.	10699974
Q9UPZ9	CILK1	R272Q	R	272	Q	832	germline	decrease	UniProt	VARIANT R -> Q (in ECO; significantly impairs kinase activity; decreased localization at the ciliary tips; impaired ciliogenesis; results in abnormally elongated cilia; impairs mitosis, cell-cycle exit and radial neuroblast migration, while promoting apoptosis, when tested in a heterologous system; loss of nuclear localization; dbSNP:rs118203918)	19185282,24797473,24853502,29539279
O14578	CIT	G106V	G	106	V	40	germline	decrease	UniProt	VARIANT G -> V (in MCPH17; impairs kinase activity; exhibits abnormal mitotic cytokinesis; exhibits multipolar spindles; increases the neurons apoptotic process; dbSNP:rs886037892)	27453578
O14578	CIT	K126Q	K	126	Q	96	germline	decrease	UniProt	VARIANT K -> Q (in MCPH17; impairs kinase activity; exhibits abnormal mitotic cytokinesis; exhibits multipolar spindles; increases the neurons apoptotic process; dbSNP:rs886037893)	27453578
O14578	CIT	D230V	D	230	V	435	germline	decrease	UniProt	VARIANT D -> V (in MCPH17; impairs kinase activity; exhibits abnormal mitotic cytokinesis; exhibits multipolar spindles; increases the neurons apoptotic process; dbSNP:rs886037894)	27453578
O14578	CIT	G7E	G	7	E	-	germline	neutral	gnomAD	AF=2.29765e-02, allele-count=5766, n-homozygotes=113	32461654
O14578	CIT	R9Q	R	9	Q	-	germline	neutral	gnomAD	AF=4.92738e-03, allele-count=1237, n-homozygotes=6	32461654
P49759	CLK1	N99D	N	99	D	-	germline	neutral	gnomAD	AF=1.17322e-03, allele-count=295, n-homozygotes=6	32461654
Q9HAZ1	CLK4	K189R	K	189	R	96	experimental	loss	UniProt	MUTAGEN K->R: Loss of function.	11170754
Q9HAZ1	CLK4	L352F	L	352	F	577	germline	neutral	gnomAD	AF=3.76840e-03, allele-count=900, n-homozygotes=4	32461654
P07333	CSF1R	L301S	L	301	S	-	experimental	activating	UniProt	MUTAGEN L->S: Constitutive kinase activity.	15117969
P07333	CSF1R	D802V	D	802	V	491	experimental	activating	UniProt	MUTAGEN D->V: Constitutive kinase activity. Loss of inhibition by imatinib.	10340379,16170366
P07333	CSF1R	Y809F	Y	809	F	508	experimental	decrease	UniProt	MUTAGEN Y->F: Reduced kinase activity. Reduced interaction with SRC, FYN and YES1.	7681396
P07333	CSF1R	Y708F	Y	708	F	286	experimental	increase	UniProt	MUTAGEN Y->F: Impairs degradation of activated CSF1R.	10340379
P07333	CSF1R	Y969F	Y	969	F	-	experimental	loss	UniProt	MUTAGEN Y->F: Abolishes down-regulation of activated CSF1R.	15117969
P07333	CSF1R	P132L	P	132	L	-	germline	decrease	UniProt	VARIANT P -> L (in BANDDOS; impairs phosphorylation of JNK kinases upon stimulation with CSF1; dbSNP:rs1351319114)	30982609
P07333	CSF1R	E633K	E	633	K	149	germline	decrease	UniProt	VARIANT E -> K (in HDLS1; impairs autophosphorylation upon stimulation with CSF1; dbSNP:rs281860269)	22197934
P07333	CSF1R	G765D	G	765	D	384	germline	decrease	UniProt	VARIANT G -> D (in HDLS1; impairs autophosphorylation upon stimulation with CSF1; dbSNP:rs690016566)	24336230
P07333	CSF1R	M766T	M	766	T	385	germline	decrease	UniProt	VARIANT M -> T (in HDLS1; impairs autophosphorylation upon stimulation with CSF1; dbSNP:rs281860270)	22197934,23408870
P07333	CSF1R	I775N	I	775	N	419	germline	decrease	UniProt	VARIANT I -> N (in HDLS1; impairs autophosphorylation upon stimulation with CSF1; dbSNP:rs281860273)	22197934
P07333	CSF1R	A781E	A	781	E	429	germline	decrease	UniProt	VARIANT A -> E (in HDLS1; impairs autophosphorylation upon stimulation with CSF1; dbSNP:rs587777247)	24336230
P07333	CSF1R	R782H	R	782	H	430	germline	decrease	UniProt	VARIANT R -> H (in HDLS1; impairs autophosphorylation upon stimulation with CSF1; dbSNP:rs281860281)	23408870
P07333	CSF1R	I794T	I	794	T	477	germline	decrease	UniProt	VARIANT I -> T (in HDLS1; impairs autophosphorylation upon stimulation with CSF1; dbSNP:rs281860274)	22197934,24336230
P07333	CSF1R	P824S	P	824	S	543	germline	decrease	UniProt	VARIANT P -> S (in HDLS1; impairs autophosphorylation upon stimulation with CSF1)	24336230
P07333	CSF1R	M875T	M	875	T	676	germline	decrease	UniProt	VARIANT M -> T (in HDLS1; impairs autophosphorylation upon stimulation with CSF1; dbSNP:rs281860279)	22197934,23408870
P07333	CSF1R	V32G	V	32	G	-	germline	neutral	gnomAD	AF=3.38304e-03, allele-count=849, n-homozygotes=2	32461654
P07333	CSF1R	G413S	G	413	S	-	germline	neutral	gnomAD	AF=9.35163e-03, allele-count=2351, n-homozygotes=18	32461654
P07333	CSF1R	V279M	V	279	M	-	germline	neutral	gnomAD	AF=2.46928e-03, allele-count=621, n-homozygotes=11	32461654
P41240	CSK	Y304F	Y	304	F	390	experimental	decrease	UniProt	MUTAGEN Y->F: Decreases activity by two-thirds and alters conformation.	9148770
P41240	CSK	S364A	S	364	A	582	experimental	decrease	UniProt	MUTAGEN S->A: Strong decrease of phosphorylation by PRKACA (catalytic subunit of PKA).	11181701
P41240	CSK	Y184F	Y	184	F	20	experimental	loss	UniProt	MUTAGEN Y->F: Abolishes phosphorylation.	9148770
P41240	CSK	G287D	G	287	D	365	germline	neutral	gnomAD	AF=1.42633e-03, allele-count=358, n-homozygotes=3	32461654
Q8N752	CSNK1A1L	R170S	R	170	S	508	germline	neutral	gnomAD	AF=8.43526e-02, allele-count=21213, n-homozygotes=987	32461654
Q8N752	CSNK1A1L	R21W	R	21	W	35	germline	neutral	gnomAD	AF=1.10574e-03, allele-count=278, n-homozygotes=3	32461654
Q8N752	CSNK1A1L	D42E	D	42	E	91	germline	neutral	gnomAD	AF=0.464606, allele-count=134613, n-homozygotes=36938	32461654
Q8N752	CSNK1A1L	E177K	E	177	K	526	germline	neutral	gnomAD	AF=1.99211e-03, allele-count=501, n-homozygotes=6	32461654
Q8N752	CSNK1A1L	K230N	K	230	N	650	germline	neutral	gnomAD	AF=1.69082e-03, allele-count=425, n-homozygotes=8	32461654
P48730	CSNK1D	K38M	K	38	M	96	experimental	decrease	UniProt	MUTAGEN K->M: Impaired kinase activity and abnormal subcellular localization with exclusive accumulation to the nucleus.	11161704
P48730	CSNK1D	T176I	T	176	I	536	experimental	decrease	UniProt	MUTAGEN T->I: Impaired kinase activity and abnormal subcellular localization with exclusive accumulation to the nucleus.	11161704
P48730	CSNK1D	T44A	T	44	A	111	germline	decrease	UniProt	VARIANT T -> A (in FASPS2; strongly reduces kinase activity; dbSNP:rs104894561)	15800623,23636092
P48730	CSNK1D	H46R	H	46	R	117	germline	decrease	UniProt	VARIANT H -> R (in FASPS2; strongly reduces kinase activity; dbSNP:rs397514693)	23636092
P49674	CSNK1E	K38R	K	38	R	96	experimental	loss	UniProt	MUTAGEN K->R: Loss of kinase activity.	29222110
Q9HCP0	CSNK1G1	N169A	N	169	A	431	experimental	loss	UniProt	MUTAGEN N->A: Loss of kinase activity.	21680713
Q9HCP0	CSNK1G1	V329I	V	329	I	-	germline	neutral	gnomAD	AF=6.02091e-03, allele-count=1389, n-homozygotes=9	32461654
P53355	DAPK1	S289A	S	289	A	866	experimental	activating	UniProt	MUTAGEN S->A: Loss of phosphorylation and significant increase in proapoptotic activity.
P53355	DAPK1	S308D	S	308	D	-	experimental	decrease	UniProt	MUTAGEN S->D: Reduced Ca(2+)-calmodulin binding and Ca(2+)-calmodulin-independent kinase activity. Decreases apoptotic activity.	11579085
P53355	DAPK1	S289E	S	289	E	866	experimental	decrease	UniProt	MUTAGEN S->E: Reduction in proapoptotic activity.
P53355	DAPK1	S308A	S	308	A	-	experimental	increase	UniProt	MUTAGEN S->A: Elevated Ca(2+)-calmodulin binding and Ca(2+)-calmodulin-independent kinase activity. Increases apoptotic activity.	11579085
P53355	DAPK1	K42A	K	42	A	96	experimental	loss	UniProt	MUTAGEN K->A: Loss of activity, apoptotic function and of autophosphorylation.	11579085,7828849
P53355	DAPK1	V416I	V	416	I	-	germline	neutral	gnomAD	AF=2.34730e-02, allele-count=5856, n-homozygotes=828	32461654
P53355	DAPK1	M1272I	M	1272	I	-	germline	neutral	gnomAD	AF=3.33993e-03, allele-count=830, n-homozygotes=3	32461654
P53355	DAPK1	S1346N	S	1346	N	-	germline	neutral	gnomAD	AF=0.326097, allele-count=168031, n-homozygotes=57756	32461654
P53355	DAPK1	G1405V	G	1405	V	-	germline	neutral	gnomAD	AF=4.30934e-03, allele-count=1071, n-homozygotes=24	32461654
P53355	DAPK1	I622M	I	622	M	-	germline	neutral	gnomAD	AF=1.55854e-03, allele-count=385, n-homozygotes=2	32461654
Q9UIK4	DAPK2	S318A	S	318	A	-	experimental	activating	UniProt	MUTAGEN S->A: Loss of Ca(2+)-calmodulin independent phosphorylation, increase in apoptotic activity.	11230133
Q9UIK4	DAPK2	K52A	K	52	A	96	experimental	loss	UniProt	MUTAGEN K->A: Loss of activity, apoptotic function and of autophosphorylation.	10376525,10629061,11230133
O43293	DAPK3	T180A	T	180	A	536	experimental	decrease	UniProt	MUTAGEN T->A: Greatly reduced kinase activity.	21487036
O43293	DAPK3	K42A	K	42	A	96	experimental	loss	UniProt	MUTAGEN K->A: Loss of kinase activity at low concentrations of ATP.	17158456
O43293	DAPK3	D161A	D	161	A	479	experimental	loss	UniProt	MUTAGEN D->A: Loss of kinase activity.	17158456
O43293	DAPK3	T225A	T	225	A	654	experimental	loss	UniProt	MUTAGEN T->A: Loss of kinase activity.	17158456
O43293	DAPK3	T265A	T	265	A	834	experimental	loss	UniProt	MUTAGEN T->A: Loss of phosphorylation by ROCK1, catalytically inactive.	17158456
O43293	DAPK3	T299A	T	299	A	876	experimental	loss	UniProt	MUTAGEN T->A: Loss of phosphorylation by ROCK1.	17158456
O43293	DAPK3	T112M	T	112	M	365	somatic	decrease	UniProt	VARIANT T -> M (in a colorectal adenocarcinoma sample; somatic mutation; greatly reduces kinase activity, increases cell proliferation and cell survival)	17344846,21487036
O43293	DAPK3	D161N	D	161	N	479	somatic	decrease	UniProt	VARIANT D -> N (in an ovarian mucinous carcinoma sample; somatic mutation; greatly reduces kinase activity, increases cell proliferation and cell survival)	17344846,21487036
O43293	DAPK3	P216S	P	216	S	610	somatic	decrease	UniProt	VARIANT P -> S (in a lung neuroendocrine carcinoma sample; somatic mutation; greatly reduces kinase activity, increases cell proliferation, cell adhesion and cell survival)	17344846,21487036
Q9C098	DCLK3	R24Q	R	24	Q	-	germline	neutral	gnomAD	AF=7.07259e-03, allele-count=916, n-homozygotes=7	32461654
Q9C098	DCLK3	E633D	E	633	D	872	germline	neutral	gnomAD	AF=9.85364e-03, allele-count=2456, n-homozygotes=21	32461654
Q08345	DDR1	N211A	N	211	A	-	experimental	activating	UniProt	MUTAGEN N->A: Phosphorylates regardless of collagen presence, collagen addition does not alter significantly the levels of constitutive phosphorylation.	24509848
Q08345	DDR1	S213A	S	213	A	-	experimental	activating	UniProt	MUTAGEN S->A: Phosphorylates regardless of collagen presence, collagen addition does not alter significantly the levels of constitutive phosphorylation.	24509848
Q08345	DDR1	R105A	R	105	A	-	experimental	decrease	UniProt	MUTAGEN R->A: Inhibits collagen-induced phosphorylation.	24509848
Q08345	DDR1	N260Q	N	260	Q	-	experimental	decrease	UniProt	MUTAGEN N->Q: Phosphorylates in response to collagen, but at lower levels compared to wild-type. No activation in the absence of collagen.	24509848
Q08345	DDR1	N371Q	N	371	Q	-	experimental	decrease	UniProt	MUTAGEN N->Q: Phosphorylates in response to collagen, but at lower levels compared to wild-type. No activation in the absence of collagen.	24509848
Q08345	DDR1	N394Q	N	394	Q	-	experimental	decrease	UniProt	MUTAGEN N->Q: Phosphorylates in response to collagen, but at lower levels compared to wild-type. No activation in the absence of collagen.	24509848
Q08345	DDR1	Y740F	Y	740	F	366	experimental	decrease	UniProt	MUTAGEN Y->F: Abolishes interaction with PTPN11.	16337946
Q08345	DDR1	G707A	G	707	A	240	experimental	increase	UniProt	MUTAGEN G->A: Confers over 20-fold resistance to the ability of an inhibitor to inhibit autophosphorylation.	23899692
Q16832	DDR2	Y736F	Y	736	F	498	experimental	decrease	UniProt	MUTAGEN Y->F: Reduces autophosphorylation. Abolishes phosphorylation by SRC; when associated with F-740 and F-741.	16186108
Q16832	DDR2	Y741F	Y	741	F	508	experimental	decrease	UniProt	MUTAGEN Y->F: Reduces autophosphorylation. Abolishes phosphorylation by SRC; when associated with F-736 and F-740.	16186108
Q16832	DDR2	Y740F	Y	740	F	507	experimental	increase	UniProt	MUTAGEN Y->F: Promotes autophosphorylation. Abolishes phosphorylation by SRC; when associated with F-736 and F-741.	16186108
Q16832	DDR2	K608A	K	608	A	96	experimental	loss	UniProt	MUTAGEN K->A: Abolishes kinase activity.	16186108
Q16832	DDR2	L610P	L	610	P	98	germline	increase	UniProt	VARIANT L -> P (in WRCN; increased autophosphorylation in patient fibroblasts)	30449416
Q16832	DDR2	Y740C	Y	740	C	507	germline	increase	UniProt	VARIANT Y -> C (in WRCN; increased autophosphorylation in patient fibroblasts)	30449416
Q16832	DDR2	M441I	M	441	I	-	germline	neutral	gnomAD	AF=1.44913e-02, allele-count=3641, n-homozygotes=29	32461654
Q09013	DMPK	K100A	K	100	A	96	experimental	loss	UniProt	MUTAGEN K->A: Loss of kinase activity.	15598648
Q09013	DMPK	L423V	L	423	V	-	germline	neutral	gnomAD	AF=1.38133e-01, allele-count=22890, n-homozygotes=1811	32461654
Q6XUX3	DSTYK	L432V	L	432	V	-	germline	neutral	gnomAD	AF=3.13140e-02, allele-count=7702, n-homozygotes=168	32461654
Q13627	DYRK1A	Y321F	Y	321	F	530	experimental	decrease	UniProt	MUTAGEN Y->F: Mildly reduces kinase activity. Does not abolish autophosphorylation on tyrosine residues.	23665168
Q13627	DYRK1A	K188R	K	188	R	96	experimental	loss	UniProt	MUTAGEN K->R: Abolished protein kinase activity.	23665168,25620562
Q9Y463	DYRK1B	D239A	D	239	A	426	experimental	loss	UniProt	MUTAGEN D->A: Abolishes kinase activity.	32611815
Q9Y463	DYRK1B	R102C	R	102	C	22	germline	decrease	UniProt	VARIANT R -> C (in AOMS3; accumulation of intracellular lipid is significantly greater than with wild-type protein; cells expressing the variant are able to transform into mature adipocytes without requiring adipogenic medium; expression levels of CEBPA, PPARG forms 1 and 2 and PPARGC1A are higher and those of GLI1 and CDKN1B are lower in cells transfected with the mutant protein compared to wild…	24827035
Q9Y463	DYRK1B	H90P	H	90	P	10	germline	increase	UniProt	VARIANT H -> P (in AOMS3; expression of glucose-6-phosphatase is significantly higher than wild-type; dbSNP:rs587777380)	24827035
Q9Y463	DYRK1B	L28P	L	28	P	-	germline	neutral	gnomAD	AF=4.26940e-03, allele-count=1068, n-homozygotes=21	32461654
Q92630	DYRK2	K251R	K	251	R	96	experimental	loss	UniProt	MUTAGEN K->R: Abolishes protein serine/threonine kinase activity.	23362280
Q92630	DYRK2	H245N	H	245	N	83	germline	neutral	gnomAD	AF=9.94093e-03, allele-count=2494, n-homozygotes=18	32461654
O43781	DYRK3	S350A	S	350	A	474	experimental	decrease	UniProt	MUTAGEN S->A: Decreased stability of the protein.	29634919
O43781	DYRK3	S350E	S	350	E	474	experimental	increase	UniProt	MUTAGEN S->E,D: Phosphomimetic mutant; increased stability of the protein.	29634919
O43781	DYRK3	S350D	S	350	D	474	experimental	increase	UniProt	MUTAGEN S->E,D: Phosphomimetic mutant; increased stability of the protein.	29634919
O43781	DYRK3	K238M	K	238	M	96	experimental	loss	UniProt	MUTAGEN K->M: Kinase dead; Induces formation of stress granules-like in absence of stress. Impaired dissolution of membraneless organelles during mitosis, such as stress granules, nuclear speckles and pericentriolar material.	23415227,29634919,29973724
Q9NR20	DYRK4	K133R	K	133	R	96	experimental	loss	UniProt	MUTAGEN K->R: Loss of kinase activity.	17292540
Q9NR20	DYRK4	Y264F	Y	264	F	530	experimental	loss	UniProt	MUTAGEN Y->F: Abolishes kinase activity.	21127067
Q9NR20	DYRK4	N189S	N	189	S	240	germline	neutral	gnomAD	AF=2.59881e-02, allele-count=6532, n-homozygotes=312	32461654
Q9NR20	DYRK4	D454V	D	454	V	-	germline	neutral	gnomAD	AF=4.65412e-03, allele-count=1170, n-homozygotes=13	32461654
O00418	EEF2K	S78A	S	78	A	-	experimental	decrease	UniProt	MUTAGEN S->A: Decreased kinase activity.	22216903
O00418	EEF2K	T348A	T	348	A	-	experimental	decrease	UniProt	MUTAGEN T->A: Decreased kinase activity.	22216903
O00418	EEF2K	S366A	S	366	A	-	experimental	decrease	UniProt	MUTAGEN S->A: Decreased kinase activity.	11500364,22216903
O00418	EEF2K	H23R	H	23	R	-	germline	neutral	gnomAD	AF=1.42618e-01, allele-count=35853, n-homozygotes=3587	32461654
O00418	EEF2K	P75A	P	75	A	-	germline	neutral	gnomAD	AF=1.15483e-01, allele-count=29002, n-homozygotes=2294	32461654
P00533	EGFR	V689M	V	689	M	7	experimental	activating	UniProt	MUTAGEN V->M: Constitutively activated kinase.	19560417
P00533	EGFR	Y1069F	Y	1069	F	-	experimental	activating	UniProt	MUTAGEN Y->F: Abolishes interaction with CBLC.	22888118
P00533	EGFR	G652R	G	652	R	-	experimental	activating	PubMed	VARIANT constitutively-active	36148499
P00533	EGFR	L688A	L	688	A	6	experimental	decrease	UniProt	MUTAGEN L->A: Strongly reduced phosphorylation.	19560417,19563760
P00533	EGFR	V689A	V	689	A	7	experimental	decrease	UniProt	MUTAGEN V->A: Reduced autophosphorylation.	19560417
P00533	EGFR	E690A	E	690	A	8	experimental	decrease	UniProt	MUTAGEN E->A: Reduced phosphorylation.	19560417,19563760
P00533	EGFR	L692A	L	692	A	10	experimental	decrease	UniProt	MUTAGEN L->A,P: Strongly reduced phosphorylation.	19560417,19563760
P00533	EGFR	T693D	T	693	D	11	experimental	decrease	UniProt	MUTAGEN T->D: Strongly reduced phosphorylation.	19560417
P00533	EGFR	P694A	P	694	A	12	experimental	decrease	UniProt	MUTAGEN P->A: Strongly reduced phosphorylation.	19560417
P00533	EGFR	P699A	P	699	A	17	experimental	decrease	UniProt	MUTAGEN P->A: Reduced phosphorylation.	19560417
P00533	EGFR	D974A	D	974	A	859	experimental	decrease	UniProt	MUTAGEN D->A: Strongly reduced phosphorylation.
P00533	EGFR	R977A	R	977	A	862	experimental	decrease	UniProt	MUTAGEN R->A: Reduced phosphorylation.	19563760
P00533	EGFR	R1068G	R	1068	G	-	experimental	increase	UniProt	MUTAGEN R->G: Strongly decreases interaction with CBLC.	22888118
P00533	EGFR	R429E	R	429	E	-	experimental	loss	UniProt	MUTAGEN R->E: Abolishes autophosphorylation and activation of downstream kinases.	12297050
P00533	EGFR	N700A	N	700	A	18	experimental	loss	UniProt	MUTAGEN N->A: Abolishes phosphorylation.	19560417
P00533	EGFR	L704A	L	704	A	22	experimental	loss	UniProt	MUTAGEN L->A: Abolishes phosphorylation.	19560417
P00533	EGFR	R705A	R	705	A	23	experimental	loss	UniProt	MUTAGEN R->A: Abolishes phosphorylation.	19560417
P00533	EGFR	I706A	I	706	A	24	experimental	loss	UniProt	MUTAGEN I->A: Abolishes phosphorylation.	19560417
P00533	EGFR	K745A	K	745	A	96	experimental	loss	UniProt	MUTAGEN K->A,M: Abolishes kinase activity.	19560417
P00533	EGFR	K745M	K	745	M	96	experimental	loss	UniProt	MUTAGEN K->A,M: Abolishes kinase activity.	19560417
P00533	EGFR	G428D	G	428	D	-	germline	loss	UniProt	VARIANT G -> D (in NISBD2; loss of function; the mutant does not localize to the cell membrane; has diffuse cytoplasmic localization; dbSNP:rs606231253)	24691054
P00533	EGFR	R521K	R	521	K	-	germline	neutral	gnomAD	AF=2.92102e-01, allele-count=73445, n-homozygotes=11842	32461654
P00533	EGFR	E709G	E	709	G	27	somatic	activating	UniProt	VARIANT E -> G (found in a lung cancer sample; constitutively activated kinase with higher levels of basal autophosphorylation; more sensitive to gefitinib than wild-type; dbSNP:rs397517085)	15623594,16205628
P00533	EGFR	G719S	G	719	S	38	somatic	activating	UniProt+PubMed	VARIANT G -> S (found in a lung cancer sample; somatic mutation; strongly increased kinase activity; constitutively activated kinase with higher levels of basal autophosphorylation; more sensitive to gefitinib than wild-type; dbSNP:rs28929495)	15118125,15623594,16205628,16533793,17349580
P00533	EGFR	L858R	L	858	R	482	somatic	activating	UniProt+PubMed	VARIANT L -> R (found in a lung cancer sample; somatic mutation; constitutively activated enzyme with strongly increased kinase activity; more sensitive to gefitinib than wild-type; dbSNP:rs121434568)	15118125,15623594,16205628,16533793,17349580
P00533	EGFR	L792V	L	792	V	235	somatic	resistance	COSMIC	-	-
P00533	EGFR	T790M	T	790	M	233	somatic	resistance	COSMIC	-	-
P00533	EGFR	L718Q	L	718	Q	37	somatic	resistance	COSMIC	-	-
P00533	EGFR	C797S	C	797	S	241	somatic	resistance	COSMIC	-	-
P00533	EGFR	G796D	G	796	D	240	somatic	resistance	COSMIC	-	-
P00533	EGFR	L718V	L	718	V	37	somatic	resistance	COSMIC	-	-
P00533	EGFR	G719A	G	719	A	38	somatic	resistance	COSMIC	-	-
P00533	EGFR	C797G	C	797	G	241	somatic	resistance	COSMIC	-	-
P00533	EGFR	L792F	L	792	F	235	somatic	resistance	COSMIC	-	-
P00533	EGFR	L792H	L	792	H	235	somatic	resistance	COSMIC	-	-
P00533	EGFR	G796R	G	796	R	240	somatic	resistance	COSMIC	-	-
P00533	EGFR	L792R	L	792	R	235	somatic	resistance	COSMIC	-	-
P00533	EGFR	L747P	L	747	P	98	somatic	resistance	COSMIC	-	-
P00533	EGFR	G796S	G	796	S	240	somatic	resistance	COSMIC	-	-
P00533	EGFR	L792P	L	792	P	235	somatic	resistance	COSMIC	-	-
P00533	EGFR	D761Y	D	761	Y	148	somatic	resistance	COSMIC	-	-
P00533	EGFR	L861Q	L	861	Q	491	somatic/tumor-predisposition	activating	UniProt	VARIANT L -> Q (found in a lung cancer sample; constitutively activated kinase with higher levels of basal autophosphorylation; more sensitive to gefitinib than wild-type; dbSNP:rs121913444)	15623594,16205628,16533793
P00533	EGFR	S768I	S	768	I	156	somatic/tumor-predisposition	activating	UniProt	VARIANT S -> I (found in a lung cancer sample; constitutively activated kinase with higher levels of basal autophosphorylation; more sensitive to gefitinib than wild-type; dbSNP:rs121913465)	15623594,16205628
P00533	EGFR	T790M	T	790	M	233	somatic/tumor-predisposition	increase	UniProt	VARIANT T -> M (found in a lung cancer sample; increased kinase activity; dbSNP:rs121434569)	16533793,18227510
Q9BQI3	EIF2AK1	I448V	I	448	V	432	germline	decrease	UniProt	VARIANT I -> V (in LEMSPAD; unknown pathological significance; mildly reduced phosphorylation of eukaryotic translation initiation factor 2-alpha; dbSNP:rs1583476115)	32197074
Q9BQI3	EIF2AK1	K558R	K	558	R	816	germline	neutral	gnomAD	AF=9.03343e-02, allele-count=22718, n-homozygotes=1958	32461654
Q9BQI3	EIF2AK1	R134K	R	134	K	-	germline	neutral	gnomAD	AF=1.70705e-03, allele-count=423, n-homozygotes=6	32461654
Q9BQI3	EIF2AK1	L319H	L	319	H	-	germline	neutral	gnomAD	AF=1.53923e-02, allele-count=3871, n-homozygotes=53	32461654
P19525	EIF2AK2	T258A	T	258	A	22	experimental	decrease	UniProt	MUTAGEN T->A: Moderate loss of activity.	11152499
P19525	EIF2AK2	T446A	T	446	A	528	experimental	decrease	UniProt	MUTAGEN T->A: Significant loss of activity and impairs autophosphorylation of T-451.	11337501
P19525	EIF2AK2	A67E	A	67	E	-	experimental	loss	UniProt	MUTAGEN A->E: Significant loss of activity; loss of dsRNA binding and dimerization.	11337501
P19525	EIF2AK2	K296R	K	296	R	96	experimental	loss	UniProt	MUTAGEN K->R: Loss of activity.	11152499
P19525	EIF2AK2	T451A	T	451	A	536	experimental	loss	UniProt	MUTAGEN T->A: Loss of activity.	11337501
P19525	EIF2AK2	M11L	M	11	L	-	germline	decrease	UniProt	VARIANT M -> L (in LEUDEN; unknown pathological significance; reduced phosphorylation of eukaryotic translation initiation factor 2-alpha in patient cells)	32197074
P19525	EIF2AK2	Y133F	Y	133	F	-	germline	decrease	UniProt	VARIANT Y -> F (in LEUDEN; unknown pathological significance; reduced phosphorylation of eukaryotic translation initiation factor 2-alpha in patient cells)	32197074
P19525	EIF2AK2	S461C	S	461	C	575	germline	decrease	UniProt	VARIANT S -> C (in LEUDEN; unknown pathological significance; reduced phosphorylation of eukaryotic translation initiation factor 2-alpha in patient cells)	32197074
P19525	EIF2AK2	G130R	G	130	R	-	germline	increase	UniProt	VARIANT G -> R (in DYT33; gain-of-function variant resulting in increased levels of phosphorylated EIF2AK2 and EIF2A in patient cells compared to controls)	33236446,33866603,35146068
P19525	EIF2AK2	N32T	N	32	T	-	germline	increase	UniProt	VARIANT N -> T (in DYT33; unknown pathological significance; gain-of-function variant resulting in increased levels of phosphorylated EIF2AK2 and EIF2A in patient cells compared to controls)	33236446
Q9NZJ5	EIF2AK3	S136C	S	136	C	-	germline	neutral	gnomAD	AF=3.02589e-01, allele-count=76063, n-homozygotes=12733	32461654
Q9NZJ5	EIF2AK3	Q166R	Q	166	R	-	germline	neutral	gnomAD	AF=0.368134, allele-count=158568, n-homozygotes=51348	32461654
Q9P2K8	EIF2AK4	I441L	I	441	L	477	germline	neutral	gnomAD	AF=1.50044e-01, allele-count=37441, n-homozygotes=4640	32461654
Q9P2K8	EIF2AK4	G1306C	G	1306	C	-	germline	neutral	gnomAD	AF=1.29438e-01, allele-count=32266, n-homozygotes=2603	32461654
Q9P2K8	EIF2AK4	K1336R	K	1336	R	-	germline	neutral	gnomAD	AF=1.25427e-03, allele-count=313, n-homozygotes=3	32461654
P21709	EPHA1	V160A	V	160	A	-	germline	neutral	gnomAD	AF=0.067099, allele-count=232979, n-homozygotes=108962	32461654
P21709	EPHA1	R492Q	R	492	Q	-	germline	neutral	gnomAD	AF=1.24490e-02, allele-count=3127, n-homozygotes=31	32461654
P21709	EPHA1	P697L	P	697	L	219	germline	neutral	gnomAD	AF=4.84726e-02, allele-count=12164, n-homozygotes=347	32461654
Q5JZY3	EPHA10	T220K	T	220	K	-	germline	neutral	gnomAD	AF=3.97859e-02, allele-count=9135, n-homozygotes=743	32461654
Q5JZY3	EPHA10	F281I	F	281	I	-	germline	neutral	gnomAD	AF=2.98364e-01, allele-count=71250, n-homozygotes=11422	32461654
Q5JZY3	EPHA10	L629P	L	629	P	-	germline	neutral	gnomAD	AF=6.76329e-02, allele-count=16859, n-homozygotes=700	32461654
Q5JZY3	EPHA10	V645I	V	645	I	30	germline	neutral	gnomAD	AF=6.86002e-02, allele-count=17113, n-homozygotes=721	32461654
Q5JZY3	EPHA10	G749E	G	749	E	376	germline	neutral	gnomAD	AF=1.40381e-01, allele-count=34418, n-homozygotes=2867	32461654
Q5JZY3	EPHA10	R807Q	R	807	Q	530	germline	neutral	gnomAD	AF=6.75093e-02, allele-count=16787, n-homozygotes=704	32461654
P29317	EPHA2	R103E	R	103	E	-	experimental	decrease	UniProt	MUTAGEN R->E: Significantly reduced response to EFNA1.	19525919
P29317	EPHA2	D739N	D	739	N	426	experimental	increase	UniProt	MUTAGEN D->N: Increases serum-induced chemotaxis. Loss of EFNA1-dependent regulation of cell migration.	19573808
P29317	EPHA2	K646M	K	646	M	96	experimental	loss	UniProt	MUTAGEN K->M: Loss of kinase activity.	16236711
P29317	EPHA2	S897D	S	897	D	876	experimental	loss	UniProt	MUTAGEN S->A,D: Loss of serum-induced phosphorylation by PKB. Loss of serum-induced chemotaxis.	19573808
P29317	EPHA2	R721Q	R	721	Q	379	germline	activating	UniProt	VARIANT R -> Q (in CTRCT6; retained in the cytoplasm and constitutively active it alters EPHA2 signaling; dbSNP:rs116506614)	19649315
P29317	EPHA2	G391R	G	391	R	-	germline	neutral	gnomAD	AF=2.46157e-02, allele-count=6175, n-homozygotes=215	32461654
P29317	EPHA2	T511M	T	511	M	-	germline	neutral	gnomAD	AF=2.53296e-03, allele-count=636, n-homozygotes=10	32461654
P29317	EPHA2	R876H	R	876	H	855	germline	neutral	gnomAD	AF=1.71376e-02, allele-count=4304, n-homozygotes=44	32461654
P29317	EPHA2	M631T	M	631	T	53	germline	neutral	gnomAD	AF=4.73624e-03, allele-count=1190, n-homozygotes=33	32461654
P29320	EPHA3	V133E	V	133	E	-	experimental	loss	UniProt	MUTAGEN V->E: Loss of EFNA5-binding ability and function.	14660665
P29320	EPHA3	F152L	F	152	L	-	experimental	loss	UniProt	MUTAGEN F->L: Loss of EFNA5-binding ability and function.	14660665
P29320	EPHA3	I564V	I	564	V	-	germline	neutral	gnomAD	AF=1.76636e-03, allele-count=443, n-homozygotes=5	32461654
P29320	EPHA3	W924R	W	924	R	-	germline	neutral	gnomAD	AF=3.70116e-01, allele-count=92925, n-homozygotes=18704	32461654
P54756	EPHA5	N81T	N	81	T	-	germline	neutral	gnomAD	AF=4.77977e-02, allele-count=11991, n-homozygotes=351	32461654
P54756	EPHA5	A672T	A	672	T	28	germline	neutral	gnomAD	AF=2.38743e-02, allele-count=5984, n-homozygotes=90	32461654
Q9UF33	EPHA6	A711V	A	711	V	857	germline	neutral	gnomAD	AF=2.90024e-02, allele-count=7210, n-homozygotes=551	32461654
Q15375	EPHA7	I138V	I	138	V	-	germline	neutral	gnomAD	AF=5.26846e-02, allele-count=13231, n-homozygotes=616	32461654
Q15375	EPHA7	P278S	P	278	S	-	germline	neutral	gnomAD	AF=5.26799e-02, allele-count=13131, n-homozygotes=611	32461654
P29322	EPHA8	E612Q	E	612	Q	8	germline	neutral	gnomAD	AF=9.29866e-02, allele-count=23319, n-homozygotes=1201	32461654
P29322	EPHA8	G45S	G	45	S	-	germline	neutral	gnomAD	AF=6.72950e-03, allele-count=1635, n-homozygotes=9	32461654
P29322	EPHA8	P321L	P	321	L	-	germline	neutral	gnomAD	AF=3.10069e-03, allele-count=774, n-homozygotes=11	32461654
P54762	EPHB1	Y594F	Y	594	F	5	experimental	decrease	UniProt	MUTAGEN Y->F: Loss of interaction with NCK1.	9430661
P54762	EPHB1	Y600F	Y	600	F	11	experimental	decrease	UniProt	MUTAGEN Y->F: Loss of interaction with SHC1 and SRC.	12925710
P54762	EPHB1	Y778F	Y	778	F	508	experimental	decrease	UniProt	MUTAGEN Y->F: Loss of interaction with SHC1.	12925710
P54762	EPHB1	Y928F	Y	928	F	-	experimental	decrease	UniProt	MUTAGEN Y->F: Disrupts binding with the GRB10 SH2 domain, providing evidence for phosphorylation. Disrupts interaction with GRB7 and ACP1.	12223469,8798570,9499402
P54762	EPHB1	K651R	K	651	R	96	experimental	loss	UniProt	MUTAGEN K->R: Kinase-dead mutant. Unable to autophosphorylate, to interact with SH2 domain-containing interactors, to activate the MAPK/ERK and JUN signaling cascades. Not ubiquitinated by CBL.	18034775,9430661
P54753	EPHB3	K665R	K	665	R	96	experimental	loss	UniProt	MUTAGEN K->R: Kinase-dead. Loss of autophosphorylation.	9674711
P54760	EPHB4	L95R	L	95	R	-	experimental	decrease	UniProt	MUTAGEN L->R: Reduces binding affinity for EFNB2.	16867992
P54760	EPHB4	K650N	K	650	N	102	germline	decrease	UniProt	VARIANT K -> N (in CMAVM2; highly decreased tyrosine phosphorylation; highly decreased interaction with RASA1; dbSNP:rs1584658113)	30578106
P54760	EPHB4	F867L	F	867	L	842	germline	decrease	UniProt	VARIANT F -> L (in CMAVM2; loss of tyrosine phosphorylation; loss of interaction with RASA1; dbSNP:rs1584652949)	30578106
P54760	EPHB4	E664K	E	664	K	149	germline	loss	UniProt	VARIANT E -> K (in CMAVM2; the mutant protein is not detected by Western blot; loss of localization to cell membrane; dbSNP:rs1562969219)	28687708
P54760	EPHB4	R739Q	R	739	Q	424	germline	loss	UniProt	VARIANT R -> Q (in LMPHM7; loss of kinase activity; dbSNP:rs1057519263)	27400125
P54760	EPHB4	I782S	I	782	S	535	germline	loss	UniProt	VARIANT I -> S (in LMPHM7; loss of kinase activity; dbSNP:rs1057519264)	27400125
P54760	EPHB4	R838W	R	838	W	664	germline	loss	UniProt	VARIANT R -> W (in CMAVM2; the mutant protein is not detected by Western blot; loss of localization to cell membrane; dbSNP:rs764827256)	28687708
P54760	EPHB4	C845R	C	845	R	762	germline	loss	UniProt	VARIANT C -> R (in CMAVM2; the mutant protein is not detected by Western blot; loss of localization to cell membrane; dbSNP:rs1584653054)	28687708
P54760	EPHB4	R864W	R	864	W	832	germline	loss	UniProt	VARIANT R -> W (in CMAVM2; the mutant protein is not detected by Western blot; loss of localization to cell membrane; dbSNP:rs769965440)	28687708
P54760	EPHB4	A371V	A	371	V	-	germline	neutral	gnomAD	AF=1.89744e-03, allele-count=448, n-homozygotes=9	32461654
P54760	EPHB4	A882T	A	882	T	858	germline	neutral	gnomAD	AF=1.19497e-03, allele-count=218, n-homozygotes=2	32461654
P54760	EPHB4	E890D	E	890	D	866	germline	neutral	gnomAD	AF=5.63475e-03, allele-count=1027, n-homozygotes=5	32461654
O15197	EPHB6	G122S	G	122	S	-	germline	neutral	gnomAD	AF=7.38328e-03, allele-count=1843, n-homozygotes=9	32461654
O15197	EPHB6	S324A	S	324	A	-	germline	neutral	gnomAD	AF=3.81515e-02, allele-count=9552, n-homozygotes=336	32461654
O15197	EPHB6	S332L	S	332	L	-	germline	neutral	gnomAD	AF=2.22671e-03, allele-count=558, n-homozygotes=7	32461654
P04626	ERBB2	Q646C	Q	646	C	-	experimental	activating	PubMed	VARIANT constitutively-active	24791013
P04626	ERBB2	A710V	A	710	V	19	germline	loss	UniProt	VARIANT A -> V (in VSCN2; almost complete loss of ERBB2 and ERBB3 phosphorylation in the presence or in the absence of NRG1 stimulation, suggesting alteration of downstream signaling; does not affect the subcellular localization at the cell membrane)	33497358
P04626	ERBB2	I654V	I	654	V	-	germline	neutral	gnomAD	AF=4.89619e-03, allele-count=1231, n-homozygotes=9	32461654
P04626	ERBB2	I655V	I	655	V	-	germline	neutral	gnomAD	AF=1.96355e-01, allele-count=49359, n-homozygotes=5514	32461654
P04626	ERBB2	W452C	W	452	C	-	germline	neutral	gnomAD	AF=3.72805e-03, allele-count=921, n-homozygotes=14	32461654
P04626	ERBB2	P1170A	P	1170	A	-	germline	neutral	gnomAD	AF=0.390569, allele-count=152231, n-homozygotes=48843	32461654
P04626	ERBB2	A1216D	A	1216	D	-	germline	neutral	gnomAD	AF=5.66298e-03, allele-count=1421, n-homozygotes=6	32461654
P04626	ERBB2	V659E	V	659	E	-	somatic	activating	PubMed	VARIANT constitutively-active	31431454,16489002
P04626	ERBB2	S310Y	S	310	Y	-	somatic	resistance	COSMIC	-	-
P04626	ERBB2	L869R	L	869	R	491	somatic	resistance	COSMIC	-	-
P21860	ERBB3	K742M	K	742	M	96	experimental	decrease	UniProt	MUTAGEN K->M: Strongly reduced autophosphorylation.	20351256
P21860	ERBB3	Y868E	Y	868	E	526	experimental	decrease	UniProt	MUTAGEN Y->E: Strongly reduced tyrosine phosphorylation.	20351256
P21860	ERBB3	T873S	T	873	S	535	germline	decrease	UniProt	VARIANT T -> S (in VSCN1; unknown pathological significance; some decrease in ERBB2 phosphorylation upon NG1 treatment, compared to wild-type; does not affect the subcellular localization at the cell membrane)	33497358
P21860	ERBB3	Q932R	Q	932	R	681	germline	decrease	UniProt	VARIANT Q -> R (in VSCN1; unknown pathological significance; some decrease in ERBB2 phosphorylation upon NG1 treatment, compared to wild-type; does not affect the subcellular localization at the cell membrane)	33497358
P21860	ERBB3	T787P	T	787	P	233	germline	loss	UniProt	VARIANT T -> P (in VSCN1; almost complete loss of ERBB2 and ERBB3 phosphorylation in the presence or in the absence of NRG1 stimulation, suggesting alteration of downstream signaling; does not affect the subcellular localization at the cell membrane)	33497358
P21860	ERBB3	V899M	V	899	M	593	germline	loss	UniProt	VARIANT V -> M (in VSCN1; almost complete loss of ERBB2 and ERBB3 phosphorylation in the presence or in the absence of NRG1 stimulation, suggesting alteration of downstream signaling; does not affect the subcellular localization at the cell membrane)	33497358
P21860	ERBB3	S1119C	S	1119	C	-	germline	neutral	gnomAD	AF=8.88284e-02, allele-count=22324, n-homozygotes=1153	32461654
P21860	ERBB3	A1337T	A	1337	T	-	tumor-predisposition	increase	UniProt	VARIANT A -> T (in FERLK; risk factor for erythroleukemia; results in increased ERBB-mediated signaling; results in a block of erythroid differentiation and increased cell proliferation; dbSNP:rs755855285)	27416908
Q15303	ERBB4	I947R	I	947	R	806	experimental	activating	UniProt	MUTAGEN I->R: Constitutively autophosphorylated.	18287036
Q15303	ERBB4	Q646C	Q	646	C	-	experimental	activating	UniProt+PubMed	MUTAGEN Q->C: Constitutively activated kinase.	17120616
Q15303	ERBB4	L710N	L	710	N	22	experimental	decrease	UniProt	MUTAGEN L->N: Strongly reduced autophosphorylation.	18287036
Q15303	ERBB4	M766R	M	766	R	147	experimental	decrease	UniProt	MUTAGEN M->R: Strongly reduced autophosphorylation.	18287036
Q15303	ERBB4	L864R	L	864	R	482	experimental	decrease	UniProt	MUTAGEN L->R: Strongly reduced autophosphorylation.	18287036
Q15303	ERBB4	K751R	K	751	R	96	experimental	loss	UniProt	MUTAGEN K->R: Abolishes kinase activity. Abolishes phosphorylation, proteolytic processing and nuclear localization.	11390655,17486069,17638867
Q15303	ERBB4	D843N	D	843	N	426	experimental	loss	UniProt	MUTAGEN D->N: Loss of kinase activity.	16978839
Q15303	ERBB4	D861Y	D	861	Y	479	experimental	loss	UniProt	MUTAGEN D->Y: Loss of kinase activity.	19098003
Q15303	ERBB4	Y1056A	Y	1056	A	-	experimental	loss	UniProt	MUTAGEN Y->A: Abolishes interaction with NEDD4 and impairs ubiquitination. Promotes nuclear translocation of ERBB4 intracellular domain E4ICD1.	19561640
Q15303	ERBB4	R927Q	R	927	Q	639	germline	decrease	UniProt	VARIANT R -> Q (in ALS19; reduces autophosphorylation upon NRG1 stimulation; dbSNP:rs397514262)	24119685
Q15303	ERBB4	R1275W	R	1275	W	-	germline	decrease	UniProt	VARIANT R -> W (in ALS19; reduces autophosphorylation upon NRG1 stimulation; dbSNP:rs397514263)	24119685
O75460	ERN1	Q105E	Q	105	E	-	experimental	decrease	UniProt	MUTAGEN Q->E: Impaired ability to homodimerize.	16973740
O75460	ERN1	K599A	K	599	A	96	experimental	loss	UniProt	MUTAGEN K->A: Loss of autophosphorylation and of endoribonuclease activity. Inhibition of growth arrest.	11175748,9637683
O75460	ERN1	D123P	D	123	P	-	experimental	loss	UniProt	MUTAGEN D->P: Abolishes ability to homodimerize.	16973740
O75460	ERN1	W125A	W	125	A	-	experimental	loss	UniProt	MUTAGEN W->A: Abolishes ability to homodimerize.	16973740
Q76MJ5	ERN2	K548A	K	548	A	96	experimental	loss	UniProt	MUTAGEN K->A: Loss of autophosphorylation, of induction of apoptosis and of 28S rRNA cleavage, attenuation of repression of protein synthesis.	11175748
Q76MJ5	ERN2	V69I	V	69	I	-	germline	neutral	gnomAD	AF=5.06982e-03, allele-count=1275, n-homozygotes=34	32461654
Q76MJ5	ERN2	S487T	S	487	T	-	germline	neutral	gnomAD	AF=3.11149e-01, allele-count=78091, n-homozygotes=13468	32461654
P16591	FER	R483Q	R	483	Q	-	experimental	loss	UniProt	MUTAGEN R->Q: Abolishes kinase activity. Abolishes location at microtubules.	12972546
P16591	FER	K591R	K	591	R	96	experimental	loss	UniProt	MUTAGEN K->R: Abolishes kinase activity.	9722593
P16591	FER	L439V	L	439	V	-	germline	neutral	gnomAD	AF=5.87110e-02, allele-count=14699, n-homozygotes=633	32461654
P07332	FES	L145P	L	145	P	-	experimental	activating	UniProt	MUTAGEN L->P: Constitutively activated kinase that can act as oncogene. Promotes myeloid cell survival and proliferation.	11509660,15485904
P07332	FES	M704V	M	704	V	482	experimental	decrease	UniProt	MUTAGEN M->V: Reduced autophosphorylation and strongly reduced kinase activity.	15867340,16455651
P07332	FES	Y713F	Y	713	F	507	experimental	decrease	UniProt	MUTAGEN Y->F: Reduces kinase activity by over 90%.	7687763
P07332	FES	V743M	V	743	M	588	experimental	decrease	UniProt	MUTAGEN V->M: Strongly reduced autophosphorylation and kinase activity.	15867340,16455651
P07332	FES	S759F	S	759	F	608	experimental	decrease	UniProt	MUTAGEN S->F: Reduced autophosphorylation and strongly reduced kinase activity.	15867340,16455651
P07332	FES	R483M	R	483	M	-	experimental	decrease	UniProt	MUTAGEN R->M: Abolishes pTyr binding. Abolishes association with microtubules. Abolishes autophosphorylation. Reduced kinase activity.	15485904,18775312
P07332	FES	L334P	L	334	P	-	experimental	loss	UniProt	MUTAGEN L->P: Abolishes autophosphorylation.	11509660
P07332	FES	G463V	G	463	V	-	experimental	loss	UniProt	MUTAGEN G->V: Abolishes kinase activity.	18775312
P07332	FES	K590E	K	590	E	96	experimental	loss	UniProt	MUTAGEN K->E: Abolishes kinase activity. Fails to inhibit proliferation of melanoma cells.	15485904,28463229
P07332	FES	M323V	M	323	V	-	germline	neutral	gnomAD	AF=4.13276e-03, allele-count=1038, n-homozygotes=27	32461654
P11362	FGFR1	R577E	R	577	E	257	experimental	decrease	UniProt	MUTAGEN R->E: Strongly reduced autophosphorylation in response to FGF signaling. No effect on in vitro kinase activity.	20133753
P11362	FGFR1	Y654F	Y	654	F	508	experimental	decrease	UniProt	MUTAGEN Y->F: Reduced kinase activity. Loss of autophosphorylation and kinase activity; when associated with F-653.	8622701
P11362	FGFR1	Y766F	Y	766	F	862	experimental	decrease	UniProt	MUTAGEN Y->F: Abolishes interaction with PLCG1 and SHB. Decreases phosphorylation of FRS2, activation of RAS and
P11362	FGFR1	K514A	K	514	A	96	experimental	loss	UniProt	MUTAGEN K->A: Loss of kinase activity.	15117958
P11362	FGFR1	D623A	D	623	A	426	experimental	loss	UniProt	MUTAGEN D->A: Loss of kinase activity.	19224897
P11362	FGFR1	K656E	K	656	E	525	germline	activating	PubMed	VARIANT constitutively-active	32187553,29683947,26942290
P11362	FGFR1	K618N	K	618	N	406	germline	decrease	UniProt	VARIANT K -> N (in HH2; some patients also carry GNRHR mutations; impairs tyrosine kinase activity)	19820032,23643382
P11362	FGFR1	Y374C	Y	374	C	-	germline	increase	UniProt	VARIANT Y -> C (in OGD; elevated basal activity and increased FGF2-mediated activity; dbSNP:rs121909631)	15625620
P11362	FGFR1	N546K	N	546	K	180	somatic	activating	UniProt	VARIANT N -> K (in ECCL; somatic mutation; activating mutation; strongly increased speed of the first autophosphorylation and loss of the normal sequential order of autophosphorylation; dbSNP:rs779707422)	1,922,489,726,942,290
P11362	FGFR1	N546K	N	546	K	180	somatic	resistance	COSMIC	-	-
P21802	FGFR2	E565A	E	565	A	234	experimental	activating	UniProt	MUTAGEN E->A: Constitutive kinase activity.	17803937
P21802	FGFR2	N549T	N	549	T	180	experimental	activating	UniProt	MUTAGEN N->T: Constitutive kinase activity.	17803937
P21802	FGFR2	Y769F	Y	769	F	862	experimental	decrease	UniProt	MUTAGEN Y->F: Increases fibroblast proliferation. Decreases phosphorylation of PLCG1 and FRS2. Decreases activation of
P21802	FGFR2	C278F	C	278	F	-	germline	activating	UniProt	VARIANT C -> F (in CS, JWS and PS; forms disulfide-linked dimers with constitutive kinase activity, is retained in an intracellular compartment and not detected at the cell surface; dbSNP:rs776587763)	11173845,11781872,16844695,8644708,9677057
P21802	FGFR2	E565G	E	565	G	234	germline	activating	UniProt	VARIANT E -> G (in PS; constitutive kinase activity; dbSNP:rs121918506)	11781872,17803937
P21802	FGFR2	K526E	K	526	E	120	germline	activating	UniProt	VARIANT K -> E (in FSPC; constitutive kinase activity; dbSNP:rs121918507)	16061565,17803937
P21802	FGFR2	K641R	K	641	R	476	germline	activating	UniProt	VARIANT K -> R (in PS; constitutive kinase activity; dbSNP:rs1057519047)	11781872,17803937
P21802	FGFR2	K659N	K	659	N	525	germline	activating	UniProt	VARIANT K -> N (in craniosynostosis; constitutive kinase activity; dbSNP:rs1589722765)	11781872,17803937
P21802	FGFR2	N549H	N	549	H	180	germline	activating	UniProt	VARIANT N -> H (in CS; constitutive kinase activity; dbSNP:rs1057519045)	11781872,17803937
P21802	FGFR2	C342Y	C	342	Y	-	germline	activating	PubMed	VARIANT constitutively-active	35651944,15781477
P21802	FGFR2	M391R	M	391	R	-	germline	decrease	UniProt	VARIANT M -> R (in BBDS1; the mutation selectively reduces plasma-membrane levels of the protein and markedly diminishes the receptor's responsiveness to extracellular FGF; dbSNP:rs387906677)	22387015
P21802	FGFR2	A628T	A	628	T	428	germline	decrease	UniProt	VARIANT A -> T (in LADD1; strongly reduced kinase activity; dbSNP:rs121918509)	16501574
P21802	FGFR2	M186T	M	186	T	-	germline	neutral	gnomAD	AF=4.54242e-02, allele-count=11423, n-homozygotes=1083	32461654
P21802	FGFR2	S57L	S	57	L	-	germline	neutral	gnomAD	AF=4.79569e-03, allele-count=1206, n-homozygotes=17	32461654
P21802	FGFR2	N549K	N	549	K	180	somatic	resistance	COSMIC	-	-
P21802	FGFR2	V395D	V	395	D	-	somatic	resistance	COSMIC	-	-
P21802	FGFR2	L617M	L	617	M	391	somatic	resistance	COSMIC	-	-
P21802	FGFR2	V564F	V	564	F	233	somatic	resistance	COSMIC	-	-
P21802	FGFR2	E565A	E	565	A	234	somatic	resistance	COSMIC	-	-
P21802	FGFR2	N549H	N	549	H	180	somatic	resistance	COSMIC	-	-
P21802	FGFR2	K659M	K	659	M	525	somatic	resistance	COSMIC	-	-
P21802	FGFR2	N549T	N	549	T	180	somatic	resistance	COSMIC	-	-
P21802	FGFR2	K641R	K	641	R	476	somatic	resistance	COSMIC	-	-
P21802	FGFR2	L617V	L	617	V	391	somatic	resistance	COSMIC	-	-
P21802	FGFR2	M537I	M	537	I	152	somatic	resistance	COSMIC	-	-
P22607	FGFR3	K650D	K	650	D	525	experimental	activating	UniProt	MUTAGEN K->D: Constitutively activated kinase.
P22607	FGFR3	K650L	K	650	L	525	experimental	activating	UniProt	MUTAGEN K->L: Constitutively activated kinase.
P22607	FGFR3	A391E	A	391	E	-	experimental	activating	PubMed	VARIANT constitutively-active	26244699,19165726
P22607	FGFR3	Y724F	Y	724	F	814	experimental	decrease	UniProt	MUTAGEN Y->F: Strongly reduced kinase activity. Strongly reduced mitogen activity.	11294897
P22607	FGFR3	Y577F	Y	577	F	263	experimental	increase	UniProt	MUTAGEN Y->F: Minor effect on kinase activity.	11294897
P22607	FGFR3	Y760F	Y	760	F	862	experimental	increase	UniProt	MUTAGEN Y->F: Minor effect on kinase activity.	11294897
P22607	FGFR3	Y770F	Y	770	F	872	experimental	increase	UniProt	MUTAGEN Y->F: Minor effect on kinase activity. Increased mitogen activity.	11294897
P22607	FGFR3	K508A	K	508	A	96	experimental	loss	UniProt	MUTAGEN K->A: Loss of kinase activity. Abolishes ubiquitination.	12297284,16410555
P22607	FGFR3	Y373C	Y	373	C	-	germline	activating	UniProt	VARIANT Y -> C (in KERSEB and TD1; disulfide-linked dimer with constitutive kinase activation; dbSNP:rs121913485)	10360402,15772091,17509076,8845844,9207791
P22607	FGFR3	K650M	K	650	M	525	germline	activating	UniProt	VARIANT K -> M (in KERSEB, ACH, TD1 and SADDAN; constitutively activated kinase with impaired internalization and degradation, resulting in prolonged FGFR3 signaling; dbSNP:rs121913105)	10053006,10671061,15772091,17509076,17561467,9207791
P22607	FGFR3	G375C	G	375	C	-	germline	activating	PubMed	VARIANT constitutively-active	31804721,12009017
P22607	FGFR3	F384L	F	384	L	-	germline	neutral	gnomAD	AF=3.28577e-03, allele-count=823, n-homozygotes=4	32461654
P22607	FGFR3	G382D	G	382	D	-	somatic	activating	PubMed	VARIANT constitutively-active	11429702,16467200
P22607	FGFR3	G380R	G	380	R	-	somatic/germline	activating	UniProt	VARIANT G -> R (in keratinocytic non-epidermolytic nevus and ACH; very common mutation; constitutively activated kinase with impaired internalization and degradation, resulting in prolonged FGFR3 signaling; dbSNP:rs28931614)	10611230,12297284,16841094,17561467,7847369,8078586,8599935
P22607	FGFR3	K650E	K	650	E	525	somatic/germline	activating	UniProt	VARIANT K -> E (in KERSEB, TD2, TGCT and BLC; bladder transitional cell carcinoma; somatic mutation; constitutively activated kinase with impaired internalization and degradation, resulting in prolonged FGFR3 signaling; dbSNP:rs78311289)	10471491,11294897,12297284,14534538,15772091,17145761,17344846,17561467,19855393,7773297,8754806,9207791
P22607	FGFR3	R248C	R	248	C	-	somatic/germline	activating	UniProt	VARIANT R -> C (in KERSEB, BLC, keratinocytic non-epidermolytic nevus and TD1; severe and lethal; also found as somatic mutation in one patient with multiple myeloma; constitutive dimerization and kinase activation; dbSNP:rs121913482)	10360402,10471491,11529856,15772091,16841094,17509076,7773297,8845844
P22607	FGFR3	K650Q	K	650	Q	525	somatic/germline	activating	UniProt	VARIANT K -> Q (in hypochondroplasia and BLC; in hypochondroplasia the form is milder than that seen in individuals with the K-540 or M-650 mutations; constitutively activated kinase; dbSNP:rs78311289)	11055896,11314002,8754806
P22455	FGFR4	Y754F	Y	754	F	861	experimental	decrease	UniProt	MUTAGEN Y->F: Loss of interaction with PLCG1.	7518429
P22455	FGFR4	K503R	K	503	R	96	experimental	loss	UniProt	MUTAGEN K->R: Loss of kinase activity.	11433297,17311277
P22455	FGFR4	P136L	P	136	L	-	germline	neutral	gnomAD	AF=0.199396, allele-count=201070, n-homozygotes=81471	32461654
P22455	FGFR4	T179A	T	179	A	-	germline	neutral	gnomAD	AF=2.75196e-03, allele-count=690, n-homozygotes=10	32461654
P22455	FGFR4	G388R	G	388	R	-	somatic	increase	UniProt	VARIANT G -> R (in cancer cells, may be associated with accelerated disease progression and increased tumor cell motility, possibly due to increased stability of the protease MMP14; leads to phosphorylation at residue Y-390, resulting in prolonged FGFR4 activity; increases interaction with STAT3, resulting in STAT3 phosphorylation and signaling activation.; dbSNP:rs351855)	18670643,18756523,20876804,21349172,21882254,26675719
P22455	FGFR4	V550L	V	550	L	233	somatic	resistance	COSMIC	-	-
P22455	FGFR4	V550M	V	550	M	233	somatic	resistance	COSMIC	-	-
P09769	FGR	Y523F	Y	523	F	861	experimental	increase	UniProt	MUTAGEN Y->F: Strongly increased catalytic activity. Functions as oncogene.	1737799
P17948	FLT1	Y914F	Y	914	F	239	experimental	decrease	UniProt	MUTAGEN Y->F: Reduces phosphorylation at other tyrosine residues.	9722576
P17948	FLT1	N1050D	N	1050	D	503	experimental	increase	UniProt	MUTAGEN N->D: Strongly increases kinase activity. Increases activity in promoting proliferation of endothelial cells.	16286478
P17948	FLT1	Y1242F	Y	1242	F	-	experimental	loss	UniProt	MUTAGEN Y->F: Loss of phosphorylation site.	9722576
P17948	FLT1	Y1327F	Y	1327	F	-	experimental	loss	UniProt	MUTAGEN Y->F: Loss of phosphorylation site.	9722576
P17948	FLT1	K861M	K	861	M	96	experimental	loss	UniProt	MUTAGEN K->M: Abolishes enzyme activity. Abolishes interaction with PLCG.	9299537
P17948	FLT1	M938V	M	938	V	270	germline	neutral	gnomAD	AF=2.91963e-03, allele-count=734, n-homozygotes=9	32461654
P17948	FLT1	E982A	E	982	A	346	germline	neutral	gnomAD	AF=3.37193e-03, allele-count=848, n-homozygotes=10	32461654
P36888	FLT3	Y589F	Y	589	F	10	experimental	decrease	UniProt	MUTAGEN Y->F: Reduced phosphorylation of the wild-type kinase in response to ligand binding. No effect on the phosphorylation of the constitutively activated mutant kinase variants. Abolishes activation of STAT5A.	16627759,16684964,9737679
P36888	FLT3	Y591F	Y	591	F	12	experimental	decrease	UniProt	MUTAGEN Y->F: No significant effect on tyrosine phosphorylation. Abolishes activation of STAT5A.	166,277,599,737,679
P36888	FLT3	Y599F	Y	599	F	20	experimental	decrease	UniProt	MUTAGEN Y->F: Abolishes interaction with PTPN11/SHP2 and phosphorylation of PTPN11/SHP2.	16684964
P36888	FLT3	K644A	K	644	A	96	experimental	loss	UniProt	MUTAGEN K->A: Abolishes kinase activity.	15831474
P36888	FLT3	D7G	D	7	G	-	germline	neutral	gnomAD	AF=2.50000e-01, allele-count=78, n-homozygotes=7	32461654
P36888	FLT3	T227M	T	227	M	-	germline	neutral	gnomAD	AF=0.395105, allele-count=152050, n-homozygotes=46973	32461654
P36888	FLT3	D324N	D	324	N	-	germline	neutral	gnomAD	AF=1.72187e-02, allele-count=4328, n-homozygotes=59	32461654
P36888	FLT3	V557I	V	557	I	-	germline	neutral	gnomAD	AF=1.27508e-02, allele-count=3206, n-homozygotes=216	32461654
P36888	FLT3	V194M	V	194	M	-	germline	neutral	gnomAD	AF=5.01047e-03, allele-count=1259, n-homozygotes=6	32461654
P36888	FLT3	I417L	I	417	L	-	germline	neutral	gnomAD	AF=2.61003e-03, allele-count=656, n-homozygotes=11	32461654
P36888	FLT3	D835E	D	835	E	491	somatic	activating	UniProt	VARIANT D -> E (in acute lymphoblastic leukemia patients and acute myelogenous leukemia patients; somatic mutation; constitutively activated; dbSNP:rs121913487)	11290608,14504097
P36888	FLT3	D835H	D	835	H	491	somatic	activating	UniProt	VARIANT D -> H (in acute lymphoblastic leukemia patients and in acute myelogenous leukemia patients; somatic mutation; constitutively activated; dbSNP:rs121913488)	11290608,11442493,14504097
P36888	FLT3	D835N	D	835	N	491	somatic	activating	UniProt	VARIANT D -> N (in acute lymphoblastic leukemia patients and in acute myelogenous leukemia patients; somatic mutation; constitutively activated; dbSNP:rs121913488)	11290608
P36888	FLT3	D835V	D	835	V	491	somatic	activating	UniProt	VARIANT D -> V (in acute lymphoblastic leukemia patients and in acute myelogenous leukemia patients; somatic mutation; constitutively activated; dbSNP:rs121909646)	11290608
P36888	FLT3	D835Y	D	835	Y	491	somatic	activating	UniProt	VARIANT D -> Y (in acute lymphoblastic leukemia patients and in acute myelogenous leukemia patients; somatic mutation; constitutively activated; dbSNP:rs121913488)	11290608,11442493,14504097
P36888	FLT3	F691L	F	691	L	233	somatic	resistance	COSMIC	-	-
P36888	FLT3	D835H	D	835	H	491	somatic	resistance	COSMIC	-	-
P36888	FLT3	D835V	D	835	V	491	somatic	resistance	COSMIC	-	-
P36888	FLT3	D835Y	D	835	Y	491	somatic	resistance	COSMIC	-	-
P36888	FLT3	D835I	D	835	I	491	somatic	resistance	COSMIC	-	-
P35916	FLT4	Y1230F	Y	1230	F	-	experimental	decrease	UniProt	MUTAGEN Y->F: Loss of phosphorylation site. Strongly reduces stimulation of cell proliferation and cell migration.	12881528,16076871
P35916	FLT4	Y1231F	Y	1231	F	-	experimental	decrease	UniProt	MUTAGEN Y->F: Loss of phosphorylation site. Strongly reduces stimulation of cell proliferation and cell migration.	12881528,16076871
P35916	FLT4	Y1333F	Y	1333	F	-	experimental	decrease	UniProt	MUTAGEN Y->F: Loss of phosphorylation site. Reduced autophosphorylation.	12881528,7675451
P35916	FLT4	Y1337F	Y	1337	F	-	experimental	decrease	UniProt	MUTAGEN Y->F: Reduced autophosphorylation. Strongly reduces stimulation of cell proliferation and cell migration.	12881528,20431062,7675451
P35916	FLT4	Y1363F	Y	1363	F	-	experimental	decrease	UniProt	MUTAGEN Y->F: Loss of phosphorylation site. Slightly reduced autophosphorylation.	12881528,7675451
P35916	FLT4	K879G	K	879	G	96	experimental	loss	UniProt	MUTAGEN K->G: Abolishes enzyme activity.	12881528
P35916	FLT4	Y1068F	Y	1068	F	508	experimental	loss	UniProt	MUTAGEN Y->F: Global loss of autophosphorylation. Abolishes stimulation of cell proliferation and cell migration.	16076871,20431062
P35916	FLT4	A855T	A	855	T	41	germline	decrease	UniProt	VARIANT A -> T (in LMPHM1; recessive form; results in reduced autophosphorylation; results in impaired ligand-induced receptor internalization and downstream signaling; dbSNP:rs121909657)	19289394
P35916	FLT4	G857R	G	857	R	43	germline	loss	UniProt	VARIANT G -> R (in LMPHM1; loss of kinase activity; dbSNP:rs267606818)	10835628,15102829
P35916	FLT4	H1035R	H	1035	R	423	germline	loss	UniProt	VARIANT H -> R (in LMPHM1; loss of kinase activity; dbSNP:rs121909653)	10856194
P35916	FLT4	R1041P	R	1041	P	430	germline	loss	UniProt	VARIANT R -> P (in LMPHM1; loss of kinase activity; dbSNP:rs121909650)	10835628,12881528
P35916	FLT4	L1044P	L	1044	P	433	germline	loss	UniProt	VARIANT L -> P (in LMPHM1; loss of kinase activity; dbSNP:rs121909651)	10835628
P35916	FLT4	P1114L	P	1114	L	610	germline	loss	UniProt	VARIANT P -> L (in LMPHM1; loss of kinase activity; dbSNP:rs121909652)	10835628,9817924
P35916	FLT4	T494A	T	494	A	-	germline	neutral	gnomAD	AF=8.86185e-02, allele-count=22186, n-homozygotes=1241	32461654
P35916	FLT4	P641S	P	641	S	-	germline	neutral	gnomAD	AF=3.80599e-03, allele-count=933, n-homozygotes=3	32461654
P35916	FLT4	H890Q	H	890	Q	143	germline	neutral	gnomAD	AF=0.369963, allele-count=153516, n-homozygotes=49194	32461654
P35916	FLT4	R1146H	R	1146	H	816	germline	neutral	gnomAD	AF=7.47722e-02, allele-count=18772, n-homozygotes=970	32461654
P35916	FLT4	N527S	N	527	S	-	germline	neutral	gnomAD	AF=5.91244e-03, allele-count=1482, n-homozygotes=57	32461654
P35916	FLT4	N149D	N	149	D	-	germline	neutral	gnomAD	AF=7.37674e-02, allele-count=18397, n-homozygotes=910	32461654
P42685	FRK	K262R	K	262	R	96	experimental	loss	UniProt	MUTAGEN K->R: Loss of ability to phosphorylate PTEN.	19345329
P42685	FRK	G122R	G	122	R	-	germline	neutral	gnomAD	AF=4.56106e-01, allele-count=114228, n-homozygotes=28084	32461654
P42685	FRK	S133L	S	133	L	-	germline	neutral	gnomAD	AF=8.37272e-03, allele-count=2101, n-homozygotes=17	32461654
P06241	FYN	Y531F	Y	531	F	861	experimental	activating	PubMed+PubMed	VARIANT constitutively-active	24860422,15713745
P06241	FYN	D506E	D	506	E	826	germline	neutral	gnomAD	AF=9.13046e-03, allele-count=2296, n-homozygotes=25	32461654
O14976	GAK	D787Y	D	787	Y	-	germline	neutral	gnomAD	AF=8.95361e-03, allele-count=2114, n-homozygotes=11	32461654
O14976	GAK	Q877R	Q	877	R	-	germline	neutral	gnomAD	AF=1.10719e-03, allele-count=275, n-homozygotes=3	32461654
O14976	GAK	K1265R	K	1265	R	-	germline	neutral	gnomAD	AF=4.30536e-02, allele-count=10570, n-homozygotes=312	32461654
O14976	GAK	D1297N	D	1297	N	-	germline	neutral	gnomAD	AF=1.27416e-01, allele-count=31750, n-homozygotes=2527	32461654
Q15835	GRK1	K219A	K	219	A	96	experimental	loss	UniProt	MUTAGEN K->A: Loss of autophosphorylation and RHO phosphorylation.	15946941
P25098	GRK2	D3A	D	3	A	-	experimental	decrease	UniProt	MUTAGEN D->A: 85% reduction in phosphorylation of G-protein coupled receptor rhodopsin.	19715378
P25098	GRK2	D3N	D	3	N	-	experimental	decrease	UniProt	MUTAGEN D->N: 60% reduction in phosphorylation of G-protein coupled receptor rhodopsin.	19715378
P25098	GRK2	L4K	L	4	K	-	experimental	decrease	UniProt	MUTAGEN L->K: 95% reduction in phosphorylation of G-protein coupled receptor rhodopsin.	19715378
P25098	GRK2	E5A	E	5	A	-	experimental	decrease	UniProt	MUTAGEN E->A: 50% reduction in phosphorylation of G-protein coupled receptor rhodopsin.	19715378
P25098	GRK2	D3K	D	3	K	-	experimental	decrease	UniProt	MUTAGEN D->K: 95% reduction in phosphorylation of G-protein coupled receptor rhodopsin. 60% reduction in phosphorylation of beta-2 adrenergic receptor ADRB2. Does not affect binding to ADRB2. Not activated by receptor binding. No effect on phosphorylation of the non-receptor substrate tubulin.	19715378
P25098	GRK2	L4A	L	4	A	-	experimental	decrease	UniProt	MUTAGEN L->A: 95% reduction in phosphorylation of G-protein coupled receptor rhodopsin. 90% reduction in phosphorylation of beta-2 adrenergic receptor ADRB2. Does not affect binding to ADRB2. Not activated by receptor binding. No effect on phosphorylation of the non-receptor substrate tubulin.	19715378
P25098	GRK2	D10A	D	10	A	-	experimental	decrease	UniProt	MUTAGEN D->A: 95% reduction in phosphorylation of G-protein coupled receptor rhodopsin and beta-2 adrenergic receptor ADRB2. Does not affect binding to ADRB2. Not activated by receptor binding. No effect on phosphorylation of the non-receptor substrate tubulin.	19715378
P25098	GRK2	K220R	K	220	R	96	germline	loss	UniProt	Loss of activity.	9892019
P32298	GRK4	R65L	R	65	L	-	germline	neutral	gnomAD	AF=3.22324e-01, allele-count=81000, n-homozygotes=14383	32461654
P32298	GRK4	A142V	A	142	V	-	germline	neutral	gnomAD	AF=3.63788e-01, allele-count=91329, n-homozygotes=18223	32461654
P32298	GRK4	V486A	V	486	A	-	germline	neutral	gnomAD	AF=0.379335, allele-count=156019, n-homozygotes=49592	32461654
P32298	GRK4	A116T	A	116	T	-	germline	neutral	gnomAD	AF=2.30273e-02, allele-count=5787, n-homozygotes=110	32461654
P34947	GRK5	K215R	K	215	R	96	experimental	decrease	UniProt	MUTAGEN K->R: Failed to phosphorylate p53/TP53.	20124405
P34947	GRK5	Q41L	Q	41	L	-	germline	neutral	gnomAD	AF=3.75289e-02, allele-count=9435, n-homozygotes=709	32461654
P34947	GRK5	A119V	A	119	V	-	germline	neutral	gnomAD	AF=6.73348e-03, allele-count=1693, n-homozygotes=5	32461654
P34947	GRK5	L141I	L	141	I	-	germline	neutral	gnomAD	AF=1.02205e-03, allele-count=257, n-homozygotes=3	32461654
P34947	GRK5	R304H	R	304	H	402	germline	neutral	gnomAD	AF=1.08543e-01, allele-count=26723, n-homozygotes=1840	32461654
P43250	GRK6	N9A	N	9	A	-	experimental	loss	UniProt	MUTAGEN N->A: 140-fold defects in kinase activity.	20729810
P43250	GRK6	L12A	L	12	A	-	experimental	loss	UniProt	MUTAGEN L->A: 1100-fold defects in kinase activity.	20729810
Q8WTQ7	GRK7	S115C	S	115	C	-	germline	neutral	gnomAD	AF=2.04911e-02, allele-count=5074, n-homozygotes=156	32461654
Q8WTQ7	GRK7	E309Q	E	309	Q	402	germline	neutral	gnomAD	AF=3.94947e-03, allele-count=993, n-homozygotes=5	32461654
P49841	GSK3B	S9A	S	9	A	-	experimental	activating	UniProt	MUTAGEN S->A: Loss of phosphorylation; abolished inhibition of activity, leading to constitutively active.	17050006,28992046,7980435
P49841	GSK3B	L128A	L	128	A	229	experimental	loss	UniProt	MUTAGEN L->A: Abolishes activity toward AXIN1.	11430833
P49841	GSK3B	R96A	R	96	A	148	experimental	loss	UniProt	MUTAGEN R->A: Prevents the phosphorylation of phosphate-primed glycogen synthase.	11430833
P25092	GUCY2C	D387G	D	387	G	-	germline	decrease	UniProt	VARIANT D -> G (in MECIL; activation of guanylate cyclase activity is 60% lower than in wild-type; dbSNP:rs587776905)	22521417
P25092	GUCY2C	S840I	S	840	I	-	germline	increase	UniProt	VARIANT S -> I (in DIAR6; activating mutation; exposure of the mutant receptor to its ligands results in markedly increased production of cyclic guanosine monophosphate; dbSNP:rs587776871)	22436048
P25092	GUCY2C	R114Q	R	114	Q	-	germline	neutral	gnomAD	AF=2.08335e-03, allele-count=522, n-homozygotes=3	32461654
Q02846	GUCY2D	R822P	R	822	P	872	experimental	decrease	UniProt	MUTAGEN R->P: Fails to become activated by GUCA1A and by GUCA1B. Does not affect the binding to RP3.	26100624
Q02846	GUCY2D	M823R	M	823	R	873	experimental	decrease	UniProt	MUTAGEN M->R: Fails to become activated by GUCA1A and by GUCA1B. Does not affect the binding to RP3.	26100624
Q02846	GUCY2D	V902L	V	902	L	-	germline	increase	UniProt	VARIANT V -> L (in LCA1; increases basal and GUCA1A-induced guanylate cyclase activity; inhibition by RD3 is less effective; does not affect endoplasmic reticulum membrane localization; dbSNP:rs1598150793)	30319355
Q02846	GUCY2D	F565S	F	565	S	19	germline	loss	UniProt	VARIANT F -> S (in LCA1; loss of activity; dbSNP:rs61749755)	9888789
Q02846	GUCY2D	A710V	A	710	V	542	germline	loss	UniProt	VARIANT A -> V (in LCA1; loss of basal and GUCA1A-induced guanylate cyclase activity; does not affect endoplasmic reticulum membrane localization; dbSNP:rs781725943)	27475985,30319355
Q02846	GUCY2D	P873R	P	873	R	-	germline	loss	UniProt	VARIANT P -> R (in CORD6; loss basal and GUCA1A-induced guanylate cyclase activity; does not affect endoplasmic reticulum membrane localization; dbSNP:rs1567961680)	30319355
Q02846	GUCY2D	P701S	P	701	S	528	germline	neutral	gnomAD	AF=5.26963e-02, allele-count=13104, n-homozygotes=683	32461654
Q02846	GUCY2D	L782H	L	782	H	816	germline	neutral	gnomAD	AF=1.22777e-01, allele-count=30853, n-homozygotes=2799	32461654
Q02846	GUCY2D	W21R	W	21	R	-	germline	neutral	gnomAD	AF=4.79836e-02, allele-count=5516, n-homozygotes=258	32461654
P51841	GUCY2F	L284P	L	284	P	-	germline	neutral	gnomAD	AF=2.98453e-01, allele-count=54728, n-homozygotes=6221	32461654
P51841	GUCY2F	R296Q	R	296	Q	-	germline	neutral	gnomAD	AF=0.115082, allele-count=162324, n-homozygotes=45718	32461654
P51841	GUCY2F	Y308C	Y	308	C	-	germline	neutral	gnomAD	AF=2.63230e-03, allele-count=483, n-homozygotes=9	32461654
P51841	GUCY2F	Q380H	Q	380	H	-	germline	neutral	gnomAD	AF=1.70710e-02, allele-count=3113, n-homozygotes=119	32461654
P51841	GUCY2F	R628Q	R	628	Q	239	germline	neutral	gnomAD	AF=6.09396e-03, allele-count=1115, n-homozygotes=9	32461654
P51841	GUCY2F	S40C	S	40	C	-	germline	neutral	gnomAD	AF=2.07475e-03, allele-count=380, n-homozygotes=3	32461654
P51841	GUCY2F	I160N	I	160	N	-	germline	neutral	gnomAD	AF=1.16139e-02, allele-count=2122, n-homozygotes=31	32461654
P51841	GUCY2F	R230W	R	230	W	-	germline	neutral	gnomAD	AF=1.02791e-02, allele-count=1864, n-homozygotes=25	32461654
P51841	GUCY2F	V677L	V	677	L	433	germline	neutral	gnomAD	AF=9.38560e-03, allele-count=1708, n-homozygotes=35	32461654
P51841	GUCY2F	E794K	E	794	K	825	germline	neutral	gnomAD	AF=3.69821e-03, allele-count=676, n-homozygotes=2	32461654
Q8TF76	HASPIN	E492A	E	492	A	39	experimental	decrease	UniProt	MUTAGEN E->A: Markedly reduced affinity for histone H3 and reduced histone H3 phosphorylation.	19918049
Q8TF76	HASPIN	K511A	K	511	A	96	experimental	decrease	UniProt	MUTAGEN K->A: Strongly reduced enzyme activity.	19918057
Q8TF76	HASPIN	H651A	H	651	A	428	experimental	decrease	UniProt	MUTAGEN H->A: Strongly reduced enzyme activity, markedly reduced affinity for histone H3.	19918049,19918057
Q8TF76	HASPIN	D707L	D	707	L	-	experimental	decrease	UniProt	MUTAGEN D->L: Markedly reduced affinity for histone H3 and reduced histone H3 phosphorylation.	19918049
Q8TF76	HASPIN	D709N	D	709	N	-	experimental	decrease	UniProt	MUTAGEN D->N: Markedly reduced affinity for histone H3 and reduced histone H3 phosphorylation.	19918049
Q8TF76	HASPIN	G713F	G	713	F	-	experimental	decrease	UniProt	MUTAGEN G->F: Markedly reduced affinity for histone H3 and reduced histone H3 phosphorylation.	19918049
Q8TF76	HASPIN	D716L	D	716	L	-	experimental	decrease	UniProt	MUTAGEN D->L: Markedly reduced histone H3 phosphorylation.	19918049
P08631	HCK	Y522F	Y	522	F	862	experimental	activating	UniProt	MUTAGEN Y->F: Constitutively activated kinase, leading to cellular transformation.	10092522,11896602
P08631	HCK	Y411A	Y	411	A	508	experimental	decrease	UniProt	MUTAGEN Y->A: Reduced catalytic activity and higher affinity for target peptides.	10644735
P08631	HCK	K290E	K	290	E	96	experimental	loss	UniProt	MUTAGEN K->E: Loss of kinase activity.	11896602
P08631	HCK	E305A	E	305	A	149	experimental	loss	UniProt	MUTAGEN E->A: Loss of kinase activity.	10644735
P08631	HCK	D381E	D	381	E	426	experimental	loss	UniProt	MUTAGEN D->E: Loss of kinase activity.	15998323
P08631	HCK	A44T	A	44	T	-	germline	neutral	gnomAD	AF=3.19465e-03, allele-count=803, n-homozygotes=4	32461654
P08631	HCK	M105L	M	105	L	-	germline	neutral	gnomAD	AF=1.50197e-02, allele-count=2411, n-homozygotes=28	32461654
Q86Z02	HIPK1	K219A	K	219	A	96	experimental	loss	UniProt	MUTAGEN K->A: Loss of kinase activity.	19646965
Q86Z02	HIPK1	D315N	D	315	N	426	experimental	loss	UniProt	MUTAGEN D->N: Loss of kinase activity and impaired MAP3K5-JNK inactivation.	15701637
Q9H2X6	HIPK2	K228A	K	228	A	96	experimental	loss	UniProt	MUTAGEN K->A: Locates in the nucleoplasm, no effect on interaction with RANBP9, but loss of kinase activity toward PML, RUNX1, EP300 and DAZAP2.	11267674,11740489,11925430,12220523,12874272,12907596,14678985,18695000,19015637,33591310
Q9H2X6	HIPK2	K228R	K	228	R	96	experimental	loss	UniProt	MUTAGEN K->R: Abolishes enzymatic activity, no effect on interaction with TP53 and TP73 or on BMP-induced transcriptional activation. Enhances BMP-induced transcriptional activation; when associated with 359-AAF-361.	11267674,11740489,11925430,12220523,12874272,12907596,14678985,18695000,19015637
Q9H422	HIPK3	K226R	K	226	R	96	experimental	loss	UniProt	MUTAGEN K->R: Loss of kinase activity and impaired activation of SF1.	17210646
Q9H422	HIPK3	G170E	G	170	E	4	germline	neutral	gnomAD	AF=5.14324e-03, allele-count=1293, n-homozygotes=12	32461654
Q9H422	HIPK3	S500N	S	500	N	816	germline	neutral	gnomAD	AF=2.26432e-03, allele-count=569, n-homozygotes=8	32461654
Q9H422	HIPK3	V474I	V	474	I	781	germline	neutral	gnomAD	AF=3.75472e-03, allele-count=941, n-homozygotes=28	32461654
Q8NE63	HIPK4	R302Q	R	302	Q	787	germline	neutral	gnomAD	AF=9.08733e-02, allele-count=22373, n-homozygotes=1300	32461654
Q8NE63	HIPK4	T381M	T	381	M	-	germline	neutral	gnomAD	AF=1.36509e-03, allele-count=341, n-homozygotes=3	32461654
Q8NE63	HIPK4	A386T	A	386	T	-	germline	neutral	gnomAD	AF=3.43158e-02, allele-count=8567, n-homozygotes=928	32461654
Q8NE63	HIPK4	S406R	S	406	R	-	germline	neutral	gnomAD	AF=6.52926e-03, allele-count=1639, n-homozygotes=35	32461654
Q8NE63	HIPK4	G421S	G	421	S	-	germline	neutral	gnomAD	AF=1.32951e-03, allele-count=334, n-homozygotes=3	32461654
P57058	HUNK	R591C	R	591	C	-	germline	neutral	gnomAD	AF=2.27765e-01, allele-count=57216, n-homozygotes=7039	32461654
P08069	IGF1R	Y980F	Y	980	F	12	experimental	decrease	UniProt	MUTAGEN Y->F: Reduces tyrosine phosphorylation. Abolishes interaction with IRS1 and SHC1. Does not abolish interaction with PIK3R1, nor with GRB10.	104,545,687,541,045
P08069	IGF1R	K1033A	K	1033	A	96	experimental	loss	UniProt	MUTAGEN K->A: Kinase inactive. Abolishes tyrosine phosphorylation and abolishes interaction with IRS1, SHC1 and PIK3R1.	7541045
P08069	IGF1R	R138Q	R	138	Q	-	germline	decrease	UniProt	VARIANT R -> Q (in IGF1RES; has decreased IGF1R function; dbSNP:rs121912426)	14657428
P08069	IGF1R	K145N	K	145	N	-	germline	decrease	UniProt	VARIANT K -> N (in IGF1RES; has decreased IGF1R function; dbSNP:rs121912427)	14657428
P08069	IGF1R	N359Y	N	359	Y	-	germline	decrease	UniProt	VARIANT N -> Y (in IGF1RES; significant decrease in IGF1-induced DNA synthesis and AKT1 phosphorylation in patient fibroblasts)	25040157
P08069	IGF1R	Y865C	Y	865	C	-	germline	decrease	UniProt	VARIANT Y -> C (in IGF1RES; significant decrease in IGF1-induced DNA synthesis and AKT1 phosphorylation in patient fibroblasts)	25040157
P08069	IGF1R	R1256S	R	1256	S	832	germline	decrease	UniProt	VARIANT R -> S (in IGF1RES; significant decrease in IGF1-induced DNA synthesis and AKT1 phosphorylation in patient fibroblasts)	25040157
P08069	IGF1R	R437H	R	437	H	-	germline	neutral	gnomAD	AF=3.14408e-03, allele-count=790, n-homozygotes=2	32461654
P08069	IGF1R	N857S	N	857	S	-	germline	neutral	gnomAD	AF=2.13922e-03, allele-count=538, n-homozygotes=5	32461654
O14920	IKBKB	S177E	S	177	E	504	experimental	activating	UniProt	MUTAGEN S->E: Full activation. Interaction with TRIM21 is enhanced; when associated with E-181. Monoubiquitinated; when associated with R-163 and E-181. Strongly promoted NF-kappa-B gene expression; when associated with E-181.	196,750,999,346,484
O14920	IKBKB	S181E	S	181	E	529	experimental	activating	UniProt	MUTAGEN S->E: Full activation. Interaction with TRIM21 is enhanced; when associated with E-177. Monoubiquitinated; when associated with R-163 and E-177. Strongly promoted NF-kappa-B gene expression; when associated with E-177.	196,750,999,346,484
O14920	IKBKB	S177A	S	177	A	504	experimental	decrease	UniProt	MUTAGEN S->A: Decrease of activity.	19675099,9346484
O14920	IKBKB	S181A	S	181	A	529	experimental	decrease	UniProt	MUTAGEN S->A: Decrease of activity.	19675099,9346484
O14920	IKBKB	K171E	K	171	E	485	experimental	increase	UniProt	MUTAGEN K->E: Increased activation of NF-kappa-B signaling.	30337470
O14920	IKBKB	D166A	D	166	A	479	experimental	loss	UniProt	MUTAGEN D->A: Loss of protein kinase activity.	25326418
O14920	IKBKB	K44A	K	44	A	96	experimental	loss	UniProt	MUTAGEN K->A: Loss of kinase activity and no effect on binding to NIK.	93,464,849,346,485
O14920	IKBKB	V203I	V	203	I	585	germline	increase	UniProt	VARIANT V -> I (in IMD15A; gain-of-function mutation resulting in increased activation of NF-kappa-B signaling pathway; dbSNP:rs1563340753)	30337470
Q14164	IKBKE	E168A	E	168	A	504	experimental	decrease	UniProt	MUTAGEN E->A: Slight decrease of kinase activity.	10421793
Q14164	IKBKE	S172E	S	172	E	529	experimental	decrease	UniProt	MUTAGEN S->E: Decrease in kinase activity.	10421793
Q14164	IKBKE	K30A	K	30	A	76	experimental	decrease	UniProt	MUTAGEN K->A: Loss of ubiquitination and decreased kinase activity. No effect on homodimerization.	23453969
Q14164	IKBKE	K30R	K	30	R	76	experimental	decrease	UniProt	MUTAGEN K->R: Loss of ubiquitination and decreased kinase activity. Decreases interaction with IKBKB, IKBKG and MYD88. No effect on homodimerization.	23453969
Q14164	IKBKE	K401A	K	401	A	-	experimental	decrease	UniProt	MUTAGEN K->A: Loss of ubiquitination and decreased kinase activity. No effect on homodimerization.	23453969
Q14164	IKBKE	K401R	K	401	R	-	experimental	decrease	UniProt	MUTAGEN K->R: Loss of ubiquitination and decreased kinase activity. Decreases interaction with IKBKB, IKBKG and MYD88. No effect on homodimerization.	23453969
Q14164	IKBKE	K38A	K	38	A	96	experimental	loss	UniProt	MUTAGEN K->A: Loss of kinase activity and loss of nuclear import.	10421793
Q14164	IKBKE	S172A	S	172	A	529	experimental	loss	UniProt	MUTAGEN S->A: Loss of autophosphorylation and of kinase activity.	10421793
Q14164	IKBKE	P713L	P	713	L	-	germline	neutral	gnomAD	AF=1.99333e-01, allele-count=50019, n-homozygotes=5597	32461654
Q14164	IKBKE	A371T	A	371	T	-	germline	neutral	gnomAD	AF=2.08705e-02, allele-count=5238, n-homozygotes=113	32461654
Q14164	IKBKE	E515D	E	515	D	-	germline	neutral	gnomAD	AF=1.45573e-03, allele-count=366, n-homozygotes=6	32461654
Q14164	IKBKE	I543M	I	543	M	-	germline	neutral	gnomAD	AF=1.82965e-03, allele-count=459, n-homozygotes=2	32461654
Q14164	IKBKE	A602V	A	602	V	-	germline	neutral	gnomAD	AF=1.00694e-01, allele-count=25320, n-homozygotes=3762	32461654
Q14164	IKBKE	T483M	T	483	M	-	germline	neutral	gnomAD	AF=1.40791e-03, allele-count=354, n-homozygotes=3	32461654
Q13418	ILK	S343D	S	343	D	491	experimental	activating	PubMed	VARIANT constitutively-active	24260102,17088456
Q13418	ILK	E359K	E	359	K	544	experimental	loss	UniProt	MUTAGEN E->K: Inactivation of ILK.	9736715
P06213	INSR	Y1011A	Y	1011	A	19	experimental	increase	UniProt	MUTAGEN Y->A: Increases kinase activity.	12707268
P06213	INSR	K1057M	K	1057	M	96	experimental	loss	UniProt	MUTAGEN K->M,R: Abolishes the kinase activity.	10803466,3101064,7537849
P06213	INSR	D1159N	D	1159	N	426	experimental	loss	UniProt	MUTAGEN D->N: Loss of kinase activity.	11598120
P06213	INSR	R1163Q	R	1163	Q	430	experimental	loss	UniProt	MUTAGEN R->Q: Loss of kinase activity.	11598120
P06213	INSR	Y999F	Y	999	F	7	experimental	loss	UniProt	MUTAGEN Y->F: Has no effect on insulin-stimulated autophosphorylation, but inhibits the biological activity of the receptor. Abolishes interaction with IRS1 and almost completely prevents interaction with SHC1. Has no effect on interaction with PIK3R1. Abolishes interaction with STAT5B.	2842060,7537849,7559478,9428692
P06213	INSR	K1057A	K	1057	A	96	experimental	loss	UniProt	MUTAGEN K->A: Abolishes the kinase activity and abolishes interaction with IRS1, SHC1, GRB7 and PIK3R1.	10803466,3101064,7537849
P06213	INSR	K1057R	K	1057	R	96	experimental	loss	UniProt	MUTAGEN K->M,R: Abolishes the kinase activity.	10803466,3101064,7537849
P06213	INSR	E1206D	E	1206	D	544	germline	decrease	UniProt	VARIANT E -> D (in IRAN type A; accelerates degradation of the protein and impairs kinase activity)	7983039
P06213	INSR	W1220L	W	1220	L	589	germline	decrease	UniProt	VARIANT W -> L (in IRAN type A; accelerates degradation of the protein and impairs kinase activity; dbSNP:rs52800171)	7983039,8390949
P06213	INSR	I56T	I	56	T	-	germline	decrease	UniProt	VARIANT I -> T (in LEPRCH; abolishes post-translational processing; dbSNP:rs1555689937)	24498630
P06213	INSR	G58R	G	58	R	-	germline	decrease	UniProt	VARIANT G -> R (in LEPRCH; Helmond; inhibits processing and transport; dbSNP:rs52836744)	1730625
P06213	INSR	A119V	A	119	V	-	germline	decrease	UniProt	VARIANT A -> V (in LEPRCH; markedly impairs insulin binding; dbSNP:rs1347473020)	12023989
P06213	INSR	L120Q	L	120	Q	-	germline	decrease	UniProt	VARIANT L -> Q (in LEPRCH; inhibits receptor processing)	12970295
P06213	INSR	N458D	N	458	D	-	germline	decrease	UniProt	VARIANT N -> D (in LEPRCH; partially inhibits receptor processing and autophosphorylation; strongly impairs ERK phosphorylation; induces wild-type levels of IRS-1 phosphorylation; dbSNP:rs121913160)	12970295
P06213	INSR	V657F	V	657	F	-	germline	decrease	UniProt	VARIANT V -> F (in LEPRCH; impairs post-translational processing; dbSNP:rs1135401737)	28765322
P06213	INSR	W659R	W	659	R	-	germline	decrease	UniProt	VARIANT W -> R (in LEPRCH; impairs post-translational processing)	28765322
P06213	INSR	Y818C	Y	818	C	-	germline	decrease	UniProt	VARIANT Y -> C (in LEPRCH; abolishes post-translational processing)	22768670,28765322
P06213	INSR	R926W	R	926	W	-	germline	decrease	UniProt	VARIANT R -> W (in LEPRCH; markedly impairs insulin binding;impairs post-translational processing; dbSNP:rs911929963)	12023989,28765322
P06213	INSR	T937M	T	937	M	-	germline	decrease	UniProt	VARIANT T -> M (in LEPRCH; impaired receptor processing; impairs post-translational processing)	287,653,229,299,395
P06213	INSR	I1143T	I	1143	T	381	germline	decrease	UniProt	VARIANT I -> T (in RMS; reduces insulin binding)	10443650,12023989
P06213	INSR	R113P	R	113	P	-	germline	loss	UniProt	VARIANT R -> P (in LEPRCH; Atlanta-1; abolishes insulin binding; dbSNP:rs121913153)	120,239,898,419,945
P06213	INSR	I925T	I	925	T	-	germline	loss	UniProt	VARIANT I -> T (in LEPRCH; abolishes post-translational processing; abolishes insulin binding; dbSNP:rs1599881881)	12023989,28765322
P06213	INSR	R1158W	R	1158	W	424	germline	loss	UniProt	VARIANT R -> W (in RMS; abolishes insulin binding; dbSNP:rs111993466)	10443650,12023989
P06213	INSR	V1012M	V	1012	M	20	germline	neutral	gnomAD	AF=8.41464e-03, allele-count=2113, n-homozygotes=18	32461654
P14616	INSRR	R244H	R	244	H	-	germline	neutral	gnomAD	AF=1.14219e-03, allele-count=283, n-homozygotes=3	32461654
P14616	INSRR	P928L	P	928	L	-	germline	neutral	gnomAD	AF=1.63515e-01, allele-count=41019, n-homozygotes=3538	32461654
P51617	IRAK1	T209A	T	209	A	26	experimental	loss	UniProt	MUTAGEN T->A: Completely abolishes auto-phosphorylation in the kinase domain.	14625308
P51617	IRAK1	K239S	K	239	S	96	experimental	loss	UniProt	MUTAGEN K->S: Loss of kinase activity.	15084582
P51617	IRAK1	D340N	D	340	N	426	experimental	loss	UniProt	MUTAGEN D->N: Loss of kinase activity.	18691762
P51617	IRAK1	T387A	T	387	A	536	experimental	loss	UniProt	MUTAGEN T->A: Loss of kinase activity.	14625308
P51617	IRAK1	S532L	S	532	L	870	germline	neutral	gnomAD	AF=0.32643, allele-count=110671, n-homozygotes=26813	32461654
P51617	IRAK1	R194H	R	194	H	11	germline	neutral	gnomAD	AF=4.62010e-03, allele-count=828, n-homozygotes=12	32461654
P51617	IRAK1	F196S	F	196	S	13	germline	neutral	gnomAD	AF=0.2836, allele-count=129023, n-homozygotes=32457	32461654
P51617	IRAK1	C203S	C	203	S	20	germline	neutral	gnomAD	AF=5.06692e-03, allele-count=923, n-homozygotes=21	32461654
O43187	IRAK2	S47Y	S	47	Y	-	germline	neutral	gnomAD	AF=1.35450e-02, allele-count=3400, n-homozygotes=45	32461654
O43187	IRAK2	L392V	L	392	V	579	germline	neutral	gnomAD	AF=3.67850e-01, allele-count=92496, n-homozygotes=18278	32461654
O43187	IRAK2	D431E	D	431	E	-	germline	neutral	gnomAD	AF=0.271294, allele-count=183045, n-homozygotes=68803	32461654
O43187	IRAK2	L439V	L	439	V	-	germline	neutral	gnomAD	AF=2.68267e-02, allele-count=6743, n-homozygotes=164	32461654
O43187	IRAK2	L503I	L	503	I	-	germline	neutral	gnomAD	AF=1.31130e-02, allele-count=3296, n-homozygotes=128	32461654
O43187	IRAK2	D574H	D	574	H	-	germline	neutral	gnomAD	AF=1.55409e-03, allele-count=389, n-homozygotes=6	32461654
O43187	IRAK2	I99V	I	99	V	-	germline	neutral	gnomAD	AF=9.80587e-03, allele-count=2364, n-homozygotes=48	32461654
O43187	IRAK2	R147T	R	147	T	-	germline	neutral	gnomAD	AF=5.02701e-03, allele-count=1072, n-homozygotes=35	32461654
O43187	IRAK2	R566W	R	566	W	-	germline	neutral	gnomAD	AF=1.45780e-03, allele-count=366, n-homozygotes=6	32461654
Q9NWZ3	IRAK4	K213A	K	213	A	96	experimental	loss	UniProt	MUTAGEN K->A: Loss of kinase activity.	15084582
Q9NWZ3	IRAK4	G298D	G	298	D	384	germline	decrease	UniProt	VARIANT G -> D (in IMD67; decreases inhibition of NF-kappa-B complex activation; impairs neutrophil migration and phagocytosis; dbSNP:rs568782766)	19663824,21057262,24316379
Q9NWZ3	IRAK4	A428T	A	428	T	812	germline	neutral	gnomAD	AF=1.13641e-01, allele-count=28505, n-homozygotes=1920	32461654
Q9NWZ3	IRAK4	R391H	R	391	H	615	germline	neutral	gnomAD	AF=1.12789e-02, allele-count=2818, n-homozygotes=27	32461654
Q08881	ITK	P288G	P	288	G	-	experimental	decrease	UniProt	MUTAGEN P->G: Complete loss of interaction with PPIA/CYPA.	15308100
Q08881	ITK	V587I	V	587	I	813	germline	neutral	gnomAD	AF=4.01941e-03, allele-count=1009, n-homozygotes=9	32461654
P23458	JAK1	V658F	V	658	F	-	experimental	activating	UniProt+PubMed	MUTAGEN V->F: Constitutively active. Increased receptor signaling pathway via JAK-STAT.	16239216
P23458	JAK1	K908A	K	908	A	96	experimental	loss	UniProt	MUTAGEN K->A: Loss of protein tyrosine kinase activity.	32750333
P23458	JAK1	A634D	A	634	D	-	germline	activating	UniProt	VARIANT A -> D (in AIIDE; constitutive gain of function resulting in increased receptor signaling pathway via JAK-STAT; no effect on protein abundance)	28111307
P23458	JAK1	S646F	S	646	F	-	germline	activating	PubMed	VARIANT constitutively-active	23791841
P23458	JAK1	S703I	S	703	I	-	germline	increase	UniProt	VARIANT S -> I (in AIIDE; increased activation of protein kinase activity; constitutive gain of function through the transactivation of associated JAK kinases; increased receptor signaling pathway via JAK-STAT)	32750333
O60674	JAK2	R867Q	R	867	Q	53	germline	activating	PubMed	VARIANT constitutively-active	29368262
O60674	JAK2	L393V	L	393	V	-	germline	neutral	gnomAD	AF=7.65579e-03, allele-count=1877, n-homozygotes=16	32461654
O60674	JAK2	R1063H	R	1063	H	623	germline	neutral	gnomAD	AF=4.36708e-03, allele-count=1063, n-homozygotes=7	32461654
O60674	JAK2	H574R	H	574	R	85	somatic	activating	PubMed	VARIANT constitutively-active	26216197
O60674	JAK2	V617F	V	617	F	187	somatic	activating	UniProt	VARIANT V -> F (in PV, THCYT3 and AML; associated with susceptibility to Budd-Chiari syndrome; somatic mutation in a high percentage of patients with essential thrombocythemia or myelofibrosis; leads to constitutive tyrosine phosphorylation activity that promotes cytokine hypersensitivity; dbSNP:rs77375493)	15781101,15793561,15858187,16247455,16325696,16603627
O60674	JAK2	H345L	H	345	L	-	somatic	activating	PubMed	VARIANT constitutively-active	30259120
O60674	JAK2	R683G	R	683	G	439	somatic	activating	PubMed	VARIANT constitutively-active	26216197,23748007,23452118,20585391
O60674	JAK2	K539A	K	539	A	-	somatic	activating	PubMed	VARIANT constitutively-active	22584586
O60674	JAK2	S523L	S	523	L	-	somatic	activating	PubMed	VARIANT constitutively-active	32956452
P52333	JAK3	Y785F	Y	785	F	-	experimental	decrease	UniProt	MUTAGEN Y->F: Strong decrease of JAK3 phosphorylation.	15121872
P52333	JAK3	Y904F	Y	904	F	235	experimental	decrease	UniProt	MUTAGEN Y->F: About 40% loss of STAT5a activation.	18250158
P52333	JAK3	K855A	K	855	A	96	experimental	loss	UniProt	MUTAGEN K->A: More than 90% loss of STAT5a activation.	18250158
P52333	JAK3	Y939F	Y	939	F	390	experimental	loss	UniProt	MUTAGEN Y->F: About 80% loss of STAT5a activation.	18250158
P52333	JAK3	C759R	C	759	R	822	germline	activating	UniProt	VARIANT C -> R (in T(-)B(+)NK(-) SCID; constitutive phosphorylation)	9354668
P52333	JAK3	V722I	V	722	I	606	germline	neutral	gnomAD	AF=8.62378e-03, allele-count=2168, n-homozygotes=20	32461654
P52333	JAK3	P132T	P	132	T	-	germline	neutral	gnomAD	AF=6.17005e-03, allele-count=1363, n-homozygotes=51	32461654
P52333	JAK3	A572V	A	572	V	149	somatic	activating	PubMed	VARIANT constitutively-active	29986854,24928228,22705984,18829468
O60229	KALRN	K2713A	K	2713	A	96	experimental	loss	UniProt	MUTAGEN K->A: Loss of autophosphorylation.	10023074
O60229	KALRN	R1930M	R	1930	M	-	germline	neutral	gnomAD	AF=5.79340e-03, allele-count=1452, n-homozygotes=51	32461654
P35968	KDR	R726A	R	726	A	-	experimental	decrease	UniProt	MUTAGEN R->A: Strongly reduced autophosphorylation and activation of MAP kinases.	20080685
P35968	KDR	D731A	D	731	A	-	experimental	decrease	UniProt	MUTAGEN D->A: Strongly reduced autophosphorylation and activation of MAP kinases.	20080685
P35968	KDR	Y996F	Y	996	F	354	experimental	decrease	UniProt	MUTAGEN Y->F: Strongly reduced autophosphorylation. Reduces phosphorylation of PLCG1.	10102632
P35968	KDR	C1045A	C	1045	A	478	experimental	increase	UniProt	MUTAGEN C->A: Significantly higher kinase activity.	23199280
P35968	KDR	K868M	K	868	M	96	experimental	loss	UniProt	MUTAGEN K->M: Loss of enzyme activity.	11387210
P35968	KDR	Y1175F	Y	1175	F	865	experimental	loss	UniProt	MUTAGEN Y->F: Abolishes phosphorylation of PLCG1 and MAP kinases in response to VEGFA.	11387210
P35968	KDR	Y1214F	Y	1214	F	-	experimental	loss	UniProt	MUTAGEN Y->F: Loss of phosphorylation site. Abolishes reorganization of the actin cytoskeleton in response to VEGFA.	16966330
P35968	KDR	Y801F	Y	801	F	-	experimental	loss	UniProt	MUTAGEN Y->F: Abolishes stimulation of nitric oxide synthesis.	17303569
P35968	KDR	Y951F	Y	951	F	276	experimental	loss	UniProt	MUTAGEN Y->F: Abolishes reorganization of the actin cytoskeleton and cell migration in response to VEGFA.	15962004
P35968	KDR	V848E	V	848	E	46	germline	decrease	UniProt	VARIANT V -> E (strongly reduced autophosphorylation and kinase activity; dbSNP:rs1139776)	10037737,1656371
P35968	KDR	C482R	C	482	R	-	germline	decrease	UniProt	VARIANT C -> R (in HCI; associated with disease susceptibility; expression of FLT1 in hemangioma endothelial cells is markedly reduced and KDR activity is increased compared to controls; low FLT1 expression in hemangioma cells is caused by reduced activity of a pathway involving ITGB1, ANTXR1, KDR and NFATC2IP; the mutation predicts to result in loss-of-function and disruption of the normal assoc…	17344846,18931684
P35968	KDR	Q472H	Q	472	H	-	germline	neutral	gnomAD	AF=2.22728e-01, allele-count=55838, n-homozygotes=7417	32461654
P35968	KDR	V297I	V	297	I	-	germline	neutral	gnomAD	AF=1.05788e-01, allele-count=26587, n-homozygotes=1724	32461654
P35968	KDR	T689M	T	689	M	-	germline	neutral	gnomAD	AF=3.18522e-03, allele-count=800, n-homozygotes=7	32461654
P35968	KDR	L840F	L	840	F	37	somatic	resistance	COSMIC	-	-
P10721	KIT	Y823F	Y	823	F	508	experimental	activating	UniProt	MUTAGEN Y->F: No decrease in activity. Leads to autophosphorylation at Tyr-900.	20147452
P10721	KIT	R381A	R	381	A	-	experimental	decrease	UniProt	MUTAGEN R->A: Reduces autophosphorylation in response to KITLG/SCF.	17662946
P10721	KIT	E386A	E	386	A	-	experimental	decrease	UniProt	MUTAGEN E->A: Reduces autophosphorylation in response to KITLG/SCF.	17662946
P10721	KIT	N822I	N	822	I	507	germline	activating	UniProt	VARIANT N -> I (in MASTC; constitutively activated; dbSNP:rs993022333)	21689725
P10721	KIT	D816F	D	816	F	491	somatic	activating	UniProt	VARIANT D -> F (in MASTC; sporadic case; somatic mutation; requires 2 nucleotide substitutions; constitutively activated and is much more rapidly autophosphorylated than wild type)	9990072
P10721	KIT	D816H	D	816	H	491	somatic	activating	UniProt	VARIANT D -> H (in a testicular tumor; seminoma; somatic mutation; constitutively activated; dbSNP:rs121913506)	10362788,19164557,20147452
P10721	KIT	D816I	D	816	I	491	somatic	activating	UniProt	VARIANT D -> I (in MASTC; somatic mutation; constitutively activated; requires 2 nucleotide substitutions; dbSNP:rs1057519709)	19865100
P10721	KIT	D816Y	D	816	Y	491	somatic	activating	UniProt	VARIANT D -> Y (in MASTSYS and MASTC; also found in acute myeloid leukemia and a germ cell tumor of the testis; somatic mutation; constitutively activated; dbSNP:rs121913506)	16175573,17344846,19865100,9657776,9990072
P10721	KIT	D816V	D	816	V	491	somatic	activating	UniProt+PubMed	VARIANT D -> V (in MASTSYS, MASTC and mast cell leukemia; somatic mutation; constitutively activated; loss of interaction with MPDZ; dbSNP:rs121913507)	11018522,17595334,19164557,19265199,19865100,21640708,7691885,9990072
P10721	KIT	N822K	N	822	K	507	somatic	activating	PubMed	VARIANT constitutively-active	31217744,14695343,15621809,15911092
P10721	KIT	L576P	L	576	P	18	somatic	activating	PubMed	VARIANT constitutively-active	19723893,19802003,21595858
P10721	KIT	E839K	E	839	K	544	somatic	loss	UniProt	VARIANT E -> K (in MASTC; sporadic case; somatic mutation; dominant negative mutation; loss of autophosphorylation; dbSNP:rs121913509)	9990072
P10721	KIT	T670I	T	670	I	233	somatic	resistance	COSMIC	-	-
P10721	KIT	V654A	V	654	A	179	somatic	resistance	COSMIC	-	-
P10721	KIT	N822K	N	822	K	507	somatic	resistance	COSMIC	-	-
P10721	KIT	Y823D	Y	823	D	508	somatic	resistance	COSMIC	-	-
P10721	KIT	D816H	D	816	H	491	somatic	resistance	COSMIC	-	-
P10721	KIT	D820Y	D	820	Y	503	somatic	resistance	COSMIC	-	-
P10721	KIT	N822Y	N	822	Y	507	somatic	resistance	COSMIC	-	-
P10721	KIT	D820G	D	820	G	503	somatic	resistance	COSMIC	-	-
P10721	KIT	D820E	D	820	E	503	somatic	resistance	COSMIC	-	-
P10721	KIT	D816E	D	816	E	491	somatic	resistance	COSMIC	-	-
P10721	KIT	A829P	A	829	P	529	somatic	resistance	COSMIC	-	-
P10721	KIT	K642E	K	642	E	151	somatic	resistance	COSMIC	-	-
P10721	KIT	C809G	C	809	G	478	somatic	resistance	COSMIC	-	-
P10721	KIT	N655T	N	655	T	180	somatic	resistance	COSMIC	-	-
P10721	KIT	D716N	D	716	N	287	somatic	resistance	COSMIC	-	-
P10721	KIT	D816G	D	816	G	491	somatic	resistance	COSMIC	-	-
Q8IVT5	KSR1	E72K	E	72	K	-	experimental	decrease	UniProt	MUTAGEN E->K: Loss of interaction with BRAF and MAP2K1 and severe decrease in MAP2K1 phosphorylation levels.	29433126
Q6VAB6	KSR2	D786A	D	786	A	426	experimental	loss	UniProt	MUTAGEN D->A: Loss of kinase activity.	21441910
O95835	LATS1	Y559F	Y	559	F	-	experimental	decrease	UniProt	MUTAGEN Y->F: Loss of interaction with YAP1.	18158288
O95835	LATS1	S464A	S	464	A	-	experimental	loss	UniProt	MUTAGEN S->A: Abolishes phosphorylation by NUAK1 and NUAK2.	19927127
O95835	LATS1	K734A	K	734	A	96	experimental	loss	UniProt	MUTAGEN K->A: Loss of kinase activity, autophosphorylation, increased ploidy, prolonged duration of mitosis and lack of p53 expression.	15122335
O95835	LATS1	R96W	R	96	W	-	germline	neutral	gnomAD	AF=3.61719e-03, allele-count=909, n-homozygotes=5	32461654
O95835	LATS1	S204G	S	204	G	-	germline	neutral	gnomAD	AF=6.48999e-03, allele-count=1632, n-homozygotes=61	32461654
Q9NRM7	LATS2	K697A	K	697	A	96	experimental	loss	UniProt	MUTAGEN K->A: Loss of kinase activity, autophosphorylation and tumor suppressor activity.	10871863,12853976
Q9NRM7	LATS2	S872A	S	872	A	529	experimental	loss	UniProt	MUTAGEN S->A: Loss of tumor suppressor activity.	12853976
Q9NRM7	LATS2	A1014G	A	1014	G	-	germline	neutral	gnomAD	AF=1.27641e-03, allele-count=321, n-homozygotes=3	32461654
Q9NRM7	LATS2	G363S	G	363	S	-	germline	neutral	gnomAD	AF=0.119816, allele-count=179209, n-homozygotes=79395	32461654
P06239	LCK	Y505F	Y	505	F	862	experimental	activating	PubMed	VARIANT constitutively-active	20826747,1292628,8397196,15199125
P53667	LIMK1	T508V	T	508	V	528	experimental	decrease	UniProt	MUTAGEN T->V: Reduces kinase activity.	10196227,10652353
P53667	LIMK1	T508E	T	508	E	528	experimental	increase	UniProt	MUTAGEN T->E: Phosphomimetic mutant; enhances kinase activity.	22328514
P53667	LIMK1	C84S	C	84	S	-	experimental	increase	UniProt	MUTAGEN C->S: Enhances actin aggregation.	10196227
P53667	LIMK1	T508A	T	508	A	528	experimental	loss	UniProt	MUTAGEN T->A: Abolishes activation by ROCK1.	10196227,10652353
P53667	LIMK1	D460N	D	460	N	426	experimental	loss	UniProt	MUTAGEN D->N,A: Abrogates kinase activity.	10196227,22328514
P53667	LIMK1	D460A	D	460	A	426	experimental	loss	UniProt	MUTAGEN D->N,A: Abrogates kinase activity.	10196227,22328514
P53667	LIMK1	G190A	G	190	A	-	germline	neutral	gnomAD	AF=4.12806e-03, allele-count=1023, n-homozygotes=23	32461654
P53671	LIMK2	T505E	T	505	E	532	experimental	increase	UniProt	MUTAGEN T->E: Phosphomimetic mutant; enhances kinase activity.	11018042,22328514
P53671	LIMK2	T505V	T	505	V	532	experimental	loss	UniProt	MUTAGEN T->V: Abolishes cofilin phosphorylation and enhancement of stress fiber formation.	11018042
P53671	LIMK2	D451A	D	451	A	426	experimental	loss	UniProt	MUTAGEN D->A: Abrogates kinase activity.	22328514
P53671	LIMK2	G35S	G	35	S	-	germline	neutral	gnomAD	AF=1.52603e-01, allele-count=38194, n-homozygotes=4377	32461654
P53671	LIMK2	R213C	R	213	C	-	germline	neutral	gnomAD	AF=1.68222e-02, allele-count=4230, n-homozygotes=50	32461654
Q8IWU2	LMTK2	P30A	P	30	A	-	germline	neutral	gnomAD	AF=7.31369e-02, allele-count=3590, n-homozygotes=205	32461654
Q8IWU2	LMTK2	I693T	I	693	T	-	germline	neutral	gnomAD	AF=9.53367e-02, allele-count=23723, n-homozygotes=2983	32461654
Q8IWU2	LMTK2	A862T	A	862	T	-	germline	neutral	gnomAD	AF=3.68506e-03, allele-count=924, n-homozygotes=5	32461654
Q8IWU2	LMTK2	A1341G	A	1341	G	-	germline	neutral	gnomAD	AF=5.06291e-03, allele-count=1270, n-homozygotes=19	32461654
Q8IWU2	LMTK2	S1401N	S	1401	N	-	germline	neutral	gnomAD	AF=1.08019e-02, allele-count=2707, n-homozygotes=27	32461654
Q96Q04	LMTK3	L929V	L	929	V	-	germline	neutral	gnomAD	AF=1.49274e-03, allele-count=370, n-homozygotes=3	32461654
Q96Q04	LMTK3	V900L	V	900	L	-	germline	neutral	gnomAD	AF=1.49274e-03, allele-count=370, n-homozygotes=3	32461654
Q38SD2	LRRK1	K746G	K	746	G	-	experimental	decrease	UniProt	MUTAGEN K->G: No effect on GTP-binding but reduction in subsequent stimulation of kinase activity.	16243488
Q38SD2	LRRK1	I1412T	I	1412	T	482	experimental	decrease	UniProt	MUTAGEN I->T: No effect on GTP-binding but reduction in subsequent stimulation of kinase activity.	16243488
Q38SD2	LRRK1	K1270W	K	1270	W	96	experimental	loss	UniProt	MUTAGEN K->W: Loss of autophosphorylation.	16243488
Q38SD2	LRRK1	F1022C	F	1022	C	-	experimental	loss	UniProt	MUTAGEN F->C: No effect on GTP-binding but loss of subsequent stimulation of kinase activity.	16243488
Q5S007	LRRK2	L760D	L	760	D	-	experimental	decrease	UniProt	MUTAGEN L->D: Decreased kinase activity and loss of RAB29-mediated activation.	29212815
Q5S007	LRRK2	L761D	L	761	D	-	experimental	decrease	UniProt	MUTAGEN L->D: Decreased kinase activity and loss of RAB29-mediated activation.	29212815
Q5S007	LRRK2	L762D	L	762	D	-	experimental	decrease	UniProt	MUTAGEN L->D: Decreased kinase activity and loss of RAB29-mediated activation.	29212815
Q5S007	LRRK2	C727D	C	727	D	-	experimental	decrease	UniProt	MUTAGEN C->D: Decreased kinase activity. Loss of RAB29-mediated activation and autophosphorylation of S-910, S-935, S-955, S-973 and S-1292. Decreased membrane association; when associated with G-1441, C-1699 and S-2019.	29212815
Q5S007	LRRK2	L728D	L	728	D	-	experimental	decrease	UniProt	MUTAGEN L->D: Decreased kinase activity. Loss of RAB29-mediated activation and autophosphorylation of S-910, S-935, S-955, S-973 and S-1292. Decreased membrane association; when associated with G-1441, C-1699 and S-2019.	29212815
Q5S007	LRRK2	L729D	L	729	D	-	experimental	decrease	UniProt	MUTAGEN L->D: Decreased kinase activity. Loss of RAB29-mediated activation and autophosphorylation of S-910, S-935, S-955, S-973 and S-1292. Decreased membrane association; when associated with G-1441, C-1699 and S-2019.	29212815
Q5S007	LRRK2	H2391D	H	2391	D	-	experimental	increase	UniProt	MUTAGEN H->D: Increases kinase activity.	30635421
Q5S007	LRRK2	D1994A	D	1994	A	426	experimental	loss	UniProt	MUTAGEN D->A: Loss of kinase activity.	28720718
Q5S007	LRRK2	K1347A	K	1347	A	-	experimental	loss	UniProt	MUTAGEN K->A: GTPase-dead mutant. Loss of interaction with SEC16A and impaired ability to recruit SEC16A to endoplasmic reticulum exit sites.	25201882
Q5S007	LRRK2	K1906A	K	1906	A	96	experimental	loss	UniProt	MUTAGEN K->A: Loss of kinase activity. Decreases proteosomal degradation of MAPT; when associated with N-1994 and A-2017.	26014385
Q5S007	LRRK2	D1994N	D	1994	N	426	experimental	loss	UniProt	MUTAGEN D->N: Loss of kinase activity. No loss of interaction with SEC16A and no loss of ability to recruit SEC16A to endoplasmic reticulum exit sites. Decreases proteosomal degradation of MAPT; when associated with A-1906 and A-2017.	25201882,26014385,26824392
Q5S007	LRRK2	D2017A	D	2017	A	479	experimental	loss	UniProt	MUTAGEN D->A: Loss of kinase activity. Decreases proteosomal degradation of MAPT; when associated with A-1906 and N-1994. Loss of phosphorylation of RAB10; when associated with G-1441, C-1699, or S-2019.	26014385,29125462,29212815,30635421
Q5S007	LRRK2	G2019S	G	2019	S	481	germline	activating	PubMed	VARIANT constitutively-active	34419621,32550012,32926469,29038245,29311810,30150626,26931464,24916379,25009464,22952710,21454543,21698001,21806997,22110348
Q5S007	LRRK2	I2020T	I	2020	T	482	germline	increase	UniProt	VARIANT I -> T (in PARK8; significant increase in autophosphorylation of about 40% in comparison to wild-type protein in vitro; shows a progressive reduction in neurite length and branching; shows an increase in activity in phosphorylation of RAB8A and RAB10; dbSNP:rs35870237)	15541309,15880653,16172858,16251215,16321986,17114044,26824392,29212815
Q5S007	LRRK2	R1441G	R	1441	G	-	germline	increase	UniProt	VARIANT R->G: Decreased membrane association when associated with D-727, D-728, or D-729. Inhibits autophosphorylation and RAB10 phosphorylation when associated with N-1348 or A-2017.	29212815
Q5S007	LRRK2	R1728H	R	1728	H	-	germline	increase	UniProt	VARIANT R -> H (in PARK8; shows an increase in activity in phosphorylation of RAB8A and RAB10; dbSNP:rs145364431)	18213618,26824392,29212815
Q5S007	LRRK2	T2031S	T	2031	S	529	germline	increase	UniProt	VARIANT T -> S (in PARK8; shows an increase in activity in phosphorylation of RAB8A and RAB10; dbSNP:rs78029637)	26824392,29212815
Q5S007	LRRK2	R1441C	R	1441	C	-	germline	increase	UniProt	VARIANT R -> C (in PARK8; shows an increase in activity in both autophosphorylation and phosphorylation of a generic substrate; loss of interaction with SEC16A; shows an increase in activity in phosphorylation of RAB10; decreases phosphorylation-dependent binding to YWHAG; dbSNP:rs33939927)	15541309,16157909,16172858,16269541,16333314,16533964,25201882,26824392,28202711,29212815
Q5S007	LRRK2	R1441H	R	1441	H	-	germline	increase	UniProt	VARIANT R -> H (in PARK8; shows an increase in activity in phosphorylation of RAB8A and RAB10; decreases phosphorylation-dependent binding to YWHAG; dbSNP:rs34995376)	16157909,16172858,26824392,29212815
Q5S007	LRRK2	N551K	N	551	K	-	germline	neutral	gnomAD	AF=8.67706e-02, allele-count=21777, n-homozygotes=1184	32461654
Q5S007	LRRK2	I723V	I	723	V	-	germline	neutral	gnomAD	AF=5.84799e-02, allele-count=14694, n-homozygotes=637	32461654
Q5S007	LRRK2	P1262A	P	1262	A	-	germline	neutral	gnomAD	AF=1.74847e-03, allele-count=439, n-homozygotes=4	32461654
Q5S007	LRRK2	M1646T	M	1646	T	-	germline	neutral	gnomAD	AF=9.37500e-03, allele-count=2340, n-homozygotes=17	32461654
Q5S007	LRRK2	S1647T	S	1647	T	-	germline	neutral	gnomAD	AF=2.97567e-01, allele-count=74234, n-homozygotes=11750	32461654
Q5S007	LRRK2	M2397T	M	2397	T	-	germline	neutral	gnomAD	AF=0.382856, allele-count=153306, n-homozygotes=48382	32461654
P29376	LTK	Y862F	Y	862	F	-	experimental	decrease	UniProt	MUTAGEN Y->F: Impairs phosphorylation of CBLC (demonstrated with chimeric EGFR-LTK).	9223670
P29376	LTK	G750E	G	750	E	806	experimental	increase	UniProt	MUTAGEN G->E: Increases autophosphorylation and interaction with PI3-kinase subunit p85 (demonstrated with chimeric EGFR-LTK).	14695357
P29376	LTK	K544M	K	544	M	96	experimental	loss	UniProt	MUTAGEN K->M: Loss of interaction with PLCG1, PI3-kinase subunit p85, Ras GTPase-activating protein and RAF1.	8084603
P29376	LTK	R241A	R	241	A	-	experimental	loss	UniProt	MUTAGEN R->A: Abolished homodimerization following interaction with ALKAL1.	34646012
P29376	LTK	Y753F	Y	753	F	814	experimental	loss	UniProt	MUTAGEN Y->F: Abolishes interaction with PI3-kinase subunit p85, impairs PI3 kinase activity and leads to apoptosis (demonstrated with chimeric EGFR-LTK).	9223670
P29376	LTK	E763K	E	763	K	826	germline	increase	UniProt	VARIANT E -> K (may possibly contribute to susceptibility to systemic lupus erythematosus; increases autophosphorylation and interaction with PI3-kinase subunit p85; dbSNP:rs76282169)	14695357
P29376	LTK	R42Q	R	42	Q	-	germline	neutral	gnomAD	AF=1.31070e-01, allele-count=32211, n-homozygotes=2823	32461654
P29376	LTK	D535N	D	535	N	75	germline	neutral	gnomAD	AF=2.22122e-02, allele-count=5581, n-homozygotes=86	32461654
P29376	LTK	R569S	R	569	S	162	germline	neutral	gnomAD	AF=9.17104e-03, allele-count=2289, n-homozygotes=33	32461654
P07948	LYN	Y397F	Y	397	F	508	experimental	decrease	UniProt	MUTAGEN Y->F: Strongly reduced kinase activity.	16920712
P07948	LYN	Y508F	Y	508	F	862	experimental	increase	UniProt+PubMed	MUTAGEN Y->F: Abolishes autoinhibition and thereby increases kinase activity.	16920712
P07948	LYN	K275L	K	275	L	96	experimental	loss	UniProt	MUTAGEN K->L,R: Loss of kinase activity.	11435302,11517336,15173188,18817770
P07948	LYN	K275A	K	275	A	96	experimental	loss	UniProt	MUTAGEN K->A: Loss of activity and no effect on localization to the cell membrane. Abundant localization in the nucleus; when associated with A-2 and A-3.	11435302,11517336,15173188,18817770
P07948	LYN	K275R	K	275	R	96	experimental	loss	UniProt	MUTAGEN K->L,R: Loss of kinase activity.	11435302,11517336,15173188,18817770
P20794	MAK	K33R	K	33	R	96	experimental	loss	UniProt	MUTAGEN K->R: Abolishes autophosphorylation.	12084720
P20794	MAK	T157A	T	157	A	528	experimental	loss	UniProt	MUTAGEN T->A: Abolishes autophosphorylation and impairs kinase activity.	21986944
P20794	MAK	Y159F	Y	159	F	530	experimental	loss	UniProt	MUTAGEN Y->F: Abolishes autophosphorylation and impairs kinase activity.	21986944
P20794	MAK	G13S	G	13	S	40	germline	loss	UniProt	VARIANT G -> S (in RP62; results in a complete loss of kinase activity compared to wild-type; dbSNP:rs387906647)	21835304
P20794	MAK	N130H	N	130	H	431	germline	loss	UniProt	VARIANT N -> H (in RP62; results in a complete loss of kinase activity compared to wild-type; dbSNP:rs387906646)	21835304
P20794	MAK	P520S	P	520	S	-	germline	neutral	gnomAD	AF=2.93406e-02, allele-count=7377, n-homozygotes=269	32461654
Q02750	MAP2K1	F311S	F	311	S	16	experimental	decrease	UniProt	MUTAGEN F->S: Loss of interaction with BRAF and KSR1. Loss of BRAF-KSR1 dimerization.	29433126
Q02750	MAP2K1	M219V	M	219	V	504	experimental	increase	UniProt	MUTAGEN M->V: Increases interaction with KSR1 and BRAF.	29433126
Q02750	MAP2K1	N221Y	N	221	Y	528	experimental	increase	UniProt	MUTAGEN N->Y: Increases interaction with KSR1 and BRAF.	29433126
Q02750	MAP2K1	K97A	K	97	A	96	experimental	loss	UniProt	MUTAGEN K->A: Loss of catalytic activity. Strongly reduces phosphorylation upon UV irradiation.	20956560
Q02750	MAP2K1	K97R	K	97	R	96	experimental	loss	UniProt	MUTAGEN K->R: Loss of catalytic activity. No effect on BRAF-KSR1 or BRAF-KSR2 dimerization.	294,331,268,131,746
Q02750	MAP2K1	K57N	K	57	N	20	somatic	increase	UniProt	VARIANT K -> N (in MEL; somatic mutation; results in increased MAPK signal transduction; dbSNP:rs869025608)	29643386
Q02750	MAP2K1	G128V	G	128	V	180	somatic	resistance	COSMIC	-	-
Q02750	MAP2K1	C121S	C	121	S	159	somatic	resistance	COSMIC	-	-
Q02750	MAP2K1	P124L	P	124	L	172	somatic	resistance	COSMIC	-	-
Q02750	MAP2K1	V60E	V	60	E	23	somatic	resistance	COSMIC	-	-
Q02750	MAP2K1	G128D	G	128	D	180	somatic	resistance	COSMIC	-	-
Q02750	MAP2K1	P124S	P	124	S	172	somatic	resistance	COSMIC	-	-
Q02750	MAP2K1	E203K	E	203	K	465	somatic	resistance	COSMIC	-	-
Q02750	MAP2K1	K57E	K	57	E	20	somatic	resistance	COSMIC	-	-
Q02750	MAP2K1	K57N	K	57	N	20	somatic	resistance	COSMIC	-	-
Q02750	MAP2K1	K57T	K	57	T	20	somatic	resistance	COSMIC	-	-
Q02750	MAP2K1	K57E	K	57	E	20	somatic/germline	activating	PubMed	VARIANT constitutively-active	32387835,31827134
Q02750	MAP2K1	Q56P	Q	56	P	19	somatic/germline	activating	PubMed	VARIANT constitutively-active	32387835,31827134
P36507	MAP2K2	P128Q	P	128	Q	172	germline	increase	UniProt	VARIANT P -> Q (in CFC4; results in increased kinase activity; dbSNP:rs267607230)	20358587
P36507	MAP2K2	C125S	C	125	S	159	somatic	resistance	COSMIC	-	-
P36507	MAP2K2	N126D	N	126	D	162	somatic	resistance	COSMIC	-	-
P36507	MAP2K2	F57C	F	57	C	16	somatic	resistance	COSMIC	-	-
P36507	MAP2K2	V35M	V	35	M	-	somatic	resistance	COSMIC	-	-
P36507	MAP2K2	E207K	E	207	K	465	somatic	resistance	COSMIC	-	-
P36507	MAP2K2	L46F	L	46	F	5	somatic	resistance	COSMIC	-	-
P36507	MAP2K2	Q60P	Q	60	P	19	somatic	resistance	COSMIC	-	-
P46734	MAP2K3	S218E	S	218	E	503	experimental	activating	UniProt	MUTAGEN S->E: Constitutive activation.	8622669
P46734	MAP2K3	T222E	T	222	E	528	experimental	activating	UniProt	MUTAGEN T->E: Constitutive activation.	8622669
P46734	MAP2K3	S218A	S	218	A	503	experimental	loss	UniProt	MUTAGEN S->A: Inactivation.	8622669
P46734	MAP2K3	T222A	T	222	A	528	experimental	loss	UniProt	MUTAGEN T->A: Inactivation.	8622669
Q13163	MAP2K5	K195M	K	195	M	96	experimental	loss	UniProt	MUTAGEN K->M: Inactivation.	7759517
Q13163	MAP2K5	S311A	S	311	A	503	experimental	loss	UniProt	MUTAGEN S->A: Inactivation.	7759517
Q13163	MAP2K5	T315A	T	315	A	529	experimental	loss	UniProt	MUTAGEN T->A: Inactivation.	7759517
P52564	MAP2K6	S207E	S	207	E	503	experimental	activating	UniProt	MUTAGEN S->E: Constitutive activation according to PubMed:8622669, but not to PubMed:8621675.	8622669,8621675
P52564	MAP2K6	T211E	T	211	E	528	experimental	activating	UniProt	MUTAGEN T->E: Constitutive activation according to PubMed:8622669, but not to PubMed:8621675.	8622669,8621675
P52564	MAP2K6	S207A	S	207	A	503	experimental	loss	UniProt	MUTAGEN S->A: Inactivation.
P52564	MAP2K6	T211A	T	211	A	528	experimental	loss	UniProt	MUTAGEN T->A: Inactivation.
Q13233	MAP3K1	L189P	L	189	P	-	germline	increase	UniProt	VARIANT L -> P (in SRXY6; increases phosphorylation of the downstream target MAPK3/MAPK1 compared to wild-type and enhances binding of RHOA to the mutant MAP3K1 complex; dbSNP:rs387906788)	21129722
Q13233	MAP3K1	L189R	L	189	R	-	germline	increase	UniProt	VARIANT L -> R (in SRXY6; increases phosphorylation of the downstream targets MAPK14 and MAPK3/MAPK1 compared to wild-type and enhances binding of RHOA to the mutant MAP3K1 complex; dbSNP:rs387906788)	21129722
Q13233	MAP3K1	D806N	D	806	N	-	germline	neutral	gnomAD	AF=0.406021, allele-count=147940, n-homozygotes=47342	32461654
Q13233	MAP3K1	V906I	V	906	I	-	germline	neutral	gnomAD	AF=0.242419, allele-count=188624, n-homozygotes=72588	32461654
Q02779	MAP3K10	P168Q	P	168	Q	218	germline	neutral	gnomAD	AF=2.15071e-03, allele-count=538, n-homozygotes=3	32461654
Q16584	MAP3K11	K144A	K	144	A	96	experimental	decrease	UniProt	MUTAGEN K->A: Greatly reduced autophosphorylation activity.	11053428,8195146
Q16584	MAP3K11	E164A	E	164	A	149	experimental	decrease	UniProt	MUTAGEN E->A: Greatly reduced autophosphorylation activity.	8195146
Q16584	MAP3K11	T277A	T	277	A	524	experimental	decrease	UniProt	MUTAGEN T->A: Severely reduced autophosphorylation activity. Prevents phosphorylation of SAPK and MAPK14.	11053428
Q16584	MAP3K11	S281A	S	281	A	528	experimental	decrease	UniProt	MUTAGEN S->A: Reduced autophosphorylation activity. Reduced activation of SAPK and MAPK14.	11053428
Q16584	MAP3K11	K144R	K	144	R	96	experimental	loss	UniProt	MUTAGEN K->R: Loss of kinase activity. Prevents activation of SAPK and MAPK14.	11053428,8195146
Q16584	MAP3K11	P252H	P	252	H	440	germline	neutral	gnomAD	AF=3.16478e-03, allele-count=795, n-homozygotes=7	32461654
Q12852	MAP3K12	G640S	G	640	S	-	germline	neutral	gnomAD	AF=1.71716e-03, allele-count=427, n-homozygotes=5	32461654
O43283	MAP3K13	K195A	K	195	A	96	experimental	loss	UniProt	MUTAGEN K->A: Kinase inactive. Fails to activate NF-kappa-B.	12492477
Q6ZN16	MAP3K15	A192T	A	192	T	-	germline	neutral	gnomAD	AF=0.157252, allele-count=143515, n-homozygotes=39285	32461654
Q6ZN16	MAP3K15	S199N	S	199	N	-	germline	neutral	gnomAD	AF=5.58340e-03, allele-count=957, n-homozygotes=4	32461654
Q6ZN16	MAP3K15	S456G	S	456	G	-	germline	neutral	gnomAD	AF=6.82070e-03, allele-count=1151, n-homozygotes=8	32461654
Q6ZN16	MAP3K15	G838S	G	838	S	592	germline	neutral	gnomAD	AF=5.08735e-03, allele-count=866, n-homozygotes=3	32461654
Q6ZN16	MAP3K15	S993L	S	993	L	-	germline	neutral	gnomAD	AF=3.46076e-03, allele-count=632, n-homozygotes=3	32461654
Q6ZN16	MAP3K15	Q1251E	Q	1251	E	-	germline	neutral	gnomAD	AF=3.68585e-03, allele-count=675, n-homozygotes=2	32461654
Q56UN5	MAP3K19	T438I	T	438	I	-	germline	neutral	gnomAD	AF=1.59738e-01, allele-count=40152, n-homozygotes=3701	32461654
Q56UN5	MAP3K19	E676Q	E	676	Q	-	germline	neutral	gnomAD	AF=5.26358e-02, allele-count=13234, n-homozygotes=1584	32461654
Q56UN5	MAP3K19	E812G	E	812	G	-	germline	neutral	gnomAD	AF=4.29658e-02, allele-count=10793, n-homozygotes=1391	32461654
Q9NYL2	MAP3K20	T162A	T	162	A	525	experimental	decrease	UniProt	MUTAGEN T->A: Slight loss of autophosphorylation activity.	15342622
Q9NYL2	MAP3K20	K45M	K	45	M	96	experimental	loss	UniProt	MUTAGEN K->M: Loss of kinase activity. Does not affect ability to activate EIF2AK4/GCN2 in response to mild ribosome collision.	11836244,32610081,35857590
Q9NYL2	MAP3K20	T161A	T	161	A	524	experimental	loss	UniProt	MUTAGEN T->A: Loss of autophosphorylation activity.	15342622
Q9NYL2	MAP3K20	S165A	S	165	A	528	experimental	loss	UniProt	MUTAGEN S->A: Loss of autophosphorylation activity.	15342622
Q99759	MAP3K3	V281M	V	281	M	-	germline	neutral	gnomAD	AF=1.87714e-03, allele-count=472, n-homozygotes=8	32461654
Q9Y6R4	MAP3K4	K1372R	K	1372	R	96	experimental	loss	UniProt	MUTAGEN K->R: Loss of activity.	12052864,9305639
Q9Y6R4	MAP3K4	H906P	H	906	P	-	germline	neutral	gnomAD	AF=2.32965e-02, allele-count=5854, n-homozygotes=102	32461654
Q9Y6R4	MAP3K4	R157H	R	157	H	-	germline	neutral	gnomAD	AF=0.03652, allele-count=241423, n-homozygotes=116361	32461654
Q99683	MAP3K5	S1033A	S	1033	A	-	experimental	increase	UniProt	MUTAGEN S->A: Enhanced induction of apoptosis and increased kinase activity.	15094778
Q99683	MAP3K5	S966A	S	966	A	881	experimental	increase	UniProt	MUTAGEN S->A: Enhanced induction of apoptosis, increased kinase activity, and loss of YWHAG binding.	10411906,15094778
Q99683	MAP3K5	K709M	K	709	M	96	experimental	loss	UniProt	MUTAGEN K->M: Loss of kinase activity. Inhibits activation of JNK and apoptosis mediated by TNFRSF6 and DAXX. Does not affect interaction with TRIM48.	17210579,29186683,9743501
Q99683	MAP3K5	K709R	K	709	R	96	experimental	loss	UniProt	MUTAGEN K->R: Loss of kinase activity. Abolishes DAXX-mediated apoptosis. Loss of RC3H2-mediated ubiquitination.	17210579,24448648,9743501
Q99683	MAP3K5	I1250V	I	1250	V	-	germline	neutral	gnomAD	AF=1.85448e-03, allele-count=465, n-homozygotes=5	32461654
Q99683	MAP3K5	T1314I	T	1314	I	-	germline	neutral	gnomAD	AF=1.23000e-02, allele-count=3091, n-homozygotes=38	32461654
Q99683	MAP3K5	D1315N	D	1315	N	-	germline	neutral	gnomAD	AF=6.40694e-03, allele-count=1610, n-homozygotes=10	32461654
O95382	MAP3K6	N622K	N	622	K	-	germline	neutral	gnomAD	AF=2.26042e-01, allele-count=53166, n-homozygotes=7082	32461654
O95382	MAP3K6	R499C	R	499	C	-	germline	neutral	gnomAD	AF=3.01505e-03, allele-count=739, n-homozygotes=17	32461654
O95382	MAP3K6	G1233A	G	1233	A	-	germline	neutral	gnomAD	AF=4.37140e-02, allele-count=10987, n-homozygotes=566	32461654
O43318	MAP3K7	K63W	K	63	W	96	experimental	loss	UniProt	MUTAGEN K->W: Loss of kinase activity. Loss of autophosphorylation.	12589052,22802624
O43318	MAP3K7	P512L	P	512	L	-	germline	increase	UniProt	VARIANT P -> L (in FMD2; does not affect interaction with TAB2; does not affect homodimerization; increases autophosphorylation; increases MAPK signaling; increases NF-kappa-B signaling; dbSNP:rs886039230)	27426733
P41279	MAP3K8	T290D	T	290	D	536	experimental	decrease	UniProt	MUTAGEN T->D: Impaired MEK phosphorylation and autophosphorylation activities. No effect on KSR2 binding.	15466476
P41279	MAP3K8	T290E	T	290	E	536	experimental	decrease	UniProt	MUTAGEN T->E: Loss of MEK phosphorylation activity and almost abolished autophosphorylation activity. No effect on KSR2 binding.	15466476
P41279	MAP3K8	T290A	T	290	A	536	experimental	loss	UniProt	MUTAGEN T->A: Loss of MEK phosphorylation activity and almost abolished autophosphorylation activity. Loss of IL1-stimulated MEK phosphorylation activity but not of IL1-stimulated autophosphorylation activity. No effect on KSR2 binding.	15466476
P80192	MAP3K9	T304A	T	304	A	503	experimental	decrease	UniProt	MUTAGEN T->A: Reduces threonine phosphorylation. Impairs JNK activation.	15610029
P80192	MAP3K9	S308A	S	308	A	529	experimental	decrease	UniProt	MUTAGEN S->A: Impairs JNK activation.	15610029
P80192	MAP3K9	T305A	T	305	A	504	experimental	decrease	UniProt	MUTAGEN T->A: Little effect on threonine phosphorylation. Mildly impairs JNK activation.	15610029
P80192	MAP3K9	K171A	K	171	A	96	experimental	loss	UniProt	MUTAGEN K->A: Loss of kinase activity and threonine phosphorylation.	15610029
P80192	MAP3K9	T312A	T	312	A	536	experimental	loss	UniProt	MUTAGEN T->A: Loss of threonine phosphorylation. Strongly impairs JNK activation.	15610029
P80192	MAP3K9	Y646C	Y	646	C	-	germline	neutral	gnomAD	AF=1.49776e-02, allele-count=3745, n-homozygotes=39	32461654
Q92918	MAP4K1	T355A	T	355	A	-	experimental	activating	UniProt	MUTAGEN T->A: Retains kinase activity. Not degraded by the Cul7-RING ubiquitin-protein ligase complex containing FBXW8.	24362026
Q92918	MAP4K1	P351S	P	351	S	-	germline	neutral	gnomAD	AF=4.80006e-03, allele-count=877, n-homozygotes=17	32461654
Q8IVH8	MAP4K3	K48E	K	48	E	102	experimental	loss	UniProt	Loss of kinase activity and ability to;activate JNK family.	9275185
Q8IVH8	MAP4K3	K45E	K	45	E	96	experimental	loss	UniProt	MUTAGEN K->E: Loss of kinase activity and ability to activate JNK family.	9275185
Q9Y4K4	MAP4K5	K49R	K	49	R	96	experimental	loss	UniProt	MUTAGEN K->R: Loss of kinase activity and ability to activate JNK family.	9038372
Q9Y4K4	MAP4K5	A334T	A	334	T	-	germline	neutral	gnomAD	AF=4.72288e-02, allele-count=9348, n-homozygotes=333	32461654
Q9Y4K4	MAP4K5	P407L	P	407	L	-	germline	neutral	gnomAD	AF=1.09403e-02, allele-count=2713, n-homozygotes=38	32461654
Q9Y4K4	MAP4K5	K473N	K	473	N	-	germline	neutral	gnomAD	AF=9.06165e-03, allele-count=2162, n-homozygotes=18	32461654
Q9Y4K4	MAP4K5	T633M	T	633	M	-	germline	neutral	gnomAD	AF=6.98135e-02, allele-count=17204, n-homozygotes=986	32461654
P28482	MAPK1	D318A	D	318	A	857	experimental	increase	UniProt	MUTAGEN D->A: Loss of dephosphorylation by PTPRJ.	18794356,19494114
P28482	MAPK1	I74N	I	74	N	152	germline	increase	UniProt	VARIANT I -> N (in NS13; results in increased MAPK signaling; reduced interaction wth DUSP6; no effect on interaction with MAP2K1)	32721402
P28482	MAPK1	H80Y	H	80	Y	171	germline	increase	UniProt	VARIANT H -> Y (in NS13; results in increased MAPK signaling; reduced interaction wth DUSP6; no effect on interaction with MAP2K1)	32721402
P28482	MAPK1	A174V	A	174	V	492	germline	increase	UniProt	VARIANT A -> V (in NS13; results in increased MAPK signaling; increased translocation to the nucleus; reduced interaction wth DUSP6; no effect on interaction with MAP2K1)	32721402
P28482	MAPK1	D318G	D	318	G	857	germline	increase	UniProt	VARIANT D -> G (in NS13; results in increased MAPK signaling; increased translocation to the nucleus; reduced interaction wth DUSP6; no effect on interaction with MAP2K1)	32721402
P28482	MAPK1	P323R	P	323	R	862	germline	increase	UniProt	VARIANT P -> R (in NS13; results in increased MAPK signaling; increased translocation to the nucleus; reduced interaction wth DUSP6; no effect on interaction with MAP2K1)	32721402
P53779	MAPK10	C462S	C	462	S	-	experimental	loss	UniProt	MUTAGEN C->S: Loss of palmitoylation.	21941371
P53779	MAPK10	C463S	C	463	S	-	experimental	loss	UniProt	MUTAGEN C->S: Loss of palmitoylation.	21941371
Q15759	MAPK11	T180A	T	180	A	528	experimental	loss	UniProt	MUTAGEN T->A: Inactivation.	15356147
Q15759	MAPK11	Y182F	Y	182	F	530	experimental	loss	UniProt	MUTAGEN Y->F: Inactivation.	15356147
Q15759	MAPK11	R275H	R	275	H	799	germline	neutral	gnomAD	AF=1.86619e-02, allele-count=4636, n-homozygotes=52	32461654
P53778	MAPK12	D179A	D	179	A	493	experimental	activating	UniProt	MUTAGEN D->A: Emulation of the active state.	15284239
P53778	MAPK12	Y185F	Y	185	F	530	experimental	loss	UniProt	MUTAGEN Y->F: Loss of activity.	8633070
O15264	MAPK13	T180A	T	180	A	528	experimental	loss	UniProt	MUTAGEN T->A: Loss of kinase activity.	9374491
O15264	MAPK13	Y182A	Y	182	A	530	experimental	loss	UniProt	MUTAGEN Y->A: Loss of kinase activity.	9374491
O15264	MAPK13	A300T	A	300	T	843	germline	neutral	gnomAD	AF=2.14231e-03, allele-count=535, n-homozygotes=3	32461654
Q16539	MAPK14	A34V	A	34	V	41	experimental	decrease	UniProt	MUTAGEN A->V: Lowered kinase activity.	7493921
Q16539	MAPK14	K54R	K	54	R	97	experimental	decrease	UniProt	MUTAGEN K->R: Impairs MAP2K6/MKK6-dependent autophosphorylation.	11010976
Q16539	MAPK14	Y69H	Y	69	H	147	experimental	decrease	UniProt	MUTAGEN Y->H: Lowered kinase activity.	15284239
Q16539	MAPK14	A320T	A	320	T	864	experimental	decrease	UniProt	MUTAGEN A->T: Lowered kinase activity.	15284239
Q16539	MAPK14	D176A	D	176	A	493	experimental	increase	UniProt	MUTAGEN D->A: Emulation of the active state. Increase in activity; when associated with S-327 or L-327.	15284239
Q16539	MAPK14	F327L	F	327	L	871	experimental	increase	UniProt	MUTAGEN F->L: Emulation of the active state. Increase in activity; when associated with A-176.	15284239
Q16539	MAPK14	F327S	F	327	S	871	experimental	increase	UniProt	MUTAGEN F->S: Emulation of the active state. Increase in activity; when associated with A-176.	15284239
Q16539	MAPK14	K53R	K	53	R	96	experimental	loss	UniProt	MUTAGEN K->R: Loss of kinase activity.	7493921
Q16539	MAPK14	D168A	D	168	A	479	experimental	loss	UniProt	MUTAGEN D->A: Loss of kinase activity.	7493921
Q16539	MAPK14	D177A	D	177	A	499	experimental	loss	UniProt	MUTAGEN D->A: Loss of kinase activity.	15284239
Q16539	MAPK14	T180E	T	180	E	528	experimental	loss	UniProt	MUTAGEN T->E: Loss of kinase activity.	7493921
Q16539	MAPK14	Y182F	Y	182	F	530	experimental	loss	UniProt	MUTAGEN Y->F: Loss of kinase activity.	7493921
Q16539	MAPK14	W337R	W	337	R	881	experimental	loss	UniProt	MUTAGEN W->R: Loss of kinase activity.	15284239
Q8TD08	MAPK15	K42R	K	42	R	96	experimental	loss	UniProt	MUTAGEN K->R: Loss of autophosphorylation and activity. Does not increase dopamine transporter activity. Impairs kinase activity. Does not rescue cilium assembly in MAPK15-depleted cells.	11875070,28842414,29021280
Q8TD08	MAPK15	R59Q	R	59	Q	148	experimental	loss	UniProt	MUTAGEN R->Q: Does not increase dopamine transporter activity. Impairs kinase activity.	28842414
Q8TD08	MAPK15	Y177A	Y	177	A	530	experimental	loss	UniProt	MUTAGEN Y->A: Loss of autophosphorylation and activity. Heavily phosphorylated at Thr-175.	11875070,16336213
Q8TD08	MAPK15	D155A	D	155	A	479	experimental	loss	UniProt	MUTAGEN D->A: Unable to induce the formation of autophagosomal structures. Is able to bind to MAP1LC3B and to colocalize with this protein to autophagosomal structures. Does not induce phosphorylation by methyl methanesulfonate. Loas of phosphorylation. Dominant negative mutant. Not phosphorylated at Thr-175 and Tyr-177.	16336213,19166846,22948227
Q8TD08	MAPK15	T175A	T	175	A	528	experimental	loss	UniProt	MUTAGEN T->A: Loss of autophosphorylation and activity. Still heavily phosphorylated at Tyr-177. Does not rescues inhibition of O-glycosylation in MAPK15-depleted cells; when associated with F-177.	11875070,16336213,24618899
Q8TD08	MAPK15	T221K	T	221	K	639	germline	neutral	gnomAD	AF=5.51900e-02, allele-count=13656, n-homozygotes=620	32461654
Q8TD08	MAPK15	S505P	S	505	P	-	germline	neutral	gnomAD	AF=2.36558e-02, allele-count=5856, n-homozygotes=122	32461654
P31152	MAPK4	V38M	V	38	M	53	germline	neutral	gnomAD	AF=3.65559e-01, allele-count=91131, n-homozygotes=17854	32461654
P45983	MAPK8	T183A	T	183	A	528	experimental	decrease	UniProt	MUTAGEN T->A: Phosphorylation blocked.	7839144
P45983	MAPK8	Y185F	Y	185	F	530	experimental	decrease	UniProt	MUTAGEN Y->F: Phosphorylation blocked.	7839144
P45983	MAPK8	K55D	K	55	D	96	experimental	loss	UniProt	MUTAGEN K->D: Abolished protein kinase activity.	22966201,28943315
P49137	MAPKAPK2	T222A	T	222	A	529	experimental	decrease	UniProt	MUTAGEN T->A: Strong decrease in kinase activity.	14517288,15014438,8846784
P49137	MAPKAPK2	S272A	S	272	A	660	experimental	decrease	UniProt	MUTAGEN S->A: Strong decrease in kinase activity.	8846784
P49137	MAPKAPK2	T334A	T	334	A	861	experimental	decrease	UniProt	MUTAGEN T->A: Slight decrease in kinase activity.	14517288,15014438,8846784
P49137	MAPKAPK2	K353R	K	353	R	880	experimental	increase	UniProt	MUTAGEN K->R: Induces decreased sumoylation and increase in protein kinase activity.	21131586
P49137	MAPKAPK2	S272D	S	272	D	660	experimental	increase	UniProt	MUTAGEN S->D: Mimicks phosphorylation state, leading to slight increase of basal kinase activity.	8846784
P49137	MAPKAPK2	T222D	T	222	D	529	experimental	increase	UniProt	MUTAGEN T->D: Mimicks phosphorylation state, leading to slight increase of basal kinase activity.	14517288,15014438,8846784
P49137	MAPKAPK2	T334D	T	334	D	861	experimental	increase	UniProt	MUTAGEN T->D,E: Mimicks phosphorylation state, leading to elevated basal kinase activity.	14517288,15014438,8846784
P49137	MAPKAPK2	K93R	K	93	R	96	experimental	loss	UniProt	MUTAGEN K->R: Kinase defective mutant, abolishes activity.	14517288
P49137	MAPKAPK2	D207A	D	207	A	479	experimental	loss	UniProt	MUTAGEN D->A: Kinase defective mutant, abolishes activity.	8846784
P49137	MAPKAPK2	A361S	A	361	S	-	germline	neutral	gnomAD	AF=2.25086e-03, allele-count=566, n-homozygotes=4	32461654
Q16644	MAPKAPK3	K73M	K	73	M	96	experimental	loss	UniProt	MUTAGEN K->M: Higher affinity toward PCH2.	15563468
Q8IW41	MAPKAPK5	L337G	L	337	G	-	experimental	activating	UniProt	MUTAGEN L->G: Induces constitutive protein kinase activity.	21329882
Q8IW41	MAPKAPK5	T182D	T	182	D	529	experimental	activating	UniProt	MUTAGEN T->D: Mimicks phosphorylation state and induces constitutive protein kinase activity.	12808055,21329882,9628874
Q8IW41	MAPKAPK5	S212D	S	212	D	573	experimental	increase	UniProt	MUTAGEN S->D: Mimicks phosphorylation state and displays a slightly higher protein kinase activity.	12808055
Q8IW41	MAPKAPK5	K51M	K	51	M	96	experimental	loss	UniProt	MUTAGEN K->M: Kinase defective mutant, abolishes activity.	12808055
Q9P0L2	MARK1	T215E	T	215	E	529	experimental	activating	UniProt	MUTAGEN T->E: Constitutively active.	14976552
Q9P0L2	MARK1	T215A	T	215	A	529	experimental	loss	UniProt	MUTAGEN T->A: Prevents phosphorylation and activation by STK11/LKB1 complex.	14976552
Q7KZI7	MARK2	T208A	T	208	A	529	experimental	loss	UniProt	MUTAGEN T->A: Prevents phosphorylation and activation by STK11/LKB1 complex.	14976552
P27448	MARK3	T211A	T	211	A	529	experimental	loss	UniProt	MUTAGEN T->A: Prevents phosphorylation and activation by STK11/LKB1 complex.	14976552
P27448	MARK3	S443G	S	443	G	-	germline	neutral	gnomAD	AF=1.07853e-02, allele-count=2691, n-homozygotes=205	32461654
Q96L34	MARK4	T214E	T	214	E	529	experimental	increase	UniProt	MUTAGEN T->E: Mimicks phosphorylation state, leading to increased activity. Decreases mTORC1 activity.	14976552,23184942
Q96L34	MARK4	T214A	T	214	A	529	experimental	loss	UniProt	MUTAGEN T->A: Prevents phosphorylation and activation by STK11/LKB1 complex.	14976552
Q6P0Q8	MAST2	D388E	D	388	E	-	germline	neutral	gnomAD	AF=0.206283, allele-count=197891, n-homozygotes=79511	32461654
Q6P0Q8	MAST2	I659M	I	659	M	489	germline	neutral	gnomAD	AF=4.66145e-01, allele-count=116211, n-homozygotes=27651	32461654
Q6P0Q8	MAST2	R991L	R	991	L	-	germline	neutral	gnomAD	AF=3.40499e-03, allele-count=657, n-homozygotes=6	32461654
Q6P0Q8	MAST2	K1197R	K	1197	R	-	germline	neutral	gnomAD	AF=5.37037e-02, allele-count=13398, n-homozygotes=460	32461654
Q6P0Q8	MAST2	V1304M	V	1304	M	-	germline	neutral	gnomAD	AF=5.46385e-02, allele-count=13525, n-homozygotes=481	32461654
Q6P0Q8	MAST2	A1463T	A	1463	T	-	germline	neutral	gnomAD	AF=5.22477e-03, allele-count=1291, n-homozygotes=40	32461654
Q6P0Q8	MAST2	D1551G	D	1551	G	-	germline	neutral	gnomAD	AF=7.49559e-02, allele-count=18627, n-homozygotes=963	32461654
Q6P0Q8	MAST2	K1673R	K	1673	R	-	germline	neutral	gnomAD	AF=5.29350e-02, allele-count=13195, n-homozygotes=460	32461654
O60307	MAST3	G861S	G	861	S	-	germline	neutral	gnomAD	AF=0.465439, allele-count=129059, n-homozygotes=35486	32461654
Q96GX5	MASTL	K72M	K	72	M	120	experimental	activating	UniProt	MUTAGEN K->M: Hyperactive form.	21164014
Q96GX5	MASTL	T337K	T	337	K	-	germline	neutral	gnomAD	AF=1.17237e-02, allele-count=2940, n-homozygotes=122	32461654
Q96GX5	MASTL	V610I	V	610	I	-	germline	neutral	gnomAD	AF=9.32528e-03, allele-count=2341, n-homozygotes=17	32461654
P42679	MATK	A496T	A	496	T	868	germline	neutral	gnomAD	AF=3.93043e-02, allele-count=7598, n-homozygotes=214	32461654
Q14680	MELK	T167E	T	167	E	529	experimental	activating	UniProt	MUTAGEN T->D,E: Phosphomimetic mutant that has similar kinase activity as wild-type.	14976552
Q14680	MELK	Y163F	Y	163	F	508	experimental	decrease	UniProt	MUTAGEN Y->F: Abolishes autophosphorylation on tyrosine but still active on exogenous substrates.	16216881
Q14680	MELK	D150A	D	150	A	479	experimental	loss	UniProt	MUTAGEN D->A: Abolishes enzymatic activity.	14699119,16216881,17280616
Q14680	MELK	T167A	T	167	A	529	experimental	loss	UniProt	MUTAGEN T->A: Abolishes activation of serine/threonine-protein kinase activity and has only weak activity.	14976552
Q14680	MELK	S171A	S	171	A	536	experimental	loss	UniProt	MUTAGEN S->A: Abolishes activation of serine/threonine-protein kinase activity and has only weak activity.	16216881
Q14680	MELK	S171D	S	171	D	536	experimental	loss	UniProt	MUTAGEN S->D: Inactive.	16216881
Q14680	MELK	K219R	K	219	R	650	germline	neutral	gnomAD	AF=8.92829e-03, allele-count=2243, n-homozygotes=67	32461654
Q14680	MELK	R333K	R	333	K	-	germline	neutral	gnomAD	AF=7.63675e-03, allele-count=1920, n-homozygotes=89	32461654
Q14680	MELK	T348I	T	348	I	-	germline	neutral	gnomAD	AF=3.91350e-03, allele-count=983, n-homozygotes=15	32461654
Q12866	MERTK	R865W	R	865	W	862	germline	neutral	gnomAD	AF=1.86109e-03, allele-count=468, n-homozygotes=2	32461654
Q12866	MERTK	S118N	S	118	N	-	germline	neutral	gnomAD	AF=2.31079e-01, allele-count=58098, n-homozygotes=7540	32461654
Q12866	MERTK	R293H	R	293	H	-	germline	neutral	gnomAD	AF=9.56675e-03, allele-count=2406, n-homozygotes=25	32461654
Q12866	MERTK	R466K	R	466	K	-	germline	neutral	gnomAD	AF=0.402503, allele-count=150206, n-homozygotes=46300	32461654
Q12866	MERTK	N498S	N	498	S	-	germline	neutral	gnomAD	AF=4.81220e-03, allele-count=1210, n-homozygotes=32	32461654
Q12866	MERTK	I518V	I	518	V	-	germline	neutral	gnomAD	AF=0.402362, allele-count=150251, n-homozygotes=46314	32461654
Q12866	MERTK	V870I	V	870	I	867	germline	neutral	gnomAD	AF=4.51407e-02, allele-count=11351, n-homozygotes=486	32461654
Q12866	MERTK	Q662E	Q	662	E	220	germline	neutral	gnomAD	AF=1.53905e-03, allele-count=387, n-homozygotes=5	32461654
P08581	MET	N375S	N	375	S	-	germline	neutral	gnomAD	AF=2.70386e-02, allele-count=6190, n-homozygotes=184	32461654
P08581	MET	R970C	R	970	C	-	germline	neutral	gnomAD	AF=2.88471e-03, allele-count=717, n-homozygotes=3	32461654
P08581	MET	T992I	T	992	I	-	germline	neutral	gnomAD	AF=7.89124e-03, allele-count=1962, n-homozygotes=11	32461654
P08581	MET	E168D	E	168	D	-	germline	neutral	gnomAD	AF=3.72365e-03, allele-count=921, n-homozygotes=3	32461654
P08581	MET	H1094L	H	1094	L	48	tumor-predisposition	activating	UniProt	VARIANT H -> L (in RCCP; constitutive autophosphorylation; causes malignant transformation in cell lines)	10327054
P08581	MET	H1094Y	H	1094	Y	48	tumor-predisposition	activating	UniProt	VARIANT H -> Y (in RCCP; constitutive autophosphorylation; causes malignant transformation in cell lines; dbSNP:rs121913244)	10327054
P08581	MET	H1106D	H	1106	D	91	tumor-predisposition	activating	UniProt	VARIANT H -> D (in RCCP; constitutive autophosphorylation; causes malignant transformation in cell lines)	10327054,10433944
P08581	MET	V1092I	V	1092	I	46	tumor-predisposition	activating	UniProt	VARIANT V -> I (in RCCP; constitutive autophosphorylation; dbSNP:rs786202724)	10327054,10417759,10433944
P08581	MET	Y1230D	Y	1230	D	498	tumor-predisposition	activating	UniProt	VARIANT Y -> D (in RCCP; constitutive autophosphorylation; causes malignant transformation in cell lines)	10327054,10433944
P08581	MET	N375K	N	375	K	-	tumor-predisposition	decrease	UniProt	VARIANT N -> K (found in lung cancer also including cases carrying EGFR mutations; unknown pathological significance; decreased hepatocyte growth factor-activated receptor activity; decreased interaction with HGF; dbSNP:rs776693512)	28294470
P08581	MET	Y1234C	Y	1234	C	507	tumor-predisposition	decrease	UniProt	VARIANT Y -> C (in DA11; not phosphorylated in reponse to HGF; severely decreased tyrosin kinase activity; dbSNP:rs1554400286)	30777867
P08581	MET	P991S	P	991	S	-	tumor-predisposition	increase	UniProt	VARIANT P -> S (in gastric cancer; prolonged tyrosine phosphorylation in response to HGF/SF; transforming activity in athymic nude mice; dbSNP:rs768678989)	11042681
P08581	MET	N1100Y	N	1100	Y	74	somatic	activating	PubMed	VARIANT constitutively-active	20145145
P08581	MET	Y1230S	Y	1230	S	498	somatic	resistance	COSMIC	-	-
P08581	MET	D1228V	D	1228	V	491	somatic	resistance	COSMIC	-	-
P08581	MET	Y1230H	Y	1230	H	498	somatic	resistance	COSMIC	-	-
P08581	MET	D1228N	D	1228	N	491	somatic	resistance	COSMIC	-	-
P08581	MET	Y1230C	Y	1230	C	498	somatic	resistance	COSMIC	-	-
P08581	MET	D1228H	D	1228	H	491	somatic	resistance	COSMIC	-	-
Q8N4C8	MINK1	P775L	P	775	L	-	germline	neutral	gnomAD	AF=4.84462e-01, allele-count=90669, n-homozygotes=24734	32461654
Q8N4C8	MINK1	V863I	V	863	I	-	germline	neutral	gnomAD	AF=1.50282e-01, allele-count=33793, n-homozygotes=4592	32461654
Q9BUB5	MKNK1	T385D	T	385	D	863	experimental	activating	UniProt	MUTAGEN T->D: Constitutively active.	11463832
Q9BUB5	MKNK1	D308N	D	308	N	642	germline	neutral	gnomAD	AF=3.81598e-03, allele-count=676, n-homozygotes=3	32461654
Q9BUB5	MKNK1	R446Q	R	446	Q	-	germline	neutral	gnomAD	AF=1.06454e-02, allele-count=2655, n-homozygotes=19	32461654
Q9HBH9	MKNK2	T379D	T	379	D	863	experimental	activating	UniProt	MUTAGEN T->D: Constitutively active.	11463832
Q9HBH9	MKNK2	D228G	D	228	G	481	experimental	decrease	UniProt	MUTAGEN D->G: Reduced phosphorylation.	16917500
Q9HBH9	MKNK2	Q10K	Q	10	K	-	germline	neutral	gnomAD	AF=9.52943e-02, allele-count=13414, n-homozygotes=796	32461654
Q9HBH9	MKNK2	R428Q	R	428	Q	-	germline	neutral	gnomAD	AF=1.73023e-02, allele-count=4213, n-homozygotes=56	32461654
Q8NB16	MLKL	E351K	E	351	K	481	experimental	increase	UniProt	MUTAGEN E->K: Binds ATP with an enhanced affinity.	24219132
Q8NB16	MLKL	K230M	K	230	M	96	experimental	loss	UniProt	MUTAGEN K->M: Abolishes ATP-binding.	24219132
Q8NB16	MLKL	K331N	K	331	N	426	experimental	loss	UniProt	MUTAGEN K->N: Impairs ATP-binding.	24219132
Q8NB16	MLKL	S52T	S	52	T	-	germline	neutral	gnomAD	AF=4.38202e-03, allele-count=1102, n-homozygotes=5	32461654
Q8NB16	MLKL	D100E	D	100	E	-	germline	neutral	gnomAD	AF=2.76349e-03, allele-count=695, n-homozygotes=12	32461654
Q8NB16	MLKL	S132P	S	132	P	-	germline	neutral	gnomAD	AF=1.40205e-02, allele-count=3526, n-homozygotes=54	32461654
Q8NB16	MLKL	R146Q	R	146	Q	-	germline	neutral	gnomAD	AF=1.48920e-02, allele-count=3742, n-homozygotes=78	32461654
Q8NB16	MLKL	M169L	M	169	L	-	germline	neutral	gnomAD	AF=4.26084e-03, allele-count=1070, n-homozygotes=3	32461654
Q9UQ07	MOK	Q398R	Q	398	R	-	germline	neutral	gnomAD	AF=2.26307e-01, allele-count=56709, n-homozygotes=7414	32461654
Q9UQ07	MOK	R38H	R	38	H	107	germline	neutral	gnomAD	AF=1.22340e-03, allele-count=305, n-homozygotes=2	32461654
Q9UQ07	MOK	D86N	D	86	N	238	germline	neutral	gnomAD	AF=5.29607e-03, allele-count=1294, n-homozygotes=11	32461654
Q9UQ07	MOK	K230R	K	230	R	690	germline	neutral	gnomAD	AF=1.30647e-02, allele-count=3285, n-homozygotes=191	32461654
Q9UQ07	MOK	P248S	P	248	S	795	germline	neutral	gnomAD	AF=1.10595e-03, allele-count=278, n-homozygotes=2	32461654
Q04912	MST1R	R322Q	R	322	Q	-	germline	neutral	gnomAD	AF=4.29842e-02, allele-count=10777, n-homozygotes=324	32461654
Q04912	MST1R	R1335G	R	1335	G	843	germline	neutral	gnomAD	AF=4.08392e-01, allele-count=102561, n-homozygotes=23564	32461654
Q04912	MST1R	S434L	S	434	L	-	germline	neutral	gnomAD	AF=1.80238e-03, allele-count=453, n-homozygotes=2	32461654
Q04912	MST1R	N440S	N	440	S	-	germline	neutral	gnomAD	AF=5.98218e-03, allele-count=1503, n-homozygotes=60	32461654
Q04912	MST1R	R75S	R	75	S	-	germline	neutral	gnomAD	AF=1.22225e-03, allele-count=307, n-homozygotes=5	32461654
Q04912	MST1R	Q523R	Q	523	R	-	germline	neutral	gnomAD	AF=4.07530e-01, allele-count=102273, n-homozygotes=23417	32461654
Q04912	MST1R	Q613P	Q	613	P	-	germline	neutral	gnomAD	AF=1.09704e-02, allele-count=2758, n-homozygotes=40	32461654
P42345	MTOR	T2173A	T	2173	A	-	experimental	increase	UniProt	MUTAGEN T->A: Increased mTOR kinase activity.	24247430
P42345	MTOR	H2340A	H	2340	A	-	experimental	loss	UniProt	MUTAGEN H->A: Barely detectable kinase activity.	23636326
P42345	MTOR	E1799K	E	1799	K	-	germline	increase	UniProt	VARIANT E -> K (in SKS; results in increased mTOR signaling; dbSNP:rs863225264)	25851998,26542245
P42345	MTOR	A1459D	A	1459	D	-	somatic	increase	UniProt	VARIANT A -> D (in FCORD2; somatic mutation; increased TOR signaling)	26018084
P42345	MTOR	C1483R	C	1483	R	-	somatic	increase	UniProt	VARIANT C -> R (in FCORD2; somatic mutation; increased TOR signaling; increased kinase activity; dbSNP:rs1057519914)	25799227
P42345	MTOR	L2427P	L	2427	P	-	somatic	increase	UniProt	VARIANT L -> P (in FCORD2; somatic mutation; increased TOR signaling; increased kinase activity; dbSNP:rs1085307113)	25799227
P42345	MTOR	L2427Q	L	2427	Q	-	somatic	increase	UniProt	VARIANT L -> Q (in FCORD2; somatic mutation; increased TOR signaling; increased kinase activity; dbSNP:rs1085307113)	25799227
P42345	MTOR	F2108L	F	2108	L	-	somatic	resistance	COSMIC	-	-
P42345	MTOR	L1460P	L	1460	P	-	somatic/germline	increase	UniProt	VARIANT L -> P (in FCORD2; somatic mutation; increased TOR signaling; dbSNP:rs1057519779)	26018084,27830187
P42345	MTOR	S2215F	S	2215	F	-	somatic/germline	increase	UniProt	VARIANT S -> F (in FCORD2; somatic mutation; increased TOR signaling; dbSNP:rs587777894)	25799227,26018084,27830187
P42345	MTOR	S2215Y	S	2215	Y	-	somatic/germline	increase	UniProt	VARIANT S -> Y (in FCORD2; also found in a colorectal adenocarcinoma sample; somatic mutation; increased TOR signaling; dbSNP:rs587777894)	17344846,26018084,27830187
O15146	MUSK	G584C	G	584	C	40	experimental	decrease	UniProt	MUTAGEN G->C,D: Mild decrease in kinase activity.	25029443
O15146	MUSK	G584D	G	584	D	40	experimental	decrease	UniProt	MUTAGEN G->C,D: Mild decrease in kinase activity.	25029443
O15146	MUSK	K609R	K	609	R	96	experimental	loss	UniProt	MUTAGEN K->R: Severe loss of kinase activity.	25029443
O15146	MUSK	D743N	D	743	N	479	experimental	loss	UniProt	MUTAGEN D->N: Severe loss of kinase activity.	25029443
O15146	MUSK	I575T	I	575	T	30	germline	decrease	UniProt	VARIANT I -> T (in FADS1; reduces agrin-dependent AChR aggregation and tyrosine kinase activity in developing neuromuscular junction; dbSNP:rs751889864)	25537362
O15146	MUSK	M605I	M	605	I	91	germline	decrease	UniProt	VARIANT M -> I (in CMS9; affects interaction with DOK7 and impairs MUSK phosphorylation; altered AChR clustering; dbSNP:rs766640370)	20371544
O15146	MUSK	A727V	A	727	V	428	germline	decrease	UniProt	VARIANT A -> V (in CMS9; affects interaction with DOK7 and impairs MUSK phosphorylation; altered AChR clustering; dbSNP:rs397515450)	20371544
O15146	MUSK	V790M	V	790	M	593	germline	decrease	UniProt	VARIANT V -> M (in CMS9; does not affect catalytic kinase activity; reduces protein expression and stability; dbSNP:rs199476083)	15496425
O15146	MUSK	M413I	M	413	I	-	germline	neutral	gnomAD	AF=1.19611e-01, allele-count=29807, n-homozygotes=2125	32461654
O15146	MUSK	V829L	V	829	L	806	germline	neutral	gnomAD	AF=4.33346e-02, allele-count=10349, n-homozygotes=629	32461654
O15146	MUSK	T100M	T	100	M	-	germline	neutral	gnomAD	AF=2.30394e-02, allele-count=5741, n-homozygotes=107	32461654
O15146	MUSK	S159G	S	159	G	-	germline	neutral	gnomAD	AF=1.48484e-01, allele-count=26461, n-homozygotes=2252	32461654
O15146	MUSK	V644A	V	644	A	185	germline	neutral	gnomAD	AF=2.97621e-03, allele-count=730, n-homozygotes=4	32461654
Q15746	MYLK	K608A	K	608	A	-	experimental	loss	UniProt	MUTAGEN K->A: Loss of acetylation and no kinase activity repression by NAA10/ARD1.	19826488
Q15746	MYLK	A1491S	A	1491	S	93	germline	decrease	UniProt	VARIANT A -> S (in AAT7; decreases kinase activity; dbSNP:rs1576422965)	29544503
Q15746	MYLK	A1754T	A	1754	T	-	germline	decrease	UniProt	VARIANT A -> T (in AAT7; 4-fold reduced affinity for calmodulin; decreased kinase activity compared to wild-type protein)	21055718
Q15746	MYLK	L861P	L	861	P	-	germline	neutral	gnomAD	AF=1.15211e-01, allele-count=28763, n-homozygotes=4795	32461654
Q15746	MYLK	D914E	D	914	E	-	germline	neutral	gnomAD	AF=1.01870e-01, allele-count=25615, n-homozygotes=4219	32461654
Q15746	MYLK	V261A	V	261	A	-	germline	neutral	gnomAD	AF=1.16180e-01, allele-count=21447, n-homozygotes=3906	32461654
Q15746	MYLK	A701T	A	701	T	-	germline	neutral	gnomAD	AF=1.45635e-03, allele-count=366, n-homozygotes=2	32461654
Q15746	MYLK	P21H	P	21	H	-	germline	neutral	gnomAD	AF=1.18241e-01, allele-count=29719, n-homozygotes=2676	32461654
Q15746	MYLK	R845C	R	845	C	-	germline	neutral	gnomAD	AF=2.70092e-02, allele-count=6650, n-homozygotes=240	32461654
Q15746	MYLK	A128V	A	128	V	-	germline	neutral	gnomAD	AF=1.71115e-02, allele-count=4302, n-homozygotes=284	32461654
Q15746	MYLK	Q133H	Q	133	H	-	germline	neutral	gnomAD	AF=1.81355e-03, allele-count=456, n-homozygotes=3	32461654
Q15746	MYLK	P160R	P	160	R	-	germline	neutral	gnomAD	AF=1.15251e-03, allele-count=289, n-homozygotes=4	32461654
Q15746	MYLK	T1085A	T	1085	A	-	germline	neutral	gnomAD	AF=1.51627e-02, allele-count=3813, n-homozygotes=346	32461654
Q32MK0	MYLK3	V180L	V	180	L	-	germline	neutral	gnomAD	AF=0.445435, allele-count=139217, n-homozygotes=40479	32461654
Q86YV6	MYLK4	G50R	G	50	R	-	germline	neutral	gnomAD	AF=1.63794e-01, allele-count=41092, n-homozygotes=4242	32461654
Q86YV6	MYLK4	T126M	T	126	M	59	germline	neutral	gnomAD	AF=9.30129e-02, allele-count=23376, n-homozygotes=1414	32461654
Q86YV6	MYLK4	C318Y	C	318	Y	661	germline	neutral	gnomAD	AF=1.74205e-03, allele-count=438, n-homozygotes=3	32461654
Q86YV6	MYLK4	E39A	E	39	A	-	germline	neutral	gnomAD	AF=2.45104e-03, allele-count=616, n-homozygotes=9	32461654
Q8NEV4	MYO3A	S956N	S	956	N	-	germline	neutral	gnomAD	AF=0.498297, allele-count=126069, n-homozygotes=32583	32461654
Q8NEV4	MYO3A	R1313S	R	1313	S	-	germline	neutral	gnomAD	AF=0.398822, allele-count=151112, n-homozygotes=45639	32461654
Q8NEV4	MYO3A	T1284S	T	1284	S	-	germline	neutral	gnomAD	AF=4.11766e-01, allele-count=103340, n-homozygotes=21655	32461654
Q8NEV4	MYO3A	T178I	T	178	I	503	germline	neutral	gnomAD	AF=3.19350e-03, allele-count=803, n-homozygotes=13	32461654
Q8NEV4	MYO3A	I348V	I	348	V	-	germline	neutral	gnomAD	AF=0.323998, allele-count=169513, n-homozygotes=57719	32461654
Q8NEV4	MYO3A	V369I	V	369	I	-	germline	neutral	gnomAD	AF=0.322727, allele-count=169753, n-homozygotes=57906	32461654
Q8NEV4	MYO3A	A833S	A	833	S	-	germline	neutral	gnomAD	AF=6.36963e-02, allele-count=15940, n-homozygotes=678	32461654
Q8NEV4	MYO3A	A1032T	A	1032	T	-	germline	neutral	gnomAD	AF=8.14655e-03, allele-count=2047, n-homozygotes=15	32461654
Q8NEV4	MYO3A	V1045M	V	1045	M	-	germline	neutral	gnomAD	AF=2.20431e-03, allele-count=553, n-homozygotes=14	32461654
Q8NEV4	MYO3A	P1287T	P	1287	T	-	germline	neutral	gnomAD	AF=9.28566e-03, allele-count=2332, n-homozygotes=17	32461654
Q8NEV4	MYO3A	T1417I	T	1417	I	-	germline	neutral	gnomAD	AF=7.48415e-03, allele-count=1868, n-homozygotes=12	32461654
Q8NEV4	MYO3A	K1488E	K	1488	E	-	germline	neutral	gnomAD	AF=3.91536e-03, allele-count=984, n-homozygotes=14	32461654
Q8WXR4	MYO3B	I275V	I	275	V	824	germline	neutral	gnomAD	AF=2.38227e-03, allele-count=593, n-homozygotes=4	32461654
Q8WXR4	MYO3B	K309E	K	309	E	868	germline	neutral	gnomAD	AF=3.78679e-01, allele-count=94276, n-homozygotes=18812	32461654
Q8WXR4	MYO3B	A406T	A	406	T	-	germline	neutral	gnomAD	AF=7.10754e-03, allele-count=1771, n-homozygotes=70	32461654
Q8WXR4	MYO3B	V770I	V	770	I	-	germline	neutral	gnomAD	AF=0.145983, allele-count=211581, n-homozygotes=91144	32461654
Q8WXR4	MYO3B	R1082K	R	1082	K	-	germline	neutral	gnomAD	AF=0.0240929999999999, allele-count=243516, n-homozygotes=119341	32461654
Q8WXR4	MYO3B	R185H	R	185	H	504	germline	neutral	gnomAD	AF=5.16505e-03, allele-count=1289, n-homozygotes=10	32461654
Q8WXR4	MYO3B	E773G	E	773	G	-	germline	neutral	gnomAD	AF=3.42970e-01, allele-count=85230, n-homozygotes=15703	32461654
Q8WXR4	MYO3B	V1137I	V	1137	I	-	germline	neutral	gnomAD	AF=1.68945e-02, allele-count=4210, n-homozygotes=108	32461654
Q8WXR4	MYO3B	R1165C	R	1165	C	-	germline	neutral	gnomAD	AF=1.31561e-02, allele-count=3281, n-homozygotes=102	32461654
Q96PY6	NEK1	A463V	A	463	V	-	germline	neutral	gnomAD	AF=3.57846e-02, allele-count=8903, n-homozygotes=256	32461654
Q96PY6	NEK1	A598T	A	598	T	-	germline	neutral	gnomAD	AF=5.11292e-02, allele-count=12705, n-homozygotes=445	32461654
Q96PY6	NEK1	Q883E	Q	883	E	-	germline	neutral	gnomAD	AF=1.18794e-03, allele-count=293, n-homozygotes=2	32461654
Q96PY6	NEK1	E724G	E	724	G	-	germline	neutral	gnomAD	AF=9.84041e-02, allele-count=20681, n-homozygotes=1124	32461654
Q96PY6	NEK1	N717K	N	717	K	-	germline	neutral	gnomAD	AF=4.64949e-03, allele-count=919, n-homozygotes=3	32461654
Q6ZWH5	NEK10	K548R	K	548	R	96	experimental	decrease	UniProt	MUTAGEN K->R: Catalytically inactive. Impaired mucociliary transport.	20956560,31959991
Q6ZWH5	NEK10	G67S	G	67	S	-	germline	neutral	gnomAD	AF=4.02817e-03, allele-count=1001, n-homozygotes=3	32461654
Q6ZWH5	NEK10	L513S	L	513	S	25	germline	neutral	gnomAD	AF=2.68307e-01, allele-count=66465, n-homozygotes=9642	32461654
Q6ZWH5	NEK10	N659S	N	659	S	430	germline	neutral	gnomAD	AF=7.69726e-03, allele-count=1935, n-homozygotes=96	32461654
Q6ZWH5	NEK10	L701V	L	701	V	546	germline	neutral	gnomAD	AF=4.66969e-03, allele-count=1144, n-homozygotes=31	32461654
Q8NG66	NEK11	K61R	K	61	R	96	experimental	loss	UniProt	MUTAGEN K->R: Loss of kinase activity.	12154088
Q8NG66	NEK11	V562A	V	562	A	-	germline	neutral	gnomAD	AF=1.05681e-01, allele-count=26571, n-homozygotes=2395	32461654
Q8NG66	NEK11	Y123C	Y	123	C	256	germline	neutral	gnomAD	AF=1.35419e-03, allele-count=327, n-homozygotes=3	32461654
Q8NG66	NEK11	E451K	E	451	K	-	germline	neutral	gnomAD	AF=2.17502e-03, allele-count=547, n-homozygotes=4	32461654
Q8NG66	NEK11	E488V	E	488	V	-	germline	neutral	gnomAD	AF=0.351708, allele-count=162528, n-homozygotes=55261	32461654
P51955	NEK2	T175A	T	175	A	529	experimental	decrease	UniProt	MUTAGEN T->A: Kinase activity decreased by two fold.	17197699
P51955	NEK2	S171D	S	171	D	507	experimental	increase	UniProt	MUTAGEN S->D: Kinase activity increased by two fold.	17197699
P51955	NEK2	T170E	T	170	E	504	experimental	increase	UniProt	MUTAGEN T->E: Kinase activity increased by two fold.	17197699
P51955	NEK2	T175E	T	175	E	529	experimental	increase	UniProt	MUTAGEN T->E: Kinase activity increased by two fold.	17197699
P51955	NEK2	K37R	K	37	R	96	experimental	loss	UniProt	MUTAGEN K->R: Loss of kinase activity and of ability to activate NEK11. Loss of phosphorylation of CCDC102B.	15161910,17197699,30404835
P51955	NEK2	D141A	D	141	A	426	experimental	loss	UniProt	MUTAGEN D->A: Loss of autophosphorylation.	17197699
P51955	NEK2	T179A	T	179	A	536	experimental	loss	UniProt	MUTAGEN T->A: Loss of kinase activity.	17197699
P51955	NEK2	T179E	T	179	E	536	experimental	loss	UniProt	MUTAGEN T->E: Loss of kinase activity.	17197699
P51955	NEK2	S241A	S	241	A	802	experimental	loss	UniProt	MUTAGEN S->A: Loss of kinase activity.	17197699
P51955	NEK2	S241D	S	241	D	802	experimental	loss	UniProt	MUTAGEN S->D: Loss of kinase activity.	17197699
P51955	NEK2	N354S	N	354	S	-	germline	neutral	gnomAD	AF=1.55273e-01, allele-count=38907, n-homozygotes=3213	32461654
P51956	NEK3	H23L	H	23	L	55	germline	neutral	gnomAD	AF=2.95913e-02, allele-count=7106, n-homozygotes=158	32461654
P51956	NEK3	R122H	R	122	H	406	germline	neutral	gnomAD	AF=5.77114e-03, allele-count=1420, n-homozygotes=7	32461654
P51956	NEK3	E305D	E	305	D	-	germline	neutral	gnomAD	AF=2.63333e-02, allele-count=5950, n-homozygotes=379	32461654
P51956	NEK3	E477K	E	477	K	-	germline	neutral	gnomAD	AF=4.08726e-03, allele-count=664, n-homozygotes=10	32461654
P51957	NEK4	P225A	P	225	A	695	germline	neutral	gnomAD	AF=3.81177e-01, allele-count=88991, n-homozygotes=18241	32461654
P51957	NEK4	T357I	T	357	I	-	germline	neutral	gnomAD	AF=3.36406e-03, allele-count=846, n-homozygotes=20	32461654
P51957	NEK4	F567L	F	567	L	-	germline	neutral	gnomAD	AF=2.41152e-02, allele-count=6063, n-homozygotes=99	32461654
Q6P3R8	NEK5	K255Q	K	255	Q	848	germline	neutral	gnomAD	AF=1.06560e-01, allele-count=26792, n-homozygotes=1599	32461654
Q9HC98	NEK6	Y108A	Y	108	A	182	experimental	increase	UniProt	MUTAGEN Y->A: Increase in catalytic activity.	19941817
Q8TDX7	NEK7	N33D	N	33	D	29	experimental	decrease	UniProt	MUTAGEN N->D: Significant decrease in catalytic activity.	19941817
Q8TDX7	NEK7	R155E	R	155	E	405	experimental	decrease	UniProt	MUTAGEN R->E: Strongly reduced protein kinase activity.	26522158
Q8TDX7	NEK7	Y28A	Y	28	A	24	experimental	decrease	UniProt	MUTAGEN Y->A: Significant decrease in catalytic activity; when associated with A-31.	19941817
Q8TDX7	NEK7	L31A	L	31	A	27	experimental	decrease	UniProt	MUTAGEN L->A: Significant decrease in catalytic activity; when associated with A-28.	19941817
Q8TDX7	NEK7	N90A	N	90	A	162	experimental	decrease	UniProt	MUTAGEN N->A: Reduced protein kinase activity.	26522158
Q8TDX7	NEK7	N90R	N	90	R	162	experimental	decrease	UniProt	MUTAGEN N->R,K: Strongly reduced protein kinase activity.	26522158
Q8TDX7	NEK7	N90K	N	90	K	162	experimental	decrease	UniProt	MUTAGEN N->R,K: Strongly reduced protein kinase activity.	26522158
Q8TDX7	NEK7	M122A	M	122	A	252	experimental	decrease	UniProt	MUTAGEN M->A,R: Decreased interaction with NEK9 and subsequent activation of NEK7 kinase activity.	26522158
Q8TDX7	NEK7	M122R	M	122	R	252	experimental	decrease	UniProt	MUTAGEN M->A,R: Decreased interaction with NEK9 and subsequent activation of NEK7 kinase activity.	26522158
Q8TDX7	NEK7	Y97A	Y	97	A	182	experimental	increase	UniProt	MUTAGEN Y->A: 5-fold increase in catalytic activity.	19941817,26522158
Q8TDX7	NEK7	Y97F	Y	97	F	182	experimental	increase	UniProt	MUTAGEN Y->F,L: Moderate increase in catalytic activity.	19941817
Q8TDX7	NEK7	K96E	K	96	E	180	experimental	increase	UniProt	MUTAGEN K->E: Strongly increased protein kinase activity.	26522158
Q8TDX7	NEK7	Y97L	Y	97	L	182	experimental	increase	UniProt	MUTAGEN Y->F,L: Moderate increase in catalytic activity.	19941817
Q8TDX7	NEK7	S195A	S	195	A	529	experimental	loss	UniProt	MUTAGEN S->A: Abolished phosphorylation with NEK9 and protein kinase activity.	26522158
Q8TDX7	NEK7	R131A	R	131	A	357	experimental	loss	UniProt	MUTAGEN R->A,D: Abolished interaction with NEK9 and subsequent activation of NEK7 kinase activity.	26522158
Q8TDX7	NEK7	R131D	R	131	D	357	experimental	loss	UniProt	MUTAGEN R->A,D: Abolished interaction with NEK9 and subsequent activation of NEK7 kinase activity.	26522158
Q8TDX7	NEK7	L132D	L	132	D	358	experimental	loss	UniProt	MUTAGEN L->D: Abolished interaction with NEK9 and subsequent activation of NEK7 kinase activity.	26522158
Q8TDX7	NEK7	R35G	R	35	G	32	germline	neutral	gnomAD	AF=6.47532e-03, allele-count=1623, n-homozygotes=9	32461654
Q8TD19	NEK9	T210A	T	210	A	529	experimental	decrease	UniProt	MUTAGEN T->A: Significant reduction of autophosphorylation.	11864968
Q8TD19	NEK9	K81M	K	81	M	96	experimental	loss	UniProt	MUTAGEN K->M: Loss of activity and autophosphorylation.	12101123
Q8TD19	NEK9	I167T	I	167	T	391	germline	increase	UniProt	VARIANT I -> T (in NC; increased autophosphorylation at T-210; dbSNP:rs879253775)	27153399
Q8TD19	NEK9	I573T	I	573	T	-	germline	increase	UniProt	VARIANT I -> T (in NC; increased autophosphorylation at T-210; dbSNP:rs1555352529)	27153399
Q8TD19	NEK9	R429H	R	429	H	-	germline	neutral	gnomAD	AF=0.473703, allele-count=132108, n-homozygotes=37220	32461654
Q8TD19	NEK9	P828T	P	828	T	-	germline	neutral	gnomAD	AF=3.17810e-03, allele-count=799, n-homozygotes=16	32461654
Q8IY84	NIM1K	T229E	T	229	E	529	experimental	activating	UniProt	MUTAGEN T->E: Constitutively active.	15733851
Q8IY84	NIM1K	T229A	T	229	A	529	experimental	loss	UniProt	MUTAGEN T->A: Loss of autophosphorylation and kinase activity.	15733851
Q9UBE8	NLK	K167N	K	167	N	96	experimental	loss	UniProt	MUTAGEN K->N: Abrogates kinase activity.	20061393
P16066	NPR1	A182V	A	182	V	-	germline	neutral	gnomAD	AF=1.83041e-03, allele-count=416, n-homozygotes=6	32461654
P16066	NPR1	E967K	E	967	K	-	germline	neutral	gnomAD	AF=9.47932e-03, allele-count=1463, n-homozygotes=11	32461654
P20594	NPR2	W115G	W	115	G	-	germline	decrease	UniProt	VARIANT W -> G (in AMD1; markedly deficient activity; dbSNP:rs28931582)	15146390
P20594	NPR2	T297M	T	297	M	-	germline	decrease	UniProt	VARIANT T -> M (in AMD1; markedly deficient activity; dbSNP:rs1313765432)	15146390
P20594	NPR2	G413E	G	413	E	-	germline	decrease	UniProt	VARIANT G -> E (in AMD1; markedly deficient activity)	15146390
P20594	NPR2	L658F	L	658	F	475	germline	decrease	UniProt	VARIANT L -> F (in AMD1; no effect on subcellular location; changed glycosylation; no effect on C-type natriuretic peptide binding; decreased guanylate cyclase activity; loss of natriuretic peptide receptor activity; dominant negative effect; dbSNP:rs1314542724)	17652215,26980729
P20594	NPR2	R819C	R	819	C	-	germline	decrease	UniProt	VARIANT R -> C (in SNSK; loss of C-type natriuretic peptide-induced signaling; dominant negative effect; no effect on cell surface expression; dbSNP:rs766256429)	24001744
P20594	NPR2	S76P	S	76	P	-	germline	loss	UniProt	VARIANT S -> P (in SNSK; loss of C-type natriuretic peptide-induced signaling; dominant negative effect; loss of localization to the plasma membrane; dbSNP:rs796065355)	24001744
P20594	NPR2	R110C	R	110	C	-	germline	loss	UniProt	VARIANT R -> C (in SNSK; loss of C-type natriuretic peptide-induced signaling; dominant negative effect; retained in the endoplasmic reticulum; dbSNP:rs758478717)	24471569
P20594	NPR2	R263P	R	263	P	-	germline	loss	UniProt	VARIANT R -> P (in SNSK; loss of C-type natriuretic peptide-induced signaling; dominant negative effect; loss of localization to the plasma membrane; dbSNP:rs139036657)	24001744
P20594	NPR2	Q417E	Q	417	E	-	germline	loss	UniProt	VARIANT Q -> E (in SNSK; loss of C-type natriuretic peptide-induced signaling; dominant negative effect; no effect on cell surface expression; dbSNP:rs796065356)	24471569
Q9UHY1	NRBP1	V365I	V	365	I	-	germline	neutral	gnomAD	AF=3.55876e-03, allele-count=895, n-homozygotes=21	32461654
Q7Z2Y5	NRK	R727H	R	727	H	-	germline	neutral	gnomAD	AF=5.40465e-03, allele-count=730, n-homozygotes=21	32461654
P04629	NTRK1	K544N	K	544	N	96	experimental	loss	UniProt	MUTAGEN K->N: Loss of kinase activity.	1281417,8155326
P04629	NTRK1	L93P	L	93	P	-	germline	decrease	UniProt	VARIANT L -> P (in CIPA; aberrantly processed; shows diminished autophosphorylation in neuronal cells)	10982191,11159935
P04629	NTRK1	L213P	L	213	P	-	germline	decrease	UniProt	VARIANT L -> P (in CIPA; aberrantly processed; shows diminished autophosphorylation in neuronal cells; dbSNP:rs747711259)	10330344,11159935
P04629	NTRK1	G522E	G	522	E	43	germline	decrease	UniProt	VARIANT G -> E (in CIPA; no effect on N-glycosylation, nor on subcellular location; reduced basal autophosphorylation and complete loss of NGF-induced autophosphorylation; loss of NGF-stimulated calcium flux)	27676246
P04629	NTRK1	G522R	G	522	R	43	germline	decrease	UniProt	VARIANT G -> R (in CIPA; processed as wild-type but shows significantly diminished autophosphorylation in both neuronal and non-neuronal cells; dbSNP:rs1571699266)	10982191,11159935
P04629	NTRK1	R649W	R	649	W	424	germline	decrease	UniProt	VARIANT R -> W (in CIPA; processed as wild-type but shows significantly diminished autophosphorylation in both neuronal and non-neuronal cells; dbSNP:rs369353892)	10330344,11159935
P04629	NTRK1	R654C	R	654	C	430	germline	decrease	UniProt	VARIANT R -> C (in CIPA; processed as wild-type but shows significantly diminished autophosphorylation in both neuronal and non-neuronal cells; dbSNP:rs764992664)	10982191,11159935,22302274
P04629	NTRK1	L657P	L	657	P	433	germline	decrease	UniProt	VARIANT L -> P (in CIPA; following transfection in neuroblastoma cells and NGF treatment, loss of differentiation into neuronal phenotype; partially decreased N-glycosylation; reduced expression at the plasma membrane; reduced basal autophosphorylation and complete loss of NGF-induced autophosphorylation; loss of NGF-stimulated calcium flux)	27676246
P04629	NTRK1	I699T	I	699	T	546	germline	decrease	UniProt	VARIANT I -> T (in CIPA; partially decreased N-glycosylation; reduced expression at the plasma membrane; reduced basal autophosphorylation and complete loss of NGF-induced autophosphorylation; loss of NGF-stimulated calcium flux)	27676246
P04629	NTRK1	G714S	G	714	S	592	germline	decrease	UniProt	VARIANT G -> S (in CIPA; processed as wild-type but shows significantly diminished autophosphorylation in both neuronal and non-neuronal cells; dbSNP:rs770727871)	10330344,11159935
P04629	NTRK1	C763S	C	763	S	822	germline	decrease	UniProt	VARIANT C -> S (in CIPA; following transfection in neuroblastoma cells and NGF treatment, decreased percentage of cells differentiated into neuronal phenotype and reduced neurite length compared with wild-type; slightly decreased N-glycosylation; reduced expression at the plasma membrane; reduced basal and NGF-induced autophosphorylation; small reduction in NGF-stimulated calcium flux)	27676246
P04629	NTRK1	R771C	R	771	C	832	germline	decrease	UniProt	VARIANT R -> C (in CIPA; partially decreased N-glycosylation; reduced expression at the plasma membrane; reduced basal autophosphorylation and complete loss of NGF-induced autophosphorylation; loss of NGF-stimulated calcium flux; dbSNP:rs1324983370)	27676246
P04629	NTRK1	G577R	G	577	R	184	germline	loss	UniProt	VARIANT G -> R (in CIPA; loss of function; processed as wild-type but shows significantly diminished autophosphorylation in both neuronal and non-neuronal cells; dbSNP:rs121964866)	10567924,10982191,11159935,8696348
P04629	NTRK1	D596N	D	596	N	241	germline	loss	UniProt	VARIANT D -> N (in CIPA; abolishes autophosphorylation)	28177573
P04629	NTRK1	R780P	R	780	P	849	germline	loss	UniProt	VARIANT R -> P (in CIPA; loss of function; dbSNP:rs35669708)	10090906
P04629	NTRK1	H604Y	H	604	Y	256	germline	neutral	gnomAD	AF=4.16472e-02, allele-count=10359, n-homozygotes=292	32461654
P04629	NTRK1	G613V	G	613	V	349	germline	neutral	gnomAD	AF=4.16757e-02, allele-count=10381, n-homozygotes=291	32461654
P04629	NTRK1	T237M	T	237	M	-	germline	neutral	gnomAD	AF=4.00793e-03, allele-count=619, n-homozygotes=14	32461654
P04629	NTRK1	R444Q	R	444	Q	-	germline	neutral	gnomAD	AF=2.64851e-03, allele-count=666, n-homozygotes=18	32461654
P04629	NTRK1	G18E	G	18	E	-	germline	neutral	gnomAD	AF=7.45426e-03, allele-count=911, n-homozygotes=11	32461654
Q16620	NTRK2	Y706C	Y	706	C	507	germline	decrease	UniProt	VARIANT Y -> C (in OBHD; expressed normally on the cell surface; results in markedly impaired ligand-induced phosphorylation as well as impaired downstream MAPK1 phosphorylation; dbSNP:rs121434633)	15494731
Q16288	NTRK3	K572N	K	572	N	96	experimental	loss	UniProt	MUTAGEN K->N: Loss of autophosphorylation and loss of NTRK3 signaling.	25196463
Q16288	NTRK3	T93M	T	93	M	-	germline	decrease	UniProt	VARIANT T -> M (probable disease-associated variant found in patients with CHD; associated with CHD susceptibility; significantly reduced autophosphorylation; decreased NTRK3 signaling associated with decreased apoptosis in absence of NTF3; dbSNP:rs147992979)	25196463
O60285	NUAK1	K84A	K	84	A	96	experimental	loss	UniProt	MUTAGEN K->A: Abolishes kinase activity and ability to induce senescence.	19927127,21317932
O60285	NUAK1	T211A	T	211	A	529	experimental	loss	UniProt	MUTAGEN T->A: Prevents phosphorylation and activation by STK11/LKB1 complex. Abolishes ability to induce senescence.	14976552,19927127,21317932
O60285	NUAK1	S600A	S	600	A	-	experimental	loss	UniProt	MUTAGEN S->A: Abrogates phosphorylation by PKB/AKT1. Does not affect ability to induce senescence.	12409306,19927127
Q9H093	NUAK2	K81R	K	81	R	96	experimental	loss	UniProt	MUTAGEN K->R: Loss of autophosphorylation, kinase activity and of anti-apoptotic activity.	15345718
Q9H093	NUAK2	T208A	T	208	A	529	experimental	loss	UniProt	MUTAGEN T->A: Prevents phosphorylation and activation by STK11/LKB1 complex.	14976552
Q9H093	NUAK2	A516V	A	516	V	-	germline	neutral	gnomAD	AF=4.35605e-02, allele-count=9189, n-homozygotes=427	32461654
Q5VST9	OBSCN	A51T	A	51	T	-	germline	neutral	gnomAD	AF=0.348602, allele-count=160563, n-homozygotes=53020	32461654
Q5VST9	OBSCN	R4534H	R	4534	H	-	germline	neutral	gnomAD	AF=2.62257e-01, allele-count=64594, n-homozygotes=10020	32461654
Q5VST9	OBSCN	Q502R	Q	502	R	-	germline	neutral	gnomAD	AF=0.348602, allele-count=160563, n-homozygotes=53020	32461654
Q5VST9	OBSCN	A3300T	A	3300	T	-	germline	neutral	gnomAD	AF=2.89845e-01, allele-count=72231, n-homozygotes=10944	32461654
Q5VST9	OBSCN	H4381R	H	4381	R	-	germline	neutral	gnomAD	AF=0.309286, allele-count=154021, n-homozygotes=54061	32461654
Q5VST9	OBSCN	C4450R	C	4450	R	-	germline	neutral	gnomAD	AF=0.306969, allele-count=167062, n-homozygotes=58929	32461654
Q5VST9	OBSCN	K1027R	K	1027	R	-	germline	neutral	gnomAD	AF=1.11343e-02, allele-count=2775, n-homozygotes=96	32461654
Q5VST9	OBSCN	A1086S	A	1086	S	-	germline	neutral	gnomAD	AF=3.36221e-03, allele-count=836, n-homozygotes=28	32461654
Q5VST9	OBSCN	Q1248H	Q	1248	H	-	germline	neutral	gnomAD	AF=1.43025e-03, allele-count=355, n-homozygotes=4	32461654
Q5VST9	OBSCN	A1532V	A	1532	V	-	germline	neutral	gnomAD	AF=2.92975e-01, allele-count=72976, n-homozygotes=11032	32461654
Q5VST9	OBSCN	A908T	A	908	T	-	germline	neutral	gnomAD	AF=3.49355e-01, allele-count=86925, n-homozygotes=15838	32461654
Q5VST9	OBSCN	D2106E	D	2106	E	-	germline	neutral	gnomAD	AF=0.308536, allele-count=169103, n-homozygotes=59315	32461654
Q5VST9	OBSCN	F2116L	F	2116	L	-	germline	neutral	gnomAD	AF=0.317038, allele-count=166080, n-homozygotes=57407	32461654
Q5VST9	OBSCN	R2529Q	R	2529	Q	-	germline	neutral	gnomAD	AF=4.72661e-02, allele-count=10790, n-homozygotes=990	32461654
Q5VST9	OBSCN	V2720M	V	2720	M	-	germline	neutral	gnomAD	AF=2.93759e-01, allele-count=69984, n-homozygotes=10728	32461654
Q5VST9	OBSCN	R2812W	R	2812	W	-	germline	neutral	gnomAD	AF=4.72893e-02, allele-count=11603, n-homozygotes=887	32461654
Q5VST9	OBSCN	E3372D	E	3372	D	-	germline	neutral	gnomAD	AF=5.08916e-02, allele-count=12683, n-homozygotes=1204	32461654
Q5VST9	OBSCN	S3373C	S	3373	C	-	germline	neutral	gnomAD	AF=5.12404e-02, allele-count=12682, n-homozygotes=1204	32461654
Q5VST9	OBSCN	G4039R	G	4039	R	-	germline	neutral	gnomAD	AF=4.09899e-01, allele-count=101909, n-homozygotes=23032	32461654
Q5VST9	OBSCN	R4662C	R	4662	C	-	germline	neutral	gnomAD	AF=4.86885e-02, allele-count=12136, n-homozygotes=1206	32461654
Q5VST9	OBSCN	L5269V	L	5269	V	-	germline	neutral	gnomAD	AF=3.60106e-01, allele-count=62021, n-homozygotes=11883	32461654
Q5VST9	OBSCN	Q5891E	Q	5891	E	-	germline	neutral	gnomAD	AF=0.492753, allele-count=109256, n-homozygotes=28097	32461654
Q5VST9	OBSCN	A7172V	A	7172	V	-	germline	neutral	gnomAD	AF=0.483445, allele-count=97945, n-homozygotes=25905	32461654
Q5VST9	OBSCN	R4516W	R	4516	W	-	germline	neutral	gnomAD	AF=4.10287e-01, allele-count=53334, n-homozygotes=11571	32461654
O95747	OXSR1	K46A	K	46	A	96	experimental	loss	UniProt	MUTAGEN K->A: Loss of autophosphorylation and kinase activity.	14707132,16389068
O95747	OXSR1	K46M	K	46	M	96	experimental	loss	UniProt	MUTAGEN K->M: Loss of RELT, RELL1 and RELL2 phosphorylation. Retention of some autophosphorylation activity may be due to complex formation with other endogenous kinases in the assay.	14707132,16389068
O95747	OXSR1	T304I	T	304	I	865	germline	neutral	gnomAD	AF=1.26349e-01, allele-count=31416, n-homozygotes=2808	32461654
Q13153	PAK1	L107F	L	107	F	-	experimental	activating	UniProt	MUTAGEN L->F: Abolishes autoinhibition, leading to constitutive kinase activity.	10551809
Q13153	PAK1	T423E	T	423	E	529	experimental	activating	UniProt	MUTAGEN T->E: Constitutive kinase activity.	10551809
Q13153	PAK1	T423A	T	423	A	529	experimental	decrease	UniProt	MUTAGEN T->A: Decreases CDC42-stimulated activity and autophosphorylation.	10551809
Q13153	PAK1	D393A	D	393	A	430	experimental	loss	UniProt	MUTAGEN D->A: Abolishes autophosphorylation at Thr-423.	22153498
Q13153	PAK1	Y131C	Y	131	C	-	germline	increase	UniProt	VARIANT Y -> C (in IDDMSSD; gain of function; enhanced PAK1 kinase activity and significantly reduced homodimerization; dbSNP:rs1565638316)	30290153
Q13153	PAK1	Y429C	Y	429	C	539	germline	increase	UniProt	VARIANT Y -> C (in IDDMSSD; gain-of-function; enhanced PAK1 kinase activity and significantly reduced homodimerization; dbSNP:rs1565583382)	30290153
Q13177	PAK2	K278R	K	278	R	96	experimental	loss	UniProt	MUTAGEN K->R: Abolishes kinase activity and autophosphorylation.	9786869
Q13177	PAK2	T402A	T	402	A	529	experimental	loss	UniProt	MUTAGEN T->A: Abolishes kinase activity and greatly inhibits autophosphorylation of PAK-2p27 and PAK-2p34.	9786869
Q13177	PAK2	E435K	E	435	K	597	germline	loss	UniProt	VARIANT E -> K (in KNO2; loss of protein serine/threonine kinase activity)	33693784
O96013	PAK4	S445N	S	445	N	431	experimental	activating	UniProt	MUTAGEN S->N: Approximately 30-fold increased autophosphorylation (constitutively active mutant).	11313478
O96013	PAK4	S474E	S	474	E	529	experimental	increase	UniProt+PubMed	MUTAGEN S->E: Approximately 3-fold increased autophosphorylation.	11313478
O96013	PAK4	R135Q	R	135	Q	-	germline	neutral	gnomAD	AF=1.85925e-02, allele-count=2699, n-homozygotes=38	32461654
Q9NQU5	PAK6	M76V	M	76	V	-	germline	neutral	gnomAD	AF=1.05429e-01, allele-count=21369, n-homozygotes=1527	32461654
Q9NQU5	PAK6	H215R	H	215	R	-	germline	neutral	gnomAD	AF=1.05694e-01, allele-count=25916, n-homozygotes=1875	32461654
Q9NQU5	PAK6	P337L	P	337	L	-	germline	neutral	gnomAD	AF=1.13213e-01, allele-count=28331, n-homozygotes=1890	32461654
Q96RG2	PASK	R1058A	R	1058	A	156	experimental	decrease	UniProt	MUTAGEN R->A: Induces lower protein kinase activity.	20943661
Q96RG2	PASK	A1151K	A	1151	K	485	experimental	decrease	UniProt	MUTAGEN A->K: Induces lower protein kinase activity and ability to autophosphorylate.	20943661
Q96RG2	PASK	Y1152F	Y	1152	F	489	experimental	decrease	UniProt	MUTAGEN Y->F: Induces lower protein kinase activity.	20943661
Q96RG2	PASK	K1028R	K	1028	R	96	experimental	loss	UniProt	MUTAGEN K->R: Loss of autophosphorylating activity.	11459942,20943661
Q96RG2	PASK	T1161A	T	1161	A	529	experimental	loss	UniProt	MUTAGEN T->A: Loss of catalytic activity (PubMed:11459942). According to another report, does not affect the protein kinase activity (PubMed:20943661). Does not affect protein translation.	11459942,20943661,11459942,17595531,20943661
Q96RG2	PASK	T1165A	T	1165	A	536	experimental	loss	UniProt	MUTAGEN T->A: Loss of catalytic activity. Does not affect protein translation.	11459942,17595531
Q96RG2	PASK	V250I	V	250	I	-	germline	neutral	gnomAD	AF=3.16852e-01, allele-count=79384, n-homozygotes=13459	32461654
Q96RG2	PASK	L514S	L	514	S	-	germline	neutral	gnomAD	AF=5.56059e-02, allele-count=13984, n-homozygotes=1541	32461654
Q96RG2	PASK	V694M	V	694	M	-	germline	neutral	gnomAD	AF=6.47114e-03, allele-count=1623, n-homozygotes=71	32461654
Q96RG2	PASK	G725D	G	725	D	-	germline	neutral	gnomAD	AF=5.55454e-02, allele-count=13937, n-homozygotes=1524	32461654
Q96RG2	PASK	V1210M	V	1210	M	689	germline	neutral	gnomAD	AF=1.04967e-02, allele-count=2638, n-homozygotes=145	32461654
Q96RG2	PASK	E796K	E	796	K	-	germline	neutral	gnomAD	AF=1.90657e-02, allele-count=4794, n-homozygotes=61	32461654
Q96RG2	PASK	P844Q	P	844	Q	-	germline	neutral	gnomAD	AF=9.08592e-03, allele-count=2285, n-homozygotes=133	32461654
Q96RG2	PASK	R937H	R	937	H	-	germline	neutral	gnomAD	AF=8.80890e-03, allele-count=2203, n-homozygotes=26	32461654
Q96KB5	PBK	N107S	N	107	S	216	germline	neutral	gnomAD	AF=1.43155e-01, allele-count=35098, n-homozygotes=3491	32461654
Q96KB5	PBK	E220D	E	220	D	576	germline	neutral	gnomAD	AF=5.16809e-03, allele-count=1299, n-homozygotes=52	32461654
P16234	PDGFRA	V536E	V	536	E	-	experimental	activating	PubMed	VARIANT constitutively-active	30253204
P16234	PDGFRA	I537D	I	537	D	-	experimental	activating	PubMed	VARIANT constitutively-active	30253204
P16234	PDGFRA	Y731F	Y	731	F	298	experimental	decrease	UniProt	MUTAGEN Y->F: No effect on autophosphorylation and phosphorylation of PLCG1. Abolishes activation of phosphatidylinositol 3-kinase.	1646396
P16234	PDGFRA	Y742F	Y	742	F	310	experimental	decrease	UniProt	MUTAGEN Y->F: No effect on autophosphorylation and phosphorylation of PLCG1. Abolishes activation of phosphatidylinositol 3-kinase.	1646396
P16234	PDGFRA	S478P	S	478	P	-	germline	neutral	gnomAD	AF=1.54285e-01, allele-count=38733, n-homozygotes=3673	32461654
P16234	PDGFRA	G79D	G	79	D	-	germline	neutral	gnomAD	AF=8.88346e-03, allele-count=2233, n-homozygotes=16	32461654
P16234	PDGFRA	Y555C	Y	555	C	-	tumor-predisposition	activating	UniProt	VARIANT Y -> C (in GISTPS; increased platelet-derived growth factor alpha-receptor activity; constitutively activated kinase; dbSNP:rs121908589)	17087943
P16234	PDGFRA	D842V	D	842	V	491	somatic	activating	UniProt	VARIANT D -> V (in a GIST sample; imatinib resistant, constitutively activated kinase; dbSNP:rs121908585)	12522257,15928335,20972453
P16234	PDGFRA	D842Y	D	842	Y	491	somatic	activating	UniProt	VARIANT D -> Y (in a GIST sample; imatinib sensitive, constitutively activated kinase; dbSNP:rs121913265)	15928335
P16234	PDGFRA	N659K	N	659	K	180	somatic	activating	UniProt	VARIANT N -> K (in GIST sample; constitutively activated kinase; dbSNP:rs1057519700)	15928335
P16234	PDGFRA	V561D	V	561	D	-	somatic	activating	UniProt	VARIANT V -> D (in a GIST sample; constitutively activated kinase; dbSNP:rs121908586)	12522257,15928335
P16234	PDGFRA	D842V	D	842	V	491	somatic	resistance	COSMIC	-	-
P16234	PDGFRA	H650Q	H	650	Q	156	unclear	activating	UniProt	VARIANT H -> Q (in a hypereosinophilic syndrome sample; constitutively activated kinase)	21224473
P16234	PDGFRA	N659S	N	659	S	180	unclear	activating	UniProt	VARIANT N -> S (in a hypereosinophilic syndrome sample; constitutively activated kinase)	21224473
P16234	PDGFRA	R748G	R	748	G	316	unclear	activating	UniProt	VARIANT R -> G (in a hypereosinophilic syndrome sample; constitutively activated kinase)	21224473
P16234	PDGFRA	Y849S	Y	849	S	508	unclear	activating	UniProt	VARIANT Y -> S (in a hypereosinophilic syndrome sample; constitutively activated kinase)	21224473
P09619	PDGFRB	Y579F	Y	579	F	9	experimental	decrease	UniProt	MUTAGEN Y->F: Loss of kinase activity; when associated with F-581. Strongly reduces interaction with SRC family kinases. No effect on interaction with GRB10.	104,545,687,685,273
P09619	PDGFRB	Y581F	Y	581	F	11	experimental	decrease	UniProt	MUTAGEN Y->F: Loss of kinase activity; when associated with F-579. No effect on interaction with GRB10.	104,545,687,685,273
P09619	PDGFRB	Y857F	Y	857	F	508	experimental	decrease	UniProt	MUTAGEN Y->F: Reduces kinase activity. No effect on interaction with GRB10. Abolishes interaction with RASA1. No effect on phosphatidylinositol 3-kinase activity.	10454568,1314164,1653029,20494825
P09619	PDGFRB	K634A	K	634	A	96	experimental	loss	UniProt	MUTAGEN K->A,R: Loss of kinase activity. Abolishes interaction with RASA1. No effect on phosphatidylinositol 3-kinase activity.	1314164,1846866,20494825
P09619	PDGFRB	K634R	K	634	R	96	experimental	loss	UniProt	MUTAGEN K->A,R: Loss of kinase activity. Abolishes interaction with RASA1. No effect on phosphatidylinositol 3-kinase activity.	1314164,1846866,20494825
P09619	PDGFRB	V665A	V	665	A	179	germline	activating	UniProt	VARIANT V -> A (in PENTT; gain of function in protein tyrosine kinase activity; shows ligand-independent constitutive signaling; dbSNP:rs1554108211)	26279204
P09619	PDGFRB	N666H	N	666	H	180	germline	activating	PubMed	VARIANT constitutively-active	28726812
P09619	PDGFRB	L658P	L	658	P	159	germline	loss	UniProt	VARIANT L -> P (in IBGC4; no effect on protein abundance; loss of PDGF beta receptor activity; dbSNP:rs397509381)	23255827,24065723,26599395
P09619	PDGFRB	I29F	I	29	F	-	germline	neutral	gnomAD	AF=3.80536e-02, allele-count=7455, n-homozygotes=540	32461654
P09619	PDGFRB	E485K	E	485	K	-	germline	neutral	gnomAD	AF=1.95367e-02, allele-count=4912, n-homozygotes=74	32461654
P09619	PDGFRB	P345S	P	345	S	-	germline	neutral	gnomAD	AF=7.35586e-03, allele-count=1780, n-homozygotes=9	32461654
Q15118	PDK1	A134T	A	134	T	-	germline	neutral	gnomAD	AF=1.46665e-03, allele-count=368, n-homozygotes=2	32461654
Q15120	PDK3	R158H	R	158	H	-	germline	activating	UniProt	VARIANT R -> H (in CMTX6; gain of function; results in a 5-fold increase in kinase activity, decreased sensitivity to pyruvate inhibition, reduced affinity for nucleotides and increased affinity for pyruvate dehydrogenase complex component E2 (PDC-E2), leading to PDC hyperphosphorylation and increased inactivation; dbSNP:rs397515323)	23297365
Q16654	PDK4	Y157F	Y	157	F	-	experimental	loss	UniProt	MUTAGEN Y->F: Loss of activity.	18658136
Q16654	PDK4	R161A	R	161	A	-	experimental	loss	UniProt	MUTAGEN R->A: Loss of activity.	18658136
O15530	PDPK1	Y9F	Y	9	F	-	experimental	decrease	UniProt	MUTAGEN Y->F: Slight reduction in pervanadate-stimulated tyrosine phosphorylation.	11481331
O15530	PDPK1	Y373F	Y	373	F	-	experimental	decrease	UniProt	MUTAGEN Y->F: Reduction in basal activity.	11481331
O15530	PDPK1	Y376F	Y	376	F	-	experimental	decrease	UniProt	MUTAGEN Y->F: Reduction in basal activity.	11481331
O15530	PDPK1	A277V	A	277	V	601	experimental	increase	UniProt	MUTAGEN A->V: 3-fold increase in kinase activity.	10364160
O15530	PDPK1	T513E	T	513	E	-	experimental	increase	UniProt	MUTAGEN T->E: Enhanced kinase activity towards PKB.	20978239
O15530	PDPK1	T354A	T	354	A	876	experimental	increase	UniProt	MUTAGEN T->A: Abolishes phosphorylation by MELK.	22544756
O15530	PDPK1	S241A	S	241	A	529	experimental	loss	UniProt	MUTAGEN S->A: No activation.	10455013
Q9H792	PEAK1	S440P	S	440	P	-	germline	neutral	gnomAD	AF=3.49269e-03, allele-count=871, n-homozygotes=12	32461654
Q9H792	PEAK1	R1071K	R	1071	K	-	germline	neutral	gnomAD	AF=2.95726e-01, allele-count=73766, n-homozygotes=12153	32461654
Q9H792	PEAK1	T1077P	T	1077	P	-	germline	neutral	gnomAD	AF=1.87566e-03, allele-count=468, n-homozygotes=8	32461654
Q9H792	PEAK1	P1408Q	P	1408	Q	-	germline	neutral	gnomAD	AF=9.18538e-03, allele-count=2291, n-homozygotes=59	32461654
Q9H792	PEAK1	S1542T	S	1542	T	-	germline	neutral	gnomAD	AF=2.52503e-01, allele-count=62649, n-homozygotes=8333	32461654
Q99570	PIK3R4	L699V	L	699	V	-	germline	neutral	gnomAD	AF=4.50332e-03, allele-count=1132, n-homozygotes=11	32461654
P11309	PIM1	P81S	P	81	S	124	experimental	decrease	UniProt	MUTAGEN P->S: Decreased kinase activity.	15808862
P11309	PIM1	N82K	N	82	K	142	experimental	decrease	UniProt	MUTAGEN N->K: Decreased kinase activity.	15808862
P11309	PIM1	L193F	L	193	F	492	experimental	decrease	UniProt	MUTAGEN L->F: Decreased kinase activity.	15808862
P11309	PIM1	H68Y	H	68	Y	97	experimental	increase	UniProt	MUTAGEN H->Y: Increased kinase activity.	15808862
Q9BXM7	PINK1	D384N	D	384	N	479	experimental	loss	UniProt	MUTAGEN D->N: Loss of activity. Abolishes Drp1 phosphorylation. No effect on localization to mitochondria.	32484300
Q9BXM7	PINK1	T313M	T	313	M	219	germline	decrease	UniProt	VARIANT T -> M (in PARK6; decreases PRKN and SNCAIP ubiquitination and degradation; slightly decreases Drp1 phosphorylation; dbSNP:rs74315359)	17030667,18785233,19229105,32484300
Q9BXM7	PINK1	G309D	G	309	D	215	germline	decrease	UniProt	VARIANT G -> D (in PARK6; fails to maintain mitochondrial membrane potential; full-length mutant has no effect on autophosphorylation; strongly reduces interaction with PRKN; decreases PRKN and SNCAIP ubiquitination and degradation; decreases Drp1 phosphorylation; dbSNP:rs74315355)	15087508,16207731,19229105,20798600,32484300
Q9BXM7	PINK1	L347P	L	347	P	382	germline	decrease	UniProt	VARIANT L -> P (in PARK6; strongly reduces interaction with PRKN; reduced ubiquitination of MIRO1; dbSNP:rs28940285)	15349870,15596610,20798600,22396657,22956510
Q9BXM7	PINK1	P399L	P	399	L	510	germline	decrease	UniProt	VARIANT P -> L (probable disease-associated variant found in early-onset Parkinson disease with digenic inheritance; found in a patient also carrying mutation S-39 in PARK7; decreases PRKN and SNCAIP ubiquitination and degradation; dbSNP:rs119451946)	16632486,19229105
Q9BXM7	PINK1	G386A	G	386	A	481	germline	loss	UniProt	VARIANT G -> A (in PARK6; abolishes kinase activity)	16401616,24784582
Q9BXM7	PINK1	A340T	A	340	T	372	germline	neutral	gnomAD	AF=9.21398e-02, allele-count=23161, n-homozygotes=1876	32461654
Q9BXM7	PINK1	N521T	N	521	T	870	germline	neutral	gnomAD	AF=2.92293e-01, allele-count=73476, n-homozygotes=11210	32461654
Q9BXM7	PINK1	Q115L	Q	115	L	-	germline	neutral	gnomAD	AF=3.32601e-02, allele-count=6238, n-homozygotes=147	32461654
Q9BXM7	PINK1	G411S	G	411	S	538	germline	neutral	gnomAD	AF=1.78069e-03, allele-count=447, n-homozygotes=4	32461654
Q9BXM7	PINK1	E476K	E	476	K	701	germline	neutral	gnomAD	AF=3.12697e-03, allele-count=785, n-homozygotes=18	32461654
Q99640	PKMYT1	N238A	N	238	A	431	experimental	loss	UniProt	MUTAGEN N->A: Loss of kinase activity.	10373560
Q99640	PKMYT1	D251A	D	251	A	479	experimental	loss	UniProt	MUTAGEN D->A: Loss of kinase activity.	10504341
Q16512	PKN1	K644R	K	644	R	96	experimental	decrease	UniProt	MUTAGEN K->R: Substantial reduction of autophosphorylation.	18066052,8135837
Q16512	PKN1	K644E	K	644	E	96	experimental	loss	UniProt	MUTAGEN K->E: Abolishes Serine/threonine-protein kinase activity.	18066052,8135837
Q16512	PKN1	D451A	D	451	A	-	experimental	loss	UniProt	MUTAGEN D->A: Abolishes cleavage by caspase-3 and formation of 70 kDa fragment.	9751706
Q16512	PKN1	D454A	D	454	A	-	experimental	loss	UniProt	MUTAGEN D->A: Abolishes cleavage by caspase-3 and formation of 70 kDa fragment.	9751706
Q16512	PKN1	D558A	D	558	A	-	experimental	loss	UniProt	MUTAGEN D->A: Abolishes cleavage by caspase-3 and formation of AF3 fragment.	9751706
Q16512	PKN1	D560A	D	560	A	-	experimental	loss	UniProt	MUTAGEN D->A: Abolishes cleavage by caspase-3 and formation of AF3 fragment.	9751706
Q16512	PKN1	V901I	V	901	I	879	germline	neutral	gnomAD	AF=1.76600e-01, allele-count=40735, n-homozygotes=7911	32461654
Q16512	PKN1	R436W	R	436	W	-	germline	neutral	gnomAD	AF=1.17467e-03, allele-count=293, n-homozygotes=6	32461654
Q16512	PKN1	R635Q	R	635	Q	59	germline	neutral	gnomAD	AF=2.65598e-02, allele-count=6627, n-homozygotes=118	32461654
Q16513	PKN2	T816A	T	816	A	529	experimental	decrease	UniProt	MUTAGEN T->A: Reduces catalytic activity.	18835241
Q16513	PKN2	F977W	F	977	W	-	experimental	decrease	UniProt	MUTAGEN F->W,Y: Reduces catalytic activity by 50%.	10226025,18835241
Q16513	PKN2	Y979A	Y	979	A	-	experimental	decrease	UniProt	MUTAGEN Y->A: Reduces catalytic activity by 50%.	10226025,18835241
Q16513	PKN2	Y979F	Y	979	F	-	experimental	decrease	UniProt	MUTAGEN Y->F,L,W: Reduces catalytic activity by 25%.	10226025,18835241
Q16513	PKN2	F977A	F	977	A	-	experimental	decrease	UniProt	MUTAGEN F->A,L: Abolishes interaction with PDPK1 and prevents the phosphorylation of AKT1 at 'Ser-473'. Reduces catalytic activity by 90%.	10226025,18835241
Q16513	PKN2	F977L	F	977	L	-	experimental	decrease	UniProt	MUTAGEN F->A,L: Abolishes interaction with PDPK1 and prevents the phosphorylation of AKT1 at 'Ser-473'. Reduces catalytic activity by 90%.	10226025,18835241
Q16513	PKN2	F977Y	F	977	Y	-	experimental	decrease	UniProt	MUTAGEN F->W,Y: Reduces catalytic activity by 50%.	10226025,18835241
Q16513	PKN2	Y979L	Y	979	L	-	experimental	decrease	UniProt	MUTAGEN Y->F,L,W: Reduces catalytic activity by 25%.	10226025,18835241
Q16513	PKN2	Y979W	Y	979	W	-	experimental	decrease	UniProt	MUTAGEN Y->F,L,W: Reduces catalytic activity by 25%.	10226025,18835241
Q16513	PKN2	T958A	T	958	A	-	experimental	loss	UniProt	MUTAGEN T->A: Abolishes catalytic activity.	18835241
Q16513	PKN2	Q655R	Q	655	R	25	germline	neutral	gnomAD	AF=1.87090e-03, allele-count=465, n-homozygotes=4	32461654
Q6P5Z2	PKN3	K588E	K	588	E	96	experimental	loss	UniProt	MUTAGEN K->E: Abolishes autophosphorylation and catalytic activity.	10441506,15282551
Q6P5Z2	PKN3	K588R	K	588	R	96	experimental	loss	UniProt	MUTAGEN K->R: Abolishes catalytic activity.	10441506,15282551
Q6P5Z2	PKN3	T718A	T	718	A	529	experimental	loss	UniProt	MUTAGEN T->A: Abolishes phosphorylation.	15282551
P53350	PLK1	T210V	T	210	V	529	experimental	decrease	UniProt	MUTAGEN T->V: Reduced catalytic activity, but no effect on affinity for ATP.	12207013,12447691,17461553,18615013,19160488
P53350	PLK1	S137D	S	137	D	241	experimental	increase	UniProt	MUTAGEN S->D: Increases activity. Results in a block in G1/S.	12207013,18615013
P53350	PLK1	T210D	T	210	D	529	experimental	increase	UniProt+PubMed	MUTAGEN T->D: Increases activity and restores recovery after
P53350	PLK1	D176N	D	176	N	426	experimental	loss	UniProt	MUTAGEN D->N: Abolishes kinase activity.	18615013
P53350	PLK1	T210A	T	210	A	529	experimental	loss	UniProt	MUTAGEN T->A: Abolishes activity. Abolishes checkpoint recovery.	12207013,12447691,17461553,18615013,19160488
P53350	PLK1	K82M	K	82	M	96	experimental	loss	UniProt	MUTAGEN K->M: Loss of kinase activity. No effect on S-phase progression.	12207013,12447691,18174154,24018379
P53350	PLK1	K82R	K	82	R	96	experimental	loss	UniProt	MUTAGEN K->R: Loss of kinase activity. No effect on RIOK2-binding.	18615013,19160488,21880710
P53350	PLK1	L261F	L	261	F	676	germline	neutral	gnomAD	AF=2.70470e-03, allele-count=680, n-homozygotes=5	32461654
P53350	PLK1	L463H	L	463	H	-	germline	neutral	gnomAD	AF=6.09033e-03, allele-count=1531, n-homozygotes=14	32461654
Q9NYY3	PLK2	N210A	N	210	A	431	experimental	loss	UniProt	MUTAGEN N->A: Loss of kinase activity.	19001868
Q9H4B4	PLK3	K91R	K	91	R	96	experimental	loss	UniProt	MUTAGEN K->R: Kinase defective mutant, abolishes activity.	11447225,14980500,17804415,19103756,19490146,20889502,20940307
Q9H4B4	PLK3	D203A	D	203	A	479	experimental	loss	UniProt	MUTAGEN D->A: Kinase defective mutant, abolishes activity.	11156373
Q9H4B4	PLK3	T219E	T	219	E	529	experimental	loss	UniProt	MUTAGEN T->E: Kinase-defective mutant.	16478733
O00444	PLK4	T170D	T	170	D	529	experimental	activating	UniProt	MUTAGEN T->D: Activating mutant.	18239451,19164942
O00444	PLK4	K41M	K	41	M	96	experimental	loss	UniProt	MUTAGEN K->M: Abolishes ability to phosphorylate CDC25C and CHEK2.	18239451,19164942
O00444	PLK4	D154A	D	154	A	479	experimental	loss	UniProt	MUTAGEN D->A: Catalytically inactive mutant that causes some centrosome amplification above background levels when overexpressed.	16244668
O00444	PLK4	S232T	S	232	T	701	germline	neutral	gnomAD	AF=0.296891, allele-count=176735, n-homozygotes=62520	32461654
O00444	PLK4	W519S	W	519	S	-	germline	neutral	gnomAD	AF=1.15992e-02, allele-count=2915, n-homozygotes=39	32461654
O00444	PLK4	E830D	E	830	D	-	germline	neutral	gnomAD	AF=0.296814, allele-count=176646, n-homozygotes=62506	32461654
Q9H5K3	POMK	L137R	L	137	R	182	germline	loss	UniProt	VARIANT L -> R (in MDDGA12; loss of kinase activity; dbSNP:rs397509385)	23519211,23929950
Q13131	PRKAA1	V307G	V	307	G	880	experimental	activating	UniProt	MUTAGEN V->G,Q: Activates the kinase activity.	17088252
Q13131	PRKAA1	V307Q	V	307	Q	880	experimental	increase	UniProt	MUTAGEN V->G,Q: Activates the kinase activity.	17088252
P17612	PRKACA	R195A	R	195	A	503	experimental	decrease	UniProt	MUTAGEN R->A: No phosphorylation.	12372837
P17612	PRKACA	Y205A	Y	205	A	540	experimental	decrease	UniProt	MUTAGEN Y->A: Loss of allosteric regulation.	18178622
P17612	PRKACA	G201A	G	201	A	535	experimental	loss	UniProt	MUTAGEN G->A: No phosphorylation.	12372837
P17612	PRKACA	T202A	T	202	A	536	experimental	loss	UniProt	MUTAGEN T->A: No phosphorylation.	12372837
P17612	PRKACA	R46Q	R	46	Q	33	germline	neutral	gnomAD	AF=1.98091e-03, allele-count=498, n-homozygotes=4	32461654
P17612	PRKACA	L206R	L	206	R	541	somatic	activating	UniProt+PubMed	VARIANT L -> R (in PPNAD4; somatic mutation; the mutation results in cAMP-independent basal protein kinase activity and constitutive activation of protein kinase A; dbSNP:rs386352352)	24571724,24700472,24747643,24855271
P22694	PRKACB	H88R	H	88	R	145	germline	increase	UniProt	VARIANT H -> R (in CAFD2; increased sensitivity to cAMP activation; dbSNP:rs768056300)	33058759
P22694	PRKACB	G235R	G	235	R	604	germline	increase	UniProt	VARIANT G -> R (in CAFD2; increased sensitivity to cAMP activation; decreased interaction with regulatory subunits PRKAR1A and PRKAR2B)	33058759
P22612	PRKACG	I74M	I	74	M	97	germline	decrease	UniProt	VARIANT I -> M (in BDPLT19; patient platelets show impaired activation; dbSNP:rs724159972)	25061177
P22612	PRKACG	H268D	H	268	D	816	germline	neutral	gnomAD	AF=2.68079e-01, allele-count=67386, n-homozygotes=9776	32461654
P17252	PRKCA	V568I	V	568	I	818	germline	neutral	gnomAD	AF=0.0198079999999999, allele-count=246479, n-homozygotes=120825	32461654
Q05655	PRKCD	S299A	S	299	A	-	experimental	loss	UniProt	MUTAGEN S->A: Loss of phosphorylation.	17603046
Q02156	PRKCE	S729A	S	729	A	-	experimental	decrease	UniProt	MUTAGEN S->A: Enhances T-566 dephosphorylation.	11964154
Q02156	PRKCE	K437W	K	437	W	96	experimental	loss	UniProt	MUTAGEN K->W: Abolishes activity and S-729 phosphorylation.	11964154
Q02156	PRKCE	T566A	T	566	A	529	experimental	loss	UniProt	MUTAGEN T->A: Abolishes phosphorylation by PDK1, and S-729 phosphorylation.	11964154
Q02156	PRKCE	T563M	T	563	M	507	germline	neutral	gnomAD	AF=3.79206e-03, allele-count=899, n-homozygotes=18	32461654
Q02156	PRKCE	A654T	A	654	T	837	germline	neutral	gnomAD	AF=3.25459e-03, allele-count=769, n-homozygotes=19	32461654
P24723	PRKCH	V374I	V	374	I	55	germline	increase	UniProt	VARIANT V -> I (associated with susceptibility to ischemic stroke; increases autophosphorylation and kinase activity; dbSNP:rs2230500)	17206144,17344846
P24723	PRKCH	V374I	V	374	I	55	germline	neutral	gnomAD	AF=3.07924e-02, allele-count=7738, n-homozygotes=678	32461654
P24723	PRKCH	A19V	A	19	V	-	germline	neutral	gnomAD	AF=2.26760e-03, allele-count=545, n-homozygotes=3	32461654
P41743	PRKCI	D72A	D	72	A	-	experimental	decrease	UniProt	MUTAGEN D->A: Loss of interaction with ECT2, PARD6A and with SQSTM1.	15143057,15590654,19617897
P41743	PRKCI	K274W	K	274	W	59	experimental	loss	UniProt	MUTAGEN K->W: Abolishes activity.	10906326
Q04759	PRKCQ	A148E	A	148	E	-	experimental	activating	UniProt	MUTAGEN A->E: Constitutively active form.	10652356
Q04759	PRKCQ	S676A	S	676	A	-	experimental	decrease	UniProt	MUTAGEN S->A: Reduction in kinase activity.	16252004
Q04759	PRKCQ	S695A	S	695	A	-	experimental	decrease	UniProt	MUTAGEN S->A: Reduction in kinase activity.	11772397,16252004
Q04759	PRKCQ	K409A	K	409	A	96	experimental	loss	UniProt	MUTAGEN K->A,E: Loss of kinase activity.	10652356
Q04759	PRKCQ	T538A	T	538	A	529	experimental	loss	UniProt	MUTAGEN T->A: Loss of kinase activity.	11772397,16252004
Q04759	PRKCQ	K409E	K	409	E	96	experimental	loss	UniProt	MUTAGEN K->A,E: Loss of kinase activity.	10652356
Q04759	PRKCQ	P330L	P	330	L	-	germline	neutral	gnomAD	AF=3.05334e-01, allele-count=76764, n-homozygotes=12789	32461654
Q05513	PRKCZ	D62A	D	62	A	-	experimental	decrease	UniProt	MUTAGEN D->A: Loss of interaction with SQSTM1 and PARD6B.	12887891
Q05513	PRKCZ	D66A	D	66	A	-	experimental	decrease	UniProt	MUTAGEN D->A: Loss of interaction with SQSTM1 and PARD6B.	12887891
Q05513	PRKCZ	R49H	R	49	H	-	germline	neutral	gnomAD	AF=1.83993e-03, allele-count=462, n-homozygotes=5	32461654
Q15139	PRKD1	Y463E	Y	463	E	-	experimental	activating	UniProt	MUTAGEN Y->E: Constitutive activation and constitutive phosphorylation of S-738 and S-742.	12637538
Q15139	PRKD1	Y463F	Y	463	F	-	experimental	decrease	UniProt	MUTAGEN Y->F: Decreased phosphorylation level when coexpressed with either SRC or ABL in HeLa cells. Decreased kinase activity.	12637538
Q15139	PRKD1	Y502E	Y	502	E	-	experimental	loss	UniProt	MUTAGEN Y->E: Loss of activation.	12637538
Q15139	PRKD1	K612W	K	612	W	96	experimental	loss	UniProt	MUTAGEN K->W: Loss of kinase activity.	12637538
Q15139	PRKD1	R603H	R	603	H	59	germline	activating	PubMed	VARIANT constitutively-active	32817298
Q15139	PRKD1	H891R	H	891	R	-	germline	neutral	gnomAD	AF=1.20052e-02, allele-count=3013, n-homozygotes=30	32461654
Q9BZL6	PRKD2	Y438F	Y	438	F	-	experimental	decrease	UniProt	MUTAGEN Y->F: Loss of phosphorylation. No effect on phosphorylation of Tyr-717 and on Ser-706 or/and Ser-710 phosphorylation.	15604256,28428613
Q9BZL6	PRKD2	Y438D	Y	438	D	-	experimental	increase	UniProt	MUTAGEN Y->D: Slight increase in Tyr-717 phosphorylation. No effect on Ser-706 or/and Ser-710 phosphorylation. Increase in Tyr-717 phosphorylation; when associated with E-706 and E-710.	28428613
Q9BZL6	PRKD2	D695A	D	695	A	479	experimental	loss	UniProt	MUTAGEN D->A: Loss of kinase activity.	23503467
Q9BZL6	PRKD2	Y717F	Y	717	F	540	experimental	loss	UniProt	MUTAGEN Y->F: Abolishes phosphorylation. Decreases substrate affinity and increases catalytic efficiency. Increases Ser-706 or/and Ser-710 phosphorylation. Increases NF-kappa-B activation in response to oxidative stress.	28428613
O94806	PRKD3	N42D	N	42	D	-	germline	neutral	gnomAD	AF=3.83248e-02, allele-count=9638, n-homozygotes=254	32461654
O94806	PRKD3	P225S	P	225	S	-	germline	neutral	gnomAD	AF=2.10783e-03, allele-count=530, n-homozygotes=2	32461654
O94806	PRKD3	L445I	L	445	I	-	germline	neutral	gnomAD	AF=7.38075e-03, allele-count=1823, n-homozygotes=21	32461654
P78527	PRKDC	L1510P	L	1510	P	-	experimental	decrease	UniProt	MUTAGEN L->P: Loss of interaction with C1D.	9679063
P78527	PRKDC	A3574V	A	3574	V	-	germline	loss	UniProt	VARIANT A -> V (in IMD26; shows impaired function in response to irradiation and a less severe defect in V(D)J end-joining suggesting that the missense mutation retained some functional capacity; consistent with a loss of function mutation; dbSNP:rs587777686)	23722905
P78527	PRKDC	M333I	M	333	I	-	germline	neutral	gnomAD	AF=3.34648e-02, allele-count=8026, n-homozygotes=226	32461654
P78527	PRKDC	T605S	T	605	S	-	germline	neutral	gnomAD	AF=6.23258e-03, allele-count=1319, n-homozygotes=47	32461654
P78527	PRKDC	I680M	I	680	M	-	germline	neutral	gnomAD	AF=2.48031e-03, allele-count=580, n-homozygotes=9	32461654
P78527	PRKDC	N1071S	N	1071	S	-	germline	neutral	gnomAD	AF=3.67983e-03, allele-count=911, n-homozygotes=14	32461654
P78527	PRKDC	Q1603H	Q	1603	H	-	germline	neutral	gnomAD	AF=4.05281e-03, allele-count=1010, n-homozygotes=17	32461654
P78527	PRKDC	R2899C	R	2899	C	-	germline	neutral	gnomAD	AF=3.83014e-02, allele-count=9421, n-homozygotes=266	32461654
P78527	PRKDC	P3201S	P	3201	S	-	germline	neutral	gnomAD	AF=6.47450e-03, allele-count=1575, n-homozygotes=11	32461654
P78527	PRKDC	G3404E	G	3404	E	-	germline	neutral	gnomAD	AF=1.15290e-02, allele-count=2866, n-homozygotes=32	32461654
P78527	PRKDC	I3434T	I	3434	T	-	germline	neutral	gnomAD	AF=1.19429e-01, allele-count=27068, n-homozygotes=3007	32461654
P78527	PRKDC	N3459S	N	3459	S	-	germline	neutral	gnomAD	AF=2.49948e-03, allele-count=620, n-homozygotes=11	32461654
P78527	PRKDC	L3562M	L	3562	M	-	germline	neutral	gnomAD	AF=7.45593e-03, allele-count=1697, n-homozygotes=39	32461654
P78527	PRKDC	P3836L	P	3836	L	-	germline	neutral	gnomAD	AF=2.05360e-03, allele-count=457, n-homozygotes=7	32461654
P78527	PRKDC	T3198S	T	3198	S	-	germline	neutral	gnomAD	AF=1.74695e-03, allele-count=422, n-homozygotes=5	32461654
Q13976	PRKG1	R177Q	R	177	Q	-	germline	activating	UniProt+PubMed	VARIANT R -> Q (in AAT8; impairs cGMP binding; the mutant protein is constitutively active; dbSNP:rs397515330)	23910461
Q13976	PRKG1	N267S	N	267	S	-	germline	neutral	gnomAD	AF=4.27950e-02, allele-count=9722, n-homozygotes=228	32461654
P51817	PRKX	R283L	R	283	L	827	experimental	increase	UniProt	MUTAGEN R->L: Increases the affinity for PRKAR2A and PRKAR2B.	20819953
P51817	PRKX	K78R	K	78	R	96	experimental	loss	UniProt	MUTAGEN K->R: Loss of function.	12082174
P51817	PRKX	V43A	V	43	A	23	germline	neutral	gnomAD	AF=4.95221e-01, allele-count=46834, n-homozygotes=10556	32461654
Q13523	PRPF4B	I83V	I	83	V	-	germline	neutral	gnomAD	AF=0.301182, allele-count=171047, n-homozygotes=59974	32461654
P11801	PSKH1	D218A	D	218	A	426	experimental	decrease	UniProt	MUTAGEN D->A: Loss of autophosphorylation.	11087665
Q96QS6	PSKH2	R79K	R	79	K	48	germline	neutral	gnomAD	AF=1.10746e-02, allele-count=2780, n-homozygotes=25	32461654
Q96QS6	PSKH2	Q132R	Q	132	R	219	germline	neutral	gnomAD	AF=2.42976e-02, allele-count=6109, n-homozygotes=774	32461654
Q96QS6	PSKH2	A176S	A	176	S	402	germline	neutral	gnomAD	AF=3.46129e-01, allele-count=86956, n-homozygotes=15936	32461654
Q96QS6	PSKH2	G211R	G	211	R	492	germline	neutral	gnomAD	AF=1.25796e-03, allele-count=316, n-homozygotes=2	32461654
Q96QS6	PSKH2	T225A	T	225	A	536	germline	neutral	gnomAD	AF=1.52815e-03, allele-count=384, n-homozygotes=2	32461654
Q96QS6	PSKH2	S266R	S	266	R	637	germline	neutral	gnomAD	AF=8.94271e-03, allele-count=2247, n-homozygotes=56	32461654
Q96QS6	PSKH2	I336V	I	336	V	868	germline	neutral	gnomAD	AF=1.87767e-02, allele-count=4722, n-homozygotes=256	32461654
Q05397	PTK2	Y397F	Y	397	F	6	experimental	decrease	UniProt	MUTAGEN Y->F: Abolishes autophosphorylation. Abolishes interaction with SRC and activation of BMX. Reduces phosphorylation of NEDD9.	113,318,709,360,983
Q05397	PTK2	V928G	V	928	G	-	experimental	decrease	UniProt	MUTAGEN V->G: Loss of interaction with TGFB1I1.	9756887
Q05397	PTK2	L1034S	L	1034	S	-	experimental	decrease	UniProt	MUTAGEN L->S: Loss of interaction with TGFB1I1.	9756887
Q14289	PTK2B	Y881F	Y	881	F	-	experimental	decrease	UniProt	MUTAGEN Y->F: Loss of phosphorylation site. Strongly reduced interaction with GRB2.	20521079
Q14289	PTK2B	K457A	K	457	A	96	experimental	loss	UniProt	MUTAGEN K->A: Abolishes kinase activity.	15166227
Q14289	PTK2B	Y402F	Y	402	F	7	experimental	loss	UniProt	MUTAGEN Y->F: Abolishes autophosphorylation. Abolishes interaction with SRC.	8849729
Q14289	PTK2B	K838T	K	838	T	-	germline	neutral	gnomAD	AF=4.39959e-01, allele-count=110509, n-homozygotes=25092	32461654
Q14289	PTK2B	Q359E	Q	359	E	-	germline	neutral	gnomAD	AF=2.51072e-03, allele-count=631, n-homozygotes=3	32461654
Q13882	PTK6	W44A	W	44	A	-	experimental	decrease	UniProt	MUTAGEN W->A: Strong decrease in STAP2 phosphorylation. Markedly decreased interaction between SH3 domain the linker region.	10980601,17822667
Q13882	PTK6	Y66A	Y	66	A	-	experimental	decrease	UniProt	MUTAGEN Y->A: Decrease in STAP2 phosphorylation.	10980601
Q13882	PTK6	R105L	R	105	L	-	experimental	decrease	UniProt	MUTAGEN R->L: Decrease in STAP2 phosphorylation.	10980601
Q13882	PTK6	Y342A	Y	342	A	524	experimental	decrease	UniProt	MUTAGEN Y->A: 3-fold lower specific kinase activity. Decreased, but still significant, autophosphorylation. Decreased, but still significant, autophosphorylation; when associated with A-447.	12121988
Q13882	PTK6	Y447F	Y	447	F	856	experimental	increase	UniProt	MUTAGEN Y->F: Decrease in transforming potential and increase in the kinase activity level. Decreased, but still significant, autophosphorylation; when associated with A-342.	12121988,15471878,8940083
Q13882	PTK6	W184A	W	184	A	23	experimental	loss	UniProt	MUTAGEN W->A: Abrogates interaction between PTK6-domain kinase and PTK6-linker. Abrogates autophosphorylation and phosphorylation of KHDRBS1.	15961400
Q13882	PTK6	K219M	K	219	M	96	experimental	loss	UniProt	MUTAGEN K->M: Abolishes kinase activity and cell transformation, and phosphorylation of STAP2.	10980601,15471878,8940083
Q13882	PTK6	K219R	K	219	R	96	experimental	loss	UniProt	MUTAGEN K->R: Abolishes kinase activity.	27480927
Q13308	PTK7	T410S	T	410	S	-	germline	neutral	gnomAD	AF=1.20709e-02, allele-count=1986, n-homozygotes=28	32461654
Q13308	PTK7	E745D	E	745	D	-	germline	neutral	gnomAD	AF=1.14874e-02, allele-count=2856, n-homozygotes=19	32461654
Q13308	PTK7	A777V	A	777	V	-	germline	neutral	gnomAD	AF=4.67934e-02, allele-count=11762, n-homozygotes=343	32461654
Q13308	PTK7	R1038Q	R	1038	Q	816	germline	neutral	gnomAD	AF=1.27308e-02, allele-count=3189, n-homozygotes=69	32461654
Q7Z7A4	PXK	A525V	A	525	V	-	germline	neutral	gnomAD	AF=2.88827e-01, allele-count=72495, n-homozygotes=12164	32461654
Q7Z7A4	PXK	A535V	A	535	V	-	germline	neutral	gnomAD	AF=2.88827e-01, allele-count=72495, n-homozygotes=12164	32461654
Q7Z7A4	PXK	K481R	K	481	R	-	germline	neutral	gnomAD	AF=2.82188e-01, allele-count=70726, n-homozygotes=11903	32461654
P04049	RAF1	T491D	T	491	D	485	experimental	activating	UniProt	MUTAGEN T->D: Increased kinase activity but can still be inhibited by PPP5C; when associated with D-494.	16892053
P04049	RAF1	S494D	S	494	D	498	experimental	activating	UniProt	MUTAGEN S->D: Increased kinase activity but can still be inhibited by PPP5C; when associated with D-491.	16892053
P04049	RAF1	R563K	R	563	K	661	experimental	increase	UniProt	MUTAGEN R->K: Loss of methylation. Increased stability and catalytic activity in response to EGF treatment.	21917714
P04049	RAF1	K375W	K	375	W	96	experimental	loss	UniProt	MUTAGEN K->W: Catalytically inactive.	20956560
P04049	RAF1	L603P	L	603	P	847	germline	decrease	UniProt	VARIANT L -> P (in CMD1NN; shows impaired kinase activity and reduced MAPK3 activation with this mutation; dbSNP:rs587777586)	24777450
P04049	RAF1	A237T	A	237	T	-	germline	increase	UniProt	VARIANT A -> T (in CMD1NN; shows a mild increase in kinase activity; dbSNP:rs587777588)	24777450
P04049	RAF1	H626R	H	626	R	871	germline	increase	UniProt	VARIANT H -> R (in CMD1NN; shows a mild increase in kinase activity; dbSNP:rs1553609795)	24777450
P04049	RAF1	L613V	L	613	V	858	germline	increase	UniProt	VARIANT L -> V (in NS5 and LPRD2; shows in vitro greater kinase activity and enhanced MAPK1 activation than wild-type; dbSNP:rs80338797)	17603482,17603483
P04049	RAF1	P261A	P	261	A	-	germline	increase	UniProt	VARIANT P -> A (in NS5; shows in vitro greater kinase activity and enhanced MAPK1 activation than wild-type; dbSNP:rs121434594)	17603482
P04049	RAF1	P261L	P	261	L	-	germline	increase	UniProt	VARIANT P -> L (in NS5; shows greater kinase activity and enhanced MAPK1 activation than wild-type; dbSNP:rs397516828)	17603483
P04049	RAF1	P261S	P	261	S	-	germline	increase	UniProt	VARIANT P -> S (in NS5; shows in vitro greater kinase activity and enhanced MAPK1 activation than wild-type; dbSNP:rs121434594)	17603482,17603483,20683980
P04049	RAF1	P332A	P	332	A	12	germline	increase	UniProt	VARIANT P -> A (in CMD1NN; shows a mild increase in kinase activity; dbSNP:rs1057403865)	24777450
P04049	RAF1	S257L	S	257	L	-	germline	increase	UniProt	VARIANT S -> L (in NS5 and LPRD2; shows in vitro greater kinase activity and enhanced ERK activation than wild-type; dbSNP:rs80338796)	17603482,17603483
P04049	RAF1	T310A	T	310	A	-	germline	increase	UniProt	VARIANT T -> A (in CMD1NN; shows a mild increase in kinase activity; dbSNP:rs778155315)	24777450
P04049	RAF1	T641M	T	641	M	-	germline	increase	UniProt	VARIANT T -> M (in CMD1NN; shows a mild increase in kinase activity; dbSNP:rs587777587)	24777450
P04049	RAF1	V263A	V	263	A	-	germline	increase	UniProt	VARIANT V -> A (in NS5; shows in vitro greater kinase activity and enhanced MAPK1 activation than wild-type; dbSNP:rs397516830)	17603482
P04049	RAF1	D486N	D	486	N	479	germline	loss	UniProt	VARIANT D -> N (in NS5; has reduced or absent kinase activity; dbSNP:rs80338798)	17603483
P04049	RAF1	T491I	T	491	I	485	germline	loss	UniProt	VARIANT T -> I (in NS5; has reduced or absent kinase activity; dbSNP:rs80338799)	17603483
P04049	RAF1	S259A	S	259	A	-	somatic	increase	UniProt	VARIANT S -> A (in an ovarian serous carcinoma sample; somatic mutation; increased ERK activation; dbSNP:rs3730271)	16630891,17344846
P07949	RET	Y1062F	Y	1062	F	-	experimental	loss	UniProt	MUTAGEN Y->F: Abolishes GFRAL-mediated MAPK1/MAPK2 phosphorylation.	28953886
P07949	RET	K758R	K	758	R	96	experimental	loss	UniProt	MUTAGEN K->R: Loss of kinase activity. No effect on interaction with and dissociation from CBLC and CD2AP.	1,875,338,121,357,690
P07949	RET	G894S	G	894	S	481	germline	activating	UniProt	VARIANT G -> S (in a patient with renal agenesis; unknown pathological significance; constitutively phosphorylated; expressed only the immature intracellular form)	18252215
P07949	RET	V376A	V	376	A	-	germline	activating	UniProt	VARIANT V -> A (in a patient with renal agenesis; unknown pathological significance; constitutively phosphorylated; expressed only the immature intracellular form)	18252215
P07949	RET	V778I	V	778	I	152	germline	activating	UniProt	VARIANT V -> I (in a patient with renal agenesis; unknown pathological significance; constitutively phosphorylated; dbSNP:rs75686697)	18252215
P07949	RET	G691S	G	691	S	-	germline	neutral	gnomAD	AF=2.10206e-01, allele-count=52572, n-homozygotes=6336	32461654
P07949	RET	R982C	R	982	C	816	germline	neutral	gnomAD	AF=1.92396e-02, allele-count=4838, n-homozygotes=78	32461654
P07949	RET	D489N	D	489	N	-	germline	neutral	gnomAD	AF=2.27544e-03, allele-count=571, n-homozygotes=7	32461654
P07949	RET	Y606C	Y	606	C	-	tumor-predisposition	activating	PubMed	VARIANT constitutively-active	18248647
Q9BRS2	RIOK1	D324A	D	324	A	-	experimental	loss	UniProt	MUTAGEN D->A: Abolishes autophosphorylation activity; enhances association with pre-40S ribosomal subunits; inhibits processing of 18S-E pre-rRNA to the mature 18S rRNA.	22072790
Q9BVS4	RIOK2	K123A	K	123	A	-	experimental	loss	UniProt	MUTAGEN K->A: Abolishes autophosphorylation; impairs release of pre-40S trans-acting factors and rRNA processing; when associated with A-246.	19564402
Q9BVS4	RIOK2	D246A	D	246	A	-	experimental	loss	UniProt	MUTAGEN D->A: Abolishes autophosphorylation; impairs release of pre-40S trans-acting factors and rRNA processing; when associated with A-123.	19564402
Q9BVS4	RIOK2	G349R	G	349	R	-	germline	neutral	gnomAD	AF=0.40991, allele-count=148253, n-homozygotes=43955	32461654
Q9BVS4	RIOK2	N397S	N	397	S	-	germline	neutral	gnomAD	AF=7.59316e-02, allele-count=19057, n-homozygotes=862	32461654
Q9BVS4	RIOK2	H144R	H	144	R	-	germline	neutral	gnomAD	AF=3.36129e-03, allele-count=844, n-homozygotes=12	32461654
Q9BVS4	RIOK2	V175I	V	175	I	-	germline	neutral	gnomAD	AF=1.62269e-02, allele-count=4066, n-homozygotes=51	32461654
Q9BVS4	RIOK2	M244V	M	244	V	-	germline	neutral	gnomAD	AF=8.77307e-03, allele-count=2161, n-homozygotes=15	32461654
Q9BVS4	RIOK2	R507H	R	507	H	-	germline	neutral	gnomAD	AF=3.30580e-03, allele-count=822, n-homozygotes=13	32461654
O14730	RIOK3	K290A	K	290	A	-	experimental	loss	UniProt	MUTAGEN K->A: Decreases autophosphorylation (in vitro); abolishes inhibition of TNF-alpha-induced NF-kappaB activation; no effect on interaction with IRF3; fails to activate IFN-beta promoter and IRF3 phosphorylation.	19557502,24807708
O14730	RIOK3	S447L	S	447	L	-	germline	neutral	gnomAD	AF=3.49155e-03, allele-count=878, n-homozygotes=6	32461654
Q13546	RIPK1	S161A	S	161	A	485	experimental	decrease	UniProt	MUTAGEN S->A: Decreases RIPK1 kinase activity.	18408713
Q13546	RIPK1	S25D	S	25	D	39	experimental	loss	UniProt	MUTAGEN S->D: Phophomimetic mutant. Significant loss of kinase activity.	30988283
Q13546	RIPK1	K45A	K	45	A	96	experimental	loss	UniProt	MUTAGEN K->A: Abolishes kinase activity.	30988283,8612133
Q13546	RIPK1	D324H	D	324	H	-	germline	increase	UniProt	VARIANT D -> H (in AIEFL; prevents cleavage by CASP8; increased kinase activity; increased inflammatory response)	31827280,31827281
Q13546	RIPK1	D324V	D	324	V	-	germline	increase	UniProt	VARIANT D -> V (in AIEFL; prevents cleavage by CASP8; increased kinase activity; increased inflammatory response)	31827280
Q13546	RIPK1	A569V	A	569	V	-	germline	neutral	gnomAD	AF=1.67130e-02, allele-count=4185, n-homozygotes=56	32461654
O43353	RIPK2	Y381A	Y	381	A	-	experimental	decrease	UniProt	MUTAGEN Y->A: Prevents phosphorylation. Reduces serine and threonine phosphorylation of ARHGEF2.	21887730
O43353	RIPK2	K209R	K	209	R	584	experimental	decrease	UniProt	MUTAGEN K->R: Complete loss of polyubiquitination.	18079694
O43353	RIPK2	K503R	K	503	R	-	experimental	increase	UniProt	MUTAGEN K->R: Abolished ubiquitination by ZNRF4.	28656966
O43353	RIPK2	K47A	K	47	A	96	experimental	loss	UniProt	MUTAGEN K->A: Abolishes kinase activity.	9575181,9642260
O43353	RIPK2	D146N	D	146	N	426	experimental	loss	UniProt	MUTAGEN D->N: Abolishes kinase activity.	9705938
O43353	RIPK2	I259T	I	259	T	799	germline	neutral	gnomAD	AF=6.72465e-02, allele-count=16833, n-homozygotes=701	32461654
O43353	RIPK2	L268V	L	268	V	818	germline	neutral	gnomAD	AF=1.83476e-03, allele-count=456, n-homozygotes=6	32461654
Q9Y572	RIPK3	S227A	S	227	A	642	experimental	decrease	UniProt	MUTAGEN S->A: Abolishes ability to mediate necroptosis. Partial loss of kinase activity. No loss of PELI1-mediated degradation.	22265413,29883609
Q9Y572	RIPK3	K50D	K	50	D	96	experimental	loss	UniProt	MUTAGEN K->D: Abolishes kinase activity.	10339433,10358032,22265414
Q9Y572	RIPK3	D142N	D	142	N	426	experimental	loss	UniProt	MUTAGEN D->N: Abolishes kinase activity and ability to mediate necroptosis.	22265413
Q9Y572	RIPK3	K50A	K	50	A	96	experimental	loss	UniProt	MUTAGEN K->A: Abolishes kinase activity. Loss of PGAM5- and MLKL-binding. No effect on RIPK1-binding. Loss of interaction with PELI1 and PELI1-mediated ubiquitination. No loss of STUB1-mediated ubiquitination.	10339433,10358032,22265414,29883609
Q9Y572	RIPK3	T182A	T	182	A	536	experimental	loss	UniProt	MUTAGEN T->A: Abolishes kinase activity. Loss of interaction with PELI1 and PELI1-mediated ubiquitination. No loss of interaction with STUB1 and STUB1-mediated ubiquitination. No loss of interaction with RIPK1. Loss of ability to mediate TNF-induced necroptosis. Loss of autophosphorylation at Ser-227.	29883609
Q9Y572	RIPK3	P492Q	P	492	Q	-	germline	neutral	gnomAD	AF=7.32866e-02, allele-count=18324, n-homozygotes=988	32461654
P57078	RIPK4	I121N	I	121	N	377	germline	loss	UniProt	VARIANT I -> N (in BPS; loss of function; dbSNP:rs387906923)	22197489
P57078	RIPK4	T184I	T	184	I	536	germline	loss	UniProt	VARIANT T -> I (in BPS; loss of function)	22197489
P57078	RIPK4	A12G	A	12	G	17	germline	neutral	gnomAD	AF=1.34229e-01, allele-count=29364, n-homozygotes=2262	32461654
P57078	RIPK4	P749S	P	749	S	-	germline	neutral	gnomAD	AF=6.04685e-03, allele-count=1495, n-homozygotes=7	32461654
Q05823	RNASEL	K392R	K	392	R	96	experimental	loss	UniProt	MUTAGEN K->R: Complete loss of enzymatic activity and enzyme dimerization. No change in binding to 2-5A and RNA.	9862963
Q05823	RNASEL	D661A	D	661	A	-	experimental	loss	UniProt	MUTAGEN D->A: Complete loss of enzymatic activity.	11333017
Q05823	RNASEL	R667A	R	667	A	-	experimental	loss	UniProt	MUTAGEN R->A: Complete loss of enzymatic activity. No change in 2-5A binding and enzyme dimerization.	11333017
Q05823	RNASEL	H672A	H	672	A	-	experimental	loss	UniProt	MUTAGEN H->A: Complete loss of enzymatic activity. No change in 2-5A binding activity and enzyme dimerization.	11333017
Q05823	RNASEL	R462Q	R	462	Q	372	germline	decrease	UniProt	VARIANT R -> Q (risk factor for prostate cancer; reduced enzymatic activity; dbSNP:rs486907)	11799394,11941539,12415269,17344846
Q05823	RNASEL	R462Q	R	462	Q	372	germline	neutral	gnomAD	AF=3.05438e-01, allele-count=76756, n-homozygotes=12737	32461654
Q05823	RNASEL	D541E	D	541	E	879	germline	neutral	gnomAD	AF=0.46017, allele-count=134299, n-homozygotes=37156	32461654
Q05823	RNASEL	G59S	G	59	S	-	germline	neutral	gnomAD	AF=3.56565e-03, allele-count=895, n-homozygotes=2	32461654
Q05823	RNASEL	I97L	I	97	L	-	germline	neutral	gnomAD	AF=6.63345e-03, allele-count=1659, n-homozygotes=13	32461654
Q13464	ROCK1	T773S	T	773	S	-	germline	neutral	gnomAD	AF=9.31952e-03, allele-count=2297, n-homozygotes=15	32461654
Q13464	ROCK1	T1112P	T	1112	P	-	germline	neutral	gnomAD	AF=2.72524e-03, allele-count=681, n-homozygotes=2	32461654
O75116	ROCK2	D1131A	D	1131	A	-	experimental	decrease	UniProt	MUTAGEN D->A: Abolishes cleavage by granzyme B.	15699075
O75116	ROCK2	T431N	T	431	N	-	germline	neutral	gnomAD	AF=4.86038e-01, allele-count=104885, n-homozygotes=26339	32461654
Q01973	ROR1	T518M	T	518	M	144	germline	neutral	gnomAD	AF=3.09202e-01, allele-count=77682, n-homozygotes=12727	32461654
Q01974	ROR2	D482G	D	482	G	40	experimental	increase	UniProt	MUTAGEN D->G: Slight increase in kinase activity.	25029443
Q01974	ROR2	T245A	T	245	A	-	germline	neutral	gnomAD	AF=0.379993, allele-count=152549, n-homozygotes=48081	32461654
Q01974	ROR2	V819I	V	819	I	-	germline	neutral	gnomAD	AF=0.283625, allele-count=177373, n-homozygotes=64746	32461654
Q01974	ROR2	H349D	H	349	D	-	germline	neutral	gnomAD	AF=5.03126e-03, allele-count=1265, n-homozygotes=34	32461654
Q01974	ROR2	R530Q	R	530	Q	156	germline	neutral	gnomAD	AF=1.95943e-03, allele-count=489, n-homozygotes=2	32461654
Q01974	ROR2	G695R	G	695	R	633	germline	neutral	gnomAD	AF=4.70098e-03, allele-count=1181, n-homozygotes=36	32461654
Q01974	ROR2	D935E	D	935	E	-	germline	neutral	gnomAD	AF=4.86301e-03, allele-count=1219, n-homozygotes=8	32461654
P08922	ROS1	Y2274F	Y	2274	F	-	experimental	decrease	UniProt	MUTAGEN Y->F: Loss of phosphorylation at Y-2274 and loss of interaction with PTPN11.	12538861
P08922	ROS1	Y2334F	Y	2334	F	-	experimental	decrease	UniProt	MUTAGEN Y->F: Loss of phosphorylation at Y-2334 and loss of interaction with PTPN11.	12538861
P08922	ROS1	K1980M	K	1980	M	96	experimental	loss	UniProt	MUTAGEN K->M: Loss of kinase activity.	12661006
P08922	ROS1	T145P	T	145	P	-	germline	neutral	gnomAD	AF=1.61221e-01, allele-count=40472, n-homozygotes=3505	32461654
P08922	ROS1	R167Q	R	167	Q	-	germline	neutral	gnomAD	AF=7.09477e-02, allele-count=17662, n-homozygotes=704	32461654
P08922	ROS1	S1109L	S	1109	L	-	germline	neutral	gnomAD	AF=7.50084e-02, allele-count=18831, n-homozygotes=863	32461654
P08922	ROS1	D1776H	D	1776	H	-	germline	neutral	gnomAD	AF=8.69805e-03, allele-count=2179, n-homozygotes=49	32461654
P08922	ROS1	E1902K	E	1902	K	-	germline	neutral	gnomAD	AF=8.00861e-03, allele-count=2010, n-homozygotes=25	32461654
P08922	ROS1	D2213N	D	2213	N	848	germline	neutral	gnomAD	AF=2.02917e-01, allele-count=49500, n-homozygotes=5539	32461654
P08922	ROS1	S2229C	S	2229	C	864	germline	neutral	gnomAD	AF=1.99169e-01, allele-count=47656, n-homozygotes=5179	32461654
P08922	ROS1	N2240K	N	2240	K	875	germline	neutral	gnomAD	AF=1.42037e-02, allele-count=3076, n-homozygotes=70	32461654
P08922	ROS1	P224S	P	224	S	-	germline	neutral	gnomAD	AF=3.77163e-03, allele-count=948, n-homozygotes=7	32461654
P08922	ROS1	I537M	I	537	M	-	germline	neutral	gnomAD	AF=4.97386e-02, allele-count=12501, n-homozygotes=597	32461654
P08922	ROS1	S653F	S	653	F	-	germline	neutral	gnomAD	AF=4.28421e-03, allele-count=1077, n-homozygotes=5	32461654
P08922	ROS1	R1506G	R	1506	G	-	germline	neutral	gnomAD	AF=4.32319e-03, allele-count=1085, n-homozygotes=25	32461654
P08922	ROS1	K2228Q	K	2228	Q	863	germline	neutral	gnomAD	AF=2.00559e-01, allele-count=48538, n-homozygotes=5329	32461654
P08922	ROS1	N790S	N	790	S	-	germline	neutral	gnomAD	AF=2.34673e-03, allele-count=590, n-homozygotes=12	32461654
P08922	ROS1	K2328R	K	2328	R	-	germline	neutral	gnomAD	AF=1.06286e-03, allele-count=267, n-homozygotes=2	32461654
Q15418	RPS6KA1	K335T	K	335	T	-	germline	neutral	gnomAD	AF=2.19484e-01, allele-count=55162, n-homozygotes=6654	32461654
P51812	RPS6KA3	R383W	R	383	W	-	germline	decrease	UniProt	VARIANT R -> W (in XLID19; kinase activity is decreased but not abolished; dbSNP:rs122454129)	10319851
P51812	RPS6KA3	I38S	I	38	S	1	germline	neutral	gnomAD	AF=1.60890e-02, allele-count=2948, n-homozygotes=22	32461654
O75676	RPS6KA4	F709A	F	709	A	-	experimental	increase	UniProt	MUTAGEN F->A: Strongly elevates basal activity.	11035004
O75676	RPS6KA4	S758A	S	758	A	-	germline	neutral	gnomAD	AF=3.39019e-01, allele-count=71297, n-homozygotes=12797	32461654
O75582	RPS6KA5	S360A	S	360	A	-	experimental	decrease	UniProt	MUTAGEN S->A: Decreases kinase activity by 60% in response to PMA and UV-C.	15568999
O75582	RPS6KA5	T700A	T	700	A	866	experimental	decrease	UniProt	MUTAGEN T->A,D: Strongly reduces phosphorylation of T-581 in response to PMA and UV-C.	17117922
O75582	RPS6KA5	T700D	T	700	D	866	experimental	decrease	UniProt	MUTAGEN T->A,D: Strongly reduces phosphorylation of T-581 in response to PMA and UV-C.	17117922
O75582	RPS6KA5	D195A	D	195	A	479	experimental	loss	UniProt	MUTAGEN D->A: Loss of kinase activity.	9687510
O75582	RPS6KA5	S376A	S	376	A	-	experimental	loss	UniProt	MUTAGEN S->A: Loss of kinase activity, and decreases the phosphorylation of S-360 and T-581.	15568999
O75582	RPS6KA5	D565A	D	565	A	479	experimental	loss	UniProt	MUTAGEN D->A: Loss of kinase activity.	9687510
O75582	RPS6KA5	T581A	T	581	A	529	experimental	loss	UniProt	MUTAGEN T->A: Loss of kinase activity, and blocks phosphorylation of S-212; S-376 and S-381 in response to
O75582	RPS6KA5	S212A	S	212	A	529	experimental	loss	UniProt	MUTAGEN S->A: Inactivates the N-terminal kinase domain.	15568999
Q9UK32	RPS6KA6	S389A	S	389	A	-	experimental	decrease	UniProt	MUTAGEN S->A: Strongly decreases activity.	15632195
Q9UK32	RPS6KA6	D692N	D	692	N	861	germline	neutral	gnomAD	AF=7.93095e-02, allele-count=14518, n-homozygotes=597	32461654
P23443	RPS6KB1	K167N	K	167	N	219	experimental	decrease	UniProt	MUTAGEN K->N: Greatly reduces activity. Greatly reduces phosphorylation at T-412 and moderately reduces phosphorylation at T-252.	17446865
P23443	RPS6KB1	T412E	T	412	E	-	experimental	increase	UniProt	MUTAGEN T->E: Mimics phosphorylation. Facilitates phosphorylation of T-252 by PDPK1; when associated with E-434; E-441; E-444 and E-447. Mimics phosphorylation. No effect on interaction with PDPK1 and phosphorylation of T-252. Impairs association with the eIF3 complex.	16286006,19570988,9445476
P23443	RPS6KB1	S394A	S	394	A	-	experimental	loss	UniProt	MUTAGEN S->A: Loss of activity. Loss of phosphorylation at T-412.	17446865
Q9UBS0	RPS6KB2	A420V	A	420	V	-	germline	neutral	gnomAD	AF=4.17065e-01, allele-count=95724, n-homozygotes=21696	32461654
Q96S38	RPS6KC1	P319L	P	319	L	-	germline	neutral	gnomAD	AF=1.11282e-02, allele-count=2796, n-homozygotes=36	32461654
Q96S38	RPS6KC1	P424L	P	424	L	-	germline	neutral	gnomAD	AF=3.15750e-03, allele-count=790, n-homozygotes=2	32461654
Q96S38	RPS6KC1	A546P	A	546	P	-	germline	neutral	gnomAD	AF=2.90574e-03, allele-count=725, n-homozygotes=14	32461654
Q96S38	RPS6KC1	N575S	N	575	S	-	germline	neutral	gnomAD	AF=2.23482e-02, allele-count=5596, n-homozygotes=218	32461654
Q96S38	RPS6KC1	L853F	L	853	F	-	germline	neutral	gnomAD	AF=8.24835e-03, allele-count=2069, n-homozygotes=94	32461654
Q9Y6S9	RPS6KL1	R21Q	R	21	Q	-	germline	neutral	gnomAD	AF=3.76009e-01, allele-count=94497, n-homozygotes=18923	32461654
Q9Y6S9	RPS6KL1	P121L	P	121	L	-	germline	neutral	gnomAD	AF=3.56883e-01, allele-count=88948, n-homozygotes=17524	32461654
P34925	RYK	N484F	N	484	F	480	experimental	increase	UniProt	MUTAGEN N->F: Gain of an autophosphorylation activity. Gain of an autophosphorylation activity; when associated with A-359. Gain of an autophosphorylation activity; when associated with G-334 and G-482.	10454588
P34925	RYK	A485G	A	485	G	481	experimental	increase	UniProt	MUTAGEN A->G: Gain of an autophosphorylation activity. Gain of an autophosphorylation activity; when associated with G-334 and F-481.	10454588
P34925	RYK	S99N	S	99	N	-	germline	neutral	gnomAD	AF=1.62967e-01, allele-count=40560, n-homozygotes=4400	32461654
Q52WX2	SBK1	K61R	K	61	R	39	experimental	loss	UniProt	Loss of activity.	16403448
Q96KG9	SCYL1	Q663H	Q	663	H	-	germline	neutral	gnomAD	AF=3.19156e-03, allele-count=585, n-homozygotes=3	32461654
Q6P3W7	SCYL2	P357L	P	357	L	882	germline	neutral	gnomAD	AF=8.26534e-02, allele-count=19489, n-homozygotes=1077	32461654
Q8IZE3	SCYL3	G597A	G	597	A	-	germline	neutral	gnomAD	AF=7.31917e-02, allele-count=18384, n-homozygotes=817	32461654
Q8IZE3	SCYL3	Q621R	Q	621	R	-	germline	neutral	gnomAD	AF=0.356858, allele-count=161417, n-homozygotes=52632	32461654
O00141	SGK1	S429D	S	429	D	-	experimental	activating	PubMed	VARIANT constitutively-active	15845389,16036218
O00141	SGK1	T256A	T	256	A	529	experimental	decrease	UniProt	MUTAGEN T->A: Low activity.	10191262
O00141	SGK1	T256D	T	256	D	529	experimental	decrease	UniProt	MUTAGEN T->D: Low activity.	10191262
O00141	SGK1	T256E	T	256	E	529	experimental	decrease	UniProt	MUTAGEN T->E: Low activity.	10191262
O00141	SGK1	Y298A	Y	298	A	631	experimental	decrease	UniProt	MUTAGEN Y->A: Abolishes interaction with NEDD4 and NEDD4L.	11696533
O00141	SGK1	S422A	S	422	A	-	experimental	decrease	UniProt	MUTAGEN S->A: Low activity.	10191262,11696533,12911626,15040001
O00141	SGK1	S422D	S	422	D	-	experimental	increase	UniProt	MUTAGEN S->D: 10-fold activation.	10191262,11696533,12911626,15040001
O00141	SGK1	K127M	K	127	M	96	experimental	loss	UniProt	MUTAGEN K->M: Abolishes enzymatic activity.	11696533,12911626,15040001
Q9HBY8	SGK2	S356D	S	356	D	-	experimental	increase	UniProt	MUTAGEN S->D: Increased activation.	10548550
Q96BR1	SGK3	S486D	S	486	D	-	experimental	increase	UniProt	MUTAGEN S->D: Increased activation.	10548550
Q96BR1	SGK3	K191M	K	191	M	96	experimental	loss	UniProt	MUTAGEN K->M: Abolishes activity.	16790420
P57059	SIK1	S135A	S	135	A	383	experimental	decrease	UniProt	MUTAGEN S->A: Decreased kinase activity without affecting much autophosphorylation status.	18348280
P57059	SIK1	T182A	T	182	A	529	experimental	decrease	UniProt	MUTAGEN T->A: Prevents phosphorylation and activation by STK11/LKB1 complex. Reduced inhibition of CRTC3-mediated transcriptional activity.	14976552,29211348
P57059	SIK1	S209A	S	209	A	590	experimental	decrease	UniProt	MUTAGEN S->A: Decreased kinase activity without affecting much autophosphorylation status.	18348280
P57059	SIK1	S248A	S	248	A	802	experimental	decrease	UniProt	MUTAGEN S->A: Decreased kinase activity without affecting much autophosphorylation status.	18348280
P57059	SIK1	S575E	S	575	E	-	experimental	decrease	UniProt	MUTAGEN S->E: Strongly reduced but still present interaction with 14-3-3 proteins in response to cAMP signaling and, thus, still able to inhibit TORC activity.	29211348
P57059	SIK1	S186T	S	186	T	536	experimental	decrease	UniProt	MUTAGEN S->T: Does not autophosphorylation and kinase activity.	18348280
P57059	SIK1	T473E	T	473	E	-	experimental	decrease	UniProt	MUTAGEN T->E: Reduced but still present interaction with 14-3-3 proteins in response to cAMP signaling and, thus, still able to inhibit TORC activity.	29211348
P57059	SIK1	S575A	S	575	A	-	experimental	decrease	UniProt	MUTAGEN S->A: Loss of interaction with 14-3-3 proteins in response to cAMP signaling and, thus, still able to inhibit
P57059	SIK1	K56M	K	56	M	96	experimental	loss	UniProt	MUTAGEN K->M: Loss of kinase activity.	18348280,19622832
P57059	SIK1	S186A	S	186	A	536	experimental	loss	UniProt	MUTAGEN S->A,D,C,G: Impaired autophosphorylation and kinase activity.	18348280
P57059	SIK1	A615V	A	615	V	-	germline	neutral	gnomAD	AF=0.112298, allele-count=192033, n-homozygotes=85333	32461654
P57059	SIK1	G15S	G	15	S	19	germline	neutral	gnomAD	AF=2.30736e-01, allele-count=51876, n-homozygotes=6444	32461654
P57059	SIK1	P696L	P	696	L	-	germline	neutral	gnomAD	AF=7.33895e-03, allele-count=455, n-homozygotes=4	32461654
P57059	SIK1	A725V	A	725	V	-	germline	neutral	gnomAD	AF=3.06070e-03, allele-count=429, n-homozygotes=6	32461654
Q9H0K1	SIK2	T175E	T	175	E	529	experimental	activating	UniProt	MUTAGEN T->E: Constitutively active.	14976552
Q9H0K1	SIK2	T175A	T	175	A	529	experimental	loss	UniProt	MUTAGEN T->A: Prevents phosphorylation and activation by STK11/LKB1 complex.	14976552
Q9Y2K2	SIK3	T469A	T	469	A	-	experimental	loss	UniProt	MUTAGEN T->A: Loss of interaction with 14-3-3 proteins in response to cAMP signaling; inhibits cAMP signaling.	29211348
Q9Y2K2	SIK3	T469E	T	469	E	-	experimental	loss	UniProt	MUTAGEN T->E: Loss of interaction with 14-3-3 proteins in response to cAMP signaling; inhibits cAMP signaling.	29211348
Q9Y2K2	SIK3	S551A	S	551	A	-	experimental	loss	UniProt	MUTAGEN S->A: Loss of interaction with 14-3-3 proteins in response to cAMP signaling; inhibits cAMP signaling.	29211348
Q9Y2K2	SIK3	S551E	S	551	E	-	experimental	loss	UniProt	MUTAGEN S->E: Loss of interaction with 14-3-3 proteins in response to cAMP signaling; inhibits cAMP signaling.	29211348
Q9Y2K2	SIK3	T221A	T	221	A	529	experimental	loss	UniProt	MUTAGEN T->A: Prevents phosphorylation and activation by STK11/LKB1 complex.	14976552
Q9Y2K2	SIK3	R187C	R	187	C	424	germline	decrease	UniProt	VARIANT R -> C (in SEMDK; decreased protein expression; decreased kinase activity; no effect on the interaction with DEPTOR, MLST8/GbetaL, RICTOR and RPTOR; dbSNP:rs1565460853)	30232230
Q9Y2K2	SIK3	D1098E	D	1098	E	-	germline	neutral	gnomAD	AF=1.37029e-03, allele-count=344, n-homozygotes=3	32461654
Q9H2G2	SLK	K63R	K	63	R	96	experimental	loss	UniProt	MUTAGEN K->R: Loss of activity.	10699464
Q9H2G2	SLK	C552Y	C	552	Y	-	germline	neutral	gnomAD	AF=1.83403e-01, allele-count=46081, n-homozygotes=4591	32461654
Q9H2G2	SLK	A658G	A	658	G	-	germline	neutral	gnomAD	AF=1.01104e-02, allele-count=2542, n-homozygotes=25	32461654
Q9H2G2	SLK	I679T	I	679	T	-	germline	neutral	gnomAD	AF=1.37352e-02, allele-count=3435, n-homozygotes=52	32461654
Q9H2G2	SLK	T697I	T	697	I	-	germline	neutral	gnomAD	AF=2.15504e-01, allele-count=54060, n-homozygotes=6092	32461654
Q9H2G2	SLK	G666E	G	666	E	-	germline	neutral	gnomAD	AF=3.51244e-03, allele-count=883, n-homozygotes=19	32461654
Q96Q15	SMG1	D2335A	D	2335	A	-	experimental	loss	UniProt	MUTAGEN D->A: Loss of function.	11331269,11544179,15175154
Q96Q15	SMG1	A35T	A	35	T	-	germline	neutral	gnomAD	AF=3.73742e-02, allele-count=5949, n-homozygotes=269	32461654
Q96Q15	SMG1	R1418T	R	1418	T	-	germline	neutral	gnomAD	AF=1.71934e-02, allele-count=4277, n-homozygotes=105	32461654
Q96Q15	SMG1	G2889S	G	2889	S	-	germline	neutral	gnomAD	AF=1.42849e-03, allele-count=356, n-homozygotes=3	32461654
Q9NRH2	SNRK	T173A	T	173	A	529	experimental	loss	UniProt	MUTAGEN T->A,E: Prevents phosphorylation and activation by STK11/LKB1 complex.	15733851
Q9NRH2	SNRK	T173E	T	173	E	529	experimental	loss	UniProt	MUTAGEN T->A,E: Prevents phosphorylation and activation by STK11/LKB1 complex.	15733851
Q9NRH2	SNRK	P391S	P	391	S	-	germline	neutral	gnomAD	AF=9.61222e-03, allele-count=2397, n-homozygotes=19	32461654
[truncated: 508 more rows]

## Sheet: B Test variant set
Table S1A: Known functional variants in human kinases (training set)
A dash ("-") in PfamPos denotes variants not inside the region included the catalytic domain we are considering
UniProtAcc	GeneSymbol	Variant	WildType	Position	Mutation	PfamPos	GeneticType	FunctionalType	Source	Information	PubMed
Q6ZMQ8	AATK	G70A	G	70	A	-	germline	neutral	gnomAD	AF=0.00112120, allele-count=1602, n-homozygotes=4	32461654
P00519	ABL1	E255V	E	255	V	44	not assigned	ambiguous/unknown	PubMed	-	37427999,38035030
P00519	ABL1	D363G	D	363	G	426	not assigned	ambiguous/unknown	PubMed	-	37123466
P00519	ABL1	E334V	E	334	V	358	not assigned	ambiguous/unknown	PubMed	-	37763211
P00519	ABL1	E450K	E	450	K	651	not assigned	ambiguous/unknown	PubMed	-	37302352
P00519	ABL1	H396R	H	396	R	526	not assigned	ambiguous/unknown	PubMed	-	36324283
P00519	ABL1	M351T	M	351	T	385	not assigned	ambiguous/unknown	PubMed	-	38363412
P00519	ABL1	T392I	T	392	I	507	not assigned	ambiguous/unknown	PubMed	-	37763211
P00519	ABL1	G706S	G	706	S	-	germline	neutral	gnomAD	AF=0.00237176, allele-count=3462, n-homozygotes=14	32461654
P42684	ABL2	R78H	R	78	H	-	not assigned	ambiguous/unknown	PubMed	-	32461654
P42684	ABL2	P914R	P	914	R	-	germline	neutral	gnomAD	AF=0.00158014, allele-count=2310, n-homozygotes=20	32461654
P42684	ABL2	P608S	P	608	S	-	germline	neutral	gnomAD	AF=0.00155147, allele-count=2268, n-homozygotes=9	32461654
Q04771	ACVR1	G328R	G	328	R	401	germline	activating/increase	PubMed	-	37329499,38159793
P36896	ACVR1B	R484H	R	484	H	832	not assigned	ambiguous/unknown	PubMed	-	37486509
Q8NER5	ACVR1C	I195T	I	195	T	30	germline	loss/decrease	PubMed	-	38307384
Q8NER5	ACVR1C	N150H	N	150	H	-	germline	ambiguous/unkonwn	PubMed	-	38307384
Q8NER5	ACVR1C	I195T	I	195	T	30	germline	neutral	gnomAD	AF=0.00166635, allele-count=2436, n-homozygotes=2	32461654
Q8NER5	ACVR1C	N150H	N	150	H	-	germline	neutral	gnomAD	AF=0.00927497, allele-count=13558, n-homozygotes=78	32461654
P27037	ACVR2A	R484H	R	484	H	864	not assigned	ambiguous/unknown	PubMed	-	37486509
P27037	ACVR2A	S127L	S	127	L	-	not assigned	ambiguous/unknown	PubMed	-	37486509
P37023	ACVRL1	I256N	I	256	N	178	germline	loss/decrease	PubMed	-	38225712
P37023	ACVRL1	L285P	L	285	P	249	germline	loss/decrease	PubMed	-	38225712
P37023	ACVRL1	P424L	P	424	L	619	germline	loss/decrease	PubMed	-	38225712
P37023	ACVRL1	R67Q	R	67	Q	-	germline	loss/decrease	PubMed	-	38225712
P37023	ACVRL1	R374W	R	374	W	539	not assigned	ambiguous/unknown	PubMed	-	38202257
P37023	ACVRL1	R411Q	R	411	Q	602	not assigned	ambiguous/unknown	PubMed	-	38202257
P37023	ACVRL1	A482V	A	482	V	842	germline	neutral	gnomAD	AF=0.00327335, allele-count=4784, n-homozygotes=16	32461654
P31749	AKT1	C224S	C	224	S	228	experimental	nitrosylation site	PubMed	-	38191266
P31749	AKT1	C77S	C	77	S	-	experimental	nitrosylation site	PubMed	-	38191266
P31749	AKT1	G159V	G	159	V	40	experimental	loss/decrease	PubMed	-	37511907
P31749	AKT1	G336D	G	336	D	592	experimental	loss/decrease	PubMed	-	37511907
P31749	AKT1	H265Y	H	265	Y	393	experimental	loss/decrease	PubMed	-	37511907
P31749	AKT1	R273Q	R	273	Q	424	experimental	loss/decrease	PubMed	-	37511907
P31749	AKT1	D323H	D	323	H	576	not assigned	ambiguous/unknown	PubMed	-	38321573
P31749	AKT1	G157R	G	157	R	38	not assigned	ambiguous/unknown	PubMed	-	37511907
P31749	AKT1	L52R	L	52	R	-	not assigned	ambiguous/unknown	PubMed	-	37744220
P31749	AKT1	Q79K	Q	79	K	-	not assigned	ambiguous/unknown	PubMed	-	37658401
P31751	AKT2	P50T	P	50	T	-	germline	loss/decrease	PubMed	-	36409629
P31751	AKT2	A179T	A	179	T	93	not assigned	ambiguous/unknown	PubMed	-	37754255
P31751	AKT2	L183Q	L	183	Q	98	not assigned	ambiguous/unknown	PubMed	-	37754255
P31751	AKT2	R208K	R	208	K	162	not assigned	ambiguous/unknown	PubMed	-	38383734
Q9UM73	ALK	F1174C	F	1174	C	159	somatic	resistance	PubMed	-	37265111,38264745,38274094
Q9UM73	ALK	I1171T	I	1171	T	154	somatic	resistance	PubMed	-	37456921,37577301,37964559
Q9UM73	ALK	V1180L	V	1180	L	179	somatic	resistance	PubMed	-	37577301,37907052,38229767
Q9UM73	ALK	D1203N	D	1203	N	241	somatic	resistance	PubMed	-	37265111,38149055
Q9UM73	ALK	D1225N	D	1225	N	370	somatic	activating/increase	PubMed	inferred by treatment	37529699
Q9UM73	ALK	I1171S	I	1171	S	154	somatic	activating/increase	PubMed	-	38027370
Q9UM73	ALK	L1256F	L	1256	F	433	somatic	resistance	PubMed	-	38433979
Q9UM73	ALK	L861Q	L	861	Q	-	not assigned	ambiguous/unknown	PubMed	-	36610238,38046784,38096714
Q9UM73	ALK	G1269A	G	1269	A	478	not assigned	ambiguous/unknown	PubMed	-	37577301,38360931
Q9UM73	ALK	E717K	E	717	K	-	not assigned	ambiguous/unknown	PubMed	-	38215117
Q9UM73	ALK	G1125S	G	1125	S	40	not assigned	ambiguous/unknown	PubMed	-	37964559
Q9UM73	ALK	L1152R	L	1152	R	98	not assigned	ambiguous/unknown	PubMed	-	37577301
Q9UM73	ALK	L1198F	L	1198	F	235	not assigned	ambiguous/unknown	PubMed	-	38128254
Q9UM73	ALK	L1226F	L	1226	F	371	not assigned	ambiguous/unknown	PubMed	-	37964559
Q9UM73	ALK	S1189C	S	1189	C	217	not assigned	ambiguous/unknown	PubMed	-	36506539
Q9UM73	ALK	S1189F	S	1189	F	217	not assigned	ambiguous/unknown	PubMed	-	37964559
Q9UM73	ALK	S1206Y	S	1206	Y	251	not assigned	ambiguous/unknown	PubMed	-	37577301
Q9UM73	ALK	V1135A	V	1135	A	58	not assigned	ambiguous/unknown	PubMed	-	37964559
Q9UM73	ALK	V757M	V	757	M	-	not assigned	ambiguous/unknown	PubMed	-	37900840
Q9UM73	ALK	F1174S	F	1174	S	159	not assigned	ambiguous/unknown	PubMed	-	38264745
Q9UM73	ALK	T680I	T	680	I	-	germline	neutral	gnomAD	AF=0.0239377, allele-count=34991, n-homozygotes=523	32461654
Q8NFD2	ANKK1	D4Y	D	4	Y	7	germline	neutral	gnomAD	AF=0.00226067, allele-count=3156, n-homozygotes=7	32461654
Q8NFD2	ANKK1	C52W	C	52	W	97	germline	neutral	gnomAD	AF=0.00201441, allele-count=2777, n-homozygotes=95	32461654
Q8NFD2	ANKK1	R122H	R	122	H	376	germline	neutral	gnomAD	AF=0.0105150, allele-count=15368, n-homozygotes=107	32461654
Q8NFD2	ANKK1	R185Q	R	185	Q	530	germline	neutral	gnomAD	AF=0.00289166, allele-count=4225, n-homozygotes=189	32461654
Q8NFD2	ANKK1	W253R	W	253	R	762	germline	neutral	gnomAD	AF=0.00228022, allele-count=3333, n-homozygotes=6	32461654
Q8NFD2	ANKK1	D280E	D	280	E	845	germline	neutral	gnomAD	AF=0.00471034, allele-count=6850, n-homozygotes=19	32461654
Q8NFD2	ANKK1	R295L	R	295	L	863	germline	neutral	gnomAD	AF=0.00176610, allele-count=2578, n-homozygotes=11	32461654
Q8NFD2	ANKK1	G318R	G	318	R	-	germline	neutral	gnomAD	AF=0.465249, allele-count=678606, n-homozygotes=166960	32461654
Q8NFD2	ANKK1	G442C	G	442	C	-	germline	neutral	gnomAD	AF=0.00127922, allele-count=1853, n-homozygotes=15	32461654
Q8NFD2	ANKK1	R445C	R	445	C	-	germline	neutral	gnomAD	AF=0.00194343, allele-count=2816, n-homozygotes=84	32461654
Q8NFD2	ANKK1	G451R	G	451	R	-	germline	neutral	gnomAD	AF=0.0243504, allele-count=35245, n-homozygotes=582	32461654
Q8NFD2	ANKK1	R478Q	R	478	Q	-	germline	neutral	gnomAD	AF=0.00156440, allele-count=2266, n-homozygotes=52	32461654
Q8NFD2	ANKK1	T496N	T	496	N	-	germline	neutral	gnomAD	AF=0.00156374, allele-count=2254, n-homozygotes=52	32461654
Q8NFD2	ANKK1	P596L	P	596	L	-	germline	neutral	gnomAD	AF=0.00121000, allele-count=1756, n-homozygotes=11	32461654
Q8NFD2	ANKK1	A696T	A	696	T	-	germline	neutral	gnomAD	AF=0.00170552, allele-count=2492, n-homozygotes=4	32461654
Q96GD4	AURKB	P325S	P	325	S	850	germline	neutral	gnomAD	AF=0.00119196, allele-count=1736, n-homozygotes=4	32461654
Q96GD4	AURKB	G212R	G	212	R	464	germline	neutral	gnomAD	AF=0.00129285, allele-count=1890, n-homozygotes=3	32461654
Q96GD4	AURKB	V103M	V	103	M	92	germline	neutral	gnomAD	AF=0.00181549, allele-count=2654, n-homozygotes=19	32461654
Q9UQB9	AURKC	D166V	D	166	V	426	not assigned	ambiguous/unknown	PubMed	-	36326488
Q9UQB9	AURKC	D221Y	D	221	Y	587	not assigned	ambiguous/unknown	PubMed	-	36326488
Q9UQB9	AURKC	E91K	E	91	K	149	not assigned	ambiguous/unknown	PubMed	-	36326488
Q9UQB9	AURKC	G235V	G	235	V	604	not assigned	ambiguous/unknown	PubMed	-	36326488
P30530	AXL	W451C	W	451	C	-	somatic	activating/increase	PubMed	-	38369783
P30530	AXL	W450C	W	450	C	-	not assigned	ambiguous/unknown	PubMed	-	38369783
P30530	AXL	Q361P	Q	361	P	-	germline	neutral	gnomAD	AF=0.00224205, allele-count=3277, n-homozygotes=4	32461654
P30530	AXL	G517S	G	517	S	11	germline	neutral	gnomAD	AF=0.00649300, allele-count=9492, n-homozygotes=42	32461654
P51451	BLK	P39L	P	39	L	-	germline	neutral	gnomAD	AF=0.00280865, allele-count=4103, n-homozygotes=8	32461654
P51451	BLK	R238Q	R	238	Q	28	germline	neutral	gnomAD	AF=0.00472611, allele-count=6909, n-homozygotes=23	32461654
P51451	BLK	K325T	K	325	T	254	germline	neutral	gnomAD	AF=0.00184366, allele-count=2695, n-homozygotes=11	32461654
P51451	BLK	R359C	R	359	C	424	germline	neutral	gnomAD	AF=0.00102412, allele-count=1497, n-homozygotes=3	32461654
P51451	BLK	R450H	R	450	H	661	germline	neutral	gnomAD	AF=0.00107372, allele-count=1563, n-homozygotes=25	32461654
Q9NSY1	BMP2K	A58D	A	58	D	38	germline	neutral	gnomAD	AF=0.0326282, allele-count=36431, n-homozygotes=622	32461654
P36894	BMPR1A	M470T	M	470	T	634	not assigned	ambiguous/unknown	PubMed	-	37900118
O00238	BMPR1B	E244K	E	244	K	149	somatic	loss/decrease	PubMed	-	37486509
O00238	BMPR1B	Q249R	Q	249	R	155	not assigned	ambiguous/unknown	PubMed	-	38401385
O00238	BMPR1B	R149W	R	149	W	-	germline	neutral	gnomAD	AF=0.00110688, allele-count=1608, n-homozygotes=17	32461654
Q13873	BMPR2	Q721R	Q	721	R	-	germline	loss/decrease	PubMed	-	36917778
Q13873	BMPR2	E274K	E	274	K	219	not assigned	ambiguous/unknown	PubMed	-	37486509
Q13873	BMPR2	K477E	K	477	E	814	not assigned	ambiguous/unknown	PubMed	-	36675162
Q13873	BMPR2	L685F	L	685	F	-	not assigned	ambiguous/unknown	PubMed	-	37486509
Q13873	BMPR2	N565S	N	565	S	-	not assigned	ambiguous/unknown	PubMed	-	36907526
Q13873	BMPR2	R272C	R	272	C	217	not assigned	ambiguous/unknown	PubMed	-	36675162
Q13873	BMPR2	R272L	R	272	L	217	not assigned	ambiguous/unknown	PubMed	-	37486509
Q13873	BMPR2	S967P	S	967	P	-	not assigned	ambiguous/unknown	PubMed	-	36907526
Q13873	BMPR2	T659I	T	659	I	-	not assigned	ambiguous/unknown	PubMed	-	37628941
Q13873	BMPR2	V348I	V	348	I	476	not assigned	ambiguous/unknown	PubMed	-	36675162
P51813	BMX	A214V	A	214	V	-	germline	neutral	gnomAD	AF=0.00153078, allele-count=1681, n-homozygotes=15	32461654
P51813	BMX	S284L	S	284	L	-	germline	neutral	gnomAD	AF=0.00280791, allele-count=3074, n-homozygotes=6	32461654
P51813	BMX	E422A	E	422	A	36	germline	neutral	gnomAD	AF=0.00231209, allele-count=2538, n-homozygotes=2	32461654
P15056	BRAF	K601E	K	601	E	492	somatic	resistance	PubMed	-	36409971,36835466,36867406,37065428,37477913,37543207,37761374,38002585,38096472,38417222,38440233
P15056	BRAF	V600R	V	600	R	491	somatic	activating/increase	PubMed	inferred from drug response	36273892,36356284,37065428,37533985,38333370
P15056	BRAF	D594G	D	594	G	479	somatic	loss/decrease	PubMed	-	36674722,36867406,37163002,38150000
P15056	BRAF	L525R	L	525	R	227	somatic	activating/increase	PubMed	-	36856908
P15056	BRAF	L597R	L	597	R	482	somatic	activating/increase	PubMed	-	38417222
P15056	BRAF	S732A	S	732	A	870	experimental	phosphosite	PubMed	-	37625591
P15056	BRAF	V600G	V	600	G	491	somatic	activating/increase	PubMed	-	36356284
P15056	BRAF	N581S	N	581	S	431	not assigned	ambiguous/unknown	PubMed	-	36315473,36867406,38406519
P15056	BRAF	D594N	D	594	N	479	somatic	ambiguous/unkonwn	PubMed	-	36647494,37122752
P15056	BRAF	F595L	F	595	L	480	not assigned	ambiguous/unknown	PubMed	-	37530550,37722300
P15056	BRAF	N581I	N	581	I	431	not assigned	ambiguous/unknown	PubMed	-	37519790,38096472
P15056	BRAF	D22N	D	22	N	-	not assigned	ambiguous/unknown	PubMed	-	37102284
P15056	BRAF	D587Y	D	587	Y	472	not assigned	ambiguous/unknown	PubMed	-	36579983
P15056	BRAF	D594A	D	594	A	479	not assigned	ambiguous/unknown	PubMed	-	37853469
P15056	BRAF	E501Q	E	501	Q	149	not assigned	ambiguous/unknown	PubMed	-	37151366
P15056	BRAF	G466A	G	466	A	40	not assigned	ambiguous/unknown	PubMed	-	38333370
P15056	BRAF	G466E	G	466	E	40	not assigned	ambiguous/unknown	PubMed	-	37503077
P15056	BRAF	G466V	G	466	V	40	not assigned	ambiguous/unknown	PubMed	-	38283732
P15056	BRAF	G469R	G	469	R	43	not assigned	ambiguous/unknown	PubMed	-	37115038
P15056	BRAF	G469V	G	469	V	43	not assigned	ambiguous/unknown	PubMed	-	37853469
P15056	BRAF	K601G	K	601	G	492	not assigned	ambiguous/unknown	PubMed	-	36835466
P15056	BRAF	K601N	K	601	N	492	not assigned	ambiguous/unknown	PubMed	-	37458522
P15056	BRAF	K601R	K	601	R	492	not assigned	ambiguous/unknown	PubMed	-	37953090
P15056	BRAF	L584I	L	584	I	434	not assigned	ambiguous/unknown	PubMed	-	36579983
P15056	BRAF	L597L	L	597	L	-	not assigned	ambiguous/unknown	PubMed	-	36579983
P15056	BRAF	L597Q	L	597	Q	482	not assigned	ambiguous/unknown	PubMed	-	36973199
P15056	BRAF	N581K	N	581	K	431	not assigned	ambiguous/unknown	PubMed	-	37533985
P15056	BRAF	Q612P	Q	612	P	528	not assigned	ambiguous/unknown	PubMed	-	38130275
P15056	BRAF	S616F	S	616	F	536	not assigned	ambiguous/unknown	PubMed	-	36579983
P15056	BRAF	S616T	S	616	T	536	not assigned	ambiguous/unknown	PubMed	-	38019223
P15056	BRAF	T599R	T	599	R	485	not assigned	ambiguous/unknown	PubMed	-	38165745
P15056	BRAF	T599S	T	599	S	485	not assigned	ambiguous/unknown	PubMed	-	36579983
P15056	BRAF	V600D	V	600	D	491	not assigned	ambiguous/unknown	PubMed	-	37756677
P15056	BRAF	V600M	V	600	M	491	not assigned	ambiguous/unknown	PubMed	-	37065428
P15056	BRAF	W604L	W	604	L	503	not assigned	ambiguous/unknown	PubMed	-	37530550
P15056	BRAF	W619R	W	619	R	540	not assigned	ambiguous/unknown	PubMed	-	36579983
P15056	BRAF	Y633H	Y	633	H	579	not assigned	ambiguous/unknown	PubMed	-	37123657
Q8TDC3	BRSK1	G749S	G	749	S	-	germline	neutral	gnomAD	AF=0.109422, allele-count=122487, n-homozygotes=5825	32461654
Q8IWQ3	BRSK2	G578A	G	578	A	-	germline	neutral	gnomAD	AF=0.00861557, allele-count=12499, n-homozygotes=69	32461654
Q06187	BTK	L528W	L	528	W	433	somatic	resistance	PubMed	-	37373521,37706363,37716293,38187560,38313250
Q06187	BTK	T474I	T	474	I	233	somatic	resistance	PubMed	-	37706363,38187560,38313250
Q06187	BTK	C481F	C	481	F	241	somatic	resistance	PubMed	-	36947202
Q06187	BTK	R562Q	R	562	Q	539	not assigned	ambiguous/unknown	PubMed	-	37197664
Q06187	BTK	Y418H	Y	418	H	48	not assigned	ambiguous/unknown	PubMed	-	38265673
O43683	BUB1	A226V	A	226	V	-	germline	neutral	gnomAD	AF=0.00320326, allele-count=4682, n-homozygotes=10	32461654
O60566	BUB1B	N1032H	N	1032	H	-	germline	neutral	gnomAD	AF=0.00116015, allele-count=1696, n-homozygotes=3	32461654
Q14012	CAMK1	G3E	G	3	E	12	germline	neutral	gnomAD	AF=0.00114863, allele-count=1679, n-homozygotes=9	32461654
Q96NX5	CAMK1G	S10G	S	10	G	16	germline	neutral	gnomAD	AF=0.00153100, allele-count=2238, n-homozygotes=8	32461654
Q96NX5	CAMK1G	E259Q	E	259	Q	824	germline	neutral	gnomAD	AF=0.00175530, allele-count=2566, n-homozygotes=5	32461654
Q9UQM7	CAMK2A	T286A	T	286	A	867	not assigned	ambiguous/unknown	PubMed	-	37186439
Q13554	CAMK2B	K299E	K	299	E	879	not assigned	ambiguous/unknown	PubMed	-	37734707
Q13554	CAMK2B	L443V	L	443	V	-	not assigned	ambiguous/unknown	PubMed	-	37734707
Q13557	CAMK2D	R275H	R	275	H	855	not assigned	ambiguous/unknown	PubMed	-	37372357
Q16566	CAMK4	A413V	A	413	V	-	germline	neutral	gnomAD	AF=0.00183760, allele-count=2686, n-homozygotes=8	32461654
Q8N5S9	CAMKK1	E375G	E	375	G	699	germline	neutral	gnomAD	AF=0.454610, allele-count=663216, n-homozygotes=154821	32461654
O14936	CASK	N655D	N	655	D	-	not assigned	ambiguous/unknown	PubMed	-	38440102
Q9Y5S2	CDC42BPB	D1575H	D	1575	H	-	germline	neutral	gnomAD	AF=0.00186484, allele-count=2726, n-homozygotes=7	32461654
Q6DT37	CDC42BPG	S1482R	S	1482	R	-	germline	neutral	gnomAD	AF=0.00146171, allele-count=2036, n-homozygotes=52	32461654
Q6DT37	CDC42BPG	R1237W	R	1237	W	-	germline	neutral	gnomAD	AF=0.00650149, allele-count=9470, n-homozygotes=492	32461654
Q6DT37	CDC42BPG	G1211S	G	1211	S	-	germline	neutral	gnomAD	AF=0.00101855, allele-count=1479, n-homozygotes=3	32461654
Q6DT37	CDC42BPG	A1048T	A	1048	T	-	germline	neutral	gnomAD	AF=0.0359968, allele-count=52443, n-homozygotes=1188	32461654
Q6DT37	CDC42BPG	K586E	K	586	E	-	germline	neutral	gnomAD	AF=0.00183682, allele-count=2684, n-homozygotes=78	32461654
Q6DT37	CDC42BPG	V201I	V	201	I	432	germline	neutral	gnomAD	AF=0.00661773, allele-count=9663, n-homozygotes=42	32461654
O00311	CDC7	I208M	I	208	M	-	germline	neutral	gnomAD	AF=0.00316865, allele-count=4630, n-homozygotes=11	32461654
P21127	CDK11B	D620E	D	620	E	587	germline	neutral	gnomAD	AF=0.0210884, allele-count=27315, n-homozygotes=3	32461654
Q9NYV4	CDK12	P1266L	P	1266	L	-	germline	neutral	gnomAD	AF=0.0157591, allele-count=23008, n-homozygotes=253	32461654
Q14004	CDK13	P356A	P	356	A	-	germline	neutral	gnomAD	AF=0.00346790, allele-count=4574, n-homozygotes=14	32461654
Q14004	CDK13	T727I	T	727	I	79	germline	neutral	gnomAD	AF=0.00178644, allele-count=2585, n-homozygotes=5	32461654
Q8IZL9	CDK20	R179C	R	179	C	577	germline	neutral	gnomAD	AF=0.00182991, allele-count=2675, n-homozygotes=3	32461654
P11802	CDK4	G201D	G	201	D	592	not assigned	ambiguous/unknown	PubMed	-	37061341
P11802	CDK4	G201R	G	201	R	592	not assigned	ambiguous/unknown	PubMed	-	37061341
Q00534	CDK6	K43M	K	43	M	96	experimental	loss/decrease	PubMed	-	37664186,38316780
Q00534	CDK6	R31C	R	31	C	53	experimental	activating/increase	PubMed	-	37664186
Q00534	CDK6	S317C	S	317	C	869	germline	neutral	gnomAD	AF=0.00247858, allele-count=3623, n-homozygotes=18	32461654
P49336	CDK8	R200Q	R	200	Q	541	not assigned	ambiguous/unknown	PubMed	-	38193604
P50750	CDK9	L156F	L	156	F	433	somatic	resistance	PubMed	-	37719386
Q92772	CDKL2	D273N	D	273	N	828	germline	neutral	gnomAD	AF=0.00118411, allele-count=1729, n-homozygotes=31	32461654
Q8IVW4	CDKL3	R478G	R	478	G	-	germline	neutral	gnomAD	AF=0.0123214, allele-count=17787, n-homozygotes=151	32461654
Q8IVW4	CDKL3	M394T	M	394	T	-	germline	neutral	gnomAD	AF=0.00237335, allele-count=3469, n-homozygotes=6	32461654
Q8IVW4	CDKL3	V332I	V	332	I	-	germline	neutral	gnomAD	AF=0.00116838, allele-count=1699, n-homozygotes=13	32461654
Q5MAI5	CDKL4	F228C	F	228	C	707	germline	neutral	gnomAD	AF=0.00148450, allele-count=2168, n-homozygotes=6	32461654
Q5MAI5	CDKL4	R53H	R	53	H	151	germline	neutral	gnomAD	AF=0.00445142, allele-count=6411, n-homozygotes=13	32461654
O14757	CHEK1	P188P	P	188	P	-	not assigned	ambiguous/unknown	PubMed	-	36919124
O96017	CHEK2	E321A	E	321	A	366	tumor-predisposition	loss/decrease	PubMed	-	38367672
O96017	CHEK2	T476M	T	476	M	834	tumor-predisposition	loss/decrease	PubMed	-	36368126
O96017	CHEK2	D438Y	D	438	Y	651	not assigned	ambiguous/unknown	PubMed	-	36529819,36653541
O96017	CHEK2	R180C	R	180	C	-	not assigned	ambiguous/unknown	PubMed	-	37480761,37694253
O96017	CHEK2	E450K	E	450	K	695	not assigned	ambiguous/unknown	PubMed	-	38418842
O96017	CHEK2	F238L	F	238	L	53	not assigned	ambiguous/unknown	PubMed	-	36919124
O96017	CHEK2	S428F	S	428	F	631	not assigned	ambiguous/unknown	PubMed	-	36712083
O15111	CHUK	S126C	S	126	C	379	germline	neutral	gnomAD	AF=0.00128090, allele-count=1782, n-homozygotes=5	32461654
Q9UPZ9	CILK1	V320I	V	320	I	-	germline	neutral	gnomAD	AF=0.0821791, allele-count=120118, n-homozygotes=5396	32461654
O14578	CIT	I1681V	I	1681	V	-	germline	neutral	gnomAD	AF=0.00293749, allele-count=4269, n-homozygotes=177	32461654
O14578	CIT	N1122S	N	1122	S	-	germline	neutral	gnomAD	AF=0.00168868, allele-count=2455, n-homozygotes=5	32461654
O14578	CIT	S308C	S	308	C	638	germline	neutral	gnomAD	AF=0.0162235, allele-count=23715, n-homozygotes=242	32461654
P49760	CLK2	R56Q	R	56	Q	-	germline	neutral	gnomAD	AF=0.00109947, allele-count=1596, n-homozygotes=2	32461654
P49760	CLK2	R45H	R	45	H	-	germline	neutral	gnomAD	AF=0.00170669, allele-count=2493, n-homozygotes=4	32461654
P49760	CLK2	R19S	R	19	S	-	germline	neutral	gnomAD	AF=0.00240445, allele-count=3515, n-homozygotes=5	32461654
Q9HAZ1	CLK4	I363V	I	363	V	591	germline	neutral	gnomAD	AF=0.00198002, allele-count=2888, n-homozygotes=9	32461654
Q9HAZ1	CLK4	R24C	R	24	C	-	germline	neutral	gnomAD	AF=0.00424692, allele-count=6208, n-homozygotes=22	32461654
P07333	CSF1R	G795A	G	795	A	478	somatic	resistance	PubMed	-	36584406,37516973
P07333	CSF1R	M875I	M	875	I	676	not assigned	ambiguous/unknown	PubMed	-	37434390
P07333	CSF1R	T833M	T	833	M	582	not assigned	ambiguous/unknown	PubMed	-	37431483
P07333	CSF1R	E920D	E	920	D	860	germline	neutral	gnomAD	AF=0.00261105, allele-count=3817, n-homozygotes=11	32461654
P07333	CSF1R	G747R	G	747	R	355	germline	neutral	gnomAD	AF=0.00171508, allele-count=2507, n-homozygotes=4	32461654
P07333	CSF1R	H362R	H	362	R	-	germline	neutral	gnomAD	AF=0.0787019, allele-count=107721, n-homozygotes=5784	32461654
P07333	CSF1R	A245S	A	245	S	-	germline	neutral	gnomAD	AF=0.00270024, allele-count=3937, n-homozygotes=163	32461654
P49674	CSNK1E	S408N	S	408	N	-	germline	neutral	gnomAD	AF=0.00118476, allele-count=1723, n-homozygotes=62	32461654
P78368	CSNK1G2	V173L	V	173	L	434	germline	neutral	gnomAD	AF=0.00594699, allele-count=8624, n-homozygotes=36	32461654
P78368	CSNK1G2	T355A	T	355	A	-	germline	neutral	gnomAD	AF=0.0154934, allele-count=22530, n-homozygotes=380	32461654
P68400	CSNK2A1	R21Q	R	21	Q	13	not assigned	ambiguous/unknown	PubMed	-	36588763
P53355	DAPK1	W305D	W	305	D	882	not assigned	ambiguous/unknown	PubMed	-	36291604
P53355	DAPK1	W305Y	W	305	Y	882	not assigned	ambiguous/unknown	PubMed	-	36291604
P53355	DAPK1	V658L	V	658	L	-	germline	neutral	gnomAD	AF=0.00286300, allele-count=3740, n-homozygotes=12	32461654
Q9UIK4	DAPK2	R68Q	R	68	Q	143	germline	neutral	gnomAD	AF=0.00452990, allele-count=6622, n-homozygotes=24	32461654
Q9UIK4	DAPK2	R60Q	R	60	Q	117	germline	neutral	gnomAD	AF=0.00588416, allele-count=8600, n-homozygotes=27	32461654
Q8N568	DCLK2	I374L	I	374	L	11	germline	neutral	gnomAD	AF=0.00334113, allele-count=4882, n-homozygotes=8	32461654
Q8N568	DCLK2	N692H	N	692	H	-	germline	neutral	gnomAD	AF=0.00132699, allele-count=1939, n-homozygotes=7	32461654
Q9C098	DCLK3	A189E	A	189	E	-	germline	neutral	gnomAD	AF=0.00102227, allele-count=1494, n-homozygotes=27	32461654
Q08345	DDR1	I365F	I	365	F	-	germline	neutral	gnomAD	AF=0.00465518, allele-count=6687, n-homozygotes=20	32461654
Q08345	DDR1	N502S	N	502	S	-	germline	neutral	gnomAD	AF=0.0104182, allele-count=15115, n-homozygotes=145	32461654
Q09013	DMPK	T544M	T	544	M	-	germline	neutral	gnomAD	AF=0.0163554, allele-count=23701, n-homozygotes=228	32461654
Q09013	DMPK	R493C	R	493	C	-	germline	neutral	gnomAD	AF=0.00113457, allele-count=1608, n-homozygotes=2	32461654
Q6XUX3	DSTYK	R739W	R	739	W	239	germline	neutral	gnomAD	AF=0.00204136, allele-count=2917, n-homozygotes=33	32461654
Q6XUX3	DSTYK	L64F	L	64	F	-	germline	neutral	gnomAD	AF=0.0203286, allele-count=29674, n-homozygotes=504	32461654
Q13627	DYRK1A	T356A	T	356	A	601	germline	neutral	gnomAD	AF=0.00156376, allele-count=2285, n-homozygotes=5	32461654
Q9Y463	DYRK1B	D608A	D	608	A	-	germline	neutral	gnomAD	AF=0.00631077, allele-count=3566, n-homozygotes=2	32461654
Q9Y463	DYRK1B	P578S	P	578	S	-	germline	neutral	gnomAD	AF=0.00152300, allele-count=2200, n-homozygotes=7	32461654
O43781	DYRK3	R232Q	R	232	Q	83	germline	neutral	gnomAD	AF=0.00148166, allele-count=2166, n-homozygotes=60	32461654
Q9NR20	DYRK4	Q54H	Q	54	H	-	germline	neutral	gnomAD	AF=0.0201275, allele-count=29424, n-homozygotes=355	32461654
Q9NR20	DYRK4	A61T	A	61	T	-	germline	neutral	gnomAD	AF=0.00488342, allele-count=7139, n-homozygotes=275	32461654
P00533	EGFR	N540K	N	540	K	-	somatic	resistance	PubMed	-	37377403,38437671
P00533	EGFR	G724S	G	724	S	43	somatic	resistance	PubMed	-	36505860
P00533	EGFR	L718M	L	718	M	37	somatic	resistance	PubMed	-	38396251
P00533	EGFR	L747S	L	747	S	98	experimental	activating/increase/resistance	PubMed	-	37168336
P00533	EGFR	R776L	R	776	L	180	somatic	activating/increase	PubMed	-	38335691
P00533	EGFR	S645C	S	645	C	-	somatic	activating/increase	PubMed	-	37842288
P00533	EGFR	Y891D	Y	891	D	579	somatic	loss/decrease	PubMed	destabilizing	38182677
P00533	EGFR	L833V	L	833	V	418	not assigned	ambiguous/unknown	PubMed	-	36531621,36923435,36935243,37227041,37251951,37719840,37989343
P00533	EGFR	H835L	H	835	L	423	not assigned	ambiguous/unknown	PubMed	-	36531621,36935243,37227041,37719840,37989343
P00533	EGFR	G719C	G	719	C	38	not assigned	ambiguous/unknown	PubMed	-	36610238,38035047,38357203
P00533	EGFR	R776H	R	776	H	180	not assigned	ambiguous/unknown	PubMed	-	36698436,37274482,37663150
P00533	EGFR	E709A	E	709	A	27	not assigned	ambiguous/unknown	PubMed	-	36460861,36583000
P00533	EGFR	V843I	V	843	I	432	not assigned	ambiguous/unknown	PubMed	-	37209596,37274482
P00533	EGFR	A289T	A	289	T	-	not assigned	ambiguous/unknown	PubMed	-	36566697
P00533	EGFR	A871G	A	871	G	526	not assigned	ambiguous/unknown	PubMed	-	37831287
P00533	EGFR	D587Y	D	587	Y	-	not assigned	ambiguous/unknown	PubMed	-	36579983
P00533	EGFR	D855A	D	855	A	479	not assigned	ambiguous/unknown	PubMed	-	36555475
P00533	EGFR	E709K	E	709	K	27	not assigned	ambiguous/unknown	PubMed	-	36307041
P00533	EGFR	G779A	G	779	A	184	not assigned	ambiguous/unknown	PubMed	-	36555475
P00533	EGFR	I853A	I	853	A	477	not assigned	ambiguous/unknown	PubMed	-	36555475
P00533	EGFR	K28S	K	28	S	-	not assigned	ambiguous/unknown	PubMed	-	36639559
P00533	EGFR	K454A	K	454	A	-	not assigned	ambiguous/unknown	PubMed	-	36716934
P00533	EGFR	K714N	K	714	N	33	not assigned	ambiguous/unknown	PubMed	-	36849873
P00533	EGFR	K860I	K	860	I	485	not assigned	ambiguous/unknown	PubMed	-	37639432
P00533	EGFR	L730R	L	730	R	53	not assigned	ambiguous/unknown	PubMed	-	38435447
P00533	EGFR	L747A	L	747	A	98	not assigned	ambiguous/unknown	PubMed	-	37639432
P00533	EGFR	L792A	L	792	A	235	not assigned	ambiguous/unknown	PubMed	-	36555475
P00533	EGFR	N842A	N	842	A	431	not assigned	ambiguous/unknown	PubMed	-	36555475
P00533	EGFR	P848L	P	848	L	472	not assigned	ambiguous/unknown	PubMed	-	37274482
P00533	EGFR	Q791A	Q	791	A	234	not assigned	ambiguous/unknown	PubMed	-	36555475
P00533	EGFR	R222C	R	222	C	-	not assigned	ambiguous/unknown	PubMed	-	36730386
P00533	EGFR	R255A	R	255	A	-	not assigned	ambiguous/unknown	PubMed	-	36716934
P00533	EGFR	R297A	R	297	A	-	not assigned	ambiguous/unknown	PubMed	-	36716934
P00533	EGFR	R841A	R	841	A	430	not assigned	ambiguous/unknown	PubMed	-	36555475
P00533	EGFR	T263P	T	263	P	-	not assigned	ambiguous/unknown	PubMed	-	37273450
P00533	EGFR	T854A	T	854	A	478	not assigned	ambiguous/unknown	PubMed	-	36626541
P00533	EGFR	V769M	V	769	M	159	not assigned	ambiguous/unknown	PubMed	-	36397236
P00533	EGFR	V834L	V	834	L	419	not assigned	ambiguous/unknown	PubMed	-	36923435
P00533	EGFR	V843A	V	843	A	432	not assigned	ambiguous/unknown	PubMed	-	36555475
P00533	EGFR	V774M	V	774	M	178	not assigned	ambiguous/unknown	PubMed	inferred	37251951
Q9BQI3	EIF2AK1	W392R	W	392	R	-	germline	neutral	gnomAD	AF=0.00125456, allele-count=1833, n-homozygotes=43	32461654
Q9NZJ5	EIF2AK3	E672K	E	672	K	-	germline	neutral	gnomAD	AF=0.00104116, allele-count=1522, n-homozygotes=23	32461654
Q9NZJ5	EIF2AK3	D566V	D	566	V	3	germline	neutral	gnomAD	AF=0.00431700, allele-count=6307, n-homozygotes=20	32461654
Q9NZJ5	EIF2AK3	A52T	A	52	T	-	germline	neutral	gnomAD	AF=0.00479945, allele-count=6483, n-homozygotes=20	32461654
Q9P2K8	EIF2AK4	R182K	R	182	K	-	germline	neutral	gnomAD	AF=0.00119780, allele-count=1746, n-homozygotes=3	32461654
P21709	EPHA1	P460L	P	460	L	-	germline	loss/decrease	PubMed	-	38184788
P21709	EPHA1	R966H	R	966	H	-	germline	neutral	gnomAD	AF=0.00137290, allele-count=2007, n-homozygotes=5	32461654
P21709	EPHA1	R471Q	R	471	Q	-	germline	neutral	gnomAD	AF=0.00269999, allele-count=3947, n-homozygotes=26	32461654
P21709	EPHA1	R24H	R	24	H	-	germline	neutral	gnomAD	AF=0.0214473, allele-count=17160, n-homozygotes=1346	32461654
Q5JZY3	EPHA10	V1006M	V	1006	M	-	germline	neutral	gnomAD	AF=0.00219362, allele-count=3196, n-homozygotes=85	32461654
Q5JZY3	EPHA10	A955T	A	955	T	-	germline	neutral	gnomAD	AF=0.0172846, allele-count=25251, n-homozygotes=293	32461654
Q5JZY3	EPHA10	A642V	A	642	V	27	germline	neutral	gnomAD	AF=0.00111569, allele-count=1631, n-homozygotes=36	32461654
Q5JZY3	EPHA10	R618H	R	618	H	-	germline	neutral	gnomAD	AF=0.00465783, allele-count=6807, n-homozygotes=28	32461654
Q5JZY3	EPHA10	S574L	S	574	L	-	germline	neutral	gnomAD	AF=0.00122957, allele-count=1796, n-homozygotes=38	32461654
Q5JZY3	EPHA10	A532T	A	532	T	-	germline	neutral	gnomAD	AF=0.00149347, allele-count=2183, n-homozygotes=50	32461654
Q5JZY3	EPHA10	C389W	C	389	W	-	germline	neutral	gnomAD	AF=0.00274142, allele-count=3083, n-homozygotes=8	32461654
Q5JZY3	EPHA10	R69C	R	69	C	-	germline	neutral	gnomAD	AF=0.00156138, allele-count=2266, n-homozygotes=7	32461654
P29317	EPHA2	G668D	G	668	D	155	not assigned	ambiguous/unknown	PubMed	-	37714253
P29317	EPHA2	P817H	P	817	H	610	not assigned	ambiguous/unknown	PubMed	-	36377249
P29317	EPHA2	Q968H	Q	968	H	-	germline	neutral	gnomAD	AF=0.00248274, allele-count=3629, n-homozygotes=12	32461654
P29317	EPHA2	P350T	P	350	T	-	germline	neutral	gnomAD	AF=0.00280042, allele-count=4080, n-homozygotes=14	32461654
P29317	EPHA2	R315Q	R	315	Q	-	germline	neutral	gnomAD	AF=0.00223855, allele-count=3271, n-homozygotes=10	32461654
P29317	EPHA2	S277L	S	277	L	-	germline	neutral	gnomAD	AF=0.00554511, allele-count=8103, n-homozygotes=34	32461654
P29317	EPHA2	L41V	L	41	V	-	germline	neutral	gnomAD	AF=0.00111641, allele-count=1632, n-homozygotes=23	32461654
P29320	EPHA3	W790C	W	790	C	540	not assigned	ambiguous/unknown	PubMed	-	37813626
P29320	EPHA3	A777G	A	777	G	508	germline	neutral	gnomAD	AF=0.00153884, allele-count=2249, n-homozygotes=3	32461654
P29320	EPHA3	R914H	R	914	H	-	germline	neutral	gnomAD	AF=0.0844961, allele-count=123476, n-homozygotes=5459	32461654
Q15375	EPHA7	L749F	L	749	F	391	not assigned	ambiguous/unknown	PubMed	-	37813626
Q15375	EPHA7	Q675P	Q	675	P	121	germline	neutral	gnomAD	AF=0.00117289, allele-count=1714, n-homozygotes=2	32461654
Q15375	EPHA7	A245T	A	245	T	-	germline	neutral	gnomAD	AF=0.00114112, allele-count=1668, n-homozygotes=6	32461654
P29322	EPHA8	N432D	N	432	D	-	germline	neutral	gnomAD	AF=0.00209291, allele-count=3059, n-homozygotes=2	32461654
P29322	EPHA8	Q525R	Q	525	R	-	germline	neutral	gnomAD	AF=0.00187826, allele-count=2725, n-homozygotes=3	32461654
P29322	EPHA8	P607H	P	607	H	3	germline	neutral	gnomAD	AF=0.00974815, allele-count=14243, n-homozygotes=86	32461654
P29322	EPHA8	R707C	R	707	C	218	germline	neutral	gnomAD	AF=0.00132154, allele-count=1931, n-homozygotes=32	32461654
P29322	EPHA8	V826M	V	826	M	593	germline	neutral	gnomAD	AF=0.00145522, allele-count=2126, n-homozygotes=2	32461654
P29322	EPHA8	R884H	R	884	H	834	germline	neutral	gnomAD	AF=0.00688903, allele-count=10062, n-homozygotes=52	32461654
P29322	EPHA8	V917I	V	917	I	875	germline	neutral	gnomAD	AF=0.00137987, allele-count=2004, n-homozygotes=2	32461654
P29322	EPHA8	L1005V	L	1005	V	-	germline	neutral	gnomAD	AF=0.00103293, allele-count=1452, n-homozygotes=4	32461654
P54762	EPHB1	C61Y	C	61	Y	-	not assigned	ambiguous/unknown	PubMed	-	38102712
P54762	EPHB1	D762N	D	762	N	479	not assigned	ambiguous/unknown	PubMed	-	38102712
P54762	EPHB1	G821R	G	821	R	604	not assigned	ambiguous/unknown	PubMed	-	38102712
P54762	EPHB1	R170W	R	170	W	-	not assigned	ambiguous/unknown	PubMed	-	38102712
P54762	EPHB1	R351L	R	351	L	-	not assigned	ambiguous/unknown	PubMed	-	38102712
P54762	EPHB1	R743W	R	743	W	424	not assigned	ambiguous/unknown	PubMed	-	38102712
P54762	EPHB1	R90C	R	90	C	-	not assigned	ambiguous/unknown	PubMed	-	38102712
P54762	EPHB1	V562I	V	562	I	-	germline	neutral	gnomAD	AF=0.00146369, allele-count=2139, n-homozygotes=17	32461654
P54762	EPHB1	T981M	T	981	M	-	germline	neutral	gnomAD	AF=0.00109014, allele-count=1587, n-homozygotes=5	32461654
P29323	EPHB2	S706F	S	706	F	241	experimental	loss/decrease	PubMed	-	38252844
P54753	EPHB3	S11P	S	11	P	-	germline	neutral	gnomAD	AF=0.00160817, allele-count=1624, n-homozygotes=3	32461654
P54753	EPHB3	L16R	L	16	R	-	germline	neutral	gnomAD	AF=0.00193002, allele-count=2068, n-homozygotes=53	32461654
P54760	EPHB4	C239S	C	239	S	-	not assigned	ambiguous/unknown	PubMed	-	38092051
P54760	EPHB4	V748A	V	748	A	434	not assigned	ambiguous/unknown	PubMed	-	37813626
P54760	EPHB4	P231S	P	231	S	-	germline	neutral	gnomAD	AF=0.00110190, allele-count=1563, n-homozygotes=2	32461654
P04626	ERBB2	L755S	L	755	S	98	somatic	resistance	PubMed	-	36410093,38287892
P04626	ERBB2	R784G	R	784	G	180	somatic	resistance	PubMed	-	36410093
P04626	ERBB2	S310F	S	310	F	-	not assigned	ambiguous/unknown	PubMed	-	36812689,38219954,38287892
P04626	ERBB2	D769H	D	769	H	148	not assigned	ambiguous/unknown	PubMed	-	38287892
P04626	ERBB2	L755P	L	755	P	98	not assigned	ambiguous/unknown	PubMed	-	37197637
P04626	ERBB2	S783I	S	783	I	179	not assigned	ambiguous/unknown	PubMed	-	38096714
P04626	ERBB2	V777L	V	777	L	159	not assigned	ambiguous/unknown	PubMed	-	38287892
P04626	ERBB2	A386D	A	386	D	-	germline	neutral	gnomAD	AF=0.00403913, allele-count=5904, n-homozygotes=22	32461654
P21860	ERBB3	G337R	G	337	R	-	somatic	resistance	PubMed	-	36969051
P21860	ERBB3	V943R	V	943	R	818	not assigned	ambiguous/unknown	PubMed	-	36618440
P21860	ERBB3	P30L	P	30	L	-	germline	neutral	gnomAD	AF=0.00171974, allele-count=2514, n-homozygotes=7	32461654
P21860	ERBB3	L795V	L	795	V	249	germline	neutral	gnomAD	AF=0.00170122, allele-count=2487, n-homozygotes=32	32461654
P21860	ERBB3	R1077W	R	1077	W	-	germline	neutral	gnomAD	AF=0.00158367, allele-count=2315, n-homozygotes=2	32461654
P21860	ERBB3	L1177I	L	1177	I	-	germline	neutral	gnomAD	AF=0.00397103, allele-count=5805, n-homozygotes=20	32461654
Q15303	ERBB4	E715K	E	715	K	27	experimental	activating/increase	PubMed	-	36860695
Q15303	ERBB4	N706D	N	706	D	18	germline	loss/decrease	PubMed	loss-of-function	38278691
Q15303	ERBB4	R687K	R	687	K	-	experimental	activating/increase	PubMed	-	36860695
Q15303	ERBB4	I658F	I	658	F	-	not assigned	ambiguous/unknown	PubMed	-	36584483
Q15303	ERBB4	Y86H	Y	86	H	-	not assigned	ambiguous/unknown	PubMed	-	38291418
Q15303	ERBB4	H374Q	H	374	Q	-	germline	neutral	gnomAD	AF=0.00207146, allele-count=3023, n-homozygotes=17	32461654
O75460	ERN1	R594C	R	594	C	87	not assigned	ambiguous/unknown	PubMed	-	38071801
O75460	ERN1	L914M	L	914	M	-	germline	neutral	gnomAD	AF=0.00335082, allele-count=4720, n-homozygotes=347	32461654
O75460	ERN1	E913G	E	913	G	-	germline	neutral	gnomAD	AF=0.00100137, allele-count=1408, n-homozygotes=4	32461654
O75460	ERN1	L474R	L	474	R	-	germline	neutral	gnomAD	AF=0.0111588, allele-count=15569, n-homozygotes=106	32461654
O75460	ERN1	A414T	A	414	T	-	germline	neutral	gnomAD	AF=0.00436860, allele-count=6295, n-homozygotes=17	32461654
Q76MJ5	ERN2	R918T	R	918	T	-	germline	neutral	gnomAD	AF=0.00121644, allele-count=1777, n-homozygotes=8	32461654
Q76MJ5	ERN2	A896G	A	896	G	-	germline	neutral	gnomAD	AF=0.00667579, allele-count=9758, n-homozygotes=53	32461654
Q76MJ5	ERN2	R537Q	R	537	Q	48	germline	neutral	gnomAD	AF=0.00144745, allele-count=2115, n-homozygotes=4	32461654
Q76MJ5	ERN2	V76I	V	76	I	-	germline	neutral	gnomAD	AF=0.00368094, allele-count=5381, n-homozygotes=65	32461654
P16591	FER	V128F	V	128	F	-	germline	neutral	gnomAD	AF=0.00613934, allele-count=8582, n-homozygotes=40	32461654
P16591	FER	M412V	M	412	V	-	germline	neutral	gnomAD	AF=0.00204198, allele-count=2968, n-homozygotes=100	32461654
P16591	FER	S738T	S	738	T	582	germline	neutral	gnomAD	AF=0.00197834, allele-count=2892, n-homozygotes=4	32461654
P07332	FES	P397R	P	397	R	-	germline	neutral	gnomAD	AF=0.00160455, allele-count=2323, n-homozygotes=2	32461654
P07332	FES	P444L	P	444	L	-	germline	neutral	gnomAD	AF=0.00406619, allele-count=5829, n-homozygotes=16	32461654
P11362	FGFR1	D647N	D	647	N	491	somatic	activating/increase	PubMed	-	37778450
P11362	FGFR1	E670K	E	670	K	544	germline	loss/decrease	PubMed	-	36384729
P11362	FGFR1	D682N	D	682	N	587	not assigned	ambiguous/unknown	PubMed	-	38013637
P11362	FGFR1	D755N	D	755	N	851	not assigned	ambiguous/unknown	PubMed	-	37666053
P11362	FGFR1	G35R	G	35	R	-	not assigned	ambiguous/unknown	PubMed	-	37833774
P11362	FGFR1	K655I	K	655	I	524	not assigned	ambiguous/unknown	PubMed	-	36639714
P11362	FGFR1	P366L	P	366	L	-	not assigned	ambiguous/unknown	PubMed	-	38227553
P11362	FGFR1	R622Q	R	622	Q	424	not assigned	ambiguous/unknown	PubMed	-	37833774
P11362	FGFR1	P772S	P	772	S	868	germline	neutral	gnomAD	AF=0.00121764, allele-count=1780, n-homozygotes=38	32461654
P21802	FGFR2	S252W	S	252	W	-	somatic	activating/increase	PubMed	inferred from drug response	36307559,36376059,36394990,37348363,37582295,38246420
P21802	FGFR2	P253R	P	253	R	-	germline	activating/increase	PubMed	inferred	37348363,37582295,38239864
P21802	FGFR2	C382R	C	382	R	-	somatic/germline	activating/increase	PubMed	-	36376059,38326380
P21802	FGFR2	Y375C	Y	375	C	-	somatic	activating/increase	PubMed	-	37980453,38326380
P21802	FGFR2	K659E	K	659	E	525	experimental	activating/increase	PubMed	-	37254996
P21802	FGFR2	K659Q	K	659	Q	525	experimental	activating/increase	PubMed	-	37254996
P21802	FGFR2	K659T	K	659	T	525	experimental	activating/increase	PubMed	-	37254996
P21802	FGFR2	F276C	F	276	C	-	not assigned	ambiguous/unknown	PubMed	-	38326380
P21802	FGFR2	G271V	G	271	V	-	not assigned	ambiguous/unknown	PubMed	-	36755349
P21802	FGFR2	I654V	I	654	V	503	not assigned	ambiguous/unknown	PubMed	-	37505213
P21802	FGFR2	L551F	L	551	F	183	not assigned	ambiguous/unknown	PubMed	-	37377403
P21802	FGFR2	L610V	L	610	V	381	not assigned	ambiguous/unknown	PubMed	-	37377403
P21802	FGFR2	V667L	V	667	L	538	not assigned	ambiguous/unknown	PubMed	-	37377403
P21802	FGFR2	W290R	W	290	R	-	not assigned	ambiguous/unknown	PubMed	-	38409943
P21802	FGFR2	R6P	R	6	P	-	germline	neutral	gnomAD	AF=0.00202617, allele-count=2962, n-homozygotes=65	32461654
P22607	FGFR3	S249C	S	249	C	-	somatic	activating/increase	PubMed	-	36273937,36765573,37053347,37305616,37343207,37477495,37479885,37666053,37924117,37956738
P22607	FGFR3	N540K	N	540	K	180	germline	activating/increase	PubMed	-	36442838,37345656,37377403,37956738,37997980,38437671
P22607	FGFR3	V555M	V	555	M	233	somatic	resistance	PubMed	-	37956738,38437671
P22607	FGFR3	M528I	M	528	I	152	somatic	resistance	PubMed	-	37956738
P22607	FGFR3	N262Q	N	262	Q	-	experimental	activating/increase	PubMed	via stability	38244702
P22607	FGFR3	V553M	V	553	M	231	somatic	resistance	PubMed	-	37956738
P22607	FGFR3	D786N	D	786	N	-	not assigned	ambiguous/unknown	PubMed	-	37666053
P22607	FGFR3	E587Q	E	587	Q	357	not assigned	ambiguous/unknown	PubMed	-	37377403
P22607	FGFR3	G370C	G	370	C	-	not assigned	ambiguous/unknown	PubMed	-	37053347
P22607	FGFR3	L551F	L	551	F	227	not assigned	ambiguous/unknown	PubMed	-	37377403
P22607	FGFR3	L608V	L	608	V	391	not assigned	ambiguous/unknown	PubMed	-	37377403
P22607	FGFR3	R621C	R	621	C	430	not assigned	ambiguous/unknown	PubMed	-	37990933
P22607	FGFR3	R621H	R	621	H	430	not assigned	ambiguous/unknown	PubMed	-	37990933
P22607	FGFR3	S344C	S	344	C	-	not assigned	ambiguous/unknown	PubMed	-	37128991
P22607	FGFR3	S371C	S	371	C	-	not assigned	ambiguous/unknown	PubMed	-	37053347
P22607	FGFR3	T450M	T	450	M	9	not assigned	ambiguous/unknown	PubMed	-	36794128
P22607	FGFR3	V553L	V	553	L	231	not assigned	ambiguous/unknown	PubMed	-	37377403
P22607	FGFR3	V555L	V	555	L	233	not assigned	ambiguous/unknown	PubMed	-	37377403
P22455	FGFR4	C477A	C	477	A	41	experimental	activating/increase	PubMed	cysteine extracellular	36697897
P22455	FGFR4	C552A	C	552	A	235	experimental	activating/increase	PubMed	extracellular cysteine loss	36697897
P22455	FGFR4	N535K	N	535	K	180	somatic	resistance	PubMed	-	37437349
P22455	FGFR4	P413L	P	413	L	-	not assigned	ambiguous/unknown	PubMed	-	37789421
P22455	FGFR4	V10I	V	10	I	-	germline	neutral	gnomAD	AF=0.243322, allele-count=355547, n-homozygotes=46556	32461654
P17948	FLT1	P1127L	P	1127	L	806	not assigned	ambiguous/unknown	PubMed	-	37643816
P17948	FLT1	P1201L	P	1201	L	-	germline	neutral	gnomAD	AF=0.00415740, allele-count=6076, n-homozygotes=16	32461654
P17948	FLT1	I623V	I	623	V	-	germline	neutral	gnomAD	AF=0.00125250, allele-count=1831, n-homozygotes=2	32461654
P17948	FLT1	I548M	I	548	M	-	germline	neutral	gnomAD	AF=0.00130007, allele-count=1884, n-homozygotes=3	32461654
P17948	FLT1	R54S	R	54	S	-	germline	neutral	gnomAD	AF=0.00137182, allele-count=2001, n-homozygotes=25	32461654
P36888	FLT3	D698N	D	698	N	241	somatic	resistance	PubMed	-	36752538
P36888	FLT3	G846D	G	846	D	527	somatic	activating/increase/resistance	PubMed	-	38049555
P36888	FLT3	N676K	N	676	K	180	somatic	resistance	PubMed	-	36655425
P36888	FLT3	N701K	N	701	K	251	somatic	resistance	PubMed	-	37815132
P36888	FLT3	I836M	I	836	M	492	not assigned	ambiguous/unknown	PubMed	-	36542496
P35916	FLT4	E502K	E	502	K	-	not assigned	ambiguous/unknown	PubMed	-	37035731
P35916	FLT4	S1275R	S	1275	R	-	not assigned	ambiguous/unknown	PubMed	-	36538874
P35916	FLT4	S1275T	S	1275	T	-	not assigned	ambiguous/unknown	PubMed	-	36538874
P35916	FLT4	R1324L	R	1324	L	-	germline	neutral	gnomAD	AF=0.0985088, allele-count=143954, n-homozygotes=7563	32461654
P35916	FLT4	R1321Q	R	1321	Q	-	germline	neutral	gnomAD	AF=0.0146043, allele-count=21327, n-homozygotes=178	32461654
P35916	FLT4	R1320Q	R	1320	Q	-	germline	neutral	gnomAD	AF=0.00221475, allele-count=3237, n-homozygotes=116	32461654
P35916	FLT4	G1303A	G	1303	A	-	germline	neutral	gnomAD	AF=0.00306037, allele-count=4473, n-homozygotes=21	32461654
P35916	FLT4	P954S	P	954	S	268	germline	neutral	gnomAD	AF=0.00594247, allele-count=8519, n-homozygotes=32	32461654
P42685	FRK	V190I	V	190	I	-	not assigned	ambiguous/unknown	PubMed	-	37497183
P42685	FRK	I100V	I	100	V	-	germline	neutral	gnomAD	AF=0.00205829, allele-count=3009, n-homozygotes=4	32461654
O14976	GAK	R1123Q	R	1123	Q	-	germline	neutral	gnomAD	AF=0.00154774, allele-count=2258, n-homozygotes=4	32461654
O14976	GAK	T1051M	T	1051	M	-	germline	neutral	gnomAD	AF=0.0118235, allele-count=17230, n-homozygotes=185	32461654
O14976	GAK	P898L	P	898	L	-	germline	neutral	gnomAD	AF=0.00191715, allele-count=2753, n-homozygotes=3	32461654
O14976	GAK	E816K	E	816	K	-	germline	neutral	gnomAD	AF=0.00147960, allele-count=2102, n-homozygotes=38	32461654
O14976	GAK	H281Y	H	281	Y	699	germline	neutral	gnomAD	AF=0.00124850, allele-count=1822, n-homozygotes=10	32461654
Q15835	GRK1	L463P	L	463	P	872	not assigned	ambiguous/unknown	PubMed	-	36417138
Q15835	GRK1	R316S	R	316	S	424	not assigned	ambiguous/unknown	PubMed	-	36417138
Q15835	GRK1	I241T	I	241	T	152	germline	neutral	gnomAD	AF=0.00100777, allele-count=1473, n-homozygotes=25	32461654
P25098	GRK2	E88G	E	88	G	-	not assigned	ambiguous/unknown	PubMed	-	36552490
P32298	GRK4	P61L	P	61	L	-	germline	neutral	gnomAD	AF=0.00319560, allele-count=4665, n-homozygotes=13	32461654
P32298	GRK4	V247I	V	247	I	178	germline	neutral	gnomAD	AF=0.127455, allele-count=185283, n-homozygotes=13772	32461654
P32298	GRK4	H383Q	H	383	Q	606	germline	neutral	gnomAD	AF=0.00150229, allele-count=2196, n-homozygotes=3	32461654
P32298	GRK4	L425P	L	425	P	823	germline	neutral	gnomAD	AF=0.0183121, allele-count=26767, n-homozygotes=287	32461654
P43250	GRK6	A258T	A	258	T	219	germline	neutral	gnomAD	AF=0.00249793, allele-count=3624, n-homozygotes=11	32461654
P43250	GRK6	V334M	V	334	M	485	germline	neutral	gnomAD	AF=0.00185447, allele-count=2708, n-homozygotes=16	32461654
Q8WTQ7	GRK7	R81H	R	81	H	-	germline	neutral	gnomAD	AF=0.00237372, allele-count=3468, n-homozygotes=13	32461654
Q8WTQ7	GRK7	S127T	S	127	T	-	germline	neutral	gnomAD	AF=0.00548813, allele-count=8019, n-homozygotes=32	32461654
Q8WTQ7	GRK7	D402N	D	402	N	654	germline	neutral	gnomAD	AF=0.00394906, allele-count=5773, n-homozygotes=43	32461654
Q8WTQ7	GRK7	E443G	E	443	G	845	germline	neutral	gnomAD	AF=0.119656, allele-count=162907, n-homozygotes=10586	32461654
Q8WTQ7	GRK7	P460T	P	460	T	869	germline	neutral	gnomAD	AF=0.120491, allele-count=170777, n-homozygotes=11104	32461654
P49841	GSK3B	Y216E	Y	216	E	530	experimental	activating/increase	PubMed	-	37146915
P49841	GSK3B	Y216F	Y	216	F	530	experimental	loss/decrease	PubMed	-	37146915
P25092	GUCY2C	Q784K	Q	784	K	-	germline	neutral	gnomAD	AF=0.00125415, allele-count=1833, n-homozygotes=9	32461654
Q02846	GUCY2D	R838S	R	838	S	-	germline	activating/increase	PubMed	-	37361352
Q02846	GUCY2D	S25F	S	25	F	-	germline	neutral	gnomAD	AF=0.00374379, allele-count=5110, n-homozygotes=9	32461654
Q02846	GUCY2D	A52S	A	52	S	-	germline	neutral	gnomAD	AF=0.344752, allele-count=470659, n-homozygotes=87040	32461654
Q02846	GUCY2D	R365W	R	365	W	-	germline	neutral	gnomAD	AF=0.00113567, allele-count=1648, n-homozygotes=2	32461654
Q02846	GUCY2D	P575L	P	575	L	29	germline	neutral	gnomAD	AF=0.00164802, allele-count=2408, n-homozygotes=62	32461654
P51841	GUCY2F	N495H	N	495	H	-	germline	neutral	gnomAD	AF=0.00104945, allele-count=986, n-homozygotes=12	32461654
P51841	GUCY2F	Y324H	Y	324	H	-	germline	neutral	gnomAD	AF=0.00184278, allele-count=2020, n-homozygotes=8	32461654
P51841	GUCY2F	Q105H	Q	105	H	-	germline	neutral	gnomAD	AF=0.00139393, allele-count=1529, n-homozygotes=13	32461654
Q9H2X6	HIPK2	V261M	V	261	M	179	not assigned	ambiguous/unknown	PubMed	-	37726403
Q9H422	HIPK3	R42W	R	42	W	-	germline	neutral	gnomAD	AF=0.00144952, allele-count=2119, n-homozygotes=3	32461654
Q9H422	HIPK3	G110E	G	110	E	-	germline	neutral	gnomAD	AF=0.00263517, allele-count=3852, n-homozygotes=8	32461654
Q8NE63	HIPK4	R481C	R	481	C	-	germline	neutral	gnomAD	AF=0.00120799, allele-count=1763, n-homozygotes=2	32461654
Q8NE63	HIPK4	T304N	T	304	N	789	germline	neutral	gnomAD	AF=0.00839327, allele-count=12258, n-homozygotes=63	32461654
P57058	HUNK	R427Q	R	427	Q	-	germline	neutral	gnomAD	AF=0.00223512, allele-count=3267, n-homozygotes=8	32461654
P57058	HUNK	M648T	M	648	T	-	germline	neutral	gnomAD	AF=0.00144677, allele-count=2115, n-homozygotes=3	32461654
P08069	IGF1R	R511Q	R	511	Q	-	not assigned	ambiguous/unknown	PubMed	-	36567534
P08069	IGF1R	V579F	V	579	F	-	not assigned	ambiguous/unknown	PubMed	-	38274107
P08069	IGF1R	R134H	R	134	H	-	germline	neutral	gnomAD	AF=0.00363318, allele-count=5311, n-homozygotes=16	32461654
O14920	IKBKB	A710T	A	710	T	-	not assigned	ambiguous/unknown	PubMed	-	32461654
O14920	IKBKB	E518K	E	518	K	-	not assigned	ambiguous/unknown	PubMed	-	36378426
O14920	IKBKB	S489G	S	489	G	-	not assigned	ambiguous/unknown	PubMed	-	36699297
O14920	IKBKB	T559M	T	559	M	-	not assigned	ambiguous/unknown	PubMed	-	36378426
P06213	INSR	D946E	D	946	E	-	germline	neutral	gnomAD	AF=0.00250718, allele-count=3665, n-homozygotes=5	32461654
P06213	INSR	S748L	S	748	L	-	germline	neutral	gnomAD	AF=0.00190449, allele-count=2784, n-homozygotes=8	32461654
P14616	INSRR	R554C	R	554	C	-	germline	neutral	gnomAD	AF=0.00197284, allele-count=2884, n-homozygotes=3	32461654
P14616	INSRR	C246R	C	246	R	-	germline	neutral	gnomAD	AF=0.00197005, allele-count=2879, n-homozygotes=2	32461654
P14616	INSRR	A127E	A	127	E	-	germline	neutral	gnomAD	AF=0.00189259, allele-count=2766, n-homozygotes=3	32461654
O43187	IRAK2	V203M	V	203	M	-	germline	neutral	gnomAD	AF=0.00168004, allele-count=2456, n-homozygotes=9	32461654
O43187	IRAK2	R214G	R	214	G	35	germline	neutral	gnomAD	AF=0.0610339, allele-count=89221, n-homozygotes=3044	32461654
O43187	IRAK2	L329V	L	329	V	405	germline	neutral	gnomAD	AF=0.00107488, allele-count=1571, n-homozygotes=29	32461654
O43187	IRAK2	T508M	T	508	M	-	germline	neutral	gnomAD	AF=0.00558335, allele-count=8162, n-homozygotes=29	32461654
Q9Y616	IRAK3	H57R	H	57	R	-	germline	neutral	gnomAD	AF=0.0135279, allele-count=19774, n-homozygotes=174	32461654
Q9Y616	IRAK3	R96H	R	96	H	-	germline	neutral	gnomAD	AF=0.00106392, allele-count=1555, n-homozygotes=3	32461654
Q9Y616	IRAK3	V134M	V	134	M	-	germline	neutral	gnomAD	AF=0.00114785, allele-count=1662, n-homozygotes=2	32461654
Q9Y616	IRAK3	N329D	N	329	D	523	germline	neutral	gnomAD	AF=0.00104395, allele-count=1526, n-homozygotes=5	32461654
Q9Y616	IRAK3	P466R	P	466	R	-	germline	neutral	gnomAD	AF=0.00106109, allele-count=1551, n-homozygotes=27	32461654
Q9NWZ3	IRAK4	D320Y	D	320	Y	435	germline	loss/decrease	PubMed	-	37744344
Q9NWZ3	IRAK4	Q29P	Q	29	P	-	germline	loss/decrease	PubMed	-	37744344
Q9NWZ3	IRAK4	G198E	G	198	E	43	not assigned	ambiguous/unknown	PubMed	-	38138875
Q9NWZ3	IRAK4	L318F	L	318	F	433	not assigned	ambiguous/unknown	PubMed	-	38138875
Q9NWZ3	IRAK4	L318S	L	318	S	433	not assigned	ambiguous/unknown	PubMed	-	38138875
Q08881	ITK	T504S	T	504	S	484	germline	neutral	gnomAD	AF=0.00119645, allele-count=1749, n-homozygotes=2	32461654
P23458	JAK1	V666G	V	666	G	-	experimental	loss/decrease	PubMed	-	37047778
P23458	JAK1	V651M	V	651	M	-	germline	neutral	gnomAD	AF=0.00127790, allele-count=1868, n-homozygotes=4	32461654
O60674	JAK2	G993A	G	993	A	478	somatic	resistance	PubMed	-	37290440
O60674	JAK2	H608N	H	608	N	173	tumor-predisposition	activating/increase	PubMed	-	36529225
O60674	JAK2	H608Y	H	608	Y	173	tumor-predisposition	activating/increase	PubMed	-	36529225
O60674	JAK2	L604F	L	604	F	159	germline	activating/increase	PubMed	-	37639050
O60674	JAK2	V617L	V	617	L	187	germline	activating/increase	PubMed	inferred by drug response	36483035
O60674	JAK2	R683S	R	683	S	439	not assigned	ambiguous/unknown	PubMed	-	36738086,37156894,38081125
O60674	JAK2	L611S	L	611	S	180	not assigned	ambiguous/unknown	PubMed	-	36327906,36483035
O60674	JAK2	E596A	E	596	A	148	not assigned	ambiguous/unknown	PubMed	-	37740650
O60674	JAK2	E846D	E	846	D	-	not assigned	ambiguous/unknown	PubMed	-	37239426
O60674	JAK2	G301R	G	301	R	-	not assigned	ambiguous/unknown	PubMed	-	38264737
O60674	JAK2	I670V	I	670	V	419	not assigned	ambiguous/unknown	PubMed	-	36810551
O60674	JAK2	I704V	I	704	V	485	not assigned	ambiguous/unknown	PubMed	-	37570280
O60674	JAK2	I724T	I	724	T	546	not assigned	ambiguous/unknown	PubMed	-	38197452
O60674	JAK2	N1108S	N	1108	S	825	not assigned	ambiguous/unknown	PubMed	-	36870884
O60674	JAK2	N622Y	N	622	Y	227	not assigned	ambiguous/unknown	PubMed	-	36327906
O60674	JAK2	R564L	R	564	L	55	not assigned	ambiguous/unknown	PubMed	-	36810551
O60674	JAK2	T875N	T	875	N	79	not assigned	ambiguous/unknown	PubMed	-	36811253
O60674	JAK2	W659R	W	659	R	383	not assigned	ambiguous/unknown	PubMed	-	36569004
O60674	JAK2	N1108S	N	1108	S	825	germline	neutral	gnomAD	AF=0.00340517, allele-count=4968, n-homozygotes=8	32461654
P52333	JAK3	Q988P	Q	988	P	530	somatic	activating/increase/resistance	PubMed	-	37712558
P52333	JAK3	P151R	P	151	R	-	germline	neutral	gnomAD	AF=0.00790747, allele-count=11511, n-homozygotes=52	32461654
P35968	KDR	G539R	G	539	R	-	germline	neutral	gnomAD	AF=0.00264474, allele-count=3863, n-homozygotes=5	32461654
P35968	KDR	L462V	L	462	V	-	germline	neutral	gnomAD	AF=0.00189304, allele-count=2767, n-homozygotes=6	32461654
P10721	KIT	V560G	V	560	G	2	somatic	resistance	PubMed	-	36383121,36612139,36682716,36895976,37025992,38334196
P10721	KIT	K509I	K	509	I	-	somatic	activating/increase	PubMed	-	36895976
P10721	KIT	L783V	L	783	V	391	somatic	resistance	PubMed	inferred	36267752
P10721	KIT	N828K	N	828	K	528	somatic	resistance	PubMed	-	36396684
P10721	KIT	P665L	P	665	L	219	germline	loss/decrease	PubMed	inferred	36438053
P10721	KIT	M541L	M	541	L	-	not assigned	ambiguous/unknown	PubMed	-	36478848,37863736,38222235
P10721	KIT	L678F	L	678	F	249	not assigned	ambiguous/unknown	PubMed	-	36733350,38226262
P10721	KIT	W557R	W	557	R	-	not assigned	ambiguous/unknown	PubMed	-	37311038,37371685
P10721	KIT	D820A	D	820	A	503	not assigned	ambiguous/unknown	PubMed	-	36779523
P10721	KIT	E554K	E	554	K	-	not assigned	ambiguous/unknown	PubMed	-	36948401
P10721	KIT	F522C	F	522	C	-	not assigned	ambiguous/unknown	PubMed	-	37638009
P10721	KIT	R420G	R	420	G	-	not assigned	ambiguous/unknown	PubMed	-	36357474
P10721	KIT	T661I	T	661	I	187	not assigned	ambiguous/unknown	PubMed	-	37357653
P10721	KIT	V560D	V	560	D	2	not assigned	ambiguous/unknown	PubMed	-	37724142
P10721	KIT	V399I	V	399	I	-	germline	neutral	gnomAD	AF=0.00106726, allele-count=1558, n-homozygotes=3	32461654
P10721	KIT	M541L	M	541	L	-	germline	neutral	gnomAD	AF=0.0972034, allele-count=142075, n-homozygotes=7400	32461654
Q8IVT5	KSR1	S406A	S	406	A	-	experimental	activating/increase	PubMed	-	36493900
Q8IVT5	KSR1	P285S	P	285	S	-	germline	neutral	gnomAD	AF=0.00294515, allele-count=4304, n-homozygotes=11	32461654
Q8IVT5	KSR1	P505L	P	505	L	-	germline	neutral	gnomAD	AF=0.00119086, allele-count=1730, n-homozygotes=8	32461654
Q6VAB6	KSR2	S904L	S	904	L	814	germline	neutral	gnomAD	AF=0.00153272, allele-count=2240, n-homozygotes=12	32461654
Q6VAB6	KSR2	H565Y	H	565	Y	-	germline	neutral	gnomAD	AF=0.00179994, allele-count=2603, n-homozygotes=47	32461654
Q6VAB6	KSR2	R554Q	R	554	Q	-	germline	neutral	gnomAD	AF=0.00842310, allele-count=12248, n-homozygotes=72	32461654
Q6VAB6	KSR2	D323E	D	323	E	-	germline	neutral	gnomAD	AF=0.00434674, allele-count=6352, n-homozygotes=126	32461654
Q6VAB6	KSR2	T175R	T	175	R	-	germline	neutral	gnomAD	AF=0.00154339, allele-count=2255, n-homozygotes=3	32461654
O95835	LATS1	P531S	P	531	S	-	germline	neutral	gnomAD	AF=0.00744929, allele-count=10890, n-homozygotes=58	32461654
O95835	LATS1	P266A	P	266	A	-	germline	neutral	gnomAD	AF=0.00202683, allele-count=2963, n-homozygotes=4	32461654
Q9NRM7	LATS2	L1025P	L	1025	P	-	germline	neutral	gnomAD	AF=0.00200084, allele-count=2925, n-homozygotes=7	32461654
Q9NRM7	LATS2	A203V	A	203	V	-	germline	neutral	gnomAD	AF=0.0181385, allele-count=26496, n-homozygotes=322	32461654
P06239	LCK	P440S	P	440	S	610	germline	loss/decrease	PubMed	-	37962568
P06239	LCK	T316I	T	316	I	233	somatic	resistance	PubMed	partial	37076694
P06239	LCK	C465R	C	465	R	762	not assigned	ambiguous/unknown	PubMed	-	38100037
P06239	LCK	L341P	L	341	P	371	not assigned	ambiguous/unknown	PubMed	-	38100037
P06239	LCK	Y505C	Y	505	C	862	not assigned	ambiguous/unknown	PubMed	-	38168306
P06239	LCK	R45Q	R	45	Q	-	germline	neutral	gnomAD	AF=0.00365103, allele-count=5313, n-homozygotes=338	32461654
P06239	LCK	G201S	G	201	S	-	germline	neutral	gnomAD	AF=0.00184491, allele-count=2697, n-homozygotes=3	32461654
Q8IWU2	LMTK2	L780M	L	780	M	-	germline	neutral	gnomAD	AF=0.487577, allele-count=712340, n-homozygotes=185669	32461654
Q8IWU2	LMTK2	S910I	S	910	I	-	germline	neutral	gnomAD	AF=0.00142259, allele-count=2079, n-homozygotes=57	32461654
Q8IWU2	LMTK2	S977R	S	977	R	-	germline	neutral	gnomAD	AF=0.00191605, allele-count=2801, n-homozygotes=14	32461654
Q96Q04	LMTK3	T1397I	T	1397	I	-	germline	neutral	gnomAD	AF=0.00183699, allele-count=2344, n-homozygotes=59	32461654
Q96Q04	LMTK3	V909A	V	909	A	-	germline	neutral	gnomAD	AF=0.0522762, allele-count=76381, n-homozygotes=3002	32461654
Q96Q04	LMTK3	G748E	G	748	E	-	germline	neutral	gnomAD	AF=0.00105075, allele-count=1171, n-homozygotes=3	32461654
Q38SD2	LRRK1	G68S	G	68	S	-	germline	neutral	gnomAD	AF=0.00748581, allele-count=8349, n-homozygotes=41	32461654
Q38SD2	LRRK1	K203E	K	203	E	-	germline	neutral	gnomAD	AF=0.00326493, allele-count=4718, n-homozygotes=159	32461654
Q38SD2	LRRK1	I224V	I	224	V	-	germline	neutral	gnomAD	AF=0.00445972, allele-count=6519, n-homozygotes=18	32461654
Q38SD2	LRRK1	L416M	L	416	M	-	germline	neutral	gnomAD	AF=0.0103366, allele-count=15109, n-homozygotes=101	32461654
Q38SD2	LRRK1	A461T	A	461	T	-	germline	neutral	gnomAD	AF=0.00124763, allele-count=1822, n-homozygotes=40	32461654
Q38SD2	LRRK1	P543S	P	543	S	-	germline	neutral	gnomAD	AF=0.00427132, allele-count=6244, n-homozygotes=15	32461654
Q38SD2	LRRK1	R631W	R	631	W	-	germline	neutral	gnomAD	AF=0.00132226, allele-count=1933, n-homozygotes=4	32461654
Q38SD2	LRRK1	V697I	V	697	I	-	germline	neutral	gnomAD	AF=0.00502993, allele-count=7352, n-homozygotes=31	32461654
Q38SD2	LRRK1	D866N	D	866	N	-	germline	neutral	gnomAD	AF=0.00232804, allele-count=3400, n-homozygotes=8	32461654
Q38SD2	LRRK1	G1702S	G	1702	S	-	germline	neutral	gnomAD	AF=0.00149331, allele-count=2183, n-homozygotes=4	32461654
Q38SD2	LRRK1	M1735V	M	1735	V	-	germline	neutral	gnomAD	AF=0.00100967, allele-count=1476, n-homozygotes=25	32461654
Q38SD2	LRRK1	P1796H	P	1796	H	-	germline	neutral	gnomAD	AF=0.00729992, allele-count=10671, n-homozygotes=55	32461654
Q38SD2	LRRK1	A1814T	A	1814	T	-	germline	neutral	gnomAD	AF=0.00373702, allele-count=5463, n-homozygotes=24	32461654
Q38SD2	LRRK1	L1835F	L	1835	F	-	germline	neutral	gnomAD	AF=0.00143584, allele-count=2099, n-homozygotes=24	32461654
Q38SD2	LRRK1	R1850C	R	1850	C	-	germline	neutral	gnomAD	AF=0.00700632, allele-count=10242, n-homozygotes=48	32461654
Q38SD2	LRRK1	G1938D	G	1938	D	-	germline	neutral	gnomAD	AF=0.307645, allele-count=449344, n-homozygotes=70265	32461654
Q5S007	LRRK2	F1700L	F	1700	L	-	germline	activating/increase	PubMed	-	36971062
Q5S007	LRRK2	W1295A	W	1295	A	-	experimental	loss/decrease	PubMed	-	36764356
Q5S007	LRRK2	G2385R	G	2385	R	-	not assigned	ambiguous/unknown	PubMed	-	36759515,37691886,37708949,37805635,38010914
Q5S007	LRRK2	R1628P	R	1628	P	-	not assigned	ambiguous/unknown	PubMed	-	36759515,36879366,37691886,38010914
Q5S007	LRRK2	Y1699C	Y	1699	C	-	not assigned	ambiguous/unknown	PubMed	-	37905053,38305913
Q5S007	LRRK2	A419V	A	419	V	-	not assigned	ambiguous/unknown	PubMed	-	36759515
Q5S007	LRRK2	I1371V	I	1371	V	-	not assigned	ambiguous/unknown	PubMed	-	37371062
Q5S007	LRRK2	N1437D	N	1437	D	-	not assigned	ambiguous/unknown	PubMed	-	37201327
Q5S007	LRRK2	N1437H	N	1437	H	-	not assigned	ambiguous/unknown	PubMed	-	38305913
Q5S007	LRRK2	N2081D	N	2081	D	651	not assigned	ambiguous/unknown	PubMed	-	37473971
Q5S007	LRRK2	Q1919A	Q	1919	A	148	not assigned	ambiguous/unknown	PubMed	-	37584472
Q5S007	LRRK2	R1398H	R	1398	H	-	not assigned	ambiguous/unknown	PubMed	-	36972292
Q5S007	LRRK2	S910A	S	910	A	-	not assigned	ambiguous/unknown	PubMed	-	37454104
Q5S007	LRRK2	S935A	S	935	A	-	not assigned	ambiguous/unknown	PubMed	-	37454104
Q5S007	LRRK2	S955A	S	955	A	-	not assigned	ambiguous/unknown	PubMed	-	37454104
Q5S007	LRRK2	S973A	S	973	A	-	not assigned	ambiguous/unknown	PubMed	-	37454104
Q5S007	LRRK2	T2524A	T	2524	A	-	not assigned	ambiguous/unknown	PubMed	-	37398189
Q5S007	LRRK2	L119P	L	119	P	-	germline	neutral	gnomAD	AF=0.00187094, allele-count=2713, n-homozygotes=4	32461654
Q5S007	LRRK2	E334K	E	334	K	-	germline	neutral	gnomAD	AF=0.00142220, allele-count=2073, n-homozygotes=18	32461654
Q5S007	LRRK2	R1398H	R	1398	H	-	germline	neutral	gnomAD	AF=0.0728022, allele-count=106332, n-homozygotes=4405	32461654
Q5S007	LRRK2	R1514Q	R	1514	Q	-	germline	neutral	gnomAD	AF=0.00719872, allele-count=10496, n-homozygotes=59	32461654
Q5S007	LRRK2	P1542S	P	1542	S	-	germline	neutral	gnomAD	AF=0.0317246, allele-count=46326, n-homozygotes=1065	32461654
Q5S007	LRRK2	N2081D	N	2081	D	651	germline	neutral	gnomAD	AF=0.0171251, allele-count=25013, n-homozygotes=356	32461654
P29376	LTK	S264C	S	264	C	-	germline	neutral	gnomAD	AF=0.00266464, allele-count=3326, n-homozygotes=6	32461654
P29376	LTK	R243Q	R	243	Q	-	germline	neutral	gnomAD	AF=0.0114205, allele-count=15173, n-homozygotes=110	32461654
P29376	LTK	P227L	P	227	L	-	germline	neutral	gnomAD	AF=0.0583132, allele-count=75729, n-homozygotes=2375	32461654
P20794	MAK	I547T	I	547	T	-	germline	neutral	gnomAD	AF=0.00336632, allele-count=4921, n-homozygotes=24	32461654
Q02750	MAP2K1	K97M	K	97	M	96	experimental	loss/decrease	PubMed	-	37842094
Q02750	MAP2K1	N122D	N	122	D	162	germline	activating/increase	PubMed	inferred	36313893
Q02750	MAP2K1	P124Q	P	124	Q	172	germline	activating/increase	PubMed	inferred	36777711
P46734	MAP2K3	S68P	S	68	P	35	germline	neutral	gnomAD	AF=0.496658, allele-count=697665, n-homozygotes=3	32461654
Q13233	MAP3K1	G102R	G	102	R	-	germline	neutral	gnomAD	AF=0.00122221, allele-count=1503, n-homozygotes=38	32461654
Q13233	MAP3K1	N255S	N	255	S	-	germline	neutral	gnomAD	AF=0.0256911, allele-count=37547, n-homozygotes=509	32461654
Q13233	MAP3K1	G616R	G	616	R	-	germline	neutral	gnomAD	AF=0.00102132, allele-count=1493, n-homozygotes=2	32461654
Q13233	MAP3K1	S939C	S	939	C	-	germline	neutral	gnomAD	AF=0.0201649, allele-count=29477, n-homozygotes=367	32461654
Q02779	MAP3K10	P651T	P	651	T	-	germline	neutral	gnomAD	AF=0.00416640, allele-count=5635, n-homozygotes=13	32461654
Q02779	MAP3K10	R850H	R	850	H	-	germline	neutral	gnomAD	AF=0.00124066, allele-count=1737, n-homozygotes=26	32461654
Q16584	MAP3K11	R730H	R	730	H	-	germline	neutral	gnomAD	AF=0.0151953, allele-count=20977, n-homozygotes=186	32461654
Q16584	MAP3K11	P626T	P	626	T	-	germline	neutral	gnomAD	AF=0.00107435, allele-count=1543, n-homozygotes=23	32461654
Q12852	MAP3K12	G640D	G	640	D	-	germline	neutral	gnomAD	AF=0.00107698, allele-count=1573, n-homozygotes=3	32461654
O43283	MAP3K13	G35E	G	35	E	-	germline	neutral	gnomAD	AF=0.00211440, allele-count=3091, n-homozygotes=5	32461654
O43283	MAP3K13	E44K	E	44	K	-	germline	neutral	gnomAD	AF=0.00468375, allele-count=6847, n-homozygotes=22	32461654
O43283	MAP3K13	V60M	V	60	M	-	germline	neutral	gnomAD	AF=0.00122173, allele-count=1786, n-homozygotes=7	32461654
O43283	MAP3K13	E712K	E	712	K	-	germline	neutral	gnomAD	AF=0.00391965, allele-count=5730, n-homozygotes=18	32461654
Q99558	MAP3K14	T764A	T	764	A	-	germline	neutral	gnomAD	AF=0.00299178, allele-count=4352, n-homozygotes=6	32461654
Q99558	MAP3K14	V516I	V	516	I	427	germline	neutral	gnomAD	AF=0.00172090, allele-count=2508, n-homozygotes=6	32461654
Q99558	MAP3K14	S140N	S	140	N	-	germline	neutral	gnomAD	AF=0.0102210, allele-count=14940, n-homozygotes=93	32461654
Q6ZN16	MAP3K15	N1029H	N	1029	H	-	germline	neutral	gnomAD	AF=0.00129176, allele-count=1417, n-homozygotes=11	32461654
Q6ZN16	MAP3K15	G786R	G	786	R	464	germline	neutral	gnomAD	AF=0.00123929, allele-count=1359, n-homozygotes=21	32461654
Q6ZN16	MAP3K15	R494C	R	494	C	-	germline	neutral	gnomAD	AF=0.0107202, allele-count=11432, n-homozygotes=57	32461654
Q6ZN16	MAP3K15	M457V	M	457	V	-	germline	neutral	gnomAD	AF=0.00200359, allele-count=2175, n-homozygotes=3	32461654
Q56UN5	MAP3K19	I1086T	I	1086	T	92	germline	neutral	gnomAD	AF=0.00176833, allele-count=2585, n-homozygotes=4	32461654
Q56UN5	MAP3K19	R583C	R	583	C	-	germline	neutral	gnomAD	AF=0.00186198, allele-count=2722, n-homozygotes=29	32461654
Q56UN5	MAP3K19	S690L	S	690	L	-	germline	neutral	gnomAD	AF=0.00395453, allele-count=5781, n-homozygotes=15	32461654
Q56UN5	MAP3K19	R675Q	R	675	Q	-	germline	neutral	gnomAD	AF=0.00133185, allele-count=1947, n-homozygotes=4	32461654
Q56UN5	MAP3K19	Y380H	Y	380	H	-	germline	neutral	gnomAD	AF=0.00574176, allele-count=8374, n-homozygotes=127	32461654
Q9Y2U5	MAP3K2	D140G	D	140	G	-	germline	neutral	gnomAD	AF=0.00174940, allele-count=2550, n-homozygotes=7	32461654
Q9NYL2	MAP3K20	T267M	T	267	M	857	germline	neutral	gnomAD	AF=0.00273921, allele-count=4004, n-homozygotes=152	32461654
Q9NYL2	MAP3K20	S531L	S	531	L	-	germline	neutral	gnomAD	AF=0.461487, allele-count=673632, n-homozygotes=163969	32461654
Q9NYL2	MAP3K20	Q547L	Q	547	L	-	germline	neutral	gnomAD	AF=0.00133369, allele-count=1949, n-homozygotes=4	32461654
Q9NYL2	MAP3K20	R580W	R	580	W	-	germline	neutral	gnomAD	AF=0.00169826, allele-count=2446, n-homozygotes=56	32461654
Q9NYL2	MAP3K20	Y773H	Y	773	H	-	germline	neutral	gnomAD	AF=0.0947841, allele-count=138322, n-homozygotes=7736	32461654
Q9NYL2	MAP3K20	K784T	K	784	T	-	germline	neutral	gnomAD	AF=0.00117757, allele-count=1698, n-homozygotes=41	32461654
Q5TCX8	MAP3K21	R4P	R	4	P	-	germline	neutral	gnomAD	AF=0.101719, allele-count=117547, n-homozygotes=6206	32461654
Q5TCX8	MAP3K21	E54D	E	54	D	-	germline	neutral	gnomAD	AF=0.00400948, allele-count=5335, n-homozygotes=125	32461654
Q5TCX8	MAP3K21	E563D	E	563	D	-	germline	neutral	gnomAD	AF=0.00353118, allele-count=5153, n-homozygotes=11	32461654
Q5TCX8	MAP3K21	S597F	S	597	F	-	germline	neutral	gnomAD	AF=0.00265743, allele-count=3870, n-homozygotes=6	32461654
Q5TCX8	MAP3K21	V728I	V	728	I	-	germline	neutral	gnomAD	AF=0.199372, allele-count=291422, n-homozygotes=31008	32461654
Q5TCX8	MAP3K21	E741D	E	741	D	-	germline	neutral	gnomAD	AF=0.200729, allele-count=293415, n-homozygotes=31425	32461654
Q5TCX8	MAP3K21	C784G	C	784	G	-	germline	neutral	gnomAD	AF=0.200653, allele-count=293296, n-homozygotes=31408	32461654
Q5TCX8	MAP3K21	P982L	P	982	L	-	germline	neutral	gnomAD	AF=0.00606956, allele-count=8873, n-homozygotes=39	32461654
Q99759	MAP3K3	I441M	I	441	M	231	somatic	activating/increase	PubMed	gain-of-function	36719480,36917268,36995941
Q99759	MAP3K3	E387D	E	387	D	91	not assigned	ambiguous/unknown	PubMed	-	37658401
Q9Y6R4	MAP3K4	V335I	V	335	I	-	germline	neutral	gnomAD	AF=0.00138319, allele-count=2022, n-homozygotes=45	32461654
Q9Y6R4	MAP3K4	Q584H	Q	584	H	-	germline	neutral	gnomAD	AF=0.00461730, allele-count=6749, n-homozygotes=19	32461654
Q9Y6R4	MAP3K4	N1003K	N	1003	K	-	germline	neutral	gnomAD	AF=0.00765719, allele-count=11193, n-homozygotes=53	32461654
Q99683	MAP3K5	I1214T	I	1214	T	-	germline	neutral	gnomAD	AF=0.0169783, allele-count=24819, n-homozygotes=271	32461654
Q99683	MAP3K5	F16L	F	16	L	-	germline	neutral	gnomAD	AF=0.0301400, allele-count=43242, n-homozygotes=772	32461654
O95382	MAP3K6	T455I	T	455	I	-	germline	neutral	gnomAD	AF=0.358910, allele-count=524403, n-homozygotes=97114	32461654
O43318	MAP3K7	T187I	T	187	I	527	germline	loss/decrease	PubMed	-	38383446
O43318	MAP3K7	Y206D	Y	206	D	579	not assigned	ambiguous/unknown	PubMed	-	37160697
P80192	MAP3K9	T925S	T	925	S	-	germline	neutral	gnomAD	AF=0.00175987, allele-count=2548, n-homozygotes=8	32461654
Q92918	MAP4K1	P312T	P	312	T	-	germline	neutral	gnomAD	AF=0.00120077, allele-count=1753, n-homozygotes=2	32461654
Q12851	MAP4K2	R580H	R	580	H	-	germline	neutral	gnomAD	AF=0.00696211, allele-count=9602, n-homozygotes=60	32461654
Q12851	MAP4K2	R384Q	R	384	Q	-	germline	neutral	gnomAD	AF=0.00190041, allele-count=2692, n-homozygotes=60	32461654
Q12851	MAP4K2	A120S	A	120	S	381	germline	neutral	gnomAD	AF=0.00685884, allele-count=10015, n-homozygotes=59	32461654
Q12851	MAP4K2	R111P	R	111	P	367	germline	neutral	gnomAD	AF=0.00463699, allele-count=6773, n-homozygotes=21	32461654
Q8IVH8	MAP4K3	I532V	I	532	V	-	germline	neutral	gnomAD	AF=0.00490746, allele-count=7157, n-homozygotes=31	32461654
Q8IVH8	MAP4K3	V200L	V	200	L	591	germline	neutral	gnomAD	AF=0.00498516, allele-count=7287, n-homozygotes=21	32461654
O95819	MAP4K4	K54R	K	54	R	96	somatic	loss/decrease	PubMed	-	37312710
P28482	MAPK1	D321N	D	321	N	860	somatic	activating/increase	PubMed	gain-of-function in various systems	37021821
P28482	MAPK1	E322K	E	322	K	861	somatic	activating/increase	PubMed	-	37021821
P53778	MAPK12	D171A	D	171	A	479	experimental	loss/decrease	PubMed	-	37458356
P53778	MAPK12	R355Q	R	355	Q	-	germline	neutral	gnomAD	AF=0.00416697, allele-count=5195, n-homozygotes=49	32461654
P53778	MAPK12	T244M	T	244	M	678	germline	neutral	gnomAD	AF=0.00169903, allele-count=2448, n-homozygotes=2	32461654
P53778	MAPK12	T103M	T	103	M	218	germline	neutral	gnomAD	AF=0.0386752, allele-count=56494, n-homozygotes=1881	32461654
O15264	MAPK13	S41L	S	41	L	48	germline	neutral	gnomAD	AF=0.0121726, allele-count=17767, n-homozygotes=130	32461654
O15264	MAPK13	R360Q	R	360	Q	-	germline	neutral	gnomAD	AF=0.00176763, allele-count=2584, n-homozygotes=2	32461654
Q16539	MAPK14	D343G	D	343	G	-	germline	neutral	gnomAD	AF=0.00106662, allele-count=1559, n-homozygotes=4	32461654
Q8TD08	MAPK15	G36S	G	36	S	83	germline	neutral	gnomAD	AF=0.00466036, allele-count=6803, n-homozygotes=25	32461654
Q8TD08	MAPK15	T264M	T	264	M	792	germline	neutral	gnomAD	AF=0.00170458, allele-count=2488, n-homozygotes=24	32461654
Q8TD08	MAPK15	P358L	P	358	L	-	germline	neutral	gnomAD	AF=0.0246469, allele-count=36015, n-homozygotes=904	32461654
Q8TD08	MAPK15	A373P	A	373	P	-	germline	neutral	gnomAD	AF=0.00131444, allele-count=1921, n-homozygotes=23	32461654
Q8TD08	MAPK15	G385D	G	385	D	-	germline	neutral	gnomAD	AF=0.0139487, allele-count=20381, n-homozygotes=191	32461654
Q8TD08	MAPK15	L424P	L	424	P	-	germline	neutral	gnomAD	AF=0.0203975, allele-count=29785, n-homozygotes=470	32461654
Q8TD08	MAPK15	G425E	G	425	E	-	germline	neutral	gnomAD	AF=0.00134032, allele-count=1957, n-homozygotes=47	32461654
Q8TD08	MAPK15	R470Q	R	470	Q	-	germline	neutral	gnomAD	AF=0.00232321, allele-count=3388, n-homozygotes=95	32461654
P27361	MAPK3	E323K	E	323	K	845	germline	neutral	gnomAD	AF=0.00170645, allele-count=2494, n-homozygotes=4	32461654
P31152	MAPK4	G17D	G	17	D	27	germline	neutral	gnomAD	AF=0.00177834, allele-count=2599, n-homozygotes=7	32461654
Q16659	MAPK6	L290V	L	290	V	814	germline	neutral	gnomAD	AF=0.0764343, allele-count=111581, n-homozygotes=4891	32461654
P49137	MAPKAPK2	T25A	T	25	A	-	germline	neutral	gnomAD	AF=0.0236097, allele-count=3072, n-homozygotes=106	32461654
P49137	MAPKAPK2	G51V	G	51	V	15	germline	neutral	gnomAD	AF=0.00549521, allele-count=7558, n-homozygotes=432	32461654
Q16644	MAPKAPK3	R65L	R	65	L	76	germline	neutral	gnomAD	AF=0.00257804, allele-count=3767, n-homozygotes=14	32461654
Q9P0L2	MARK1	A541P	A	541	P	-	germline	neutral	gnomAD	AF=0.00224107, allele-count=3273, n-homozygotes=70	32461654
Q7KZI7	MARK2	S578N	S	578	N	-	germline	neutral	gnomAD	AF=0.00109158, allele-count=1595, n-homozygotes=2	32461654
P27448	MARK3	K611Q	K	611	Q	-	germline	neutral	gnomAD	AF=0.00198280, allele-count=2896, n-homozygotes=4	32461654
P27448	MARK3	S734L	S	734	L	-	germline	neutral	gnomAD	AF=0.00143925, allele-count=2104, n-homozygotes=3	32461654
Q96L34	MARK4	F202L	F	202	L	482	germline	activating/increase	PubMed	-	38041405
Q96L34	MARK4	G30C	G	30	C	2	germline	neutral	gnomAD	AF=0.00104439, allele-count=1526, n-homozygotes=8	32461654
Q9Y2H9	MAST1	G517S	G	517	S	481	not assigned	ambiguous/unknown	PubMed	-	37758169
Q9Y2H9	MAST1	L232P	L	232	P	-	not assigned	ambiguous/unknown	PubMed	-	38284444
Q6P0Q8	MAST2	D20V	D	20	V	-	germline	neutral	gnomAD	AF=0.00372005, allele-count=3032, n-homozygotes=39	32461654
Q6P0Q8	MAST2	P870L	P	870	L	-	germline	neutral	gnomAD	AF=0.00117717, allele-count=1718, n-homozygotes=30	32461654
Q6P0Q8	MAST2	R892Q	R	892	Q	-	germline	neutral	gnomAD	AF=0.00161480, allele-count=2332, n-homozygotes=3	32461654
Q6P0Q8	MAST2	R991Q	R	991	Q	-	germline	neutral	gnomAD	AF=0.00388616, allele-count=5376, n-homozygotes=20	32461654
Q6P0Q8	MAST2	V1137M	V	1137	M	-	germline	neutral	gnomAD	AF=0.00126488, allele-count=1849, n-homozygotes=2	32461654
Q6P0Q8	MAST2	R1335H	R	1335	H	-	germline	neutral	gnomAD	AF=0.00110200, allele-count=1611, n-homozygotes=4	32461654
Q6P0Q8	MAST2	A1413G	A	1413	G	-	germline	neutral	gnomAD	AF=0.00155627, allele-count=2275, n-homozygotes=3	32461654
Q6P0Q8	MAST2	G1468A	G	1468	A	-	germline	neutral	gnomAD	AF=0.0365046, allele-count=53349, n-homozygotes=2092	32461654
O60307	MAST3	T196M	T	196	M	-	germline	neutral	gnomAD	AF=0.0148898, allele-count=21319, n-homozygotes=410	32461654
O60307	MAST3	R203Q	R	203	Q	-	germline	neutral	gnomAD	AF=0.00281357, allele-count=4054, n-homozygotes=14	32461654
Q96GX5	MASTL	P620A	P	620	A	-	germline	neutral	gnomAD	AF=0.0643823, allele-count=94112, n-homozygotes=4142	32461654
Q96GX5	MASTL	V874I	V	874	I	-	germline	neutral	gnomAD	AF=0.00482647, allele-count=7055, n-homozygotes=26	32461654
Q14680	MELK	K26R	K	26	R	47	germline	neutral	gnomAD	AF=0.00597965, allele-count=8727, n-homozygotes=47	32461654
Q12866	MERTK	R20S	R	20	S	-	germline	neutral	gnomAD	AF=0.0414127, allele-count=59623, n-homozygotes=1569	32461654
Q12866	MERTK	A282T	A	282	T	-	germline	neutral	gnomAD	AF=0.00466896, allele-count=6825, n-homozygotes=452	32461654
Q12866	MERTK	E823Q	E	823	Q	701	germline	neutral	gnomAD	AF=0.00174706, allele-count=2554, n-homozygotes=6	32461654
P08581	MET	L1195V	L	1195	V	391	somatic	resistance	PubMed	-	36355693,36698189,37806493,37887535
P08581	MET	F1200I	F	1200	I	418	somatic	resistance	PubMed	-	36355693,37806493,38074469
P08581	MET	L1195F	L	1195	F	391	somatic	resistance	PubMed	inferred	36698189,38074469
P08581	MET	F1200L	F	1200	L	418	somatic	resistance	PubMed	-	36355693
P08581	MET	G1163R	G	1163	R	240	somatic	resistance	PubMed	-	38074469
P08581	MET	M1250T	M	1250	T	541	somatic	resistance	PubMed	-	36355693
P08581	MET	S1016A	S	1016	A	-	experimental	loss/decrease	PubMed	-	37188738
P08581	MET	Y1234E	Y	1234	E	507	experimental	activating/increase	PubMed	-	37806493
P08581	MET	D1228Y	D	1228	Y	491	not assigned	ambiguous/unknown	PubMed	-	37856922
P08581	MET	H1068L	H	1068	L	21	not assigned	ambiguous/unknown	PubMed	-	37965202
P08581	MET	I1084T	I	1084	T	37	not assigned	ambiguous/unknown	PubMed	-	37965202
P08581	MET	I56V	I	56	V	-	not assigned	ambiguous/unknown	PubMed	-	37680519
P08581	MET	L1112S	L	1112	S	98	not assigned	ambiguous/unknown	PubMed	-	37965202
P08581	MET	L1195V	L	1195	V	391	not assigned	ambiguous/unknown	PubMed	-	37887535
P08581	MET	Y1003F	Y	1003	F	-	not assigned	ambiguous/unknown	PubMed	-	37468447
P08581	MET	Y1235D	Y	1235	D	508	not assigned	ambiguous/unknown	PubMed	-	37806493
Q8N4C8	MINK1	E576D	E	576	D	-	germline	neutral	gnomAD	AF=0.00407940, allele-count=5645, n-homozygotes=15	32461654
Q8N4C8	MINK1	V771A	V	771	A	-	germline	neutral	gnomAD	AF=0.430402, allele-count=604147, n-homozygotes=141047	32461654
Q8N4C8	MINK1	E837D	E	837	D	-	germline	neutral	gnomAD	AF=0.00141852, allele-count=2044, n-homozygotes=4	32461654
Q8N4C8	MINK1	D967N	D	967	N	-	germline	neutral	gnomAD	AF=0.0203165, allele-count=29526, n-homozygotes=357	32461654
Q9HBH9	MKNK2	G422S	G	422	S	-	germline	neutral	gnomAD	AF=0.00129597, allele-count=1889, n-homozygotes=2	32461654
Q8NB16	MLKL	E19K	E	19	K	-	germline	neutral	gnomAD	AF=0.00268203, allele-count=3920, n-homozygotes=32	32461654
P00540	MOS	A105S	A	105	S	148	germline	neutral	gnomAD	AF=0.144696, allele-count=211508, n-homozygotes=17034	32461654
Q04912	MST1R	G1385V	G	1385	V	-	germline	neutral	gnomAD	AF=0.00162941, allele-count=2382, n-homozygotes=2	32461654
Q04912	MST1R	T957M	T	957	M	-	germline	neutral	gnomAD	AF=0.00360814, allele-count=5274, n-homozygotes=356	32461654
Q04912	MST1R	R910Q	R	910	Q	-	germline	neutral	gnomAD	AF=0.00240650, allele-count=3497, n-homozygotes=93	32461654
Q04912	MST1R	N778T	N	778	T	-	germline	neutral	gnomAD	AF=0.00136093, allele-count=1961, n-homozygotes=5	32461654
O15146	MUSK	A763T	A	763	T	530	not assigned	ambiguous/unknown	PubMed	-	37091828
O15146	MUSK	G107E	G	107	E	-	germline	neutral	gnomAD	AF=0.00326362, allele-count=4770, n-homozygotes=11	32461654
O15146	MUSK	I133T	I	133	T	-	germline	neutral	gnomAD	AF=0.00613420, allele-count=8511, n-homozygotes=38	32461654
O15146	MUSK	N664S	N	664	S	250	germline	neutral	gnomAD	AF=0.0112820, allele-count=16491, n-homozygotes=149	32461654
Q15746	MYLK	L1714P	L	1714	P	847	germline	neutral	gnomAD	AF=0.0547293, allele-count=79948, n-homozygotes=10186	32461654
Q15746	MYLK	W656C	W	656	C	-	germline	neutral	gnomAD	AF=0.00226974, allele-count=3318, n-homozygotes=5	32461654
Q15746	MYLK	P336L	P	336	L	-	germline	neutral	gnomAD	AF=0.00208979, allele-count=3055, n-homozygotes=12	32461654
Q9H1R3	MYLK2	G89D	G	89	D	-	germline	neutral	gnomAD	AF=0.00122280, allele-count=1786, n-homozygotes=31	32461654
Q9H1R3	MYLK2	P144A	P	144	A	-	germline	neutral	gnomAD	AF=0.0190003, allele-count=27617, n-homozygotes=337	32461654
Q32MK0	MYLK3	I654V	I	654	V	477	germline	neutral	gnomAD	AF=0.00354956, allele-count=5189, n-homozygotes=14	32461654
Q86YV6	MYLK4	Q373R	Q	373	R	864	germline	neutral	gnomAD	AF=0.00140691, allele-count=2055, n-homozygotes=4	32461654
Q8NEV4	MYO3A	H442N	H	442	N	-	not assigned	ambiguous/unknown	PubMed	-	38042485
Q8NEV4	MYO3A	A520V	A	520	V	-	germline	neutral	gnomAD	AF=0.00357036, allele-count=5213, n-homozygotes=13	32461654
Q8WXR4	MYO3B	G139R	G	139	R	380	germline	neutral	gnomAD	AF=0.00283296, allele-count=4141, n-homozygotes=11	32461654
Q8WXR4	MYO3B	D678E	D	678	E	-	germline	neutral	gnomAD	AF=0.00125321, allele-count=1832, n-homozygotes=34	32461654
Q8WXR4	MYO3B	R990C	R	990	C	-	germline	neutral	gnomAD	AF=0.00310353, allele-count=4537, n-homozygotes=16	32461654
Q96PY6	NEK1	M80I	M	80	I	233	not assigned	ambiguous/unknown	PubMed	-	36341712
Q96PY6	NEK1	A341T	A	341	T	-	germline	neutral	gnomAD	AF=0.00306436, allele-count=4217, n-homozygotes=8	32461654
Q96PY6	NEK1	R261H	R	261	H	856	germline	neutral	gnomAD	AF=0.00270739, allele-count=3955, n-homozygotes=10	32461654
Q6ZWH5	NEK10	P1090A	P	1090	A	-	germline	neutral	gnomAD	AF=0.00124823, allele-count=1824, n-homozygotes=41	32461654
Q6ZWH5	NEK10	I354V	I	354	V	-	germline	neutral	gnomAD	AF=0.00773785, allele-count=11301, n-homozygotes=106	32461654
Q6ZWH5	NEK10	R878K	R	878	K	-	germline	neutral	gnomAD	AF=0.00875636, allele-count=12794, n-homozygotes=1668	32461654
Q6ZWH5	NEK10	Y872C	Y	872	C	-	germline	neutral	gnomAD	AF=0.00152114, allele-count=2223, n-homozygotes=3	32461654
Q6ZWH5	NEK10	A770V	A	770	V	827	germline	neutral	gnomAD	AF=0.00971398, allele-count=14195, n-homozygotes=70	32461654
Q6ZWH5	NEK10	N401S	N	401	S	-	germline	neutral	gnomAD	AF=0.00950256, allele-count=13879, n-homozygotes=128	32461654
Q6ZWH5	NEK10	R365Q	R	365	Q	-	germline	neutral	gnomAD	AF=0.00655431, allele-count=9238, n-homozygotes=49	32461654
Q6P3R8	NEK5	V690I	V	690	I	-	germline	neutral	gnomAD	AF=0.00167599, allele-count=2450, n-homozygotes=12	32461654
Q6P3R8	NEK5	M601V	M	601	V	-	germline	neutral	gnomAD	AF=0.00360636, allele-count=5257, n-homozygotes=10	32461654
Q6P3R8	NEK5	D550Y	D	550	Y	-	germline	neutral	gnomAD	AF=0.00171505, allele-count=2419, n-homozygotes=53	32461654
Q6P3R8	NEK5	A547T	A	547	T	-	germline	neutral	gnomAD	AF=0.00342039, allele-count=813, n-homozygotes=19	32461654
Q6P3R8	NEK5	R474C	R	474	C	-	germline	neutral	gnomAD	AF=0.0116300, allele-count=16972, n-homozygotes=123	32461654
Q6P3R8	NEK5	Q464E	Q	464	E	-	germline	neutral	gnomAD	AF=0.00126941, allele-count=1693, n-homozygotes=34	32461654
Q6P3R8	NEK5	H233R	H	233	R	814	germline	neutral	gnomAD	AF=0.00129930, allele-count=1899, n-homozygotes=38	32461654
Q9HC98	NEK6	C285S	C	285	S	822	not assigned	ambiguous/unknown	PubMed	-	38117419
Q9HC98	NEK6	I134N	I	134	N	253	not assigned	ambiguous/unknown	PubMed	-	38117419
Q9HC98	NEK6	I51M	I	51	M	37	not assigned	ambiguous/unknown	PubMed	-	38117419
Q9HC98	NEK6	L237R	L	237	R	595	not assigned	ambiguous/unknown	PubMed	-	38117419
Q9HC98	NEK6	R171Q	R	171	Q	424	not assigned	ambiguous/unknown	PubMed	-	38117419
Q9HC98	NEK6	V186G	V	186	G	475	not assigned	ambiguous/unknown	PubMed	-	38117419
Q9HC98	NEK6	V76A	V	76	A	98	not assigned	ambiguous/unknown	PubMed	-	38117419
Q9HC98	NEK6	Y152D	Y	152	D	377	not assigned	ambiguous/unknown	PubMed	-	38117419
Q9HC98	NEK6	N16K	N	16	K	2	germline	neutral	gnomAD	AF=0.00101085, allele-count=1470, n-homozygotes=3	32461654
Q8TDX7	NEK7	M8L	M	8	L	4	germline	neutral	gnomAD	AF=0.00101344, allele-count=1474, n-homozygotes=23	32461654
Q86SG6	NEK8	I150M	I	150	M	482	not assigned	ambiguous/unknown	PubMed	-	37598857
Q86SG6	NEK8	K157Q	K	157	Q	503	not assigned	ambiguous/unknown	PubMed	-	37598857
Q86SG6	NEK8	R45W	R	45	W	122	not assigned	ambiguous/unknown	PubMed	-	37598857
Q8TD19	NEK9	L962F	L	962	F	-	germline	neutral	gnomAD	AF=0.00140437, allele-count=2053, n-homozygotes=15	32461654
Q8TD19	NEK9	G755S	G	755	S	-	germline	neutral	gnomAD	AF=0.0132066, allele-count=19156, n-homozygotes=191	32461654
Q8TD19	NEK9	P751L	P	751	L	-	germline	neutral	gnomAD	AF=0.0144080, allele-count=20777, n-homozygotes=168	32461654
Q8TD19	NEK9	D84N	D	84	N	102	germline	neutral	gnomAD	AF=0.00358353, allele-count=5238, n-homozygotes=22	32461654
Q8TD19	NEK9	G43A	G	43	A	19	germline	neutral	gnomAD	AF=0.00157585, allele-count=2173, n-homozygotes=59	32461654
Q8IY84	NIM1K	D23N	D	23	N	-	germline	neutral	gnomAD	AF=0.00141881, allele-count=2074, n-homozygotes=7	32461654
Q8IY84	NIM1K	M320I	M	320	I	847	germline	neutral	gnomAD	AF=0.00260632, allele-count=3810, n-homozygotes=7	32461654
P16066	NPR1	P2L	P	2	L	-	germline	neutral	gnomAD	AF=0.00507120, allele-count=6469, n-homozygotes=200	32461654
P16066	NPR1	R6S	R	6	S	-	germline	neutral	gnomAD	AF=0.00489442, allele-count=6277, n-homozygotes=189	32461654
P16066	NPR1	M341I	M	341	I	-	germline	neutral	gnomAD	AF=0.00341985, allele-count=4975, n-homozygotes=165	32461654
P16066	NPR1	R439C	R	439	C	-	germline	neutral	gnomAD	AF=0.00104318, allele-count=1525, n-homozygotes=5	32461654
P20594	NPR2	G123V	G	123	V	-	germline	loss/decrease	PubMed	-	38078000
P20594	NPR2	L314R	L	314	R	-	germline	loss/decrease	PubMed	-	38078000
P20594	NPR2	L51P	L	51	P	-	germline	loss/decrease	PubMed	-	38078000
P20594	NPR2	R388Q	R	388	Q	-	germline	loss/decrease	PubMed	-	38078000
P20594	NPR2	R932C	R	932	C	-	germline	loss/decrease	PubMed	-	38078000
P20594	NPR2	L527F	L	527	F	18	not assigned	ambiguous/unknown	PubMed	-	37501190
P20594	NPR2	R989Q	R	989	Q	-	not assigned	ambiguous/unknown	PubMed	-	36322898
Q7Z2Y5	NRK	V358M	V	358	M	-	germline	neutral	gnomAD	AF=0.226005, allele-count=215236, n-homozygotes=19925	32461654
Q7Z2Y5	NRK	P789S	P	789	S	-	germline	neutral	gnomAD	AF=0.00533953, allele-count=5530, n-homozygotes=33	32461654
Q7Z2Y5	NRK	D971G	D	971	G	-	germline	neutral	gnomAD	AF=0.00481892, allele-count=4961, n-homozygotes=13	32461654
Q7Z2Y5	NRK	A993E	A	993	E	-	germline	neutral	gnomAD	AF=0.0123147, allele-count=13223, n-homozygotes=1852	32461654
Q7Z2Y5	NRK	N1131S	N	1131	S	-	germline	neutral	gnomAD	AF=0.00281394, allele-count=3032, n-homozygotes=2	32461654
P04629	NTRK1	G595R	G	595	R	240	not assigned	ambiguous/unknown	PubMed	-	37676745
P04629	NTRK1	G667C	G	667	C	478	not assigned	ambiguous/unknown	PubMed	-	37676745
P04629	NTRK1	R6W	R	6	W	-	germline	neutral	gnomAD	AF=0.00442687, allele-count=5946, n-homozygotes=13	32461654
P04629	NTRK1	Q289K	Q	289	K	-	germline	neutral	gnomAD	AF=0.00136082, allele-count=1985, n-homozygotes=2	32461654
Q16620	NTRK2	G408R	G	408	R	-	not assigned	ambiguous/unknown	PubMed	-	36775011
Q16620	NTRK2	S2L	S	2	L	-	not assigned	ambiguous/unknown	PubMed	-	38134118
Q16620	NTRK2	S167Y	S	167	Y	-	germline	neutral	gnomAD	AF=0.00155697, allele-count=2276, n-homozygotes=2	32461654
Q16620	NTRK2	P204H	P	204	H	-	germline	neutral	gnomAD	AF=0.00165139, allele-count=2414, n-homozygotes=3	32461654
Q16288	NTRK3	G623R	G	623	R	240	somatic	resistance	PubMed	-	36703785,36946696,38252063,38438731
Q16288	NTRK3	G623E	G	623	E	240	somatic	resistance	PubMed	-	36703785,37338765
Q16288	NTRK3	F617L	F	617	L	233	somatic	resistance	PubMed	-	36997313
Q16288	NTRK3	R582W	R	582	W	143	not assigned	ambiguous/unknown	PubMed	-	37338765
O60285	NUAK1	R595L	R	595	L	-	germline	neutral	gnomAD	AF=0.00177717, allele-count=2598, n-homozygotes=5	32461654
O60285	NUAK1	P543R	P	543	R	-	germline	neutral	gnomAD	AF=0.230937, allele-count=337597, n-homozygotes=40260	32461654
Q13153	PAK1	L470Q	L	470	Q	655	not assigned	ambiguous/unknown	PubMed	-	36905087
Q13153	PAK1	M143K	M	143	K	-	not assigned	ambiguous/unknown	PubMed	-	37820543
Q13153	PAK1	M143T	M	143	T	-	not assigned	ambiguous/unknown	PubMed	-	37820543
Q13153	PAK1	M143V	M	143	V	-	not assigned	ambiguous/unknown	PubMed	-	37820543
Q13153	PAK1	T84R	T	84	R	-	not assigned	ambiguous/unknown	PubMed	-	36624491
O96013	PAK4	I417T	I	417	T	371	tumor-predisposition	activating/increase	PubMed	-	38411500
O96013	PAK4	P108L	P	108	L	-	germline	neutral	gnomAD	AF=0.00180275, allele-count=2518, n-homozygotes=37	32461654
O96013	PAK4	R555G	R	555	G	825	germline	neutral	gnomAD	AF=0.00235402, allele-count=3418, n-homozygotes=22	32461654
Q9P286	PAK5	D665N	D	665	N	697	germline	neutral	gnomAD	AF=0.00218698, allele-count=3197, n-homozygotes=4	32461654
Q9P286	PAK5	S511N	S	511	N	184	germline	neutral	gnomAD	AF=0.317086, allele-count=462285, n-homozygotes=80751	32461654
Q9P286	PAK5	R335P	R	335	P	-	germline	neutral	gnomAD	AF=0.100556, allele-count=146830, n-homozygotes=8948	32461654
Q9P286	PAK5	G118D	G	118	D	-	germline	neutral	gnomAD	AF=0.00757034, allele-count=11067, n-homozygotes=536	32461654
Q9NQU5	PAK6	R191H	R	191	H	-	germline	neutral	gnomAD	AF=0.00157971, allele-count=2302, n-homozygotes=68	32461654
Q9NQU5	PAK6	R262Q	R	262	Q	-	germline	neutral	gnomAD	AF=0.0137468, allele-count=20082, n-homozygotes=217	32461654
Q9NQU5	PAK6	R334C	R	334	C	-	germline	neutral	gnomAD	AF=0.00176412, allele-count=2578, n-homozygotes=4	32461654
Q9NQU5	PAK6	A376V	A	376	V	-	germline	neutral	gnomAD	AF=0.00247493, allele-count=3617, n-homozygotes=5	32461654
Q9NQU5	PAK6	R425Q	R	425	Q	53	germline	neutral	gnomAD	AF=0.00122805, allele-count=1789, n-homozygotes=2	32461654
Q96RG2	PASK	R1319H	R	1319	H	-	germline	neutral	gnomAD	AF=0.00113621, allele-count=1661, n-homozygotes=24	32461654
Q96RG2	PASK	F1266C	F	1266	C	867	germline	neutral	gnomAD	AF=0.126750, allele-count=185074, n-homozygotes=18138	32461654
Q96RG2	PASK	T1195M	T	1195	M	597	germline	neutral	gnomAD	AF=0.00112416, allele-count=1643, n-homozygotes=3	32461654
Q96RG2	PASK	L1051V	L	1051	V	148	germline	neutral	gnomAD	AF=0.00316544, allele-count=4627, n-homozygotes=9	32461654
Q96RG2	PASK	Y899H	Y	899	H	-	germline	neutral	gnomAD	AF=0.00164321, allele-count=2402, n-homozygotes=67	32461654
Q96RG2	PASK	T850M	T	850	M	-	germline	neutral	gnomAD	AF=0.00263905, allele-count=3858, n-homozygotes=115	32461654
Q96RG2	PASK	G782R	G	782	R	-	germline	neutral	gnomAD	AF=0.00123349, allele-count=1803, n-homozygotes=32	32461654
Q96RG2	PASK	T763M	T	763	M	-	germline	neutral	gnomAD	AF=0.00105895, allele-count=1548, n-homozygotes=3	32461654
Q96RG2	PASK	R455W	R	455	W	-	germline	neutral	gnomAD	AF=0.00125278, allele-count=1831, n-homozygotes=29	32461654
Q96RG2	PASK	T136A	T	136	A	-	germline	neutral	gnomAD	AF=0.00187970, allele-count=2746, n-homozygotes=29	32461654
Q96KB5	PBK	K87M	K	87	M	151	germline	neutral	gnomAD	AF=0.00195021, allele-count=2815, n-homozygotes=34	32461654
P16234	PDGFRA	D842N	D	842	N	491	somatic	activating/increase	PubMed	-	37725576
P16234	PDGFRA	G680R	G	680	R	240	not assigned	ambiguous/unknown	PubMed	-	36802986,38004483
P16234	PDGFRA	L221F	L	221	F	-	germline	neutral	gnomAD	AF=0.00458938, allele-count=6706, n-homozygotes=16	32461654
P16234	PDGFRA	R340Q	R	340	Q	-	germline	neutral	gnomAD	AF=0.00158366, allele-count=2315, n-homozygotes=52	32461654
P09619	PDGFRB	N666K	N	666	K	180	somatic	activating/increase	PubMed	inferred	36788091,36788105
P09619	PDGFRB	N666S	N	666	S	180	germline	activating/increase	PubMed	gain-of-function	37221131
P09619	PDGFRB	S548Y	S	548	Y	-	germline	activating/increase	PubMed	inferred by drug response	37934158
P09619	PDGFRB	D850Y	D	850	Y	491	not assigned	ambiguous/unknown	PubMed	-	36788091
P09619	PDGFRB	G576S	G	576	S	6	not assigned	ambiguous/unknown	PubMed	-	36788105
P09619	PDGFRB	H657L	H	657	L	156	not assigned	ambiguous/unknown	PubMed	-	36788105
P09619	PDGFRB	M655I	M	655	I	154	not assigned	ambiguous/unknown	PubMed	-	36788105
P09619	PDGFRB	R561C	R	561	C	-	not assigned	ambiguous/unknown	PubMed	-	37568122
P09619	PDGFRB	R919Q	R	919	Q	661	not assigned	ambiguous/unknown	PubMed	-	37780723
P09619	PDGFRB	S574F	S	574	F	4	not assigned	ambiguous/unknown	PubMed	-	36788105
P09619	PDGFRB	Y562C	Y	562	C	-	not assigned	ambiguous/unknown	PubMed	-	36788105
P09619	PDGFRB	A1096V	A	1096	V	-	germline	neutral	gnomAD	AF=0.00306420, allele-count=4471, n-homozygotes=6	32461654
P09619	PDGFRB	R502Q	R	502	Q	-	germline	neutral	gnomAD	AF=0.00209818, allele-count=3067, n-homozygotes=5	32461654
P09619	PDGFRB	R502W	R	502	W	-	germline	neutral	gnomAD	AF=0.00113290, allele-count=1656, n-homozygotes=12	32461654
P09619	PDGFRB	T464M	T	464	M	-	germline	neutral	gnomAD	AF=0.00258560, allele-count=3779, n-homozygotes=123	32461654
P09619	PDGFRB	R459H	R	459	H	-	germline	neutral	gnomAD	AF=0.00116617, allele-count=1704, n-homozygotes=19	32461654
P09619	PDGFRB	V316M	V	316	M	-	germline	neutral	gnomAD	AF=0.00334433, allele-count=4709, n-homozygotes=20	32461654
P09619	PDGFRB	I194T	I	194	T	-	germline	neutral	gnomAD	AF=0.00204057, allele-count=2983, n-homozygotes=8	32461654
Q16816	PHKG1	A47T	A	47	T	93	germline	neutral	gnomAD	AF=0.00256992, allele-count=3756, n-homozygotes=9	32461654
Q99570	PIK3R4	A471S	A	471	S	-	germline	neutral	gnomAD	AF=0.00237422, allele-count=3470, n-homozygotes=5	32461654
Q99570	PIK3R4	V448I	V	448	I	-	germline	neutral	gnomAD	AF=0.00127246, allele-count=1860, n-homozygotes=33	32461654
P11309	PIM1	E124Q	E	124	Q	238	germline	neutral	gnomAD	AF=0.00270214, allele-count=3950, n-homozygotes=9	32461654
P11309	PIM1	P311T	P	311	T	873	germline	neutral	gnomAD	AF=0.00197181, allele-count=2880, n-homozygotes=51	32461654
Q86V86	PIM3	P313S	P	313	S	872	germline	neutral	gnomAD	AF=0.00132920, allele-count=1939, n-homozygotes=66	32461654
Q9BXM7	PINK1	G409V	G	409	V	535	germline	loss/decrease	PubMed	-	37865376
Q9BXM7	PINK1	G411A	G	411	A	538	experimental	activating/increase	PubMed	-	36469690
Q9BXM7	PINK1	M318G	M	318	G	233	somatic	resistance	PubMed	-	38241364
Q9BXM7	PINK1	W403A	W	403	A	526	not assigned	ambiguous/unknown	PubMed	-	36941054
Q9BXM7	PINK1	A339T	A	339	T	371	germline	neutral	gnomAD	AF=0.00139962, allele-count=2046, n-homozygotes=3	32461654
Q504Y2	PKDCC	P102A	P	102	A	-	germline	neutral	gnomAD	AF=0.00688274, allele-count=6465, n-homozygotes=21	32461654
Q504Y2	PKDCC	S109P	S	109	P	-	germline	neutral	gnomAD	AF=0.136500, allele-count=143987, n-homozygotes=11328	32461654
Q504Y2	PKDCC	A237T	A	237	T	238	germline	neutral	gnomAD	AF=0.00623239, allele-count=9109, n-homozygotes=37	32461654
Q504Y2	PKDCC	R300H	R	300	H	485	germline	neutral	gnomAD	AF=0.0121664, allele-count=17758, n-homozygotes=152	32461654
Q16512	PKN1	L555I	L	555	I	-	germline	neutral	gnomAD	AF=0.00118752, allele-count=1736, n-homozygotes=15	32461654
Q16512	PKN1	I718V	I	718	V	372	germline	neutral	gnomAD	AF=0.0794900, allele-count=115945, n-homozygotes=7079	32461654
Q6P5Z2	PKN3	A180E	A	180	E	-	germline	neutral	gnomAD	AF=0.00447532, allele-count=6542, n-homozygotes=19	32461654
Q6P5Z2	PKN3	E351K	E	351	K	-	germline	neutral	gnomAD	AF=0.00128821, allele-count=1883, n-homozygotes=29	32461654
Q6P5Z2	PKN3	G450S	G	450	S	-	germline	neutral	gnomAD	AF=0.00171714, allele-count=2510, n-homozygotes=73	32461654
Q6P5Z2	PKN3	P553T	P	553	T	22	germline	neutral	gnomAD	AF=0.00200034, allele-count=2924, n-homozygotes=10	32461654
P53350	PLK1	K178R	K	178	R	428	experimental	sumoylation	PubMed	-	36317691
P53350	PLK1	K191R	K	191	R	476	experimental	sumoylation	PubMed	-	36317691
P53350	PLK1	T291A	T	291	A	828	experimental	o-glcnac site	PubMed	-	36626982
P53350	PLK1	T291N	T	291	N	828	experimental	o-glcnac site	PubMed	-	36626982
Q9NYY3	PLK2	H60D	H	60	D	7	germline	neutral	gnomAD	AF=0.00146873, allele-count=2138, n-homozygotes=7	32461654
O00444	PLK4	G6E	G	6	E	24	germline	neutral	gnomAD	AF=0.00133542, allele-count=1952, n-homozygotes=3	32461654
O00444	PLK4	P317L	P	317	L	-	germline	neutral	gnomAD	AF=0.00340404, allele-count=4975, n-homozygotes=15	32461654
P17612	PRKACA	G137R	G	137	R	357	not assigned	ambiguous/unknown	PubMed	-	38357848
P17252	PRKCA	D463H	D	463	H	426	not assigned	ambiguous/unknown	PubMed	-	37675487
Q05655	PRKCD	G510S	G	510	S	535	germline	loss/decrease	PubMed	-	36961448
Q02156	PRKCE	R510Q	R	510	Q	372	germline	neutral	gnomAD	AF=0.00543803, allele-count=7871, n-homozygotes=31	32461654
P05129	PRKCG	C142S	C	142	S	-	not assigned	ambiguous/unknown	PubMed	-	38072404
P05129	PRKCG	G411A	G	411	A	168	not assigned	ambiguous/unknown	PubMed	-	36968593
Q05513	PRKCZ	S148R	S	148	R	-	germline	neutral	gnomAD	AF=0.00118456, allele-count=1659, n-homozygotes=20	32461654
Q15139	PRKD1	E710D	E	710	D	430	not assigned	ambiguous/unknown	PubMed	-	37595638
Q15139	PRKD1	L7P	L	7	P	-	germline	neutral	gnomAD	AF=0.00881935, allele-count=9413, n-homozygotes=50	32461654
Q9BZL6	PRKD2	E873K	E	873	K	-	germline	neutral	gnomAD	AF=0.00119051, allele-count=1739, n-homozygotes=3	32461654
Q9BZL6	PRKD2	A835V	A	835	V	880	germline	neutral	gnomAD	AF=0.00132450, allele-count=1927, n-homozygotes=3	32461654
Q9BZL6	PRKD2	P486L	P	486	L	-	germline	neutral	gnomAD	AF=0.00107508, allele-count=1571, n-homozygotes=2	32461654
Q9BZL6	PRKD2	V324M	V	324	M	-	germline	neutral	gnomAD	AF=0.00810063, allele-count=11842, n-homozygotes=63	32461654
Q9BZL6	PRKD2	A191V	A	191	V	-	germline	neutral	gnomAD	AF=0.00101867, allele-count=1489, n-homozygotes=4	32461654
O94806	PRKD3	R297H	R	297	H	-	germline	neutral	gnomAD	AF=0.00275908, allele-count=4028, n-homozygotes=5	32461654
O94806	PRKD3	K289R	K	289	R	-	germline	neutral	gnomAD	AF=0.00291723, allele-count=4264, n-homozygotes=12	32461654
Q13237	PRKG2	V470G	V	470	G	51	not assigned	ambiguous/unknown	PubMed	-	37789084
Q13237	PRKG2	M180I	M	180	I	-	germline	neutral	gnomAD	AF=0.00288250, allele-count=4211, n-homozygotes=5	32461654
Q13523	PRPF4B	R286H	R	286	H	-	germline	neutral	gnomAD	AF=0.00282876, allele-count=4135, n-homozygotes=25	32461654
Q14289	PTK2B	T264N	T	264	N	-	germline	neutral	gnomAD	AF=0.00427719, allele-count=6252, n-homozygotes=20	32461654
Q14289	PTK2B	G414V	G	414	V	19	germline	neutral	gnomAD	AF=0.00952259, allele-count=13919, n-homozygotes=87	32461654
Q14289	PTK2B	A864V	A	864	V	-	germline	neutral	gnomAD	AF=0.00175461, allele-count=2565, n-homozygotes=4	32461654
Q13308	PTK7	M746L	M	746	L	-	germline	neutral	gnomAD	AF=0.00166454, allele-count=2430, n-homozygotes=6	32461654
P04049	RAF1	R231Q	R	231	Q	-	somatic	activating/increase	PubMed	gain-of-function	37256945
P04049	RAF1	T543M	T	543	M	601	germline	loss/decrease	PubMed	-	37066513
P07949	RET	G810C	G	810	C	240	somatic	resistance	PubMed	-	36308779,36576611,36905915,37070927
P07949	RET	C630Y	C	630	Y	-	somatic	activating/increase	PubMed	inferred by drug response	37922409
P07949	RET	G810D	G	810	D	240	somatic	resistance	PubMed	-	37070927
P07949	RET	G810R	G	810	R	240	somatic	resistance	PubMed	-	36308779
P07949	RET	G810S	G	810	S	240	somatic	resistance	PubMed	-	36996322
P07949	RET	S811F	S	811	F	241	germline	loss/decrease	PubMed	-	36521661
P07949	RET	M918T	M	918	T	541	not assigned	ambiguous/unknown	PubMed	-	36456885,36704524,37425604,37466466,37835559,37842841,37846174,37908885,37979019,38047536,38127829,38312000,38378752
P07949	RET	C634R	C	634	R	-	not assigned	ambiguous/unknown	PubMed	-	36456885,37335636,37535881,37779971,37900832,38027168,38407483
P07949	RET	V804M	V	804	M	233	not assigned	ambiguous/unknown	PubMed	-	36889173,36905915,37070927,38339173,38339246
P07949	RET	C634Y	C	634	Y	-	not assigned	ambiguous/unknown	PubMed	-	36936415,37921725,38132167
P07949	RET	C634G	C	634	G	-	not assigned	ambiguous/unknown	PubMed	-	36900098,38407483
P07949	RET	L790F	L	790	F	182	not assigned	ambiguous/unknown	PubMed	-	36456885,37466466
P07949	RET	R912W	R	912	W	530	not assigned	ambiguous/unknown	PubMed	-	37846174,38087091
P07949	RET	S891A	S	891	A	478	not assigned	ambiguous/unknown	PubMed	-	36456885,37942886
P07949	RET	V804L	V	804	L	233	not assigned	ambiguous/unknown	PubMed	-	36456885,37979019
P07949	RET	C611Y	C	611	Y	-	not assigned	ambiguous/unknown	PubMed	-	37046785
P07949	RET	C618R	C	618	R	-	not assigned	ambiguous/unknown	PubMed	-	38027168
P07949	RET	C620R	C	620	R	-	not assigned	ambiguous/unknown	PubMed	-	38253735
P07949	RET	E768D	E	768	D	121	not assigned	ambiguous/unknown	PubMed	-	36456885
P07949	RET	G810V	G	810	V	240	not assigned	ambiguous/unknown	PubMed	-	37070927
P07949	RET	T244I	T	244	I	-	not assigned	ambiguous/unknown	PubMed	-	36407031
P07949	RET	L56M	L	56	M	-	germline	neutral	gnomAD	AF=0.00499724, allele-count=7304, n-homozygotes=25	32461654
P07949	RET	Y791F	Y	791	F	183	germline	neutral	gnomAD	AF=0.00137866, allele-count=2015, n-homozygotes=3	32461654
Q13546	RIPK1	D138N	D	138	N	426	experimental	loss/decrease	PubMed	-	36532075,37789765
P57078	RIPK4	G3S	G	3	S	8	germline	neutral	gnomAD	AF=0.00120002, allele-count=1705, n-homozygotes=21	32461654
O75116	ROCK2	K1007R	K	1007	R	-	germline	loss/decrease	PubMed	sumoylation variant	37393345
O75116	ROCK2	I41V	I	41	V	-	germline	neutral	gnomAD	AF=0.00201954, allele-count=2904, n-homozygotes=6	32461654
Q01974	ROR2	P799S	P	799	S	-	germline	neutral	gnomAD	AF=0.00256289, allele-count=3739, n-homozygotes=19	32461654
Q01974	ROR2	S762L	S	762	L	866	germline	neutral	gnomAD	AF=0.00384410, allele-count=5616, n-homozygotes=12	32461654
Q01974	ROR2	P548S	P	548	S	219	germline	neutral	gnomAD	AF=0.00115072, allele-count=1669, n-homozygotes=33	32461654
P08922	ROS1	G2032R	G	2032	R	240	somatic	resistance	PubMed	-	36511802,37349867,37973688,38070596,38089732,38197815,38293020,38339278,38416709,38433235
P08922	ROS1	L2026M	L	2026	M	233	somatic	resistance	PubMed	-	38148635,38293020,38433235
P08922	ROS1	L2086F	L	2086	F	433	somatic	resistance	PubMed	-	37291202,38070596,38293020
P08922	ROS1	D2033N	D	2033	N	241	somatic	resistance	PubMed	-	36265718,38339278
P08922	ROS1	F2004V	F	2004	V	159	somatic	resistance	PubMed	-	37291202,38047274
P08922	ROS1	D1988N	D	1988	N	119	somatic	resistance	PubMed	-	38416709
P08922	ROS1	D2113N	D	2113	N	504	somatic	resistance	PubMed	inferred by drug response	37587872
P08922	ROS1	G1957A	G	1957	A	43	somatic	resistance	PubMed	-	38416709
P08922	ROS1	L1982V	L	1982	V	98	somatic	resistance	PubMed	-	38416709
P08922	ROS1	L2010M	L	2010	M	179	somatic	resistance	PubMed	-	38416709
P08922	ROS1	S1986F	S	1986	F	114	somatic	resistance	PubMed	-	36265718
P08922	ROS1	S1986Y	S	1986	Y	114	somatic	resistance	PubMed	-	38433235
P08922	ROS1	F2004C	F	2004	C	159	not assigned	ambiguous/unknown	PubMed	-	38293020
P08922	ROS1	P2130A	P	2130	A	543	not assigned	ambiguous/unknown	PubMed	-	37867524
P08922	ROS1	N2234K	N	2234	K	869	germline	neutral	gnomAD	AF=0.00612931, allele-count=8684, n-homozygotes=197	32461654
P08922	ROS1	S648F	S	648	F	-	germline	neutral	gnomAD	AF=0.00483561, allele-count=7069, n-homozygotes=18	32461654
Q15418	RPS6KA1	P11A	P	11	A	-	germline	neutral	gnomAD	AF=0.00258632, allele-count=3316, n-homozygotes=30	32461654
Q15349	RPS6KA2	H371Y	H	371	Y	-	germline	neutral	gnomAD	AF=0.00306466, allele-count=4480, n-homozygotes=11	32461654
P51812	RPS6KA3	R723H	R	723	H	-	germline	neutral	gnomAD	AF=0.00128549, allele-count=1410, n-homozygotes=3	32461654
O75676	RPS6KA4	R427H	R	427	H	48	germline	neutral	gnomAD	AF=0.00164257, allele-count=2365, n-homozygotes=4	32461654
O75582	RPS6KA5	D787N	D	787	N	-	germline	neutral	gnomAD	AF=0.00181081, allele-count=2647, n-homozygotes=5	32461654
O75582	RPS6KA5	A16S	A	16	S	-	germline	neutral	gnomAD	AF=0.00611906, allele-count=8301, n-homozygotes=31	32461654
Q9UBS0	RPS6KB2	R120W	R	120	W	150	germline	neutral	gnomAD	AF=0.00294702, allele-count=4308, n-homozygotes=7	32461654
Q9UBS0	RPS6KB2	P267L	P	267	L	608	germline	neutral	gnomAD	AF=0.0473941, allele-count=69181, n-homozygotes=1877	32461654
Q96S38	RPS6KC1	P561R	P	561	R	-	not assigned	ambiguous/unknown	PubMed	-	32461654
Q96S38	RPS6KC1	A261T	A	261	T	-	germline	neutral	gnomAD	AF=0.00150595, allele-count=2197, n-homozygotes=6	32461654
Q96S38	RPS6KC1	A407V	A	407	V	-	germline	neutral	gnomAD	AF=0.00431798, allele-count=6311, n-homozygotes=18	32461654
Q9Y6S9	RPS6KL1	A277T	A	277	T	-	germline	neutral	gnomAD	AF=0.00287932, allele-count=4209, n-homozygotes=38	32461654
Q9Y6S9	RPS6KL1	S241R	S	241	R	-	germline	neutral	gnomAD	AF=0.00165786, allele-count=2393, n-homozygotes=7	32461654
Q96LW2	RSKR	C340R	C	340	R	824	germline	neutral	gnomAD	AF=0.00503315, allele-count=6965, n-homozygotes=16	32461654
Q96LW2	RSKR	G249S	G	249	S	481	germline	neutral	gnomAD	AF=0.0292199, allele-count=41738, n-homozygotes=712	32461654
Q96LW2	RSKR	S173G	S	173	G	185	germline	neutral	gnomAD	AF=0.00188935, allele-count=2762, n-homozygotes=18	32461654
Q96LW2	RSKR	H65L	H	65	L	-	germline	neutral	gnomAD	AF=0.0140681, allele-count=20566, n-homozygotes=193	32461654
Q96LW2	RSKR	A3T	A	3	T	-	germline	neutral	gnomAD	AF=0.00195190, allele-count=2852, n-homozygotes=83	32461654
Q52WX2	SBK1	R12H	R	12	H	-	germline	neutral	gnomAD	AF=0.00440914, allele-count=6445, n-homozygotes=21	32461654
P0C263	SBK2	G102D	G	102	D	145	germline	neutral	gnomAD	AF=0.00204704, allele-count=2991, n-homozygotes=3	32461654
Q96KG9	SCYL1	T627M	T	627	M	-	germline	neutral	gnomAD	AF=0.00315990, allele-count=4618, n-homozygotes=53	32461654
Q96KG9	SCYL1	D645N	D	645	N	-	germline	neutral	gnomAD	AF=0.00138249, allele-count=2021, n-homozygotes=33	32461654
Q96KG9	SCYL1	D682N	D	682	N	-	germline	neutral	gnomAD	AF=0.00107611, allele-count=1570, n-homozygotes=7	32461654
Q96KG9	SCYL1	R720W	R	720	W	-	germline	neutral	gnomAD	AF=0.00349817, allele-count=5083, n-homozygotes=14	32461654
Q6P3W7	SCYL2	E663K	E	663	K	-	germline	neutral	gnomAD	AF=0.00960360, allele-count=14030, n-homozygotes=104	32461654
Q6P3W7	SCYL2	T716S	T	716	S	-	germline	neutral	gnomAD	AF=0.00243003, allele-count=3477, n-homozygotes=113	32461654
Q6P3W7	SCYL2	T745A	T	745	A	-	germline	neutral	gnomAD	AF=0.00149767, allele-count=2189, n-homozygotes=5	32461654
Q6P3W7	SCYL2	V888M	V	888	M	-	germline	neutral	gnomAD	AF=0.00415712, allele-count=6077, n-homozygotes=20	32461654
Q9HBY8	SGK2	H289Y	H	289	Y	849	germline	neutral	gnomAD	AF=0.00157299, allele-count=2298, n-homozygotes=6	32461654
Q96BR1	SGK3	I446S	I	446	S	879	germline	neutral	gnomAD	AF=0.00126333, allele-count=1840, n-homozygotes=4	32461654
P57059	SIK1	G735D	G	735	D	-	germline	neutral	gnomAD	AF=0.00130752, allele-count=62, n-homozygotes=26	32461654
P57059	SIK1	P358A	P	358	A	-	germline	neutral	gnomAD	AF=0.0218959, allele-count=1178, n-homozygotes=488	32461654
Q9H0K1	SIK2	P825L	P	825	L	-	not assigned	ambiguous/unknown	PubMed	-	37219665
Q9H0K1	SIK2	P828H	P	828	H	-	not assigned	ambiguous/unknown	PubMed	-	37219665
Q9H0K1	SIK2	P831Q	P	831	Q	-	not assigned	ambiguous/unknown	PubMed	-	37219665
Q9H0K1	SIK2	T221A	T	221	A	649	not assigned	ambiguous/unknown	PubMed	-	37477881
Q9H0K1	SIK2	T458I	T	458	I	-	germline	neutral	gnomAD	AF=0.00222999, allele-count=3260, n-homozygotes=7	32461654
Q9Y2K2	SIK3	P1136R	P	1136	R	-	germline	neutral	gnomAD	AF=0.179641, allele-count=262609, n-homozygotes=24501	32461654
Q9Y2K2	SIK3	A1050T	A	1050	T	-	germline	neutral	gnomAD	AF=0.00217663, allele-count=3182, n-homozygotes=71	32461654
Q9Y2K2	SIK3	R1042C	R	1042	C	-	germline	neutral	gnomAD	AF=0.00279774, allele-count=4090, n-homozygotes=133	32461654
Q9Y2K2	SIK3	Y959C	Y	959	C	-	germline	neutral	gnomAD	AF=0.00442548, allele-count=6439, n-homozygotes=11	32461654
Q9Y2K2	SIK3	G19E	G	19	E	-	germline	neutral	gnomAD	AF=0.00642268, allele-count=6507, n-homozygotes=23	32461654
Q9H2G2	SLK	N748H	N	748	H	-	germline	neutral	gnomAD	AF=0.00133203, allele-count=1947, n-homozygotes=14	32461654
Q9H2G2	SLK	M1121V	M	1121	V	-	germline	neutral	gnomAD	AF=0.00138827, allele-count=2029, n-homozygotes=2	32461654
Q9NRH2	SNRK	G703S	G	703	S	-	germline	neutral	gnomAD	AF=0.00235115, allele-count=3421, n-homozygotes=7	32461654
P12931	SRC	P302W	P	302	W	107	not assigned	ambiguous/unknown	PubMed	-	37344519
P12931	SRC	S348A	S	348	A	241	not assigned	ambiguous/unknown	PubMed	-	37505094
Q9H3Y6	SRMS	V222M	V	222	M	21	germline	neutral	gnomAD	AF=0.00571963, allele-count=7888, n-homozygotes=40	32461654
Q9H3Y6	SRMS	G75R	G	75	R	-	germline	neutral	gnomAD	AF=0.00202282, allele-count=2950, n-homozygotes=5	32461654
Q9UPE1	SRPK3	E529K	E	529	K	796	not assigned	ambiguous/unknown	PubMed	-	36993381
Q9UPE1	SRPK3	H159D	H	159	D	219	not assigned	ambiguous/unknown	PubMed	-	36993381
Q9UPE1	SRPK3	T458N	T	458	N	601	not assigned	ambiguous/unknown	PubMed	-	36993381
O94804	STK10	N603T	N	603	T	-	germline	neutral	gnomAD	AF=0.00257809, allele-count=3767, n-homozygotes=10	32461654
O94804	STK10	P394A	P	394	A	-	germline	neutral	gnomAD	AF=0.00263316, allele-count=3836, n-homozygotes=117	32461654
Q15831	STK11	F354L	F	354	L	-	not assigned	ambiguous/unknown	PubMed	-	37226494,37900785
Q15831	STK11	F354L	F	354	L	-	germline	neutral	gnomAD	AF=0.00522294, allele-count=7623, n-homozygotes=49	32461654
Q9UEE5	STK17A	G29R	G	29	R	-	germline	neutral	gnomAD	AF=0.00126850, allele-count=1647, n-homozygotes=44	32461654
Q9P289	STK26	R45C	R	45	C	76	germline	neutral	gnomAD	AF=0.00555771, allele-count=6101, n-homozygotes=13	32461654
Q13188	STK3	S40N	S	40	N	44	germline	neutral	gnomAD	AF=0.00430916, allele-count=6255, n-homozygotes=19	32461654
Q9BXU1	STK31	A489P	A	489	P	-	not assigned	ambiguous/unknown	PubMed	-	32461654
Q9BXU1	STK31	S125F	S	125	F	-	not assigned	ambiguous/unknown	PubMed	-	32461654
Q9BXU1	STK31	T1010S	T	1010	S	-	not assigned	ambiguous/unknown	PubMed	-	32461654
Q9BXU1	STK31	Q71H	Q	71	H	-	germline	neutral	gnomAD	AF=0.287097, allele-count=418685, n-homozygotes=61991	32461654
Q9BXU1	STK31	I277K	I	277	K	-	germline	neutral	gnomAD	AF=0.00187571, allele-count=2667, n-homozygotes=7	32461654
Q9BXU1	STK31	G387E	G	387	E	-	germline	neutral	gnomAD	AF=0.166629, allele-count=243465, n-homozygotes=23107	32461654
Q9BXU1	STK31	H684R	H	684	R	-	germline	neutral	gnomAD	AF=0.00600254, allele-count=8735, n-homozygotes=67	32461654
Q9BXU1	STK31	Q940R	Q	940	R	661	germline	neutral	gnomAD	AF=0.00176564, allele-count=2546, n-homozygotes=48	32461654
Q9BXU1	STK31	T1000M	T	1000	M	-	germline	neutral	gnomAD	AF=0.00131985, allele-count=1929, n-homozygotes=3	32461654
Q86UX6	STK32C	A14V	A	14	V	-	germline	neutral	gnomAD	AF=0.0170726, allele-count=14493, n-homozygotes=174	32461654
Q8TDR2	STK35	R69G	R	69	G	-	germline	neutral	gnomAD	AF=0.387502, allele-count=525369, n-homozygotes=103974	32461654
Q8TDR2	STK35	G85A	G	85	A	-	germline	neutral	gnomAD	AF=0.00928165, allele-count=11570, n-homozygotes=89	32461654
Q9NRP7	STK36	D415E	D	415	E	-	germline	neutral	gnomAD	AF=0.00250649, allele-count=3664, n-homozygotes=182	32461654
Q9NRP7	STK36	Q638P	Q	638	P	-	germline	neutral	gnomAD	AF=0.00621842, allele-count=9090, n-homozygotes=819	32461654
Q9NRP7	STK36	Q696P	Q	696	P	-	germline	neutral	gnomAD	AF=0.00212124, allele-count=3101, n-homozygotes=16	32461654
Q9NRP7	STK36	L790V	L	790	V	-	germline	neutral	gnomAD	AF=0.00218365, allele-count=3192, n-homozygotes=87	32461654
Q9NRP7	STK36	R839Q	R	839	Q	-	germline	neutral	gnomAD	AF=0.00776629, allele-count=11352, n-homozygotes=70	32461654
Q9NRP7	STK36	C1231G	C	1231	G	-	germline	neutral	gnomAD	AF=0.00622252, allele-count=9096, n-homozygotes=819	32461654
Q9NRP7	STK36	S1280P	S	1280	P	-	germline	neutral	gnomAD	AF=0.00356394, allele-count=5210, n-homozygotes=15	32461654
Q9UEW8	STK39	A399T	A	399	T	-	germline	neutral	gnomAD	AF=0.0127377, allele-count=18621, n-homozygotes=148	32461654
Q13043	STK4	T353A	T	353	A	-	germline	neutral	gnomAD	AF=0.00166636, allele-count=2436, n-homozygotes=4	32461654
Q8NE28	STKLD1	I119T	I	119	T	253	germline	neutral	gnomAD	AF=0.00142294, allele-count=2080, n-homozygotes=50	32461654
Q8NE28	STKLD1	Q313H	Q	313	H	-	germline	neutral	gnomAD	AF=0.00183356, allele-count=2680, n-homozygotes=64	32461654
Q7RTN6	STRADA	S264R	S	264	R	590	germline	loss/decrease	PubMed	-	37722301
Q6J9G0	STYK1	R110W	R	110	W	25	germline	neutral	gnomAD	AF=0.00166223, allele-count=2430, n-homozygotes=6	32461654
Q8TEA7	TBCK	D377V	D	377	V	-	germline	neutral	gnomAD	AF=0.00304432, allele-count=4437, n-homozygotes=8	32461654
Q8TEA7	TBCK	V325A	V	325	A	-	germline	neutral	gnomAD	AF=0.00110863, allele-count=1609, n-homozygotes=12	32461654
Q8TEA7	TBCK	D145N	D	145	N	507	germline	neutral	gnomAD	AF=0.0148557, allele-count=18430, n-homozygotes=179	32461654
Q9UHD2	TBK1	S511A	S	511	A	-	experimental	loss/decrease	PubMed	-	36384137
Q9UHD2	TBK1	S511E	S	511	E	-	experimental	activating/increase	PubMed	-	36384137
Q9UHD2	TBK1	R573H	R	573	H	-	not assigned	ambiguous/unknown	PubMed	-	37197644
Q9UHD2	TBK1	Y235F	Y	235	F	858	not assigned	ambiguous/unknown	PubMed	-	36408501
Q9UHD2	TBK1	R573G	R	573	G	-	germline	ambiguous/unkonwn	PubMed	-	36769169
Q02763	TEK	T693I	T	693	I	-	not assigned	ambiguous/unknown	PubMed	-	36995002
Q02763	TEK	L634F	L	634	F	-	germline	neutral	gnomAD	AF=0.00132450, allele-count=1936, n-homozygotes=8	32461654
Q96S53	TESK2	R455C	R	455	C	-	germline	neutral	gnomAD	AF=0.0701426, allele-count=102537, n-homozygotes=4046	32461654
Q96S53	TESK2	V32M	V	32	M	1	germline	neutral	gnomAD	AF=0.00404619, allele-count=5915, n-homozygotes=20	32461654
Q96S53	TESK2	R18H	R	18	H	-	germline	neutral	gnomAD	AF=0.00256659, allele-count=3752, n-homozygotes=48	32461654
P36897	TGFBR1	H105D	H	105	D	-	not assigned	ambiguous/unknown	PubMed	-	36584339
P36897	TGFBR1	R398C	R	398	C	584	not assigned	ambiguous/unknown	PubMed	-	37998513
P36897	TGFBR1	R398H	R	398	H	584	not assigned	ambiguous/unknown	PubMed	-	37998513
P36897	TGFBR1	R80Q	R	80	Q	-	not assigned	ambiguous/unknown	PubMed	-	36584339
P37173	TGFBR2	R528H	R	528	H	832	not assigned	ambiguous/unknown	PubMed	-	37168749
P37173	TGFBR2	T315M	T	315	M	214	not assigned	ambiguous/unknown	PubMed	-	37029342
P37173	TGFBR2	V387M	V	387	M	434	germline	neutral	gnomAD	AF=0.00176671, allele-count=2582, n-homozygotes=4	32461654
P37173	TGFBR2	S553T	S	553	T	867	germline	neutral	gnomAD	AF=0.00109450, allele-count=1600, n-homozygotes=13	32461654
P35590	TIE1	V136M	V	136	M	-	germline	neutral	gnomAD	AF=0.00105632, allele-count=1543, n-homozygotes=10	32461654
Q9UKI8	TLK1	M566T	M	566	T	379	germline	loss/decrease	PubMed	-	37662408
Q9UKI8	TLK1	Q479E	Q	479	E	83	germline	loss/decrease	PubMed	-	37662408
Q9UKE5	TNIK	A1054T	A	1054	T	-	germline	neutral	gnomAD	AF=0.0800201, allele-count=116160, n-homozygotes=5115	32461654
Q9UKE5	TNIK	E962A	E	962	A	-	germline	neutral	gnomAD	AF=0.00500567, allele-count=7314, n-homozygotes=26	32461654
Q13470	TNK1	A299D	A	299	D	550	germline	neutral	gnomAD	AF=0.00827493, allele-count=11859, n-homozygotes=77	32461654
Q07912	TNK2	R1038H	R	1038	H	-	germline	neutral	gnomAD	AF=0.0445354, allele-count=65092, n-homozygotes=1709	32461654
Q07912	TNK2	S985N	S	985	N	-	germline	neutral	gnomAD	AF=0.00135552, allele-count=1980, n-homozygotes=4	32461654
Q07912	TNK2	V890M	V	890	M	-	germline	neutral	gnomAD	AF=0.00888332, allele-count=12749, n-homozygotes=77	32461654
Q07912	TNK2	R877H	R	877	H	-	germline	neutral	gnomAD	AF=0.0178402, allele-count=25818, n-homozygotes=279	32461654
Q07912	TNK2	P674S	P	674	S	-	germline	neutral	gnomAD	AF=0.00101946, allele-count=1482, n-homozygotes=3	32461654
Q07912	TNK2	S522I	S	522	I	-	germline	neutral	gnomAD	AF=0.00163171, allele-count=2346, n-homozygotes=4	32461654
Q07912	TNK2	L510V	L	510	V	-	germline	neutral	gnomAD	AF=0.00258899, allele-count=3393, n-homozygotes=11	32461654
Q07912	TNK2	P507S	P	507	S	-	germline	neutral	gnomAD	AF=0.00140573, allele-count=1858, n-homozygotes=3	32461654
Q59H18	TNNI3K	H592Y	H	592	Y	430	germline	activating/increase	PubMed	-	37199186
Q59H18	TNNI3K	I512T	I	512	T	152	germline	activating/increase	PubMed	-	37199186
Q59H18	TNNI3K	L577F	L	577	F	391	germline	loss/decrease	PubMed	-	38424693
Q59H18	TNNI3K	P742L	P	742	L	873	germline	loss/decrease	PubMed	-	38424693
Q59H18	TNNI3K	R406W	R	406	W	-	not assigned	ambiguous/unknown	PubMed	-	38314304
Q59H18	TNNI3K	T539A	T	539	A	233	not assigned	ambiguous/unknown	PubMed	-	38424693
Q59H18	TNNI3K	L171S	L	171	S	-	germline	neutral	gnomAD	AF=0.00161557, allele-count=2361, n-homozygotes=5	32461654
Q59H18	TNNI3K	L259F	L	259	F	-	germline	neutral	gnomAD	AF=0.00250679, allele-count=3664, n-homozygotes=8	32461654
Q96S44	TP53RK	R249G	R	249	G	-	germilne	loss/decrease	PubMed	inferred	36873107
Q96S44	TP53RK	R62H	R	62	H	20	not assigned	ambiguous/unknown	PubMed	-	36873107
Q96S44	TP53RK	Y112C	Y	112	C	232	not assigned	ambiguous/unknown	PubMed	-	36873107
Q96S44	TP53RK	T8M	T	8	M	-	germline	neutral	gnomAD	AF=0.00115588, allele-count=1634, n-homozygotes=37	32461654
Q96RU7	TRIB3	Q84R	Q	84	R	-	germline	activating/increase	PubMed	gain-of-function	38237865
Q96RU7	TRIB3	R29C	R	29	C	-	germline	neutral	gnomAD	AF=0.00107333, allele-count=1569, n-homozygotes=5	32461654
Q96RU7	TRIB3	Q84R	Q	84	R	-	germline	neutral	gnomAD	AF=0.171962, allele-count=251193, n-homozygotes=24591	32461654
Q96RU7	TRIB3	V107M	V	107	M	-	germline	neutral	gnomAD	AF=0.00375694, allele-count=5487, n-homozygotes=24	32461654
Q96RU7	TRIB3	S146N	S	146	N	-	germline	neutral	gnomAD	AF=0.00765147, allele-count=11183, n-homozygotes=77	32461654
Q96RU7	TRIB3	R181C	R	181	C	424	germline	neutral	gnomAD	AF=0.00114864, allele-count=1678, n-homozygotes=2	32461654
Q96RU7	TRIB3	G276R	G	276	R	661	germline	neutral	gnomAD	AF=0.00117161, allele-count=1711, n-homozygotes=3	32461654
Q9BXA7	TSSK1B	S336C	S	336	C	-	germline	neutral	gnomAD	AF=0.00666022, allele-count=9735, n-homozygotes=71	32461654
Q9BXA7	TSSK1B	V233L	V	233	L	691	germline	neutral	gnomAD	AF=0.00265481, allele-count=3881, n-homozygotes=89	32461654
Q6SA08	TSSK4	Y89C	Y	89	C	183	germline	neutral	gnomAD	AF=0.00327453, allele-count=4787, n-homozygotes=12	32461654
Q5TCY1	TTBK1	G623A	G	623	A	-	germline	neutral	gnomAD	AF=0.339926, allele-count=481633, n-homozygotes=82124	32461654
Q5TCY1	TTBK1	D694N	D	694	N	-	germline	neutral	gnomAD	AF=0.00439302, allele-count=6422, n-homozygotes=18	32461654
Q5TCY1	TTBK1	E744D	E	744	D	-	germline	neutral	gnomAD	AF=0.0649634, allele-count=94626, n-homozygotes=3362	32461654
Q5TCY1	TTBK1	E760A	E	760	A	-	germline	neutral	gnomAD	AF=0.00233512, allele-count=3364, n-homozygotes=8	32461654
Q5TCY1	TTBK1	R1044C	R	1044	C	-	germline	neutral	gnomAD	AF=0.00101067, allele-count=1474, n-homozygotes=4	32461654
Q5TCY1	TTBK1	P1233A	P	1233	A	-	germline	neutral	gnomAD	AF=0.00888446, allele-count=11720, n-homozygotes=111	32461654
Q5TCY1	TTBK1	P1262R	P	1262	R	-	germline	neutral	gnomAD	AF=0.00587270, allele-count=7087, n-homozygotes=31	32461654
Q6IQ55	TTBK2	R1110H	R	1110	H	-	germline	neutral	gnomAD	AF=0.00108012, allele-count=1579, n-homozygotes=4	32461654
P33981	TTK	R185W	R	185	W	-	germline	neutral	gnomAD	AF=0.00172393, allele-count=2517, n-homozygotes=4	32461654
P33981	TTK	D250G	D	250	G	-	germline	neutral	gnomAD	AF=0.00119469, allele-count=1745, n-homozygotes=22	32461654
P42681	TXK	R63C	R	63	C	-	germline	neutral	gnomAD	AF=0.00594811, allele-count=8692, n-homozygotes=33	32461654
P29597	TYK2	R703W	R	703	W	-	germline	neutral	gnomAD	AF=0.00299760, allele-count=4372, n-homozygotes=36	32461654
P29597	TYK2	I684S	I	684	S	-	germline	neutral	gnomAD	AF=0.0820014, allele-count=119592, n-homozygotes=5615	32461654
P29597	TYK2	A53T	A	53	T	-	germline	neutral	gnomAD	AF=0.00950212, allele-count=13880, n-homozygotes=87	32461654
P29597	TYK2	V15A	V	15	A	-	germline	neutral	gnomAD	AF=0.00129107, allele-count=1885, n-homozygotes=7	32461654
Q06418	TYRO3	I620T	I	620	T	258	germline	neutral	gnomAD	AF=0.00109862, allele-count=1606, n-homozygotes=3	32461654
O75385	ULK1	S467A	S	467	A	-	germline	loss/decrease	PubMed	-	38373380
O75385	ULK1	S147A	S	147	A	435	not assigned	ambiguous/unknown	PubMed	-	37505094
O75385	ULK1	S56A	S	56	A	120	not assigned	ambiguous/unknown	PubMed	-	38324636
O75385	ULK1	T242I	T	242	I	695	germline	neutral	gnomAD	AF=0.00307532, allele-count=4488, n-homozygotes=13	32461654
O75385	ULK1	T452S	T	452	S	-	germline	neutral	gnomAD	AF=0.0114080, allele-count=16659, n-homozygotes=121	32461654
O75385	ULK1	P574R	P	574	R	-	germline	neutral	gnomAD	AF=0.00220050, allele-count=3213, n-homozygotes=8	32461654
O75385	ULK1	A705V	A	705	V	-	germline	neutral	gnomAD	AF=0.00183888, allele-count=2673, n-homozygotes=6	32461654
O75385	ULK1	G745V	G	745	V	-	germline	neutral	gnomAD	AF=0.00246955, allele-count=3399, n-homozygotes=20	32461654
Q8IYT8	ULK2	V886M	V	886	M	-	germline	neutral	gnomAD	AF=0.00134865, allele-count=1969, n-homozygotes=29	32461654
Q8IYT8	ULK2	R881Q	R	881	Q	-	germline	neutral	gnomAD	AF=0.00112298, allele-count=1641, n-homozygotes=19	32461654
Q8IYT8	ULK2	D500A	D	500	A	-	germline	neutral	gnomAD	AF=0.00501212, allele-count=7200, n-homozygotes=24	32461654
Q96C45	ULK4	V1126A	V	1126	A	-	germline	neutral	gnomAD	AF=0.00181761, allele-count=2656, n-homozygotes=3	32461654
Q96C45	ULK4	V963M	V	963	M	-	germline	neutral	gnomAD	AF=0.00419620, allele-count=6134, n-homozygotes=13	32461654
Q96C45	ULK4	V851I	V	851	I	-	germline	neutral	gnomAD	AF=0.176285, allele-count=257617, n-homozygotes=25242	32461654
Q96C45	ULK4	L844M	L	844	M	-	germline	neutral	gnomAD	AF=0.176292, allele-count=257631, n-homozygotes=25238	32461654
Q96C45	ULK4	N796S	N	796	S	-	germline	neutral	gnomAD	AF=0.0236241, allele-count=34534, n-homozygotes=503	32461654
Q96C45	ULK4	V686I	V	686	I	-	germline	neutral	gnomAD	AF=0.00436407, allele-count=6376, n-homozygotes=12	32461654
Q96C45	ULK4	L570F	L	570	F	-	germline	neutral	gnomAD	AF=0.00351358, allele-count=5135, n-homozygotes=11	32461654
Q96C45	ULK4	P391S	P	391	S	-	germline	neutral	gnomAD	AF=0.00475900, allele-count=6833, n-homozygotes=19	32461654
Q96C45	ULK4	S348G	S	348	G	-	germline	neutral	gnomAD	AF=0.138178, allele-count=201910, n-homozygotes=14763	32461654
Q86Y07	VRK2	I35T	I	35	T	37	germline	neutral	gnomAD	AF=0.00365354, allele-count=5340, n-homozygotes=44	32461654
Q86Y07	VRK2	G113E	G	113	E	216	germline	neutral	gnomAD	AF=0.00260711, allele-count=3741, n-homozygotes=14	32461654
Q9H4A3	WNK1	E630G	E	630	G	-	not assigned	ambiguous/unknown	PubMed	-	37895227
Q9H4A3	WNK1	S382A	S	382	A	529	not assigned	ambiguous/unknown	PubMed	-	37693587
Q9H4A3	WNK1	T619A	T	619	A	-	germline	neutral	gnomAD	AF=0.00140094, allele-count=2048, n-homozygotes=2	32461654
Q9H4A3	WNK1	I694T	I	694	T	-	germline	neutral	gnomAD	AF=0.00170197, allele-count=2488, n-homozygotes=44	32461654
Q9H4A3	WNK1	I736V	I	736	V	-	germline	neutral	gnomAD	AF=0.00145704, allele-count=2130, n-homozygotes=16	32461654
Q9H4A3	WNK1	T1452A	T	1452	A	-	germline	neutral	gnomAD	AF=0.00131822, allele-count=1927, n-homozygotes=16	32461654
[truncated: 36 more rows]

## Sheet: C Domain Enrichment
Table S1C: Enrichment/depletion of variants of different types inside the kinase catalytic domain
[truncated: 44 more rows]

[truncated: 5 more sheets: D Kinases_summary, E Alignment_human_kinases, F HMM_human_kinases, G Known_PTM_sites, H Known_ATP_binding_sites]
