# Supplementary material for: Discriminating activating, deactivating and resistance variants in protein kinases
Source: Research Square preprint supplement (doi:10.21203/rs.3.rs-5001235/v1), 2024-09-30
Supplement: Supplementary file 3 [file 8579947ccd0b73e499b0f530.xlsx]

## Sheet: A Features
Table S2A: Features used to develop the predictors
Feature	Description	Position in the window (+/-2)
hmmScoreWT	score of the wt AA in pan kinase profile HMM	0
hmmScoreMUT	score of the mut AA in pan kinase profile HMM	0
Phosphomimic	1 (if S/T/Y -> D/E); -1 is WT=S/T/Y; else 0	0
Acetylmimic	1 (if K -> Q); -1 is WT=K; else 0	0
IUPRED	log-odds scores of the variant from IUPred predictions	0
ATPcount	Number of proteins with known ATP-Binding site at the equivalent position in the alignment	0
ncontacts	Number of intra-molecular contacts the given variant position makes	0
nresidues	Number of residues in contact with the given variant site	0
mech_intra	Mechismo intra-molecular scores	0
phi_psi	log-odds scores of the variant of Phi/Psi angles using AF structure	0
sec	log-odds scores of the variant using DSSP	0
burr	log-odds scores of the variant using DSSP	0
acc	log-odds scores of the variant using DSSP	0
ChargesWT	Charge on the WT aa	0
ChargesMUT	Charge on the MUT aa	0
ChargesDiff	Difference between the charges (MUT-WT)	0
ac_-2	1 If the given position (relative to the variant site) is an acetylation site else 0	-2
gl_-2	1 If the given position (relative to the variant site) is an O-GlcNAc site else 0	-2
m1_-2	1 If the given position (relative to the variant site) is a Mono-methylation site else 0	-2
m2_-2	1 If the given position (relative to the variant site) is a Di-methylation site else 0	-2
m3_-2	1 If the given position (relative to the variant site) is a Tri-methylation site else 0	-2
me_-2	1 If the given position (relative to the variant site) is a Methylation site else 0	-2
p_-2	1 If the given position (relative to the variant site) is a Phosphorylation site else 0	-2
sm_-2	1 If the given position (relative to the variant site) is a Sumoylation site else 0	-2
ub_-2	1 If the given position (relative to the variant site) is a Ubiquitination site else 0	-2
ac_-2_pfam	Number of kinases that have an acetylation site at the equvalent position in the alignment	-2
gl_-2_pfam	Number of kinases that have an O-GlcNAc site at the equvalent position in the alignment	-2
m1_-2_pfam	Number of kinases that have an Mono-methylation site at the equvalent position in the alignment	-2
m2_-2_pfam	Number of kinases that have an Di-methylation site at the equvalent position in the alignment	-2
m3_-2_pfam	Number of kinases that have an Tri-methylation site at the equvalent position in the alignment	-2
me_-2_pfam	Number of kinases that have an Methylation site at the equvalent position in the alignment	-2
p_-2_pfam	Number of kinases that have an Phosphorylation site at the equvalent position in the alignment	-2
sm_-2_pfam	Number of kinases that have an Sumoylation site at the equvalent position in the alignment	-2
ub_-2_pfam	Number of kinases that have an Ubiquitination site at the equvalent position in the alignment	-2
ac_-1	1 If the given position (relative to the variant site) is an acetylation site else 0	-1
gl_-1	1 If the given position (relative to the variant site) is an O-GlcNAc site else 0	-1
m1_-1	1 If the given position (relative to the variant site) is a Mono-methylation site else 0	-1
m2_-1	1 If the given position (relative to the variant site) is a Di-methylation site else 0	-1
m3_-1	1 If the given position (relative to the variant site) is a Tri-methylation site else 0	-1
me_-1	1 If the given position (relative to the variant site) is a Methylation site else 0	-1
p_-1	1 If the given position (relative to the variant site) is a Phosphorylation site else 0	-1
sm_-1	1 If the given position (relative to the variant site) is a Sumoylation site else 0	-1
ub_-1	1 If the given position (relative to the variant site) is a Ubiquitination site else 0	-1
ac_-1_pfam	Number of kinases that have an acetylation site at the equvalent position in the alignment	-1
gl_-1_pfam	Number of kinases that have an O-GlcNAc site at the equvalent position in the alignment	-1
m1_-1_pfam	Number of kinases that have an Mono-methylation site at the equvalent position in the alignment	-1
m2_-1_pfam	Number of kinases that have an Di-methylation site at the equvalent position in the alignment	-1
m3_-1_pfam	Number of kinases that have an Tri-methylation site at the equvalent position in the alignment	-1
me_-1_pfam	Number of kinases that have an Methylation site at the equvalent position in the alignment	-1
p_-1_pfam	Number of kinases that have an Phosphorylation site at the equvalent position in the alignment	-1
sm_-1_pfam	Number of kinases that have an Sumoylation site at the equvalent position in the alignment	-1
ub_-1_pfam	Number of kinases that have an Ubiquitination site at the equvalent position in the alignment	-1
ac_0	1 If the given position (relative to the variant site) is an acetylation site else 0	0
gl_0	1 If the given position (relative to the variant site) is an O-GlcNAc site else 0	0
m1_0	1 If the given position (relative to the variant site) is a Mono-methylation site else 0	0
m2_0	1 If the given position (relative to the variant site) is a Di-methylation site else 0	0
m3_0	1 If the given position (relative to the variant site) is a Tri-methylation site else 0	0
me_0	1 If the given position (relative to the variant site) is a Methylation site else 0	0
p_0	1 If the given position (relative to the variant site) is a Phosphorylation site else 0	0
sm_0	1 If the given position (relative to the variant site) is a Sumoylation site else 0	0
ub_0	1 If the given position (relative to the variant site) is a Ubiquitination site else 0	0
ac_0_pfam	Number of kinases that have an acetylation site at the equvalent position in the alignment	0
gl_0_pfam	Number of kinases that have an O-GlcNAc site at the equvalent position in the alignment	0
m1_0_pfam	Number of kinases that have an Mono-methylation site at the equvalent position in the alignment	0
m2_0_pfam	Number of kinases that have an Di-methylation site at the equvalent position in the alignment	0
m3_0_pfam	Number of kinases that have an Tri-methylation site at the equvalent position in the alignment	0
me_0_pfam	Number of kinases that have an Methylation site at the equvalent position in the alignment	0
p_0_pfam	Number of kinases that have an Phosphorylation site at the equvalent position in the alignment	0
sm_0_pfam	Number of kinases that have an Sumoylation site at the equvalent position in the alignment	0
ub_0_pfam	Number of kinases that have an Ubiquitination site at the equvalent position in the alignment	0
ac_1	1 If the given position (relative to the variant site) is an acetylation site else 0	1
gl_1	1 If the given position (relative to the variant site) is an O-GlcNAc site else 0	1
m1_1	1 If the given position (relative to the variant site) is a Mono-methylation site else 0	1
m2_1	1 If the given position (relative to the variant site) is a Di-methylation site else 0	1
m3_1	1 If the given position (relative to the variant site) is a Tri-methylation site else 0	1
me_1	1 If the given position (relative to the variant site) is a Methylation site else 0	1
p_1	1 If the given position (relative to the variant site) is a Phosphorylation site else 0	1
sm_1	1 If the given position (relative to the variant site) is a Sumoylation site else 0	1
ub_1	1 If the given position (relative to the variant site) is a Ubiquitination site else 0	1
ac_1_pfam	Number of kinases that have an acetylation site at the equvalent position in the alignment	1
gl_1_pfam	Number of kinases that have an O-GlcNAc site at the equvalent position in the alignment	1
m1_1_pfam	Number of kinases that have an Mono-methylation site at the equvalent position in the alignment	1
m2_1_pfam	Number of kinases that have an Di-methylation site at the equvalent position in the alignment	1
m3_1_pfam	Number of kinases that have an Tri-methylation site at the equvalent position in the alignment	1
me_1_pfam	Number of kinases that have an Methylation site at the equvalent position in the alignment	1
p_1_pfam	Number of kinases that have an Phosphorylation site at the equvalent position in the alignment	1
sm_1_pfam	Number of kinases that have an Sumoylation site at the equvalent position in the alignment	1
ub_1_pfam	Number of kinases that have an Ubiquitination site at the equvalent position in the alignment	1
ac_2	1 If the given position (relative to the variant site) is an acetylation site else 0	2
gl_2	1 If the given position (relative to the variant site) is an O-GlcNAc site else 0	2
m1_2	1 If the given position (relative to the variant site) is a Mono-methylation site else 0	2
m2_2	1 If the given position (relative to the variant site) is a Di-methylation site else 0	2
m3_2	1 If the given position (relative to the variant site) is a Tri-methylation site else 0	2
me_2	1 If the given position (relative to the variant site) is a Methylation site else 0	2
p_2	1 If the given position (relative to the variant site) is a Phosphorylation site else 0	2
sm_2	1 If the given position (relative to the variant site) is a Sumoylation site else 0	2
ub_2	1 If the given position (relative to the variant site) is a Ubiquitination site else 0	2
ac_2_pfam	Number of kinases that have an acetylation site at the equvalent position in the alignment	2
gl_2_pfam	Number of kinases that have an O-GlcNAc site at the equvalent position in the alignment	2
m1_2_pfam	Number of kinases that have an Mono-methylation site at the equvalent position in the alignment	2
m2_2_pfam	Number of kinases that have an Di-methylation site at the equvalent position in the alignment	2
m3_2_pfam	Number of kinases that have an Tri-methylation site at the equvalent position in the alignment	2
me_2_pfam	Number of kinases that have an Methylation site at the equvalent position in the alignment	2
p_2_pfam	Number of kinases that have an Phosphorylation site at the equvalent position in the alignment	2
sm_2_pfam	Number of kinases that have an Sumoylation site at the equvalent position in the alignment	2
ub_2_pfam	Number of kinases that have an Ubiquitination site at the equvalent position in the alignment	2
A_WT	1 if the WT is A else 0	0
C_WT	1 if the WT is C else 0	0
D_WT	1 if the WT is D else 0	0
E_WT	1 if the WT is E else 0	0
F_WT	1 if the WT is F else 0	0
G_WT	1 if the WT is G else 0	0
H_WT	1 if the WT is H else 0	0
I_WT	1 if the WT is I else 0	0
K_WT	1 if the WT is K else 0	0
L_WT	1 if the WT is L else 0	0
M_WT	1 if the WT is M else 0	0
N_WT	1 if the WT is N else 0	0
P_WT	1 if the WT is P else 0	0
Q_WT	1 if the WT is Q else 0	0
R_WT	1 if the WT is R else 0	0
S_WT	1 if the WT is S else 0	0
T_WT	1 if the WT is T else 0	0
V_WT	1 if the WT is V else 0	0
W_WT	1 if the WT is W else 0	0
Y_WT	1 if the WT is Y else 0	0
A_MUT	1 if the MUT is A else 0	0
C_MUT	1 if the MUT is C else 0	0
D_MUT	1 if the MUT is D else 0	0
E_MUT	1 if the MUT is E else 0	0
F_MUT	1 if the MUT is F else 0	0
G_MUT	1 if the MUT is G else 0	0
H_MUT	1 if the MUT is H else 0	0
I_MUT	1 if the MUT is I else 0	0
K_MUT	1 if the MUT is K else 0	0
L_MUT	1 if the MUT is L else 0	0
M_MUT	1 if the MUT is M else 0	0
N_MUT	1 if the MUT is N else 0	0
P_MUT	1 if the MUT is P else 0	0
Q_MUT	1 if the MUT is Q else 0	0
R_MUT	1 if the MUT is R else 0	0
S_MUT	1 if the MUT is S else 0	0
T_MUT	1 if the MUT is T else 0	0
V_MUT	1 if the MUT is V else 0	0
W_MUT	1 if the MUT is W else 0	0
Y_MUT	1 if the MUT is Y else 0	0
allHomologs_0	log-odds score of the variant (MUT-WT) in the corresponding alignment	0
exclParalogs_0	log-odds score of the variant (MUT-WT) in the corresponding alignment	0
specParalogs_0	log-odds score of the variant (MUT-WT) in the corresponding alignment	0
orthologs_0	log-odds score of the variant (MUT-WT) in the corresponding alignment	0
bpso_0	log-odds score of the variant (MUT-WT) in the corresponding alignment	0
bpsh_0	log-odds score of the variant (MUT-WT) in the corresponding alignment	0
eukaryotes_0	log-odds score of the variant (MUT-WT) in the corresponding alignment	0
mammals_0	log-odds score of the variant (MUT-WT) in the corresponding alignment	0
metazoa_0	log-odds score of the variant (MUT-WT) in the corresponding alignment	0
vertebrates_0	log-odds score of the variant (MUT-WT) in the corresponding alignment	0
A_A_-2_pfam	X_Y_Z_pfam; X is mut_type (A/D/R); Y is AA(20 possibilities); Z is position relative to the variant site [-2,2]; Counts represent how many times the given amino acid was lost (WT) or gained (MUT) in known mutations at the position Z relative to the given variant in the alignment	-2
A_C_-2_pfam		-2
A_D_-2_pfam		-2
A_E_-2_pfam		-2
A_F_-2_pfam		-2
A_G_-2_pfam		-2
A_H_-2_pfam		-2
A_I_-2_pfam		-2
A_K_-2_pfam		-2
A_L_-2_pfam		-2
A_M_-2_pfam		-2
A_N_-2_pfam		-2
A_P_-2_pfam		-2
A_Q_-2_pfam		-2
A_R_-2_pfam		-2
A_S_-2_pfam		-2
A_T_-2_pfam		-2
A_V_-2_pfam		-2
A_W_-2_pfam		-2
A_Y_-2_pfam		-2
D_A_-2_pfam		-2
D_C_-2_pfam		-2
D_D_-2_pfam		-2
D_E_-2_pfam		-2
D_F_-2_pfam		-2
D_G_-2_pfam		-2
D_H_-2_pfam		-2
D_I_-2_pfam		-2
D_K_-2_pfam		-2
D_L_-2_pfam		-2
D_M_-2_pfam		-2
D_N_-2_pfam		-2
D_P_-2_pfam		-2
D_Q_-2_pfam		-2
D_R_-2_pfam		-2
D_S_-2_pfam		-2
D_T_-2_pfam		-2
D_V_-2_pfam		-2
D_W_-2_pfam		-2
D_Y_-2_pfam		-2
R_A_-2_pfam		-2
R_C_-2_pfam		-2
R_D_-2_pfam		-2
R_E_-2_pfam		-2
R_F_-2_pfam		-2
R_G_-2_pfam		-2
R_H_-2_pfam		-2
R_I_-2_pfam		-2
R_K_-2_pfam		-2
R_L_-2_pfam		-2
R_M_-2_pfam		-2
R_N_-2_pfam		-2
R_P_-2_pfam		-2
R_Q_-2_pfam		-2
R_R_-2_pfam		-2
R_S_-2_pfam		-2
R_T_-2_pfam		-2
R_V_-2_pfam		-2
R_W_-2_pfam		-2
R_Y_-2_pfam		-2
A_A_-1_pfam		-1
A_C_-1_pfam		-1
A_D_-1_pfam		-1
A_E_-1_pfam		-1
A_F_-1_pfam		-1
A_G_-1_pfam		-1
A_H_-1_pfam		-1
A_I_-1_pfam		-1
A_K_-1_pfam		-1
A_L_-1_pfam		-1
A_M_-1_pfam		-1
A_N_-1_pfam		-1
A_P_-1_pfam		-1
A_Q_-1_pfam		-1
A_R_-1_pfam		-1
A_S_-1_pfam		-1
A_T_-1_pfam		-1
A_V_-1_pfam		-1
A_W_-1_pfam		-1
A_Y_-1_pfam		-1
D_A_-1_pfam		-1
D_C_-1_pfam		-1
D_D_-1_pfam		-1
D_E_-1_pfam		-1
D_F_-1_pfam		-1
D_G_-1_pfam		-1
D_H_-1_pfam		-1
D_I_-1_pfam		-1
D_K_-1_pfam		-1
D_L_-1_pfam		-1
D_M_-1_pfam		-1
D_N_-1_pfam		-1
D_P_-1_pfam		-1
D_Q_-1_pfam		-1
D_R_-1_pfam		-1
D_S_-1_pfam		-1
D_T_-1_pfam		-1
D_V_-1_pfam		-1
D_W_-1_pfam		-1
D_Y_-1_pfam		-1
R_A_-1_pfam		-1
R_C_-1_pfam		-1
R_D_-1_pfam		-1
R_E_-1_pfam		-1
R_F_-1_pfam		-1
R_G_-1_pfam		-1
R_H_-1_pfam		-1
R_I_-1_pfam		-1
R_K_-1_pfam		-1
R_L_-1_pfam		-1
R_M_-1_pfam		-1
R_N_-1_pfam		-1
R_P_-1_pfam		-1
R_Q_-1_pfam		-1
R_R_-1_pfam		-1
R_S_-1_pfam		-1
R_T_-1_pfam		-1
R_V_-1_pfam		-1
R_W_-1_pfam		-1
R_Y_-1_pfam		-1
A_A_0_pfam		0
A_C_0_pfam		0
A_D_0_pfam		0
A_E_0_pfam		0
A_F_0_pfam		0
A_G_0_pfam		0
A_H_0_pfam		0
A_I_0_pfam		0
A_K_0_pfam		0
A_L_0_pfam		0
A_M_0_pfam		0
A_N_0_pfam		0
A_P_0_pfam		0
A_Q_0_pfam		0
A_R_0_pfam		0
A_S_0_pfam		0
A_T_0_pfam		0
A_V_0_pfam		0
A_W_0_pfam		0
A_Y_0_pfam		0
D_A_0_pfam		0
D_C_0_pfam		0
D_D_0_pfam		0
D_E_0_pfam		0
D_F_0_pfam		0
D_G_0_pfam		0
D_H_0_pfam		0
D_I_0_pfam		0
D_K_0_pfam		0
D_L_0_pfam		0
D_M_0_pfam		0
D_N_0_pfam		0
D_P_0_pfam		0
D_Q_0_pfam		0
D_R_0_pfam		0
D_S_0_pfam		0
D_T_0_pfam		0
D_V_0_pfam		0
D_W_0_pfam		0
D_Y_0_pfam		0
R_A_0_pfam		0
R_C_0_pfam		0
R_D_0_pfam		0
R_E_0_pfam		0
R_F_0_pfam		0
R_G_0_pfam		0
R_H_0_pfam		0
R_I_0_pfam		0
R_K_0_pfam		0
R_L_0_pfam		0
R_M_0_pfam		0
R_N_0_pfam		0
R_P_0_pfam		0
R_Q_0_pfam		0
R_R_0_pfam		0
R_S_0_pfam		0
R_T_0_pfam		0
R_V_0_pfam		0
R_W_0_pfam		0
R_Y_0_pfam		0
A_A_1_pfam		1
A_C_1_pfam		1
A_D_1_pfam		1
A_E_1_pfam		1
A_F_1_pfam		1
A_G_1_pfam		1
A_H_1_pfam		1
A_I_1_pfam		1
A_K_1_pfam		1
A_L_1_pfam		1
A_M_1_pfam		1
A_N_1_pfam		1
A_P_1_pfam		1
A_Q_1_pfam		1
A_R_1_pfam		1
A_S_1_pfam		1
A_T_1_pfam		1
A_V_1_pfam		1
A_W_1_pfam		1
A_Y_1_pfam		1
D_A_1_pfam		1
D_C_1_pfam		1
D_D_1_pfam		1
D_E_1_pfam		1
D_F_1_pfam		1
D_G_1_pfam		1
D_H_1_pfam		1
D_I_1_pfam		1
D_K_1_pfam		1
D_L_1_pfam		1
D_M_1_pfam		1
D_N_1_pfam		1
D_P_1_pfam		1
D_Q_1_pfam		1
D_R_1_pfam		1
D_S_1_pfam		1
D_T_1_pfam		1
D_V_1_pfam		1
D_W_1_pfam		1
D_Y_1_pfam		1
R_A_1_pfam		1
R_C_1_pfam		1
R_D_1_pfam		1
R_E_1_pfam		1
R_F_1_pfam		1
R_G_1_pfam		1
R_H_1_pfam		1
R_I_1_pfam		1
R_K_1_pfam		1
R_L_1_pfam		1
R_M_1_pfam		1
R_N_1_pfam		1
R_P_1_pfam		1
R_Q_1_pfam		1
R_R_1_pfam		1
R_S_1_pfam		1
R_T_1_pfam		1
R_V_1_pfam		1
R_W_1_pfam		1
R_Y_1_pfam		1
A_A_2_pfam		2
A_C_2_pfam		2
A_D_2_pfam		2
A_E_2_pfam		2
A_F_2_pfam		2
A_G_2_pfam		2
A_H_2_pfam		2
A_I_2_pfam		2
A_K_2_pfam		2
A_L_2_pfam		2
A_M_2_pfam		2
A_N_2_pfam		2
A_P_2_pfam		2
A_Q_2_pfam		2
A_R_2_pfam		2
A_S_2_pfam		2
A_T_2_pfam		2
A_V_2_pfam		2
A_W_2_pfam		2
A_Y_2_pfam		2
D_A_2_pfam		2
D_C_2_pfam		2
D_D_2_pfam		2
D_E_2_pfam		2
D_F_2_pfam		2
D_G_2_pfam		2
D_H_2_pfam		2
D_I_2_pfam		2
D_K_2_pfam		2
D_L_2_pfam		2
D_M_2_pfam		2
D_N_2_pfam		2
D_P_2_pfam		2
D_Q_2_pfam		2
D_R_2_pfam		2
D_S_2_pfam		2
D_T_2_pfam		2
D_V_2_pfam		2
D_W_2_pfam		2
D_Y_2_pfam		2
R_A_2_pfam		2
R_C_2_pfam		2
R_D_2_pfam		2
R_E_2_pfam		2
R_F_2_pfam		2
R_G_2_pfam		2
R_H_2_pfam		2
R_I_2_pfam		2
R_K_2_pfam		2
R_L_2_pfam		2
R_M_2_pfam		2
R_N_2_pfam		2
R_P_2_pfam		2
R_Q_2_pfam		2
R_R_2_pfam		2
R_S_2_pfam		2
R_T_2_pfam		2
R_V_2_pfam		2
R_W_2_pfam		2
R_Y_2_pfam		2
D_C_2_pfam		2
D_D_2_pfam		2
D_E_2_pfam		2
D_F_2_pfam		2
D_G_2_pfam		2
D_H_2_pfam		2
D_I_2_pfam		2
D_K_2_pfam		2
D_L_2_pfam		2
D_M_2_pfam		2
D_N_2_pfam		2
D_P_2_pfam		2
D_Q_2_pfam		2
D_R_2_pfam		2
D_S_2_pfam		2
D_T_2_pfam		2
D_V_2_pfam		2
D_W_2_pfam		2
D_Y_2_pfam		2
R_A_2_pfam		2
R_C_2_pfam		2
R_D_2_pfam		2
R_E_2_pfam		2
R_F_2_pfam		2
R_G_2_pfam		2
R_H_2_pfam		2
R_I_2_pfam		2
R_K_2_pfam		2
R_L_2_pfam		2
R_M_2_pfam		2
R_N_2_pfam		2
R_P_2_pfam		2
R_Q_2_pfam		2
R_R_2_pfam		2
R_S_2_pfam		2
R_T_2_pfam		2
R_V_2_pfam		2
R_W_2_pfam		2
R_Y_2_pfam		2
A_-2	Number of known acitivating mutations at the position relative the given variant in the kinase	-2
D_-2	Number of known deactivating mutations at the position relative the given variant in the kinase	-2
R_-2	Number of known resistance mutations at the position relative the given variant in the kinase	-2
A_-2_pfam	Number of known acitivating mutations at the position relative the given variant in the alignment	-2
D_-2_pfam	Number of known deactivating mutations at the position relative the given variant in the alignment	-2
R_-2_pfam	Number of known resistance mutations at the position relative the given variant in the alignment	-2
A_-1	Number of known acitivating mutations at the position relative the given variant in the kinase	-1
D_-1	Number of known deactivating mutations at the position relative the given variant in the kinase	-1
R_-1	Number of known resistance mutations at the position relative the given variant in the kinase	-1
A_-1_pfam	Number of known acitivating mutations at the position relative the given variant in the alignment	-1
D_-1_pfam	Number of known deactivating mutations at the position relative the given variant in the alignment	-1
R_-1_pfam	Number of known resistance mutations at the position relative the given variant in the alignment	-1
A_0	Number of known acitivating mutations at the position relative the given variant in the kinase	0
D_0	Number of known deactivating mutations at the position relative the given variant in the kinase	0
R_0	Number of known resistance mutations at the position relative the given variant in the kinase	0
A_0_pfam	Number of known acitivating mutations at the position relative the given variant in the alignment	0
D_0_pfam	Number of known deactivating mutations at the position relative the given variant in the alignment	0
R_0_pfam	Number of known resistance mutations at the position relative the given variant in the alignment	0
A_1	Number of known acitivating mutations at the position relative the given variant in the kinase	1
D_1	Number of known deactivating mutations at the position relative the given variant in the kinase	1
R_1	Number of known resistance mutations at the position relative the given variant in the kinase	1
A_1_pfam	Number of known acitivating mutations at the position relative the given variant in the alignment	1
D_1_pfam	Number of known deactivating mutations at the position relative the given variant in the alignment	1
R_1_pfam	Number of known resistance mutations at the position relative the given variant in the alignment	1
A_2	Number of known acitivating mutations at the position relative the given variant in the kinase	2
D_2	Number of known deactivating mutations at the position relative the given variant in the kinase	2
R_2	Number of known resistance mutations at the position relative the given variant in the kinase	2
A_2_pfam	Number of known acitivating mutations at the position relative the given variant in the alignment	2
D_2_pfam	Number of known deactivating mutations at the position relative the given variant in the alignment	2
R_2_pfam	Number of known resistance mutations at the position relative the given variant in the alignment	2

## Sheet: B ML results
Table S2B: ML results during training and testing phase
Predictor type	Models	Training set											Test set
		Metrics (10-fold CV)							Count				Metrics				Count
			AUC	MCC	F1	PRE	REC	SPE	Activating	Deactivating	Resistance	Neutral	AUC	MCC	F1	BalAcc	Activating	Deactivating	Resistance	Neutral
2-way	Activating vs Deactivating	AVG	0.91	0.6	0.69	0.62	0.79	0.86	178	633	0	0	0.894	0.661	0.837	0.829	37	41	0	0
		STD	0.004	0.017	0.013	0.018	0.016	0.008
	Activating vs Neutral	AVG	0.91	0.64	0.83	0.85	0.81	0.82	178	0	0	147	0.796	0.378	0.528	0.718	37	0	0	150
		STD	0.007	0.021	0.009	0.011	0.013	0.017
	Deactivating vs Neutral	AVG	0.97	0.75	0.95	0.96	0.95	0.81	0	633	0	147	0.917	0.601	0.686	0.845	0	41	0	150
		STD	0.003	0.011	0.003	0.003	0.005	0.012
	(Activating,Deactivating) vs Neutral	AVG	0.95	0.66	0.94	0.96	0.93	0.76	178	633	0	147	0.856	0.544	0.719	0.784	37	41	0	150
		STD	0.003	0.016	0.003	0.003	0.004	0.016
	(Activating,Deactivating,Resistance) vs Neutral	AVG	0.94	0.64	0.94	0.96	0.92	0.79	178	633	72	147	0.852	0.551	0.775	0.775	37	41	52	150
		STD	0.003	0.015	0.003	0.003	0.004	0.016
	Resistance vs Neutral	AVG	0.95	0.77	0.83	0.88	0.8	0.94	0	0	72	147	0.93	0.69	0.77	0.845	0	0	52	150
		STD	0.007	0.017	0.013	0.015	0.013	0.008
3-way	Neutral vs Deactivating vs Activating*	AVG	0.92						178	633	0	147	0.869	0.469	0.706	NA	37	41	0	150
		STD	0.004
Activating	Variants that lead to constitutive activation or significant increase in kinase activity
Deactivating	Variants that lead to loss or significant decrease in kinase activity
Resistance	Variants that lead to drug-resistance
Neutral	Naturally occuring variants
Training set	Variants used for training the models
Test-set	Variants used for testing the models
*	Calculated AUC for each label, and find their average, weighted by support (the number of true instances for each label)

## Sheet: C ML results (randomization)
Table S2C: ML results during training (randomization)
Predictor type	Models	Training set
		Metrics (10-fold CV)							Count
			AUC	MCC	F1	PRE	REC	SPE	Activating	Deactivating	Resistance	Neutral
2-way	Activating vs Deactivating	AVG	0.53	0.03	0.28	0.24	0.34	0.69	178	633	0	0
		STD	0.014	0.026	0.019	0.016	0.026	0.013
	Activating vs Neutral	AVG	0.54	0.08	0.59	0.58	0.6	0.48	178	0	0	147
		STD	0.012	0.035	0.014	0.014	0.015	0.025
	Deactivating vs Neutral	AVG	0.52	0.07	0.84	0.082	0.85	0.22	0	633	0	147
		STD	0.011	0.027	0.004	0.005	0.007	0.028
	(Activating,Deactivating) vs Neutral	AVG	0.53	0.02	0.86	0.85	0.88	0.14	178	633	0	147
		STD	0.012	0.027	0.004	0.003	0.006	0.022
	(Activating,Deactivating,Resistance) vs Neutral	AVG	0.47	-0.02	0.82	0.85	0.8	0.18	178	633	72	147
		STD	0.012	0.021	0.006	0.004	0.01	0.019
	Resistance vs Neutral	AVG	0.53	0.07	0.32	0.39	0.29	0.77	0	0	72	147
		STD	0.014	0.052	0.037	0.049	0.04	0.021
3-way	Neutral vs Deactivating vs Activating*	AVG	0.54						178	633	0	147
		STD	0.004
Activating	Variants that lead to constitutive activation or significant increase in kinase activity
Deactivating	Variants that lead to loss or significant decrease in kinase activity
Resistance	Variants that lead to drug-resistance
Neutral	Naturally occuring variants
Training set	Variants used for training the models
*	Calculated AUC for each label, and find their average, weighted by support (the number of true instances for each label)

## Sheet: D Test-set
Table S2D: Predicted probabilities of Activark predictors, PolyPhen2 and PMUT on the test set.
Gene	UniProt_Acc	Mutation	MutationType	Activark					PolyPhen2	PMUT
				N	D	A	AIvLD	RvN
JAK2	O60674	H608N	Activating	0.299	0.22	0.48	0.665	0.422	0.998	0.4058
JAK2	O60674	H608Y	Activating	0.44	0.207	0.353	0.745	0.176	1	0.6641
JAK2	O60674	L604F	Activating	0.493	0.227	0.28	0.548	0.767	0.998	0.2704
PAK4	O96013	I417T	Activating	0.294	0.357	0.348	0.551	0.486	0.994	0.7833
EGFR	P00533	R776L	Activating	0.045	0.083	0.872	0.795	0.936	1	0.8732
EGFR	P00533	S645C	Activating	NA	NA	NA	NA	NA	0.999	0.7094
MET	P08581	Y1234E	Activating	0.009	0.071	0.92	0.958	0.941	1	NA
KIT	P10721	K509I	Activating	NA	NA	NA	NA	NA	1	0.6164
FGFR1	P11362	D647N	Activating	0.032	0.021	0.947	0.95	0.983	1	0.5541
BRAF	P15056	L525R	Activating	0.252	0.338	0.409	0.563	0.8	0.76	0.7118
BRAF	P15056	L597R	Activating	0.03	0.566	0.403	0.528	0.824	1	0.8915
BRAF	P15056	V600G	Activating	0.007	0.007	0.986	0.985	0.993	0.98	0.804
PDGFRA	P16234	D842N	Activating	0.023	0.015	0.962	0.965	0.983	1	0.7134
FGFR2	P21802	K659E	Activating	0.023	0.06	0.917	0.931	0.611	0.999	0.7923
FGFR2	P21802	K659Q	Activating	0.113	0.072	0.815	0.899	0.422	0.999	0.6614
FGFR2	P21802	K659T	Activating	0.039	0.104	0.856	0.892	0.758	0.998	0.6724
FGFR2	P21802	Y375C	Activating	NA	NA	NA	NA	NA	0.998	0.8519
FGFR3	P22607	N540K	Activating	0.061	0.045	0.893	0.904	0.967	1	0.4387
FGFR3	P22607	S249C	Activating	NA	NA	NA	NA	NA	1	0.8989
MAPK1	P28482	E322K	Activating	0.174	0.42	0.406	0.63	0.453	1	0.855
AXL	P30530	W451C	Activating	NA	NA	NA	NA	NA	1	0.727
CDK6	Q00534	R31C	Activating	0.188	0.175	0.637	0.74	0.196	0.999	0.5793
ACVR1	Q04771	G328R	Activating	0.325	0.254	0.421	0.635	0.439	1	0.7338
ERBB4	Q15303	E715K	Activating	0.233	0.182	0.585	0.694	0.157	0.163	0.7652
ERBB4	Q15303	R687K	Activating	NA	NA	NA	NA	NA	0.671	0.4732
TNNI3K	Q59H18	H592Y	Activating	0.234	0.574	0.192	0.259	0.206	0.652	0.4322
TNNI3K	Q59H18	I512T	Activating	0.089	0.188	0.724	0.678	0.777	1	0.418
LRRK2	Q5S007	F1700L	Activating	NA	NA	NA	NA	NA	0.964	0.3178
KSR1	Q8IVT5	S406A	Activating	NA	NA	NA	NA	NA	NA	NA
MARK4	Q96L34	F202L	Activating	0.074	0.309	0.617	0.627	0.574	1	0.4164
ALPK1	Q96QP1	T237M	Activating	NA	NA	NA	NA	NA	1	NA
ALPK1	Q96QP1	V1092A	Activating	NA	NA	NA	NA	NA	0.999	NA
PINK1	Q9BXM7	G411A	Activating	0.731	0.159	0.11	0.495	0.065	0.059	0.0977
PINK1	Q9BXM7	W403A	Activating	0.542	0.219	0.239	0.338	0.195	0.06	0.5516
WNK3	Q9BYP7	E314A	Activating	0.185	0.296	0.519	0.738	0.464	1	0.8814
WNK3	Q9BYP7	E314Q	Activating	0.235	0.219	0.546	0.787	0.321	1	0.7936
TBK1	Q9UHD2	R573G	Activating	NA	NA	NA	NA	NA	1	0.4085
TBK1	Q9UHD2	S511E	Activating	NA	NA	NA	NA	NA	0.214	0.1879
ALK	Q9UM73	I1171S	Activating	0.301	0.291	0.408	0.539	0.772	1	0.5671
WNK2	Q9Y3S1	A1607V	Activating	NA	NA	NA	NA	NA	0.995	NA
WNK2	Q9Y3S1	P702L	Activating	NA	NA	NA	NA	NA	0.993	NA
WNK2	Q9Y3S1	V2053I	Activating	NA	NA	NA	NA	NA	0.999	NA
FGFR4	P22455	C477A	Activating	0.602	0.114	0.284	0.782	0.372	1	0.4458
FGFR4	P22455	C552A	Activating	0.231	0.245	0.524	0.626	0.972	0.911	0.61
RAF1	P04049	R231Q	Activating	NA	NA	NA	NA	NA	0.298	0.2594
PDGFRB	P09619	N666S	Activating	0.055	0.057	0.888	0.909	0.984	1	0.7797
TRIB3	Q96RU7	Q84R	Activating	NA	NA	NA	NA	NA	0	NA
MAP3K3	Q99759	I441M	Activating	0.438	0.297	0.265	0.59	0.355	1	NA
MAPK1	P28482	D321N	Activating	0.411	0.263	0.326	0.469	0.423	0.999	0.683
EGFR	P00533	V774M	Activating	0.622	0.152	0.225	0.523	0.318	1	0.8692
PDGFRB	P09619	N666K	Activating	0.06	0.053	0.888	0.909	0.977	1	0.556
FGFR2	P21802	P253R	Activating	NA	NA	NA	NA	NA	0.134	0.6995
MAP2K1	Q02750	N122D	Activating	0.716	0.178	0.106	0.378	0.63	0.97	0.1125
MAP2K1	Q02750	N345K	Activating	0.452	0.106	0.441	0.746	0.188	0.483	0.2082
MAP2K1	Q02750	P124Q	Activating	0.439	0.142	0.419	0.693	0.466	1	0.2536
JAK2	O60674	V617L	Activating	0.521	0.084	0.395	0.854	0.098	0.083	0.2816
RET	P07949	C630Y	Activating	NA	NA	NA	NA	NA	0.999	0.6906
ROS1	P08922	D2113N	Activating	0.221	0.399	0.38	0.566	0.294	0.999	0.7165
PDGFRB	P09619	S548Y	Activating	NA	NA	NA	NA	NA	0.982	0.6767
ALK	Q9UM73	D1225N	Activating	0.724	0.118	0.158	0.636	0.245	1	0.4569
BRAF	P15056	V600R	Activating	0.007	0.007	0.986	0.989	0.995	0.55	0.8748
FGFR2	P21802	S252W	Activating	NA	NA	NA	NA	NA	0.999	0.9054
FGFR3	P22607	N262Q	Activating	NA	NA	NA	NA	NA	0.999	0.6813
BMPR1B	O00238	E244K	Deactivating	0.157	0.654	0.19	0.117	0.396	1	0.8783
MAP3K7	O43318	T187I	Deactivating	0.166	0.346	0.488	0.378	0.318	0.988	0.607
ULK1	O75385	S467A	Deactivating	NA	NA	NA	NA	NA	0.072	0.366
MAP4K4	O95819	K54R	Deactivating	0.015	0.96	0.025	0.04	0.517	0.955	NA
CHEK2	O96017	E321A	Deactivating	0.076	0.175	0.749	0.702	0.408	1	0.9373
CHEK2	O96017	T476M	Deactivating	0.518	0.331	0.151	0.261	0.197	1	0.8967
RAF1	P04049	T543M	Deactivating	0.111	0.403	0.486	0.539	0.411	0.997	0.743
LCK	P06239	P440S	Deactivating	0.256	0.534	0.21	0.39	0.566	0.996	NA
RET	P07949	S811F	Deactivating	0.071	0.659	0.269	0.389	0.972	1	0.9211
MET	P08581	S1016A	Deactivating	NA	NA	NA	NA	NA	0.986	NA
FGFR1	P11362	E670K	Deactivating	0.025	0.924	0.05	0.077	0.584	1	0.9212
BRAF	P15056	D594G	Deactivating	0.03	0.914	0.056	0.117	0.722	0.999	0.8915
BRAF	P15056	D594N	Deactivating	0.042	0.892	0.067	0.135	0.683	1	0.8875
NPR2	P20594	G123V	Deactivating	NA	NA	NA	NA	NA	0.735	0.5464
NPR2	P20594	L314R	Deactivating	NA	NA	NA	NA	NA	0	0.2328
NPR2	P20594	L51P	Deactivating	NA	NA	NA	NA	NA	0.975	0.8112
NPR2	P20594	R388Q	Deactivating	NA	NA	NA	NA	NA	1	0.8139
NPR2	P20594	R932C	Deactivating	NA	NA	NA	NA	NA	0.958	0.5868
EPHA1	P21709	P460L	Deactivating	NA	NA	NA	NA	NA	0.999	0.5071
JAK1	P23458	V666G	Deactivating	NA	NA	NA	NA	NA	1	0.2617
EPHA2	P29317	P817H	Deactivating	0.259	0.437	0.304	0.438	0.572	0.999	0.8915
EPHB2	P29323	S706F	Deactivating	0.084	0.695	0.221	0.315	0.96	0.996	NA
AKT1	P31749	G159V	Deactivating	0.034	0.855	0.111	0.16	0.757	0.943	0.8986
AKT1	P31749	G336D	Deactivating	0.196	0.543	0.261	0.239	0.236	1	0.8986
AKT1	P31749	H265Y	Deactivating	0.126	0.702	0.172	0.325	0.337	0.988	0.8986
AKT1	P31749	R273Q	Deactivating	0.057	0.462	0.481	0.558	0.282	0.998	0.8986
AKT2	P31751	P50T	Deactivating	NA	NA	NA	NA	NA	0.001	0.2746
ACVRL1	P37023	I256N	Deactivating	0.123	0.678	0.199	0.318	0.694	1	0.9403
ACVRL1	P37023	L285P	Deactivating	0.045	0.904	0.051	0.094	0.673	1	0.9403
ACVRL1	P37023	P424L	Deactivating	0.475	0.418	0.107	0.268	0.311	1	0.9403
ACVRL1	P37023	R67Q	Deactivating	NA	NA	NA	NA	NA	0.154	0.31
ZAP70	P43403	D521N	Deactivating	0.27	0.551	0.18	0.216	0.513	1	0.8693
ZAP70	P43403	W163C	Deactivating	NA	NA	NA	NA	NA	1	0.8915
GSK3B	P49841	Y216E	Deactivating	0.014	0.671	0.315	0.246	0.348	1	0.6299
GSK3B	P49841	Y216F	Deactivating	0.005	0.891	0.104	0.08	0.585	1	0.9048
MAPK12	P53778	D171A	Deactivating	0.021	0.949	0.03	0.042	0.561	1	0.7865
CDK6	Q00534	K43M	Deactivating	0.008	0.98	0.012	0.017	0.533	1	0.855
MAP2K1	Q02750	K97M	Deactivating	0.007	0.981	0.013	0.023	0.44	1	0.7749
GUCY2D	Q02846	R838S	Deactivating	NA	NA	NA	NA	NA	1	0.7754
PRKCD	Q05655	G510S	Deactivating	0.249	0.479	0.272	0.456	0.469	1	NA
ATM	Q13315	N358I	Deactivating	NA	NA	NA	NA	NA	0.017	NA
ATM	Q13315	N796H	Deactivating	NA	NA	NA	NA	NA	0.985	NA
RIPK1	Q13546	D138N	Deactivating	0.04	0.767	0.193	0.185	0.754	0.999	0.8555
BMPR2	Q13873	Q721R	Deactivating	NA	NA	NA	NA	NA	0.201	0.1988
PDK1	Q15118	G380D	Deactivating	NA	NA	NA	NA	NA	1	NA
TNNI3K	Q59H18	P742L	Deactivating	0.693	0.15	0.157	0.626	0.232	0.906	0.2822
LRRK2	Q5S007	W1295A	Deactivating	NA	NA	NA	NA	NA	1	0.5654
STRADA	Q7RTN6	S264R	Deactivating	0.127	0.701	0.171	0.221	0.54	1	NA
ACVR1C	Q8NER5	I195T	Deactivating	0.26	0.461	0.279	0.518	0.285	0.997	0.725
ACVR1C	Q8NER5	N150H	Deactivating	NA	NA	NA	NA	NA	0.003	0.2184
WNK4	Q96J92	D321A	Deactivating	0.016	0.963	0.021	0.027	0.531	1	NA
TP53RK	Q96S44	R249G	Deactivating	NA	NA	NA	NA	NA	1	NA
PINK1	Q9BXM7	G409V	Deactivating	0.124	0.737	0.139	0.217	0.602	1	0.9074
IRAK4	Q9NWZ3	D320Y	Deactivating	0.256	0.49	0.254	0.355	0.566	1	0.8606
IRAK4	Q9NWZ3	Q29P	Deactivating	NA	NA	NA	NA	NA	0.109	0.2551
TBK1	Q9UHD2	S511A	Deactivating	NA	NA	NA	NA	NA	0.012	0.1969
TLK1	Q9UKI8	M566T	Deactivating	0.116	0.304	0.58	0.658	0.387	0.997	NA
TLK1	Q9UKI8	Q479E	Deactivating	0.298	0.164	0.538	0.808	0.164	0.886	NA
ALK	Q9UM73	F1174S	Deactivating	0.253	0.395	0.352	0.562	0.945	1	0.8396
TNNI3K	Q59H18	L577F	Deactivating	0.136	0.422	0.442	0.444	0.902	1	0.6574
EGFR	P00533	Y891D	Deactivating	0.051	0.6	0.35	0.425	0.621	1	0.8732
KIT	P10721	P665L	Deactivating	0.52	0.25	0.23	0.495	0.405	1	0.9181
ZAP70	P43403	R170C	Deactivating	NA	NA	NA	NA	NA	1	0.8758
ERBB4	Q15303	N706D	Deactivating	0.187	0.392	0.422	0.557	0.456	0.997	0.3973
ROCK2	O75116	K1007R	Deactivating	NA	NA	NA	NA	NA	0.006	NA
JAK2	O60674	G993A	Resistance	0.708	0.074	0.218	0.677	0.272	1	0.2969
EGFR	P00533	G724S	Resistance	0.137	0.298	0.566	0.664	0.681	1	0.8526
EGFR	P00533	L718M	Resistance	0.526	0.123	0.351	0.58	0.787	1	0.7844
EGFR	P00533	N540K	Resistance	NA	NA	NA	NA	NA	0.989	0.78
ERBB2	P04626	L755S	Resistance	0.193	0.348	0.459	0.607	0.843	1	0.8566
ERBB2	P04626	R784G	Resistance	0.053	0.098	0.848	0.798	0.907	1	0.8732
CSF1R	P07333	G795A	Resistance	0.591	0.124	0.285	0.67	0.479	0.986	0.2617
RET	P07949	G810C	Resistance	0.205	0.28	0.516	0.563	0.848	1	0.9212
RET	P07949	G810D	Resistance	0.137	0.261	0.603	0.482	0.923	1	0.9212
RET	P07949	G810R	Resistance	0.184	0.287	0.53	0.435	0.901	1	0.9212
RET	P07949	G810S	Resistance	0.205	0.269	0.526	0.563	0.923	1	0.9172
MET	P08581	F1200I	Resistance	0.251	0.39	0.36	0.461	0.547	1	NA
MET	P08581	F1200L	Resistance	0.245	0.457	0.298	0.345	0.574	1	NA
MET	P08581	G1163R	Resistance	0.2	0.26	0.54	0.458	0.823	1	NA
MET	P08581	L1195V	Resistance	0.168	0.338	0.494	0.554	0.876	0.998	NA
MET	P08581	M1250T	Resistance	0.161	0.489	0.351	0.427	0.436	0.999	NA
ROS1	P08922	D1988N	Resistance	0.577	0.23	0.194	0.578	0.19	0.993	0.5553
ROS1	P08922	D2033N	Resistance	0.302	0.322	0.376	0.42	0.959	0.996	0.2895
ROS1	P08922	F2004V	Resistance	0.284	0.419	0.297	0.488	0.82	1	0.7188
ROS1	P08922	G1957A	Resistance	0.109	0.681	0.209	0.35	0.274	0.998	0.8624
ROS1	P08922	G2032R	Resistance	0.211	0.237	0.552	0.482	0.786	1	0.8733
ROS1	P08922	L1982V	Resistance	0.184	0.401	0.415	0.621	0.706	0.989	0.3726
ROS1	P08922	L2010M	Resistance	0.547	0.088	0.365	0.738	0.234	1	0.212
ROS1	P08922	L2026M	Resistance	0.8	0.03	0.17	0.563	0.956	1	0.203
ROS1	P08922	L2086F	Resistance	0.454	0.309	0.237	0.329	0.387	1	0.8693
ROS1	P08922	S1986F	Resistance	0.284	0.415	0.302	0.504	0.805	0.999	0.298
ROS1	P08922	S1986Y	Resistance	0.293	0.376	0.331	0.576	0.83	0.999	0.2137
KIT	P10721	N828K	Resistance	0.424	0.272	0.304	0.472	0.403	1	0.6336
KIT	P10721	V560G	Resistance	0.106	0.717	0.177	0.374	0.523	0.888	0.5873
BRAF	P15056	K601E	Resistance	0.044	0.072	0.884	0.844	0.587	0.913	0.3449
ERBB3	P21860	G337R	Resistance	NA	NA	NA	NA	NA	0.976	0.6342
FGFR4	P22455	N535K	Resistance	0.072	0.046	0.882	0.904	0.967	1	0.4202
FGFR3	P22607	M528I	Resistance	0.2	0.058	0.742	0.842	0.699	0.975	0.3191
FGFR3	P22607	V553M	Resistance	0.83	0.058	0.112	0.669	0.125	1	0.3491
FGFR3	P22607	V555M	Resistance	0.7	0.057	0.243	0.782	0.954	0.999	0.3323
FLT3	P36888	D698N	Resistance	0.606	0.11	0.284	0.613	0.928	0.516	0.3062
FLT3	P36888	N676K	Resistance	0.051	0.052	0.897	0.909	0.979	1	0.5537
FLT3	P36888	N701K	Resistance	0.741	0.091	0.168	0.642	0.34	0.998	0.6915
CDK9	P50750	L156F	Resistance	0.683	0.124	0.193	0.406	0.175	1	0.5803
BTK	Q06187	C481F	Resistance	0.105	0.732	0.163	0.167	0.982	0.999	0.8396
BTK	Q06187	L528W	Resistance	0.18	0.588	0.233	0.182	0.68	0.993	0.8555
BTK	Q06187	T474I	Resistance	0.226	0.265	0.509	0.518	0.949	1	0.2516
NTRK3	Q16288	F617L	Resistance	0.304	0.161	0.535	0.576	0.974	1	0.3092
NTRK3	Q16288	G623E	Resistance	0.105	0.185	0.71	0.658	0.88	1	0.8335
NTRK3	Q16288	G623R	Resistance	0.183	0.226	0.592	0.561	0.884	1	0.8335
PINK1	Q9BXM7	M318G	Resistance	0.077	0.444	0.479	0.337	0.967	0.993	0.6745
ALK	Q9UM73	D1203N	Resistance	0.635	0.121	0.245	0.548	0.876	0.865	0.2578
ALK	Q9UM73	F1174C	Resistance	0.41	0.22	0.37	0.767	0.874	1	0.5797
ALK	Q9UM73	I1171T	Resistance	0.329	0.241	0.43	0.445	0.707	1	0.5618
ALK	Q9UM73	L1256F	Resistance	0.333	0.346	0.322	0.367	0.51	1	0.8335
ALK	Q9UM73	V1180L	Resistance	0.457	0.137	0.407	0.754	0.154	0.951	0.3288
MET	P08581	L1195F	Resistance	0.164	0.316	0.521	0.535	0.86	1	NA
KIT	P10721	L783V	Resistance	0.23	0.191	0.578	0.63	0.894	0.996	0.9141
LCK	P06239	T316I	Resistance	0.228	0.215	0.557	0.533	0.95	1	NA
AURKA	O14965	S104L	Neutral	0.509	0.359	0.133	0.306	0.168	0.044	0.2093
GAK	O14976	S1168N	Neutral	NA	NA	NA	NA	NA	0.104	NA
MUSK	O15146	L629F	Neutral	0.282	0.081	0.636	0.708	0.413	0.989	0.47
MAST3	O60307	G883S	Neutral	NA	NA	NA	NA	NA	1	NA
CHEK2	O96017	E501K	Neutral	0.91	0.029	0.061	0.736	0.077	0.01	0.1775
MOS	P00540	S300P	Neutral	0.806	0.082	0.113	0.621	0.086	0.873	NA
FGR	P09769	S130R	Neutral	NA	NA	NA	NA	NA	0.607	0.7255
MAK	P20794	N384S	Neutral	NA	NA	NA	NA	NA	0	0.3546
EPHA5	P54756	S235A	Neutral	NA	NA	NA	NA	NA	0.009	0.2602
CDKL1	Q00532	L67P	Neutral	0.057	0.392	0.551	0.568	0.65	0.993	0.7199
TEK	Q02763	L634F	Neutral	NA	NA	NA	NA	NA	0.001	0.4045
RNASEL	Q05823	S406F	Neutral	0.24	0.425	0.335	0.402	0.5	0.993	0.6682
ATM	Q13315	S788R	Neutral	NA	NA	NA	NA	NA	0.068	NA
PKN2	Q16513	A197E	Neutral	NA	NA	NA	NA	NA	1	0.2517
TNNI3K	Q59H18	D151H	Neutral	NA	NA	NA	NA	NA	0.026	0.2682
CDKL4	Q5MAI5	R307C	Neutral	0.43	0.247	0.323	0.492	0.125	0.001	0.4517
TTBK2	Q6IQ55	E842G	Neutral	NA	NA	NA	NA	NA	0.877	0.2073
ALPK2	Q86TB3	A29V	Neutral	NA	NA	NA	NA	NA	0.022	NA
VRK2	Q86Y07	I157M	Neutral	0.262	0.169	0.57	0.671	0.707	0.975	0.158
VRK2	Q86Y07	N211S	Neutral	0.193	0.581	0.226	0.332	0.283	0.93	0.2869
MAPKAPK5	Q8IW41	M67I	Neutral	0.704	0.132	0.164	0.479	0.263	0.176	0.1844
MYO3A	Q8NEV4	V1195A	Neutral	NA	NA	NA	NA	NA	0	0.1349
TRPM7	Q96QT4	A1254V	Neutral	NA	NA	NA	NA	NA	0.4	NA
PASK	Q96RG2	T512A	Neutral	NA	NA	NA	NA	NA	0	0.0467
RIOK2	Q9BVS4	R155H	Neutral	NA	NA	NA	NA	NA	1	NA
STK31	Q9BXU1	T987S	Neutral	NA	NA	NA	NA	NA	0.013	NA
POMK	Q9H5K3	M301T	Neutral	NA	NA	NA	NA	NA	0.063	0.5226
EIF2AK4	Q9P2K8	Q1406H	Neutral	NA	NA	NA	NA	NA	0.077	0.2982
MAP3K2	Q9Y2U5	I110V	Neutral	NA	NA	NA	NA	NA	0	NA
IRAK3	Q9Y616	S288L	Neutral	0.528	0.203	0.269	0.688	0.172	0.968	NA

## Sheet: E Other-methods
Table S2E: Comparison with other methods
Method	AUC on 10-fold-CV
	Activating vs Deactivating	Resistance vs Neutral	Neutral vs Deactivating vs Activating*
GradientBoostClassifier	0.91	0.95	0.92
RandomForest	0.89	0.94	0.89
Gaussian Naive Bayes	0.69	0.84	0.76
SupportVectorClassifier	0.87	0.05	0.87
Neural Network (Multi-layer Perceptron Classifier)	0.84	0.93	0.86
Ensemble of the above methods	0.9	0.95	0.88
AUC	Area under the curve
Activating	Variants that lead to constitutive activation or significant increase in kinase activity
Deactivating	Variants that lead to loss or significant decrease in kinase activity
Resistance	Variants that lead to drug-resistance
Neutral	Naturally occuring variants
Test-set	Variants known to be both activating and resistance causing
*	Calculated AUC for each label, and took their average, weighted by support (the number of true instances for each label)
