# Supplementary material for: Discriminating activating, deactivating and resistance variants in protein kinases
Source: Research Square preprint supplement (doi:10.21203/rs.3.rs-5001235/v1), 2024-09-30
Supplement: Supplementary file 4 [file e940d40d3a3885efba67f625.xlsx]

## Sheet: A COSMIC
Table S3A: Prediction results of the predictors on somatic variants in the COSMIC dataset
UserInput	UniProtAcc	GeneName	UniProtID	Mutation	HMMpos	Region	PTM	KnownADR	NeighSites	N	D	A	AILDRvN	AILDvN	AIvNLD	AIvN	LDvNAI	LDvN	AIvLD	RvN	CosmicCount	GeneRole
P15056/V600E	P15056	BRAF	BRAF_HUMAN	V600E	491	A-loop	-	activating,resistance	FGLATvSRWSG	0.042	0.108	0.851	0.898	0.821	0.958	0.878	0.174	0.509	0.903	0.857	53122	oncogene, fusion
O60674/V617F	O60674	JAK2	JAK2_HUMAN	V617F	187	β4/β5-loop	-	activating	NYGVCvGDENI	0.321	0.22	0.459	0.484	0.435	0.583	0.498	0.334	0.345	0.69	0.411	48958	oncogene, fusion
P00533/L858R	P00533	EGFR	EGFR_HUMAN	L858R	482	A-loop	-	activating	ITDFGlKLLGA	0.122	0.366	0.512	0.865	0.834	0.606	0.786	0.47	0.744	0.551	0.639	10697	oncogene
P10721/D816V	P10721	KIT	KIT_HUMAN	D816V	491	A-loop	-	activating	FGLARdKNDSN	0.025	0.025	0.95	0.928	0.898	0.965	0.958	0.097	0.653	0.963	0.933	1721	oncogene
P00533/T790M	P00533	EGFR	EGFR_HUMAN	T790M	233	β5	-	increase,resistance	TVQLItLMPFG	0.409	0.223	0.368	0.66	0.378	0.472	0.409	0.331	0.327	0.596	0.788	1529	oncogene
P15056/V600K	P15056	BRAF	BRAF_HUMAN	V600K	491	A-loop	-	activating	FGLATvSRWSG	0.055	0.047	0.898	0.896	0.876	0.958	0.906	0.143	0.472	0.958	0.865	1241	oncogene, fusion
P07949/M918T	P07949	RET	RET_HUMAN	M918T	541	A-loop	-	-	IPVKWmIESLF	0.152	0.53	0.317	0.658	0.656	0.457	0.591	0.59	0.666	0.413	0.578	855	oncogene, fusion
P16234/D842V	P16234	PDGFRA	PGFRA_HUMAN	D842V	491	A-loop	-	activating,resistance	FGLARdMHDSN	0.032	0.031	0.937	0.934	0.892	0.966	0.954	0.11	0.638	0.957	0.93	605	oncogene, fusion
P36888/D835Y	P36888	FLT3	FLT3_HUMAN	D835Y	491	A-loop	-	activating,resistance	FGLARdMSDSN	0.017	0.029	0.954	0.919	0.924	0.969	0.95	0.107	0.648	0.949	0.946	486	oncogene
P00533/L861Q	P00533	EGFR	EGFR_HUMAN	L861Q	491	A-loop	-	activating	FGLAKlGAEEK	0.047	0.068	0.885	0.876	0.775	0.928	0.89	0.133	0.5	0.944	0.862	424	oncogene
P00519/T315I	P00519	ABL1	ABL1_HUMAN	T315I	233	β5	-	resistance	PFYIItFMTYG	0.195	0.442	0.364	0.728	0.672	0.524	0.66	0.492	0.661	0.579	0.835	356	oncogene, fusion
P10721/V654A	P10721	KIT	KIT_HUMAN	V654A	179	αC/β4-loop	-	resistance	NHMNIvLLGAC	0.196	0.36	0.445	0.631	0.608	0.537	0.57	0.457	0.582	0.542	0.648	296	oncogene
P00533/S768I	P00533	EGFR	EGFR_HUMAN	S768I	156	αC/β4-loop	p	activating	AYVMAsDNPHV	0.126	0.285	0.589	0.787	0.732	0.64	0.71	0.33	0.658	0.703	0.539	282	oncogene
P15056/K601E	P15056	BRAF	BRAF_HUMAN	K601E	492	A-loop	ac	-	GLATVkRWSGS	0.167	0.278	0.555	0.707	0.705	0.62	0.771	0.366	0.644	0.699	0.506	275	oncogene, fusion
P10721/L576P	P10721	KIT	KIT_HUMAN	L576P	18	N-term-β1	-	activating	IDPTQlYDHKW	0.147	0.496	0.357	0.795	0.782	0.501	0.634	0.567	0.782	0.543	0.659	274	oncogene
P10721/V559D	P10721	KIT	KIT_HUMAN	V559D	1	N-term-β1	-	-	EVQWKvEEING	0.186	0.418	0.396	0.791	0.724	0.482	0.685	0.477	0.753	0.431	0.679	268	oncogene
P10721/N822K	P10721	KIT	KIT_HUMAN	N822K	507	A-loop	-	activating,resistance	IKNDSnVVKGN	0.188	0.258	0.555	0.724	0.699	0.751	0.759	0.291	0.591	0.765	0.556	260	oncogene
P00533/G719A	P00533	EGFR	EGFR_HUMAN	G719A	38	β1;Gly-rich-loop	-	resistance	KIKVLgGAFGT	0.147	0.306	0.547	0.802	0.73	0.555	0.734	0.454	0.626	0.6	0.666	230	oncogene
P10721/V560D	P10721	KIT	KIT_HUMAN	V560D	2	N-term-β1	-	-	VQWKVvEINGN	0.165	0.48	0.355	0.74	0.729	0.512	0.605	0.514	0.703	0.456	0.601	211	oncogene
P00533/G719S	P00533	EGFR	EGFR_HUMAN	G719S	38	β1;Gly-rich-loop	-	activating	KIKVLgGAFGT	0.131	0.307	0.561	0.782	0.766	0.592	0.767	0.476	0.719	0.598	0.666	176	oncogene
P15056/D594G	P15056	BRAF	BRAF_HUMAN	D594G	479	A-loop;DFG-motif	-	-	TVKIGdGLATV	0.02	0.936	0.044	0.956	0.943	0.116	0.638	0.919	0.918	0.106	0.654	175	oncogene, fusion
P04626/L755S	P04626	ERBB2	ERBB2_HUMAN	L755S	98	β3	-	-	VAIKVlENTSP	0.248	0.36	0.392	0.714	0.699	0.529	0.621	0.463	0.644	0.516	0.676	168	oncogene, fusion
P10721/K642E	P10721	KIT	KIT_HUMAN	K642E	151	αC	-	resistance	LMSELkLSYLG	0.332	0.269	0.399	0.519	0.442	0.462	0.481	0.346	0.366	0.636	0.507	167	oncogene
P15056/G469A	P15056	BRAF	BRAF_HUMAN	G469A	43	Gly-rich-loop;β2	-	increase	GSGSFgVYKGK	0.156	0.275	0.568	0.74	0.703	0.604	0.701	0.377	0.634	0.6	0.526	146	oncogene, fusion
Q9UM73/F1174L	Q9UM73	ALK	ALK_HUMAN	F1174L	159	αC/β4-loop	-	activating,resistance	LIISKfHQNIV	0.475	0.147	0.377	0.378	0.309	0.566	0.47	0.252	0.263	0.702	0.507	144	oncogene, fusion
P04626/V777L	P04626	ERBB2	ERBB2_HUMAN	V777L	159	αC/β4-loop	-	-	YVMAGvSPYVS	0.396	0.204	0.401	0.435	0.38	0.565	0.499	0.311	0.252	0.654	0.535	138	oncogene, fusion
O96017/K373E	O96017	CHEK2	CHK2_HUMAN	K373E	485	A-loop	-	-	DFGHSkLGETS	0.182	0.25	0.568	0.684	0.713	0.621	0.747	0.408	0.728	0.649	0.462	125	TSG
P10721/D816H	P10721	KIT	KIT_HUMAN	D816H	491	A-loop	-	activating,resistance	FGLARdKNDSN	0.037	0.046	0.917	0.901	0.862	0.963	0.954	0.113	0.481	0.93	0.917	119	oncogene
P15056/V600R	P15056	BRAF	BRAF_HUMAN	V600R	491	A-loop	-	-	FGLATvSRWSG	0.034	0.056	0.91	0.899	0.879	0.972	0.917	0.147	0.523	0.954	0.891	113	oncogene, fusion
P36888/D835V	P36888	FLT3	FLT3_HUMAN	D835V	491	A-loop	-	activating,resistance	FGLARdMSDSN	0.028	0.027	0.945	0.93	0.903	0.957	0.945	0.097	0.635	0.94	0.93	113	oncogene
Q9UM73/R1275Q	Q9UM73	ALK	ALK_HUMAN	R1275Q	485	A-loop	-	activating	DFGMArIYRAS	0.138	0.289	0.573	0.753	0.749	0.627	0.774	0.405	0.793	0.584	0.463	109	oncogene, fusion
O60674/R683G	O60674	JAK2	JAK2_HUMAN	R683G	439	Catalytic-loop	-	activating	NILLIrEDRKT	0.291	0.253	0.456	0.557	0.451	0.56	0.5	0.319	0.422	0.657	0.356	105	oncogene, fusion
P22607/K650E	P22607	FGFR3	FGFR3_HUMAN	K650E	525	A-loop	-	activating	LDYYKkTNGRL	0.06	0.114	0.825	0.81	0.803	0.838	0.899	0.195	0.599	0.857	0.546	105	oncogene, fusion
P00533/G719C	P00533	EGFR	EGFR_HUMAN	G719C	38	β1;Gly-rich-loop	-	-	KIKVLgGAFGT	0.099	0.433	0.468	0.821	0.8	0.542	0.723	0.507	0.743	0.546	0.671	100	oncogene
P15056/D594N	P15056	BRAF	BRAF_HUMAN	D594N	479	A-loop;DFG-motif	-	-	TVKIGdGLATV	0.028	0.909	0.063	0.937	0.95	0.134	0.615	0.897	0.918	0.104	0.611	100	oncogene, fusion
P05771/D427N	P05771	PRKCB	KPCB_HUMAN	D427N	241	β5/αD-loop	-	-	YVNGGdMYHIQ	0.213	0.407	0.38	0.669	0.609	0.503	0.617	0.418	0.527	0.551	0.764	98	inconclusive
P04626/V842I	P04626	ERBB2	ERBB2_HUMAN	V842I	419	Catalytic-loop	-	-	EDVRLvRDLAA	0.802	0.071	0.127	0.173	0.135	0.391	0.202	0.202	0.109	0.601	0.174	93	oncogene, fusion
P22607/K650M	P22607	FGFR3	FGFR3_HUMAN	K650M	525	A-loop	-	activating	LDYYKkTNGRL	0.044	0.154	0.802	0.848	0.884	0.795	0.914	0.292	0.703	0.782	0.64	93	oncogene, fusion
P10721/Y823D	P10721	KIT	KIT_HUMAN	Y823D	508	A-loop	p	resistance	KNDSNyVKGNA	0.072	0.453	0.476	0.917	0.914	0.514	0.855	0.591	0.897	0.482	0.693	91	oncogene
P52333/M511I	P52333	JAK3	JAK3_HUMAN	M511I	21	N-term-β1	-	-	YQLSQmFHKIP	0.311	0.295	0.394	0.532	0.545	0.498	0.486	0.347	0.382	0.579	0.415	91	oncogene
P00519/F317L	P00519	ABL1	ABL1_HUMAN	F317L	235	β5/αD-loop	-	resistance	YIITEfTYGNL	0.22	0.304	0.476	0.755	0.616	0.553	0.626	0.408	0.508	0.644	0.812	90	oncogene, fusion
P10721/V559A	P10721	KIT	KIT_HUMAN	V559A	1	N-term-β1	-	-	EVQWKvEEING	0.417	0.311	0.272	0.585	0.535	0.42	0.492	0.407	0.57	0.424	0.495	87	oncogene
P36888/D835E	P36888	FLT3	FLT3_HUMAN	D835E	491	A-loop	-	activating	FGLARdMSDSN	0.021	0.048	0.931	0.9	0.847	0.964	0.891	0.085	0.459	0.943	0.91	86	oncogene
P36888/D835H	P36888	FLT3	FLT3_HUMAN	D835H	491	A-loop	-	activating,resistance	FGLARdMSDSN	0.02	0.039	0.941	0.9	0.877	0.971	0.964	0.12	0.508	0.945	0.931	85	oncogene
P10721/D816Y	P10721	KIT	KIT_HUMAN	D816Y	491	A-loop	-	activating	FGLARdKNDSN	0.016	0.03	0.954	0.919	0.918	0.97	0.959	0.092	0.626	0.963	0.945	82	oncogene
P15056/V600M	P15056	BRAF	BRAF_HUMAN	V600M	491	A-loop	-	-	FGLATvSRWSG	0.14	0.082	0.779	0.835	0.743	0.95	0.83	0.121	0.334	0.94	0.789	74	oncogene, fusion
P21860/E928G	P21860	ERBB3	ERBB3_HUMAN	E928G	663	αG/αH-loop	-	-	LLEKGeLAQPQ	0.271	0.268	0.461	0.56	0.468	0.524	0.51	0.419	0.454	0.584	0.491	68	oncogene
P00533/E709K	P00533	EGFR	EGFR_HUMAN	E709K	27	N-term-β1	-	-	LRILKeEFKKI	0.345	0.284	0.372	0.563	0.45	0.539	0.514	0.402	0.494	0.643	0.308	65	oncogene
P37173/R528H	P37173	TGFBR2	TGFR2_HUMAN	R528H	832	αH/αI-loop	-	-	HDPEArTAQCV	0.126	0.652	0.222	0.729	0.752	0.307	0.556	0.649	0.738	0.313	0.452	64	TSG
P15056/G466V	P15056	BRAF	BRAF_HUMAN	G466V	40	β1;Gly-rich-loop	-	-	QRIGSgFGTVY	0.064	0.771	0.165	0.851	0.881	0.32	0.678	0.738	0.872	0.313	0.634	62	oncogene, fusion
P10721/V559G	P10721	KIT	KIT_HUMAN	V559G	1	N-term-β1	-	-	EVQWKvEEING	0.208	0.391	0.401	0.784	0.67	0.426	0.651	0.469	0.689	0.42	0.666	61	oncogene
Q02750/K57N	Q02750	MAP2K1	MP2K1_HUMAN	K57N	20	N-term-β1	ub	increase,resistance	AFLTQkKVGEL	0.183	0.292	0.525	0.718	0.705	0.562	0.731	0.357	0.533	0.6	0.48	58	oncogene
P36888/N676K	P36888	FLT3	FLT3_HUMAN	N676K	180	αC/β4-loop	-	-	HENIVnLGACT	0.133	0.16	0.707	0.735	0.615	0.749	0.781	0.245	0.375	0.801	0.791	56	oncogene
P52333/V722I	P52333	JAK3	JAK3_HUMAN	V722I	606	αF/αG-loop	-	neutral	EVFSGvMPISA	0.871	0.052	0.077	0.184	0.116	0.339	0.132	0.162	0.133	0.661	0.14	55	oncogene
P15056/G469V	P15056	BRAF	BRAF_HUMAN	G469V	43	Gly-rich-loop;β2	-	-	GSGSFgVYKGK	0.138	0.536	0.327	0.821	0.794	0.49	0.72	0.535	0.782	0.434	0.612	55	oncogene, fusion
P28482/E322K	P28482	MAPK1	MK01_HUMAN	E322K	861	C-term-αI	-	-	YDPSDeIAEAP	0.2	0.426	0.375	0.714	0.708	0.523	0.652	0.518	0.661	0.535	0.507	53	oncogene
Q02750/P124S	Q02750	MAP2K1	MP2K1_HUMAN	P124S	172	αC/β4-loop	-	resistance	HECNSpIVGFY	0.411	0.245	0.345	0.394	0.335	0.481	0.407	0.318	0.351	0.609	0.497	51	oncogene
P15056/G466E	P15056	BRAF	BRAF_HUMAN	G466E	40	β1;Gly-rich-loop	-	-	QRIGSgFGTVY	0.066	0.76	0.174	0.89	0.889	0.351	0.722	0.753	0.887	0.323	0.663	50	oncogene, fusion
Q06187/C481S	Q06187	BTK	BTK_HUMAN	C481S	241	β5/αD-loop	-	resistance	YMANGcLNYLR	0.398	0.229	0.373	0.562	0.372	0.507	0.469	0.267	0.339	0.633	0.742	49	oncogene, TSG
P10721/D820Y	P10721	KIT	KIT_HUMAN	D820Y	503	A-loop	-	resistance	RDIKNdNYVVK	0.198	0.331	0.471	0.798	0.705	0.578	0.738	0.408	0.644	0.579	0.795	49	oncogene
P04626/D769Y	P04626	ERBB2	ERBB2_HUMAN	D769Y	148	αC	-	-	NKEILdAYVMA	0.288	0.354	0.358	0.663	0.548	0.496	0.521	0.437	0.578	0.567	0.591	47	oncogene, fusion
P11309/G28D	P11309	PIM1	PIM1_HUMAN	G28D	21	N-term-β1	-	-	TKLAPgEKEPL	0.319	0.289	0.392	0.527	0.533	0.56	0.505	0.3	0.461	0.634	0.402	46	oncogene, fusion
P11362/N546K	P11362	FGFR1	FGFR1_HUMAN	N546K	180	αC/β4-loop	-	activating,resistance	HKNIInLGACT	0.246	0.125	0.629	0.682	0.496	0.736	0.645	0.185	0.285	0.826	0.658	46	oncogene, fusion
P52333/R657Q	P52333	JAK3	JAK3_HUMAN	R657Q	439	Catalytic-loop	-	-	KVLLArGADGS	0.359	0.193	0.448	0.399	0.314	0.558	0.404	0.212	0.283	0.709	0.219	45	oncogene
P10721/T670I	P10721	KIT	KIT_HUMAN	T670I	233	β5	-	resistance	PTLVItYCCYG	0.547	0.161	0.292	0.565	0.312	0.525	0.379	0.262	0.233	0.696	0.788	44	oncogene
O60674/R683S	O60674	JAK2	JAK2_HUMAN	R683S	439	Catalytic-loop	-	-	NILLIrEDRKT	0.387	0.198	0.415	0.401	0.293	0.517	0.427	0.246	0.297	0.687	0.302	44	oncogene, fusion
P10721/N822Y	P10721	KIT	KIT_HUMAN	N822Y	507	A-loop	-	resistance	IKNDSnVVKGN	0.16	0.188	0.653	0.747	0.733	0.718	0.738	0.291	0.574	0.763	0.617	43	oncogene
Q9UM73/G1202R	Q9UM73	ALK	ALK_HUMAN	G1202R	240	β5/αD-loop	-	resistance	ELMAGgLKSFL	0.141	0.48	0.379	0.769	0.689	0.453	0.62	0.509	0.673	0.508	0.77	43	oncogene, fusion
P46734/R94L	P46734	MAP2K3	MP2K3_HUMAN	R94L	97	β3	-	-	IMAVKrRATVN	0.234	0.298	0.468	0.649	0.59	0.517	0.585	0.423	0.504	0.558	0.426	42	NA
O96017/Y390C	O96017	CHEK2	CHK2_HUMAN	Y390C	540	A-loop	p	loss	CGTPTyAPEVL	0.086	0.645	0.269	0.849	0.854	0.318	0.713	0.745	0.866	0.247	0.532	40	TSG
P00533/C797S	P00533	EGFR	EGFR_HUMAN	C797S	241	β5/αD-loop	-	resistance	LMPFGcLDYVR	0.478	0.226	0.295	0.524	0.33	0.524	0.423	0.286	0.35	0.64	0.695	39	oncogene
P15056/L597R	P15056	BRAF	BRAF_HUMAN	L597R	482	A-loop	-	-	IGDFGlTVKSR	0.112	0.453	0.435	0.876	0.842	0.566	0.789	0.551	0.775	0.531	0.688	39	oncogene, fusion
P07332/E651G	P07332	FES	FES_HUMAN	E651G	256	αD/αE-loop	-	-	TFLRTeARLRV	0.546	0.164	0.29	0.337	0.319	0.49	0.329	0.253	0.243	0.656	0.255	39	oncogene, TSG
P11309/S97N	P11309	PIM1	PIM1_HUMAN	S97N	162	αC/β4-loop	-	-	LLKKVsGFSGV	0.642	0.178	0.18	0.347	0.329	0.398	0.285	0.401	0.34	0.519	0.241	38	oncogene, fusion
P15056/G469E	P15056	BRAF	BRAF_HUMAN	G469E	43	Gly-rich-loop;β2	-	-	GSGSFgVYKGK	0.063	0.686	0.251	0.878	0.822	0.419	0.743	0.662	0.841	0.382	0.65	38	oncogene, fusion
P15056/N581S	P15056	BRAF	BRAF_HUMAN	N581S	431	Catalytic-loop	-	-	DLKSNnFLHED	0.085	0.682	0.233	0.806	0.871	0.321	0.676	0.683	0.775	0.369	0.606	38	oncogene, fusion
P46734/L215W	P46734	MAP2K3	MP2K3_HUMAN	L215W	492	A-loop	-	-	GISGYlDSVAK	0.215	0.438	0.347	0.663	0.666	0.511	0.655	0.493	0.593	0.501	0.579	38	NA
P15056/K601N	P15056	BRAF	BRAF_HUMAN	K601N	492	A-loop	ac	-	GLATVkRWSGS	0.168	0.324	0.508	0.685	0.72	0.539	0.777	0.381	0.607	0.602	0.485	36	oncogene, fusion
P15056/G469R	P15056	BRAF	BRAF_HUMAN	G469R	43	Gly-rich-loop;β2	-	-	GSGSFgVYKGK	0.076	0.629	0.295	0.859	0.815	0.418	0.735	0.61	0.835	0.352	0.64	36	oncogene, fusion
Q02750/E203K	Q02750	MAP2K1	MP2K1_HUMAN	E203K	465	Catalytic-loop	-	resistance	VNSRGeKLCDF	0.349	0.317	0.333	0.55	0.49	0.507	0.446	0.382	0.371	0.562	0.547	36	oncogene
P11309/L184F	P11309	PIM1	PIM1_HUMAN	L184F	477	Catalytic-loop	-	-	RGELKlDFGSG	0.273	0.438	0.288	0.521	0.513	0.385	0.478	0.48	0.425	0.507	0.467	34	oncogene, fusion
P46734/R96W	P46734	MAP2K3	MP2K3_HUMAN	R96W	102	β3/αC-loop	-	-	AVKRIrTVNSQ	0.281	0.409	0.311	0.632	0.642	0.365	0.563	0.558	0.593	0.375	0.474	34	NA
P11309/P81S	P11309	PIM1	PIM1_HUMAN	P81S	124	αC	-	decrease	DWGELpGTRVP	0.355	0.295	0.35	0.431	0.407	0.463	0.435	0.39	0.366	0.603	0.32	33	oncogene, fusion
Q02750/Q56P	Q02750	MAP2K1	MP2K1_HUMAN	Q56P	19	N-term-β1	-	activating	EAFLTqQKVGE	0.242	0.311	0.446	0.633	0.536	0.552	0.575	0.37	0.579	0.602	0.539	33	oncogene
P27037/K315N	P27037	ACVR2A	AVR2A_HUMAN	K315N	415	Catalytic-loop	-	-	LKDGHkAISHR	0.189	0.462	0.349	0.668	0.691	0.456	0.569	0.494	0.614	0.46	0.503	33	TSG
P11309/K24N	P11309	PIM1	PIM1_HUMAN	K24N	17	N-term-β1	-	-	DLHATkAPGKE	0.54	0.236	0.224	0.404	0.364	0.454	0.342	0.363	0.35	0.606	0.275	32	oncogene, fusion
P36888/A680V	P36888	FLT3	FLT3_HUMAN	A680V	185	β4	-	-	VNLLGaTLSGP	0.384	0.24	0.376	0.446	0.412	0.501	0.467	0.352	0.362	0.578	0.444	32	oncogene
P16234/N659K	P16234	PDGFRA	PGFRA_HUMAN	N659K	180	αC/β4-loop	-	activating	HLNIVnLGACT	0.123	0.118	0.758	0.748	0.594	0.758	0.749	0.213	0.359	0.826	0.787	31	oncogene, fusion
P11362/K656E	P11362	FGFR1	FGFR1_HUMAN	K656E	525	A-loop	-	activating	IDYYKkTNGRL	0.102	0.123	0.775	0.748	0.733	0.838	0.846	0.181	0.548	0.865	0.526	31	oncogene, fusion
P11309/E135K	P11309	PIM1	PIM1_HUMAN	E135K	354	αD/αE-loop	-	-	FDFITeGALQE	0.546	0.205	0.249	0.31	0.279	0.446	0.315	0.278	0.277	0.631	0.234	30	oncogene, fusion
P15056/V600D	P15056	BRAF	BRAF_HUMAN	V600D	491	A-loop	-	-	FGLATvSRWSG	0.028	0.142	0.83	0.921	0.9	0.951	0.935	0.161	0.639	0.906	0.899	30	oncogene, fusion
P00533/L861R	P00533	EGFR	EGFR_HUMAN	L861R	491	A-loop	-	-	FGLAKlGAEEK	0.04	0.076	0.884	0.88	0.785	0.936	0.905	0.155	0.512	0.945	0.864	30	oncogene
P04626/I767M	P04626	ERBB2	ERBB2_HUMAN	I767M	146	αC	-	-	KANKEiDEAYV	0.684	0.135	0.181	0.158	0.176	0.464	0.22	0.209	0.168	0.673	0.184	30	oncogene, fusion
P11309/P33S	P11309	PIM1	PIM1_HUMAN	P33S	26	N-term-β1	-	-	GKEKEpESQYQ	0.492	0.25	0.258	0.449	0.407	0.483	0.354	0.343	0.356	0.607	0.257	29	oncogene, fusion
Q15303/R711C	Q15303	ERBB4	ERBB4_HUMAN	R711C	23	N-term-β1	-	-	NQAQLrLKETE	0.157	0.397	0.446	0.779	0.719	0.486	0.631	0.497	0.777	0.505	0.475	28	oncogene, TSG
Q9UM73/L1196M	Q9UM73	ALK	ALK_HUMAN	L1196M	233	β5	-	resistance	PRFILlLMAGG	0.696	0.122	0.182	0.547	0.253	0.464	0.278	0.251	0.187	0.687	0.782	28	oncogene, fusion
Q06418/V669L	Q06418	TYRO3	TYRO3_HUMAN	V669L	475	Catalytic-loop	-	-	AEDMTvVADFG	0.401	0.293	0.306	0.457	0.417	0.459	0.399	0.415	0.356	0.499	0.385	28	NA
P10721/V825A	P10721	KIT	KIT_HUMAN	V825A	525	A-loop	-	-	DSNYVvGNARL	0.301	0.325	0.374	0.643	0.617	0.618	0.698	0.288	0.489	0.691	0.436	27	oncogene
P52333/A573V	P52333	JAK3	JAK3_HUMAN	A573V	150	αC	-	-	SFLEAaLMSQV	0.527	0.178	0.295	0.356	0.225	0.491	0.326	0.259	0.228	0.635	0.252	27	oncogene
P10721/A829P	P10721	KIT	KIT_HUMAN	A829P	529	A-loop	-	resistance	VVKGNaLPVKW	0.08	0.559	0.361	0.923	0.899	0.516	0.8	0.605	0.857	0.447	0.588	27	oncogene
P00533/L747P	P00533	EGFR	EGFR_HUMAN	L747P	98	β3	-	resistance	VAIKElEATSP	0.163	0.476	0.361	0.822	0.798	0.476	0.644	0.616	0.756	0.45	0.724	27	oncogene
P45985/R134W	P45985	MAP2K4	MP2K4_HUMAN	R134W	102	β3/αC-loop	-	-	AVKRIrTVDEK	0.286	0.399	0.315	0.649	0.62	0.353	0.544	0.552	0.617	0.39	0.422	27	oncogene, TSG
P46734/R293H	P46734	MAP2K3	MP2K3_HUMAN	R293H	705	αG/αH-loop	-	-	QLPADrSPEFV	0.748	0.061	0.192	0.175	0.165	0.444	0.227	0.163	0.116	0.674	0.107	27	NA
P07949/A883F	P07949	RET	RET_HUMAN	A883F	435	Catalytic-loop	-	-	RNILVaGRKMK	0.274	0.394	0.332	0.6	0.616	0.461	0.516	0.49	0.591	0.546	0.463	26	oncogene, fusion
P04626/L869R	P04626	ERBB2	ERBB2_HUMAN	L869R	491	A-loop	-	resistance	FGLARlDIDET	0.042	0.073	0.885	0.886	0.825	0.934	0.902	0.162	0.501	0.943	0.873	26	oncogene, fusion
P45985/S184L	P45985	MAP2K4	MP2K4_HUMAN	S184L	241	β5/αD-loop	-	-	ELMSTsDKFYK	0.191	0.566	0.243	0.708	0.682	0.386	0.606	0.553	0.627	0.361	0.715	26	oncogene, TSG
Q02750/C121S	Q02750	MAP2K1	MP2K1_HUMAN	C121S	159	αC/β4-loop	-	resistance	QVLHEcSPYIV	0.245	0.357	0.398	0.691	0.627	0.534	0.613	0.452	0.598	0.567	0.763	26	oncogene
P35968/R1032Q	P35968	KDR	VGFR2_HUMAN	R1032Q	430	Catalytic-loop	-	-	RDLAArILLSE	0.135	0.647	0.218	0.777	0.77	0.316	0.606	0.662	0.787	0.261	0.498	26	oncogene
P00533/P848L	P00533	EGFR	EGFR_HUMAN	P848L	472	Catalytic-loop	-	-	VLVKTpHVKIT	0.3	0.307	0.393	0.546	0.563	0.552	0.507	0.418	0.485	0.576	0.511	26	oncogene
P46734/R55T	P46734	MAP2K3	MP2K3_HUMAN	R55T	20	N-term-β1	-	-	ITIGDrFEVEA	0.488	0.2	0.313	0.356	0.327	0.553	0.462	0.246	0.264	0.65	0.244	26	NA
P11309/E79D	P11309	PIM1	PIM1_HUMAN	E79D	122	αC	-	-	ISDWGePNGTR	0.652	0.115	0.233	0.221	0.172	0.548	0.3	0.207	0.128	0.699	0.212	25	oncogene, fusion
P22455/V550L	P22455	FGFR4	FGFR4_HUMAN	V550L	233	β5	-	resistance	PLYVIvCAAKG	0.602	0.135	0.263	0.558	0.295	0.5	0.302	0.249	0.227	0.692	0.811	25	oncogene
P15056/L597Q	P15056	BRAF	BRAF_HUMAN	L597Q	482	A-loop	-	-	IGDFGlTVKSR	0.131	0.439	0.43	0.865	0.848	0.587	0.791	0.531	0.737	0.552	0.708	25	oncogene, fusion
P00533/L833V	P00533	EGFR	EGFR_HUMAN	L833V	418	Catalytic-loop	-	-	LEDRRlHRDLA	0.678	0.152	0.17	0.288	0.277	0.402	0.237	0.314	0.316	0.564	0.271	25	oncogene
P10721/D820G	P10721	KIT	KIT_HUMAN	D820G	503	A-loop	-	resistance	RDIKNdNYVVK	0.312	0.254	0.435	0.674	0.608	0.615	0.687	0.358	0.513	0.675	0.745	24	oncogene
Q04771/G328V	Q04771	ACVR1	ACVR1_HUMAN	G328V	401	-	-	-	IFGTQgPAIAH	0.301	0.383	0.316	0.609	0.574	0.435	0.529	0.468	0.557	0.513	0.474	24	oncogene
P46734/A84T	P46734	MAP2K3	MP2K3_HUMAN	A84T	59	β2/β3-loop	-	-	EKVRHaSGTIM	0.796	0.052	0.151	0.136	0.139	0.474	0.149	0.134	0.133	0.639	0.144	24	NA
P11309/Q37H	P11309	PIM1	PIM1_HUMAN	Q37H	30	N-term-β1	-	-	EPLESqQVGPL	0.631	0.17	0.199	0.333	0.299	0.464	0.281	0.276	0.274	0.658	0.272	23	oncogene, fusion
P00533/L747S	P00533	EGFR	EGFR_HUMAN	L747S	98	β3	-	-	VAIKElEATSP	0.252	0.36	0.388	0.728	0.688	0.525	0.61	0.464	0.639	0.529	0.655	23	oncogene
P36888/D839G	P36888	FLT3	FLT3_HUMAN	D839G	503	A-loop	-	-	RDIMSdNYVVR	0.313	0.267	0.42	0.619	0.572	0.571	0.679	0.336	0.482	0.64	0.729	23	oncogene
P04626/T862A	P04626	ERBB2	ERBB2_HUMAN	T862A	478	Catalytic-loop	-	-	NHVKItFGLAR	0.401	0.279	0.32	0.49	0.438	0.471	0.451	0.414	0.423	0.524	0.416	23	oncogene, fusion
P21802/K659E	P21802	FGFR2	FGFR2_HUMAN	K659E	525	A-loop	-	-	IDYYKkTNGRL	0.075	0.121	0.804	0.764	0.756	0.834	0.857	0.189	0.536	0.835	0.512	23	oncogene, fusion
Q15208/V106F	Q15208	STK38	STK38_HUMAN	V106F	51	β2	-	-	GEVRLvKKDTG	0.221	0.385	0.394	0.587	0.59	0.462	0.538	0.456	0.583	0.592	0.458	23	NA
Q96RG2/H1215P	Q96RG2	PASK	PASK_HUMAN	H1215P	695	αG/αH-loop	-	-	VEAAIhPYLVS	0.541	0.185	0.274	0.331	0.292	0.523	0.382	0.261	0.257	0.665	0.303	22	NA
P37173/R528C	P37173	TGFBR2	TGFR2_HUMAN	R528C	832	αH/αI-loop	-	-	HDPEArTAQCV	0.112	0.696	0.192	0.752	0.766	0.241	0.555	0.687	0.775	0.233	0.455	22	TSG
Q04771/G328E	Q04771	ACVR1	ACVR1_HUMAN	G328E	401	-	-	-	IFGTQgPAIAH	0.238	0.315	0.447	0.588	0.544	0.52	0.572	0.396	0.504	0.595	0.45	21	oncogene
P22455/N535K	P22455	FGFR4	FGFR4_HUMAN	N535K	180	αC/β4-loop	-	-	HKNIInLGVCT	0.228	0.112	0.66	0.69	0.513	0.713	0.659	0.194	0.311	0.812	0.729	21	oncogene
Q15831/S216F	Q15831	STK11	STK11_HUMAN	S216F	536	A-loop	-	loss	RTSQGsAFQPP	0.117	0.728	0.155	0.839	0.816	0.283	0.638	0.743	0.828	0.276	0.552	21	TSG
Q9Y6R4/G1366R	Q9Y6R4	MAP3K4	M3K4_HUMAN	G1366R	83	β2/β3-loop	-	-	ISVDTgLMAMK	0.298	0.315	0.387	0.55	0.463	0.526	0.512	0.375	0.477	0.603	0.55	21	NA
Q02750/P124L	Q02750	MAP2K1	MP2K1_HUMAN	P124L	172	αC/β4-loop	-	resistance	HECNSpIVGFY	0.428	0.328	0.244	0.486	0.549	0.479	0.481	0.428	0.515	0.548	0.593	20	oncogene
P07949/R982C	P07949	RET	RET_HUMAN	R982C	816	αH	-	neutral	SEEMYrMLQCW	0.453	0.203	0.344	0.358	0.365	0.477	0.419	0.297	0.295	0.631	0.288	20	oncogene, fusion
P15056/L597S	P15056	BRAF	BRAF_HUMAN	L597S	482	A-loop	-	-	IGDFGlTVKSR	0.096	0.414	0.49	0.868	0.811	0.595	0.778	0.525	0.739	0.593	0.706	20	oncogene, fusion
Q04771/R206H	Q04771	ACVR1	ACVR1_HUMAN	R206H	28	N-term-β1	-	activating	QRTVArITLLE	0.413	0.248	0.34	0.445	0.446	0.537	0.409	0.325	0.359	0.581	0.254	20	oncogene
P15056/S467L	P15056	BRAF	BRAF_HUMAN	S467L	41	Gly-rich-loop;β1/β2-loop	p	-	RIGSGsGTVYK	0.13	0.475	0.395	0.775	0.827	0.515	0.756	0.552	0.733	0.558	0.499	20	oncogene, fusion
P00533/E709A	P00533	EGFR	EGFR_HUMAN	E709A	27	N-term-β1	-	-	LRILKeEFKKI	0.174	0.435	0.392	0.688	0.588	0.547	0.647	0.454	0.598	0.602	0.475	20	oncogene
Q02750/F53L	Q02750	MAP2K1	MP2K1_HUMAN	F53L	16	N-term-β1	-	-	KRLEAfTQKQK	0.46	0.285	0.255	0.462	0.464	0.47	0.412	0.34	0.381	0.572	0.32	20	oncogene
P08922/D2213N	P08922	ROS1	ROS1_HUMAN	D2213N	848	αI	-	neutral	FHRIQdLQLFR	0.929	0.033	0.038	0.094	0.091	0.402	0.121	0.12	0.089	0.667	0.122	20	oncogene, fusion
P15056/G464V	P15056	BRAF	BRAF_HUMAN	G464V	38	β1;Gly-rich-loop	-	increase	VGQRIgGSFGT	0.081	0.435	0.484	0.823	0.786	0.534	0.706	0.53	0.758	0.535	0.663	20	oncogene, fusion
P11309/E181D	P11309	PIM1	PIM1_HUMAN	E181D	465	Catalytic-loop	-	-	DLNRGeKLIDF	0.689	0.117	0.195	0.381	0.356	0.52	0.259	0.204	0.211	0.668	0.264	19	oncogene, fusion
P11309/V96M	P11309	PIM1	PIM1_HUMAN	V96M	159	αC/β4-loop	-	-	VLLKKvSGFSG	0.399	0.225	0.376	0.389	0.336	0.572	0.46	0.305	0.28	0.686	0.49	19	oncogene, fusion
P15056/V600G	P15056	BRAF	BRAF_HUMAN	V600G	491	A-loop	-	-	FGLATvSRWSG	0.028	0.038	0.935	0.887	0.888	0.963	0.924	0.13	0.565	0.961	0.92	19	oncogene, fusion
P00533/V774M	P00533	EGFR	EGFR_HUMAN	V774M	178	αC/β4-loop	-	-	VDNPHvRLLGI	0.695	0.12	0.185	0.279	0.254	0.421	0.264	0.221	0.22	0.645	0.305	19	oncogene
P00533/E709G	P00533	EGFR	EGFR_HUMAN	E709G	27	N-term-β1	-	activating	LRILKeEFKKI	0.287	0.344	0.37	0.657	0.587	0.563	0.663	0.449	0.586	0.597	0.519	19	oncogene
P00533/G719D	P00533	EGFR	EGFR_HUMAN	G719D	38	β1;Gly-rich-loop	-	-	KIKVLgGAFGT	0.088	0.454	0.458	0.841	0.797	0.562	0.75	0.508	0.762	0.54	0.682	19	oncogene
P21860/S846I	P21860	ERBB3	ERBB3_HUMAN	S846I	473	Catalytic-loop	-	-	LLKSPsVQVAD	0.648	0.143	0.209	0.318	0.292	0.505	0.38	0.263	0.261	0.64	0.225	19	oncogene
P37173/D446N	P37173	TGFBR2	TGFR2_HUMAN	D446N	587	αF	-	decrease	SFKQTdYSMAL	0.191	0.556	0.253	0.678	0.66	0.326	0.538	0.556	0.625	0.346	0.566	19	TSG
P11309/G83D	P11309	PIM1	PIM1_HUMAN	G83D	143	αC	-	-	GELPNgRVPME	0.407	0.277	0.317	0.366	0.32	0.542	0.38	0.283	0.325	0.685	0.367	18	oncogene, fusion
P04626/D769H	P04626	ERBB2	ERBB2_HUMAN	D769H	148	αC	-	-	NKEILdAYVMA	0.306	0.34	0.354	0.534	0.466	0.505	0.431	0.368	0.428	0.628	0.383	18	oncogene, fusion
P08922/K2228Q	P08922	ROS1	ROS1_HUMAN	K2228Q	863	C-term-αI	-	neutral	LNSIYkRDEAN	0.801	0.052	0.146	0.23	0.182	0.435	0.219	0.21	0.167	0.645	0.254	18	oncogene, fusion
P08922/S2229C	P08922	ROS1	ROS1_HUMAN	S2229C	864	C-term-αI	-	neutral	NSIYKsDEANN	0.832	0.072	0.096	0.172	0.22	0.313	0.232	0.233	0.168	0.635	0.173	18	oncogene, fusion
P46734/T222M	P46734	MAP2K3	MP2K3_HUMAN	T222M	528	A-loop	p	-	DSVAKtDAGCK	0.072	0.643	0.285	0.949	0.944	0.422	0.791	0.671	0.92	0.427	0.541	18	NA
Q9UM73/F1174C	Q9UM73	ALK	ALK_HUMAN	F1174C	159	αC/β4-loop	-	-	LIISKfHQNIV	0.273	0.228	0.5	0.558	0.569	0.566	0.605	0.34	0.466	0.654	0.626	17	oncogene, fusion
Q15831/D194Y	Q15831	STK11	STK11_HUMAN	D194Y	479	A-loop;DFG-motif	-	-	TLKISdGVAEA	0.018	0.955	0.027	0.934	0.934	0.077	0.568	0.93	0.891	0.056	0.613	17	TSG
P00533/V769L	P00533	EGFR	EGFR_HUMAN	V769L	159	αC/β4-loop	-	-	YVMASvNPHVC	0.402	0.205	0.392	0.417	0.387	0.552	0.518	0.308	0.234	0.65	0.547	17	oncogene
Q8TEA7/K285N	Q8TEA7	TBCK	TBCK_HUMAN	K285N	864	C-term-αI	-	-	YTPFTkASLFS	0.685	0.123	0.192	0.212	0.267	0.473	0.312	0.236	0.189	0.632	0.187	17	NA
Q02750/D67N	Q02750	MAP2K1	MP2K1_HUMAN	D67N	30	N-term-β1	-	-	ELKDDdEKISE	0.36	0.343	0.297	0.517	0.473	0.452	0.422	0.368	0.418	0.612	0.357	17	oncogene
P15056/G596R	P15056	BRAF	BRAF_HUMAN	G596R	481	A-loop;DFG-motif	-	-	KIGDFgATVKS	0.084	0.457	0.459	0.862	0.864	0.464	0.746	0.56	0.835	0.495	0.651	17	oncogene, fusion
P36897/S241L	P36897	TGFBR1	TGFR1_HUMAN	S241L	119	αC	-	-	SREERsFREAE	0.229	0.424	0.347	0.614	0.652	0.416	0.534	0.526	0.559	0.478	0.492	17	NA
Q02750/K57E	Q02750	MAP2K1	MP2K1_HUMAN	K57E	20	N-term-β1	ub	activating,resistance	AFLTQkKVGEL	0.183	0.259	0.558	0.667	0.605	0.657	0.692	0.34	0.559	0.673	0.426	16	oncogene
P15056/L597V	P15056	BRAF	BRAF_HUMAN	L597V	482	A-loop	-	increase	IGDFGlTVKSR	0.152	0.288	0.56	0.83	0.768	0.636	0.733	0.449	0.627	0.627	0.627	16	oncogene, fusion
P15056/T599I	P15056	BRAF	BRAF_HUMAN	T599I	485	A-loop	p	-	DFGLAtKSRWS	0.08	0.405	0.515	0.846	0.829	0.504	0.846	0.534	0.852	0.556	0.567	16	oncogene, fusion
P00533/V843I	P00533	EGFR	EGFR_HUMAN	V843I	432	Catalytic-loop	-	-	LAARNvVKTPQ	0.749	0.123	0.128	0.292	0.227	0.438	0.236	0.234	0.237	0.634	0.233	16	oncogene
O95835/R995C	O95835	LATS1	LATS1_HUMAN	R995C	832	αH/αI-loop	-	-	RGPEDrGKNGA	0.123	0.637	0.24	0.739	0.78	0.284	0.59	0.662	0.782	0.323	0.46	16	TSG
P11309/L164F	P11309	PIM1	PIM1_HUMAN	L164F	419	Catalytic-loop	-	-	HNCGVlRDIKD	0.522	0.142	0.337	0.339	0.277	0.458	0.341	0.297	0.237	0.602	0.26	15	oncogene, fusion
P15056/V600A	P15056	BRAF	BRAF_HUMAN	V600A	491	A-loop	-	-	FGLATvSRWSG	0.086	0.118	0.796	0.836	0.803	0.95	0.851	0.174	0.499	0.924	0.799	15	oncogene, fusion
P00533/V834L	P00533	EGFR	EGFR_HUMAN	V834L	419	Catalytic-loop	-	-	EDRRLvRDLAA	0.461	0.242	0.297	0.349	0.234	0.438	0.34	0.329	0.281	0.58	0.289	15	oncogene
P15056/N581I	P15056	BRAF	BRAF_HUMAN	N581I	431	Catalytic-loop	-	-	DLKSNnFLHED	0.052	0.769	0.179	0.825	0.847	0.194	0.689	0.767	0.839	0.261	0.578	15	oncogene, fusion
P15056/K483E	P15056	BRAF	BRAF_HUMAN	K483E	96	β3;Catalytic-Lys	-	-	GDVAVkLNVTA	0.003	0.996	0.001	0.996	0.995	0.01	0.702	0.988	0.996	0.019	0.61	15	oncogene, fusion
Q02750/G128D	Q02750	MAP2K1	MP2K1_HUMAN	G128D	180	αC/β4-loop	-	resistance	SPYIVgYGAFY	0.253	0.12	0.628	0.691	0.518	0.743	0.679	0.204	0.261	0.792	0.693	15	oncogene
Q9HBY8/H248P	Q9HBY8	SGK2	SGK2_HUMAN	H248P	660	αG	-	-	YENILhPLQIP	0.242	0.389	0.368	0.591	0.578	0.514	0.586	0.448	0.526	0.582	0.461	15	NA
P53350/S326L	P53350	PLK1	PLK1_HUMAN	S326L	873	C-term-αI	p	-	IPPRFsAPSSL	0.255	0.274	0.47	0.581	0.617	0.536	0.649	0.383	0.541	0.596	0.34	15	NA
P41743/R480C	P41743	PRKCI	KPCI_HUMAN	R480C	695	αG/αH-loop	-	-	LEKQIrPRSLS	0.282	0.336	0.382	0.493	0.524	0.453	0.483	0.429	0.506	0.554	0.307	15	NA
P11309/L193F	P11309	PIM1	PIM1_HUMAN	L193F	492	A-loop	-	decrease	GSGALlDTVYT	0.315	0.315	0.37	0.552	0.449	0.587	0.539	0.351	0.386	0.607	0.37	14	oncogene, fusion
P11309/S75F	P11309	PIM1	PIM1_HUMAN	S75F	117	β3/αC-loop	-	-	EKDRIsWGELP	0.507	0.201	0.293	0.413	0.312	0.477	0.374	0.309	0.365	0.565	0.27	14	oncogene, fusion
P52333/L857P	P52333	JAK3	JAK3_HUMAN	L857P	98	β3	-	-	VAVKQlHSGPD	0.135	0.491	0.373	0.795	0.761	0.469	0.652	0.62	0.743	0.45	0.68	14	oncogene
O60674/N1108S	O60674	JAK2	JAK2_HUMAN	N1108S	825	αH/αI-loop	-	-	TECWNnVNQRP	0.836	0.053	0.11	0.166	0.125	0.446	0.182	0.138	0.087	0.684	0.124	14	oncogene, fusion
P15056/G466R	P15056	BRAF	BRAF_HUMAN	G466R	40	β1;Gly-rich-loop	-	-	QRIGSgFGTVY	0.058	0.769	0.172	0.872	0.873	0.312	0.718	0.747	0.876	0.303	0.664	14	oncogene, fusion
P15056/G464E	P15056	BRAF	BRAF_HUMAN	G464E	38	β1;Gly-rich-loop	-	-	VGQRIgGSFGT	0.071	0.508	0.421	0.846	0.785	0.518	0.745	0.563	0.787	0.568	0.692	14	oncogene, fusion
Q15831/P281L	Q15831	STK11	STK11_HUMAN	P281L	812	αH	-	-	GDCGPpSDLLK	0.786	0.077	0.138	0.163	0.184	0.497	0.236	0.163	0.143	0.693	0.217	14	TSG
P21127/D653E	P21127	CDK11B	CD11B_HUMAN	D653E	675	αG/αH-loop	-	-	NKVFKdGTPSE	0.612	0.088	0.301	0.188	0.226	0.516	0.292	0.174	0.186	0.688	0.211	14	NA
P15056/F595L	P15056	BRAF	BRAF_HUMAN	F595L	480	A-loop;DFG-motif	-	-	VKIGDfLATVK	0.147	0.495	0.358	0.761	0.705	0.459	0.669	0.574	0.725	0.479	0.643	14	oncogene, fusion
P04626/T733I	P04626	ERBB2	ERBB2_HUMAN	T733I	44	β2	p	-	SGAFGtYKGIW	0.185	0.328	0.486	0.727	0.757	0.566	0.687	0.426	0.656	0.614	0.626	14	oncogene, fusion
P11309/A10V	P11309	PIM1	PIM1_HUMAN	A10V	3	N-term-β1	-	-	KINSLaLRAAP	0.583	0.157	0.26	0.371	0.336	0.555	0.316	0.25	0.294	0.636	0.322	13	oncogene, fusion
P11309/G99D	P11309	PIM1	PIM1_HUMAN	G99D	170	αC/β4-loop	-	-	KKVSSgSGVIR	0.359	0.326	0.315	0.498	0.478	0.449	0.441	0.452	0.487	0.519	0.414	13	oncogene, fusion
P11309/S146R	P11309	PIM1	PIM1_HUMAN	S146R	376	αE	-	-	EELARsFWQVL	0.557	0.146	0.297	0.276	0.225	0.464	0.298	0.254	0.209	0.671	0.258	13	oncogene, fusion
P68400/D256G	P68400	CSNK2A1	CSK21_HUMAN	D256G	693	αG/αH-loop	-	-	TEDLYdIDKYN	0.786	0.079	0.135	0.131	0.141	0.407	0.225	0.153	0.122	0.682	0.142	13	NA
Q9UM73/F1245V	Q9UM73	ALK	ALK_HUMAN	F1245V	418	Catalytic-loop	-	-	LEENHfHRDIA	0.306	0.283	0.411	0.553	0.511	0.47	0.5	0.438	0.479	0.564	0.468	13	oncogene, fusion
P11309/L25V	P11309	PIM1	PIM1_HUMAN	L25V	18	N-term-β1	-	-	LHATKlPGKEK	0.686	0.14	0.174	0.363	0.283	0.476	0.266	0.272	0.276	0.591	0.269	13	oncogene, fusion
P00533/D761Y	P00533	EGFR	EGFR_HUMAN	D761Y	148	αC	-	resistance	NKEILdAYVMA	0.291	0.348	0.361	0.661	0.539	0.498	0.521	0.431	0.569	0.567	0.588	13	oncogene
P21860/Q809R	P21860	ERBB3	ERBB3_HUMAN	Q809R	367	αE	-	-	GALGPqLLNWG	0.336	0.225	0.439	0.435	0.385	0.533	0.422	0.284	0.325	0.659	0.308	13	oncogene
Q15303/R847H	Q15303	ERBB4	ERBB4_HUMAN	R847H	430	Catalytic-loop	-	-	RDLAArVLVKS	0.234	0.512	0.254	0.714	0.657	0.352	0.529	0.587	0.619	0.374	0.447	13	oncogene, TSG
Q9UEW8/Y182C	Q9UEW8	STK39	STK39_HUMAN	Y182C	390	αE	-	-	LEGLDyHRNGQ	0.16	0.54	0.3	0.719	0.712	0.383	0.582	0.634	0.706	0.363	0.536	13	NA
Q5TCX8/E314K	Q5TCX8	MAP3K21	M3K21_HUMAN	E314K	544	A-loop;APE-motif	-	-	AWMAPeIKSSL	0.074	0.785	0.141	0.821	0.843	0.201	0.545	0.787	0.878	0.185	0.557	13	NA
P11309/E142D	P11309	PIM1	PIM1_HUMAN	E142D	367	αE	-	-	GALQEeARSFF	0.833	0.049	0.118	0.214	0.157	0.479	0.254	0.15	0.09	0.64	0.154	12	oncogene, fusion
P11309/P125S	P11309	PIM1	PIM1_HUMAN	P125S	239	β5/αD-loop	-	-	LERPEpQDLFD	0.618	0.112	0.269	0.273	0.226	0.444	0.253	0.203	0.181	0.667	0.302	12	oncogene, fusion
P22455/V550M	P22455	FGFR4	FGFR4_HUMAN	V550M	233	β5	-	resistance	PLYVIvCAAKG	0.594	0.13	0.276	0.575	0.285	0.471	0.292	0.247	0.214	0.707	0.815	12	oncogene
P11802/R24L	P11802	CDK4	CDK4_HUMAN	R24L	53	β2	-	-	TVYKArPHSGH	0.193	0.25	0.557	0.589	0.653	0.607	0.617	0.395	0.578	0.717	0.433	12	oncogene
P00533/R776H	P00533	EGFR	EGFR_HUMAN	R776H	180	αC/β4-loop	-	-	NPHVCrLGICL	0.228	0.124	0.648	0.692	0.592	0.761	0.64	0.206	0.308	0.807	0.552	12	oncogene
P00533/T751I	P00533	EGFR	EGFR_HUMAN	T751I	114	β3/αC-loop	-	-	ELREAtPKANK	0.342	0.311	0.346	0.439	0.444	0.472	0.503	0.366	0.432	0.589	0.449	12	oncogene
P04626/G776V	P04626	ERBB2	ERBB2_HUMAN	G776V	156	αC/β4-loop	-	-	AYVMAgGSPYV	0.375	0.269	0.357	0.477	0.387	0.56	0.452	0.29	0.317	0.703	0.36	12	oncogene, fusion
P21802/K659N	P21802	FGFR2	FGFR2_HUMAN	K659N	525	A-loop	-	activating	IDYYKkTNGRL	0.079	0.138	0.783	0.797	0.808	0.8	0.875	0.201	0.596	0.811	0.519	12	oncogene, fusion
Q13627/R467Q	Q13627	DYRK1A	DYR1A_HUMAN	R467Q	832	αH/αI-loop	-	-	YDPKTrQPYYA	0.116	0.706	0.178	0.752	0.764	0.206	0.565	0.674	0.752	0.219	0.432	12	NA
Q59H18/E662K	Q59H18	TNNI3K	TNI3K_HUMAN	E662K	606	αF/αG-loop	-	-	EILTGePFAHL	0.594	0.16	0.246	0.3	0.287	0.444	0.286	0.266	0.248	0.612	0.237	12	NA
Q15831/D194N	Q15831	STK11	STK11_HUMAN	D194N	479	A-loop;DFG-motif	-	-	TLKISdGVAEA	0.021	0.945	0.034	0.931	0.922	0.09	0.583	0.896	0.902	0.103	0.548	12	TSG
P23458/G1097D	P23458	JAK1	JAK1_HUMAN	G1097D	631	αF/αG-loop	-	-	IGPTHgMTVTR	0.333	0.322	0.345	0.449	0.356	0.529	0.427	0.288	0.358	0.691	0.269	12	oncogene, TSG
Q16288/K746T	Q16288	NTRK3	NTRK3_HUMAN	K746T	550	A-loop	-	-	SIMYRkTTESD	0.459	0.185	0.356	0.348	0.348	0.477	0.35	0.268	0.279	0.603	0.271	12	oncogene, fusion
P21802/K659M	P21802	FGFR2	FGFR2_HUMAN	K659M	525	A-loop	-	resistance	IDYYKkTNGRL	0.054	0.145	0.801	0.843	0.858	0.796	0.906	0.272	0.669	0.764	0.64	12	oncogene, fusion
P11309/E30K	P11309	PIM1	PIM1_HUMAN	E30K	23	N-term-β1	-	-	LAPGKeEPLES	0.486	0.264	0.25	0.437	0.366	0.453	0.359	0.347	0.423	0.591	0.218	11	oncogene, fusion
P11309/S97R	P11309	PIM1	PIM1_HUMAN	S97R	162	αC/β4-loop	-	-	LLKKVsGFSGV	0.52	0.245	0.234	0.393	0.342	0.391	0.302	0.397	0.383	0.511	0.281	11	oncogene, fusion
P11309/V151M	P11309	PIM1	PIM1_HUMAN	V151M	381	αE	-	-	SFFWQvEAVRH	0.329	0.289	0.382	0.39	0.408	0.502	0.414	0.343	0.382	0.62	0.388	11	oncogene, fusion
P52333/V674A	P52333	JAK3	JAK3_HUMAN	V674A	482	A-loop	-	-	LSDPGvPAVLS	0.188	0.309	0.503	0.77	0.701	0.603	0.71	0.401	0.645	0.617	0.548	11	oncogene
Q9UM73/I1171N	Q9UM73	ALK	ALK_HUMAN	I1171N	154	αC	-	resistance	MEALIiKFNHQ	0.22	0.382	0.399	0.736	0.66	0.484	0.592	0.516	0.623	0.497	0.671	11	oncogene, fusion
P10721/V560G	P10721	KIT	KIT_HUMAN	V560G	2	N-term-β1	-	-	VQWKVvEINGN	0.255	0.384	0.361	0.714	0.692	0.5	0.574	0.519	0.69	0.436	0.62	11	oncogene
P54762/D762N	P54762	EPHB1	EPHB1_HUMAN	D762N	479	A-loop;DFG-motif	-	-	VCKVSdGLSRY	0.055	0.889	0.056	0.925	0.917	0.132	0.564	0.87	0.874	0.119	0.572	11	NA
Q15746/E1668K	Q15746	MYLK	MYLK_HUMAN	E1668K	642	αG	-	-	GDNDNeLANVT	0.434	0.277	0.29	0.4	0.401	0.497	0.414	0.335	0.334	0.592	0.267	11	NA
Q9P286/R433W	Q9P286	PAK5	PAK5_HUMAN	R433W	10	N-term-β1	-	-	SHEQFrALQLV	0.201	0.431	0.368	0.669	0.661	0.472	0.632	0.505	0.619	0.524	0.41	11	NA
O60674/G571S	O60674	JAK2	JAK2_HUMAN	G571S	79	β2/β3-loop	-	-	EVGDYgLHETE	0.723	0.104	0.173	0.248	0.249	0.479	0.258	0.163	0.163	0.654	0.194	11	oncogene, fusion
P08581/Y1230H	P08581	MET	MET_HUMAN	Y1230H	498	A-loop	p	resistance	LARDMyKEYYS	0.137	0.348	0.515	0.849	0.85	0.62	0.803	0.427	0.717	0.603	0.845	11	oncogene
P10721/N655K	P10721	KIT	KIT_HUMAN	N655K	180	αC/β4-loop	-	-	HMNIVnLGACT	0.156	0.147	0.697	0.713	0.594	0.723	0.751	0.217	0.343	0.822	0.78	11	oncogene
Q13233/S1330L	Q13233	MAP3K1	M3K1_HUMAN	S1330L	241	β5/αD-loop	-	-	WMAGGsAHLLS	0.182	0.539	0.279	0.713	0.692	0.427	0.656	0.545	0.608	0.42	0.78	11	oncogene, TSG
Q15303/D843N	Q15303	ERBB4	ERBB4_HUMAN	D843N	426	Catalytic-loop;HrD-motif	-	loss	RLVHRdAARNV	0.085	0.727	0.188	0.9	0.872	0.271	0.541	0.806	0.809	0.243	0.506	11	oncogene, TSG
P00533/H835L	P00533	EGFR	EGFR_HUMAN	H835L	423	Catalytic-loop;HrD-motif	-	-	DRRLVhDLAAR	0.17	0.552	0.278	0.635	0.704	0.397	0.571	0.57	0.688	0.38	0.475	11	oncogene
P15056/G466A	P15056	BRAF	BRAF_HUMAN	G466A	40	β1;Gly-rich-loop	-	-	QRIGSgFGTVY	0.062	0.746	0.193	0.865	0.905	0.388	0.711	0.688	0.861	0.357	0.644	11	oncogene, fusion
P35968/S1100F	P35968	KDR	VGFR2_HUMAN	S1100F	601	αF	-	-	LWEIFsGASPY	0.249	0.435	0.316	0.633	0.666	0.435	0.619	0.458	0.57	0.495	0.494	11	oncogene
P08581/H1094Y	P08581	MET	MET_HUMAN	H1094Y	48	β2	-	activating	FGCVYhTLLDN	0.2	0.177	0.623	0.613	0.543	0.656	0.663	0.253	0.418	0.733	0.392	11	oncogene
P08581/Y1230C	P08581	MET	MET_HUMAN	Y1230C	498	A-loop	p	resistance	LARDMyKEYYS	0.102	0.401	0.497	0.856	0.878	0.572	0.825	0.503	0.81	0.528	0.85	11	oncogene
P68400/R80C	P68400	CSNK2A1	CSK21_HUMAN	R80C	148	αC	-	-	KKKIKrIKILE	0.119	0.545	0.336	0.765	0.743	0.433	0.619	0.543	0.779	0.401	0.55	11	NA
Q8TEA7/T281P	Q8TEA7	TBCK	TBCK_HUMAN	T281P	860	C-term-αI	-	-	VSPLYtFTKPA	0.735	0.098	0.167	0.317	0.309	0.409	0.3	0.279	0.221	0.602	0.25	11	NA
P11309/C17Y	P11309	PIM1	PIM1_HUMAN	C17Y	10	N-term-β1	-	-	LRAAPcDLHAT	0.341	0.361	0.298	0.583	0.547	0.482	0.506	0.421	0.495	0.569	0.478	10	oncogene, fusion
P11309/E32K	P11309	PIM1	PIM1_HUMAN	E32K	25	N-term-β1	-	-	PGKEKeLESQY	0.556	0.19	0.253	0.324	0.315	0.474	0.356	0.335	0.272	0.543	0.247	10	oncogene, fusion
P11309/P87S	P11309	PIM1	PIM1_HUMAN	P87S	147	αC	-	-	NGTRVpEVVLL	0.276	0.345	0.379	0.573	0.597	0.455	0.484	0.535	0.586	0.538	0.453	10	oncogene, fusion
P11309/S97T	P11309	PIM1	PIM1_HUMAN	S97T	162	αC/β4-loop	-	-	LLKKVsGFSGV	0.726	0.148	0.126	0.308	0.309	0.347	0.23	0.375	0.296	0.499	0.186	10	oncogene, fusion
P36888/D835N	P36888	FLT3	FLT3_HUMAN	D835N	491	A-loop	-	activating	FGLARdMSDSN	0.02	0.023	0.956	0.903	0.845	0.959	0.903	0.108	0.438	0.958	0.901	10	oncogene
Q00535/F82I	Q00535	CDK5	CDK5_HUMAN	F82I	235	β5/αD-loop	-	-	TLVFEfDQDLK	0.174	0.411	0.415	0.763	0.692	0.547	0.63	0.46	0.643	0.582	0.818	10	NA
Q9UM73/F1245C	Q9UM73	ALK	ALK_HUMAN	F1245C	418	Catalytic-loop	-	-	LEENHfHRDIA	0.3	0.264	0.436	0.558	0.569	0.473	0.512	0.47	0.534	0.582	0.426	10	oncogene, fusion
O96017/R474C	O96017	CHEK2	CHK2_HUMAN	R474C	832	αH/αI-loop	-	-	VDPKArTTEEA	0.115	0.671	0.214	0.752	0.795	0.295	0.583	0.646	0.782	0.328	0.435	10	TSG
P10721/D820E	P10721	KIT	KIT_HUMAN	D820E	503	A-loop	-	resistance	RDIKNdNYVVK	0.38	0.205	0.415	0.559	0.518	0.636	0.635	0.29	0.425	0.692	0.679	10	oncogene
P22607/P449S	P22607	FGFR3	FGFR3_HUMAN	P449S	8	N-term-β1	-	-	SSGEGpLANVS	0.343	0.338	0.318	0.479	0.46	0.47	0.447	0.432	0.412	0.574	0.39	10	oncogene, fusion
Q9P286/M636I	Q9P286	PAK5	PAK5_HUMAN	M636I	598	αF	-	-	IMVIEmDGEPP	0.198	0.422	0.38	0.668	0.674	0.537	0.602	0.508	0.618	0.556	0.564	10	NA
P07949/S891L	P07949	RET	RET_HUMAN	S891L	478	Catalytic-loop	p	-	RKMKIsFGLSR	0.164	0.4	0.436	0.729	0.744	0.519	0.684	0.478	0.653	0.556	0.63	10	oncogene, fusion
Q15375/P603S	Q15375	EPHA7	EPHA7_HUMAN	P603S	1	N-term-β1	-	-	FHFKFpTKTYI	0.273	0.357	0.37	0.757	0.692	0.407	0.652	0.47	0.673	0.423	0.613	10	inconclusive
P15056/L584F	P15056	BRAF	BRAF_HUMAN	L584F	434	Catalytic-loop	-	-	SNNIFlEDLTV	0.236	0.342	0.422	0.596	0.6	0.51	0.572	0.436	0.536	0.559	0.577	10	oncogene, fusion
O60674/T875N	O60674	JAK2	JAK2_HUMAN	T875N	79	β2/β3-loop	-	-	PLQDNtEVVAV	0.3	0.319	0.381	0.511	0.446	0.466	0.504	0.39	0.449	0.606	0.398	10	oncogene, fusion
P27448/E120K	P27448	MARK3	MARK3_HUMAN	E120K	184	β4	-	-	IVKLFeIETEK	0.246	0.296	0.458	0.631	0.582	0.468	0.552	0.407	0.587	0.54	0.451	10	NA
P36897/R487W	P36897	TGFBR1	TGFR1_HUMAN	R487W	845	αI	-	-	RLTALrKKTLS	0.131	0.481	0.388	0.714	0.649	0.407	0.62	0.537	0.673	0.424	0.468	10	NA
Q02750/K57T	Q02750	MAP2K1	MP2K1_HUMAN	K57T	20	N-term-β1	ub	resistance	AFLTQkKVGEL	0.196	0.262	0.541	0.667	0.638	0.584	0.724	0.326	0.563	0.621	0.461	10	oncogene
Q6IQ55/L8P	Q6IQ55	TTBK2	TTBK2_HUMAN	L8P	17	N-term-β1	-	neutral	GGGEQlILSVG	0.638	0.16	0.202	0.334	0.328	0.319	0.276	0.32	0.248	0.6	0.246	10	NA
Q9P286/E447K	Q9P286	PAK5	PAK5_HUMAN	E447K	24	N-term-β1	-	-	PGDPReLANFI	0.733	0.105	0.161	0.246	0.208	0.422	0.283	0.208	0.17	0.624	0.19	10	NA
O75460/S570F	O75460	ERN1	ERN1_HUMAN	S570F	26	N-term-β1	-	-	IVGKIsCPKDV	0.281	0.267	0.452	0.616	0.558	0.559	0.546	0.404	0.448	0.635	0.395	10	NA
P00533/D761N	P00533	EGFR	EGFR_HUMAN	D761N	148	αC	-	-	NKEILdAYVMA	0.379	0.319	0.301	0.453	0.39	0.437	0.355	0.346	0.347	0.604	0.335	10	oncogene
Q15831/R304W	Q15831	STK11	STK11_HUMAN	R304W	847	αI	-	-	SIRQIrHSWFR	0.317	0.28	0.403	0.55	0.509	0.426	0.511	0.459	0.435	0.545	0.388	10	TSG
Q96QS6/A176S	Q96QS6	PSKH2	KPSH2_HUMAN	A176S	402	Catalytic-loop	-	neutral	IRYLHaQITHR	0.883	0.021	0.097	0.093	0.118	0.346	0.144	0.119	0.08	0.645	0.154	10	NA
Q9P286/E542K	Q9P286	PAK5	PAK5_HUMAN	E542K	366	αE	-	-	HTRMNeQIATV	0.167	0.382	0.451	0.666	0.627	0.515	0.643	0.46	0.61	0.557	0.535	10	NA
Q9NR20/R176C	Q9NR20	DYRK4	DYRK4_HUMAN	R176C	217	β4/β5-loop	-	-	DFFYFrHFCIT	0.175	0.509	0.317	0.704	0.694	0.365	0.576	0.541	0.728	0.409	0.435	10	NA
P00533/A750P	P00533	EGFR	EGFR_HUMAN	A750P	111	β3/αC-loop	-	-	KELREaSPKAN	0.55	0.219	0.231	0.387	0.304	0.472	0.309	0.312	0.302	0.62	0.329	9	oncogene
P10721/Y823C	P10721	KIT	KIT_HUMAN	Y823C	508	A-loop	p	-	KNDSNyVKGNA	0.08	0.48	0.44	0.92	0.922	0.451	0.83	0.662	0.891	0.445	0.644	9	oncogene
P11309/E70K	P11309	PIM1	PIM1_HUMAN	E70K	102	β3/αC-loop	-	-	AIKHVeDRISD	0.758	0.105	0.137	0.305	0.293	0.44	0.265	0.264	0.246	0.588	0.233	9	oncogene, fusion
P11309/G48D	P11309	PIM1	PIM1_HUMAN	G48D	41	Gly-rich-loop;β1/β2-loop	-	-	LLGSGgGSVYS	0.15	0.507	0.343	0.729	0.751	0.432	0.597	0.535	0.701	0.507	0.519	9	oncogene, fusion
P11309/L184V	P11309	PIM1	PIM1_HUMAN	L184V	477	Catalytic-loop	-	-	RGELKlDFGSG	0.34	0.292	0.369	0.454	0.488	0.493	0.432	0.433	0.337	0.628	0.455	9	oncogene, fusion
P11309/S146N	P11309	PIM1	PIM1_HUMAN	S146N	376	αE	-	-	EELARsFWQVL	0.748	0.097	0.155	0.217	0.21	0.42	0.222	0.194	0.146	0.644	0.173	9	oncogene, fusion
O14920/K171E	O14920	IKBKB	IKKB_HUMAN	K171E	485	A-loop	ub	increase	DLGYAkLDQGS	0.059	0.239	0.701	0.831	0.867	0.71	0.873	0.398	0.863	0.661	0.521	9	oncogene
P00533/L792F	P00533	EGFR	EGFR_HUMAN	L792F	235	β5/αD-loop	-	resistance	QLITQlPFGCL	0.602	0.167	0.231	0.579	0.338	0.531	0.375	0.265	0.265	0.692	0.71	9	oncogene
P10721/D816A	P10721	KIT	KIT_HUMAN	D816A	491	A-loop	-	-	FGLARdKNDSN	0.038	0.144	0.818	0.927	0.894	0.962	0.962	0.173	0.667	0.898	0.939	9	oncogene
P15056/H574Q	P15056	BRAF	BRAF_HUMAN	H574Q	423	Catalytic-loop;HrD-motif	-	-	AKSIIhDLKSN	0.08	0.685	0.235	0.739	0.729	0.272	0.574	0.667	0.786	0.264	0.53	9	oncogene, fusion
P29322/T843A	P29322	EPHA8	EPHA8_HUMAN	T843A	637	αF/αG-loop	-	-	PYWNMtRDVIS	0.297	0.467	0.236	0.443	0.451	0.415	0.411	0.443	0.407	0.496	0.291	9	NA
P05771/S352G	P05771	PRKCB	KPCB_HUMAN	S352G	41	Gly-rich-loop;β1/β2-loop	-	-	VLGKGsGKVML	0.294	0.331	0.375	0.598	0.49	0.47	0.479	0.427	0.525	0.535	0.419	9	inconclusive
P29322/E612Q	P29322	EPHA8	EPHA8_HUMAN	E612Q	8	N-term-β1	-	neutral	PQFYAeHTYEE	0.648	0.169	0.184	0.304	0.311	0.468	0.226	0.283	0.214	0.616	0.289	9	NA
P35968/G1161E	P35968	KDR	VGFR2_HUMAN	G1161E	851	αI	-	-	LVEHLgLLQAN	0.347	0.194	0.459	0.411	0.409	0.531	0.452	0.289	0.346	0.707	0.365	9	oncogene
P36507/C125S	P36507	MAP2K2	MP2K2_HUMAN	C125S	159	αC/β4-loop	-	resistance	QVLHEcSPYIV	0.245	0.357	0.398	0.696	0.629	0.534	0.611	0.452	0.596	0.573	0.762	9	oncogene
P36888/N841T	P36888	FLT3	FLT3_HUMAN	N841T	507	A-loop	-	-	IMSDSnVVRGN	0.152	0.204	0.644	0.755	0.69	0.7	0.746	0.354	0.558	0.739	0.6	9	oncogene
P52333/R657W	P52333	JAK3	JAK3_HUMAN	R657W	439	Catalytic-loop	-	-	KVLLArGADGS	0.288	0.316	0.396	0.586	0.5	0.534	0.532	0.388	0.476	0.593	0.408	9	oncogene
Q02750/G128V	Q02750	MAP2K1	MP2K1_HUMAN	G128V	180	αC/β4-loop	-	resistance	SPYIVgYGAFY	0.212	0.168	0.619	0.766	0.603	0.712	0.668	0.275	0.347	0.786	0.725	9	oncogene
O75460/S674L	O75460	ERN1	ERN1_HUMAN	S674L	383	αE	-	-	LQQTTsLAHLH	0.301	0.356	0.344	0.564	0.554	0.481	0.516	0.464	0.364	0.526	0.383	9	NA
P00533/P733S	P00533	EGFR	EGFR_HUMAN	P733S	60	β2/β3-loop	-	-	KGLWIpGEKVK	0.233	0.465	0.302	0.614	0.601	0.436	0.507	0.528	0.661	0.469	0.52	9	oncogene
P09619/D776N	P09619	PDGFRB	PGFRB_HUMAN	D776N	336	αD/αE-loop	-	-	YMAPYdYVPSA	0.711	0.118	0.171	0.234	0.177	0.475	0.251	0.188	0.125	0.667	0.22	9	oncogene, fusion
P15056/A598V	P15056	BRAF	BRAF_HUMAN	A598V	484	A-loop	-	-	GDFGLaVKSRW	0.194	0.386	0.42	0.742	0.716	0.613	0.676	0.438	0.651	0.58	0.62	9	oncogene, fusion
P15056/E586K	P15056	BRAF	BRAF_HUMAN	E586K	439	Catalytic-loop	-	-	NIFLHeLTVKI	0.399	0.184	0.417	0.421	0.431	0.572	0.491	0.259	0.333	0.691	0.391	9	oncogene, fusion
Q04771/G356D	Q04771	ACVR1	ACVR1_HUMAN	G356D	481	A-loop;DFG-motif	-	-	CIADLgAVMHS	0.143	0.345	0.512	0.749	0.751	0.589	0.71	0.419	0.67	0.641	0.596	9	oncogene
Q15303/V840I	Q15303	ERBB4	ERBB4_HUMAN	V840I	419	Catalytic-loop	-	-	EERRLvRDLAA	0.807	0.072	0.121	0.173	0.128	0.367	0.197	0.198	0.115	0.608	0.174	9	oncogene, TSG
Q15375/R895Q	Q15375	EPHA7	EPHA7_HUMAN	R895Q	856	αI	-	-	LDKMIrPNSLK	0.413	0.227	0.361	0.382	0.35	0.599	0.427	0.243	0.306	0.708	0.228	9	inconclusive
Q15831/P221L	Q15831	STK11	STK11_HUMAN	P221L	542	A-loop;APE-motif	-	-	SPAFQpEIANG	0.273	0.409	0.318	0.626	0.602	0.445	0.486	0.467	0.562	0.521	0.473	9	TSG
P00533/K860I	P00533	EGFR	EGFR_HUMAN	K860I	485	A-loop	ub	-	DFGLAkLGAEE	0.089	0.429	0.482	0.857	0.87	0.524	0.82	0.517	0.863	0.536	0.571	9	oncogene
P04626/V697L	P04626	ERBB2	ERBB2_HUMAN	V697L	6	N-term-β1	-	-	QETELvPLTPS	0.72	0.131	0.149	0.211	0.237	0.438	0.26	0.269	0.176	0.637	0.186	9	oncogene, fusion
P15056/D594E	P15056	BRAF	BRAF_HUMAN	D594E	479	A-loop;DFG-motif	-	-	TVKIGdGLATV	0.022	0.9	0.078	0.938	0.958	0.132	0.649	0.917	0.898	0.137	0.607	9	oncogene, fusion
P15056/G464R	P15056	BRAF	BRAF_HUMAN	G464R	38	β1;Gly-rich-loop	-	-	VGQRIgGSFGT	0.06	0.48	0.46	0.839	0.78	0.522	0.747	0.548	0.811	0.511	0.713	9	oncogene, fusion
P54646/R239C	P54646	PRKAA2	AAPK2_HUMAN	R239C	806	αH	-	-	PEYLNrVATLL	0.47	0.183	0.346	0.338	0.307	0.477	0.421	0.27	0.245	0.651	0.214	9	NA
P54762/R743Q	P54762	EPHB1	EPHB1_HUMAN	R743Q	424	Catalytic-loop;HrD-motif	-	-	MNYVHrLAARN	0.111	0.571	0.318	0.773	0.789	0.394	0.627	0.628	0.782	0.381	0.502	9	NA
Q04771/R375C	Q04771	ACVR1	ACVR1_HUMAN	R375C	529	A-loop	-	-	VGNNPrGTKRY	0.061	0.503	0.436	0.918	0.887	0.502	0.846	0.511	0.903	0.489	0.539	9	oncogene
Q15831/G56W	Q15831	STK11	STK11_HUMAN	G56W	38	β1;Gly-rich-loop	-	-	MGDLLgGSYGK	0.087	0.586	0.327	0.818	0.76	0.367	0.675	0.601	0.73	0.386	0.66	9	TSG
O60674/R1113H	O60674	JAK2	JAK2_HUMAN	R1113H	832	αH/αI-loop	-	-	NNVNQrSFRDL	0.173	0.548	0.279	0.689	0.715	0.387	0.549	0.56	0.635	0.402	0.454	9	oncogene, fusion
P08922/R2126W	P08922	ROS1	ROS1_HUMAN	R2126W	539	A-loop	-	-	GLLPVrMAPES	0.146	0.43	0.424	0.695	0.705	0.465	0.603	0.502	0.677	0.524	0.449	9	oncogene, fusion
P36897/R487Q	P36897	TGFBR1	TGFR1_HUMAN	R487Q	845	αI	-	-	RLTALrKKTLS	0.244	0.271	0.484	0.596	0.548	0.564	0.567	0.329	0.492	0.617	0.361	9	NA
Q14680/V287I	Q14680	MELK	MELK_HUMAN	V287I	876	C-term-αI	-	-	LDDDCvELSVH	0.817	0.083	0.1	0.191	0.193	0.386	0.178	0.215	0.179	0.649	0.14	9	NA
Q8NE63/L108P	Q8NE63	HIPK4	HIPK4_HUMAN	L108P	362	αD/αE-loop	-	-	NNFAPlARHIR	0.178	0.549	0.273	0.773	0.759	0.368	0.572	0.619	0.718	0.44	0.657	9	NA
Q92519/D211N	Q92519	TRIB2	TRIB2_HUMAN	D211N	529	A-loop	-	-	DDSLSdHGCPA	0.141	0.483	0.376	0.908	0.844	0.46	0.792	0.565	0.817	0.455	0.451	9	NA
Q96QS6/V161I	Q96QS6	PSKH2	KPSH2_HUMAN	V161I	372	αE	-	-	TERDAvILQMV	0.873	0.057	0.07	0.105	0.134	0.404	0.14	0.142	0.101	0.663	0.117	9	NA
Q9NY57/R198G	Q9NY57	STK32B	ST32B_HUMAN	R198G	575	A-loop	-	neutral	QVYMDrPGYSY	0.845	0.044	0.112	0.125	0.147	0.39	0.211	0.118	0.108	0.698	0.119	9	NA
P00533/P753L	P00533	EGFR	EGFR_HUMAN	P753L	119	αC	-	-	REATSpANKEI	0.394	0.237	0.369	0.488	0.472	0.497	0.48	0.352	0.409	0.661	0.403	9	oncogene
P04626/G727A	P04626	ERBB2	ERBB2_HUMAN	G727A	38	β1;Gly-rich-loop	-	-	KVKVLgGAFGT	0.156	0.294	0.551	0.794	0.738	0.557	0.736	0.457	0.625	0.6	0.659	9	oncogene, fusion
Q9P286/D517N	Q9P286	PAK5	PAK5_HUMAN	D517N	218	β4/β5-loop	-	-	SYLVGdLWVVM	0.357	0.216	0.426	0.471	0.449	0.475	0.472	0.292	0.38	0.6	0.39	9	NA
O14733/R153H	O14733	MAP2K7	MP2K7_HUMAN	R153H	106	β3/αC-loop	-	-	VKQMRrGNKEE	0.323	0.277	0.4	0.449	0.461	0.514	0.454	0.34	0.416	0.568	0.317	9	NA
P00533/R776C	P00533	EGFR	EGFR_HUMAN	R776C	180	αC/β4-loop	-	-	NPHVCrLGICL	0.091	0.321	0.588	0.785	0.771	0.661	0.794	0.447	0.7	0.641	0.701	9	oncogene
P29320/E615K	P29320	EPHA3	EPHA3_HUMAN	E615K	24	N-term-β1	-	-	HEFAKeDATNI	0.331	0.286	0.383	0.509	0.426	0.484	0.453	0.349	0.417	0.559	0.298	9	inconclusive
P52333/A572V	P52333	JAK3	JAK3_HUMAN	A572V	149	αC	-	activating	ESFLEaSLMSQ	0.538	0.19	0.272	0.345	0.301	0.4	0.315	0.36	0.339	0.579	0.22	8	oncogene
P07949/E884V	P07949	RET	RET_HUMAN	E884V	439	Catalytic-loop	-	-	NILVAeRKMKI	0.302	0.322	0.376	0.564	0.534	0.53	0.535	0.405	0.496	0.532	0.465	8	oncogene, fusion
P07949/S891A	P07949	RET	RET_HUMAN	S891A	478	Catalytic-loop	p	-	RKMKIsFGLSR	0.218	0.357	0.425	0.658	0.638	0.545	0.566	0.371	0.613	0.584	0.501	8	oncogene, fusion
P11309/L143V	P11309	PIM1	PIM1_HUMAN	L143V	370	αE	-	-	ALQEElRSFFW	0.746	0.1	0.155	0.167	0.178	0.436	0.212	0.19	0.157	0.692	0.196	8	oncogene, fusion
P11309/L164V	P11309	PIM1	PIM1_HUMAN	L164V	419	Catalytic-loop	-	-	HNCGVlRDIKD	0.766	0.07	0.164	0.211	0.167	0.403	0.258	0.234	0.157	0.623	0.217	8	oncogene, fusion
P11309/P125A	P11309	PIM1	PIM1_HUMAN	P125A	239	β5/αD-loop	-	-	LERPEpQDLFD	0.468	0.224	0.308	0.351	0.338	0.451	0.346	0.284	0.298	0.626	0.39	8	oncogene, fusion
P11309/P33T	P11309	PIM1	PIM1_HUMAN	P33T	26	N-term-β1	-	-	GKEKEpESQYQ	0.539	0.205	0.257	0.42	0.387	0.48	0.329	0.341	0.341	0.605	0.209	8	oncogene, fusion
P36888/N841I	P36888	FLT3	FLT3_HUMAN	N841I	507	A-loop	-	-	IMSDSnVVRGN	0.13	0.224	0.645	0.789	0.783	0.714	0.734	0.353	0.641	0.77	0.644	8	oncogene
Q9UM73/F1245I	Q9UM73	ALK	ALK_HUMAN	F1245I	418	Catalytic-loop	-	-	LEENHfHRDIA	0.429	0.226	0.345	0.418	0.408	0.469	0.443	0.338	0.397	0.585	0.338	8	oncogene, fusion
Q9UM73/R1275L	Q9UM73	ALK	ALK_HUMAN	R1275L	485	A-loop	-	-	DFGMArIYRAS	0.103	0.418	0.479	0.799	0.835	0.527	0.778	0.538	0.857	0.516	0.553	8	oncogene, fusion
P00533/P753S	P00533	EGFR	EGFR_HUMAN	P753S	119	αC	-	-	REATSpANKEI	0.464	0.193	0.344	0.378	0.359	0.494	0.424	0.308	0.284	0.637	0.247	8	oncogene
P11309/A138V	P11309	PIM1	PIM1_HUMAN	A138V	358	αD/αE-loop	-	-	ITERGaQEELA	0.662	0.133	0.205	0.261	0.214	0.47	0.263	0.225	0.226	0.649	0.173	8	oncogene, fusion
P11309/G28A	P11309	PIM1	PIM1_HUMAN	G28A	21	N-term-β1	-	-	TKLAPgEKEPL	0.616	0.192	0.192	0.408	0.422	0.466	0.405	0.308	0.363	0.574	0.322	8	oncogene, fusion
P49137/T215P	P49137	MAPKAPK2	MAPK2_HUMAN	T215P	493	A-loop	-	-	FAKETtHNSLT	0.254	0.24	0.505	0.605	0.581	0.6	0.604	0.356	0.521	0.683	0.512	8	NA
Q15303/L798R	Q15303	ERBB4	ERBB4_HUMAN	L798R	235	β5/αD-loop	-	-	QLVTQlPHGCL	0.193	0.402	0.405	0.81	0.644	0.555	0.624	0.428	0.559	0.579	0.864	8	oncogene, TSG
O96017/S398C	O96017	CHEK2	CHK2_HUMAN	S398C	573	A-loop	-	-	PEVLVsGTAGY	0.557	0.157	0.286	0.331	0.343	0.492	0.401	0.285	0.267	0.653	0.232	8	TSG
P00533/H773L	P00533	EGFR	EGFR_HUMAN	H773L	173	αC/β4-loop	-	-	SVDNPhCRLLG	0.344	0.322	0.333	0.536	0.492	0.472	0.499	0.411	0.47	0.573	0.428	8	oncogene
P04626/H878Y	P04626	ERBB2	ERBB2_HUMAN	H878Y	525	A-loop	-	-	DETEYhDGGKV	0.113	0.229	0.658	0.785	0.817	0.719	0.816	0.346	0.665	0.719	0.572	8	oncogene, fusion
P31749/D323G	P31749	AKT1	AKT1_HUMAN	D323G	576	A-loop	-	-	PEVLEdDYGRA	0.228	0.366	0.406	0.608	0.612	0.505	0.52	0.451	0.593	0.575	0.533	8	oncogene
P45985/A279T	P45985	MAP2K4	MP2K4_HUMAN	A279T	574	A-loop	-	-	RIDPSaRQGYD	0.806	0.081	0.114	0.118	0.11	0.433	0.182	0.129	0.102	0.694	0.119	8	oncogene, TSG
P51955/S296L	P51955	NEK2	NEK2_HUMAN	S296L	878	C-term-αI	p	-	GEPEKsDSSPV	0.431	0.292	0.277	0.39	0.431	0.412	0.45	0.226	0.405	0.626	0.206	8	NA
Q13237/G637E	Q13237	PRKG2	KGP2_HUMAN	G637E	592	αF	-	-	DFWSLgLVYEL	0.161	0.605	0.234	0.657	0.685	0.251	0.572	0.619	0.695	0.318	0.52	8	NA
Q16288/R735C	Q16288	NTRK3	NTRK3_HUMAN	R735C	539	A-loop	-	-	TMLPIrMPPES	0.15	0.429	0.421	0.735	0.706	0.508	0.603	0.493	0.715	0.552	0.473	8	oncogene, fusion
Q8N752/D42E	Q8N752	CSNK1A1L	KC1AL_HUMAN	D42E	91	β3	-	neutral	TTNGEdAVKLE	0.777	0.082	0.141	0.209	0.272	0.381	0.223	0.227	0.194	0.616	0.204	8	NA
P00533/L858M	P00533	EGFR	EGFR_HUMAN	L858M	482	A-loop	-	-	ITDFGlKLLGA	0.399	0.233	0.367	0.607	0.591	0.56	0.575	0.359	0.535	0.648	0.459	8	oncogene
P00533/S752F	P00533	EGFR	EGFR_HUMAN	S752F	117	β3/αC-loop	-	-	LREATsKANKE	0.324	0.293	0.383	0.585	0.52	0.477	0.519	0.458	0.525	0.508	0.45	8	oncogene
P35968/G1145R	P35968	KDR	VGFR2_HUMAN	G1145R	825	αH/αI-loop	-	-	LDCWHgPSQRP	0.87	0.033	0.097	0.118	0.101	0.412	0.157	0.103	0.082	0.708	0.14	8	oncogene
P35968/R1066C	P35968	KDR	VGFR2_HUMAN	R1066C	530	A-loop	-	-	RKGDArPLKWM	0.141	0.637	0.222	0.804	0.771	0.314	0.669	0.632	0.818	0.32	0.467	8	oncogene
Q15303/E872K	Q15303	ERBB4	ERBB4_HUMAN	E872K	504	A-loop	-	-	LLEGDeEYNAD	0.45	0.195	0.355	0.489	0.494	0.526	0.538	0.423	0.382	0.589	0.307	8	oncogene, TSG
Q15303/R838Q	Q15303	ERBB4	ERBB4_HUMAN	R838Q	406	Catalytic-loop	-	-	YLEERrVHRDL	0.668	0.135	0.197	0.273	0.218	0.431	0.224	0.237	0.196	0.545	0.116	8	oncogene, TSG
Q16288/D576N	Q16288	NTRK3	NTRK3_HUMAN	D576N	107	β3/αC-loop	-	-	VKALKdTLAAR	0.672	0.153	0.175	0.26	0.269	0.44	0.242	0.305	0.227	0.59	0.221	8	oncogene, fusion
Q6ZWH5/L513S	Q6ZWH5	NEK10	NEK10_HUMAN	L513S	25	N-term-β1	-	neutral	QNKAPlYIGNY	0.842	0.058	0.1	0.153	0.212	0.341	0.207	0.205	0.165	0.582	0.197	8	NA
O14733/D261N	O14733	MAP2K7	MP2K7_HUMAN	D261N	479	A-loop;DFG-motif	-	-	QIKLCdGISGR	0.018	0.942	0.039	0.942	0.947	0.079	0.613	0.926	0.922	0.058	0.61	8	NA
P00533/G724S	P00533	EGFR	EGFR_HUMAN	G724S	43	Gly-rich-loop;β2	-	-	GSGAFgVYKGL	0.166	0.431	0.404	0.764	0.71	0.538	0.703	0.497	0.695	0.506	0.576	8	oncogene
P00533/S720F	P00533	EGFR	EGFR_HUMAN	S720F	39	β1;Gly-rich-loop	p	-	IKVLGsAFGTV	0.113	0.561	0.326	0.859	0.874	0.475	0.791	0.601	0.882	0.453	0.623	8	oncogene
P00533/T725M	P00533	EGFR	EGFR_HUMAN	T725M	44	β2	p	-	SGAFGtYKGLW	0.154	0.389	0.457	0.745	0.721	0.543	0.687	0.423	0.624	0.619	0.56	8	oncogene
P06241/R481Q	P06241	FYN	FYN_HUMAN	R481Q	661	αG/αH-loop	-	-	LEQVErYRMPC	0.746	0.073	0.181	0.185	0.195	0.55	0.254	0.134	0.123	0.776	0.111	8	NA
P08922/E1943K	P08922	ROS1	ROS1_HUMAN	E1943K	27	N-term-β1	-	-	PAFPReLTLRL	0.457	0.226	0.317	0.461	0.353	0.467	0.383	0.352	0.406	0.658	0.259	8	oncogene, fusion
P37173/R460H	P37173	TGFBR2	TGFR2_HUMAN	R460H	602	αF/αG-loop	-	-	WEMTSrNAVGE	0.225	0.393	0.381	0.632	0.607	0.449	0.531	0.452	0.532	0.548	0.452	8	TSG
Q9UM73/A1200V	Q9UM73	ALK	ALK_HUMAN	A1200V	238	β5/αD-loop	-	-	LLELMaGDLKS	0.361	0.244	0.395	0.458	0.389	0.464	0.369	0.348	0.359	0.612	0.434	8	oncogene, fusion
P16234/R822H	P16234	PDGFRA	PGFRA_HUMAN	R822H	430	Catalytic-loop	-	-	RDLAArVLLAQ	0.139	0.623	0.238	0.801	0.76	0.325	0.64	0.676	0.789	0.293	0.537	8	oncogene, fusion
P22612/H268D	P22612	PRKACG	KAPCG_HUMAN	H268D	816	αH	-	neutral	SSDLKhLRSLL	0.878	0.027	0.094	0.121	0.121	0.418	0.229	0.111	0.087	0.72	0.116	8	NA
P33981/E571K	P33981	TTK	TTK_HUMAN	E571K	149	αC	-	-	DSYRNeAYLNK	0.127	0.702	0.171	0.736	0.739	0.239	0.567	0.711	0.754	0.265	0.521	8	NA
P43405/A353T	P43405	SYK	KSYK_HUMAN	A353T	10	N-term-β1	-	activating	YESPYaPEEIR	0.738	0.108	0.154	0.226	0.253	0.412	0.24	0.171	0.149	0.628	0.148	8	oncogene, fusion
Q13164/R326H	Q13164	MAPK7	MK07_HUMAN	R326H	821	αH	-	-	LSLLGrLRFEP	0.5	0.291	0.209	0.319	0.311	0.474	0.309	0.316	0.27	0.618	0.187	8	NA
Q15303/R992C	Q15303	ERBB4	ERBB4_HUMAN	R992C	869	C-term-αI	-	-	IQGDDrKLPSP	0.437	0.226	0.337	0.357	0.361	0.511	0.427	0.308	0.281	0.657	0.273	8	oncogene, TSG
O14733/A203T	O14733	MAP2K7	MP2K7_HUMAN	A203T	250	αD	-	-	LMGTCaKLKKR	0.322	0.31	0.368	0.45	0.422	0.471	0.417	0.349	0.357	0.61	0.454	8	NA
P05129/A461V	P05129	PRKCG	KPCG_HUMAN	A461V	378	αE	-	-	HAAFYaEIAIG	0.28	0.344	0.376	0.493	0.517	0.48	0.474	0.389	0.459	0.604	0.415	8	NA
P35968/R944Q	P35968	KDR	VGFR2_HUMAN	R944Q	269	αD/αE-loop	-	-	KTKGArRQGKD	0.908	0.024	0.068	0.082	0.1	0.379	0.14	0.105	0.071	0.711	0.084	8	oncogene
P53667/E592K	P53667	LIMK1	LIMK1_HUMAN	E592K	828	αH/αI-loop	-	-	CDLDPeRPSFV	0.564	0.16	0.276	0.252	0.262	0.447	0.31	0.262	0.203	0.631	0.244	8	NA
Q8TAS1/V25G	Q8TAS1	UHMK1	UHMK1_HUMAN	V25G	33	β1	-	-	GRLWQvSRLGS	0.187	0.512	0.301	0.722	0.683	0.408	0.522	0.61	0.676	0.442	0.547	8	NA
Q96RU8/R297W	Q96RU8	TRIB1	TRIB1_HUMAN	R297W	660	αG	-	-	LFSKIrGQFCI	0.261	0.335	0.404	0.609	0.56	0.515	0.603	0.386	0.507	0.599	0.427	8	NA
Q9UK32/D692N	Q9UK32	RPS6KA6	KS6A6_HUMAN	D692N	861	C-term-αI	-	neutral	DQLPNdPKRND	0.667	0.166	0.167	0.334	0.318	0.414	0.342	0.26	0.364	0.661	0.251	8	NA
P08581/D1228N	P08581	MET	MET_HUMAN	D1228N	491	A-loop	-	resistance	FGLARdYDKEY	0.028	0.036	0.936	0.91	0.822	0.944	0.916	0.118	0.511	0.95	0.92	7	oncogene
O60674/R1113C	O60674	JAK2	JAK2_HUMAN	R1113C	832	αH/αI-loop	-	-	NNVNQrSFRDL	0.124	0.626	0.249	0.724	0.767	0.357	0.588	0.605	0.746	0.373	0.447	7	oncogene, fusion
P05771/E533K	P05771	PRKCB	KPCB_HUMAN	E533K	597	αF	-	-	GVLLYeLAGQA	0.142	0.52	0.338	0.692	0.686	0.377	0.562	0.562	0.744	0.411	0.533	7	inconclusive
P10721/D820V	P10721	KIT	KIT_HUMAN	D820V	503	A-loop	-	-	RDIKNdNYVVK	0.19	0.345	0.465	0.767	0.708	0.575	0.734	0.41	0.696	0.568	0.772	7	oncogene
P11309/Q127E	P11309	PIM1	PIM1_HUMAN	Q127E	241	β5/αD-loop	-	-	RPEPVqLFDFI	0.475	0.189	0.335	0.486	0.338	0.537	0.433	0.278	0.356	0.648	0.563	7	oncogene, fusion
P23458/L910P	P23458	JAK1	JAK1_HUMAN	L910P	98	β3	-	-	VAVKSlPESGG	0.203	0.42	0.377	0.745	0.747	0.442	0.605	0.575	0.73	0.446	0.669	7	oncogene, TSG
P35590/A916T	P35590	TIE1	TIE1_HUMAN	A916T	232	β5	-	-	GYLYIaEYAPY	0.369	0.246	0.385	0.424	0.396	0.502	0.408	0.256	0.37	0.66	0.288	7	NA
P36888/F691L	P36888	FLT3	FLT3_HUMAN	F691L	233	β5	-	resistance	PIYLIfYCCYG	0.591	0.158	0.251	0.58	0.318	0.521	0.333	0.279	0.294	0.684	0.827	7	oncogene
P36888/N841K	P36888	FLT3	FLT3_HUMAN	N841K	507	A-loop	-	-	IMSDSnVVRGN	0.174	0.263	0.563	0.759	0.692	0.714	0.743	0.33	0.622	0.762	0.609	7	oncogene
Q06187/C481Y	Q06187	BTK	BTK_HUMAN	C481Y	241	β5/αD-loop	-	resistance	YMANGcLNYLR	0.212	0.505	0.283	0.739	0.608	0.403	0.578	0.514	0.655	0.441	0.871	7	oncogene, TSG
O14920/V203I	O14920	IKBKB	IKKB_HUMAN	V203I	585	αF	-	increase	KYTVTvYWSFG	0.358	0.194	0.448	0.397	0.36	0.534	0.424	0.177	0.262	0.706	0.33	7	oncogene
O15146/R854Q	O15146	MUSK	MUSK_HUMAN	R854Q	848	αI	-	-	FTSIHrLERMC	0.825	0.057	0.118	0.121	0.153	0.466	0.193	0.145	0.114	0.699	0.097	7	NA
O43781/S445F	O43781	DYRK3	DYRK3_HUMAN	S445F	709	αG/αH-loop	-	-	KYFINsGIPRY	0.326	0.278	0.395	0.509	0.493	0.494	0.5	0.411	0.439	0.6	0.359	7	NA
P00533/L718Q	P00533	EGFR	EGFR_HUMAN	L718Q	37	β1	-	resistance	KKIKVlSGAFG	0.126	0.512	0.361	0.801	0.753	0.397	0.664	0.614	0.737	0.403	0.796	7	oncogene
P00533/L792H	P00533	EGFR	EGFR_HUMAN	L792H	235	β5/αD-loop	-	resistance	QLITQlPFGCL	0.304	0.302	0.394	0.728	0.545	0.562	0.552	0.337	0.462	0.629	0.856	7	oncogene
P00533/V765M	P00533	EGFR	EGFR_HUMAN	V765M	152	αC	-	-	LDEAYvASVDN	0.525	0.156	0.319	0.319	0.32	0.552	0.368	0.176	0.151	0.681	0.261	7	oncogene
P11309/T23I	P11309	PIM1	PIM1_HUMAN	T23I	16	N-term-β1	-	-	NDLHAtLAPGK	0.453	0.299	0.247	0.398	0.437	0.424	0.363	0.384	0.37	0.524	0.317	7	oncogene, fusion
P16234/V859M	P16234	PDGFRA	PGFRA_HUMAN	V859M	538	A-loop	-	-	STFLPvWMAPE	0.421	0.251	0.328	0.425	0.394	0.452	0.409	0.313	0.348	0.587	0.334	7	oncogene, fusion
P21127/A670V	P21127	CDK11B	CD11B_HUMAN	A670V	708	αG/αH-loop	-	-	YSELPaKKMTF	0.738	0.071	0.191	0.111	0.128	0.445	0.174	0.161	0.104	0.709	0.122	7	NA
P35916/A1158V	P35916	FLT4	VGFR3_HUMAN	A1158V	829	αH/αI-loop	-	-	SGDPKaPAFSE	0.725	0.118	0.158	0.165	0.181	0.448	0.204	0.216	0.171	0.666	0.163	7	oncogene
P36507/F57L	P36507	MAP2K2	MP2K2_HUMAN	F57L	16	N-term-β1	-	-	KRLEAfTQKAK	0.381	0.322	0.297	0.478	0.486	0.467	0.416	0.347	0.383	0.572	0.335	7	oncogene
P54762/R682C	P54762	EPHB1	EPHB1_HUMAN	R682C	180	αC/β4-loop	-	-	HPNIIrEGVVT	0.073	0.282	0.645	0.774	0.755	0.689	0.793	0.396	0.606	0.68	0.704	7	NA
Q15831/W308L	Q15831	STK11	STK11_HUMAN	W308L	851	αI	-	-	IRQHSwRKKHP	0.196	0.442	0.362	0.717	0.72	0.434	0.579	0.58	0.699	0.429	0.531	7	TSG
Q9UM73/F1174I	Q9UM73	ALK	ALK_HUMAN	F1174I	159	αC/β4-loop	-	-	LIISKfHQNIV	0.318	0.186	0.495	0.533	0.476	0.59	0.573	0.301	0.389	0.689	0.609	7	oncogene, fusion
Q9UM73/F1174V	Q9UM73	ALK	ALK_HUMAN	F1174V	159	αC/β4-loop	-	activating,resistance	LIISKfHQNIV	0.285	0.178	0.537	0.585	0.488	0.596	0.582	0.331	0.327	0.696	0.638	7	oncogene, fusion
P00519/D276G	P00519	ABL1	ABL1_HUMAN	D276G	111	β3/αC-loop	-	resistance	KTLKEdMEVEE	0.303	0.335	0.362	0.6	0.483	0.44	0.477	0.419	0.537	0.542	0.582	7	oncogene, fusion
P00533/G735S	P00533	EGFR	EGFR_HUMAN	G735S	74	β2/β3-loop	-	-	LWIPEgKVKIP	0.281	0.346	0.373	0.597	0.524	0.516	0.515	0.422	0.508	0.591	0.499	7	oncogene
P04629/R692C	P04629	NTRK1	NTRK1_HUMAN	R692C	539	A-loop	-	-	TMLPIrMPPES	0.162	0.423	0.415	0.705	0.703	0.513	0.579	0.501	0.699	0.551	0.452	7	oncogene, TSG, fusion
P15056/L505H	P15056	BRAF	BRAF_HUMAN	L505H	154	αC	-	resistance	NEVGVlKTRHV	0.18	0.439	0.381	0.747	0.658	0.481	0.642	0.45	0.653	0.498	0.79	7	oncogene, fusion
P23458/G1097V	P23458	JAK1	JAK1_HUMAN	G1097V	631	αF/αG-loop	-	-	IGPTHgMTVTR	0.441	0.259	0.3	0.384	0.368	0.424	0.318	0.318	0.32	0.606	0.336	7	oncogene, TSG
P27037/I458T	P27037	ACVR2A	AVR2A_HUMAN	I458T	819	αH	-	-	MLCETiECWDH	0.282	0.366	0.352	0.526	0.51	0.509	0.514	0.371	0.447	0.636	0.394	7	TSG
P36507/Q60P	P36507	MAP2K2	MP2K2_HUMAN	Q60P	19	N-term-β1	-	resistance	EAFLTqAKVGE	0.228	0.353	0.419	0.641	0.553	0.54	0.541	0.382	0.563	0.587	0.555	7	oncogene
P36888/K663R	P36888	FLT3	FLT3_HUMAN	K663R	151	αC	-	-	LMSELkMTQLG	0.32	0.327	0.353	0.457	0.474	0.397	0.394	0.409	0.348	0.549	0.362	7	oncogene
P43405/D603N	P43405	SYK	KSYK_HUMAN	D603N	816	αH	-	-	PREMYdMNLCW	0.89	0.036	0.074	0.145	0.104	0.36	0.161	0.125	0.126	0.661	0.186	7	oncogene, fusion
P49840/A146T	P49840	GSK3A	GSK3A_HUMAN	A146T	93	β3	-	-	TRELVaKKVLQ	0.289	0.494	0.217	0.532	0.556	0.367	0.485	0.57	0.603	0.401	0.51	7	NA
P54646/R72C	P54646	PRKAA2	AAPK2_HUMAN	R72C	162	αC/β4-loop	-	-	NLKLFrPHIIK	0.237	0.406	0.358	0.595	0.67	0.373	0.56	0.544	0.587	0.386	0.44	7	NA
P68400/H236R	P68400	CSNK2A1	CSK21_HUMAN	H236R	650	αG	-	-	PFFHGhNYDQL	0.463	0.171	0.366	0.348	0.353	0.511	0.34	0.284	0.25	0.651	0.28	7	NA
Q02763/T1106M	Q02763	TEK	TIE2_HUMAN	T1106M	865	C-term-αI	-	-	TYVNTtYEKFT	0.412	0.233	0.355	0.426	0.354	0.465	0.383	0.328	0.358	0.64	0.329	7	NA
Q5S007/R1957C	Q5S007	LRRK2	LRRK2_HUMAN	R1957C	251	αD	-	-	KGSLDrLQQDK	0.368	0.24	0.392	0.43	0.398	0.435	0.379	0.345	0.358	0.604	0.326	7	NA
Q5VT25/R123C	Q5VT25	CDC42BPA	MRCKA_HUMAN	R123C	147	αC	-	-	ETACFrERDVL	0.243	0.334	0.424	0.605	0.621	0.495	0.548	0.442	0.566	0.522	0.395	7	NA
Q8IU85/E36K	Q8IU85	CAMK1D	KCC1D_HUMAN	E36K	44	β2	-	-	TGAFSeVLAEE	0.503	0.207	0.29	0.399	0.291	0.545	0.381	0.289	0.364	0.634	0.452	7	NA
Q8NE28/R198C	Q8NE28	STKLD1	STKL1_HUMAN	R198C	536	A-loop	-	-	EEDPFrSWMAP	0.48	0.311	0.209	0.492	0.492	0.301	0.349	0.434	0.584	0.394	0.23	7	NA
O00311/S148Y	O00311	CDC7	CDC7_HUMAN	S148Y	358	αD/αE-loop	-	-	LDILNsSFQEV	0.505	0.23	0.264	0.419	0.34	0.48	0.397	0.299	0.386	0.632	0.233	7	NA
O14733/E287K	O14733	MAP2K7	MP2K7_HUMAN	E287K	544	A-loop;APE-motif	-	-	AYMAPeIDPPD	0.062	0.76	0.179	0.84	0.838	0.211	0.589	0.758	0.89	0.211	0.588	7	NA
O14733/G129S	O14733	MAP2K7	MP2K7_HUMAN	G129S	40	β1;Gly-rich-loop	-	-	GEMGSgCGQVW	0.087	0.807	0.105	0.846	0.882	0.207	0.621	0.774	0.854	0.225	0.653	7	NA
O43283/R278C	O43283	MAP3K13	M3K13_HUMAN	R278C	424	Catalytic-loop;HrD-motif	-	-	HKIIHrLKSPN	0.116	0.465	0.419	0.755	0.731	0.422	0.664	0.55	0.713	0.41	0.51	7	oncogene, TSG
O60674/L611S	O60674	JAK2	JAK2_HUMAN	L611S	180	αC/β4-loop	-	-	HKHLVlYGVCV	0.236	0.152	0.612	0.698	0.548	0.677	0.698	0.226	0.367	0.832	0.69	7	oncogene, fusion
O60674/R867Q	O60674	JAK2	JAK2_HUMAN	R867Q	53	β2	-	activating	SVEMCrDPLQD	0.302	0.23	0.468	0.462	0.451	0.558	0.531	0.312	0.391	0.705	0.323	7	oncogene, fusion
P04626/V777M	P04626	ERBB2	ERBB2_HUMAN	V777M	159	αC/β4-loop	-	-	YVMAGvSPYVS	0.426	0.205	0.369	0.383	0.356	0.569	0.449	0.263	0.278	0.688	0.506	7	oncogene, fusion
P08581/K1360E	P08581	MET	MET_HUMAN	K1360E	874	C-term-αI	-	-	TYVNVkVAPYP	0.766	0.071	0.163	0.146	0.167	0.469	0.215	0.156	0.102	0.704	0.154	7	oncogene
P09619/G687R	P09619	PDGFRB	PGFRB_HUMAN	G687R	240	β5/αD-loop	-	-	EYCRYgLVDYL	0.167	0.458	0.375	0.756	0.65	0.44	0.595	0.519	0.661	0.471	0.761	7	oncogene, fusion
P16591/R804C	P16591	FER	FER_HUMAN	R804C	832	αH/αI-loop	-	-	YKPENrKFSEL	0.118	0.633	0.25	0.77	0.791	0.327	0.584	0.647	0.797	0.31	0.453	7	NA
P31751/V140A	P31751	AKT2	AKT2_HUMAN	V140A	17	N-term-β1	-	-	EMEVAvKARAK	0.571	0.24	0.189	0.367	0.329	0.398	0.29	0.388	0.334	0.568	0.203	7	oncogene
P37173/V387M	P37173	TGFBR2	TGFR2_HUMAN	V387M	434	Catalytic-loop	-	-	SSNILvNDLTC	0.322	0.328	0.35	0.456	0.465	0.475	0.465	0.356	0.424	0.58	0.466	7	TSG
P54764/R728C	P54764	EPHA4	EPHA4_HUMAN	R728C	379	αE	-	-	LVGMLrIGSGM	0.199	0.336	0.465	0.658	0.61	0.531	0.629	0.445	0.558	0.538	0.417	7	NA
Q16832/R752C	Q16832	DDR2	DDR2_HUMAN	R752C	539	A-loop	-	-	AVLPIrMSWES	0.174	0.416	0.409	0.733	0.713	0.486	0.589	0.489	0.717	0.552	0.454	7	oncogene
Q5TCX8/E396K	Q5TCX8	MAP3K21	M3K21_HUMAN	E396K	848	αI	-	-	FALILeLTAIE	0.921	0.024	0.055	0.101	0.092	0.352	0.13	0.128	0.085	0.671	0.151	7	NA
Q8N752/E10K	Q8N752	CSNK1A1L	KC1AL_HUMAN	E10K	24	N-term-β1	-	-	SGSKAeVVGGK	0.34	0.324	0.337	0.53	0.448	0.407	0.422	0.378	0.414	0.538	0.317	7	NA
O14733/T275M	O14733	MAP2K7	MP2K7_HUMAN	T275M	528	A-loop	p	-	DSKAKtSAGCA	0.066	0.671	0.263	0.944	0.945	0.398	0.8	0.695	0.91	0.414	0.531	7	NA
O15075/G393R	O15075	DCLK1	DCLK1_HUMAN	G393R	34	β1	-	-	ERYKVgTIGDG	0.239	0.389	0.373	0.609	0.611	0.503	0.548	0.42	0.619	0.577	0.488	7	NA
O75676/R629C	O75676	RPS6KA4	KS6A4_HUMAN	R629C	676	αG/αH-loop	-	-	IMCKIrGRFSL	0.397	0.215	0.388	0.429	0.368	0.477	0.397	0.256	0.297	0.622	0.235	7	NA
P04629/E492K	P04629	NTRK1	NTRK1_HUMAN	E492K	11	N-term-β1	-	-	QGHIIePQYFS	0.505	0.161	0.334	0.337	0.309	0.502	0.321	0.322	0.29	0.659	0.257	7	oncogene, TSG, fusion
P10721/R804Q	P10721	KIT	KIT_HUMAN	R804Q	473	Catalytic-loop	-	-	LLTHGrTKICD	0.46	0.17	0.37	0.351	0.354	0.559	0.419	0.246	0.289	0.671	0.226	7	oncogene
P10721/R804W	P10721	KIT	KIT_HUMAN	R804W	473	Catalytic-loop	-	-	LLTHGrTKICD	0.278	0.305	0.417	0.622	0.584	0.48	0.6	0.402	0.506	0.536	0.38	7	oncogene
P21802/R664W	P21802	FGFR2	FGFR2_HUMAN	R664W	530	A-loop	-	-	KTTNGrPVKWM	0.143	0.597	0.26	0.836	0.767	0.338	0.698	0.617	0.828	0.305	0.48	7	oncogene, fusion
P35916/G1154R	P35916	FLT4	VGFR3_HUMAN	G1154R	825	αH/αI-loop	-	-	LNCWSgPKARP	0.859	0.036	0.105	0.128	0.115	0.41	0.16	0.118	0.088	0.705	0.145	7	oncogene
P35968/P956S	P35968	KDR	VGFR2_HUMAN	P956S	281	αD/αE-loop	-	-	YVGAIpDLKRR	0.923	0.03	0.046	0.083	0.096	0.327	0.128	0.123	0.066	0.674	0.089	7	oncogene
P35968/R961W	P35968	KDR	VGFR2_HUMAN	R961W	286	αD/αE-loop	-	-	PVDLKrLDSIT	0.368	0.248	0.383	0.451	0.415	0.5	0.467	0.321	0.35	0.626	0.297	7	oncogene
P35968/S1037L	P35968	KDR	VGFR2_HUMAN	S1037L	435	Catalytic-loop	-	-	RNILLsKNVVK	0.336	0.295	0.369	0.494	0.508	0.483	0.478	0.435	0.496	0.599	0.414	7	oncogene
P36896/G407R	P36896	ACVR1B	ACV1B_HUMAN	G407R	592	αF	-	-	DIYALgVYWEI	0.231	0.53	0.239	0.65	0.643	0.259	0.531	0.627	0.669	0.301	0.577	7	TSG
P57059/G15S	P57059	SIK1	SIK1_HUMAN	G15S	19	N-term-β1	-	neutral	DPAGQgGQQKP	0.807	0.091	0.103	0.292	0.258	0.426	0.229	0.195	0.301	0.657	0.213	7	NA
Q00535/R168H	Q00535	CDK5	CDK5_HUMAN	R168H	541	A-loop	-	-	VTLWYrPDVLF	0.25	0.404	0.346	0.594	0.614	0.471	0.486	0.51	0.53	0.496	0.366	7	NA
Q02750/S231L	Q02750	MAP2K1	MP2K1_HUMAN	S231L	542	A-loop;APE-motif	p	-	TRSYMsERLQG	0.164	0.543	0.293	0.762	0.824	0.333	0.673	0.611	0.754	0.371	0.513	7	oncogene
Q02846/L782H	Q02846	GUCY2D	GUC2D_HUMAN	L782H	816	αH	-	neutral	PVECIlMKQCW	0.897	0.021	0.082	0.086	0.118	0.319	0.148	0.114	0.062	0.697	0.175	7	NA
Q15831/P179L	Q15831	STK11	STK11_HUMAN	P179L	429	Catalytic-loop	-	-	HKDIKpNLLLT	0.193	0.423	0.383	0.669	0.735	0.43	0.665	0.495	0.659	0.428	0.565	7	TSG
Q8TD08/T221K	Q8TD08	MAPK15	MK15_HUMAN	T221K	639	αG	-	neutral	PLFPGtTLHQL	0.52	0.232	0.248	0.357	0.335	0.47	0.336	0.298	0.264	0.607	0.271	7	NA
Q9NY57/R27W	Q9NY57	STK32B	ST32B_HUMAN	R27W	35	β1	-	-	HFQILrIGKGS	0.183	0.464	0.353	0.697	0.663	0.399	0.591	0.513	0.68	0.458	0.478	7	NA
Q9P286/E468K	Q9P286	PAK5	PAK5_HUMAN	E468K	55	β2/β3-loop	-	-	VCIATeHTGKQ	0.801	0.06	0.138	0.166	0.234	0.466	0.226	0.183	0.186	0.644	0.21	7	NA
Q9P2K8/R465C	Q9P2K8	EIF2AK4	E2AK4_HUMAN	R465C	540	A-loop	-	-	EQTRVrSDNAL	0.318	0.342	0.34	0.579	0.539	0.422	0.445	0.434	0.461	0.582	0.337	7	NA
O15111/V268I	O15111	CHUK	IKKA_HUMAN	V268I	801	αG/αH-loop	-	neutral	SLCSLvEPMEN	0.891	0.028	0.081	0.111	0.1	0.334	0.149	0.113	0.085	0.672	0.147	7	NA
O43293/A136T	O43293	DAPK3	DAPK3_HUMAN	A136T	419	Catalytic-loop	-	-	HSKRIaFDLKP	0.337	0.296	0.367	0.402	0.354	0.444	0.432	0.331	0.353	0.598	0.315	7	NA
P00533/G873E	P00533	EGFR	EGFR_HUMAN	G873E	528	A-loop	-	-	EYHAEgKVPIK	0.316	0.332	0.352	0.594	0.592	0.5	0.573	0.442	0.501	0.579	0.367	7	oncogene
P23458/E897K	P23458	JAK1	JAK1_HUMAN	E897K	73	β2/β3-loop	-	-	CRYDPeDNTGE	0.826	0.077	0.097	0.179	0.164	0.388	0.15	0.184	0.185	0.63	0.155	7	oncogene, TSG
P27037/R400C	P27037	ACVR2A	AVR2A_HUMAN	R400C	604	αF/αG-loop	-	-	WELASrTAADG	0.19	0.354	0.456	0.618	0.616	0.559	0.638	0.411	0.598	0.615	0.388	7	TSG
P29320/E631K	P29320	EPHA3	EPHA3_HUMAN	E631K	41	Gly-rich-loop;β1/β2-loop	-	-	VVGAGeGEVCS	0.547	0.2	0.253	0.467	0.374	0.475	0.324	0.366	0.453	0.559	0.291	7	inconclusive
P29320/G783R	P29320	EPHA3	EPHA3_HUMAN	G783R	528	A-loop	-	-	AYTTRgKIPIR	0.173	0.452	0.374	0.735	0.764	0.457	0.687	0.527	0.697	0.543	0.502	7	inconclusive
P35916/H890Q	P35916	FLT4	VGFR3_HUMAN	H890Q	143	αC	-	neutral	ATASEhALMSE	0.499	0.154	0.347	0.31	0.289	0.569	0.351	0.225	0.234	0.72	0.298	7	oncogene
P37173/R537C	P37173	TGFBR2	TGFR2_HUMAN	R537C	851	αI	-	decrease	QCVAErSELEH	0.125	0.564	0.312	0.756	0.738	0.389	0.549	0.573	0.74	0.35	0.453	7	TSG
P54762/E605K	P54762	EPHB1	EPHB1_HUMAN	E605K	16	N-term-β1	-	-	YEDPNeVREFA	0.554	0.256	0.19	0.362	0.362	0.437	0.301	0.34	0.313	0.539	0.236	7	NA
Q04771/R258G	Q04771	ACVR1	ACVR1_HUMAN	R258G	162	αC/β4-loop	-	-	NTVMLrENILG	0.143	0.522	0.335	0.718	0.709	0.377	0.59	0.583	0.759	0.425	0.503	7	oncogene
Q15831/P275L	Q15831	STK11	STK11_HUMAN	P275L	699	αG/αH-loop	-	-	GSYAIpDCGPP	0.282	0.463	0.256	0.568	0.565	0.343	0.452	0.541	0.616	0.356	0.499	7	TSG
P05771/D470H	P05771	PRKCB	KPCB_HUMAN	D470H	430	Catalytic-loop	-	-	RDLKLdVMLDS	0.261	0.452	0.288	0.651	0.649	0.366	0.534	0.585	0.579	0.408	0.504	6	inconclusive
P08922/G2032R	P08922	ROS1	ROS1_HUMAN	G2032R	240	β5/αD-loop	-	-	ELMEGgLLTYL	0.197	0.462	0.341	0.754	0.649	0.36	0.576	0.522	0.644	0.381	0.759	6	oncogene, fusion
P10721/D816F	P10721	KIT	KIT_HUMAN	D816F	491	A-loop	-	activating	FGLARdKNDSN	0.016	0.039	0.945	0.929	0.929	0.945	0.959	0.112	0.682	0.933	0.95	6	oncogene
P10721/V560E	P10721	KIT	KIT_HUMAN	V560E	2	N-term-β1	-	-	VQWKVvEINGN	0.172	0.479	0.349	0.748	0.758	0.518	0.607	0.524	0.723	0.466	0.644	6	oncogene
P11309/G99S	P11309	PIM1	PIM1_HUMAN	G99S	170	αC/β4-loop	-	-	KKVSSgSGVIR	0.268	0.366	0.365	0.568	0.565	0.428	0.463	0.475	0.521	0.471	0.488	6	oncogene, fusion
P11309/H68Y	P11309	PIM1	PIM1_HUMAN	H68Y	97	β3	-	increase	PVAIKhEKDRI	0.353	0.171	0.475	0.453	0.494	0.581	0.455	0.28	0.404	0.639	0.251	6	oncogene, fusion
P36897/R255C	P36897	TGFBR1	TGFR1_HUMAN	R255C	162	αC/β4-loop	-	-	QTVMLrENILG	0.159	0.525	0.317	0.731	0.723	0.321	0.591	0.638	0.758	0.353	0.48	6	NA
P41743/P537S	P41743	PRKCI	KPCI_HUMAN	P537S	867	C-term-αI	-	-	QKQVVpFKPNI	0.216	0.427	0.357	0.638	0.599	0.441	0.547	0.506	0.606	0.511	0.492	6	NA
P48729/D140A	P48729	CSNK1A1	KC1A_HUMAN	D140A	430	Catalytic-loop	-	-	RDIKPdFLMGI	0.252	0.499	0.249	0.633	0.645	0.336	0.493	0.601	0.599	0.338	0.517	6	NA
P80192/D166N	P80192	MAP3K9	M3K9_HUMAN	D166N	87	β2/β3-loop	-	-	AFWIGdVAVKA	0.831	0.061	0.108	0.186	0.177	0.375	0.158	0.188	0.161	0.553	0.139	6	NA
Q06187/C481R	Q06187	BTK	BTK_HUMAN	C481R	241	β5/αD-loop	-	resistance	YMANGcLNYLR	0.243	0.442	0.315	0.707	0.58	0.413	0.576	0.52	0.617	0.486	0.849	6	oncogene, TSG
Q59H18/E657K	Q59H18	TNNI3K	TNI3K_HUMAN	E657K	597	αF	-	-	ALCLWeLTGEI	0.28	0.446	0.273	0.538	0.528	0.369	0.471	0.572	0.607	0.434	0.432	6	NA
Q96QS6/A176V	Q96QS6	PSKH2	KPSH2_HUMAN	A176V	402	Catalytic-loop	-	-	IRYLHaQITHR	0.449	0.234	0.318	0.332	0.308	0.412	0.327	0.3	0.285	0.588	0.283	6	NA
Q9H4B4/S146F	Q9H4B4	PLK3	PLK3_HUMAN	S146F	241	β5/αD-loop	-	-	LCSRKsAHIWK	0.15	0.553	0.297	0.793	0.753	0.403	0.689	0.569	0.688	0.44	0.807	6	NA
Q9UM73/Y1278S	Q9UM73	ALK	ALK_HUMAN	Y1278S	498	A-loop	p	-	MARDIyASYYR	0.153	0.228	0.619	0.787	0.813	0.593	0.789	0.377	0.641	0.658	0.76	6	oncogene, fusion
O60674/R938Q	O60674	JAK2	JAK2_HUMAN	R938Q	250	αD	-	-	PYGSLrYLQKH	0.626	0.158	0.216	0.29	0.242	0.49	0.273	0.262	0.224	0.627	0.19	6	oncogene, fusion
O96017/R346C	O96017	CHEK2	CHK2_HUMAN	R346C	424	Catalytic-loop;HrD-motif	-	-	NGIIHrLKPEN	0.122	0.529	0.349	0.767	0.79	0.425	0.623	0.599	0.767	0.42	0.512	6	TSG
P04626/D873G	P04626	ERBB2	ERBB2_HUMAN	D873G	503	A-loop	-	-	RLLDIdTEYHA	0.247	0.303	0.45	0.635	0.631	0.556	0.707	0.363	0.558	0.652	0.674	6	oncogene, fusion
P04629/G613V	P04629	NTRK1	NTRK1_HUMAN	G613V	349	αD/αE-loop	-	neutral	AKLLAgEDVAP	0.656	0.125	0.219	0.194	0.229	0.495	0.284	0.238	0.174	0.674	0.172	6	oncogene, TSG, fusion
P05771/R361Q	P05771	PRKCB	KPCB_HUMAN	R361Q	55	β2/β3-loop	-	-	VMLSErGTDEL	0.574	0.147	0.279	0.359	0.305	0.563	0.441	0.239	0.265	0.682	0.185	6	inconclusive
P06241/A315V	P06241	FYN	FYN_HUMAN	A315V	150	αC	-	-	SFLEEaIMKKL	0.469	0.204	0.327	0.35	0.294	0.502	0.366	0.266	0.27	0.613	0.265	6	NA
P10721/E561K	P10721	KIT	KIT_HUMAN	E561K	3	N-term-β1	-	-	QWKVVeINGNN	0.401	0.202	0.397	0.481	0.356	0.547	0.411	0.283	0.339	0.623	0.389	6	oncogene
P10721/K818R	P10721	KIT	KIT_HUMAN	K818R	498	A-loop	-	-	LARDIkDSNYV	0.648	0.096	0.256	0.428	0.318	0.476	0.335	0.194	0.17	0.696	0.361	6	oncogene
P10721/R634W	P10721	KIT	KIT_HUMAN	R634W	143	αC	-	-	AHLTErALMSE	0.337	0.261	0.402	0.547	0.483	0.491	0.518	0.355	0.405	0.619	0.367	6	oncogene
P10721/V559I	P10721	KIT	KIT_HUMAN	V559I	1	N-term-β1	-	-	EVQWKvEEING	0.574	0.169	0.257	0.439	0.408	0.391	0.386	0.308	0.436	0.508	0.355	6	oncogene
P11802/K22M	P11802	CDK4	CDK4_HUMAN	K22M	48	β2	ub	-	YGTVYkRDPHS	0.152	0.341	0.507	0.67	0.626	0.571	0.722	0.417	0.541	0.615	0.485	6	oncogene
P15056/Y472S	P15056	BRAF	BRAF_HUMAN	Y472S	47	β2	-	-	SFGTVyGKWHG	0.128	0.506	0.365	0.742	0.723	0.425	0.612	0.643	0.689	0.43	0.632	6	oncogene, fusion
P16234/S847L	P16234	PDGFRA	PGFRA_HUMAN	S847L	504	A-loop	-	-	DIMHDsYVSKG	0.159	0.394	0.447	0.704	0.649	0.561	0.709	0.507	0.63	0.536	0.494	6	oncogene, fusion
P35916/R1146H	P35916	FLT4	VGFR3_HUMAN	R1146H	816	αH	-	neutral	TPAIRrMLNCW	0.942	0.022	0.036	0.083	0.087	0.343	0.137	0.097	0.063	0.704	0.068	6	oncogene
P36888/I836M	P36888	FLT3	FLT3_HUMAN	I836M	492	A-loop	-	-	GLARDiSDSNY	0.347	0.24	0.414	0.516	0.47	0.553	0.545	0.36	0.416	0.618	0.388	6	oncogene
P52333/V678L	P52333	JAK3	JAK3_HUMAN	V678L	491	A-loop	-	-	GVSPAvSLEML	0.162	0.174	0.665	0.644	0.611	0.778	0.749	0.207	0.396	0.86	0.639	6	oncogene
Q15831/W239C	Q15831	STK11	STK11_HUMAN	W239C	589	αF	-	-	FKVDIwAGVTL	0.096	0.671	0.233	0.771	0.7	0.31	0.564	0.672	0.775	0.293	0.555	6	TSG
Q16288/R678Q	Q16288	NTRK3	NTRK3_HUMAN	R678Q	424	Catalytic-loop;HrD-motif	-	-	QHFVHrLATRN	0.265	0.407	0.328	0.648	0.617	0.431	0.546	0.485	0.611	0.452	0.434	6	oncogene, fusion
Q16832/R668C	Q16832	DDR2	DDR2_HUMAN	R668C	255	αD/αE-loop	-	-	NQFLSrEPPNS	0.487	0.2	0.313	0.377	0.316	0.528	0.355	0.311	0.313	0.649	0.252	6	oncogene
Q86Y07/D186E	Q86Y07	VRK2	VRK2_HUMAN	D186E	479	A-loop;DFG-motif	-	-	QVYLAdGLSYR	0.042	0.883	0.075	0.924	0.947	0.114	0.611	0.926	0.886	0.166	0.614	6	NA
Q8N4C8/T319I	Q8N4C8	MINK1	MINK1_HUMAN	T319I	882	C-term-αI	-	-	GEKEEtYEYSG	0.223	0.368	0.409	0.709	0.71	0.462	0.694	0.515	0.707	0.499	0.6	6	NA
Q8N568/S483L	Q8N568	DCLK2	DCLK2_HUMAN	S483L	354	αD/αE-loop	-	-	FDAITsTKYTE	0.322	0.285	0.393	0.493	0.56	0.451	0.509	0.419	0.454	0.607	0.386	6	NA
Q8NER5/I482V	Q8NER5	ACVR1C	ACV1C_HUMAN	I482V	852	αI	-	neutral	RIKKTiQLCVK	0.882	0.043	0.075	0.133	0.128	0.401	0.185	0.147	0.095	0.713	0.116	6	NA
Q9BXA7/E301K	Q9BXA7	TSSK1B	TSSK1_HUMAN	E301K	881	C-term-αI	-	-	PLWTPeGSDKK	0.669	0.107	0.224	0.43	0.395	0.426	0.378	0.327	0.32	0.605	0.28	6	NA
Q9BYT3/E137K	Q9BYT3	STK33	STK33_HUMAN	E137K	76	β2/β3-loop	-	-	EATDKeETKWA	0.737	0.126	0.137	0.208	0.259	0.455	0.251	0.292	0.204	0.56	0.143	6	NA
Q9C098/E422K	Q9C098	DCLK3	DCLK3_HUMAN	E422K	188	β4/β5-loop	-	-	LHEVYeDMEIY	0.244	0.311	0.446	0.55	0.52	0.508	0.516	0.412	0.486	0.595	0.438	6	NA
Q9Y243/R367Q	Q9Y243	AKT3	AKT3_HUMAN	R367Q	701	αG/αH-loop	-	-	DIKFPrLSSDA	0.565	0.18	0.254	0.258	0.21	0.486	0.296	0.22	0.212	0.692	0.161	6	oncogene
P00533/A864V	P00533	EGFR	EGFR_HUMAN	A864V	499	A-loop	-	-	AKLLGaEKEYH	0.531	0.154	0.315	0.399	0.333	0.466	0.315	0.294	0.265	0.619	0.271	6	oncogene
P00533/G796S	P00533	EGFR	EGFR_HUMAN	G796S	240	β5/αD-loop	-	resistance	QLMPFgLLDYV	0.228	0.329	0.442	0.71	0.59	0.513	0.562	0.424	0.518	0.542	0.739	6	oncogene
P00533/R831H	P00533	EGFR	EGFR_HUMAN	R831H	405	Catalytic-loop	-	-	NYLEDrLVHRD	0.403	0.204	0.393	0.397	0.46	0.506	0.509	0.287	0.402	0.646	0.275	6	oncogene
P00533/T785I	P00533	EGFR	EGFR_HUMAN	T785I	219	β4/β5-loop	-	-	ICLTStQLITQ	0.332	0.267	0.402	0.455	0.474	0.526	0.49	0.303	0.415	0.637	0.394	6	oncogene
P04049/R495H	P04049	RAF1	RAF1_HUMAN	R495H	499	A-loop	-	-	ATVKSrSGSQQ	0.298	0.32	0.382	0.624	0.525	0.521	0.516	0.397	0.399	0.53	0.39	6	oncogene, fusion
P05771/E591K	P05771	PRKCB	KPCB_HUMAN	E591K	842	αI	-	-	CGPEGeDIKEH	0.502	0.222	0.276	0.388	0.293	0.464	0.325	0.271	0.299	0.637	0.258	6	inconclusive
P07949/A883S	P07949	RET	RET_HUMAN	A883S	435	Catalytic-loop	-	-	RNILVaGRKMK	0.422	0.221	0.357	0.343	0.273	0.498	0.36	0.23	0.333	0.666	0.267	6	oncogene, fusion
P09769/R496H	P09769	FGR	FGR_HUMAN	R496H	824	αH/αI-loop	-	-	MEQTWrDPEER	0.677	0.115	0.208	0.156	0.161	0.437	0.224	0.178	0.134	0.658	0.11	6	NA
P10721/H697Y	P10721	KIT	KIT_HUMAN	H697Y	268	αD/αE-loop	-	-	SKQEDhEAALY	0.443	0.196	0.361	0.275	0.255	0.535	0.364	0.206	0.233	0.701	0.223	6	oncogene
P10721/P577S	P10721	KIT	KIT_HUMAN	P577S	19	N-term-β1	-	-	DPTQLpDHKWE	0.264	0.347	0.389	0.645	0.555	0.533	0.513	0.4	0.569	0.568	0.539	6	oncogene
P11309/S59C	P11309	PIM1	PIM1_HUMAN	S59C	76	β2/β3-loop	-	-	SGIRVsNLPVA	0.622	0.16	0.217	0.311	0.321	0.362	0.341	0.379	0.257	0.55	0.225	6	oncogene, fusion
P11802/R24C	P11802	CDK4	CDK4_HUMAN	R24C	53	β2	-	activating	TVYKArPHSGH	0.162	0.241	0.597	0.618	0.673	0.603	0.657	0.378	0.61	0.688	0.427	6	oncogene
P11802/R24H	P11802	CDK4	CDK4_HUMAN	R24H	53	β2	-	-	TVYKArPHSGH	0.383	0.236	0.382	0.424	0.445	0.536	0.437	0.355	0.367	0.68	0.325	6	oncogene
P15056/E501K	P15056	BRAF	BRAF_HUMAN	E501K	149	αC	-	-	QAFKNeGVLRK	0.108	0.661	0.232	0.766	0.791	0.293	0.633	0.688	0.797	0.313	0.563	6	oncogene, fusion
P15056/G469S	P15056	BRAF	BRAF_HUMAN	G469S	43	Gly-rich-loop;β2	-	-	GSGSFgVYKGK	0.115	0.402	0.482	0.783	0.792	0.578	0.752	0.434	0.702	0.619	0.612	6	oncogene, fusion
P21802/E731K	P21802	FGFR2	FGFR2_HUMAN	E731K	812	αH	-	-	ANCTNeYMMMR	0.391	0.284	0.325	0.424	0.398	0.502	0.355	0.31	0.378	0.592	0.324	6	oncogene, fusion
P29323/E615K	P29323	EPHB2	EPHB2_HUMAN	E615K	24	N-term-β1	-	-	REFAKeDISCV	0.206	0.407	0.387	0.697	0.656	0.506	0.611	0.481	0.623	0.532	0.503	6	NA
P36888/S941L	P36888	FLT3	FLT3_HUMAN	S941L	848	αI	-	-	FPNLTsLGCQL	0.664	0.104	0.232	0.209	0.221	0.495	0.312	0.203	0.203	0.662	0.21	6	oncogene
P52333/A1090T	P52333	JAK3	JAK3_HUMAN	A1090T	845	αI	-	-	RPSFSaGPQLD	0.916	0.025	0.059	0.112	0.106	0.331	0.165	0.099	0.095	0.686	0.085	6	oncogene
P54762/R743W	P54762	EPHB1	EPHB1_HUMAN	R743W	424	Catalytic-loop;HrD-motif	-	-	MNYVHrLAARN	0.136	0.611	0.253	0.78	0.772	0.31	0.623	0.704	0.829	0.259	0.523	6	NA
Q00534/R87Q	Q00534	CDK6	CDK6_HUMAN	R87Q	191	β4/β5-loop	-	-	VCTVSrDRETK	0.585	0.126	0.289	0.207	0.185	0.515	0.274	0.166	0.183	0.721	0.146	6	oncogene, fusion
Q13705/S423L	Q13705	ACVR2B	AVR2B_HUMAN	S423L	671	αG/αH-loop	-	-	IGQHPsEELQE	0.21	0.383	0.407	0.618	0.639	0.493	0.558	0.486	0.556	0.533	0.497	6	NA
Q15303/G918E	Q15303	ERBB4	ERBB4_HUMAN	G918E	606	αF/αG-loop	-	-	LMTFGgPYDGI	0.455	0.159	0.386	0.344	0.295	0.589	0.386	0.255	0.305	0.655	0.317	6	oncogene, TSG
Q16288/E810K	Q16288	NTRK3	NTRK3_HUMAN	E810K	826	αH/αI-loop	-	-	GCWQReQQRLN	0.574	0.141	0.285	0.217	0.271	0.533	0.307	0.223	0.221	0.714	0.235	6	oncogene, fusion
Q16832/R752H	Q16832	DDR2	DDR2_HUMAN	R752H	539	A-loop	-	-	AVLPIrMSWES	0.209	0.373	0.418	0.649	0.649	0.506	0.528	0.449	0.605	0.565	0.405	6	oncogene
Q8NE63/R302Q	Q8NE63	HIPK4	HIPK4_HUMAN	R302Q	787	αG/αH-loop	-	neutral	GSVASrTFPDR	0.913	0.025	0.063	0.116	0.1	0.434	0.166	0.112	0.079	0.707	0.069	6	NA
Q9NY57/R220W	Q9NY57	STK32B	ST32B_HUMAN	R220W	601	αF	-	-	AYELLrWRPYE	0.306	0.254	0.44	0.6	0.505	0.485	0.559	0.345	0.406	0.603	0.371	6	NA
Q9P286/E613K	Q9P286	PAK5	PAK5_HUMAN	E613K	544	A-loop;APE-motif	-	-	YWMAPeISRLP	0.069	0.75	0.181	0.84	0.83	0.238	0.597	0.758	0.895	0.235	0.595	6	NA
Q9UM73/T1151M	Q9UM73	ALK	ALK_HUMAN	T1151M	97	β3	-	-	QVAVKtPEVCS	0.39	0.265	0.345	0.452	0.429	0.439	0.428	0.379	0.421	0.602	0.31	6	oncogene, fusion
O60285/V129M	O60285	NUAK1	NUAK1_HUMAN	V129M	228	β5	-	-	NKDKIvIMEYA	0.29	0.264	0.446	0.488	0.407	0.541	0.432	0.345	0.43	0.653	0.439	6	NA
O75676/S236L	O75676	RPS6KA4	KS6A4_HUMAN	S236L	608	αF/αG-loop	-	-	LLTGAsFTLEG	0.27	0.275	0.454	0.536	0.543	0.516	0.523	0.416	0.475	0.637	0.432	6	NA
P00533/A767V	P00533	EGFR	EGFR_HUMAN	A767V	155	αC/β4-loop	-	-	EAYVMaVDNPH	0.28	0.275	0.445	0.558	0.505	0.507	0.533	0.36	0.423	0.629	0.406	6	oncogene
P00533/A839T	P00533	EGFR	EGFR_HUMAN	A839T	428	Catalytic-loop	-	-	VHRDLaRNVLV	0.216	0.582	0.202	0.694	0.702	0.325	0.472	0.66	0.658	0.355	0.432	6	oncogene
P00533/E746V	P00533	EGFR	EGFR_HUMAN	E746V	97	β3	-	-	PVAIKeREATS	0.554	0.126	0.32	0.363	0.423	0.476	0.348	0.287	0.372	0.603	0.26	6	oncogene
P00533/G863D	P00533	EGFR	EGFR_HUMAN	G863D	498	A-loop	-	-	LAKLLgEEKEY	0.507	0.126	0.367	0.515	0.412	0.558	0.446	0.206	0.279	0.733	0.477	6	oncogene
P00533/V786M	P00533	EGFR	EGFR_HUMAN	V786M	227	β4/β5-loop	-	-	CLTSTvLITQL	0.722	0.078	0.201	0.181	0.187	0.413	0.233	0.175	0.162	0.666	0.239	6	oncogene
P04629/R583H	P04629	NTRK1	NTRK1_HUMAN	R583H	218	β4/β5-loop	-	-	VCTEGrLLMVF	0.832	0.067	0.101	0.166	0.182	0.47	0.219	0.158	0.151	0.633	0.13	6	oncogene, TSG, fusion
P05771/D484N	P05771	PRKCB	KPCB_HUMAN	D484N	479	A-loop;DFG-motif	-	-	HIKIAdGMCKE	0.033	0.911	0.056	0.941	0.951	0.133	0.624	0.902	0.921	0.135	0.598	6	inconclusive
P10721/P573L	P10721	KIT	KIT_HUMAN	P573L	15	N-term-β1	-	-	YVYIDpQLPYD	0.361	0.23	0.41	0.516	0.549	0.539	0.472	0.377	0.445	0.632	0.395	6	oncogene
P10721/R634Q	P10721	KIT	KIT_HUMAN	R634Q	143	αC	-	-	AHLTErALMSE	0.777	0.071	0.152	0.144	0.181	0.505	0.238	0.185	0.126	0.688	0.132	6	oncogene
P15056/N581Y	P15056	BRAF	BRAF_HUMAN	N581Y	431	Catalytic-loop	-	-	DLKSNnFLHED	0.064	0.729	0.207	0.824	0.881	0.26	0.698	0.736	0.813	0.308	0.571	6	oncogene, fusion
P29320/R639H	P29320	EPHA3	EPHA3_HUMAN	R639H	53	β2	-	-	EVCSGrKLPSK	0.668	0.088	0.244	0.245	0.235	0.537	0.303	0.228	0.243	0.702	0.193	6	inconclusive
P30530/R610Q	P30530	AXL	UFO_HUMAN	R610Q	220	β4/β5-loop	-	-	FQGSErSFPAP	0.853	0.043	0.105	0.102	0.124	0.396	0.164	0.102	0.115	0.691	0.069	6	NA
P36888/E598K	P36888	FLT3	FLT3_HUMAN	E598K	19	N-term-β1	-	-	DFREYeDLKWE	0.656	0.102	0.242	0.386	0.341	0.558	0.375	0.23	0.334	0.697	0.209	6	oncogene
P36888/S963L	P36888	FLT3	FLT3_HUMAN	S963L	870	C-term-αI	-	-	VDGRVsCPHTY	0.621	0.155	0.224	0.258	0.336	0.437	0.296	0.31	0.227	0.612	0.203	6	oncogene
P43403/E567K	P43403	ZAP70	ZAP70_HUMAN	E567K	812	αH	-	-	PECPPeYALMS	0.745	0.097	0.159	0.165	0.18	0.413	0.195	0.2	0.17	0.62	0.224	6	NA
P45985/R287H	P45985	MAP2K4	MP2K4_HUMAN	R287H	584	αF	-	-	QGYDVrDVWSL	0.741	0.122	0.137	0.282	0.265	0.376	0.259	0.2	0.179	0.609	0.139	6	oncogene, TSG
P53779/A305V	P53779	MAPK10	MK10_HUMAN	A305V	714	αG/αH-loop	-	-	NRPKYaLTFPK	0.448	0.217	0.335	0.283	0.242	0.494	0.301	0.241	0.246	0.69	0.232	6	NA
P57078/S103F	P57078	RIPK4	RIPK4_HUMAN	S103F	241	β5/αD-loop	-	-	YMETGsEKLLA	0.219	0.452	0.33	0.726	0.64	0.433	0.681	0.516	0.567	0.471	0.786	6	NA
Q08881/E597K	Q08881	ITK	ITK_HUMAN	E597K	825	αH/αI-loop	-	-	NHCWKePEDRP	0.615	0.134	0.251	0.24	0.209	0.487	0.262	0.211	0.213	0.676	0.22	6	fusion
Q15303/T731M	Q15303	ERBB4	ERBB4_HUMAN	T731M	44	β2	p	-	SGAFGtYKGIW	0.23	0.383	0.387	0.612	0.64	0.52	0.647	0.409	0.528	0.614	0.424	6	oncogene, TSG
Q15831/L245F	Q15831	STK11	STK11_HUMAN	L245F	595	αF	-	-	SAGVTlNITTG	0.364	0.253	0.383	0.445	0.43	0.471	0.458	0.317	0.369	0.575	0.378	6	TSG
Q16288/G608S	Q16288	NTRK3	NTRK3_HUMAN	G608S	187	β4/β5-loop	-	-	FYGVCgGDPLI	0.872	0.027	0.101	0.11	0.114	0.459	0.218	0.097	0.068	0.761	0.124	6	oncogene, fusion
Q6P3R8/G140R	Q6P3R8	NEK5	NEK5_HUMAN	G140R	464	Catalytic-loop	-	-	FLSKNgVAKLG	0.269	0.316	0.415	0.605	0.529	0.56	0.599	0.374	0.492	0.614	0.594	6	NA
Q8N752/R148H	Q8N752	CSNK1A1L	KC1AL_HUMAN	R148H	464	Catalytic-loop	-	-	LMGTGrCNKLF	0.432	0.237	0.331	0.443	0.381	0.47	0.371	0.323	0.303	0.637	0.312	6	NA
Q92772/R149Q	Q92772	CDKL2	CDKL2_HUMAN	R149Q	485	A-loop	-	-	DFGFArLAAPG	0.126	0.367	0.507	0.773	0.814	0.539	0.771	0.469	0.819	0.566	0.44	6	NA
Q96L34/R163Q	Q96L34	MARK4	MARK4_HUMAN	R163Q	379	αE	-	-	ARAKFrIVSAV	0.249	0.315	0.436	0.589	0.581	0.564	0.572	0.413	0.526	0.605	0.313	6	NA
Q9NYV4/R773C	Q9NYV4	CDK12	CDK12_HUMAN	R773C	148	αC	-	-	PITAIrIKILR	0.113	0.607	0.28	0.742	0.695	0.344	0.608	0.607	0.748	0.318	0.536	6	TSG
Q9P286/A466T	Q9P286	PAK5	PAK5_HUMAN	A466T	51	β2	-	-	GIVCIaEKHTG	0.266	0.387	0.347	0.556	0.501	0.424	0.496	0.422	0.498	0.512	0.468	6	NA
P00533/D837N	P00533	EGFR	EGFR_HUMAN	D837N	426	Catalytic-loop;HrD-motif	-	-	RLVHRdAARNV	0.063	0.818	0.119	0.886	0.925	0.216	0.601	0.821	0.883	0.2	0.538	6	oncogene
P00533/V742I	P00533	EGFR	EGFR_HUMAN	V742I	92	β3	-	-	KVKIPvIKELR	0.48	0.249	0.271	0.423	0.337	0.455	0.374	0.363	0.348	0.528	0.379	6	oncogene
P04049/L613V	P04049	RAF1	RAF1_HUMAN	L613V	858	αI	-	increase	LLQHSlKINRS	0.482	0.123	0.395	0.262	0.31	0.592	0.397	0.23	0.164	0.703	0.23	6	oncogene, fusion
P04629/R654H	P04629	NTRK1	NTRK1_HUMAN	R654H	430	Catalytic-loop	-	-	RDLATrCLVGQ	0.149	0.622	0.229	0.783	0.78	0.324	0.607	0.673	0.781	0.298	0.525	6	oncogene, TSG, fusion
P08922/G2148E	P08922	ROS1	ROS1_HUMAN	G2148E	592	αF	-	-	DVWSFgLIWEI	0.202	0.571	0.227	0.653	0.694	0.25	0.567	0.63	0.671	0.313	0.518	6	oncogene, fusion
P10721/R888Q	P10721	KIT	KIT_HUMAN	R888Q	664	αG/αH-loop	-	-	IKEGFrLSPEH	0.23	0.381	0.389	0.674	0.644	0.491	0.557	0.46	0.539	0.576	0.393	6	oncogene
P11309/E246K	P11309	PIM1	PIM1_HUMAN	E246K	637	αF/αG-loop	-	-	PFEHDeIIRGQ	0.515	0.24	0.245	0.318	0.3	0.47	0.287	0.287	0.232	0.635	0.211	6	oncogene, fusion
P11362/E467K	P11362	FGFR1	FGFR1_HUMAN	E467K	19	N-term-β1	-	-	EYELPePRWEL	0.694	0.113	0.192	0.34	0.277	0.545	0.317	0.245	0.335	0.671	0.245	6	oncogene, fusion
P15056/D594V	P15056	BRAF	BRAF_HUMAN	D594V	479	A-loop;DFG-motif	-	-	TVKIGdGLATV	0.028	0.948	0.024	0.931	0.941	0.06	0.566	0.942	0.901	0.052	0.581	6	oncogene, fusion
P16066/R798H	P16066	NPR1	ANPRA_HUMAN	R798H	847	αI	-	-	PFQQIrTLRKF	0.486	0.189	0.324	0.332	0.274	0.52	0.404	0.274	0.26	0.663	0.211	6	NA
P29320/R769H	P29320	EPHA3	EPHA3_HUMAN	R769H	485	A-loop	-	-	DFGLSrLEDDP	0.157	0.362	0.48	0.722	0.714	0.532	0.733	0.454	0.756	0.548	0.51	6	inconclusive
P43403/R360H	P43403	ZAP70	ZAP70_HUMAN	R360H	75	β2/β3-loop	-	-	GVYRMrKQIDV	0.648	0.078	0.273	0.23	0.206	0.548	0.256	0.173	0.158	0.651	0.143	6	NA
Q15303/R847C	Q15303	ERBB4	ERBB4_HUMAN	R847C	430	Catalytic-loop	-	-	RDLAArVLVKS	0.136	0.655	0.209	0.79	0.789	0.309	0.576	0.684	0.794	0.24	0.512	6	oncogene, TSG
Q16832/D678N	Q16832	DDR2	DDR2_HUMAN	D678N	354	αD/αE-loop	-	-	NSSSSdRTVSY	0.883	0.06	0.057	0.131	0.132	0.342	0.155	0.149	0.1	0.68	0.139	6	oncogene
Q6P0Q8/I659M	Q6P0Q8	MAST2	MAST2_HUMAN	I659M	489	A-loop	-	neutral	FGLSKiLMSLT	0.799	0.064	0.137	0.233	0.23	0.383	0.283	0.157	0.178	0.689	0.249	6	NA
Q8NB16/R442W	Q8NB16	MLKL	MLKL_HUMAN	R442W	814	αH	-	-	CPSELrIIDEC	0.56	0.173	0.267	0.293	0.274	0.408	0.32	0.261	0.238	0.622	0.222	6	NA
Q8NER5/R477C	Q8NER5	ACVR1C	ACV1C_HUMAN	R477C	845	αI	-	-	RLTALrKKTIS	0.282	0.284	0.434	0.445	0.386	0.484	0.489	0.35	0.397	0.569	0.335	6	NA
Q8WXR4/K309E	Q8WXR4	MYO3B	MYO3B_HUMAN	K309E	868	C-term-αI	-	neutral	QKQLAkLQDQK	0.806	0.041	0.153	0.131	0.151	0.427	0.204	0.148	0.098	0.7	0.159	6	NA
Q9BQI3/K558R	Q9BQI3	EIF2AK1	E2AK1_HUMAN	K558R	816	αH	-	neutral	CPVQAkIQHLT	0.871	0.058	0.07	0.11	0.124	0.429	0.138	0.158	0.091	0.678	0.085	6	NA
Q9Y243/R247H	Q9Y243	AKT3	AKT3_HUMAN	R247H	370	αE	-	-	VFSEDrRFYGA	0.249	0.318	0.433	0.564	0.513	0.527	0.557	0.375	0.47	0.623	0.421	6	oncogene
O14578/E110K	O14578	CIT	CTRO_HUMAN	E110K	44	β2	-	-	CGHFAeQVVRE	0.665	0.13	0.205	0.316	0.285	0.516	0.275	0.235	0.268	0.603	0.395	5	NA
O15111/T209I	O15111	CHUK	IKKA_HUMAN	T209I	593	αF	-	-	YWSFGtVFECI	0.439	0.266	0.295	0.395	0.42	0.45	0.37	0.31	0.33	0.574	0.245	5	NA
O15146/A628T	O15146	MUSK	MUSK_HUMAN	A628T	151	αC	-	-	FQREAaMAEFD	0.795	0.065	0.14	0.226	0.202	0.401	0.148	0.198	0.147	0.636	0.162	5	NA
O60674/R683T	O60674	JAK2	JAK2_HUMAN	R683T	439	Catalytic-loop	-	-	NILLIrEDRKT	0.351	0.244	0.404	0.473	0.375	0.539	0.452	0.282	0.389	0.648	0.294	5	oncogene, fusion
O95747/E313K	O95747	OXSR1	OXSR1_HUMAN	E313K	874	C-term-αI	-	-	APTISeAKKVR	0.749	0.092	0.159	0.221	0.205	0.449	0.226	0.2	0.194	0.671	0.189	5	NA
P00533/C797G	P00533	EGFR	EGFR_HUMAN	C797G	241	β5/αD-loop	-	resistance	LMPFGcLDYVR	0.247	0.45	0.302	0.73	0.634	0.451	0.576	0.541	0.605	0.445	0.855	5	oncogene
P00533/G857E	P00533	EGFR	EGFR_HUMAN	G857E	481	A-loop;DFG-motif	-	-	KITDFgAKLLG	0.092	0.451	0.457	0.82	0.827	0.522	0.726	0.556	0.8	0.542	0.634	5	oncogene
P00533/R836C	P00533	EGFR	EGFR_HUMAN	R836C	424	Catalytic-loop;HrD-motif	-	-	RRLVHrLAARN	0.116	0.555	0.329	0.808	0.798	0.412	0.618	0.585	0.797	0.394	0.533	5	oncogene
P04629/R686H	P04629	NTRK1	NTRK1_HUMAN	R686H	528	A-loop	-	-	YRVGGrMLPIR	0.609	0.174	0.216	0.358	0.376	0.391	0.408	0.339	0.317	0.543	0.212	5	oncogene, TSG, fusion
P10721/D572G	P10721	KIT	KIT_HUMAN	D572G	14	N-term-β1	-	-	NYVYIdTQLPY	0.239	0.278	0.484	0.634	0.537	0.546	0.576	0.404	0.565	0.603	0.563	5	oncogene
P10721/D816E	P10721	KIT	KIT_HUMAN	D816E	491	A-loop	-	resistance	FGLARdKNDSN	0.068	0.069	0.863	0.837	0.709	0.947	0.859	0.113	0.434	0.921	0.89	5	oncogene
P11309/E70D	P11309	PIM1	PIM1_HUMAN	E70D	102	β3/αC-loop	-	-	AIKHVeDRISD	0.814	0.076	0.11	0.244	0.255	0.41	0.264	0.19	0.178	0.606	0.178	5	oncogene, fusion
P11309/G50D	P11309	PIM1	PIM1_HUMAN	G50D	43	Gly-rich-loop;β2	-	-	GSGGFgVYSGI	0.072	0.717	0.21	0.846	0.802	0.307	0.666	0.66	0.834	0.337	0.635	5	oncogene, fusion
P11309/G55D	P11309	PIM1	PIM1_HUMAN	G55D	51	β2	-	-	GSVYSgRVSDN	0.377	0.307	0.315	0.457	0.465	0.469	0.457	0.354	0.408	0.62	0.379	5	oncogene, fusion
P11309/L20V	P11309	PIM1	PIM1_HUMAN	L20V	13	N-term-β1	-	-	APCNDlATKLA	0.737	0.146	0.117	0.199	0.232	0.412	0.203	0.297	0.189	0.629	0.258	5	oncogene, fusion
P11309/S101F	P11309	PIM1	PIM1_HUMAN	S101F	172	αC/β4-loop	-	-	VSSGFsVIRLL	0.628	0.143	0.228	0.317	0.264	0.496	0.37	0.298	0.254	0.652	0.324	5	oncogene, fusion
P11309/T196I	P11309	PIM1	PIM1_HUMAN	T196I	503	A-loop	-	-	ALLKDtYTDFD	0.239	0.36	0.4	0.634	0.669	0.492	0.671	0.461	0.586	0.533	0.564	5	oncogene, fusion
P11309/V96L	P11309	PIM1	PIM1_HUMAN	V96L	159	αC/β4-loop	-	-	VLLKKvSGFSG	0.376	0.224	0.4	0.365	0.295	0.565	0.446	0.292	0.246	0.676	0.453	5	oncogene, fusion
P11362/N546D	P11362	FGFR1	FGFR1_HUMAN	N546D	180	αC/β4-loop	-	-	HKNIInLGACT	0.145	0.196	0.659	0.694	0.594	0.724	0.787	0.248	0.39	0.786	0.759	5	oncogene, fusion
P16234/P864S	P16234	PDGFRA	PGFRA_HUMAN	P864S	543	A-loop;APE-motif	-	-	VKWMApSIFDN	0.233	0.51	0.257	0.63	0.588	0.386	0.543	0.574	0.57	0.393	0.433	5	oncogene, fusion
P21802/P708S	P21802	FGFR2	FGFR2_HUMAN	P708S	637	αF/αG-loop	-	-	PYPGIpEELFK	0.353	0.275	0.371	0.484	0.458	0.473	0.465	0.357	0.308	0.61	0.341	5	oncogene, fusion
P22455/E681K	P22455	FGFR4	FGFR4_HUMAN	E681K	597	αF	-	-	GILLWeFTLGG	0.145	0.567	0.288	0.667	0.667	0.37	0.562	0.589	0.747	0.395	0.502	5	oncogene
P31152/S202F	P31152	MAPK4	MK04_HUMAN	S202F	575	A-loop	-	-	PRLLLsNNYTK	0.349	0.303	0.349	0.543	0.505	0.482	0.505	0.436	0.453	0.576	0.397	5	NA
P36888/E800K	P36888	FLT3	FLT3_HUMAN	E800K	389	αE	-	-	VAKGMeLEFKS	0.353	0.257	0.389	0.389	0.471	0.481	0.449	0.327	0.372	0.614	0.333	5	oncogene
P36888/G617V	P36888	FLT3	FLT3_HUMAN	G617V	38	β1;Gly-rich-loop	-	-	FGKVLgGAFGK	0.124	0.442	0.434	0.803	0.762	0.453	0.636	0.547	0.708	0.489	0.654	5	oncogene
P36888/R834Q	P36888	FLT3	FLT3_HUMAN	R834Q	485	A-loop	-	-	DFGLArIMSDS	0.14	0.327	0.533	0.763	0.739	0.588	0.78	0.469	0.796	0.552	0.512	5	oncogene
P36888/V592I	P36888	FLT3	FLT3_HUMAN	V592I	13	N-term-β1	-	-	NEYFYvFREYE	0.837	0.068	0.096	0.169	0.217	0.364	0.211	0.196	0.111	0.684	0.202	5	oncogene
P36888/Y599F	P36888	FLT3	FLT3_HUMAN	Y599F	20	N-term-β1	p	decrease	FREYEyLKWEF	0.141	0.375	0.484	0.763	0.791	0.519	0.832	0.475	0.745	0.552	0.526	5	oncogene
P36888/Y842C	P36888	FLT3	FLT3_HUMAN	Y842C	508	A-loop	p	-	MSDSNyVRGNA	0.062	0.495	0.443	0.929	0.929	0.441	0.836	0.673	0.915	0.415	0.629	5	oncogene
P43405/G578E	P43405	SYK	KSYK_HUMAN	G578E	638	αG	-	-	YRGMKgEVTAM	0.194	0.369	0.437	0.611	0.573	0.529	0.569	0.394	0.556	0.645	0.429	5	oncogene, fusion
P45985/H227D	P45985	MAP2K4	MP2K4_HUMAN	H227D	423	Catalytic-loop;HrD-motif	-	-	NLKIIhDIKPS	0.079	0.735	0.186	0.746	0.731	0.248	0.558	0.693	0.798	0.293	0.512	5	oncogene, TSG
P49841/D90N	P49841	GSK3B	GSK3B_HUMAN	D90N	107	β3/αC-loop	-	-	KKVLQdRFKNR	0.248	0.417	0.336	0.673	0.588	0.451	0.536	0.472	0.575	0.545	0.529	5	NA
P52333/D846N	P52333	JAK3	JAK3_HUMAN	D846N	75	β2/β3-loop	-	-	YDPLGdTGALV	0.333	0.231	0.436	0.45	0.357	0.543	0.463	0.279	0.334	0.63	0.334	5	oncogene
Q00534/E189K	Q00534	CDK6	CDK6_HUMAN	E189K	544	A-loop;APE-motif	-	-	WYRAPeLLQSS	0.107	0.674	0.219	0.782	0.776	0.253	0.58	0.742	0.796	0.248	0.584	5	oncogene, fusion
Q00537/R299C	Q00537	CDK17	CDK17_HUMAN	R299C	383	αE	-	-	LYQILrLAYCH	0.228	0.392	0.38	0.631	0.681	0.498	0.571	0.451	0.572	0.52	0.408	5	NA
Q02750/F53Y	Q02750	MAP2K1	MP2K1_HUMAN	F53Y	16	N-term-β1	-	-	KRLEAfTQKQK	0.327	0.399	0.275	0.528	0.544	0.45	0.422	0.427	0.479	0.54	0.375	5	oncogene
Q02750/I111S	Q02750	MAP2K1	MP2K1_HUMAN	I111S	146	αC	-	-	AIRNQiRELQV	0.176	0.472	0.352	0.669	0.627	0.422	0.583	0.545	0.654	0.44	0.599	5	oncogene
Q02763/R1076W	Q02763	TEK	TIE2_HUMAN	R1076W	824	αH/αI-loop	-	-	MRQCWrKPYER	0.288	0.384	0.328	0.552	0.495	0.415	0.451	0.414	0.437	0.544	0.389	5	NA
Q02763/R1099Q	Q02763	TEK	TIE2_HUMAN	R1099Q	858	αI	-	-	RMLEErTYVNT	0.52	0.179	0.3	0.254	0.228	0.556	0.361	0.211	0.178	0.711	0.18	5	NA
Q13177/G328R	Q13177	PAK2	PAK2_HUMAN	G328R	239	β5/αD-loop	-	-	MEYLAgSLTDV	0.201	0.425	0.374	0.654	0.636	0.448	0.614	0.479	0.659	0.529	0.688	5	NA
Q14289/P506L	Q14289	PTK2B	FAK2_HUMAN	P506L	238	β5/αD-loop	-	-	IMELYpGELGH	0.432	0.248	0.32	0.427	0.375	0.46	0.379	0.36	0.368	0.602	0.443	5	NA
Q15569/E297K	Q15569	TESK1	TESK1_HUMAN	E297K	826	αH/αI-loop	-	-	HCCNLeSTRAP	0.637	0.113	0.25	0.233	0.233	0.552	0.303	0.215	0.174	0.713	0.264	5	NA
Q16288/R793Q	Q16288	NTRK3	NTRK3_HUMAN	R793Q	701	αG/αH-loop	-	-	VLERPrCPKEV	0.721	0.12	0.159	0.179	0.178	0.507	0.234	0.197	0.146	0.683	0.089	5	oncogene, fusion
Q16288/S701F	Q16288	NTRK3	NTRK3_HUMAN	S701F	484	A-loop	-	-	GDFGMsDVYST	0.17	0.502	0.328	0.798	0.786	0.502	0.746	0.496	0.732	0.528	0.634	5	oncogene, fusion
Q16539/D227N	Q16539	MAPK14	MK14_HUMAN	D227N	642	αG	-	-	LFPGTdIDQLK	0.353	0.298	0.349	0.533	0.419	0.495	0.424	0.351	0.395	0.598	0.332	5	NA
Q16566/G228E	Q16566	CAMK4	KCC4_HUMAN	G228E	592	αF	-	-	DMWSVgITYIL	0.146	0.601	0.253	0.657	0.706	0.281	0.599	0.632	0.694	0.391	0.533	5	NA
Q52WX2/G240S	Q52WX2	SBK1	SBK1_HUMAN	G240S	592	αF	-	-	DVWAFgLIFCV	0.254	0.45	0.296	0.582	0.589	0.357	0.541	0.509	0.583	0.431	0.483	5	NA
Q6DT37/R210C	Q6DT37	CDC42BPG	MRCKG_HUMAN	R210C	476	Catalytic-loop	-	-	VNGHIrADFGS	0.26	0.255	0.484	0.648	0.593	0.571	0.636	0.352	0.534	0.628	0.432	5	NA
Q92918/N293T	Q92918	MAP4K1	M4K1_HUMAN	N293T	872	C-term-αI	-	-	LDKLKnGKGPS	0.544	0.172	0.284	0.28	0.236	0.54	0.377	0.251	0.22	0.66	0.346	5	NA
Q9HAZ1/D323N	Q9HAZ1	CLK4	CLK4_HUMAN	D323N	479	A-loop;DFG-motif	-	-	DIKVVdGSATY	0.024	0.913	0.063	0.944	0.962	0.124	0.627	0.912	0.935	0.116	0.609	5	NA
Q9UEW8/P277L	Q9UEW8	STK39	STK39_HUMAN	P277L	637	αF/αG-loop	-	-	PYHKYpMKVLM	0.329	0.389	0.282	0.495	0.557	0.441	0.48	0.486	0.514	0.438	0.429	5	NA
Q9UM73/F1245L	Q9UM73	ALK	ALK_HUMAN	F1245L	418	Catalytic-loop	-	-	LEENHfHRDIA	0.301	0.268	0.431	0.57	0.506	0.48	0.469	0.425	0.454	0.561	0.446	5	oncogene, fusion
O15264/S41L	O15264	MAPK13	MK13_HUMAN	S41L	48	β2	-	-	YGSVCsIDKRS	0.431	0.136	0.433	0.405	0.326	0.544	0.5	0.235	0.286	0.717	0.28	5	NA
O75676/R86C	O75676	RPS6KA4	KS6A4_HUMAN	R86C	150	αC	-	-	HTRTErVLELV	0.196	0.369	0.435	0.573	0.559	0.513	0.539	0.434	0.602	0.574	0.389	5	NA
O96017/A392V	O96017	CHEK2	CHK2_HUMAN	A392V	542	A-loop;APE-motif	-	-	TPTYLaEVLVS	0.164	0.55	0.287	0.74	0.702	0.414	0.587	0.574	0.681	0.477	0.529	5	TSG
P00533/P741L	P00533	EGFR	EGFR_HUMAN	P741L	91	β3	-	-	EKVKIpAIKEL	0.247	0.423	0.331	0.644	0.616	0.433	0.527	0.555	0.601	0.441	0.534	5	oncogene
P00533/T847I	P00533	EGFR	EGFR_HUMAN	T847I	439	Catalytic-loop	-	-	NVLVKtQHVKI	0.381	0.249	0.37	0.473	0.497	0.5	0.507	0.33	0.384	0.628	0.376	5	oncogene
P04629/R761Q	P04629	NTRK1	NTRK1_HUMAN	R761Q	820	αH	-	-	VYAIMrCWQRE	0.901	0.027	0.072	0.116	0.136	0.446	0.177	0.127	0.09	0.696	0.097	5	oncogene, TSG, fusion
P07333/A629S	P07333	CSF1R	CSF1R_HUMAN	A629S	145	αC	-	-	ADEKEaMSELK	0.325	0.257	0.419	0.468	0.436	0.522	0.498	0.316	0.354	0.66	0.389	5	oncogene
P07333/E725K	P07333	CSF1R	CSF1R_HUMAN	E725K	333	αD/αE-loop	-	-	VDTYVeRPVST	0.442	0.208	0.35	0.37	0.358	0.53	0.386	0.255	0.279	0.659	0.331	5	oncogene
P07949/V804M	P07949	RET	RET_HUMAN	V804M	233	β5	-	-	PLLLIvYAKYG	0.579	0.13	0.291	0.602	0.285	0.487	0.29	0.26	0.213	0.698	0.795	5	oncogene, fusion
P11309/K29N	P11309	PIM1	PIM1_HUMAN	K29N	22	N-term-β1	-	-	KLAPGkKEPLE	0.578	0.232	0.19	0.382	0.378	0.483	0.361	0.378	0.309	0.592	0.255	5	oncogene, fusion
P14616/G1090E	P14616	INSRR	INSRR_HUMAN	G1090E	367	αE	-	-	PQPALgMIQMA	0.799	0.029	0.172	0.167	0.138	0.475	0.276	0.114	0.088	0.759	0.159	5	NA
P15056/A598T	P15056	BRAF	BRAF_HUMAN	A598T	484	A-loop	-	-	GDFGLaVKSRW	0.336	0.228	0.435	0.615	0.58	0.6	0.569	0.376	0.456	0.632	0.416	5	oncogene, fusion
P15056/G596D	P15056	BRAF	BRAF_HUMAN	G596D	481	A-loop;DFG-motif	-	-	KIGDFgATVKS	0.07	0.433	0.497	0.836	0.85	0.577	0.753	0.541	0.823	0.562	0.657	5	oncogene, fusion
P15056/L618W	P15056	BRAF	BRAF_HUMAN	L618W	539	A-loop	-	-	LSGSIlMAPEV	0.3	0.281	0.419	0.565	0.543	0.549	0.542	0.389	0.481	0.602	0.483	5	oncogene, fusion
P16234/D842Y	P16234	PDGFRA	PGFRA_HUMAN	D842Y	491	A-loop	-	activating	FGLARdMHDSN	0.016	0.03	0.954	0.926	0.917	0.967	0.958	0.1	0.638	0.966	0.946	5	oncogene, fusion
P17948/E943K	P17948	FLT1	VGFR1_HUMAN	E943K	275	αD/αE-loop	-	-	MEPKKeMEPGL	0.903	0.026	0.071	0.115	0.103	0.396	0.143	0.137	0.085	0.726	0.143	5	NA
P17948/R1112C	P17948	FLT1	VGFR1_HUMAN	R1112C	654	αG	-	-	EDFCSrREGMR	0.389	0.236	0.375	0.491	0.519	0.488	0.464	0.353	0.412	0.626	0.313	5	NA
P29320/L642R	P29320	EPHA3	EPHA3_HUMAN	L642R	73	β2/β3-loop	-	-	SGRLKlSKKEI	0.321	0.264	0.415	0.511	0.458	0.483	0.442	0.405	0.418	0.609	0.436	5	inconclusive
P29322/V917I	P29322	EPHA8	EPHA8_HUMAN	V917I	875	C-term-αI	-	-	PPPAFvSCFDL	0.911	0.025	0.064	0.119	0.114	0.383	0.177	0.108	0.109	0.72	0.113	5	NA
P33981/S519L	P33981	TTK	TTK_HUMAN	S519L	25	N-term-β1	-	-	ANECIsKGRIY	0.57	0.165	0.265	0.291	0.326	0.444	0.369	0.324	0.236	0.55	0.204	5	NA
P35916/E829K	P35916	FLT4	VGFR3_HUMAN	E829K	15	N-term-β1	-	-	LEEQCeLSYDA	0.328	0.286	0.386	0.49	0.459	0.511	0.483	0.333	0.362	0.622	0.327	5	oncogene
P35916/P954S	P35916	FLT4	VGFR3_HUMAN	P954S	268	αD/αE-loop	-	-	CAEKSpQRGRF	0.84	0.058	0.103	0.126	0.134	0.42	0.174	0.161	0.094	0.673	0.128	5	oncogene
P35916/V1097M	P35916	FLT4	VGFR3_HUMAN	V1097M	588	αF	-	-	TTQSDvSFGVL	0.231	0.454	0.315	0.674	0.626	0.463	0.558	0.548	0.615	0.46	0.51	5	oncogene
P35968/A1065T	P35968	KDR	VGFR2_HUMAN	A1065T	529	A-loop	-	-	VRKGDaLPLKW	0.433	0.275	0.292	0.681	0.666	0.394	0.567	0.405	0.632	0.435	0.275	5	oncogene
P35968/D985N	P35968	KDR	VGFR2_HUMAN	D985N	343	αD/αE-loop	-	-	EKSLSdEEEEA	0.801	0.064	0.136	0.137	0.127	0.443	0.165	0.175	0.111	0.674	0.142	5	oncogene
P35968/V1041M	P35968	KDR	VGFR2_HUMAN	V1041M	474	Catalytic-loop	-	-	LSEKNvKICDF	0.275	0.328	0.397	0.566	0.617	0.526	0.562	0.414	0.533	0.579	0.536	5	oncogene
P36888/A627T	P36888	FLT3	FLT3_HUMAN	A627T	51	β2	-	-	GKVMNaAYGIS	0.251	0.39	0.359	0.568	0.519	0.455	0.485	0.427	0.503	0.569	0.494	5	oncogene
P36888/M664I	P36888	FLT3	FLT3_HUMAN	M664I	152	αC	-	-	MSELKmTQLGS	0.411	0.156	0.433	0.472	0.36	0.611	0.489	0.198	0.21	0.721	0.4	5	oncogene
P36894/A357T	P36894	BMPR1A	BMR1A_HUMAN	A357T	417	Catalytic-loop	-	-	TQGKPaAHRDL	0.558	0.197	0.245	0.253	0.264	0.459	0.258	0.249	0.234	0.637	0.23	5	oncogene, TSG
P36896/R453H	P36896	ACVR1B	ACV1B_HUMAN	R453H	687	αG/αH-loop	-	-	CDQKLrNIPNW	0.182	0.466	0.352	0.661	0.607	0.451	0.56	0.468	0.612	0.51	0.415	5	TSG
P37173/R356W	P37173	TGFBR2	TGFR2_HUMAN	R356W	383	αE	-	-	GSSLArIAHLH	0.249	0.467	0.285	0.625	0.633	0.384	0.514	0.549	0.563	0.412	0.371	5	TSG
P43250/A202T	P43250	GRK6	GRK6_HUMAN	A202T	48	β2	-	-	FGEVCaQVRAT	0.323	0.3	0.377	0.483	0.417	0.53	0.494	0.349	0.413	0.582	0.353	5	NA
P46734/I50V	P46734	MAP2K3	MP2K3_HUMAN	I50V	15	N-term-β1	-	-	DSRTFiIGDRN	0.807	0.067	0.126	0.187	0.245	0.492	0.257	0.158	0.132	0.692	0.161	5	NA
P51955/D277E	P51955	NEK2	NEK2_HUMAN	D277E	859	C-term-αI	-	-	ADLVAdQRRNL	0.795	0.064	0.14	0.268	0.264	0.439	0.268	0.16	0.19	0.684	0.205	5	NA
P52333/E958K	P52333	JAK3	JAK3_HUMAN	E958K	435	Catalytic-loop	-	-	RNILVeEAHVK	0.353	0.255	0.392	0.457	0.404	0.52	0.429	0.308	0.418	0.628	0.332	5	oncogene
P53667/R332H	P53667	LIMK1	LIMK1_HUMAN	R332H	22	N-term-β1	-	-	VCRPHrFRPSD	0.32	0.33	0.349	0.628	0.561	0.503	0.576	0.451	0.433	0.548	0.39	5	NA
Q00526/R214C	Q00526	CDK3	CDK3_HUMAN	R214C	671	αG/αH-loop	-	-	IDQLFrFRMLG	0.232	0.296	0.471	0.56	0.564	0.534	0.531	0.39	0.548	0.613	0.376	5	NA
Q04912/R1231H	Q04912	MST1R	RON_HUMAN	R1231H	485	A-loop	-	-	DFGLArILDRE	0.106	0.359	0.535	0.792	0.812	0.579	0.788	0.478	0.795	0.56	0.513	5	NA
Q08881/N384H	Q08881	ITK	ITK_HUMAN	N384H	79	β2/β3-loop	-	-	LGYWLnDKVAI	0.551	0.2	0.249	0.36	0.333	0.424	0.319	0.21	0.26	0.645	0.218	5	fusion
Q13043/R117Q	Q13043	STK4	STK4_HUMAN	R117Q	354	αD/αE-loop	-	-	DIIRLrKTLTE	0.466	0.21	0.324	0.35	0.359	0.476	0.372	0.268	0.24	0.665	0.198	5	NA
Q15349/A590V	Q15349	RPS6KA2	KS6A2_HUMAN	A590V	583	αF	-	-	RQGYDaCDIWS	0.541	0.183	0.275	0.275	0.231	0.52	0.276	0.219	0.278	0.664	0.246	5	NA
Q15375/E698K	Q15375	EPHA7	EPHA7_HUMAN	E698K	183	β4	-	-	NVVHLeVVTRG	0.516	0.163	0.32	0.389	0.329	0.448	0.334	0.236	0.235	0.639	0.336	5	inconclusive
Q15375/G796E	Q15375	EPHA7	EPHA7_HUMAN	G796E	529	A-loop	-	-	YTTTGgIPVRW	0.074	0.364	0.563	0.908	0.91	0.615	0.87	0.477	0.885	0.601	0.578	5	inconclusive
Q15831/G196V	Q15831	STK11	STK11_HUMAN	G196V	481	A-loop;DFG-motif	-	-	KISDLgAEALH	0.088	0.482	0.43	0.821	0.861	0.511	0.735	0.56	0.81	0.542	0.587	5	TSG
Q15831/G242V	Q15831	STK11	STK11_HUMAN	G242V	592	αF	-	-	DIWSAgTLYNI	0.229	0.544	0.227	0.636	0.679	0.296	0.574	0.605	0.645	0.336	0.528	5	TSG
Q15831/G242W	Q15831	STK11	STK11_HUMAN	G242W	592	αF	-	-	DIWSAgTLYNI	0.23	0.555	0.215	0.632	0.677	0.261	0.579	0.621	0.659	0.283	0.534	5	TSG
Q15831/R39C	Q15831	STK11	STK11_HUMAN	R39C	17	N-term-β1	-	-	VIYQPrKRAKL	0.441	0.226	0.333	0.398	0.352	0.433	0.348	0.344	0.33	0.616	0.205	5	TSG
Q16816/A309T	Q16816	PHKG1	PHKG1_HUMAN	A309T	873	C-term-αI	-	-	KFKVIaTVLAS	0.857	0.044	0.099	0.141	0.162	0.404	0.172	0.133	0.106	0.669	0.135	5	NA
Q5TCY1/E11K	Q5TCY1	TTBK1	TTBK1_HUMAN	E11K	7	N-term-β1	-	-	AALKDeNMSGG	0.757	0.127	0.115	0.274	0.231	0.432	0.182	0.282	0.193	0.633	0.27	5	NA
Q8IU85/G208R	Q8IU85	CAMK1D	KCC1D_HUMAN	G208R	592	αF	-	-	DCWSIgIAYIL	0.256	0.502	0.242	0.616	0.636	0.298	0.546	0.604	0.637	0.362	0.543	5	NA
Q8N752/E98K	Q8N752	CSNK1A1L	KC1AL_HUMAN	E98K	250	αD	-	-	LGPSLeLFNFC	0.241	0.403	0.356	0.615	0.591	0.452	0.49	0.46	0.528	0.485	0.504	5	NA
Q8NG66/A233T	Q8NG66	NEK11	NEK11_HUMAN	A233T	631	αF/αG-loop	-	-	MNHAFaSNFLS	0.9	0.048	0.052	0.137	0.159	0.32	0.127	0.149	0.128	0.631	0.099	5	NA
Q8TF76/S621F	Q8TF76	HASPIN	HASP_HUMAN	S621F	365	αD/αE-loop	-	-	RTKLSsATAKS	0.231	0.464	0.304	0.672	0.68	0.409	0.62	0.527	0.607	0.49	0.545	5	NA
Q8WTQ7/R388Q	Q8WTQ7	GRK7	GRK7_HUMAN	R388Q	606	αF/αG-loop	-	-	EMVAGrPFKDY	0.753	0.08	0.168	0.255	0.275	0.452	0.257	0.217	0.242	0.616	0.169	5	NA
Q8WXR4/S221F	Q8WXR4	MYO3B	MYO3B_HUMAN	S221F	590	αF	-	-	RCDVWsGITAI	0.179	0.511	0.31	0.709	0.721	0.362	0.597	0.567	0.665	0.458	0.494	5	NA
Q9HC98/G297E	Q9HC98	NEK6	NEK6_HUMAN	G297E	853	αI	-	-	QRPDIgVHQVA	0.814	0.036	0.15	0.152	0.154	0.45	0.25	0.156	0.142	0.723	0.18	5	NA
Q9NYV4/R858W	Q9NYV4	CDK12	CDK12_HUMAN	R858W	424	Catalytic-loop;HrD-motif	-	-	KNFLHrIKCSN	0.091	0.659	0.251	0.841	0.812	0.296	0.658	0.712	0.861	0.248	0.527	5	TSG
Q9NZJ5/R633W	Q9NZJ5	EIF2AK3	E2AK3_HUMAN	R633W	121	αC	-	-	NRELArKVMRE	0.239	0.336	0.425	0.649	0.592	0.501	0.601	0.388	0.504	0.563	0.427	5	NA
Q9P286/H566Y	Q9P286	PAK5	PAK5_HUMAN	H566Y	423	Catalytic-loop;HrD-motif	-	-	NQGVIhDIKSD	0.14	0.602	0.258	0.663	0.67	0.365	0.566	0.598	0.687	0.349	0.482	5	NA
Q9UM73/E1242K	Q9UM73	ALK	ALK_HUMAN	E1242K	402	Catalytic-loop	-	-	CQYLEeHFIHR	0.416	0.231	0.352	0.312	0.333	0.448	0.362	0.272	0.261	0.607	0.299	5	oncogene, fusion
O14733/R153C	O14733	MAP2K7	MP2K7_HUMAN	R153C	106	β3/αC-loop	-	-	VKQMRrGNKEE	0.339	0.232	0.429	0.474	0.432	0.475	0.464	0.323	0.438	0.607	0.326	5	NA
O15146/R836C	O15146	MUSK	MUSK_HUMAN	R836C	820	αH	-	-	LYNLMrCWSKL	0.329	0.219	0.452	0.5	0.425	0.551	0.463	0.294	0.357	0.653	0.313	5	NA
O75582/V610I	O75582	RPS6KA5	KS6A5_HUMAN	V610I	593	αF	-	-	LWSLGvLYTML	0.581	0.209	0.21	0.248	0.324	0.423	0.252	0.301	0.288	0.527	0.213	5	NA
O75914/R513C	O75914	PAK3	PAK3_HUMAN	R513C	821	αH	-	-	RDFLNrLEMDV	0.763	0.096	0.141	0.274	0.271	0.423	0.219	0.242	0.195	0.633	0.146	5	NA
O96017/A237T	O96017	CHEK2	CHK2_HUMAN	A237T	51	β2	-	-	GEVKLaERKTC	0.335	0.304	0.361	0.452	0.456	0.444	0.452	0.379	0.44	0.549	0.39	5	TSG
P00533/G874S	P00533	EGFR	EGFR_HUMAN	G874S	529	A-loop	-	-	YHAEGgVPIKW	0.111	0.452	0.437	0.896	0.878	0.521	0.835	0.521	0.825	0.456	0.539	5	oncogene
P00533/R748K	P00533	EGFR	EGFR_HUMAN	R748K	102	β3/αC-loop	-	-	AIKELrATSPK	0.73	0.118	0.152	0.287	0.292	0.427	0.309	0.295	0.271	0.522	0.189	5	oncogene
P04049/R391W	P04049	RAF1	RAF1_HUMAN	R391W	147	αC	-	-	QFQAFrEVAVL	0.464	0.23	0.305	0.431	0.468	0.397	0.408	0.359	0.346	0.568	0.26	5	oncogene, fusion
P04629/R702C	P04629	NTRK1	NTRK1_HUMAN	R702C	549	A-loop	-	-	ESILYrFTTES	0.264	0.27	0.466	0.558	0.525	0.571	0.533	0.356	0.468	0.628	0.404	5	oncogene, TSG, fusion
P07948/E359K	P07948	LYN	LYN_HUMAN	E359K	393	αE	-	-	GMAYIeKNYIH	0.191	0.467	0.342	0.659	0.646	0.472	0.568	0.475	0.606	0.49	0.534	5	oncogene, fusion
P08922/E1933K	P08922	ROS1	ROS1_HUMAN	E1933K	17	N-term-β1	-	-	LPTQEeENLPA	0.236	0.419	0.345	0.644	0.567	0.409	0.505	0.478	0.528	0.557	0.485	5	oncogene, fusion
P10721/D737N	P10721	KIT	KIT_HUMAN	D737N	331	αD/αE-loop	-	-	VPTKAdRRSVR	0.86	0.053	0.087	0.144	0.14	0.432	0.169	0.173	0.108	0.654	0.195	5	oncogene
P14616/E1091K	P14616	INSRR	INSRR_HUMAN	E1091K	370	αE	-	-	QPALGeIQMAG	0.912	0.036	0.053	0.124	0.131	0.334	0.147	0.153	0.117	0.654	0.155	5	NA
P14616/R1157C	P14616	INSRR	INSRR_HUMAN	R1157C	539	A-loop	-	-	GLLPVrMAPES	0.183	0.416	0.401	0.714	0.701	0.495	0.576	0.481	0.712	0.546	0.453	5	NA
P15056/D594A	P15056	BRAF	BRAF_HUMAN	D594A	479	A-loop;DFG-motif	-	-	TVKIGdGLATV	0.017	0.969	0.015	0.962	0.967	0.068	0.625	0.952	0.935	0.062	0.614	5	oncogene, fusion
P15056/G606E	P15056	BRAF	BRAF_HUMAN	G606E	507	A-loop	-	-	KSRWSgHQFEQ	0.125	0.309	0.566	0.771	0.801	0.712	0.803	0.348	0.685	0.728	0.626	5	oncogene, fusion
P15056/V471I	P15056	BRAF	BRAF_HUMAN	V471I	46	β2	-	-	GSFGTvKGKWH	0.28	0.35	0.37	0.529	0.588	0.529	0.552	0.334	0.413	0.59	0.453	5	oncogene, fusion
P16234/G829E	P16234	PDGFRA	PGFRA_HUMAN	G829E	472	Catalytic-loop	-	-	VLLAQgIVKIC	0.35	0.268	0.382	0.426	0.416	0.52	0.437	0.284	0.339	0.671	0.356	5	oncogene, fusion
P16591/R707H	P16591	FER	FER_HUMAN	R707H	485	A-loop	-	-	DFGMSrEDGGV	0.122	0.381	0.497	0.76	0.755	0.578	0.692	0.433	0.776	0.552	0.448	5	NA
P20794/E263K	P20794	MAK	MAK_HUMAN	E263K	821	αH	-	-	IQLMTeLNWDP	0.665	0.179	0.157	0.25	0.259	0.475	0.239	0.233	0.205	0.661	0.222	5	NA
P22455/R565Q	P22455	FGFR4	FGFR4_HUMAN	R565Q	256	αD/αE-loop	-	-	EFLRArPPGPD	0.448	0.177	0.376	0.374	0.305	0.569	0.432	0.223	0.242	0.731	0.255	5	oncogene
P35916/R1070H	P35916	FLT4	VGFR3_HUMAN	R1070H	525	A-loop	-	-	DPDYVrGSARL	0.169	0.178	0.653	0.792	0.742	0.724	0.829	0.262	0.583	0.788	0.451	5	oncogene
P36507/D71N	P36507	MAP2K2	MP2K2_HUMAN	D71N	30	N-term-β1	-	-	ELKDDdERISE	0.352	0.346	0.302	0.542	0.473	0.45	0.428	0.372	0.418	0.61	0.362	5	oncogene
P36507/G65S	P36507	MAP2K2	MP2K2_HUMAN	G65S	24	N-term-β1	-	-	QKAKVgLKDDD	0.343	0.346	0.311	0.558	0.545	0.474	0.489	0.379	0.48	0.601	0.385	5	oncogene
P36897/K232N	P36897	TGFBR1	TGFR1_HUMAN	K232N	96	β3;Catalytic-Lys	-	-	EEVAVkFSSRE	0.003	0.992	0.006	0.996	0.992	0.015	0.7	0.991	0.989	0.019	0.544	5	NA
P37023/E236K	P37023	ACVRL1	ACVL1_HUMAN	E236K	143	αC	-	-	FSSRDeSWFRE	0.29	0.291	0.419	0.531	0.52	0.489	0.474	0.367	0.434	0.576	0.464	5	NA
P37173/L529F	P37173	TGFBR2	TGFR2_HUMAN	L529F	833	αI	-	-	DPEARlAQCVA	0.31	0.308	0.381	0.497	0.453	0.443	0.411	0.378	0.4	0.565	0.419	5	TSG
P46734/A337V	P46734	MAP2K3	MP2K3_HUMAN	A337V	864	C-term-αI	-	-	KTDIAaVKEIL	0.667	0.13	0.203	0.217	0.257	0.432	0.296	0.235	0.185	0.64	0.217	5	NA
P48729/G208E	P48729	CSNK1A1	KC1A_HUMAN	G208E	592	αF	-	-	DMESLgVLMYF	0.155	0.606	0.24	0.673	0.705	0.291	0.58	0.625	0.691	0.37	0.556	5	NA
P51841/R628Q	P51841	GUCY2F	GUC2F_HUMAN	R628Q	239	β5/αD-loop	-	neutral	TEFCSrSLEDI	0.296	0.356	0.348	0.534	0.531	0.487	0.535	0.371	0.491	0.606	0.437	5	NA
P53355/A136T	P53355	DAPK1	DAPK1_HUMAN	A136T	419	Catalytic-loop	-	-	HSLQIaFDLKP	0.486	0.219	0.296	0.304	0.218	0.421	0.336	0.309	0.236	0.602	0.254	5	NA
P53671/R316C	P53671	LIMK2	LIMK2_HUMAN	R316C	14	N-term-β1	-	-	RSESLrSSSYS	0.231	0.346	0.424	0.615	0.549	0.551	0.564	0.421	0.612	0.577	0.389	5	NA
P54762/A872V	P54762	EPHB1	EPHB1_HUMAN	A872V	843	αI	-	-	SRPRFaIVNTL	0.797	0.088	0.115	0.157	0.177	0.401	0.185	0.2	0.128	0.639	0.121	5	NA
P68400/R80H	P68400	CSNK2A1	CSK21_HUMAN	R80H	148	αC	-	-	KKKIKrIKILE	0.151	0.536	0.313	0.713	0.672	0.405	0.584	0.532	0.646	0.462	0.519	5	NA
P80192/R160C	P80192	MAP3K9	M3K9_HUMAN	R160C	48	β2	-	-	FGKVYrFWIGD	0.143	0.439	0.418	0.731	0.721	0.445	0.656	0.494	0.742	0.479	0.441	5	NA
Q00532/Q275E	Q00532	CDKL1	CDKL1_HUMAN	Q275E	829	αH/αI-loop	-	neutral	HMDPTqLTCEQ	0.872	0.026	0.102	0.102	0.12	0.378	0.173	0.124	0.104	0.697	0.104	5	NA
Q02750/I103N	Q02750	MAP2K1	MP2K1_HUMAN	I103N	111	β3/αC-loop	-	-	LIHLEiPAIRN	0.353	0.32	0.327	0.543	0.465	0.46	0.462	0.372	0.446	0.549	0.53	5	oncogene
Q04759/E571K	Q04759	PRKCQ	KPCT_HUMAN	E571K	597	αF	-	-	GVLLYeLIGQS	0.2	0.451	0.349	0.576	0.564	0.43	0.488	0.484	0.593	0.496	0.445	5	NA
Q12866/R722Q	Q12866	MERTK	MERTK_HUMAN	R722Q	424	Catalytic-loop;HrD-motif	-	-	RNFLHrLAARN	0.117	0.547	0.336	0.792	0.792	0.407	0.6	0.587	0.8	0.399	0.499	5	NA
Q13233/S1330W	Q13233	MAP3K1	M3K1_HUMAN	S1330W	241	β5/αD-loop	-	-	WMAGGsAHLLS	0.119	0.607	0.274	0.785	0.713	0.394	0.67	0.578	0.675	0.366	0.772	5	oncogene, TSG
Q13418/R349H	Q13418	ILK	ILK_HUMAN	R349H	529	A-loop	-	-	FQCPGrYAPAW	0.165	0.486	0.349	0.763	0.785	0.439	0.743	0.528	0.753	0.467	0.372	5	NA
Q13464/E270K	Q13464	ROCK1	ROCK1_HUMAN	E270K	597	αF	-	-	GVFLYeLVGDT	0.236	0.364	0.399	0.503	0.493	0.447	0.479	0.449	0.515	0.535	0.409	5	NA
Q15303/G741R	Q15303	ERBB4	ERBB4_HUMAN	G741R	74	β2/β3-loop	-	-	IWVPEgTVKIP	0.33	0.302	0.368	0.521	0.476	0.532	0.495	0.406	0.482	0.624	0.485	5	oncogene, TSG
Q15303/G907E	Q15303	ERBB4	ERBB4_HUMAN	G907E	592	αF	-	-	DVWSYgTIWEL	0.201	0.575	0.225	0.672	0.69	0.319	0.594	0.59	0.672	0.376	0.539	5	oncogene, TSG
Q15303/K1002T	Q15303	ERBB4	ERBB4_HUMAN	K1002T	879	C-term-αI	-	-	SPNDSkFQNLL	0.549	0.166	0.285	0.428	0.423	0.439	0.435	0.327	0.354	0.544	0.305	5	oncogene, TSG
Q15303/T926M	Q15303	ERBB4	ERBB4_HUMAN	T926M	638	αG	-	-	YDGIPtEIPDL	0.548	0.23	0.222	0.39	0.344	0.448	0.343	0.362	0.354	0.614	0.2	5	oncogene, TSG
Q15375/E828K	Q15375	EPHA7	EPHA7_HUMAN	E828K	597	αF	-	-	GIVMWeMSYGE	0.302	0.374	0.324	0.413	0.408	0.437	0.439	0.36	0.475	0.567	0.318	5	inconclusive
Q15375/G656E	Q15375	EPHA7	EPHA7_HUMAN	G656E	75	β2/β3-loop	-	-	RLKLPgRDVAV	0.232	0.342	0.426	0.611	0.562	0.599	0.574	0.382	0.538	0.595	0.529	5	inconclusive
Q15831/D237Y	Q15831	STK11	STK11_HUMAN	D237Y	587	αF	-	-	SGFKVdWSAGV	0.131	0.684	0.185	0.735	0.731	0.228	0.545	0.691	0.744	0.285	0.542	5	TSG
Q16288/D584N	Q16288	NTRK3	NTRK3_HUMAN	D584N	145	αC	-	-	LAARKdQREAE	0.299	0.303	0.398	0.559	0.485	0.507	0.462	0.328	0.416	0.647	0.361	5	oncogene, fusion
Q16288/V539M	Q16288	NTRK3	NTRK3_HUMAN	V539M	32	β1	-	-	KRRDIvKRELG	0.751	0.092	0.157	0.128	0.151	0.493	0.198	0.208	0.162	0.664	0.147	5	oncogene, fusion
Q16659/L290V	Q16659	MAPK6	MK06_HUMAN	L290V	814	αH	-	-	ISREAlFLEQI	0.844	0.069	0.087	0.15	0.156	0.422	0.161	0.171	0.118	0.703	0.15	5	NA
Q5S007/T2141M	Q5S007	LRRK2	LRRK2_HUMAN	T2141M	864	C-term-αI	-	-	ELVCLtRILLP	0.836	0.065	0.099	0.142	0.179	0.329	0.24	0.173	0.154	0.655	0.191	5	NA
Q6ZN16/P684L	Q6ZN16	MAP3K15	M3K15_HUMAN	P684L	102	β3/αC-loop	-	-	AIKEIpRDSRY	0.271	0.311	0.419	0.527	0.578	0.447	0.535	0.457	0.531	0.535	0.467	5	NA
Q86YV6/A161V	Q86YV6	MYLK4	MYLK4_HUMAN	A161V	172	αC/β4-loop	-	-	NQLDHaLIQLY	0.905	0.034	0.061	0.104	0.112	0.349	0.15	0.117	0.096	0.682	0.202	5	NA
Q86YV6/D175N	Q86YV6	MYLK4	MYLK4_HUMAN	D175N	219	β4/β5-loop	-	-	FESKNdVLVME	0.808	0.074	0.117	0.16	0.148	0.471	0.174	0.132	0.125	0.666	0.174	5	NA
Q8IY84/R272W	Q8IY84	NIM1K	NIM1_HUMAN	R272W	631	αF/αG-loop	-	-	GTMPFrETVAK	0.338	0.29	0.372	0.461	0.445	0.526	0.463	0.354	0.364	0.652	0.328	5	NA
Q96GD4/M298T	Q96GD4	AURKB	AURKB_HUMAN	M298T	806	αH	-	neutral	PASVPmAQDLI	0.88	0.036	0.084	0.096	0.119	0.376	0.18	0.147	0.098	0.682	0.145	5	NA
Q96QS6/R338Q	Q96QS6	PSKH2	KPSH2_HUMAN	R338Q	870	C-term-αI	-	-	QRAISrLMQRA	0.866	0.072	0.062	0.178	0.204	0.387	0.22	0.154	0.128	0.692	0.073	5	NA
Q9C098/R343W	Q9C098	DCLK3	DCLK3_HUMAN	R343W	18	N-term-β1	-	-	SGRKPrMGIIA	0.384	0.274	0.342	0.504	0.435	0.534	0.44	0.309	0.43	0.637	0.355	5	NA
Q9NRM7/D703N	Q9NRM7	LATS2	LATS2_HUMAN	D703N	111	β3/αC-loop	-	-	TLRKKdLNRNQ	0.29	0.381	0.329	0.569	0.56	0.442	0.481	0.44	0.519	0.519	0.5	5	TSG
Q9NRM7/R958H	Q9NRM7	LATS2	LATS2_HUMAN	R958H	829	αH/αI-loop	-	-	CSADHrGRNGA	0.179	0.511	0.31	0.629	0.593	0.432	0.509	0.494	0.617	0.442	0.401	5	TSG
Q9NYY3/F363L	Q9NYY3	PLK2	PLK2_HUMAN	F363L	881	C-term-αI	-	-	SPAKNfKKAAA	0.706	0.096	0.199	0.386	0.382	0.389	0.352	0.278	0.293	0.622	0.27	5	NA
Q9UBS0/R120W	Q9UBS0	RPS6KB2	KS6B2_HUMAN	R120W	150	αC	-	-	HTRAErILESV	0.136	0.521	0.343	0.724	0.694	0.413	0.602	0.527	0.682	0.465	0.467	5	NA
Q9Y243/F207L	Q9Y243	AKT3	AKT3_HUMAN	F207L	173	αC/β4-loop	-	-	NTRHPfTSLKY	0.2	0.404	0.397	0.643	0.665	0.465	0.551	0.524	0.642	0.531	0.524	5	oncogene
Q9Y616/R412Q	Q9Y616	IRAK3	IRAK3_HUMAN	R412Q	701	αG/αH-loop	-	-	VPPCPrFSAKL	0.897	0.029	0.074	0.146	0.135	0.38	0.187	0.122	0.087	0.7	0.076	5	NA
Q9Y6E0/A134T	Q9Y6E0	STK24	STK24_HUMAN	A134T	372	αE	-	-	DETQIaILREI	0.354	0.297	0.349	0.452	0.394	0.457	0.382	0.374	0.347	0.595	0.382	5	NA
O00311/R188C	O00311	CDC7	CDC7_HUMAN	R188C	439	Catalytic-loop	-	-	FLYNRrKKYAL	0.311	0.282	0.407	0.539	0.495	0.496	0.512	0.395	0.458	0.564	0.337	5	NA
O14578/E98K	O14578	CIT	CTRO_HUMAN	E98K	32	β1	-	-	SAKDFeRSLVG	0.59	0.159	0.251	0.274	0.232	0.49	0.271	0.241	0.243	0.628	0.286	5	NA
O43187/L392V	O43187	IRAK2	IRAK2_HUMAN	L392V	579	A-loop	-	neutral	IRVGQlKRVDI	0.716	0.113	0.17	0.251	0.215	0.449	0.263	0.213	0.198	0.657	0.213	5	NA
O96017/V198L	O96017	CHEK2	CHK2_HUMAN	V198L	7	N-term-β1	-	-	LSRNKvVFFDL	0.368	0.29	0.342	0.461	0.397	0.519	0.421	0.347	0.345	0.62	0.383	5	TSG
P00519/R516H	P00519	ABL1	ABL1_HUMAN	R516H	874	C-term-αI	-	-	GKQGVrAVSTL	0.852	0.053	0.095	0.166	0.15	0.428	0.186	0.148	0.126	0.682	0.146	5	oncogene, fusion
P00533/D770N	P00533	EGFR	EGFR_HUMAN	D770N	162	αC/β4-loop	-	-	VMASVdPHVCR	0.409	0.312	0.28	0.497	0.467	0.361	0.404	0.538	0.453	0.418	0.347	5	oncogene
P04626/L755M	P04626	ERBB2	ERBB2_HUMAN	L755M	98	β3	-	-	VAIKVlENTSP	0.429	0.226	0.346	0.514	0.454	0.501	0.425	0.367	0.381	0.566	0.434	5	oncogene, fusion
P04626/L841V	P04626	ERBB2	ERBB2_HUMAN	L841V	418	Catalytic-loop	-	-	LEDVRlHRDLA	0.547	0.209	0.244	0.346	0.357	0.435	0.307	0.336	0.341	0.562	0.327	5	oncogene, fusion
P07332/R649C	P07332	FES	FES_HUMAN	R649C	254	αD	-	-	FLTFLrEGARL	0.162	0.314	0.523	0.642	0.648	0.579	0.618	0.404	0.628	0.587	0.459	5	oncogene, TSG
P09619/R604C	P09619	PDGFRB	PGFRB_HUMAN	R604C	35	β1	-	-	QLVLGrLGSGA	0.221	0.344	0.435	0.624	0.638	0.485	0.583	0.424	0.589	0.53	0.418	5	oncogene, fusion
P0C264/P35R	P0C264	SBK3	SBK3_HUMAN	P35R	23	N-term-β1	-	-	TSRVTpRSLRD	0.737	0.12	0.143	0.294	0.271	0.376	0.274	0.246	0.286	0.655	0.162	5	NA
P10721/E761K	P10721	KIT	KIT_HUMAN	E761K	355	αD/αE-loop	-	-	IMEDDeALDLE	0.782	0.058	0.161	0.151	0.15	0.483	0.23	0.177	0.143	0.667	0.175	5	oncogene
P10721/P874L	P10721	KIT	KIT_HUMAN	P874L	636	αF/αG-loop	-	-	PYPGMpDSKFY	0.398	0.296	0.306	0.505	0.493	0.503	0.477	0.403	0.424	0.554	0.49	5	oncogene
P10721/V950M	P10721	KIT	KIT_HUMAN	V950M	877	C-term-αI	-	-	NRQKPvDHSVR	0.837	0.068	0.095	0.137	0.121	0.403	0.18	0.135	0.127	0.697	0.208	5	oncogene
P11362/P772S	P11362	FGFR1	FGFR1_HUMAN	P772S	868	C-term-αI	-	-	LDLSMpDQYSP	0.323	0.236	0.441	0.456	0.453	0.509	0.477	0.361	0.358	0.615	0.392	5	oncogene, fusion
P14616/R1119H	P14616	INSRR	INSRR_HUMAN	R1119H	430	Catalytic-loop	-	-	RDLAArCMVSQ	0.167	0.556	0.277	0.753	0.711	0.32	0.591	0.656	0.698	0.302	0.498	5	NA
P15056/H725Y	P15056	BRAF	BRAF_HUMAN	H725Y	863	C-term-αI	-	-	SLPKIhSASEP	0.326	0.242	0.432	0.542	0.447	0.527	0.493	0.32	0.424	0.574	0.367	5	oncogene, fusion
P16066/R798C	P16066	NPR1	ANPRA_HUMAN	R798C	847	αI	-	-	PFQQIrTLRKF	0.3	0.28	0.421	0.58	0.545	0.538	0.557	0.392	0.455	0.59	0.429	5	NA
P20594/R620C	P20594	NPR2	ANPRB_HUMAN	R620C	371	αE	-	-	LDWMFrSLIND	0.299	0.261	0.44	0.594	0.525	0.553	0.534	0.387	0.469	0.618	0.415	5	NA
P21802/E777K	P21802	FGFR2	FGFR2_HUMAN	E777K	870	C-term-αI	-	-	LSQPLeYSPSY	0.439	0.22	0.342	0.398	0.376	0.493	0.432	0.315	0.304	0.659	0.313	5	oncogene, fusion
P25098/F452L	P25098	GRK2	ARBK1_HUMAN	F452L	851	αI	-	-	VKESPfRSLDW	0.204	0.388	0.408	0.645	0.671	0.524	0.557	0.507	0.587	0.579	0.536	5	NA
P28482/S246F	P28482	MAPK1	MK01_HUMAN	S246F	687	αG/αH-loop	p	-	LGILGsSQEDL	0.164	0.336	0.5	0.69	0.674	0.492	0.642	0.455	0.624	0.585	0.444	5	oncogene
P29320/E686K	P29320	EPHA3	EPHA3_HUMAN	E686K	183	β4	-	-	NIIRLeVVTKS	0.354	0.225	0.421	0.554	0.487	0.503	0.507	0.345	0.345	0.625	0.451	5	inconclusive
P30530/R763H	P30530	AXL	UFO_HUMAN	R763H	660	αG	-	-	IYDYLrGNRLK	0.489	0.255	0.256	0.341	0.339	0.469	0.391	0.291	0.24	0.594	0.208	5	NA
P31152/V100M	P31152	MAPK4	MK04_HUMAN	V100M	219	β4/β5-loop	-	-	LFKFSvYIVQE	0.812	0.048	0.14	0.183	0.162	0.479	0.195	0.146	0.135	0.694	0.163	5	NA
P35968/D1052N	P35968	KDR	VGFR2_HUMAN	D1052N	491	A-loop	-	-	FGLARdYKDPD	0.129	0.06	0.811	0.798	0.693	0.93	0.831	0.15	0.353	0.946	0.853	5	oncogene
P35968/R946H	P35968	KDR	VGFR2_HUMAN	R946H	271	αD/αE-loop	-	-	KGARFrGKDYV	0.871	0.037	0.092	0.087	0.088	0.379	0.137	0.117	0.072	0.682	0.078	5	oncogene
P36888/G583S	P36888	FLT3	FLT3_HUMAN	G583S	4	N-term-β1	-	-	MVQVTgSDNEY	0.263	0.315	0.422	0.574	0.622	0.532	0.546	0.419	0.551	0.585	0.552	5	oncogene
P36888/G822R	P36888	FLT3	FLT3_HUMAN	G822R	472	Catalytic-loop	-	-	VLVTHgVVKIC	0.295	0.287	0.418	0.584	0.563	0.504	0.497	0.419	0.439	0.596	0.475	5	oncogene
P36896/R201H	P36896	ACVR1B	ACV1B_HUMAN	R201H	22	N-term-β1	-	-	PLFVQrVARTI	0.323	0.402	0.275	0.579	0.56	0.439	0.503	0.439	0.489	0.59	0.29	5	TSG
P36897/A202V	P36897	TGFBR1	TGFR1_HUMAN	A202V	25	N-term-β1	-	-	VQRTIaTIVLQ	0.213	0.408	0.379	0.681	0.65	0.432	0.517	0.5	0.574	0.43	0.455	5	NA
P36897/G214V	P36897	TGFBR1	TGFR1_HUMAN	G214V	40	β1;Gly-rich-loop	-	-	ESIGKgFGEVW	0.1	0.766	0.134	0.828	0.827	0.208	0.595	0.783	0.858	0.214	0.63	5	NA
P37173/E526Q	P37173	TGFBR2	TGFR2_HUMAN	E526Q	828	αH/αI-loop	-	-	WDHDPeRLTAQ	0.576	0.185	0.239	0.288	0.295	0.399	0.27	0.258	0.225	0.606	0.203	5	TSG
P43250/V404D	P43250	GRK6	GRK6_HUMAN	V404D	691	αG/αH-loop	-	-	RLVKEvEEYSE	0.483	0.161	0.356	0.338	0.235	0.573	0.397	0.238	0.22	0.728	0.313	5	NA
P43403/R465H	P43403	ZAP70	ZAP70_HUMAN	R465H	430	Catalytic-loop	-	-	RDLAArVLLVN	0.288	0.436	0.277	0.649	0.602	0.369	0.541	0.566	0.55	0.405	0.415	5	NA
P45983/A42T	P45983	MAPK8	MK08_HUMAN	A42T	48	β2	-	-	QGIVCaYDAIL	0.401	0.208	0.391	0.41	0.367	0.542	0.441	0.301	0.302	0.635	0.337	5	NA
P45983/S97F	P45983	MAPK8	MK08_HUMAN	S97F	192	β4/β5-loop	-	-	FTPQKsEEFQD	0.326	0.272	0.402	0.442	0.412	0.481	0.453	0.336	0.395	0.619	0.345	5	NA
P45985/R134Q	P45985	MAP2K4	MP2K4_HUMAN	R134Q	102	β3/αC-loop	-	-	AVKRIrTVDEK	0.673	0.145	0.182	0.216	0.308	0.42	0.258	0.314	0.259	0.56	0.174	5	oncogene, TSG
P49336/S62L	P49336	CDK8	CDK8_HUMAN	S62L	145	αC	-	decrease	TGISMsCREIA	0.308	0.315	0.377	0.575	0.541	0.526	0.538	0.419	0.526	0.607	0.405	5	NA
P49841/R167Q	P49841	GSK3B	GSK3B_HUMAN	R167Q	383	αE	-	-	MYQLFrLAYIH	0.277	0.392	0.331	0.598	0.632	0.483	0.554	0.466	0.487	0.543	0.32	5	NA
P49841/R308Q	P49841	GSK3B	GSK3B_HUMAN	R308Q	800	αG/αH-loop	-	-	KVFRPrPPEAI	0.375	0.263	0.362	0.494	0.441	0.492	0.424	0.329	0.408	0.633	0.298	5	NA
P51813/R670W	P51813	BMX	BMX_HUMAN	R670W	855	αI	-	-	SIEPLrKDKH	0.795	0.055	0.15	0.202	0.211	0.484	0.225	0.151	0.124	0.716	0.155	5	NA
P52333/R948C	P52333	JAK3	JAK3_HUMAN	R948C	424	Catalytic-loop;HrD-motif	-	-	RRCVHrLAARN	0.118	0.6	0.282	0.794	0.773	0.353	0.597	0.651	0.834	0.33	0.53	5	oncogene
P54764/R639C	P54764	EPHA4	EPHA4_HUMAN	R639C	53	β2	-	-	EVCSGrKVPGK	0.332	0.211	0.457	0.542	0.496	0.561	0.554	0.366	0.415	0.669	0.363	5	NA
P68400/Y307C	P68400	CSNK2A1	CSK21_HUMAN	Y307C	825	αH/αI-loop	-	-	DKLLRyHQSRL	0.191	0.444	0.365	0.668	0.642	0.427	0.578	0.511	0.634	0.513	0.482	5	NA
Q00532/R51W	Q00532	CDKL1	CDKL1_HUMAN	R51W	148	αC	-	-	KKIALrIRMLK	0.115	0.578	0.308	0.753	0.733	0.366	0.592	0.6	0.745	0.382	0.532	5	NA
Q00534/R214C	Q00534	CDK6	CDK6_HUMAN	R214C	601	αF	-	-	FAEMFrKPLFR	0.327	0.208	0.465	0.477	0.423	0.569	0.474	0.273	0.347	0.68	0.336	5	oncogene, fusion
Q00534/R220C	Q00534	CDK6	CDK6_HUMAN	R220C	631	αF/αG-loop	-	-	RKPLFrSSDVD	0.795	0.1	0.106	0.186	0.223	0.423	0.238	0.219	0.169	0.654	0.099	5	oncogene, fusion
Q01974/E563K	Q01974	ROR2	ROR2_HUMAN	E563K	251	αD	-	-	HGDLHeLVMRS	0.174	0.448	0.378	0.678	0.645	0.444	0.51	0.494	0.633	0.509	0.548	5	NA
Q02750/R47Q	Q02750	MAP2K1	MP2K1_HUMAN	R47Q	10	N-term-β1	-	-	LDEQQrRLEAF	0.686	0.147	0.167	0.27	0.293	0.488	0.258	0.248	0.207	0.613	0.173	5	oncogene
Q02763/R1003H	Q02763	TEK	TIE2_HUMAN	R1003H	539	A-loop	-	-	GRLPVrMAIES	0.324	0.292	0.384	0.575	0.531	0.512	0.447	0.405	0.508	0.584	0.432	5	NA
Q04771/S290L	Q04771	ACVR1	ACVR1_HUMAN	S290L	241	β5/αD-loop	-	-	YHEMGsYDYLQ	0.176	0.548	0.275	0.704	0.693	0.423	0.643	0.571	0.64	0.427	0.808	5	oncogene
Q06418/G675R	Q06418	TYRO3	TYRO3_HUMAN	G675R	481	A-loop;DFG-motif	-	-	CVADFgSRKIY	0.097	0.461	0.441	0.838	0.861	0.492	0.749	0.558	0.816	0.528	0.629	5	NA
Q13164/R259C	Q13164	MAPK7	MK07_HUMAN	R259C	606	αF/αG-loop	-	-	EMLARrLFPGK	0.334	0.281	0.385	0.481	0.511	0.512	0.513	0.384	0.51	0.579	0.371	5	NA
Q13976/S455L	Q13976	PRKG1	KGP1_HUMAN	S455L	358	αD/αE-loop	-	-	LRDRGsEDSTT	0.482	0.242	0.276	0.356	0.29	0.494	0.331	0.315	0.355	0.602	0.235	5	NA
Q14289/R429C	Q14289	PTK2B	FAK2_HUMAN	R429C	35	β1	-	-	DVVLNrLGEGF	0.303	0.269	0.428	0.585	0.522	0.483	0.525	0.359	0.457	0.59	0.402	5	NA
Q15303/G870R	Q15303	ERBB4	ERBB4_HUMAN	G870R	499	A-loop	-	-	ARLLEgEKEYN	0.59	0.143	0.267	0.392	0.329	0.472	0.337	0.286	0.269	0.583	0.289	5	oncogene, TSG
Q15375/R877H	Q15375	EPHA7	EPHA7_HUMAN	R877H	827	αH/αI-loop	-	-	CWQKErERPKF	0.352	0.297	0.352	0.471	0.405	0.557	0.434	0.304	0.379	0.649	0.288	5	inconclusive
Q15831/E199K	Q15831	STK11	STK11_HUMAN	E199K	485	A-loop	-	loss	DLGVAeLHPFA	0.296	0.354	0.35	0.584	0.562	0.525	0.463	0.434	0.625	0.568	0.348	5	TSG
Q15835/A294T	Q15835	GRK1	GRK1_HUMAN	A294T	371	αE	-	-	FPEPRaFYTAQ	0.836	0.069	0.094	0.154	0.133	0.377	0.147	0.139	0.105	0.658	0.127	5	NA
Q16620/V608M	Q16620	NTRK2	NTRK2_HUMAN	V608M	187	β4/β5-loop	-	-	FYGVCvGDPLI	0.801	0.043	0.156	0.12	0.128	0.489	0.226	0.128	0.083	0.759	0.122	5	oncogene, fusion
Q6ZWH5/P611L	Q6ZWH5	NEK10	NEK10_HUMAN	P611L	241	β5/αD-loop	-	-	LIEGApGEHFS	0.264	0.388	0.347	0.641	0.574	0.495	0.569	0.471	0.527	0.559	0.816	5	NA
Q86UX6/A302T	Q86UX6	STK32C	ST32C_HUMAN	A302T	654	αG	-	-	IHSSNaESLVQ	0.832	0.051	0.117	0.153	0.187	0.344	0.171	0.14	0.104	0.648	0.123	5	NA
Q8IZL9/F19L	Q8IZL9	CDK20	CDK20_HUMAN	F19L	47	β2	-	-	AHGIVfAKHVE	0.471	0.231	0.298	0.404	0.342	0.496	0.328	0.298	0.382	0.616	0.406	5	NA
Q8NFD2/A239T	Q8NFD2	ANKK1	ANKK1_HUMAN	A239T	660	αG	-	neutral	IIIRVaGMRPS	0.842	0.069	0.09	0.187	0.186	0.385	0.198	0.132	0.122	0.622	0.129	5	NA
Q96GD4/R284H	Q96GD4	AURKB	AURKB_HUMAN	R284H	651	αG	-	-	NETYRrVKVDL	0.46	0.208	0.332	0.335	0.31	0.51	0.381	0.237	0.282	0.668	0.2	5	NA
Q96NX5/E229K	Q96NX5	CAMK1G	KCC1G_HUMAN	E229K	650	αG	-	-	ESKLFeIKEGY	0.583	0.194	0.223	0.249	0.189	0.47	0.281	0.224	0.214	0.638	0.195	5	NA
Q99986/R203W	Q99986	VRK1	VRK1_HUMAN	R203W	489	A-loop	-	-	YGLAYrCPEGV	0.153	0.296	0.551	0.705	0.712	0.505	0.697	0.388	0.605	0.576	0.574	5	NA
Q9BXA7/V133I	Q9BXA7	TSSK1B	TSSK1_HUMAN	V133I	419	Catalytic-loop	-	-	HDLDVvRDLKC	0.814	0.065	0.122	0.183	0.138	0.42	0.21	0.186	0.128	0.615	0.218	5	NA
Q9BYT3/E114K	Q9BYT3	STK33	STK33_HUMAN	E114K	29	N-term-β1	-	-	GAAIEeYTFGR	0.665	0.133	0.202	0.376	0.235	0.415	0.237	0.219	0.295	0.595	0.229	5	NA
Q9BYT3/S388L	Q9BYT3	STK33	STK33_HUMAN	S388L	859	C-term-αI	-	-	GNKLSsRPTNV	0.676	0.14	0.184	0.343	0.34	0.527	0.36	0.304	0.311	0.617	0.266	5	NA
Q9C098/R554C	Q9C098	DCLK3	DCLK3_HUMAN	R554C	631	αF/αG-loop	-	-	GFPPFrPERDQ	0.186	0.425	0.389	0.611	0.594	0.517	0.574	0.457	0.627	0.56	0.417	5	NA
Q9C0K7/N92D	Q9C0K7	STRADB	STRAB_HUMAN	N92D	102	β3/αC-loop	-	-	TIKITnENCNE	0.76	0.092	0.148	0.234	0.252	0.456	0.276	0.219	0.221	0.625	0.208	5	NA
Q9NQU5/R675Q	Q9NQU5	PAK6	PAK6_HUMAN	R675Q	869	C-term-αI	-	-	LIQLYrQTSTC	0.784	0.073	0.142	0.12	0.139	0.497	0.209	0.167	0.098	0.71	0.12	5	NA
Q9P286/M523I	Q9P286	PAK5	PAK5_HUMAN	M523I	233	β5	-	-	ELWVVmFLEGG	0.218	0.405	0.377	0.678	0.604	0.474	0.607	0.497	0.583	0.518	0.789	5	NA
Q9P286/M610I	Q9P286	PAK5	PAK5_HUMAN	M610I	541	A-loop	-	-	GTPYWmPEVIS	0.19	0.428	0.382	0.604	0.642	0.524	0.597	0.48	0.562	0.547	0.556	5	NA
Q9P286/V710I	Q9P286	PAK5	PAK5_HUMAN	V710I	862	C-term-αI	-	-	PPSCIvLMRQY	0.724	0.118	0.159	0.29	0.275	0.474	0.292	0.255	0.221	0.632	0.205	5	NA
Q9UM73/R1214H	Q9UM73	ALK	ALK_HUMAN	R1214H	351	αD/αE-loop	-	-	RETRPrSQPSS	0.395	0.191	0.414	0.362	0.301	0.523	0.383	0.274	0.234	0.646	0.285	5	oncogene, fusion
Q9Y6M4/R288C	Q9Y6M4	CSNK1G3	KC1G3_HUMAN	R288C	881	C-term-αI	-	-	MATYLrVRRLD	0.254	0.339	0.407	0.692	0.654	0.466	0.694	0.505	0.619	0.527	0.507	5	NA
O14733/R302W	O14733	MAP2K7	MP2K7_HUMAN	R302W	584	αF	-	-	PDYDIrDVWSL	0.21	0.444	0.346	0.64	0.674	0.387	0.577	0.497	0.581	0.42	0.428	4	NA
O15075/G399E	O15075	DCLK1	DCLK1_HUMAN	G399E	40	β1;Gly-rich-loop	-	-	RTIGDgFAVVK	0.086	0.731	0.183	0.867	0.856	0.294	0.69	0.764	0.876	0.334	0.637	4	NA
O60674/G921S	O60674	JAK2	JAK2_HUMAN	G921S	216	β4/β5-loop	-	-	VCYSAgRNLKL	0.296	0.297	0.407	0.547	0.526	0.511	0.501	0.379	0.513	0.584	0.467	4	oncogene, fusion
O60674/L1088S	O60674	JAK2	JAK2_HUMAN	L1088S	676	αG/αH-loop	-	-	KNNGRlRPDGC	0.2	0.534	0.266	0.693	0.647	0.33	0.545	0.634	0.666	0.37	0.606	4	oncogene, fusion
O60674/R564Q	O60674	JAK2	JAK2_HUMAN	R564Q	55	β2/β3-loop	-	-	IFKGVrEVGDY	0.382	0.26	0.357	0.477	0.452	0.53	0.476	0.329	0.358	0.616	0.29	4	oncogene, fusion
O95747/N13S	O95747	OXSR1	OXSR1_HUMAN	N13S	27	N-term-β1	-	-	LPWSInDDYEL	0.71	0.124	0.166	0.311	0.227	0.426	0.278	0.234	0.269	0.692	0.226	4	NA
P00533/E967K	P00533	EGFR	EGFR_HUMAN	E967K	852	αI	-	-	RELIIeSKMAR	0.519	0.204	0.277	0.319	0.27	0.483	0.303	0.284	0.27	0.643	0.233	4	oncogene
P00533/H870R	P00533	EGFR	EGFR_HUMAN	H870R	525	A-loop	-	-	EEKEYhEGGKV	0.251	0.232	0.517	0.686	0.652	0.734	0.702	0.283	0.565	0.764	0.43	4	oncogene
P00533/L833M	P00533	EGFR	EGFR_HUMAN	L833M	418	Catalytic-loop	-	-	LEDRRlHRDLA	0.808	0.072	0.12	0.207	0.225	0.371	0.158	0.249	0.246	0.567	0.229	4	oncogene
P00533/T854A	P00533	EGFR	EGFR_HUMAN	T854A	478	Catalytic-loop	-	-	QHVKItFGLAK	0.471	0.252	0.276	0.454	0.391	0.468	0.408	0.374	0.39	0.527	0.381	4	oncogene
P00533/V802F	P00533	EGFR	EGFR_HUMAN	V802F	253	αD	-	-	CLLDYvEHKDN	0.307	0.318	0.375	0.503	0.463	0.552	0.469	0.4	0.423	0.61	0.393	4	oncogene
P04629/E581K	P04629	NTRK1	NTRK1_HUMAN	E581K	216	β4/β5-loop	-	-	FGVCTeRPLLM	0.586	0.18	0.234	0.239	0.241	0.524	0.309	0.242	0.212	0.67	0.254	4	oncogene, TSG, fusion
P04629/R748Q	P04629	NTRK1	NTRK1_HUMAN	R748Q	681	αG/αH-loop	-	-	GRELErRACPP	0.593	0.163	0.245	0.228	0.228	0.484	0.264	0.252	0.19	0.636	0.145	4	oncogene, TSG, fusion
P06241/A526V	P06241	FYN	FYN_HUMAN	A526V	856	αI	-	-	EDYFTaEPQYQ	0.488	0.204	0.308	0.364	0.329	0.572	0.333	0.243	0.304	0.692	0.233	4	NA
P07949/R873W	P07949	RET	RET_HUMAN	R873W	424	Catalytic-loop;HrD-motif	-	-	MKLVHrLAARN	0.2	0.503	0.297	0.741	0.664	0.33	0.588	0.607	0.754	0.334	0.422	4	oncogene, fusion
P08922/E2071K	P08922	ROS1	ROS1_HUMAN	E2071K	393	αE	-	-	GCVYLeMHFIH	0.171	0.526	0.303	0.607	0.635	0.423	0.523	0.533	0.602	0.433	0.479	4	oncogene, fusion
P10721/D696Y	P10721	KIT	KIT_HUMAN	D696Y	267	αD/αE-loop	-	-	CSKQEdAEAAL	0.37	0.241	0.389	0.452	0.409	0.509	0.402	0.346	0.365	0.629	0.385	4	oncogene
P11309/C161Y	P11309	PIM1	PIM1_HUMAN	C161Y	405	Catalytic-loop	-	-	RHCHNcVLHRD	0.353	0.29	0.358	0.512	0.524	0.473	0.462	0.401	0.495	0.571	0.459	4	oncogene, fusion
P11309/D128N	P11309	PIM1	PIM1_HUMAN	D128N	248	β5/αD-loop	-	-	PEPVQdFDFIT	0.271	0.3	0.429	0.568	0.55	0.466	0.528	0.424	0.456	0.556	0.496	4	oncogene, fusion
P11309/E35K	P11309	PIM1	PIM1_HUMAN	E35K	28	N-term-β1	-	-	EKEPLeQYQVG	0.622	0.108	0.27	0.355	0.33	0.538	0.315	0.272	0.279	0.602	0.23	4	oncogene, fusion
P11309/L129F	P11309	PIM1	PIM1_HUMAN	L129F	249	αD	-	-	EPVQDlDFITE	0.233	0.431	0.336	0.563	0.555	0.444	0.466	0.451	0.482	0.518	0.513	4	oncogene, fusion
P11309/L177F	P11309	PIM1	PIM1_HUMAN	L177F	438	Catalytic-loop	-	-	NILIDlRGELK	0.56	0.164	0.276	0.3	0.275	0.484	0.296	0.244	0.212	0.657	0.241	4	oncogene, fusion
P11309/L177V	P11309	PIM1	PIM1_HUMAN	L177V	438	Catalytic-loop	-	-	NILIDlRGELK	0.569	0.176	0.255	0.303	0.242	0.496	0.286	0.211	0.195	0.664	0.275	4	oncogene, fusion
P11309/L9F	P11309	PIM1	PIM1_HUMAN	L9F	2	N-term-β1	-	-	SKINSlHLRAA	0.565	0.191	0.245	0.441	0.451	0.476	0.38	0.351	0.314	0.522	0.374	4	oncogene, fusion
P11309/P81T	P11309	PIM1	PIM1_HUMAN	P81T	124	αC	-	-	DWGELpGTRVP	0.369	0.287	0.344	0.386	0.346	0.48	0.384	0.338	0.296	0.594	0.319	4	oncogene, fusion
P15056/D587N	P15056	BRAF	BRAF_HUMAN	D587N	472	Catalytic-loop	-	-	IFLHEdTVKIG	0.707	0.093	0.2	0.204	0.218	0.418	0.223	0.177	0.145	0.629	0.211	4	oncogene, fusion
P15056/I592M	P15056	BRAF	BRAF_HUMAN	I592M	477	Catalytic-loop	-	-	DLTVKiDFGLA	0.25	0.448	0.302	0.614	0.598	0.481	0.554	0.517	0.544	0.564	0.603	4	oncogene, fusion
P15056/K601I	P15056	BRAF	BRAF_HUMAN	K601I	492	A-loop	ac	-	GLATVkRWSGS	0.234	0.318	0.448	0.741	0.7	0.56	0.736	0.364	0.593	0.596	0.413	4	oncogene, fusion
P15056/S614P	P15056	BRAF	BRAF_HUMAN	S614P	530	A-loop	p	-	QFEQLsSILWM	0.147	0.586	0.267	0.82	0.857	0.304	0.76	0.662	0.793	0.376	0.484	4	oncogene, fusion
P15056/S616F	P15056	BRAF	BRAF_HUMAN	S616F	536	A-loop	-	-	EQLSGsLWMAP	0.111	0.713	0.177	0.815	0.786	0.302	0.672	0.737	0.842	0.288	0.515	4	oncogene, fusion
P16234/N659Y	P16234	PDGFRA	PGFRA_HUMAN	N659Y	180	αC/β4-loop	-	-	HLNIVnLGACT	0.119	0.27	0.611	0.764	0.675	0.703	0.779	0.385	0.519	0.699	0.782	4	oncogene, fusion
P21709/G779S	P21709	EPHA1	EPHA1_HUMAN	G779S	507	A-loop	-	-	LDDFDgYETQG	0.459	0.137	0.405	0.563	0.46	0.576	0.509	0.228	0.347	0.714	0.407	4	NA
P21802/E695K	P21802	FGFR2	FGFR2_HUMAN	E695K	597	αF	-	-	GVLMWeFTLGG	0.142	0.572	0.286	0.677	0.676	0.35	0.545	0.605	0.734	0.366	0.495	4	oncogene, fusion
P21802/E718K	P21802	FGFR2	FGFR2_HUMAN	E718K	661	αG/αH-loop	-	-	FKLLKeHRMDK	0.555	0.169	0.276	0.276	0.262	0.571	0.288	0.232	0.23	0.714	0.199	4	oncogene, fusion
P21860/S882C	P21860	ERBB3	ERBB3_HUMAN	S882C	545	A-loop	-	-	WMALEsHFGKY	0.861	0.045	0.094	0.142	0.16	0.399	0.207	0.165	0.093	0.658	0.14	4	oncogene
P23458/L1010R	P23458	JAK1	JAK1_HUMAN	L1010R	433	Catalytic-loop	-	-	AARNVlESEHQ	0.109	0.693	0.198	0.783	0.772	0.23	0.563	0.686	0.749	0.28	0.623	4	oncogene, TSG
P24723/R625H	P24723	PRKCH	KPCL_HUMAN	R625H	863	C-term-αI	-	-	AQLNHrIEPPF	0.397	0.231	0.372	0.526	0.445	0.504	0.468	0.314	0.358	0.583	0.313	4	NA
P27361/R211P	P27361	MAPK3	MK03_HUMAN	R211P	541	A-loop	-	-	ATRWYrPEIML	0.128	0.594	0.277	0.714	0.716	0.42	0.552	0.596	0.718	0.365	0.525	4	NA
P29317/R861C	P29317	EPHA2	EPHA2_HUMAN	R861C	832	αH/αI-loop	-	-	QERARrKFADI	0.105	0.641	0.254	0.758	0.778	0.324	0.569	0.625	0.788	0.315	0.436	4	NA
P30530/G626R	P30530	AXL	UFO_HUMAN	G626R	240	β5/αD-loop	-	-	PFMKHgLHSFL	0.213	0.388	0.399	0.764	0.662	0.479	0.607	0.466	0.644	0.517	0.763	4	NA
P31152/R148K	P31152	MAPK4	MK04_HUMAN	R148K	424	Catalytic-loop;HrD-motif	-	-	ANVLHrLKPAN	0.14	0.502	0.358	0.766	0.766	0.468	0.629	0.547	0.736	0.432	0.492	4	NA
P36507/E207K	P36507	MAP2K2	MP2K2_HUMAN	E207K	465	Catalytic-loop	-	resistance	VNSRGeKLCDF	0.34	0.337	0.322	0.561	0.502	0.507	0.472	0.382	0.371	0.562	0.554	4	oncogene
P36507/L46F	P36507	MAP2K2	MP2K2_HUMAN	L46F	5	N-term-β1	-	resistance	LEELElEQQKK	0.453	0.235	0.312	0.435	0.391	0.518	0.41	0.309	0.35	0.645	0.42	4	oncogene
P36888/F594L	P36888	FLT3	FLT3_HUMAN	F594L	15	N-term-β1	-	-	YFYVDfEYEYD	0.345	0.216	0.439	0.518	0.554	0.561	0.55	0.336	0.427	0.646	0.427	4	oncogene
P43403/T312M	P43403	ZAP70	ZAP70_HUMAN	T312M	1	N-term-β1	-	-	PMPMDtVYESP	0.353	0.266	0.38	0.694	0.63	0.458	0.628	0.416	0.602	0.505	0.513	4	NA
P43405/R520C	P43405	SYK	KSYK_HUMAN	R520C	498	A-loop	-	-	LSKALrDENYY	0.389	0.162	0.45	0.605	0.521	0.523	0.568	0.316	0.346	0.658	0.497	4	oncogene, fusion
P45985/V321E	P45985	MAP2K4	MP2K4_HUMAN	V321E	673	αG/αH-loop	-	-	QLTQVvGDPPQ	0.213	0.467	0.32	0.548	0.542	0.443	0.505	0.505	0.585	0.496	0.489	4	oncogene, TSG
P48729/L160F	P48729	CSNK1A1	KC1A_HUMAN	L160F	482	A-loop	-	-	LIDFGlKKYRD	0.233	0.288	0.478	0.745	0.68	0.581	0.697	0.412	0.587	0.602	0.552	4	NA
P48729/S27F	P48729	CSNK1A1	KC1A_HUMAN	S27F	41	Gly-rich-loop;β1/β2-loop	-	-	KIGSGsGDIYL	0.231	0.424	0.345	0.725	0.723	0.435	0.605	0.563	0.685	0.439	0.519	4	NA
P49841/R180Q	P49841	GSK3B	GSK3B_HUMAN	R180Q	424	Catalytic-loop;HrD-motif	-	-	FGICHrIKPQN	0.119	0.549	0.332	0.762	0.794	0.436	0.653	0.598	0.8	0.41	0.505	4	NA
P52333/G908S	P52333	JAK3	JAK3_HUMAN	G908S	240	β5/αD-loop	-	-	EYLPSgLRDFL	0.174	0.402	0.423	0.737	0.667	0.511	0.595	0.489	0.613	0.513	0.745	4	oncogene
P52333/R887C	P52333	JAK3	JAK3_HUMAN	R887C	183	β4	-	-	FIVKYrVSYGP	0.325	0.231	0.445	0.613	0.527	0.475	0.554	0.334	0.45	0.604	0.499	4	oncogene
P52333/S1005F	P52333	JAK3	JAK3_HUMAN	S1005F	582	A-loop	-	-	SDNIFsQSDVW	0.294	0.325	0.381	0.521	0.567	0.492	0.536	0.432	0.495	0.606	0.395	4	oncogene
P53667/P576A	P53667	LIMK1	LIMK1_HUMAN	P576A	802	αG/αH-loop	-	-	CPPNCpSFFPI	0.216	0.56	0.224	0.713	0.746	0.258	0.531	0.686	0.75	0.254	0.513	4	NA
P53779/R258C	P53779	MAPK10	MK10_HUMAN	R258C	601	αF	-	-	MGEMVrKILFP	0.669	0.127	0.204	0.308	0.305	0.422	0.291	0.214	0.22	0.66	0.183	4	NA
P54760/R889W	P54760	EPHB4	EPHB4_HUMAN	R889W	865	C-term-αI	-	-	LKIVArNGGAS	0.485	0.246	0.269	0.438	0.377	0.467	0.388	0.29	0.331	0.625	0.261	4	NA
P54764/R883H	P54764	EPHA4	EPHA4_HUMAN	R883H	855	αI	-	-	LDKLIrPNSLK	0.483	0.218	0.299	0.319	0.308	0.517	0.363	0.215	0.24	0.686	0.242	4	NA
Q00536/M441I	Q00536	CDK16	CDK16_HUMAN	M441I	847	αI	-	-	SAEDAmHPFFL	0.372	0.256	0.372	0.447	0.384	0.49	0.427	0.361	0.313	0.633	0.362	4	NA
Q01973/S585F	Q01973	ROR1	ROR1_HUMAN	S585F	357	αD/αE-loop	-	-	DGTVKsLDHGD	0.455	0.278	0.267	0.501	0.449	0.444	0.413	0.399	0.405	0.623	0.285	4	NA
Q02750/F53C	Q02750	MAP2K1	MP2K1_HUMAN	F53C	16	N-term-β1	-	-	KRLEAfTQKQK	0.23	0.446	0.324	0.724	0.689	0.445	0.516	0.516	0.629	0.502	0.512	4	oncogene
Q02750/P124Q	Q02750	MAP2K1	MP2K1_HUMAN	P124Q	172	αC/β4-loop	-	-	HECNSpIVGFY	0.331	0.248	0.421	0.499	0.48	0.564	0.561	0.335	0.405	0.639	0.565	4	oncogene
Q02846/E699D	Q02846	GUCY2D	GUC2D_HUMAN	E699D	526	A-loop	-	-	QKVLPePRAED	0.697	0.08	0.223	0.313	0.261	0.45	0.332	0.265	0.182	0.619	0.175	4	NA
Q06187/C527S	Q06187	BTK	BTK_HUMAN	C527S	432	Catalytic-loop	-	-	LAARNcVNDQG	0.17	0.595	0.235	0.769	0.706	0.32	0.578	0.632	0.721	0.294	0.612	4	oncogene, TSG
Q06187/I443T	Q06187	BTK	BTK_HUMAN	I443T	147	αC	-	-	SEDEFiEAKVM	0.327	0.264	0.41	0.555	0.577	0.457	0.454	0.461	0.506	0.559	0.436	4	oncogene, TSG
Q07002/S214F	Q07002	CDK18	CDK18_HUMAN	S214F	219	β4/β5-loop	-	-	IHTDRsTLVFE	0.414	0.232	0.354	0.458	0.44	0.548	0.401	0.318	0.386	0.625	0.352	4	NA
Q13237/R684Q	Q13237	PRKG2	KGP2_HUMAN	R684Q	820	αH	-	-	PEDLIrLCRQN	0.813	0.062	0.125	0.18	0.217	0.492	0.238	0.176	0.157	0.687	0.142	4	NA
Q14164/A243V	Q14164	IKBKE	IKKE_HUMAN	A243V	872	C-term-αI	-	-	TTEKPaAIAGA	0.448	0.201	0.351	0.322	0.264	0.541	0.365	0.271	0.216	0.681	0.298	4	NA
Q15208/P345S	Q15208	STK38	STK38_HUMAN	P345S	697	αG/αH-loop	-	-	TLTFPpVPISE	0.329	0.23	0.441	0.48	0.392	0.587	0.466	0.345	0.36	0.716	0.392	4	NA
Q15375/M708I	Q15375	EPHA7	EPHA7_HUMAN	M708I	228	β5	-	-	RGKPVmVIEFM	0.335	0.246	0.419	0.479	0.41	0.555	0.476	0.326	0.367	0.641	0.382	4	inconclusive
Q15831/G251C	Q15831	STK11	STK11_HUMAN	G251C	604	αF/αG-loop	-	-	YNITTgYPFEG	0.209	0.379	0.412	0.67	0.712	0.502	0.645	0.443	0.636	0.575	0.547	4	TSG
Q15831/K78N	Q15831	STK11	STK11_HUMAN	K78N	96	β3;Catalytic-Lys	-	-	CRRAVkLKKKK	0.003	0.995	0.002	0.985	0.989	0.021	0.686	0.969	0.987	0.024	0.456	4	TSG
Q15831/L140P	Q15831	STK11	STK11_HUMAN	L140P	253	αD	-	-	GMQEMlSVPEK	0.193	0.417	0.39	0.703	0.69	0.532	0.601	0.521	0.667	0.579	0.594	4	TSG
Q16584/A178D	Q16584	MAP3K11	M3K11_HUMAN	A178D	180	αC/β4-loop	-	-	HPNIIaKAVCL	0.337	0.11	0.553	0.577	0.476	0.728	0.632	0.175	0.186	0.806	0.594	4	NA
Q16584/G198S	Q16584	MAP3K11	M3K11_HUMAN	G198S	239	β5/αD-loop	-	-	MEYAAgPLSRA	0.247	0.348	0.406	0.619	0.624	0.508	0.579	0.37	0.558	0.619	0.648	4	NA
Q16671/E248K	Q16671	AMHR2	AMHR2_HUMAN	E248K	149	αC	-	-	ERALYePGLQH	0.656	0.183	0.161	0.409	0.313	0.368	0.308	0.311	0.372	0.498	0.26	4	NA
Q59H18/G526C	Q59H18	TNNI3K	TNI3K_HUMAN	G526C	184	β4	-	-	VIQFVgCLNDP	0.15	0.586	0.264	0.757	0.726	0.349	0.614	0.583	0.729	0.348	0.556	4	NA
Q5MAI5/P202L	Q5MAI5	CDKL4	CDKL4_HUMAN	P202L	631	αF/αG-loop	-	-	GQPLWpKSDVD	0.3	0.436	0.264	0.564	0.61	0.395	0.504	0.515	0.615	0.415	0.516	4	NA
Q5TCX8/E336K	Q5TCX8	MAP3K21	M3K21_HUMAN	E336K	597	αF	-	-	GVLLWeLTGEV	0.133	0.554	0.313	0.722	0.701	0.405	0.609	0.615	0.766	0.43	0.573	4	NA
Q6XUX3/H815Y	Q6XUX3	DSTYK	DUSTY_HUMAN	H815Y	540	A-loop	-	-	VGTPIhAPELF	0.421	0.245	0.335	0.439	0.483	0.511	0.45	0.307	0.363	0.61	0.248	4	NA
Q76MJ5/A703V	Q76MJ5	ERN2	ERN2_HUMAN	A703V	584	αF	-	-	DSPTSaDIFSA	0.314	0.396	0.289	0.511	0.592	0.447	0.465	0.494	0.428	0.502	0.448	4	NA
Q86V86/D19H	Q86V86	PIM3	PIM3_HUMAN	D19H	10	N-term-β1	-	-	GPGGVdLPVKI	0.758	0.102	0.14	0.27	0.277	0.412	0.248	0.263	0.196	0.594	0.211	4	NA
Q86Z02/P430S	Q86Z02	HIPK1	HIPK1_HUMAN	P430S	701	αG/αH-loop	-	-	FFNRDpLGYPL	0.725	0.088	0.187	0.148	0.152	0.478	0.241	0.173	0.106	0.693	0.166	4	NA
Q8IVH8/I283F	Q8IVH8	MAP4K3	M4K3_HUMAN	I283F	862	C-term-αI	-	-	TRSLAiLLDKV	0.329	0.319	0.353	0.451	0.451	0.485	0.466	0.427	0.434	0.596	0.275	4	NA
Q8N568/R592Q	Q8N568	DCLK2	DCLK2_HUMAN	R592Q	631	αF/αG-loop	-	-	GFPPFrENNLQ	0.273	0.402	0.325	0.575	0.563	0.521	0.495	0.403	0.531	0.594	0.349	4	NA
Q8NB16/D390N	Q8NB16	MLKL	MLKL_HUMAN	D390N	582	A-loop	-	-	VFYQYdKSEIY	0.703	0.132	0.165	0.23	0.295	0.478	0.333	0.232	0.214	0.645	0.164	4	NA
Q8NE28/R285Q	Q8NE28	STKLD1	STKL1_HUMAN	R285Q	832	αH/αI-loop	-	-	IDPSDrTIKDV	0.124	0.649	0.227	0.687	0.741	0.34	0.562	0.618	0.706	0.375	0.408	4	NA
Q96J92/S259L	Q96J92	WNK4	WNK4_HUMAN	S259L	239	β5/αD-loop	-	-	TELMTsTLKTY	0.267	0.395	0.339	0.59	0.598	0.486	0.549	0.467	0.545	0.545	0.604	4	NA
Q96L34/R265Q	Q96L34	MARK4	MARK4_HUMAN	R265Q	660	αG	-	-	NLKELrRVLRG	0.21	0.359	0.431	0.635	0.628	0.538	0.587	0.493	0.623	0.572	0.382	4	NA
Q99640/E123K	Q99640	PKMYT1	PMYT1_HUMAN	E123K	44	β2	-	-	HGSYGeFKVRS	0.334	0.246	0.42	0.577	0.514	0.58	0.499	0.314	0.42	0.617	0.547	4	NA
Q9BYT3/G198E	Q9BYT3	STK33	STK33_HUMAN	G198E	240	β5/αD-loop	-	-	ELCEDgLKEIL	0.197	0.347	0.457	0.719	0.553	0.523	0.608	0.393	0.578	0.609	0.67	4	NA
Q9C098/E562K	Q9C098	DCLK3	DCLK3_HUMAN	E562K	649	αG	-	-	ERDQDeFNIIQ	0.386	0.239	0.375	0.419	0.352	0.495	0.353	0.311	0.339	0.605	0.337	4	NA
Q9H3Y6/I260V	Q9H3Y6	SRMS	SRMS_HUMAN	I260V	98	β3	-	-	VAIKViSANMK	0.783	0.066	0.151	0.319	0.313	0.481	0.268	0.208	0.277	0.623	0.256	4	NA
Q9NR20/R208W	Q9NR20	DYRK4	DYRK4_HUMAN	R208W	372	αE	-	-	SLSIVrFTLSV	0.153	0.508	0.34	0.664	0.709	0.401	0.566	0.551	0.668	0.436	0.447	4	NA
Q9P286/G675E	Q9P286	PAK5	PAK5_HUMAN	G675E	816	αH	-	-	SSVLRgLDLML	0.415	0.147	0.437	0.291	0.21	0.542	0.375	0.199	0.221	0.75	0.313	4	NA
Q9P2K8/G868V	Q9P2K8	EIF2AK4	E2AK4_HUMAN	G868V	481	A-loop;DFG-motif	-	-	KIGDFgATDHL	0.111	0.464	0.425	0.826	0.848	0.455	0.707	0.585	0.794	0.469	0.598	4	NA
Q9P2K8/S959L	Q9P2K8	EIF2AK4	E2AK4_HUMAN	S959L	690	αG/αH-loop	-	-	LRDPTsKFPED	0.74	0.093	0.167	0.186	0.204	0.383	0.22	0.19	0.132	0.662	0.158	4	NA
Q9UEE5/M134I	Q9UEE5	STK17A	ST17A_HUMAN	M134I	227	β4/β5-loop	-	-	ETASEmLVLEY	0.797	0.055	0.147	0.189	0.182	0.4	0.238	0.144	0.142	0.658	0.221	4	NA
Q9UM73/F1174S	Q9UM73	ALK	ALK_HUMAN	F1174S	159	αC/β4-loop	-	-	LIISKfHQNIV	0.17	0.444	0.386	0.743	0.687	0.485	0.622	0.559	0.652	0.521	0.747	4	oncogene, fusion
Q9UM73/R1209Q	Q9UM73	ALK	ALK_HUMAN	R1209Q	254	αD	-	-	LKSFLrTRPRP	0.286	0.227	0.487	0.47	0.45	0.577	0.504	0.318	0.39	0.684	0.324	4	oncogene, fusion
Q9Y243/D260N	Q9Y243	AKT3	AKT3_HUMAN	D260N	389	αE	-	-	IVSALdLHSGK	0.522	0.171	0.307	0.262	0.284	0.464	0.333	0.276	0.206	0.629	0.223	4	oncogene
Q9Y2H1/D183N	Q9Y2H1	STK38L	ST38L_HUMAN	D183N	357	αD/αE-loop	-	-	LLMKKdLTEEE	0.347	0.376	0.277	0.539	0.471	0.448	0.42	0.387	0.381	0.601	0.353	4	NA
Q9Y2K2/L256H	Q9Y2K2	SIK3	SIK3_HUMAN	L256H	598	αF	-	-	VVLYVlCGALP	0.146	0.623	0.23	0.771	0.754	0.319	0.592	0.658	0.777	0.278	0.623	4	NA
O15146/E794K	O15146	MUSK	MUSK_HUMAN	E794K	597	αF	-	-	GVVLWeFSYGL	0.146	0.56	0.294	0.683	0.688	0.363	0.55	0.595	0.72	0.4	0.538	4	NA
O15146/R724Q	O15146	MUSK	MUSK_HUMAN	R724Q	424	Catalytic-loop;HrD-motif	-	-	RKFVHrLATRN	0.187	0.473	0.34	0.722	0.693	0.396	0.591	0.577	0.696	0.39	0.5	4	NA
O15146/R858H	O15146	MUSK	MUSK_HUMAN	R858H	852	αI	-	-	HRILErCERAE	0.718	0.107	0.175	0.217	0.206	0.462	0.265	0.216	0.15	0.67	0.124	4	NA
O43283/A189V	O43283	MAP3K13	M3K13_HUMAN	A189V	83	β2/β3-loop	-	-	LGKFRaEVAIK	0.63	0.143	0.227	0.237	0.276	0.491	0.271	0.252	0.222	0.695	0.168	4	oncogene, TSG
O60674/D873N	O60674	JAK2	JAK2_HUMAN	D873N	75	β2/β3-loop	-	-	YDPLQdTGEVV	0.341	0.229	0.43	0.441	0.345	0.54	0.453	0.278	0.331	0.632	0.322	4	oncogene, fusion
O76039/R81W	O76039	CDKL5	CDKL5_HUMAN	R81W	189	β4/β5-loop	-	-	KEAFRrGKLYL	0.282	0.288	0.43	0.584	0.511	0.502	0.562	0.323	0.446	0.588	0.376	4	NA
O96017/L226F	O96017	CHEK2	CHK2_HUMAN	L226F	37	β1	-	-	IMSKTlSGACG	0.324	0.295	0.382	0.606	0.569	0.443	0.541	0.388	0.439	0.489	0.543	4	TSG
P00519/E282Q	P00519	ABL1	ABL1_HUMAN	E282Q	145	αC	-	-	TMEVEeLKEAA	0.405	0.228	0.367	0.478	0.416	0.522	0.455	0.319	0.313	0.645	0.311	4	oncogene, fusion
P00519/R332W	P00519	ABL1	ABL1_HUMAN	R332W	355	αD/αE-loop	-	-	LRECNrEVNAV	0.272	0.25	0.478	0.607	0.534	0.514	0.566	0.368	0.425	0.57	0.391	4	oncogene, fusion
P00519/S420F	P00519	ABL1	ABL1_HUMAN	S420F	585	αF	-	-	KFSIKsVWAFG	0.22	0.351	0.429	0.677	0.65	0.575	0.643	0.415	0.55	0.641	0.547	4	oncogene, fusion
P00533/E884K	P00533	EGFR	EGFR_HUMAN	E884K	544	A-loop;APE-motif	-	-	KWMALeILHRI	0.115	0.724	0.161	0.798	0.823	0.229	0.518	0.779	0.779	0.224	0.492	4	oncogene
P00533/G721S	P00533	EGFR	EGFR_HUMAN	G721S	40	β1;Gly-rich-loop	-	-	KVLGSgFGTVY	0.128	0.685	0.187	0.78	0.776	0.357	0.638	0.671	0.773	0.394	0.595	4	oncogene
P00533/H773R	P00533	EGFR	EGFR_HUMAN	H773R	173	αC/β4-loop	-	-	SVDNPhCRLLG	0.302	0.294	0.404	0.551	0.488	0.526	0.541	0.4	0.47	0.615	0.471	4	oncogene
P00533/I759N	P00533	EGFR	EGFR_HUMAN	I759N	146	αC	-	-	KANKEiDEAYV	0.195	0.477	0.328	0.693	0.693	0.444	0.568	0.571	0.648	0.46	0.581	4	oncogene
P00533/P694S	P00533	EGFR	EGFR_HUMAN	P694S	12	N-term-β1	-	-	VEPLTpGEAPN	0.284	0.41	0.305	0.648	0.612	0.437	0.67	0.502	0.613	0.433	0.505	4	oncogene
P00533/R832C	P00533	EGFR	EGFR_HUMAN	R832C	406	Catalytic-loop	-	-	YLEDRrVHRDL	0.328	0.314	0.358	0.532	0.468	0.481	0.464	0.422	0.458	0.455	0.371	4	oncogene
P00533/R958H	P00533	EGFR	EGFR_HUMAN	R958H	832	αH/αI-loop	-	-	IDADSrKFREL	0.148	0.606	0.246	0.702	0.697	0.353	0.538	0.577	0.661	0.369	0.443	4	oncogene
P00533/V689M	P00533	EGFR	EGFR_HUMAN	V689M	7	N-term-β1	-	activating	QERELvPLTPS	0.613	0.174	0.212	0.284	0.251	0.466	0.246	0.292	0.184	0.649	0.272	4	oncogene
P00533/V834M	P00533	EGFR	EGFR_HUMAN	V834M	419	Catalytic-loop	-	-	EDRRLvRDLAA	0.53	0.232	0.238	0.284	0.214	0.402	0.273	0.345	0.214	0.558	0.268	4	oncogene
P04049/E478K	P04049	RAF1	RAF1_HUMAN	E478K	439	Catalytic-loop	-	-	NIFLHeLTVKI	0.349	0.231	0.42	0.443	0.436	0.545	0.469	0.29	0.34	0.672	0.41	4	oncogene, fusion
P04629/R508Q	P04629	NTRK1	NTRK1_HUMAN	R508Q	27	N-term-β1	-	-	HHIKRrIVLKW	0.74	0.112	0.148	0.32	0.244	0.464	0.285	0.264	0.26	0.675	0.156	4	oncogene, TSG, fusion
P05129/A461T	P05129	PRKCG	KPCG_HUMAN	A461T	378	αE	-	-	HAAFYaEIAIG	0.31	0.305	0.386	0.44	0.415	0.471	0.439	0.351	0.374	0.6	0.39	4	NA
P05129/R345C	P05129	PRKCG	KPCG_HUMAN	R345C	23	N-term-β1	-	-	GASPGrHISDF	0.257	0.377	0.366	0.684	0.603	0.484	0.54	0.482	0.674	0.508	0.374	4	NA
P05771/D523N	P05771	PRKCB	KPCB_HUMAN	D523N	587	αF	-	-	YGKSVdWAFGV	0.165	0.564	0.272	0.697	0.665	0.328	0.555	0.568	0.675	0.379	0.533	4	inconclusive
P05771/R592C	P05771	PRKCB	KPCB_HUMAN	R592C	843	αI	-	-	GPEGErIKEHA	0.328	0.27	0.402	0.547	0.515	0.489	0.507	0.402	0.433	0.593	0.351	4	inconclusive
P07949/D903N	P07949	RET	RET_HUMAN	D903N	504	A-loop	-	-	DVYEEdYVKRS	0.197	0.302	0.501	0.698	0.627	0.613	0.705	0.464	0.565	0.594	0.474	4	oncogene, fusion
P07949/Y791F	P07949	RET	RET_HUMAN	Y791F	183	β4	p	-	HVIKLyACSQD	0.361	0.304	0.335	0.56	0.521	0.46	0.5	0.28	0.465	0.613	0.321	4	oncogene, fusion
P08631/S433F	P08631	HCK	HCK_HUMAN	S433F	550	A-loop	-	-	AINFGsTIKSD	0.44	0.214	0.346	0.484	0.374	0.401	0.403	0.326	0.348	0.582	0.323	4	NA
P09619/S650L	P09619	PDGFRB	PGFRB_HUMAN	S650L	148	αC	-	-	KQALMsLKIMS	0.224	0.352	0.424	0.599	0.613	0.526	0.612	0.451	0.489	0.627	0.509	4	oncogene, fusion
P10721/L679F	P10721	KIT	KIT_HUMAN	L679F	250	αD	-	-	CYGDLlFLRRK	0.304	0.335	0.361	0.469	0.421	0.469	0.435	0.37	0.382	0.544	0.406	4	oncogene
P10721/S864F	P10721	KIT	KIT_HUMAN	S864F	601	αF	-	-	LWELFsGSSPY	0.284	0.395	0.321	0.614	0.563	0.467	0.596	0.463	0.51	0.502	0.47	4	oncogene
P10721/T847M	P10721	KIT	KIT_HUMAN	T847M	582	A-loop	-	-	FNCVYtESDVW	0.157	0.496	0.347	0.65	0.693	0.454	0.625	0.548	0.618	0.471	0.526	4	oncogene
P10721/V825I	P10721	KIT	KIT_HUMAN	V825I	525	A-loop	-	-	DSNYVvGNARL	0.631	0.108	0.261	0.472	0.449	0.618	0.553	0.18	0.333	0.76	0.32	4	oncogene
P11309/G99A	P11309	PIM1	PIM1_HUMAN	G99A	170	αC/β4-loop	-	-	KKVSSgSGVIR	0.285	0.368	0.347	0.501	0.516	0.38	0.453	0.469	0.518	0.444	0.442	4	oncogene, fusion
P11309/V126L	P11309	PIM1	PIM1_HUMAN	V126L	240	β5/αD-loop	-	-	ERPEPvDLFDF	0.549	0.175	0.276	0.399	0.289	0.553	0.366	0.24	0.263	0.715	0.52	4	oncogene, fusion
P15056/K601T	P15056	BRAF	BRAF_HUMAN	K601T	492	A-loop	ac	-	GLATVkRWSGS	0.212	0.272	0.516	0.68	0.746	0.528	0.753	0.387	0.615	0.613	0.482	4	oncogene, fusion
P15056/N581T	P15056	BRAF	BRAF_HUMAN	N581T	431	Catalytic-loop	-	-	DLKSNnFLHED	0.058	0.711	0.231	0.823	0.862	0.29	0.715	0.712	0.808	0.295	0.606	4	oncogene, fusion
P15056/S602Y	P15056	BRAF	BRAF_HUMAN	S602Y	498	A-loop	p	-	LATVKsWSGSH	0.182	0.215	0.603	0.714	0.676	0.653	0.694	0.338	0.522	0.697	0.586	4	oncogene, fusion
P16234/G829R	P16234	PDGFRA	PGFRA_HUMAN	G829R	472	Catalytic-loop	-	-	VLLAQgIVKIC	0.316	0.261	0.423	0.544	0.506	0.489	0.473	0.381	0.381	0.598	0.496	4	oncogene, fusion
P17612/A148T	P17612	PRKACA	KAPCA_HUMAN	A148T	378	αE	-	-	HARFYaQIVLT	0.342	0.329	0.329	0.359	0.349	0.462	0.4	0.325	0.348	0.603	0.356	4	oncogene
P21802/M640I	P21802	FGFR2	FGFR2_HUMAN	M640I	475	Catalytic-loop	-	-	TENNVmIADFG	0.329	0.209	0.462	0.489	0.464	0.551	0.471	0.4	0.408	0.564	0.411	4	oncogene, fusion
P21802/R759Q	P21802	FGFR2	FGFR2_HUMAN	R759Q	852	αI	-	-	VEDLDrLTLTT	0.661	0.104	0.235	0.205	0.201	0.508	0.251	0.197	0.167	0.663	0.138	4	oncogene, fusion
P22455/P712T	P22455	FGFR4	FGFR4_HUMAN	P712T	701	αG/αH-loop	-	-	RMDRPpCPPEL	0.692	0.131	0.177	0.218	0.21	0.491	0.26	0.211	0.159	0.673	0.199	4	oncogene
P22612/A299T	P22612	PRKACG	KAPCG_HUMAN	A299T	853	αI	-	-	NHKWFaTSWIA	0.744	0.089	0.167	0.172	0.154	0.439	0.199	0.202	0.116	0.693	0.171	4	NA
P23458/R879H	P23458	JAK1	JAK1_HUMAN	R879H	35	β1	-	-	FLKRIrLGEGH	0.736	0.117	0.147	0.201	0.241	0.431	0.224	0.258	0.188	0.55	0.169	4	oncogene, TSG
P23458/T901R	P23458	JAK1	JAK1_HUMAN	T901R	79	β2/β3-loop	-	-	PEGDNtEQVAV	0.305	0.32	0.375	0.525	0.481	0.498	0.538	0.394	0.478	0.617	0.406	4	oncogene, TSG
P25092/G549R	P25092	GUCY2C	GUC2C_HUMAN	G549R	184	β4	-	-	LTKFYgVKLDT	0.123	0.572	0.305	0.763	0.724	0.356	0.623	0.6	0.759	0.378	0.589	4	NA
P28482/R77C	P28482	MAPK1	MK01_HUMAN	R77C	156	αC/β4-loop	-	-	IKILLrRHENI	0.239	0.243	0.518	0.559	0.582	0.629	0.606	0.32	0.473	0.684	0.439	4	oncogene
P29320/D904Y	P29320	EPHA3	EPHA3_HUMAN	D904Y	876	C-term-αI	-	-	SNLLLdSNVDI	0.3	0.348	0.352	0.58	0.524	0.532	0.49	0.421	0.515	0.593	0.431	4	inconclusive
P29323/R610W	P29323	EPHB2	EPHB2_HUMAN	R610W	19	N-term-β1	-	-	PNEAVrFAKEI	0.164	0.446	0.39	0.77	0.681	0.525	0.59	0.465	0.697	0.534	0.51	4	NA
P31751/R371L	P31751	AKT2	AKT2_HUMAN	R371L	701	αG/αH-loop	-	-	EIRFPrLSPEA	0.369	0.232	0.398	0.437	0.467	0.467	0.432	0.355	0.354	0.604	0.315	4	oncogene
P35968/G1063E	P35968	KDR	VGFR2_HUMAN	G1063E	527	A-loop	-	-	DYVRKgARLPL	0.258	0.332	0.41	0.623	0.581	0.523	0.579	0.444	0.577	0.499	0.455	4	oncogene
P35968/G1145E	P35968	KDR	VGFR2_HUMAN	G1145E	825	αH/αI-loop	-	-	LDCWHgPSQRP	0.844	0.028	0.128	0.112	0.119	0.456	0.195	0.092	0.09	0.743	0.139	4	oncogene
P36507/P331S	P36507	MAP2K2	MP2K2_HUMAN	P331S	794	αG/αH-loop	-	-	VNEPPpLPNGV	0.262	0.402	0.336	0.597	0.57	0.429	0.479	0.464	0.533	0.482	0.468	4	oncogene
P36888/E708K	P36888	FLT3	FLT3_HUMAN	E708K	258	αD/αE-loop	-	-	LRSKReFHRTW	0.712	0.088	0.2	0.218	0.177	0.495	0.249	0.179	0.134	0.701	0.188	4	oncogene
P36888/E880K	P36888	FLT3	FLT3_HUMAN	E880K	597	αF	-	-	GILLWeFSLGV	0.24	0.486	0.274	0.525	0.49	0.379	0.472	0.51	0.618	0.409	0.4	4	oncogene
P36888/M908I	P36888	FLT3	FLT3_HUMAN	M908I	676	αG/αH-loop	-	-	QNGFKmQPFYA	0.252	0.313	0.434	0.56	0.521	0.495	0.525	0.447	0.461	0.576	0.505	4	oncogene
P36888/N676S	P36888	FLT3	FLT3_HUMAN	N676S	180	αC/β4-loop	-	-	HENIVnLGACT	0.13	0.171	0.699	0.739	0.665	0.759	0.782	0.295	0.454	0.79	0.797	4	oncogene
P36888/S638L	P36888	FLT3	FLT3_HUMAN	S638L	83	β2/β3-loop	-	-	SKTGVsQVAVK	0.258	0.254	0.488	0.571	0.566	0.571	0.58	0.398	0.473	0.679	0.507	4	oncogene
P36896/T202I	P36896	ACVR1B	ACV1B_HUMAN	T202I	23	N-term-β1	-	-	LFVQRtARTIV	0.192	0.528	0.28	0.731	0.683	0.381	0.574	0.605	0.692	0.424	0.483	4	TSG
P36897/S235F	P36897	TGFBR1	TGFR1_HUMAN	S235F	102	β3/αC-loop	-	-	AVKIFsREERS	0.254	0.331	0.415	0.609	0.624	0.444	0.565	0.497	0.554	0.511	0.491	4	NA
P42679/R356H	P42679	MATK	MATK_HUMAN	R356H	430	Catalytic-loop	-	-	RDLAArILVSE	0.286	0.437	0.277	0.669	0.6	0.386	0.542	0.548	0.571	0.407	0.384	4	NA
P42685/E403K	P42685	FRK	FRK_HUMAN	E403K	544	A-loop;APE-motif	-	-	KWTAPeIRSNK	0.074	0.763	0.163	0.811	0.842	0.233	0.561	0.778	0.853	0.216	0.558	4	NA
P43403/E553K	P43403	ZAP70	ZAP70_HUMAN	E553K	660	αG	-	-	VMAFIeGKRME	0.706	0.109	0.185	0.241	0.225	0.422	0.264	0.205	0.153	0.622	0.212	4	NA
P43403/R496H	P43403	ZAP70	ZAP70_HUMAN	R496H	526	A-loop	-	-	SYYTArAGKWP	0.617	0.123	0.26	0.285	0.294	0.436	0.339	0.301	0.2	0.584	0.141	4	NA
P45985/A378T	P45985	MAP2K4	MP2K4_HUMAN	A378T	863	C-term-αI	-	-	RAVEVaYVCKI	0.692	0.08	0.228	0.276	0.226	0.44	0.256	0.223	0.195	0.642	0.268	4	oncogene, TSG
P48730/E238K	P48730	CSNK1D	KC1D_HUMAN	E238K	866	C-term-αI	-	-	MSTPIeLCKGY	0.236	0.422	0.341	0.648	0.595	0.472	0.513	0.461	0.563	0.558	0.428	4	NA
P51617/S532L	P51617	IRAK1	IRAK1_HUMAN	S532L	870	C-term-αI	-	neutral	GVPGHsAASCI	0.768	0.121	0.111	0.242	0.256	0.37	0.247	0.2	0.173	0.632	0.166	4	NA
P54646/E168K	P54646	PRKAA2	AAPK2_HUMAN	E168K	504	A-loop	-	-	MMSDGeLRTSC	0.3	0.325	0.375	0.564	0.575	0.579	0.632	0.478	0.435	0.557	0.385	4	NA
P54762/D806N	P54762	EPHB1	EPHB1_HUMAN	D806N	587	αF	-	-	FTSASdWSYGI	0.173	0.581	0.246	0.712	0.704	0.316	0.558	0.573	0.68	0.338	0.576	4	NA
P54762/R691W	P54762	EPHB1	EPHB1_HUMAN	R691W	218	β4/β5-loop	-	-	VVTKSrVMIIT	0.346	0.275	0.379	0.502	0.495	0.435	0.486	0.363	0.403	0.548	0.404	4	NA
P54764/D773N	P54764	EPHA4	EPHA4_HUMAN	D773N	499	A-loop	-	-	SRVLEdPEAAY	0.413	0.28	0.307	0.457	0.38	0.416	0.362	0.387	0.356	0.538	0.328	4	NA
P57058/R110Q	P57058	HUNK	HUNK_HUMAN	R110Q	148	αC	-	-	TKNLRrGQIQQ	0.359	0.363	0.278	0.521	0.493	0.487	0.496	0.351	0.445	0.565	0.355	4	NA
P80192/R267H	P80192	MAP3K9	M3K9_HUMAN	R267H	424	Catalytic-loop;HrD-motif	-	-	VPIIHrLKSSN	0.177	0.498	0.325	0.707	0.76	0.462	0.625	0.546	0.725	0.419	0.492	4	NA
Q00537/R312G	Q00537	CDK17	CDK17_HUMAN	R312G	424	Catalytic-loop;HrD-motif	-	-	RKVLHrLKPQN	0.11	0.557	0.333	0.794	0.791	0.462	0.665	0.575	0.786	0.427	0.522	4	NA
Q02763/E990K	Q02763	TEK	TIE2_HUMAN	E990K	504	A-loop	-	-	LSRGQeYVKKT	0.431	0.243	0.326	0.566	0.44	0.54	0.507	0.396	0.371	0.561	0.463	4	NA
Q02763/R1003C	Q02763	TEK	TIE2_HUMAN	R1003C	539	A-loop	-	-	GRLPVrMAIES	0.219	0.406	0.375	0.691	0.67	0.504	0.554	0.459	0.673	0.563	0.463	4	NA
Q06418/R589W	Q06418	TYRO3	TYRO3_HUMAN	R589W	216	β4/β5-loop	-	-	VGVSLrRAKGR	0.622	0.136	0.242	0.334	0.344	0.42	0.372	0.312	0.258	0.608	0.242	4	NA
Q12866/R865Q	Q12866	MERTK	MERTK_HUMAN	R865Q	862	C-term-αI	-	-	SLPDVrQADVI	0.756	0.104	0.14	0.235	0.251	0.428	0.252	0.222	0.215	0.615	0.111	4	NA
Q13188/R178H	Q13188	STK3	STK3_HUMAN	R178H	527	A-loop	-	-	DTMAKrTVIGT	0.201	0.439	0.361	0.686	0.671	0.46	0.599	0.51	0.586	0.45	0.443	4	NA
Q13308/A933V	Q13308	PTK7	PTK7_HUMAN	A933V	429	Catalytic-loop	-	-	HKDLAaNCLVS	0.274	0.355	0.371	0.595	0.578	0.511	0.548	0.399	0.546	0.568	0.445	4	NA
Q13627/R300P	Q13627	DYRK1A	DYR1A_HUMAN	R300P	463	Catalytic-loop	-	-	LCNPKrAIKIV	0.243	0.424	0.333	0.675	0.64	0.464	0.557	0.492	0.644	0.527	0.475	4	NA
Q14289/S571F	Q14289	PTK2B	FAK2_HUMAN	S571F	484	A-loop	p	-	GDFGLsYIEDE	0.123	0.488	0.389	0.862	0.846	0.551	0.795	0.495	0.765	0.544	0.595	4	NA
Q15303/G880E	Q15303	ERBB4	ERBB4_HUMAN	G880E	529	A-loop	-	-	YNADGgMPIKW	0.073	0.387	0.54	0.9	0.885	0.622	0.872	0.485	0.877	0.601	0.506	4	oncogene, TSG
Q15303/R842Q	Q15303	ERBB4	ERBB4_HUMAN	R842Q	424	Catalytic-loop;HrD-motif	-	-	RRLVHrLAARN	0.212	0.479	0.309	0.694	0.658	0.415	0.56	0.506	0.663	0.415	0.433	4	oncogene, TSG
Q15569/V194M	Q15569	TESK1	TESK1_HUMAN	V194M	477	Catalytic-loop	-	-	GFTAVvDFGLA	0.268	0.479	0.253	0.625	0.602	0.443	0.518	0.546	0.62	0.529	0.571	4	NA
Q15831/W308C	Q15831	STK11	STK11_HUMAN	W308C	851	αI	-	loss	IRQHSwRKKHP	0.118	0.621	0.261	0.743	0.747	0.314	0.545	0.64	0.76	0.284	0.539	4	TSG
Q16539/D313N	Q16539	MAPK14	MK14_HUMAN	D313N	857	αI	-	-	FAQYHdDDEPV	0.301	0.211	0.489	0.553	0.55	0.611	0.56	0.336	0.382	0.668	0.457	4	NA
Q16620/D676N	Q16620	NTRK2	NTRK2_HUMAN	D676N	426	Catalytic-loop;HrD-motif	-	-	HFVHRdATRNC	0.043	0.782	0.175	0.914	0.91	0.239	0.642	0.786	0.904	0.175	0.529	4	oncogene, fusion
Q16620/R582H	Q16620	NTRK2	NTRK2_HUMAN	R582H	143	αC	-	-	ASDNArDFHRE	0.417	0.246	0.337	0.371	0.322	0.504	0.362	0.279	0.291	0.655	0.24	4	oncogene, fusion
Q16671/R407Q	Q16671	AMHR2	AMHR2_HUMAN	R407Q	584	αF	-	-	GMALRrDIYSL	0.863	0.039	0.098	0.134	0.138	0.394	0.169	0.136	0.108	0.638	0.088	4	NA
Q16832/P840S	Q16832	DDR2	DDR2_HUMAN	P840S	833	αI	-	-	DTKNRpFQEIH	0.242	0.459	0.298	0.601	0.609	0.362	0.511	0.549	0.583	0.387	0.521	4	oncogene
Q52WX2/E54K	Q52WX2	SBK1	SBK1_HUMAN	E54K	32	β1	-	-	VTKHYeVRELG	0.861	0.053	0.086	0.174	0.163	0.384	0.165	0.187	0.131	0.614	0.139	4	NA
Q59H18/M717I	Q59H18	TNNI3K	TNI3K_HUMAN	M717I	848	αI	-	-	FSEVVmLEECL	0.889	0.053	0.058	0.125	0.117	0.361	0.173	0.158	0.1	0.667	0.138	4	NA
Q5TCX8/S390L	Q5TCX8	MAP3K21	M3K21_HUMAN	S390L	834	αI	-	-	PHIRPsALILE	0.316	0.396	0.288	0.553	0.549	0.426	0.518	0.489	0.506	0.481	0.419	4	NA
Q6P3R8/R230C	Q6P3R8	NEK5	NEK5_HUMAN	R230C	806	αH	-	-	SPGFSrLHSLI	0.747	0.095	0.158	0.203	0.208	0.44	0.268	0.197	0.159	0.679	0.151	4	NA
Q7Z2Y5/G281R	Q7Z2Y5	NRK	NRK_HUMAN	G281R	707	αG/αH-loop	-	-	TVKSSgSRKFH	0.41	0.19	0.4	0.391	0.333	0.509	0.409	0.257	0.277	0.672	0.369	4	NA
Q7Z2Y5/R301C	Q7Z2Y5	NRK	NRK_HUMAN	R301C	832	αH/αI-loop	-	-	KNFLFrTSANM	0.116	0.643	0.241	0.77	0.793	0.325	0.578	0.632	0.803	0.307	0.453	4	NA
Q86UE8/V601E	Q86UE8	TLK2	TLK2_HUMAN	V601E	435	Catalytic-loop	-	-	GNILLvGTACG	0.411	0.159	0.43	0.417	0.301	0.593	0.446	0.224	0.35	0.712	0.285	4	NA
Q86YV6/A251V	Q86YV6	MYLK4	MYLK4_HUMAN	A251V	484	A-loop	-	-	IDFGLaRYKPR	0.16	0.476	0.364	0.736	0.727	0.503	0.61	0.523	0.683	0.504	0.525	4	NA
Q86YV6/S301L	Q86YV6	MYLK4	MYLK4_HUMAN	S301L	608	αF/αG-loop	-	-	LLSGLsFLGDN	0.246	0.353	0.401	0.606	0.607	0.507	0.565	0.477	0.518	0.576	0.49	4	NA
Q8N752/E41K	Q8N752	CSNK1A1L	KC1AL_HUMAN	E41K	87	β2/β3-loop	-	-	TTTNGeVAVKL	0.345	0.332	0.323	0.464	0.417	0.465	0.419	0.373	0.31	0.554	0.284	4	NA
Q8TDC3/R303W	Q8TDC3	BRSK1	BRSK1_HUMAN	R303W	871	C-term-αI	-	-	PAPGRrAMRSL	0.58	0.14	0.281	0.358	0.35	0.491	0.359	0.273	0.316	0.672	0.263	4	NA
Q8WU08/E262K	Q8WU08	STK32A	ST32A_HUMAN	E262K	824	αH/αI-loop	-	-	LKKLLeNPDQR	0.834	0.065	0.1	0.164	0.128	0.396	0.185	0.173	0.125	0.638	0.142	4	NA
Q96GD4/R139C	Q96GD4	AURKB	AURKB_HUMAN	R139C	180	αC/β4-loop	-	-	HPNILrYNYFY	0.102	0.218	0.68	0.761	0.736	0.657	0.78	0.341	0.551	0.702	0.67	4	NA
Q96GD4/S322L	Q96GD4	AURKB	AURKB_HUMAN	S322L	847	αI	-	-	PLAQVsHPWVR	0.812	0.054	0.134	0.136	0.133	0.36	0.265	0.175	0.114	0.687	0.136	4	NA
Q96L34/D233H	Q96L34	MARK4	MARK4_HUMAN	D233H	581	A-loop	-	-	QGKKYdPEVDI	0.189	0.436	0.375	0.637	0.61	0.458	0.542	0.473	0.618	0.477	0.49	4	NA
Q9BXA6/R65W	Q9BXA6	TSSK6	TSSK6_HUMAN	R65W	155	αC/β4-loop	-	-	ELSILrVRHPH	0.307	0.246	0.447	0.525	0.523	0.475	0.561	0.375	0.458	0.54	0.394	4	NA
Q9BXA7/R9Q	Q9BXA7	TSSK1B	TSSK1_HUMAN	R9Q	23	N-term-β1	-	-	AAVLKrGYLLG	0.703	0.16	0.137	0.325	0.293	0.423	0.267	0.262	0.329	0.609	0.12	4	NA
Q9BXA7/S291F	Q9BXA7	TSSK1B	TSSK1_HUMAN	S291F	871	C-term-αI	-	-	KEGESsGTEPL	0.509	0.199	0.292	0.377	0.32	0.517	0.397	0.262	0.256	0.693	0.254	4	NA
Q9BXA7/V204M	Q9BXA7	TSSK1B	TSSK1_HUMAN	V204M	593	αF	-	-	IWSLGvLYIMV	0.326	0.341	0.333	0.477	0.495	0.438	0.442	0.427	0.475	0.481	0.376	4	NA
Q9H1R3/G292R	Q9H1R3	MYLK2	MYLK2_HUMAN	G292R	38	β1;Gly-rich-loop	-	-	SKEALgGKFGA	0.104	0.563	0.334	0.774	0.697	0.4	0.662	0.601	0.733	0.374	0.672	4	NA
Q9H1R3/S460F	Q9H1R3	MYLK2	MYLK2_HUMAN	S460F	582	A-loop	-	-	NYDQIsKTDMW	0.173	0.377	0.449	0.681	0.708	0.54	0.65	0.504	0.637	0.612	0.522	4	NA
Q9H4A3/R461Q	Q9H4A3	WNK1	WNK1_HUMAN	R461Q	824	αH/αI-loop	-	-	IEGCIrNKDER	0.228	0.363	0.409	0.558	0.54	0.453	0.486	0.403	0.498	0.55	0.325	4	NA
Q9NRM7/F770L	Q9NRM7	LATS2	LATS2_HUMAN	F770L	376	αE	-	-	EHLARfIAELT	0.223	0.377	0.399	0.653	0.601	0.495	0.534	0.427	0.558	0.613	0.524	4	TSG
Q9NYV4/R882W	Q9NYV4	CDK12	CDK12_HUMAN	R882W	485	A-loop	-	-	DFGLArYNSEE	0.066	0.566	0.368	0.829	0.852	0.401	0.785	0.64	0.875	0.373	0.52	4	TSG
Q9NYV4/S987F	Q9NYV4	CDK12	CDK12_HUMAN	S987F	799	αG/αH-loop	-	-	LREEFsIPSAA	0.752	0.119	0.129	0.253	0.242	0.344	0.232	0.252	0.164	0.633	0.144	4	TSG
Q9NYY3/A110T	Q9NYY3	PLK2	PLK2_HUMAN	A110T	94	β3	-	-	NKVYAaIIPHS	0.668	0.135	0.196	0.315	0.328	0.436	0.242	0.245	0.27	0.547	0.212	4	NA
Q9P1W9/L116F	Q9P1W9	PIM2	PIM2_HUMAN	L116F	233	β5	-	-	GFMLVlRPLPA	0.631	0.158	0.21	0.515	0.324	0.481	0.308	0.301	0.245	0.62	0.735	4	NA
Q9P286/Q687H	Q9P286	PAK5	PAK5_HUMAN	Q687H	829	αH/αI-loop	-	-	VREPSqATAQE	0.391	0.233	0.376	0.35	0.304	0.49	0.36	0.285	0.261	0.623	0.266	4	NA
Q9P286/S511N	Q9P286	PAK5	PAK5_HUMAN	S511N	184	β4	-	-	VVDMYsYLVGD	0.832	0.071	0.097	0.197	0.168	0.318	0.21	0.205	0.204	0.603	0.118	4	NA
Q9P2K8/T475M	Q9P2K8	EIF2AK4	E2AK4_HUMAN	T475M	579	A-loop	-	-	ALPYKtKKGDV	0.68	0.111	0.208	0.22	0.255	0.436	0.239	0.232	0.234	0.602	0.157	4	NA
Q9UBS0/P267L	Q9UBS0	RPS6KB2	KS6B2_HUMAN	P267L	608	αF/αG-loop	-	-	MLTGSpFTAEN	0.293	0.402	0.305	0.528	0.582	0.404	0.456	0.518	0.572	0.49	0.47	4	NA
Q9UKI8/R562W	Q9UKI8	TLK1	TLK1_HUMAN	R562W	372	αE	-	-	SEKEArIVMQI	0.212	0.335	0.453	0.599	0.65	0.496	0.601	0.427	0.58	0.557	0.423	4	NA
Q9Y6R4/E1390K	Q9Y6R4	MAP3K4	M3K4_HUMAN	E1390K	149	αC	-	-	KETADeKIFEG	0.143	0.646	0.211	0.705	0.709	0.286	0.549	0.659	0.7	0.328	0.488	4	NA
O00444/R267Q	O00444	PLK4	PLK4_HUMAN	R267Q	854	αI	-	-	HPFMSrSSTKS	0.89	0.041	0.069	0.112	0.113	0.409	0.177	0.125	0.083	0.72	0.098	4	NA
O14733/V305I	O14733	MAP2K7	MP2K7_HUMAN	V305I	588	αF	-	-	DIRADvSLGIS	0.794	0.069	0.137	0.187	0.207	0.439	0.176	0.197	0.143	0.591	0.219	4	NA
O15075/S411L	O15075	DCLK1	DCLK1_HUMAN	S411L	76	β2/β3-loop	-	-	ECVERsAREYA	0.589	0.209	0.202	0.263	0.32	0.477	0.294	0.357	0.286	0.558	0.176	4	NA
O15146/G865E	O15146	MUSK	MUSK_HUMAN	G865E	859	C-term-αI	-	-	CERAEgVSV	0.565	0.153	0.282	0.35	0.362	0.551	0.424	0.218	0.245	0.663	0.294	4	NA
O43187/R388W	O43187	IRAK2	IRAK2_HUMAN	R388W	547	A-loop	-	-	PEDFIrGQLTK	0.239	0.352	0.41	0.642	0.591	0.463	0.566	0.428	0.556	0.523	0.424	4	NA
O43318/A73V	O43318	MAP3K7	M3K7_HUMAN	A73V	145	αC	-	-	ESERKaIVELR	0.331	0.236	0.433	0.509	0.383	0.492	0.426	0.282	0.323	0.677	0.303	4	NA
O60674/S1035L	O60674	JAK2	JAK2_HUMAN	S1035L	585	αF	-	-	KFSVAsVWSFG	0.294	0.44	0.265	0.616	0.617	0.395	0.525	0.478	0.511	0.433	0.531	4	oncogene, fusion
O75582/D662Y	O75582	RPS6KA5	KS6A5_HUMAN	D662Y	816	αH	-	-	SQEAKdIQGLL	0.356	0.313	0.332	0.462	0.43	0.463	0.441	0.391	0.451	0.607	0.415	4	NA
O94806/R621H	O94806	PRKD3	KPCD3_HUMAN	R621H	147	αC	-	-	QESQLrEVAIL	0.27	0.345	0.384	0.634	0.61	0.495	0.52	0.453	0.544	0.559	0.413	4	NA
O94921/H361Y	O94921	CDK14	CDK14_HUMAN	H361Y	701	αG/αH-loop	-	-	TWPGVhLPHFK	0.734	0.078	0.187	0.134	0.178	0.497	0.197	0.175	0.12	0.696	0.118	4	NA
O96017/G306R	O96017	CHEK2	CHK2_HUMAN	G306R	239	β5/αD-loop	-	-	LELMEgELFDK	0.198	0.401	0.401	0.633	0.623	0.499	0.617	0.448	0.634	0.572	0.681	4	TSG
P00533/A743T	P00533	EGFR	EGFR_HUMAN	A743T	93	β3	-	-	VKIPVaKELRE	0.348	0.427	0.225	0.512	0.538	0.378	0.429	0.53	0.541	0.413	0.47	4	oncogene
P00533/E734K	P00533	EGFR	EGFR_HUMAN	E734K	73	β2/β3-loop	-	-	GLWIPeEKVKI	0.634	0.141	0.225	0.208	0.21	0.443	0.226	0.234	0.221	0.638	0.176	4	oncogene
P00533/G810D	P00533	EGFR	EGFR_HUMAN	G810D	365	αD/αE-loop	-	-	HKDNIgQYLLN	0.334	0.223	0.442	0.484	0.382	0.54	0.474	0.267	0.334	0.667	0.365	4	oncogene
P00533/G863S	P00533	EGFR	EGFR_HUMAN	G863S	498	A-loop	-	-	LAKLLgEEKEY	0.576	0.112	0.313	0.52	0.38	0.545	0.423	0.222	0.264	0.704	0.463	4	oncogene
P00533/I744V	P00533	EGFR	EGFR_HUMAN	I744V	94	β3	-	-	KIPVAiELREA	0.577	0.133	0.289	0.39	0.368	0.465	0.333	0.26	0.276	0.582	0.26	4	oncogene
P05129/A378T	P05129	PRKCG	KPCG_HUMAN	A378T	93	β3	-	-	SDELYaKILKK	0.295	0.468	0.237	0.562	0.565	0.379	0.514	0.563	0.601	0.418	0.491	4	NA
P05129/S579F	P05129	PRKCG	KPCG_HUMAN	S579F	802	αG/αH-loop	-	-	YPKSLsEAVAI	0.167	0.552	0.281	0.764	0.775	0.447	0.655	0.589	0.724	0.462	0.514	4	NA
P06239/M292I	P06239	LCK	LCK_HUMAN	M292I	154	αC	-	-	AEANLmQLQHQ	0.248	0.365	0.386	0.672	0.585	0.525	0.577	0.412	0.504	0.512	0.655	4	oncogene, fusion
P06493/R275Q	P06493	CDK1	CDK1_HUMAN	R275Q	832	αH/αI-loop	-	-	YDPAKrSGKMA	0.232	0.525	0.243	0.642	0.653	0.306	0.503	0.604	0.655	0.323	0.385	4	NA
P06493/R59H	P06493	CDK1	CDK1_HUMAN	R59H	162	αC/β4-loop	-	-	LLKELrPNIVS	0.702	0.171	0.127	0.37	0.332	0.332	0.264	0.389	0.364	0.423	0.198	4	NA
P07947/R487Q	P07947	YES1	YES_HUMAN	R487Q	661	αG/αH-loop	-	-	LEQVErYRMPC	0.743	0.074	0.184	0.185	0.189	0.554	0.254	0.137	0.124	0.773	0.111	4	NA
P07949/R770Q	P07949	RET	RET_HUMAN	R770Q	144	αC	-	-	SPSELrLLSEF	0.867	0.05	0.083	0.123	0.157	0.387	0.145	0.147	0.121	0.676	0.071	4	oncogene, fusion
P07949/T930M	P07949	RET	RET_HUMAN	T930M	583	αF	-	-	DHIYTtSDVWS	0.257	0.316	0.427	0.578	0.558	0.494	0.554	0.41	0.553	0.549	0.533	4	oncogene, fusion
P08581/E1325K	P08581	MET	MET_HUMAN	E1325K	828	αH/αI-loop	-	-	WHPKAeRPSFS	0.676	0.131	0.193	0.223	0.231	0.438	0.248	0.243	0.211	0.628	0.215	4	oncogene
P08581/R1327C	P08581	MET	MET_HUMAN	R1327C	832	αH/αI-loop	-	-	PKAEMrSFSEL	0.095	0.679	0.226	0.738	0.794	0.29	0.581	0.659	0.798	0.322	0.449	4	oncogene
P08631/E334K	P08631	HCK	HCK_HUMAN	E334K	234	β5	-	-	IYIITeMAKGS	0.123	0.428	0.45	0.714	0.698	0.527	0.667	0.512	0.715	0.501	0.599	4	NA
P09619/R685C	P09619	PDGFRB	PGFRB_HUMAN	R685C	238	β5/αD-loop	-	-	ITEYCrGDLVD	0.549	0.152	0.299	0.398	0.381	0.491	0.398	0.294	0.303	0.649	0.337	4	oncogene, fusion
P0C1S8/E222K	P0C1S8	WEE2	WEE2_HUMAN	E222K	41	Gly-rich-loop;β1/β2-loop	-	-	KIGVGeGTVYK	0.431	0.281	0.288	0.518	0.478	0.462	0.349	0.449	0.478	0.525	0.316	4	NA
P10721/A895T	P10721	KIT	KIT_HUMAN	A895T	762	αG/αH-loop	-	-	LSPEHaAEMYD	0.343	0.291	0.366	0.46	0.417	0.476	0.434	0.308	0.358	0.591	0.335	4	oncogene
P10721/E605K	P10721	KIT	KIT_HUMAN	E605K	48	β2	-	-	FGKVVeTAYGL	0.595	0.136	0.269	0.288	0.308	0.532	0.368	0.221	0.249	0.664	0.276	4	oncogene
P11309/P288L	P11309	PIM1	PIM1_HUMAN	P288L	850	αI	-	-	EIQNHpMQDVL	0.299	0.367	0.333	0.524	0.591	0.478	0.5	0.486	0.507	0.512	0.492	4	oncogene, fusion
P11362/G703S	P11362	FGFR1	FGFR1_HUMAN	G703S	633	αF/αG-loop	-	-	GSPYPgPVEEL	0.35	0.292	0.358	0.455	0.393	0.503	0.458	0.276	0.367	0.632	0.391	4	oncogene, fusion
P11801/R369H	P11801	PSKH1	KPSH1_HUMAN	R369H	866	C-term-αI	-	-	MKNLHrISQNL	0.701	0.165	0.134	0.291	0.329	0.399	0.24	0.215	0.271	0.578	0.099	4	NA
P11802/V174M	P11802	CDK4	CDK4_HUMAN	V174M	530	A-loop	-	-	MALTPvVTLWY	0.336	0.418	0.246	0.633	0.612	0.261	0.472	0.565	0.584	0.309	0.353	4	oncogene
P14616/A963T	P14616	INSRR	INSRR_HUMAN	A963T	14	N-term-β1	-	-	PEYFSaDMYVP	0.806	0.056	0.138	0.173	0.163	0.462	0.215	0.159	0.124	0.68	0.139	4	NA
P16066/R802C	P16066	NPR1	ANPRA_HUMAN	R802C	853	αI	-	-	IRLTLrFNREN	0.281	0.303	0.416	0.578	0.54	0.478	0.566	0.381	0.444	0.543	0.394	4	NA
P16234/G898S	P16234	PDGFRA	PGFRA_HUMAN	G898S	633	αF/αG-loop	-	-	GTPYPgMVDST	0.304	0.301	0.394	0.473	0.427	0.514	0.494	0.308	0.404	0.635	0.421	4	oncogene, fusion
P17612/D221N	P17612	PRKACA	KAPCA_HUMAN	D221N	587	αF	-	-	YNKAVdWALGV	0.158	0.559	0.283	0.712	0.7	0.363	0.574	0.563	0.681	0.364	0.547	4	oncogene
P17948/R812W	P17948	FLT1	VGFR1_HUMAN	R812W	16	N-term-β1	-	-	DEQCErPYDAS	0.265	0.419	0.315	0.603	0.589	0.45	0.49	0.469	0.513	0.536	0.386	4	NA
P17948/V960I	P17948	FLT1	VGFR1_HUMAN	V960I	324	αD/αE-loop	-	-	PRLDSvSSESF	0.893	0.027	0.08	0.095	0.092	0.373	0.142	0.098	0.063	0.727	0.112	4	NA
P19784/R245H	P19784	CSNK2A2	CSK22_HUMAN	R245H	671	αG/αH-loop	-	-	YDQLVrAKVLG	0.371	0.217	0.411	0.404	0.353	0.502	0.408	0.245	0.269	0.661	0.288	4	NA
P21860/R955C	P21860	ERBB3	ERBB3_HUMAN	R955C	832	αH/αI-loop	-	-	IDENIrTFKEL	0.096	0.659	0.245	0.758	0.791	0.326	0.574	0.636	0.8	0.325	0.444	4	oncogene
P22455/V548M	P22455	FGFR4	FGFR4_HUMAN	V548M	231	β5	-	-	EGPLYvVECAA	0.67	0.109	0.221	0.184	0.175	0.463	0.277	0.168	0.17	0.676	0.179	4	oncogene
P22607/A569V	P22607	FGFR3	FGFR3_HUMAN	A569V	255	αD/αE-loop	-	-	REFLRaRPPGL	0.333	0.317	0.35	0.465	0.419	0.472	0.433	0.397	0.395	0.597	0.384	4	oncogene, fusion
P22607/R640W	P22607	FGFR3	FGFR3_HUMAN	R640W	485	A-loop	-	-	DFGLArVHNLD	0.064	0.519	0.417	0.839	0.838	0.494	0.777	0.589	0.884	0.461	0.537	4	oncogene, fusion
P22612/A305T	P22612	PRKACG	KAPCG_HUMAN	A305T	859	C-term-αI	-	-	TTSWIaYEKKV	0.56	0.168	0.272	0.42	0.31	0.499	0.345	0.245	0.23	0.618	0.268	4	NA
P25092/G559R	P25092	GUCY2C	GUC2C_HUMAN	G559R	231	β5	-	-	DTMIFgIEYCE	0.404	0.209	0.388	0.464	0.351	0.477	0.444	0.31	0.313	0.66	0.355	4	NA
P27037/E214K	P27037	ACVR2A	AVR2A_HUMAN	E214K	87	β2/β3-loop	-	-	AQLLNeVAVKI	0.595	0.164	0.241	0.3	0.271	0.471	0.279	0.301	0.238	0.582	0.255	4	TSG
P27361/H158L	P27361	MAPK3	MK03_HUMAN	H158L	393	αE	-	-	GLKYIhANVLH	0.126	0.636	0.239	0.719	0.723	0.331	0.616	0.631	0.7	0.284	0.497	4	NA
P29320/D715Y	P29320	EPHA3	EPHA3_HUMAN	D715Y	355	αD/αE-loop	-	-	FLRKHdQFTVI	0.248	0.319	0.433	0.586	0.598	0.526	0.507	0.409	0.539	0.597	0.506	4	inconclusive
P29320/G766R	P29320	EPHA3	EPHA3_HUMAN	G766R	481	A-loop;DFG-motif	-	-	KVSDFgSRVLE	0.115	0.418	0.467	0.832	0.852	0.496	0.753	0.551	0.776	0.531	0.648	4	inconclusive
P29320/G840S	P29320	EPHA3	EPHA3_HUMAN	G840S	662	αG/αH-loop	-	-	KAVDEgRLPPP	0.289	0.409	0.302	0.552	0.573	0.486	0.469	0.454	0.494	0.524	0.434	4	inconclusive
P29323/P643S	P29323	EPHB2	EPHB2_HUMAN	P643S	74	β2/β3-loop	-	-	GHLKLpKREIF	0.298	0.318	0.383	0.56	0.562	0.48	0.51	0.433	0.544	0.569	0.449	4	NA
P30530/G517S	P30530	AXL	UFO_HUMAN	G517S	11	N-term-β1	-	-	TLNSLgSEELK	0.381	0.254	0.365	0.489	0.395	0.5	0.438	0.358	0.417	0.655	0.338	4	NA
P30530/T568M	P30530	AXL	UFO_HUMAN	T568M	97	β3	-	-	KVAVKtKIAIC	0.31	0.303	0.387	0.562	0.52	0.459	0.498	0.44	0.486	0.581	0.452	4	NA
P30530/V753M	P30530	AXL	UFO_HUMAN	V753M	634	αF/αG-loop	-	-	TPYPGvNSEIY	0.416	0.221	0.363	0.437	0.388	0.529	0.41	0.271	0.293	0.658	0.343	4	NA
P31152/R64Q	P31152	MAPK4	MK04_HUMAN	R64Q	148	αC	-	-	MKHALrIKIIR	0.14	0.529	0.33	0.714	0.694	0.466	0.626	0.529	0.676	0.474	0.526	4	NA
P31751/R371C	P31751	AKT2	AKT2_HUMAN	R371C	701	αG/αH-loop	-	-	EIRFPrLSPEA	0.309	0.333	0.359	0.564	0.52	0.433	0.482	0.435	0.456	0.523	0.356	4	oncogene
P34947/R304H	P34947	GRK5	GRK5_HUMAN	R304H	402	Catalytic-loop	-	neutral	LEDLHrNTVYR	0.733	0.11	0.157	0.186	0.162	0.375	0.195	0.159	0.13	0.618	0.155	4	NA
P35590/R1091W	P35590	TIE1	TIE1_HUMAN	R1091W	824	αH/αI-loop	-	-	MRQCWrRPYER	0.275	0.383	0.343	0.563	0.532	0.421	0.487	0.427	0.461	0.541	0.386	4	NA
P35590/R958H	P35590	TIE1	TIE1_HUMAN	R958H	376	αE	-	-	SRQLLrASDAA	0.736	0.117	0.147	0.196	0.185	0.442	0.221	0.183	0.113	0.661	0.177	4	NA
P35968/R1022Q	P35968	KDR	VGFR2_HUMAN	R1022Q	405	Catalytic-loop	-	-	EFLASrCIHRD	0.344	0.26	0.396	0.505	0.514	0.473	0.482	0.377	0.436	0.553	0.31	4	oncogene
P35968/R842C	P35968	KDR	VGFR2_HUMAN	R842C	39	β1;Gly-rich-loop	-	-	GKPLGrAFGQV	0.194	0.499	0.306	0.763	0.763	0.441	0.622	0.539	0.705	0.43	0.517	4	oncogene
P36888/D839N	P36888	FLT3	FLT3_HUMAN	D839N	503	A-loop	-	-	RDIMSdNYVVR	0.581	0.133	0.286	0.416	0.38	0.523	0.488	0.229	0.276	0.63	0.489	4	oncogene
P36888/G617E	P36888	FLT3	FLT3_HUMAN	G617E	38	β1;Gly-rich-loop	-	-	FGKVLgGAFGK	0.1	0.506	0.395	0.843	0.786	0.47	0.689	0.573	0.766	0.537	0.676	4	oncogene
P36888/S618L	P36888	FLT3	FLT3_HUMAN	S618L	39	β1;Gly-rich-loop	-	-	GKVLGsAFGKV	0.202	0.493	0.304	0.751	0.753	0.422	0.577	0.554	0.738	0.413	0.623	4	oncogene
P36896/R415Q	P36896	ACVR1B	ACV1B_HUMAN	R415Q	601	αF	-	-	YWEIArCNSGG	0.276	0.305	0.419	0.617	0.562	0.542	0.554	0.355	0.478	0.606	0.41	4	TSG
P37023/M438I	P37023	ACVRL1	ACVL1_HUMAN	M438I	634	αF/αG-loop	-	-	PSFEDmKVVCV	0.195	0.462	0.343	0.657	0.634	0.451	0.562	0.504	0.643	0.457	0.495	4	NA
P37173/R537H	P37173	TGFBR2	TGFR2_HUMAN	R537H	851	αI	-	-	QCVAErSELEH	0.275	0.396	0.329	0.607	0.569	0.427	0.451	0.46	0.514	0.466	0.387	4	TSG
P41743/R278C	P41743	PRKCI	KPCI_HUMAN	R278C	87	β2/β3-loop	-	-	LKKTDrYAMKV	0.198	0.385	0.418	0.64	0.675	0.521	0.608	0.481	0.609	0.473	0.452	4	NA
P42679/S218L	P42679	MATK	MATK_HUMAN	S218L	14	N-term-β1	-	-	KHGTKsEEELA	0.563	0.166	0.27	0.312	0.243	0.517	0.338	0.27	0.251	0.676	0.25	4	NA
P42681/E458K	P42681	TXK	TXK_HUMAN	E458K	597	αF	-	-	GVLMWeFTEGK	0.144	0.568	0.288	0.701	0.701	0.389	0.58	0.591	0.739	0.432	0.551	4	NA
P43403/E509K	P43403	ZAP70	ZAP70_HUMAN	E509K	544	A-loop;APE-motif	-	-	KWYAPeINFRK	0.078	0.762	0.16	0.82	0.841	0.201	0.589	0.794	0.869	0.218	0.523	4	NA
P43403/V314M	P43403	ZAP70	ZAP70_HUMAN	V314M	3	N-term-β1	-	-	PMDTSvESPYS	0.507	0.148	0.346	0.396	0.361	0.652	0.447	0.191	0.255	0.737	0.294	4	NA
P43405/E362K	P43405	SYK	KSYK_HUMAN	E362K	19	N-term-β1	-	-	EIRPKeYLDRK	0.787	0.101	0.112	0.254	0.227	0.445	0.233	0.199	0.275	0.674	0.222	4	oncogene, fusion
P45985/D289N	P45985	MAP2K4	MP2K4_HUMAN	D289N	587	αF	-	-	YDVRSdWSLGI	0.153	0.621	0.226	0.71	0.7	0.297	0.55	0.594	0.671	0.31	0.546	4	oncogene, TSG
P46734/D110N	P46734	MAP2K3	MP2K3_HUMAN	D110N	149	αC	-	-	KRLLMdDINMR	0.318	0.407	0.276	0.586	0.578	0.444	0.467	0.479	0.546	0.51	0.437	4	NA
P49137/G171S	P49137	MAPKAPK2	MAPK2_HUMAN	G171S	382	αE	-	-	IMKSIgAIQYL	0.333	0.27	0.397	0.496	0.44	0.507	0.448	0.365	0.435	0.636	0.401	4	NA
P49674/P66L	P49674	CSNK1E	KC1E_HUMAN	P66L	179	αC/β4-loop	-	-	GGVGIpIKWCG	0.36	0.375	0.265	0.519	0.517	0.344	0.485	0.512	0.501	0.34	0.491	4	NA
P49674/R98H	P49674	CSNK1E	KC1E_HUMAN	R98H	357	αD/αE-loop	-	-	FNFCSrFSLKT	0.18	0.472	0.348	0.735	0.676	0.435	0.602	0.512	0.625	0.515	0.411	4	NA
P49840/R113C	P49840	GSK3A	GSK3A_HUMAN	R113C	25	N-term-β1	-	-	GQGPErQEVAY	0.308	0.263	0.43	0.575	0.515	0.52	0.527	0.399	0.462	0.533	0.346	4	NA
P51841/E596K	P51841	GUCY2F	GUC2F_HUMAN	E596K	151	αC	-	-	ASDVFeMKDLR	0.827	0.059	0.114	0.193	0.248	0.412	0.177	0.254	0.164	0.603	0.191	4	NA
P52333/R870Q	P52333	JAK3	JAK3_HUMAN	R870Q	148	αC	-	-	QRDFQrIQILK	0.31	0.38	0.31	0.514	0.431	0.494	0.483	0.331	0.353	0.602	0.346	4	oncogene
P53778/D272N	P53778	MAPK12	MK12_HUMAN	D272N	793	αG/αH-loop	-	-	ELEKKdASILT	0.655	0.118	0.227	0.193	0.15	0.476	0.227	0.192	0.169	0.675	0.163	4	NA
P53779/A81V	P53779	MAPK10	MK10_HUMAN	A81V	51	β2	-	-	GIVCAaDAVLD	0.254	0.364	0.382	0.545	0.513	0.446	0.508	0.421	0.51	0.542	0.5	4	NA
P54762/A669V	P54762	EPHB1	EPHB1_HUMAN	A669V	150	αC	-	-	DFLSEaIMGQF	0.239	0.365	0.396	0.581	0.593	0.494	0.507	0.427	0.544	0.577	0.461	4	NA
P54762/N749K	P54762	EPHB1	EPHB1_HUMAN	N749K	431	Catalytic-loop	-	-	DLAARnLVNSN	0.07	0.7	0.23	0.825	0.854	0.263	0.674	0.712	0.85	0.354	0.606	4	NA
P54762/R865Q	P54762	EPHB1	EPHB1_HUMAN	R865Q	827	αH/αI-loop	-	-	CWQKDrSRPRF	0.292	0.271	0.437	0.571	0.499	0.571	0.49	0.343	0.4	0.69	0.357	4	NA
P54762/R870Q	P54762	EPHB1	EPHB1_HUMAN	R870Q	834	αI	-	-	RNSRPrAEIVN	0.782	0.128	0.09	0.166	0.198	0.424	0.188	0.256	0.166	0.629	0.091	4	NA
P54762/V718M	P54762	EPHB1	EPHB1_HUMAN	V718M	366	αE	-	-	DGQFTvQLVGM	0.671	0.106	0.223	0.269	0.247	0.581	0.323	0.172	0.166	0.754	0.189	4	NA
P57058/T260M	P57058	HUNK	HUNK_HUMAN	T260M	606	αF/αG-loop	-	-	AMLTGtPFTVE	0.384	0.211	0.405	0.385	0.364	0.539	0.417	0.295	0.358	0.617	0.271	4	NA
P57059/D142N	P57059	SIK1	SIK1_HUMAN	D142N	402	Catalytic-loop	-	-	VEYCHdHIVHR	0.904	0.022	0.075	0.101	0.101	0.279	0.117	0.12	0.095	0.627	0.137	4	NA
P57059/P263L	P57059	SIK1	SIK1_HUMAN	P263L	827	αH/αI-loop	-	-	MLVVDpRRITI	0.271	0.443	0.286	0.534	0.558	0.376	0.493	0.549	0.516	0.425	0.482	4	NA
P78368/R25W	P78368	CSNK1G2	KC1G2_HUMAN	R25W	9	N-term-β1	-	-	KAGGGrSHGIR	0.258	0.388	0.354	0.648	0.647	0.475	0.567	0.479	0.563	0.536	0.496	4	NA
P78368/R272H	P78368	CSNK1G2	KC1G2_HUMAN	R272H	862	C-term-αI	-	-	IGDTKrTPIEV	0.237	0.39	0.373	0.595	0.569	0.511	0.558	0.474	0.53	0.549	0.376	4	NA
Q01974/D615N	Q01974	ROR2	ROR2_HUMAN	D615N	426	Catalytic-loop;HrD-motif	-	-	HVVHKdATRNV	0.024	0.913	0.063	0.939	0.97	0.163	0.649	0.878	0.946	0.118	0.548	4	NA
Q01974/G494S	Q01974	ROR2	ROR2_HUMAN	G494S	60	β2/β3-loop	-	-	KGHLFgAPGEQ	0.64	0.145	0.215	0.242	0.215	0.458	0.258	0.25	0.238	0.671	0.255	4	NA
Q01974/S447L	Q01974	ROR2	ROR2_HUMAN	S447L	4	N-term-β1	p	-	RQLMAsSQDME	0.356	0.355	0.289	0.527	0.559	0.503	0.55	0.388	0.471	0.537	0.283	4	NA
Q02750/G176S	Q02750	MAP2K1	MP2K1_HUMAN	G176S	384	αE	-	-	IAVIKgTYLRE	0.196	0.526	0.278	0.719	0.688	0.445	0.591	0.564	0.647	0.412	0.553	4	oncogene
Q02846/G557R	Q02846	GUCY2D	GUC2D_HUMAN	G557R	11	N-term-β1	-	-	IGVYEgRVWLK	0.269	0.354	0.378	0.55	0.549	0.494	0.53	0.423	0.523	0.586	0.539	4	NA
Q04759/A481V	Q04759	PRKCQ	KPCT_HUMAN	A481V	371	αE	-	-	FDLSRaFYAAE	0.389	0.253	0.358	0.341	0.345	0.486	0.392	0.345	0.262	0.633	0.309	4	NA
Q04759/R629C	Q04759	PRKCQ	KPCT_HUMAN	R629C	847	αI	-	-	VRGDIrHPLFR	0.324	0.268	0.407	0.525	0.526	0.52	0.557	0.393	0.449	0.612	0.378	4	NA
Q06187/E605K	Q06187	BTK	BTK_HUMAN	E605K	642	αG	-	-	RFTNSeAEHIA	0.385	0.323	0.293	0.43	0.413	0.47	0.389	0.37	0.343	0.574	0.291	4	oncogene, TSG
Q13163/S380L	Q13163	MAP2K5	MP2K5_HUMAN	S380L	691	αG/αH-loop	-	-	IVDEDsVLPVG	0.362	0.226	0.412	0.427	0.357	0.565	0.453	0.272	0.304	0.674	0.249	4	NA
Q13464/T347M	Q13464	ROCK1	ROCK1_HUMAN	T347M	861	C-term-αI	-	-	QWAWEtRDTVA	0.479	0.278	0.243	0.46	0.452	0.459	0.431	0.41	0.476	0.608	0.249	4	NA
Q13627/L261R	Q13627	DYRK1A	DYR1A_HUMAN	L261R	370	αE	-	-	GVSLNlRKFAQ	0.299	0.297	0.404	0.535	0.461	0.487	0.494	0.371	0.453	0.58	0.495	4	NA
Q13976/T386M	Q13976	PRKG1	KGP1_HUMAN	T386M	91	β3	-	-	SEESKtAMKIL	0.466	0.255	0.28	0.441	0.402	0.493	0.392	0.37	0.384	0.514	0.293	4	NA
Q14164/R47W	Q14164	IKBKE	IKKE_HUMAN	R47W	119	αC	-	-	TTSYLrREVQV	0.187	0.427	0.386	0.647	0.692	0.453	0.585	0.474	0.644	0.494	0.424	4	NA
Q15303/D861N	Q15303	ERBB4	ERBB4_HUMAN	D861N	479	A-loop;DFG-motif	-	-	HVKITdGLARL	0.032	0.906	0.062	0.94	0.903	0.123	0.58	0.898	0.874	0.114	0.569	4	oncogene, TSG
Q15303/G741E	Q15303	ERBB4	ERBB4_HUMAN	G741E	74	β2/β3-loop	-	-	IWVPEgTVKIP	0.205	0.377	0.418	0.613	0.61	0.56	0.565	0.439	0.574	0.61	0.527	4	oncogene, TSG
Q15303/L710R	Q15303	ERBB4	ERBB4_HUMAN	L710R	22	N-term-β1	-	-	PNQAQlILKET	0.201	0.505	0.293	0.735	0.734	0.42	0.607	0.613	0.674	0.405	0.587	4	oncogene, TSG
Q15303/L798P	Q15303	ERBB4	ERBB4_HUMAN	L798P	235	β5/αD-loop	-	-	QLVTQlPHGCL	0.196	0.453	0.351	0.84	0.701	0.534	0.619	0.521	0.604	0.542	0.902	4	oncogene, TSG
Q15303/S774R	Q15303	ERBB4	ERBB4_HUMAN	S774R	156	αC/β4-loop	-	-	ALIMAsDHPHL	0.333	0.305	0.362	0.497	0.515	0.555	0.45	0.286	0.363	0.709	0.378	4	oncogene, TSG
Q15303/S975L	Q15303	ERBB4	ERBB4_HUMAN	S975L	852	αI	-	-	LAAEFsMARDP	0.435	0.202	0.363	0.322	0.312	0.545	0.453	0.288	0.27	0.668	0.287	4	oncogene, TSG
Q15375/E806K	Q15375	EPHA7	EPHA7_HUMAN	E806K	544	A-loop;APE-motif	-	-	RWTAPeIQYRK	0.21	0.589	0.201	0.663	0.686	0.245	0.473	0.648	0.701	0.294	0.405	4	inconclusive
Q15375/M746I	Q15375	EPHA7	EPHA7_HUMAN	M746I	385	αE	-	-	GIAAGmYLADM	0.288	0.391	0.321	0.533	0.499	0.459	0.522	0.458	0.516	0.496	0.42	4	inconclusive
Q15418/P682S	Q15418	RPS6KA1	KS6A1_HUMAN	P682S	859	C-term-αI	-	-	QKDKLpSQLSH	0.301	0.278	0.421	0.619	0.578	0.572	0.551	0.43	0.518	0.585	0.474	4	NA
Q15746/D1691N	Q15746	MYLK	MYLK_HUMAN	D1691N	812	αH	-	-	DEISDdKDFIS	0.805	0.079	0.116	0.149	0.192	0.432	0.215	0.155	0.193	0.637	0.202	4	NA
Q15831/G251V	Q15831	STK11	STK11_HUMAN	G251V	604	αF/αG-loop	-	-	YNITTgYPFEG	0.208	0.447	0.344	0.685	0.708	0.478	0.611	0.48	0.639	0.536	0.53	4	TSG
Q15835/V251M	Q15835	GRK1	GRK1_HUMAN	V251M	179	αC/β4-loop	-	-	HSRFIvLAYAF	0.293	0.309	0.398	0.477	0.449	0.533	0.492	0.343	0.421	0.603	0.495	4	NA
Q16288/E778K	Q16288	NTRK3	NTRK3_HUMAN	E778K	642	αG	-	-	QLSNTeIECIT	0.44	0.332	0.228	0.458	0.446	0.394	0.344	0.394	0.392	0.503	0.285	4	oncogene, fusion
Q16671/R265Q	Q16671	AMHR2	AMHR2_HUMAN	R265Q	188	β4/β5-loop	-	-	FITASrGPGRL	0.907	0.025	0.069	0.1	0.141	0.407	0.15	0.114	0.074	0.717	0.091	4	NA
Q2M2I8/R141H	Q2M2I8	AAK1	AAK1_HUMAN	R141H	355	αD/αE-loop	-	-	NLMNQrQTGFT	0.366	0.234	0.4	0.394	0.346	0.488	0.342	0.242	0.271	0.637	0.201	4	NA
Q59H18/E711K	Q59H18	TNNI3K	TNI3K_HUMAN	E711K	834	αI	-	-	PEGRPeSEVVM	0.621	0.177	0.202	0.293	0.312	0.45	0.287	0.28	0.288	0.63	0.266	4	NA
Q5MAI5/V106I	Q5MAI5	CDKL4	CDKL4_HUMAN	V106I	377	αE	-	-	GVIKSvWQTLQ	0.863	0.034	0.103	0.129	0.106	0.358	0.155	0.15	0.096	0.677	0.137	4	NA
Q5TCX8/A293V	Q5TCX8	MAP3K21	M3K21_HUMAN	A293V	484	A-loop	-	-	TDFGLaEWHRT	0.206	0.433	0.361	0.712	0.701	0.542	0.626	0.467	0.642	0.547	0.604	4	NA
Q5VT25/R352W	Q5VT25	CDC42BPA	MRCKA_HUMAN	R352W	861	C-term-αI	-	-	DWDNIrCEAPY	0.176	0.428	0.396	0.722	0.718	0.568	0.677	0.469	0.654	0.592	0.473	4	NA
Q6P3R8/W188S	Q6P3R8	NEK5	NEK5_HUMAN	W188S	589	αF	-	-	NKTDIwLGCVL	0.092	0.681	0.227	0.779	0.703	0.294	0.568	0.674	0.756	0.3	0.611	4	NA
Q86Z02/R328C	Q86Z02	HIPK1	HIPK1_HUMAN	R328C	465	Catalytic-loop	-	-	LVDPVrPYRVK	0.171	0.449	0.38	0.667	0.638	0.463	0.569	0.521	0.668	0.453	0.463	4	NA
Q8IW41/R64C	Q8IW41	MAPKAPK5	MAPK5_HUMAN	R64C	151	αC	-	-	ARNEVrHMMCA	0.331	0.252	0.417	0.596	0.542	0.48	0.538	0.334	0.438	0.628	0.382	4	NA
Q8IY84/E138K	Q8IY84	NIM1K	NIM1_HUMAN	E138K	184	β4	-	-	IIRLYeVETLS	0.225	0.334	0.441	0.641	0.56	0.455	0.529	0.436	0.59	0.483	0.438	4	NA
Q8IY84/R135C	Q8IY84	NIM1K	NIM1_HUMAN	R135C	180	αC/β4-loop	-	-	HPNIIrYEVVE	0.096	0.308	0.597	0.805	0.797	0.649	0.813	0.406	0.706	0.651	0.696	4	NA
Q8NB16/D296N	Q8NB16	MLKL	MLKL_HUMAN	D296N	254	αD	-	-	LRELLdEKDLT	0.794	0.045	0.162	0.144	0.153	0.511	0.21	0.138	0.117	0.692	0.175	4	NA
Q8NER5/R403W	Q8NER5	ACVR1C	ACV1C_HUMAN	R403W	601	αF	-	-	YWEIArCSVGG	0.301	0.264	0.435	0.635	0.505	0.463	0.545	0.384	0.433	0.588	0.362	4	NA
Q8TDC3/R302H	Q8TDC3	BRSK1	BRSK1_HUMAN	R302H	870	C-term-αI	-	-	EPAPGrVAMRS	0.405	0.229	0.366	0.41	0.345	0.526	0.428	0.292	0.293	0.677	0.274	4	NA
Q8WU08/E120K	Q8WU08	STK32A	ST32A_HUMAN	E120K	366	αE	-	-	NVHFKeTVKLF	0.167	0.304	0.529	0.719	0.662	0.593	0.689	0.448	0.62	0.641	0.534	4	NA
Q92918/E207K	Q92918	MAP4K1	M4K1_HUMAN	E207K	597	αF	-	-	GITAIeAELQP	0.127	0.583	0.291	0.692	0.694	0.362	0.558	0.601	0.746	0.394	0.556	4	NA
Q92918/R169H	Q92918	MAP4K1	M4K1_HUMAN	R169H	527	A-loop	-	-	ATLARrSFIGT	0.182	0.447	0.372	0.712	0.694	0.466	0.622	0.537	0.638	0.445	0.494	4	NA
Q96GD4/R70Q	Q96GD4	AURKB	AURKB_HUMAN	R70Q	24	N-term-β1	-	-	PDILTrFTIDD	0.602	0.191	0.207	0.35	0.289	0.503	0.338	0.243	0.239	0.615	0.15	4	NA
Q96PF2/D247N	Q96PF2	TSSK2	TSSK2_HUMAN	D247N	816	αH	-	-	TCECKdIYRML	0.867	0.053	0.081	0.141	0.131	0.386	0.169	0.143	0.112	0.658	0.175	4	NA
Q96PF2/R85W	Q96PF2	TSSK2	TSSK2_HUMAN	R85W	219	β4/β5-loop	-	-	ETSDGrYIIME	0.33	0.206	0.464	0.411	0.431	0.529	0.471	0.304	0.382	0.652	0.272	4	NA
Q99570/R296H	Q99570	PIK3R4	PI3R4_HUMAN	R296H	825	αH/αI-loop	-	-	TQMIHrPDKRL	0.448	0.245	0.307	0.361	0.316	0.417	0.357	0.273	0.282	0.631	0.258	4	NA
Q9BWU1/R237C	Q9BWU1	CDK19	CDK19_HUMAN	R237C	634	αF/αG-loop	-	-	PIFHCrEDIKT	0.272	0.375	0.353	0.573	0.536	0.44	0.532	0.431	0.476	0.521	0.375	4	NA
Q9BXA7/A93T	Q9BXA7	TSSK1B	TSSK1_HUMAN	A93T	237	β5/αD-loop	-	-	IVMELaQGDLL	0.583	0.159	0.258	0.323	0.247	0.43	0.256	0.2	0.248	0.679	0.252	4	NA
Q9BXA7/D129N	Q9BXA7	TSSK1B	TSSK1_HUMAN	D129N	402	Catalytic-loop	-	-	IKYCHdDVVHR	0.739	0.105	0.156	0.162	0.173	0.411	0.225	0.181	0.151	0.619	0.178	4	NA
Q9C098/V520I	Q9C098	DCLK3	DCLK3_HUMAN	V520I	541	A-loop	-	-	GTPTYvPEILS	0.798	0.063	0.139	0.148	0.155	0.485	0.21	0.184	0.138	0.714	0.17	4	NA
Q9HC98/E239K	Q9HC98	NEK6	NEK6_HUMAN	E239K	597	αF	-	-	GCLLYeAALQS	0.17	0.455	0.376	0.637	0.619	0.428	0.539	0.51	0.668	0.497	0.48	4	NA
Q9NRP7/R120H	Q9NRP7	STK36	STK36_HUMAN	R120H	406	Catalytic-loop	-	-	YLHSHrLHRDM	0.359	0.278	0.363	0.472	0.446	0.466	0.43	0.379	0.369	0.495	0.328	4	NA
Q9NY57/A215T	Q9NY57	STK32B	ST32B_HUMAN	A215T	595	αF	-	-	SLGITaELLRG	0.373	0.266	0.36	0.369	0.363	0.459	0.395	0.346	0.352	0.612	0.317	4	NA
Q9NYV4/R708C	Q9NYV4	CDK12	CDK12_HUMAN	R708C	10	N-term-β1	-	-	KICCPrGERRQ	0.254	0.356	0.389	0.64	0.622	0.553	0.612	0.442	0.557	0.609	0.392	4	TSG
Q9NZJ5/S1098L	Q9NZJ5	EIF2AK3	E2AK3_HUMAN	S1098L	875	C-term-αI	-	-	RSLSSsTKHSR	0.308	0.281	0.411	0.627	0.553	0.529	0.577	0.388	0.477	0.665	0.462	4	NA
Q9P286/A434V	Q9P286	PAK5	PAK5_HUMAN	A434V	11	N-term-β1	-	-	HEQFRaLQLVV	0.33	0.241	0.43	0.498	0.437	0.494	0.457	0.337	0.392	0.635	0.401	4	NA
Q9P286/D500N	Q9P286	PAK5	PAK5_HUMAN	D500N	156	αC/β4-loop	-	-	VVIMRdHHDNV	0.271	0.302	0.427	0.508	0.517	0.58	0.524	0.309	0.373	0.691	0.512	4	NA
Q9P286/P607L	Q9P286	PAK5	PAK5_HUMAN	P607L	538	A-loop	-	-	SLVGTpWMAPE	0.315	0.424	0.261	0.616	0.621	0.4	0.545	0.511	0.596	0.472	0.525	4	NA
Q9UKI8/F527L	Q9UKI8	TLK1	TLK1_HUMAN	F527L	187	β4/β5-loop	-	-	KLYDYfLDTDT	0.2	0.331	0.47	0.675	0.626	0.602	0.647	0.431	0.588	0.668	0.541	4	NA
Q9UM73/E1409D	Q9UM73	ALK	ALK_HUMAN	E1409D	877	C-term-αI	-	-	LVEEEeVPVRP	0.805	0.07	0.125	0.168	0.165	0.482	0.237	0.124	0.128	0.711	0.226	4	oncogene, fusion
Q9UM73/P1398L	Q9UM73	ALK	ALK_HUMAN	P1398L	866	C-term-αI	-	-	INTALpEYGPL	0.215	0.442	0.343	0.638	0.665	0.46	0.536	0.512	0.643	0.49	0.504	4	oncogene, fusion
Q9UQM7/R186W	Q9UQM7	CAMK2A	KCC2A_HUMAN	R186W	575	A-loop	-	-	SPEVLrDPYGK	0.251	0.387	0.362	0.598	0.585	0.44	0.544	0.444	0.534	0.501	0.398	4	NA
Q9Y243/E352D	Q9Y243	AKT3	AKT3_HUMAN	E352D	639	αG	-	-	YNQDHeLFELI	0.593	0.189	0.218	0.223	0.242	0.468	0.247	0.248	0.203	0.564	0.17	4	oncogene
Q9Y463/P443L	Q9Y463	DYRK1B	DYR1B_HUMAN	P443L	864	C-term-αI	-	-	ATNTGpGSSAS	0.349	0.228	0.423	0.464	0.441	0.516	0.458	0.355	0.388	0.642	0.385	4	NA
Q9Y4K4/A301T	Q9Y4K4	MAP4K5	M4K5_HUMAN	A301T	876	C-term-αI	-	-	NPDNHaYTEAD	0.846	0.06	0.094	0.187	0.191	0.386	0.162	0.193	0.177	0.644	0.111	4	NA
P11362/R570L	P11362	FGFR1	FGFR1_HUMAN	R570L	250	αD	-	-	SKGNLrYLQAR	0.237	0.328	0.435	0.583	0.538	0.483	0.505	0.394	0.486	0.568	0.421	3	oncogene, fusion
P21802/E768K	P21802	FGFR2	FGFR2_HUMAN	E768K	861	C-term-αI	-	-	LTTNEeLDLSQ	0.466	0.271	0.264	0.487	0.501	0.541	0.484	0.386	0.495	0.64	0.322	3	oncogene, fusion
O00141/A71V	O00141	SGK1	SGK1_HUMAN	A71V	4	N-term-β1	-	-	PELMNaPSPPP	0.661	0.152	0.187	0.25	0.276	0.47	0.25	0.28	0.174	0.605	0.238	3	oncogene
O00238/D297E	O00238	BMPR1B	BMR1B_HUMAN	D297E	365	αD/αE-loop	-	-	KSTTLdKSMLK	0.435	0.214	0.351	0.327	0.276	0.504	0.338	0.238	0.261	0.669	0.333	3	NA
O14733/R382H	O14733	MAP2K7	MP2K7_HUMAN	R382H	854	αI	-	-	HSFIKrETLEV	0.482	0.192	0.326	0.339	0.254	0.481	0.31	0.213	0.191	0.695	0.227	3	NA
O14920/A270V	O14920	IKBKB	IKKB_HUMAN	A270V	802	αG/αH-loop	-	-	LNSVLaRLEKW	0.817	0.075	0.108	0.206	0.223	0.392	0.201	0.179	0.223	0.653	0.105	3	oncogene
O14920/K171T	O14920	IKBKB	IKKB_HUMAN	K171T	485	A-loop	ub	-	DLGYAkLDQGS	0.082	0.386	0.531	0.83	0.843	0.558	0.863	0.509	0.873	0.55	0.499	3	oncogene
O14936/E92K	O14936	CASK	CSKP_HUMAN	E92K	234	β5	-	-	LYMVFeMDGAD	0.376	0.246	0.378	0.452	0.385	0.499	0.431	0.276	0.33	0.593	0.388	3	NA
O14965/A385T	O14965	AURKA	AURKA_HUMAN	A385T	854	αI	-	-	HPWITaSSKPS	0.903	0.031	0.066	0.111	0.099	0.354	0.142	0.109	0.074	0.703	0.116	3	NA
O14965/G173E	O14965	AURKA	AURKA_HUMAN	G173E	121	αC	-	-	QLEKAgEHQLR	0.592	0.126	0.282	0.243	0.253	0.535	0.301	0.21	0.249	0.706	0.217	3	NA
O14965/K396E	O14965	AURKA	AURKA_HUMAN	K396E	865	C-term-αI	-	-	SNCQNkSASKQ	0.664	0.082	0.254	0.219	0.258	0.5	0.301	0.21	0.175	0.688	0.186	3	NA
O14965/Y246H	O14965	AURKA	AURKA_HUMAN	Y246H	390	αE	-	-	ANALSyHSKRV	0.239	0.35	0.41	0.648	0.584	0.462	0.554	0.482	0.563	0.541	0.458	3	NA
O15075/T550I	O15075	DCLK1	DCLK1_HUMAN	T550I	536	A-loop	-	-	YTVCGtTYVAP	0.213	0.584	0.203	0.603	0.626	0.265	0.528	0.636	0.759	0.284	0.426	3	NA
O15146/S840N	O15146	MUSK	MUSK_HUMAN	S840N	824	αH/αI-loop	-	-	MRLCWsLPADR	0.803	0.066	0.13	0.145	0.163	0.361	0.174	0.18	0.131	0.642	0.125	3	NA
O15264/P306L	O15264	MAPK13	MK13_HUMAN	P306L	850	αI	-	-	QALTHpFEPFR	0.28	0.395	0.325	0.56	0.602	0.425	0.521	0.506	0.577	0.448	0.5	3	NA
O43283/M233V	O43283	MAP3K13	M3K13_HUMAN	M233V	233	β5	-	-	CYCIImYCAHG	0.169	0.482	0.349	0.742	0.672	0.486	0.589	0.538	0.647	0.5	0.808	3	oncogene, TSG
O43283/R401W	O43283	MAP3K13	M3K13_HUMAN	R401W	843	αI	-	-	NRPSFrTLMHL	0.292	0.306	0.403	0.577	0.501	0.479	0.493	0.385	0.468	0.538	0.382	3	oncogene, TSG
O43353/N151Y	O43353	RIPK2	RIPK2_HUMAN	N151Y	431	Catalytic-loop	-	-	DLKTQnLLDNE	0.068	0.767	0.165	0.82	0.888	0.226	0.691	0.761	0.831	0.267	0.561	3	NA
O60285/I104S	O60285	NUAK1	NUAK1_HUMAN	I104S	150	αC	-	-	HIRREiIMSSL	0.205	0.404	0.391	0.665	0.643	0.523	0.574	0.47	0.619	0.542	0.56	3	NA
O60307/T543M	O60307	MAST3	MAST3_HUMAN	T543M	536	A-loop	-	-	KQVCGtEYIAP	0.103	0.749	0.148	0.786	0.784	0.262	0.633	0.761	0.832	0.263	0.546	3	NA
O60674/D976N	O60674	JAK2	JAK2_HUMAN	D976N	426	Catalytic-loop;HrD-motif	-	-	RYIHRdATRNI	0.051	0.822	0.128	0.919	0.893	0.227	0.624	0.8	0.908	0.169	0.507	3	oncogene, fusion
O60674/F547L	O60674	JAK2	JAK2_HUMAN	F547L	33	β1	-	-	NEDLIfESLGQ	0.744	0.087	0.169	0.201	0.21	0.51	0.242	0.194	0.123	0.68	0.237	3	oncogene, fusion
O60674/L579F	O60674	JAK2	JAK2_HUMAN	L579F	93	β3	-	-	HETEVlKVLDK	0.533	0.182	0.285	0.332	0.313	0.418	0.342	0.372	0.376	0.548	0.291	3	oncogene, fusion
O60674/L611V	O60674	JAK2	JAK2_HUMAN	L611V	180	αC/β4-loop	-	-	HKHLVlYGVCV	0.301	0.134	0.566	0.657	0.491	0.687	0.635	0.185	0.232	0.792	0.64	3	oncogene, fusion
O60674/R683K	O60674	JAK2	JAK2_HUMAN	R683K	439	Catalytic-loop	-	-	NILLIrEDRKT	0.374	0.198	0.428	0.326	0.28	0.548	0.379	0.243	0.241	0.704	0.203	3	oncogene, fusion
O75385/G12D	O75385	ULK1	ULK1_HUMAN	G12D	26	N-term-β1	-	-	GTETVgFEFSR	0.23	0.325	0.445	0.62	0.521	0.549	0.525	0.356	0.443	0.669	0.36	3	NA
O75676/M520I	O75676	RPS6KA4	KS6A4_HUMAN	M520I	391	αE	-	-	SAVSFmEEAGV	0.311	0.249	0.439	0.532	0.478	0.57	0.533	0.312	0.409	0.67	0.535	3	NA
O75676/R427H	O75676	RPS6KA4	KS6A4_HUMAN	R427H	48	β2	-	-	FSVCRrRQRQS	0.319	0.264	0.417	0.536	0.506	0.519	0.542	0.354	0.398	0.61	0.301	3	NA
O75914/R451Q	O75914	PAK3	PAK3_HUMAN	R451Q	576	A-loop	-	-	PEVVTrAYGPK	0.381	0.208	0.41	0.398	0.386	0.512	0.432	0.319	0.306	0.636	0.259	3	NA
O95747/R319W	O95747	OXSR1	OXSR1_HUMAN	R319W	880	C-term-αI	-	-	RAKKVrVPGSS	0.227	0.334	0.439	0.601	0.585	0.527	0.579	0.402	0.526	0.578	0.414	3	NA
O95835/E689Q	O95835	LATS1	LATS1_HUMAN	E689Q	14	N-term-β1	-	-	MLCQKeNYIRL	0.391	0.195	0.413	0.443	0.404	0.558	0.449	0.288	0.318	0.645	0.335	3	TSG
O96013/P577L	O96013	PAK4	PAK4_HUMAN	P577L	857	αI	-	-	LAKAGpASIVP	0.277	0.199	0.524	0.498	0.526	0.607	0.527	0.315	0.373	0.716	0.441	3	NA
P00519/A366V	P00519	ABL1	ABL1_HUMAN	A366V	429	Catalytic-loop	-	-	HRDLAaNCLVG	0.173	0.504	0.323	0.742	0.739	0.474	0.617	0.473	0.668	0.477	0.512	3	oncogene, fusion
P00519/W430L	P00519	ABL1	ABL1_HUMAN	W430L	596	αF	-	-	FGVLLwIATYG	0.168	0.488	0.343	0.721	0.681	0.439	0.601	0.592	0.716	0.441	0.556	3	oncogene, fusion
P00533/A882T	P00533	EGFR	EGFR_HUMAN	A882T	542	A-loop;APE-motif	-	-	PIKWMaESILH	0.216	0.52	0.264	0.671	0.675	0.389	0.51	0.566	0.612	0.463	0.486	3	oncogene
P00533/G796D	P00533	EGFR	EGFR_HUMAN	G796D	240	β5/αD-loop	-	resistance	QLMPFgLLDYV	0.228	0.372	0.4	0.739	0.584	0.484	0.594	0.413	0.575	0.556	0.774	3	oncogene
P00533/K754E	P00533	EGFR	EGFR_HUMAN	K754E	120	αC	ub	-	EATSPkNKEIL	0.351	0.167	0.482	0.451	0.479	0.633	0.547	0.26	0.415	0.733	0.271	3	oncogene
P00533/K846R	P00533	EGFR	EGFR_HUMAN	K846R	435	Catalytic-loop	ub	-	RNVLVkPQHVK	0.469	0.27	0.261	0.443	0.416	0.414	0.435	0.298	0.379	0.615	0.182	3	oncogene
P00533/L718V	P00533	EGFR	EGFR_HUMAN	L718V	37	β1	-	resistance	KKIKVlSGAFG	0.302	0.37	0.328	0.653	0.539	0.498	0.473	0.371	0.488	0.542	0.714	3	oncogene
P00533/R831C	P00533	EGFR	EGFR_HUMAN	R831C	405	Catalytic-loop	-	-	NYLEDrLVHRD	0.184	0.445	0.371	0.692	0.749	0.456	0.592	0.494	0.701	0.474	0.481	3	oncogene
P00533/T854S	P00533	EGFR	EGFR_HUMAN	T854S	478	Catalytic-loop	-	-	QHVKItFGLAK	0.452	0.227	0.321	0.45	0.405	0.516	0.422	0.296	0.343	0.639	0.443	3	oncogene
P00540/T257M	P00540	MOS	MOS_HUMAN	T257M	582	A-loop	-	-	KGEGVtKADIY	0.259	0.367	0.374	0.574	0.643	0.522	0.575	0.456	0.478	0.601	0.395	3	NA
P04049/V537I	P04049	RAF1	RAF1_HUMAN	V537I	594	αF	-	-	YSYGIvYELMT	0.576	0.198	0.226	0.255	0.293	0.455	0.298	0.272	0.261	0.597	0.243	3	oncogene, fusion
P04626/I886M	P04626	ERBB2	ERBB2_HUMAN	I886M	538	A-loop	-	-	GGKVPiWMALE	0.313	0.418	0.269	0.578	0.543	0.386	0.512	0.488	0.507	0.468	0.451	3	oncogene, fusion
P04626/M833I	P04626	ERBB2	ERBB2_HUMAN	M833I	385	αE	-	-	QIAKGmYLEDV	0.301	0.339	0.36	0.546	0.505	0.457	0.49	0.395	0.48	0.525	0.356	3	oncogene, fusion
P04626/P702L	P04626	ERBB2	ERBB2_HUMAN	P702L	11	N-term-β1	-	-	VEPLTpGAMPN	0.315	0.424	0.261	0.575	0.584	0.409	0.538	0.535	0.559	0.376	0.532	3	oncogene, fusion
P04626/R814H	P04626	ERBB2	ERBB2_HUMAN	R814H	355	αD/αE-loop	-	-	HVRENrRLGSQ	0.662	0.146	0.192	0.257	0.263	0.479	0.284	0.219	0.202	0.628	0.11	3	oncogene, fusion
P04626/W906C	P04626	ERBB2	ERBB2_HUMAN	W906C	589	αF	-	-	HQSDVwYGVTV	0.116	0.651	0.233	0.779	0.69	0.333	0.568	0.651	0.751	0.302	0.559	3	oncogene, fusion
P04629/R780Q	P04629	NTRK1	NTRK1_HUMAN	R780Q	849	αI	-	-	KDVHArQALAQ	0.773	0.098	0.13	0.146	0.169	0.478	0.21	0.214	0.137	0.671	0.095	3	oncogene, TSG, fusion
P05129/S577L	P05129	PRKCG	KPCG_HUMAN	S577L	705	αG/αH-loop	-	-	VTYPKsSREAV	0.41	0.239	0.351	0.426	0.392	0.512	0.433	0.312	0.346	0.655	0.323	3	NA
P05129/V437I	P05129	PRKCG	KPCG_HUMAN	V437I	237	β5/αD-loop	-	-	FVMEYvGGDLM	0.553	0.149	0.298	0.303	0.231	0.509	0.279	0.201	0.257	0.676	0.284	3	NA
P05771/E546V	P05771	PRKCB	KPCB_HUMAN	E546V	638	αG	-	-	FEGEDeELFQS	0.18	0.453	0.368	0.727	0.689	0.479	0.581	0.535	0.678	0.535	0.47	3	inconclusive
P05771/R610H	P05771	PRKCB	KPCB_HUMAN	R610H	863	C-term-αI	-	-	WEKLErEIQPP	0.545	0.171	0.284	0.394	0.295	0.518	0.357	0.273	0.264	0.6	0.294	3	inconclusive
P05771/V419L	P05771	PRKCB	KPCB_HUMAN	V419L	232	β5	-	-	DRLYFvEYVNG	0.238	0.346	0.416	0.622	0.637	0.499	0.566	0.415	0.574	0.589	0.526	3	inconclusive
P07332/A548T	P07332	FES	FES_HUMAN	A548T	17	N-term-β1	-	-	VVLHRaPKDKW	0.669	0.147	0.184	0.285	0.291	0.36	0.221	0.28	0.234	0.613	0.184	3	oncogene, TSG
P07333/A876V	P07333	CSF1R	CSF1R_HUMAN	A876V	677	αG/αH-loop	-	-	DGYQMaPAFAP	0.5	0.177	0.323	0.337	0.303	0.478	0.368	0.298	0.249	0.662	0.265	3	oncogene
P07333/R710H	P07333	CSF1R	CSF1R_HUMAN	R710H	288	αD/αE-loop	-	-	EKKYVrDSGFS	0.856	0.041	0.102	0.112	0.131	0.425	0.17	0.134	0.086	0.672	0.074	3	oncogene
P07947/D364H	P07947	YES1	YES_HUMAN	D364H	354	αD/αE-loop	-	-	FLKEGdKYLKL	0.782	0.103	0.115	0.167	0.164	0.405	0.195	0.189	0.149	0.643	0.162	3	NA
P07949/D892N	P07949	RET	RET_HUMAN	D892N	479	A-loop;DFG-motif	-	-	KMKISdGLSRD	0.067	0.832	0.101	0.885	0.868	0.188	0.604	0.833	0.848	0.177	0.578	3	oncogene, fusion
P07949/G736R	P07949	RET	RET_HUMAN	G736R	43	Gly-rich-loop;β2	-	-	GEGEFgVVKAT	0.079	0.717	0.203	0.842	0.798	0.24	0.629	0.662	0.823	0.217	0.644	3	oncogene, fusion
P07949/R820S	P07949	RET	RET_HUMAN	R820S	257	αD/αE-loop	-	-	FLRESrVGPGY	0.173	0.526	0.301	0.706	0.686	0.386	0.605	0.513	0.626	0.357	0.459	3	oncogene, fusion
P07949/R969W	P07949	RET	RET_HUMAN	R969W	664	αG/αH-loop	-	-	LKTGHrERPDN	0.126	0.646	0.229	0.76	0.724	0.254	0.578	0.65	0.76	0.283	0.457	3	oncogene, fusion
P08581/D1164N	P08581	MET	MET_HUMAN	D1164N	241	β5/αD-loop	-	-	YMKHGdRNFIR	0.211	0.442	0.347	0.621	0.602	0.48	0.557	0.43	0.534	0.493	0.739	3	oncogene
P08581/D1180Y	P08581	MET	MET_HUMAN	D1180Y	370	αE	-	-	NPTVKdIGFGL	0.214	0.456	0.33	0.666	0.677	0.443	0.561	0.524	0.661	0.477	0.536	3	oncogene
P08631/R259W	P08631	HCK	HCK_HUMAN	R259W	28	N-term-β1	-	-	AWEIPrSLKLE	0.248	0.229	0.523	0.607	0.566	0.539	0.578	0.393	0.547	0.552	0.379	3	NA
P08922/K2111R	P08922	ROS1	ROS1_HUMAN	K2111R	499	A-loop	-	-	ARDIYkDYYRK	0.544	0.169	0.288	0.377	0.309	0.396	0.273	0.327	0.266	0.557	0.257	3	oncogene, fusion
P08922/R2116K	P08922	ROS1	ROS1_HUMAN	R2116K	524	A-loop	-	-	KNDYYrRGEGL	0.304	0.358	0.337	0.486	0.438	0.429	0.458	0.405	0.398	0.493	0.313	3	oncogene, fusion
P09619/A713T	P09619	PDGFRB	PGFRB_HUMAN	A713T	273	αD/αE-loop	-	-	RRPPSaLYSNA	0.87	0.041	0.088	0.099	0.129	0.375	0.179	0.112	0.066	0.702	0.099	3	oncogene, fusion
P09619/N666K	P09619	PDGFRB	PGFRB_HUMAN	N666K	180	αC/β4-loop	-	-	HLNVVnLGACT	0.145	0.156	0.699	0.731	0.603	0.755	0.744	0.232	0.341	0.815	0.787	3	oncogene, fusion
P09619/V823I	P09619	PDGFRB	PGFRB_HUMAN	V823I	419	Catalytic-loop	-	-	ASKNCvRDLAA	0.812	0.059	0.129	0.162	0.115	0.383	0.189	0.188	0.1	0.615	0.172	3	oncogene, fusion
P09619/Y589H	P09619	PDGFRB	PGFRB_HUMAN	Y589H	19	N-term-β1	-	-	PMQLPySTWEL	0.188	0.437	0.374	0.761	0.69	0.541	0.626	0.45	0.684	0.577	0.624	3	oncogene, fusion
P09769/E306K	P09769	FGR	FGR_HUMAN	E306K	149	αC	-	-	KAFLEeQVMKL	0.167	0.617	0.216	0.671	0.657	0.305	0.568	0.667	0.73	0.321	0.483	3	NA
P09769/E466K	P09769	FGR	FGR_HUMAN	E466K	642	αG	-	-	GMNKReLEQVE	0.615	0.201	0.184	0.373	0.329	0.446	0.316	0.313	0.243	0.576	0.233	3	NA
P0C1S8/R410W	P0C1S8	WEE2	WEE2_HUMAN	R410W	578	A-loop	-	-	LQEDYrLPKAD	0.437	0.225	0.338	0.446	0.419	0.43	0.457	0.297	0.331	0.581	0.295	3	NA
P0C1S8/S324F	P0C1S8	WEE2	WEE2_HUMAN	S324F	382	αE	-	-	ILLQIsGLNYI	0.433	0.221	0.345	0.395	0.347	0.533	0.446	0.314	0.323	0.646	0.311	3	NA
P0C263/G326R	P0C263	SBK2	SBK2_HUMAN	G326R	854	αI	-	-	IREHLgPWRQR	0.749	0.078	0.172	0.2	0.21	0.491	0.245	0.203	0.169	0.685	0.213	3	NA
P10721/D716N	P10721	KIT	KIT_HUMAN	D716N	287	αD/αE-loop	-	resistance	ESSCSdTNEYM	0.773	0.084	0.143	0.189	0.151	0.48	0.185	0.146	0.102	0.699	0.267	3	oncogene
P10721/D816G	P10721	KIT	KIT_HUMAN	D816G	491	A-loop	-	resistance	FGLARdKNDSN	0.039	0.039	0.922	0.917	0.889	0.954	0.945	0.121	0.561	0.951	0.954	3	oncogene
P10721/K642Q	P10721	KIT	KIT_HUMAN	K642Q	151	αC	-	-	LMSELkLSYLG	0.367	0.259	0.374	0.442	0.428	0.443	0.441	0.353	0.319	0.593	0.404	3	oncogene
P10721/L793S	P10721	KIT	KIT_HUMAN	L793S	427	Catalytic-loop	-	-	CIHRDlARNIL	0.11	0.632	0.259	0.81	0.789	0.301	0.628	0.671	0.812	0.304	0.633	3	oncogene
P10721/M836T	P10721	KIT	KIT_HUMAN	M836T	541	A-loop	-	-	LPVKWmPESIF	0.225	0.409	0.366	0.562	0.546	0.534	0.551	0.489	0.553	0.506	0.521	3	oncogene
P10721/P627L	P10721	KIT	KIT_HUMAN	P627L	107	β3/αC-loop	-	-	VKMLKpAHLTE	0.356	0.346	0.297	0.599	0.623	0.494	0.495	0.461	0.597	0.543	0.524	3	oncogene
P10721/S628N	P10721	KIT	KIT_HUMAN	S628N	111	β3/αC-loop	-	-	KMLKPsHLTER	0.665	0.137	0.198	0.297	0.277	0.448	0.239	0.254	0.235	0.616	0.256	3	oncogene
P11309/A10G	P11309	PIM1	PIM1_HUMAN	A10G	3	N-term-β1	-	-	KINSLaLRAAP	0.569	0.153	0.279	0.327	0.303	0.571	0.337	0.254	0.287	0.686	0.294	3	oncogene, fusion
P11309/A22V	P11309	PIM1	PIM1_HUMAN	A22V	15	N-term-β1	-	-	CNDLHaKLAPG	0.65	0.14	0.211	0.259	0.312	0.475	0.305	0.299	0.203	0.637	0.201	3	oncogene, fusion
P11309/F116L	P11309	PIM1	PIM1_HUMAN	F116L	227	β4/β5-loop	-	-	ERPDSfLILER	0.217	0.303	0.48	0.68	0.601	0.54	0.578	0.448	0.57	0.617	0.531	3	oncogene, fusion
P11309/G78E	P11309	PIM1	PIM1_HUMAN	G78E	121	αC	-	-	RISDWgLPNGT	0.552	0.153	0.294	0.272	0.307	0.531	0.331	0.236	0.301	0.717	0.243	3	oncogene, fusion
P11309/H68D	P11309	PIM1	PIM1_HUMAN	H68D	97	β3	-	-	PVAIKhEKDRI	0.225	0.411	0.364	0.685	0.633	0.543	0.593	0.473	0.626	0.552	0.443	3	oncogene, fusion
P11309/K183N	P11309	PIM1	PIM1_HUMAN	K183N	476	Catalytic-loop	-	-	NRGELkIDFGS	0.177	0.375	0.449	0.662	0.643	0.511	0.635	0.462	0.613	0.512	0.446	3	oncogene, fusion
P11309/L129V	P11309	PIM1	PIM1_HUMAN	L129V	249	αD	-	-	EPVQDlDFITE	0.236	0.451	0.313	0.619	0.573	0.435	0.432	0.491	0.514	0.518	0.498	3	oncogene, fusion
P11309/L193V	P11309	PIM1	PIM1_HUMAN	L193V	492	A-loop	-	-	GSGALlDTVYT	0.582	0.132	0.286	0.379	0.263	0.601	0.395	0.25	0.212	0.642	0.302	3	oncogene, fusion
P11309/L80M	P11309	PIM1	PIM1_HUMAN	L80M	123	αC	-	-	SDWGElNGTRV	0.802	0.075	0.123	0.152	0.177	0.452	0.171	0.182	0.125	0.689	0.215	3	oncogene, fusion
P11309/P87T	P11309	PIM1	PIM1_HUMAN	P87T	147	αC	-	-	NGTRVpEVVLL	0.322	0.254	0.424	0.525	0.538	0.472	0.446	0.417	0.476	0.564	0.415	3	oncogene, fusion
P11309/V236M	P11309	PIM1	PIM1_HUMAN	V236M	599	αF	-	-	LLYDMvGDIPF	0.405	0.237	0.357	0.357	0.322	0.494	0.381	0.268	0.319	0.675	0.315	3	oncogene, fusion
P11309/V69M	P11309	PIM1	PIM1_HUMAN	V69M	98	β3	-	-	VAIKHvKDRIS	0.362	0.268	0.369	0.504	0.466	0.521	0.436	0.375	0.472	0.56	0.433	3	oncogene, fusion
P11309/W109C	P11309	PIM1	PIM1_HUMAN	W109C	185	β4	-	-	IRLLDwERPDS	0.31	0.342	0.348	0.511	0.532	0.455	0.493	0.472	0.519	0.513	0.472	3	oncogene, fusion
P11362/D554H	P11362	FGFR1	FGFR1_HUMAN	D554H	217	β4/β5-loop	-	-	GACTQdPLYVI	0.432	0.212	0.356	0.346	0.295	0.492	0.369	0.243	0.275	0.642	0.279	3	oncogene, fusion
P11362/L614V	P11362	FGFR1	FGFR1_HUMAN	L614V	391	αE	-	-	RGMEYlSKKCI	0.231	0.451	0.318	0.655	0.554	0.469	0.53	0.441	0.508	0.559	0.701	3	oncogene, fusion
P11362/R646W	P11362	FGFR1	FGFR1_HUMAN	R646W	485	A-loop	-	-	DFGLArIHHID	0.064	0.519	0.417	0.839	0.832	0.492	0.786	0.589	0.884	0.461	0.537	3	oncogene, fusion
P11362/R718S	P11362	FGFR1	FGFR1_HUMAN	R718S	664	αG/αH-loop	-	-	LKEGHrDKPSN	0.13	0.537	0.333	0.744	0.705	0.425	0.635	0.558	0.749	0.506	0.514	3	oncogene, fusion
P11362/R734L	P11362	FGFR1	FGFR1_HUMAN	R734L	820	αH	-	-	LYMMMrCWHAV	0.512	0.13	0.359	0.26	0.229	0.57	0.362	0.203	0.191	0.707	0.211	3	oncogene, fusion
P11802/R24S	P11802	CDK4	CDK4_HUMAN	R24S	53	β2	-	-	TVYKArPHSGH	0.199	0.291	0.51	0.612	0.64	0.545	0.604	0.418	0.56	0.67	0.405	3	oncogene
P15056/F595S	P15056	BRAF	BRAF_HUMAN	F595S	480	A-loop;DFG-motif	-	-	VKIGDfLATVK	0.09	0.606	0.304	0.801	0.752	0.303	0.631	0.645	0.786	0.345	0.676	3	oncogene, fusion
P15056/G615R	P15056	BRAF	BRAF_HUMAN	G615R	535	A-loop	-	-	FEQLSgILWMA	0.138	0.566	0.296	0.75	0.776	0.341	0.608	0.627	0.779	0.357	0.619	3	oncogene, fusion
P15056/L618S	P15056	BRAF	BRAF_HUMAN	L618S	539	A-loop	-	-	LSGSIlMAPEV	0.272	0.287	0.441	0.594	0.582	0.483	0.54	0.401	0.51	0.548	0.496	3	oncogene, fusion
P15056/P731S	P15056	BRAF	BRAF_HUMAN	P731S	869	C-term-αI	-	-	RSASEpLNRAG	0.252	0.412	0.336	0.626	0.565	0.421	0.532	0.521	0.607	0.452	0.508	3	oncogene, fusion
P15056/S605G	P15056	BRAF	BRAF_HUMAN	S605G	504	A-loop	p	-	VKSRWsSHQFE	0.135	0.424	0.441	0.81	0.759	0.564	0.824	0.511	0.772	0.55	0.513	3	oncogene, fusion
P15056/W531S	P15056	BRAF	BRAF_HUMAN	W531S	235	β5/αD-loop	-	-	AIVTQwEGSSL	0.134	0.548	0.318	0.814	0.731	0.389	0.645	0.584	0.711	0.392	0.842	3	oncogene, fusion
P15056/W604G	P15056	BRAF	BRAF_HUMAN	W604G	503	A-loop	-	-	TVKSRwGSHQF	0.177	0.349	0.473	0.769	0.694	0.612	0.738	0.465	0.733	0.545	0.74	3	oncogene, fusion
P16066/G548D	P16066	NPR1	ANPRA_HUMAN	G548D	20	N-term-β1	-	-	LLTTEgFQVFA	0.426	0.168	0.406	0.439	0.406	0.553	0.451	0.253	0.294	0.674	0.334	3	NA
P16066/R573H	P16066	NPR1	ANPRA_HUMAN	R573H	114	β3/αC-loop	-	-	RVNRKrELTRK	0.389	0.244	0.368	0.366	0.384	0.499	0.386	0.268	0.273	0.652	0.288	3	NA
P16234/D681G	P16234	PDGFRA	PGFRA_HUMAN	D681G	241	β5/αD-loop	-	-	YCFYGdVNYLH	0.148	0.526	0.326	0.757	0.706	0.467	0.638	0.556	0.701	0.453	0.839	3	oncogene, fusion
P16234/D919E	P16234	PDGFRA	PGFRA_HUMAN	D919E	701	αG/αH-loop	-	-	RMAKPdATSEV	0.759	0.047	0.194	0.133	0.167	0.466	0.224	0.144	0.111	0.703	0.19	3	oncogene, fusion
P16234/Y849C	P16234	PDGFRA	PGFRA_HUMAN	Y849C	508	A-loop	p	-	MHDSNySKGST	0.067	0.459	0.474	0.924	0.933	0.467	0.841	0.652	0.915	0.456	0.635	3	oncogene, fusion
P17612/S110F	P17612	PRKACA	KAPCA_HUMAN	S110F	185	β4	-	-	VKLEFsKDNSN	0.383	0.231	0.386	0.463	0.47	0.499	0.47	0.386	0.435	0.601	0.426	3	oncogene
P17948/A859V	P17948	FLT1	VGFR1_HUMAN	A859V	93	β3	-	-	TCRTVaKMLKE	0.338	0.436	0.226	0.514	0.502	0.393	0.495	0.505	0.563	0.512	0.52	3	NA
P17948/L905V	P17948	FLT1	VGFR1_HUMAN	L905V	227	β4/β5-loop	-	-	KQGGPlVIVEY	0.316	0.2	0.484	0.455	0.395	0.492	0.471	0.322	0.346	0.633	0.409	3	NA
P17948/R1112H	P17948	FLT1	VGFR1_HUMAN	R1112H	654	αG	-	-	EDFCSrREGMR	0.395	0.277	0.328	0.402	0.456	0.506	0.451	0.285	0.325	0.637	0.322	3	NA
P17948/S1080R	P17948	FLT1	VGFR1_HUMAN	S1080R	585	αF	-	-	IYSTKsVWSYG	0.164	0.508	0.327	0.717	0.662	0.437	0.606	0.516	0.637	0.464	0.569	3	NA
P19525/R297H	P19525	EIF2AK2	E2AK2_HUMAN	R297H	97	β3	-	-	TYVIKrKYNNE	0.392	0.238	0.37	0.477	0.445	0.503	0.398	0.308	0.403	0.602	0.25	3	NA
P21709/E782K	P21709	EPHA1	EPHA1_HUMAN	E782K	525	A-loop	-	-	FDGTYeQGGKI	0.619	0.12	0.262	0.459	0.46	0.585	0.542	0.178	0.331	0.764	0.305	3	NA
P21802/H544Q	P21802	FGFR2	FGFR2_HUMAN	H544Q	171	αC/β4-loop	-	-	KMIGKhNIINL	0.148	0.586	0.266	0.689	0.682	0.347	0.606	0.538	0.7	0.319	0.6	3	oncogene, fusion
P21802/P708L	P21802	FGFR2	FGFR2_HUMAN	P708L	637	αF/αG-loop	-	-	PYPGIpEELFK	0.4	0.327	0.273	0.463	0.491	0.477	0.441	0.396	0.403	0.537	0.415	3	oncogene, fusion
P21860/L712R	P21860	ERBB3	ERBB3_HUMAN	L712R	34	β1	-	-	TELRKlVLGSG	0.4	0.238	0.362	0.496	0.454	0.477	0.384	0.349	0.391	0.587	0.394	3	oncogene
P22455/E622Q	P22455	FGFR4	FGFR4_HUMAN	E622Q	439	Catalytic-loop	-	-	NVLVTeNVMKI	0.426	0.208	0.366	0.291	0.339	0.502	0.394	0.267	0.237	0.668	0.29	3	oncogene
P22455/G576D	P22455	FGFR4	FGFR4_HUMAN	G576D	350	αD/αE-loop	-	-	DLSPDgRSSEG	0.7	0.097	0.202	0.201	0.18	0.541	0.295	0.165	0.162	0.739	0.219	3	oncogene
P22455/P587S	P22455	FGFR4	FGFR4_HUMAN	P587S	367	αE	-	-	GPLSFpLVSCA	0.657	0.1	0.244	0.249	0.24	0.514	0.302	0.202	0.167	0.672	0.245	3	oncogene
P22455/R563W	P22455	FGFR4	FGFR4_HUMAN	R563W	254	αD	-	-	LREFLrRRPPG	0.128	0.452	0.42	0.689	0.67	0.5	0.633	0.513	0.664	0.463	0.466	3	oncogene
P22455/S765F	P22455	FGFR4	FGFR4_HUMAN	S765F	872	C-term-αI	-	-	TFGPYsSGGDA	0.224	0.322	0.454	0.676	0.692	0.546	0.626	0.477	0.598	0.614	0.579	3	oncogene
P22607/P766L	P22607	FGFR3	FGFR3_HUMAN	P766L	868	C-term-αI	-	-	LDLSApEQYSP	0.32	0.328	0.352	0.514	0.584	0.483	0.483	0.46	0.516	0.542	0.443	3	oncogene, fusion
P22612/R286K	P22612	PRKACG	KAPCG_HUMAN	R286K	839	αI	-	-	RFGNLrGVGDI	0.911	0.028	0.06	0.086	0.091	0.343	0.143	0.12	0.074	0.69	0.082	3	NA
P22612/V192M	P22612	PRKACG	KAPCG_HUMAN	V192M	492	A-loop	-	-	GFAKRvGRTWT	0.593	0.168	0.239	0.376	0.215	0.536	0.314	0.195	0.183	0.648	0.241	3	NA
P23458/E1029K	P23458	JAK1	JAK1_HUMAN	E1029K	497	A-loop	-	-	LTKAIeDKEYY	0.743	0.073	0.184	0.34	0.214	0.471	0.25	0.176	0.181	0.654	0.274	3	oncogene, TSG
P24723/N437Y	P24723	PRKCH	KPCL_HUMAN	N437Y	238	β5/αD-loop	-	-	VMEFVnGDLMF	0.223	0.395	0.382	0.616	0.571	0.38	0.537	0.447	0.534	0.505	0.554	3	NA
P24941/K56Q	P24941	CDK2	CDK2_HUMAN	K56Q	155	αC/β4-loop	ub	-	EISLLkLNHPN	0.266	0.283	0.451	0.556	0.623	0.526	0.638	0.362	0.501	0.624	0.356	3	NA
P27037/A252T	P27037	ACVR2A	AVR2A_HUMAN	A252T	185	β4	-	-	LQFIGaKRGTS	0.422	0.301	0.278	0.327	0.347	0.468	0.331	0.292	0.339	0.578	0.269	3	TSG
P27361/R359W	P27361	MAPK3	MK03_HUMAN	R359W	881	C-term-αI	-	-	DLPKErKELIF	0.331	0.265	0.405	0.64	0.56	0.459	0.644	0.423	0.541	0.575	0.382	3	NA
P28482/Y131C	P28482	MAPK1	MK01_HUMAN	Y131C	379	αE	-	-	ICYFLyILRGL	0.126	0.512	0.362	0.734	0.727	0.423	0.622	0.585	0.687	0.44	0.522	3	oncogene
P29320/H714R	P29320	EPHA3	EPHA3_HUMAN	H714R	256	αD/αE-loop	-	-	SFLRKhAQFTV	0.328	0.278	0.394	0.486	0.43	0.541	0.522	0.331	0.388	0.667	0.37	3	inconclusive
P29320/R799C	P29320	EPHA3	EPHA3_HUMAN	R799C	549	A-loop	-	-	EAIAYrFTSAS	0.196	0.391	0.414	0.593	0.605	0.471	0.563	0.427	0.56	0.509	0.44	3	inconclusive
P29322/A611V	P29322	EPHA8	EPHA8_HUMAN	A611V	7	N-term-β1	-	-	EPQFYaPHTYE	0.767	0.094	0.139	0.258	0.225	0.403	0.198	0.225	0.145	0.656	0.242	3	NA
P29323/D708N	P29323	EPHB2	EPHB2_HUMAN	D708N	250	αD	-	-	ENGSLdFLRQN	0.241	0.378	0.382	0.654	0.608	0.503	0.525	0.5	0.557	0.561	0.535	3	NA
P29323/E611K	P29323	EPHB2	EPHB2_HUMAN	E611K	20	N-term-β1	-	-	NEAVReAKEID	0.258	0.23	0.512	0.597	0.552	0.53	0.588	0.373	0.389	0.637	0.483	3	NA
P29597/E1053K	P29597	TYK2	TYK2_HUMAN	E1053K	504	A-loop	-	-	VPEGHeYRVRE	0.393	0.204	0.403	0.561	0.516	0.601	0.587	0.426	0.433	0.631	0.364	3	NA
P30291/T493I	P30291	WEE1	WEE1_HUMAN	T493I	579	A-loop	-	-	LQENYtLPKAD	0.431	0.252	0.317	0.472	0.449	0.494	0.458	0.359	0.396	0.583	0.436	3	NA
P30530/G692R	P30530	AXL	UFO_HUMAN	G692R	481	A-loop;DFG-motif	-	-	CVADFgSKKIY	0.121	0.418	0.461	0.803	0.818	0.522	0.731	0.517	0.74	0.528	0.629	3	NA
P30530/T806R	P30530	AXL	UFO_HUMAN	T806R	853	αI	-	-	EDLENtKALPP	0.588	0.162	0.249	0.258	0.228	0.484	0.287	0.27	0.226	0.67	0.234	3	NA
P31152/D336N	P31152	MAPK4	MK04_HUMAN	D336N	876	C-term-αI	-	-	EDEIDdVLMAA	0.586	0.207	0.207	0.335	0.328	0.448	0.256	0.369	0.258	0.589	0.234	3	NA
P31749/V416M	P31749	AKT1	AKT1_HUMAN	V416M	860	C-term-αI	-	-	IVWQHvEKKLS	0.592	0.166	0.243	0.4	0.294	0.519	0.381	0.259	0.336	0.658	0.306	3	oncogene
P31751/E405Q	P31751	AKT2	AKT2_HUMAN	E405Q	848	αI	-	-	AKEVMeRFFLS	0.912	0.026	0.062	0.1	0.092	0.365	0.155	0.127	0.077	0.673	0.136	3	oncogene
P31751/H355Y	P31751	AKT2	AKT2_HUMAN	H355Y	638	αG	-	-	FYNQDhRLFEL	0.221	0.408	0.371	0.65	0.672	0.482	0.569	0.467	0.6	0.524	0.408	3	oncogene
P31751/I289M	P31751	AKT2	AKT2_HUMAN	I289M	475	Catalytic-loop	-	-	DKDGHiITDFG	0.247	0.362	0.391	0.593	0.584	0.526	0.549	0.488	0.546	0.5	0.527	3	oncogene
P36507/G307C	P36507	MAP2K2	MP2K2_HUMAN	G307C	719	αG/αH-loop	-	-	GRPVSgGMDSR	0.322	0.273	0.406	0.479	0.444	0.49	0.481	0.325	0.423	0.657	0.346	3	oncogene
P36507/R231C	P36507	MAP2K2	MP2K2_HUMAN	R231C	538	A-loop	-	-	SFVGTrYMAPE	0.365	0.229	0.406	0.5	0.456	0.501	0.508	0.346	0.468	0.604	0.292	3	oncogene
P36507/R231H	P36507	MAP2K2	MP2K2_HUMAN	R231H	538	A-loop	-	-	SFVGTrYMAPE	0.31	0.34	0.35	0.481	0.492	0.475	0.544	0.34	0.433	0.572	0.309	3	oncogene
P36507/R357W	P36507	MAP2K2	MP2K2_HUMAN	R357W	832	αH/αI-loop	-	-	KNPAErDLKML	0.105	0.698	0.197	0.747	0.753	0.232	0.575	0.671	0.782	0.254	0.451	3	oncogene
P36888/A813T	P36888	FLT3	FLT3_HUMAN	A813T	428	Catalytic-loop	-	-	VHRDLaRNVLV	0.17	0.577	0.253	0.775	0.775	0.385	0.537	0.661	0.705	0.379	0.53	3	oncogene
P36888/A814V	P36888	FLT3	FLT3_HUMAN	A814V	429	Catalytic-loop	-	-	HRDLAaNVLVT	0.198	0.492	0.311	0.742	0.735	0.495	0.613	0.447	0.679	0.508	0.541	3	oncogene
P36888/G798R	P36888	FLT3	FLT3_HUMAN	G798R	384	αE	-	-	YQVAKgEFLEF	0.151	0.584	0.265	0.736	0.696	0.371	0.579	0.609	0.696	0.354	0.592	3	oncogene
P36888/G905E	P36888	FLT3	FLT3_HUMAN	G905E	662	αG/αH-loop	-	-	KLIQNgKMDQP	0.194	0.58	0.226	0.729	0.693	0.344	0.573	0.561	0.69	0.334	0.579	3	oncogene
P36888/M737I	P36888	FLT3	FLT3_HUMAN	M737I	287	αD/αE-loop	-	-	HPNSSmGSREV	0.597	0.153	0.25	0.278	0.249	0.525	0.312	0.239	0.172	0.72	0.277	3	oncogene
P36888/S762C	P36888	FLT3	FLT3_HUMAN	S762C	337	αD/αE-loop	-	-	GNSFHsDEIEY	0.718	0.107	0.175	0.259	0.237	0.384	0.263	0.248	0.194	0.634	0.177	3	oncogene
P36894/E468K	P36894	BMPR1A	BMR1A_HUMAN	E468K	631	αF/αG-loop	-	-	SDPSYeMREVV	0.238	0.441	0.321	0.554	0.542	0.427	0.442	0.534	0.498	0.476	0.426	3	oncogene, TSG
P36894/R284C	P36894	BMPR1A	BMR1A_HUMAN	R284C	162	αC/β4-loop	-	-	QTVLMrENILG	0.159	0.49	0.351	0.712	0.704	0.376	0.57	0.589	0.705	0.386	0.469	3	oncogene, TSG
P36894/R486Q	P36894	BMPR1A	BMR1A_HUMAN	R486Q	664	αG/αH-loop	-	-	PIVSNrNSDEC	0.327	0.286	0.387	0.511	0.428	0.5	0.496	0.296	0.373	0.616	0.258	3	oncogene, TSG
P36896/D268E	P36896	ACVR1B	ACV1B_HUMAN	D268E	187	β4/β5-loop	-	-	GFIAAdKDNGT	0.243	0.273	0.485	0.536	0.475	0.579	0.537	0.325	0.461	0.681	0.449	3	TSG
P37023/L190F	P37023	ACVRL1	ACVL1_HUMAN	L190F	17	N-term-β1	-	-	GSGSGlFLVQR	0.282	0.381	0.337	0.544	0.526	0.411	0.442	0.474	0.486	0.56	0.422	3	NA
P37023/T271M	P37023	ACVRL1	ACVL1_HUMAN	T271M	218	β4/β5-loop	-	-	SRNSStLWLIT	0.351	0.28	0.37	0.496	0.48	0.465	0.484	0.391	0.4	0.547	0.423	3	NA
P37173/N435S	P37173	TGFBR2	TGFR2_HUMAN	N435S	551	A-loop	-	decrease	LESRMnENVES	0.304	0.338	0.358	0.507	0.471	0.459	0.44	0.343	0.392	0.613	0.389	3	TSG
P41743/R523Q	P41743	PRKCI	KPCI_HUMAN	R523Q	853	αI	-	-	GHPFFrVDWDM	0.737	0.095	0.168	0.159	0.15	0.472	0.218	0.2	0.115	0.695	0.102	3	NA
P42679/G320S	P42679	MATK	MATK_HUMAN	G320S	354	αD/αE-loop	-	-	FLRTRgALVNT	0.269	0.327	0.405	0.547	0.528	0.459	0.472	0.47	0.522	0.575	0.44	3	NA
P42681/A392T	P42681	TXK	TXK_HUMAN	A392T	428	Catalytic-loop	-	-	IHRDLaRNCLV	0.186	0.512	0.302	0.736	0.74	0.395	0.537	0.666	0.721	0.388	0.498	3	NA
P42685/N359I	P42685	FRK	FRK_HUMAN	N359I	431	Catalytic-loop	-	-	DLAARnLVGEH	0.049	0.8	0.151	0.833	0.9	0.218	0.688	0.774	0.879	0.29	0.587	3	NA
P43405/E373K	P43405	SYK	KSYK_HUMAN	E373K	30	N-term-β1	-	-	KLLTLeKELGS	0.788	0.095	0.117	0.212	0.212	0.405	0.19	0.192	0.194	0.645	0.195	3	oncogene, fusion
P43405/I471M	P43405	SYK	KSYK_HUMAN	I471M	371	αE	-	-	VKDKNiELVHQ	0.712	0.112	0.175	0.13	0.169	0.448	0.176	0.185	0.141	0.682	0.159	3	oncogene, fusion
P45983/R69W	P45983	MAPK8	MK08_HUMAN	R69W	145	αC	-	-	QTHAKrYRELV	0.123	0.509	0.368	0.758	0.692	0.412	0.619	0.532	0.707	0.437	0.425	3	NA
P45985/D247N	P45985	MAP2K4	MP2K4_HUMAN	D247N	479	A-loop;DFG-motif	-	-	NIKLCdGISGQ	0.02	0.938	0.042	0.949	0.957	0.105	0.639	0.916	0.941	0.074	0.616	3	oncogene, TSG
P45985/E273G	P45985	MAP2K4	MP2K4_HUMAN	E273G	544	A-loop;APE-motif	-	-	PYMAPeIDPSA	0.094	0.738	0.168	0.837	0.824	0.17	0.582	0.767	0.848	0.205	0.568	3	oncogene, TSG
P45985/P268S	P45985	MAP2K4	MP2K4_HUMAN	P268S	539	A-loop	-	-	DAGCRpMAPER	0.63	0.128	0.242	0.282	0.296	0.47	0.277	0.265	0.186	0.612	0.21	3	oncogene, TSG
P45985/Y358C	P45985	MAP2K4	MP2K4_HUMAN	Y358C	842	αI	-	-	SKRPKyELLKH	0.308	0.304	0.388	0.537	0.449	0.504	0.473	0.352	0.443	0.592	0.353	3	oncogene, TSG
P46734/G272E	P46734	MAP2K3	MP2K3_HUMAN	G272E	642	αG	-	-	PYESWgPFQQL	0.56	0.135	0.305	0.274	0.299	0.522	0.332	0.209	0.215	0.673	0.22	3	NA
P48729/Q198K	P48729	CSNK1A1	KC1A_HUMAN	Q198K	579	A-loop	-	-	HLGIEqRRDDM	0.299	0.346	0.355	0.571	0.494	0.423	0.466	0.351	0.47	0.523	0.418	3	NA
P48729/S27C	P48729	CSNK1A1	KC1A_HUMAN	S27C	41	Gly-rich-loop;β1/β2-loop	-	-	KIGSGsGDIYL	0.36	0.357	0.283	0.623	0.59	0.464	0.521	0.478	0.555	0.462	0.438	3	NA
P49336/K242R	P49336	CDK8	CDK8_HUMAN	K242R	648	αG	-	-	RQEDIkSNPYH	0.463	0.243	0.293	0.326	0.335	0.504	0.33	0.299	0.253	0.638	0.267	3	NA
P49759/T377A	P49759	CLK1	CLK1_HUMAN	T377A	608	αF/αG-loop	-	-	YYLGFtFPTHD	0.432	0.273	0.295	0.422	0.454	0.428	0.388	0.425	0.363	0.541	0.279	3	NA
P49760/A480T	P49760	CLK2	CLK2_HUMAN	A480T	853	αI	-	-	QHPFFaLRAEP	0.912	0.021	0.067	0.099	0.087	0.393	0.129	0.121	0.065	0.682	0.111	3	NA
P49841/R96G	P49841	GSK3B	GSK3B_HUMAN	R96G	148	αC	-	-	KRFKNrLQIMR	0.139	0.631	0.23	0.76	0.709	0.31	0.576	0.643	0.791	0.32	0.522	3	NA
P49841/S215L	P49841	GSK3B	GSK3B_HUMAN	S215L	529	A-loop	p	-	GEPNVsICSRY	0.06	0.592	0.349	0.967	0.972	0.492	0.933	0.566	0.94	0.506	0.577	3	NA
P50613/K41N	P50613	CDK7	CDK7_HUMAN	K41N	96	β3;Catalytic-Lys	-	-	QIVAIkIKLGH	0.003	0.992	0.006	0.99	0.989	0.011	0.685	0.986	0.989	0.02	0.487	3	NA
P50613/P253L	P50613	CDK7	CDK7_HUMAN	P253L	716	αG/αH-loop	-	-	TFKSFpIPLHH	0.388	0.318	0.293	0.474	0.433	0.444	0.448	0.413	0.43	0.483	0.438	3	NA
P51617/A279V	P51617	IRAK1	IRAK1_HUMAN	A279V	188	β4/β5-loop	-	-	FAGYCaNGFYC	0.897	0.033	0.07	0.103	0.112	0.411	0.153	0.133	0.071	0.702	0.12	3	NA
P51812/L145H	P51812	RPS6KA3	KS6A3_HUMAN	L145H	231	β5	-	-	EGKLYlLDFLR	0.134	0.549	0.318	0.753	0.715	0.349	0.62	0.6	0.733	0.417	0.64	3	NA
P51812/Y483C	P51812	RPS6KA3	KS6A3_HUMAN	Y483C	187	β4/β5-loop	p	-	TLKDVyDGKYV	0.138	0.368	0.494	0.741	0.699	0.575	0.699	0.447	0.692	0.645	0.501	3	NA
P51955/P269T	P51955	NEK2	NEK2_HUMAN	P269T	850	αI	-	-	EILENpIADLV	0.417	0.276	0.307	0.434	0.45	0.459	0.46	0.404	0.373	0.517	0.421	3	NA
P52333/A634T	P52333	JAK3	JAK3_HUMAN	A634T	384	αE	-	-	KQLAYaNYLED	0.254	0.408	0.337	0.616	0.56	0.433	0.486	0.415	0.487	0.547	0.448	3	oncogene
P52333/L527P	P52333	JAK3	JAK3_HUMAN	L527P	37	β1	-	-	EWHENlHGSFT	0.216	0.42	0.363	0.688	0.6	0.474	0.568	0.469	0.586	0.501	0.671	3	oncogene
P52333/P1030L	P52333	JAK3	JAK3_HUMAN	P1030L	613	αF/αG-loop	-	-	DKSCSpAEFLR	0.307	0.299	0.394	0.513	0.518	0.501	0.462	0.432	0.454	0.56	0.461	3	oncogene
P53667/R320L	P53667	LIMK1	LIMK1_HUMAN	R320L	10	N-term-β1	-	-	RKDLGrESLRV	0.193	0.492	0.314	0.662	0.65	0.495	0.639	0.547	0.645	0.493	0.487	3	NA
P54646/R110W	P54646	PRKAA2	AAPK2_HUMAN	R110W	358	αD/αE-loop	-	-	ICKHGrEEMEA	0.214	0.443	0.343	0.668	0.642	0.444	0.541	0.474	0.585	0.473	0.422	3	NA
P54646/R53H	P54646	PRKAA2	AAPK2_HUMAN	R53H	117	β3/αC-loop	-	-	NRQKIrLDVVG	0.562	0.193	0.244	0.302	0.23	0.443	0.27	0.262	0.237	0.548	0.165	3	NA
P54753/R724Q	P54753	EPHB3	EPHB3_HUMAN	R724Q	254	αD	-	-	LDSFLrNDGQF	0.258	0.235	0.507	0.522	0.478	0.583	0.492	0.303	0.437	0.682	0.327	3	NA
P54760/A800T	P54760	EPHB4	EPHB4_HUMAN	A800T	584	αF	-	-	RKFTSaDAWSY	0.279	0.357	0.364	0.539	0.574	0.45	0.48	0.429	0.407	0.554	0.407	3	NA
P54760/A882T	P54760	EPHB4	EPHB4_HUMAN	A882T	858	αI	-	neutral	MIRNPaLKIVA	0.858	0.042	0.1	0.137	0.134	0.478	0.232	0.146	0.102	0.733	0.138	3	NA
P54760/S703F	P54760	EPHB4	EPHB4_HUMAN	S703F	251	αD	-	-	NGALDsLRLND	0.285	0.277	0.439	0.615	0.523	0.503	0.474	0.421	0.49	0.616	0.52	3	NA
P54762/R663L	P54762	EPHB1	EPHB1_HUMAN	R663L	144	αC	-	-	SEKQRrFLSEA	0.543	0.194	0.263	0.289	0.293	0.486	0.305	0.293	0.279	0.633	0.231	3	NA
P54762/R905C	P54762	EPHB1	EPHB1_HUMAN	R905C	877	C-term-αI	-	-	QPLLDrIPDFT	0.327	0.283	0.39	0.526	0.433	0.533	0.533	0.351	0.396	0.631	0.401	3	NA
P54762/V897M	P54762	EPHB1	EPHB1_HUMAN	V897M	869	C-term-αI	-	-	ATITAvSQPLL	0.898	0.027	0.075	0.081	0.089	0.381	0.142	0.106	0.072	0.713	0.125	3	NA
P54764/G821E	P54764	EPHA4	EPHA4_HUMAN	G821E	604	αF/αG-loop	-	-	EVMSYgRPYWD	0.242	0.367	0.391	0.625	0.6	0.528	0.632	0.429	0.54	0.603	0.584	3	NA
P57058/A316V	P57058	HUNK	HUNK_HUMAN	A316V	848	αI	-	-	IQQALaRWLNE	0.619	0.166	0.214	0.254	0.2	0.485	0.26	0.228	0.202	0.67	0.203	3	NA
P57058/R119C	P57058	HUNK	HUNK_HUMAN	R119C	162	αC/β4-loop	-	-	IQQMIrPNITQ	0.287	0.384	0.33	0.615	0.612	0.365	0.506	0.527	0.573	0.408	0.434	3	NA
P57059/P187L	P57059	SIK1	SIK1_HUMAN	P187L	538	A-loop	-	-	TWCGSpYAAPE	0.242	0.46	0.298	0.622	0.645	0.402	0.613	0.536	0.593	0.441	0.531	3	NA
P57059/P192L	P57059	SIK1	SIK1_HUMAN	P192L	543	A-loop;APE-motif	-	-	PPYAApVFEGK	0.246	0.509	0.245	0.586	0.62	0.302	0.52	0.629	0.604	0.321	0.509	3	NA
Q00526/R150C	Q00526	CDK3	CDK3_HUMAN	R150C	485	A-loop	-	-	DFGLArFGVPL	0.076	0.453	0.471	0.771	0.828	0.535	0.78	0.56	0.853	0.449	0.492	3	NA
Q00526/R157H	Q00526	CDK3	CDK3_HUMAN	R157H	507	A-loop	-	-	FGVPLrYTHEV	0.209	0.196	0.595	0.737	0.604	0.712	0.748	0.308	0.52	0.729	0.458	3	NA
Q00532/A49V	Q00532	CDKL1	CDKL1_HUMAN	A49V	146	αC	-	-	VIKKIaREIRM	0.306	0.276	0.418	0.485	0.439	0.51	0.455	0.345	0.401	0.613	0.403	3	NA
Q00532/H125Y	Q00532	CDKL1	CDKL1_HUMAN	H125Y	423	Catalytic-loop;HrD-motif	-	-	KHNCIhDVKPE	0.13	0.603	0.266	0.646	0.665	0.365	0.586	0.576	0.699	0.328	0.493	3	NA
Q00534/P199L	Q00534	CDK6	CDK6_HUMAN	P199L	584	αF	-	-	SSYATpDLWSV	0.339	0.289	0.373	0.529	0.593	0.507	0.501	0.432	0.495	0.591	0.458	3	oncogene, fusion
Q00536/T366M	Q00536	CDK16	CDK16_HUMAN	T366M	637	αF/αG-loop	-	-	LFPGStEEQLH	0.286	0.387	0.327	0.574	0.606	0.448	0.512	0.476	0.506	0.559	0.454	3	NA
Q00537/D260H	Q00537	CDK17	CDK17_HUMAN	D260H	217	β4/β5-loop	-	-	DIVHTdSLTLV	0.494	0.185	0.32	0.275	0.295	0.511	0.357	0.258	0.264	0.657	0.271	3	NA
Q00537/P341L	Q00537	CDK17	CDK17_HUMAN	P341L	503	A-loop	-	-	RAKSVpKTYSN	0.261	0.348	0.391	0.628	0.684	0.445	0.657	0.465	0.598	0.478	0.573	3	NA
Q02750/E44G	Q02750	MAP2K1	MP2K1_HUMAN	E44G	7	N-term-β1	-	-	ELELDeQRKRL	0.335	0.321	0.344	0.537	0.392	0.52	0.472	0.393	0.379	0.592	0.41	3	oncogene
Q02750/R181M	Q02750	MAP2K1	MP2K1_HUMAN	R181M	393	αE	-	-	GLTYLrKHKIM	0.298	0.281	0.421	0.603	0.536	0.485	0.526	0.384	0.479	0.543	0.388	3	oncogene
Q02763/R842C	Q02763	TEK	TIE2_HUMAN	R842C	53	β2	-	-	QVLKArKKDGL	0.336	0.214	0.451	0.476	0.398	0.571	0.52	0.304	0.4	0.707	0.301	3	NA
Q04759/G463R	Q04759	PRKCQ	KPCT_HUMAN	G463R	239	β5/αD-loop	-	-	MEYLNgDLMYH	0.206	0.403	0.391	0.625	0.626	0.504	0.639	0.442	0.63	0.576	0.692	3	NA
Q06187/E439K	Q06187	BTK	BTK_HUMAN	E439K	120	αC	-	-	EGSMSeEFIEE	0.242	0.251	0.507	0.58	0.538	0.549	0.557	0.39	0.495	0.668	0.476	3	oncogene, TSG
Q06187/E488K	Q06187	BTK	BTK_HUMAN	E488K	255	αD/αE-loop	-	-	LNYLReRHRFQ	0.891	0.037	0.072	0.13	0.09	0.371	0.164	0.128	0.109	0.691	0.135	3	oncogene, TSG
Q06187/G411V	Q06187	BTK	BTK_HUMAN	G411V	40	β1;Gly-rich-loop	-	-	KELGTgFGVVK	0.071	0.808	0.121	0.849	0.876	0.226	0.628	0.782	0.88	0.241	0.635	3	oncogene, TSG
Q08345/H745R	Q08345	DDR1	DDR1_HUMAN	H745R	376	αE	-	-	YPMLLhAAQIA	0.483	0.225	0.292	0.409	0.325	0.496	0.366	0.276	0.275	0.701	0.319	3	NA
Q09013/P352L	Q09013	DMPK	DMPK_HUMAN	P352L	865	C-term-αI	-	-	LRDSVpFTPDF	0.384	0.26	0.356	0.453	0.48	0.494	0.486	0.364	0.398	0.618	0.465	3	NA
Q12866/M790V	Q12866	MERTK	MERTK_HUMAN	M790V	595	αF	-	-	AFGVTmEIATR	0.336	0.307	0.357	0.513	0.486	0.507	0.454	0.355	0.401	0.588	0.427	3	NA
Q12866/S781R	Q12866	MERTK	MERTK_HUMAN	S781R	585	αF	-	-	VYTSKsVWAFG	0.211	0.468	0.321	0.686	0.645	0.447	0.591	0.478	0.606	0.476	0.574	3	NA
Q12866/V864I	Q12866	MERTK	MERTK_HUMAN	V864I	861	C-term-αI	-	-	ESLPDvNQADV	0.677	0.15	0.173	0.32	0.292	0.435	0.34	0.242	0.325	0.657	0.234	3	NA
Q13043/P242L	Q13043	STK4	STK4_HUMAN	P242L	691	αG/αH-loop	-	-	PTNPPpFRKPE	0.342	0.41	0.248	0.525	0.524	0.369	0.433	0.511	0.548	0.371	0.468	3	NA
Q13153/E456K	Q13153	PAK1	PAK1_HUMAN	E456K	597	αF	-	-	GIMAIeIEGEP	0.124	0.596	0.28	0.719	0.703	0.358	0.565	0.609	0.76	0.389	0.521	3	NA
Q13163/A437V	Q13163	MAP2K5	MP2K5_HUMAN	A437V	870	C-term-αI	-	-	MWVCRaEERRS	0.851	0.065	0.084	0.169	0.184	0.36	0.184	0.141	0.106	0.686	0.119	3	NA
Q13164/D317N	Q13164	MAPK7	MK07_HUMAN	D317N	802	αG/αH-loop	-	-	VYPGAdQALSL	0.607	0.175	0.219	0.28	0.294	0.444	0.252	0.264	0.29	0.606	0.186	3	NA
Q13233/E1419K	Q13233	MAP3K1	M3K1_HUMAN	E1419K	544	A-loop;APE-motif	-	-	AFMAPeLRGQQ	0.075	0.75	0.176	0.806	0.822	0.218	0.563	0.78	0.866	0.216	0.529	3	oncogene, TSG
Q13233/G1436S	Q13233	MAP3K1	M3K1_HUMAN	G1436S	592	αF	-	-	DVWSVgAIIEM	0.229	0.543	0.229	0.641	0.621	0.308	0.557	0.596	0.635	0.339	0.537	3	oncogene, TSG
Q13233/K1272T	Q13233	MAP3K1	M3K1_HUMAN	K1272T	96	β3;Catalytic-Lys	-	-	TLMAVkVTYVR	0.003	0.996	0.001	0.987	0.979	0.014	0.661	0.991	0.986	0.015	0.524	3	oncogene, TSG
Q13237/G339D	Q13237	PRKG2	KGP2_HUMAN	G339D	372	αE	-	-	TQSTEgDQPQL	0.785	0.095	0.12	0.199	0.26	0.415	0.23	0.229	0.205	0.643	0.157	3	NA
Q13237/G713C	Q13237	PRKG2	KGP2_HUMAN	G713C	854	αI	-	-	HRWLNgNWEGL	0.322	0.317	0.361	0.477	0.441	0.448	0.415	0.375	0.421	0.572	0.441	3	NA
Q13418/P252S	Q13418	ILK	ILK_HUMAN	P252S	180	αC/β4-loop	-	-	HPNVLpLGACQ	0.209	0.133	0.658	0.672	0.553	0.69	0.678	0.238	0.289	0.8	0.722	3	NA
Q13546/V91M	Q13546	RIPK1	RIPK1_HUMAN	V91M	232	β5	-	-	GKYSLvEYMEK	0.234	0.457	0.309	0.577	0.597	0.43	0.544	0.491	0.576	0.49	0.516	3	NA
Q13627/G348R	Q13627	DYRK1A	DYR1A_HUMAN	G348R	592	αF	-	-	DMWSLgILVEM	0.218	0.539	0.243	0.651	0.689	0.221	0.548	0.633	0.682	0.257	0.558	3	NA
Q13882/E429K	Q13882	PTK6	PTK6_HUMAN	E429K	828	αH/αI-loop	-	-	WCRDPeRPCFK	0.781	0.088	0.131	0.208	0.193	0.413	0.217	0.236	0.16	0.633	0.181	3	oncogene, TSG
Q14164/E50K	Q14164	IKBKE	IKKE_HUMAN	E50K	122	αC	-	-	YLRPReQVREF	0.607	0.164	0.228	0.293	0.27	0.488	0.288	0.283	0.224	0.673	0.208	3	NA
Q14164/R134C	Q14164	IKBKE	IKKE_HUMAN	R134C	424	Catalytic-loop;HrD-motif	-	-	NGIVHrIKPGN	0.099	0.573	0.328	0.796	0.787	0.401	0.651	0.624	0.823	0.361	0.53	3	NA
Q14164/R236W	Q14164	IKBKE	IKKE_HUMAN	R236W	865	C-term-αI	-	-	KEIMYrTTEKP	0.316	0.273	0.41	0.634	0.539	0.526	0.568	0.376	0.47	0.597	0.41	3	NA
Q14164/S31F	Q14164	IKBKE	IKKE_HUMAN	S31F	79	β2/β3-loop	-	-	ARNKKsELVAV	0.26	0.377	0.363	0.665	0.602	0.413	0.6	0.486	0.592	0.516	0.489	3	NA
Q14164/V171I	Q14164	IKBKE	IKKE_HUMAN	V171I	528	A-loop	-	-	DDEKFvVYGTE	0.592	0.155	0.253	0.461	0.428	0.43	0.468	0.314	0.374	0.589	0.298	3	NA
Q14289/A612V	Q14289	PTK2B	FAK2_HUMAN	A612V	592	αF	-	-	DVWMFaCMWEI	0.33	0.361	0.31	0.49	0.505	0.387	0.451	0.441	0.44	0.479	0.35	3	NA
Q15303/E969K	Q15303	ERBB4	ERBB4_HUMAN	E969K	845	αI	-	-	RPKFKeAAEFS	0.468	0.241	0.291	0.389	0.335	0.483	0.369	0.281	0.283	0.629	0.223	3	oncogene, TSG
Q15303/S774G	Q15303	ERBB4	ERBB4_HUMAN	S774G	156	αC/β4-loop	-	-	ALIMAsDHPHL	0.295	0.321	0.384	0.511	0.491	0.513	0.454	0.353	0.406	0.636	0.402	3	oncogene, TSG
Q15349/A563T	Q15349	RPS6KA2	KS6A2_HUMAN	A563T	499	A-loop	-	-	AKQLRaNGLLM	0.371	0.303	0.326	0.498	0.469	0.482	0.422	0.342	0.346	0.583	0.399	3	NA
Q15375/H726R	Q15375	EPHA7	EPHA7_HUMAN	H726R	256	αD/αE-loop	-	-	AFLRKhGQFTV	0.382	0.234	0.384	0.432	0.376	0.543	0.486	0.288	0.301	0.682	0.334	3	inconclusive
Q15418/S457L	Q15418	RPS6KA1	KS6A1_HUMAN	S457L	120	αC	-	-	SKRDPsEIEIL	0.312	0.219	0.469	0.573	0.539	0.539	0.568	0.378	0.446	0.656	0.454	3	NA
Q15746/P1519H	Q15746	MYLK	MYLK_HUMAN	P1519H	172	αC/β4-loop	-	-	NCLHHpLVQCV	0.365	0.254	0.382	0.491	0.408	0.505	0.488	0.312	0.378	0.575	0.483	3	NA
Q15759/R57C	Q15759	MAPK11	MK11_HUMAN	R57C	106	β3/αC-loop	-	-	VKKLSrFQSLI	0.182	0.468	0.35	0.679	0.663	0.434	0.578	0.497	0.69	0.434	0.443	3	NA
Q15759/V52M	Q15759	MAPK11	MK11_HUMAN	V52M	94	β3	-	-	RQKVAvKLSRP	0.418	0.241	0.341	0.493	0.446	0.45	0.458	0.356	0.376	0.521	0.383	3	NA
Q15831/D194V	Q15831	STK11	STK11_HUMAN	D194V	479	A-loop;DFG-motif	-	-	TLKISdGVAEA	0.028	0.944	0.028	0.923	0.944	0.071	0.576	0.943	0.883	0.063	0.586	3	TSG
Q15831/H174R	Q15831	STK11	STK11_HUMAN	H174R	423	Catalytic-loop;HrD-motif	-	loss	SQGIVhDIKPG	0.127	0.619	0.254	0.719	0.699	0.318	0.615	0.632	0.73	0.363	0.5	3	TSG
Q15831/I303M	Q15831	STK11	STK11_HUMAN	I303M	846	αI	-	-	FSIRQiQHSWF	0.315	0.298	0.387	0.434	0.427	0.504	0.447	0.293	0.333	0.657	0.37	3	TSG
Q16288/E810Q	Q16288	NTRK3	NTRK3_HUMAN	E810Q	826	αH/αI-loop	-	-	GCWQReQQRLN	0.611	0.132	0.257	0.185	0.235	0.499	0.291	0.211	0.182	0.737	0.169	3	oncogene, fusion
Q16288/G545A	Q16288	NTRK3	NTRK3_HUMAN	G545A	38	β1;Gly-rich-loop	-	-	LKRELgGAFGK	0.112	0.447	0.442	0.782	0.782	0.469	0.682	0.53	0.762	0.532	0.68	3	oncogene, fusion
Q16288/G547R	Q16288	NTRK3	NTRK3_HUMAN	G547R	40	β1;Gly-rich-loop	-	-	RELGEgFGKVF	0.058	0.803	0.139	0.868	0.869	0.285	0.657	0.76	0.872	0.297	0.664	3	oncogene, fusion
Q16288/P526Q	Q16288	NTRK3	NTRK3_HUMAN	P526Q	18	N-term-β1	-	-	HNCHKpTYVQH	0.577	0.159	0.264	0.407	0.336	0.529	0.357	0.277	0.301	0.612	0.283	3	oncogene, fusion
Q16512/V694M	Q16512	PKN1	PKN1_HUMAN	V694M	232	β5	-	-	EHVCFvEYSAG	0.193	0.445	0.362	0.639	0.662	0.461	0.627	0.476	0.682	0.52	0.569	3	NA
Q16539/A51V	Q16539	MAPK14	MK14_HUMAN	A51V	93	β3	-	-	TGLRVaKKLSR	0.302	0.489	0.209	0.545	0.532	0.386	0.507	0.541	0.626	0.433	0.533	3	NA
Q16566/L93F	Q16566	CAMK4	KCC4_HUMAN	L93F	154	αC	-	-	TEIGVlRLSHP	0.279	0.334	0.387	0.601	0.517	0.469	0.505	0.446	0.431	0.547	0.604	3	NA
Q16620/E546K	Q16620	NTRK2	NTRK2_HUMAN	E546K	39	β1;Gly-rich-loop	-	-	KRELGeAFGKV	0.195	0.46	0.345	0.78	0.71	0.434	0.589	0.541	0.678	0.45	0.588	3	oncogene, fusion
Q16620/L654M	Q16620	NTRK2	NTRK2_HUMAN	L654M	372	αE	-	-	TQSQMlIAQQI	0.683	0.151	0.166	0.179	0.203	0.432	0.215	0.279	0.215	0.623	0.23	3	oncogene, fusion
Q16620/P644L	Q16620	NTRK2	NTRK2_HUMAN	P644L	354	αD/αE-loop	-	-	MAEGNpTELTQ	0.689	0.134	0.177	0.184	0.213	0.433	0.239	0.239	0.154	0.647	0.134	3	oncogene, fusion
Q16659/S247Y	Q16659	MAPK6	MK06_HUMAN	S247Y	661	αG/αH-loop	-	-	QLILEsPVVHE	0.458	0.166	0.376	0.332	0.298	0.577	0.408	0.236	0.236	0.709	0.248	3	NA
Q16671/S346L	Q16671	AMHR2	AMHR2_HUMAN	S346L	465	Catalytic-loop	-	-	IREDGsAIGDL	0.408	0.283	0.309	0.482	0.534	0.484	0.449	0.388	0.408	0.565	0.476	3	NA
Q16816/L26M	Q16816	PHKG1	PHKG1_HUMAN	L26M	37	β1	-	-	EPKEIlRGVSS	0.349	0.345	0.306	0.57	0.496	0.483	0.488	0.349	0.399	0.548	0.656	3	NA
Q16816/R36Q	Q16816	PHKG1	PHKG1_HUMAN	R36Q	48	β2	-	-	SSVVRrIHKPT	0.308	0.246	0.445	0.537	0.488	0.556	0.549	0.283	0.369	0.656	0.261	3	NA
Q16832/F773L	Q16832	DDR2	DDR2_HUMAN	F773L	591	αF	-	-	SDVWAfVTLWE	0.189	0.377	0.434	0.647	0.672	0.517	0.566	0.456	0.627	0.551	0.546	3	oncogene
Q16832/M828I	Q16832	DDR2	DDR2_HUMAN	M828I	819	αH	-	-	SVYKLmSCWRR	0.318	0.295	0.387	0.458	0.399	0.51	0.413	0.338	0.365	0.62	0.369	3	oncogene
Q16832/R839H	Q16832	DDR2	DDR2_HUMAN	R839H	832	αH/αI-loop	-	-	RDTKNrSFQEI	0.144	0.583	0.273	0.666	0.691	0.341	0.53	0.557	0.68	0.385	0.416	3	oncogene
Q2M2I8/S197C	Q2M2I8	AAK1	AAK1_HUMAN	S197C	482	A-loop	-	-	LCDFGsTNKFQ	0.195	0.388	0.417	0.792	0.747	0.575	0.699	0.43	0.628	0.587	0.544	3	NA
Q32MK0/P639L	Q32MK0	MYLK3	MYLK3_HUMAN	P639L	429	Catalytic-loop	-	-	HLDLKpNILCV	0.355	0.204	0.441	0.496	0.528	0.561	0.511	0.315	0.452	0.577	0.39	3	NA
Q32MK0/S778P	Q32MK0	MYLK3	MYLK3_HUMAN	S778P	860	C-term-αI	-	-	LPAKAsSKTRL	0.655	0.134	0.212	0.399	0.36	0.491	0.362	0.344	0.3	0.593	0.321	3	NA
Q38SD2/I1257V	Q38SD2	LRRK1	LRRK1_HUMAN	I1257V	47	β2	-	-	GSGTViRARYQ	0.725	0.128	0.147	0.232	0.185	0.431	0.175	0.21	0.226	0.636	0.246	3	NA
Q52WX2/G334R	Q52WX2	SBK1	SBK1_HUMAN	G334R	876	C-term-αI	-	-	ARKPPgRPPAA	0.765	0.095	0.14	0.207	0.259	0.446	0.204	0.216	0.194	0.676	0.18	3	NA
Q5JZY3/G790E	Q5JZY3	EPHA10	EPHAA_HUMAN	G790E	481	A-loop;DFG-motif	-	-	KISGFgGPRDR	0.416	0.201	0.383	0.484	0.587	0.525	0.459	0.324	0.42	0.641	0.34	3	NA
Q5JZY3/V645I	Q5JZY3	EPHA10	EPHAA_HUMAN	V645I	30	N-term-β1	-	neutral	LDAKSvLERSL	0.813	0.068	0.12	0.154	0.183	0.342	0.173	0.149	0.137	0.673	0.159	3	NA
Q5TCY1/R191W	Q5TCY1	TTBK1	TTBK1_HUMAN	R191W	510	A-loop	-	-	TTGDVrPRNVA	0.154	0.456	0.389	0.73	0.637	0.467	0.588	0.532	0.692	0.457	0.504	3	NA
Q5VT25/R319Q	Q5VT25	CDC42BPA	MRCKA_HUMAN	R319Q	820	αH	-	-	AKDLIrLICSR	0.801	0.045	0.155	0.158	0.16	0.481	0.236	0.15	0.104	0.698	0.127	3	NA
Q6IQ55/P144L	Q6IQ55	TTBK2	TTBK2_HUMAN	P144L	429	Catalytic-loop	-	-	HRDIKpNFAMG	0.247	0.452	0.301	0.624	0.68	0.487	0.622	0.517	0.677	0.491	0.537	3	NA
Q6J9G0/R279Q	Q6J9G0	STYK1	STYK1_HUMAN	R279Q	503	A-loop	-	-	YEVYTrAISST	0.598	0.107	0.295	0.377	0.307	0.517	0.445	0.196	0.238	0.695	0.393	3	NA
Q6PHR2/E149K	Q6PHR2	ULK3	ULK3_HUMAN	E149K	439	Catalytic-loop	-	-	LLSSLePHLKL	0.679	0.092	0.229	0.169	0.147	0.46	0.258	0.184	0.144	0.696	0.168	3	NA
Q6PHR2/M180T	Q6PHR2	ULK3	ULK3_HUMAN	M180T	541	A-loop	-	-	GSPLYmPEMVC	0.235	0.337	0.428	0.589	0.591	0.569	0.582	0.392	0.5	0.622	0.554	3	NA
Q6SA08/R147L	Q6SA08	TSSK4	TSSK4_HUMAN	R147L	424	Catalytic-loop;HrD-motif	-	-	KSIVHrLKLEN	0.226	0.351	0.423	0.656	0.617	0.501	0.572	0.416	0.577	0.483	0.42	3	NA
Q6ZN16/A800V	Q6ZN16	MAP3K15	M3K15_HUMAN	A800V	493	A-loop	-	-	TSKRLaVNPCT	0.267	0.205	0.528	0.603	0.509	0.601	0.588	0.291	0.365	0.736	0.455	3	NA
Q6ZN16/G776D	Q6ZN16	MAP3K15	M3K15_HUMAN	G776D	429	Catalytic-loop	-	-	HRDIKgNVLVN	0.105	0.545	0.35	0.762	0.739	0.433	0.654	0.528	0.738	0.461	0.573	3	NA
Q76MJ5/R636L	Q76MJ5	ERN2	ERN2_HUMAN	R636L	424	Catalytic-loop;HrD-motif	-	-	LHIVHrLKPGN	0.138	0.565	0.297	0.768	0.778	0.364	0.636	0.636	0.797	0.279	0.529	3	NA
Q86SG6/R226W	Q86SG6	NEK8	NEK8_HUMAN	R226W	705	αG/αH-loop	-	-	APISDrSPELR	0.38	0.24	0.379	0.495	0.466	0.537	0.48	0.301	0.347	0.645	0.315	3	NA
Q86UE8/S617L	Q86UE8	TLK2	TLK2_HUMAN	S617L	484	A-loop	p	decrease	TDFGLsIMDDD	0.166	0.511	0.323	0.806	0.833	0.507	0.776	0.536	0.776	0.479	0.531	3	NA
Q86UX6/H181Y	Q86UX6	STK32C	ST32C_HUMAN	H181Y	252	αD	-	-	GDLRYhQQNVQ	0.202	0.437	0.361	0.54	0.601	0.473	0.556	0.488	0.557	0.512	0.388	3	NA
Q86Y07/R230Q	Q86Y07	VRK2	VRK2_HUMAN	R230Q	584	αF	-	-	VALSRrDVEIL	0.199	0.428	0.373	0.651	0.672	0.416	0.55	0.493	0.602	0.469	0.375	3	NA
Q86YV6/A78S	Q86YV6	MYLK4	MYLK4_HUMAN	A78S	1	N-term-β1	-	-	RTSALaDIPAP	0.556	0.183	0.261	0.456	0.403	0.388	0.393	0.305	0.434	0.491	0.378	3	NA
Q86Z02/R328H	Q86Z02	HIPK1	HIPK1_HUMAN	R328H	465	Catalytic-loop	-	-	LVDPVrPYRVK	0.221	0.342	0.437	0.591	0.545	0.524	0.519	0.421	0.474	0.605	0.416	3	NA
Q86Z02/S167N	Q86Z02	HIPK1	HIPK1_HUMAN	S167N	8	N-term-β1	-	-	VTTKSsSSGEG	0.756	0.083	0.162	0.236	0.284	0.397	0.185	0.238	0.183	0.629	0.262	3	NA
Q8IU85/V192I	Q8IU85	CAMK1D	KCC1D_HUMAN	V192I	545	A-loop	-	-	YVAPEvAQKPY	0.502	0.201	0.296	0.301	0.305	0.498	0.315	0.229	0.229	0.648	0.262	3	NA
Q8IVW4/P153S	Q8IVW4	CDKL3	CDKL3_HUMAN	P153S	503	A-loop	-	-	RTLAApDIYTD	0.251	0.282	0.467	0.629	0.621	0.517	0.672	0.376	0.527	0.6	0.572	3	NA
Q8N165/G20C	Q8N165	PDIK1L	PDK1L_HUMAN	G20C	43	Gly-rich-loop;β2	-	-	GRGSYgVYEAV	0.163	0.536	0.302	0.758	0.762	0.379	0.597	0.556	0.719	0.407	0.594	3	NA
Q8N2I9/R136C	Q8N2I9	STK40	STK40_HUMAN	R136C	219	β4/β5-loop	-	-	KKMKKrCLVLD	0.284	0.229	0.487	0.594	0.525	0.585	0.531	0.31	0.474	0.641	0.417	3	NA
Q8N752/S5R	Q8N752	CSNK1A1L	KC1AL_HUMAN	S5R	19	N-term-β1	-	-	MTNNsSKAEL	0.49	0.187	0.322	0.437	0.395	0.518	0.344	0.347	0.424	0.622	0.327	3	NA
Q8NE63/R276C	Q8NE63	HIPK4	HIPK4_HUMAN	R276C	735	αG/αH-loop	-	-	AETKVrLERRK	0.279	0.369	0.351	0.578	0.519	0.45	0.513	0.454	0.449	0.501	0.386	3	NA
Q8TDR2/L505F	Q8TDR2	STK35	STK35_HUMAN	L505F	818	αH	-	-	EGIKQlKDMLA	0.306	0.263	0.43	0.455	0.386	0.496	0.422	0.329	0.34	0.617	0.376	3	NA
Q8TDX7/V285I	Q8TDX7	NEK7	NEK7_HUMAN	V285I	842	αI	-	-	EKRPDvYVYDV	0.843	0.06	0.097	0.163	0.119	0.403	0.185	0.117	0.1	0.721	0.128	3	NA
Q8TEA7/Q102R	Q8TEA7	TBCK	TBCK_HUMAN	Q102R	383	αE	-	-	AFEVLqLQYMN	0.714	0.153	0.133	0.264	0.31	0.401	0.211	0.293	0.179	0.548	0.18	3	NA
Q8TF76/P677S	Q8TF76	HASPIN	HASP_HUMAN	P677S	867	C-term-αI	-	-	KSSTIpCGLQV	0.319	0.268	0.413	0.489	0.42	0.488	0.473	0.342	0.405	0.637	0.377	3	NA
Q8WTQ7/H452Y	Q8WTQ7	GRK7	GRK7_HUMAN	H452Y	861	C-term-αI	-	-	DPRKHhFKTIN	0.629	0.188	0.183	0.329	0.362	0.502	0.347	0.239	0.349	0.63	0.205	3	NA
Q8WTQ7/T262I	Q8WTQ7	GRK7	GRK7_HUMAN	T262I	218	β4/β5-loop	-	-	AFESKtLCLVM	0.451	0.248	0.301	0.368	0.408	0.469	0.418	0.327	0.376	0.583	0.339	3	NA
Q92519/R286Q	Q92519	TRIB2	TRIB2_HUMAN	R286Q	820	αH	-	-	AKCLIrILRRE	0.468	0.189	0.343	0.328	0.318	0.522	0.385	0.222	0.238	0.687	0.196	3	NA
Q92630/T417M	Q92630	DYRK2	DYRK2_HUMAN	T417M	601	αF	-	-	LAELLtYPLLP	0.318	0.286	0.396	0.515	0.496	0.515	0.492	0.356	0.417	0.634	0.462	3	NA
Q96BR1/S390F	Q96BR1	SGK3	SGK3_HUMAN	S390F	816	αH	-	-	SLTAWsLEELL	0.354	0.302	0.344	0.503	0.458	0.407	0.456	0.413	0.453	0.533	0.425	3	NA
Q96GD4/G193E	Q96GD4	AURKB	AURKB_HUMAN	G193E	402	Catalytic-loop	-	-	LMYCHgKVIHR	0.803	0.033	0.164	0.125	0.181	0.384	0.223	0.158	0.142	0.699	0.173	3	NA
Q96GD4/R248C	Q96GD4	AURKB	AURKB_HUMAN	R248C	577	A-loop	-	-	EMIEGrHNEKV	0.37	0.236	0.393	0.492	0.44	0.475	0.458	0.335	0.417	0.619	0.324	3	NA
Q96J92/I233T	Q96J92	WNK4	WNK4_HUMAN	I233T	178	αC/β4-loop	-	-	LQHPNiRFYDS	0.154	0.597	0.249	0.717	0.674	0.324	0.531	0.629	0.701	0.319	0.598	3	NA
Q96KB5/L92F	Q96KB5	PBK	TOPK_HUMAN	L92F	159	αC/β4-loop	-	-	KILKSlHPNIV	0.324	0.24	0.435	0.539	0.458	0.567	0.559	0.4	0.366	0.607	0.59	3	NA
Q96KB5/R101H	Q96KB5	PBK	TOPK_HUMAN	R101H	183	β4	-	-	NIVGYrFTEAN	0.324	0.25	0.426	0.55	0.465	0.499	0.512	0.313	0.397	0.613	0.391	3	NA
Q96PY6/A115V	Q96PY6	NEK1	NEK1_HUMAN	A115V	384	αE	-	-	VQICLaKHVHD	0.172	0.503	0.325	0.676	0.676	0.421	0.556	0.536	0.597	0.429	0.477	3	NA
Q96PY6/L106F	Q96PY6	NEK1	NEK1_HUMAN	L106F	372	αE	-	-	QEDQIlWFVQI	0.476	0.246	0.277	0.325	0.278	0.41	0.311	0.278	0.275	0.613	0.282	3	NA
Q96RR4/A289V	Q96RR4	CAMKK2	KKCC2_HUMAN	A289V	371	αE	-	-	LSEDQaFYFQD	0.352	0.26	0.387	0.449	0.395	0.484	0.413	0.331	0.32	0.641	0.338	3	NA
Q99558/E392K	Q99558	MAP3K14	M3K14_HUMAN	E392K	18	N-term-β1	-	-	KPVDYeREEVH	0.27	0.371	0.359	0.598	0.526	0.539	0.517	0.409	0.486	0.578	0.436	3	NA
Q99558/H640N	Q99558	MAP3K14	M3K14_HUMAN	H640N	829	αH/αI-loop	-	-	RKEPIhVSAAE	0.598	0.137	0.265	0.262	0.228	0.482	0.297	0.231	0.228	0.67	0.242	3	NA
Q99570/I149M	Q99570	PIK3R4	PI3R4_HUMAN	I149M	427	Catalytic-loop	-	-	VRHGDiTENVM	0.361	0.318	0.321	0.534	0.48	0.446	0.408	0.386	0.457	0.483	0.405	3	NA
Q99640/D98H	Q99640	PKMYT1	PMYT1_HUMAN	D98H	19	N-term-β1	-	-	QSPGYdSRPES	0.34	0.244	0.416	0.602	0.424	0.596	0.507	0.287	0.448	0.669	0.453	3	NA
Q99683/E710K	Q99683	MAP3K5	M3K5_HUMAN	E710K	97	β3	-	-	RIAIKePERDS	0.191	0.36	0.449	0.702	0.681	0.495	0.606	0.463	0.636	0.559	0.509	3	NA
Q9BXA7/A50T	Q9BXA7	TSSK1B	TSSK1_HUMAN	A50T	119	αC	-	-	RKKAPaFLEKF	0.903	0.031	0.067	0.106	0.122	0.31	0.146	0.14	0.1	0.661	0.098	3	NA
Q9BYP7/L201H	Q9BYP7	WNK3	WNK3_HUMAN	L201H	159	αC/β4-loop	-	-	EMLKGlHPNIV	0.161	0.587	0.251	0.773	0.653	0.379	0.611	0.629	0.726	0.334	0.738	3	NA
Q9H2X6/T273K	Q9H2X6	HIPK2	HIPK2_HUMAN	T273K	227	β4/β5-loop	-	-	QHKNHtLVFEM	0.226	0.373	0.4	0.674	0.605	0.424	0.54	0.509	0.585	0.505	0.502	3	NA
Q9NR20/D171Y	Q9NR20	DYRK4	DYRK4_HUMAN	D171Y	184	β4	-	-	VVHMKdFYFRN	0.154	0.55	0.296	0.736	0.696	0.354	0.546	0.563	0.743	0.36	0.528	3	NA
Q9NRP7/G39W	Q9NRP7	STK36	STK36_HUMAN	G39W	111	β3/αC-loop	-	-	FIPKLgSEKEL	0.235	0.431	0.333	0.661	0.65	0.402	0.533	0.526	0.618	0.471	0.582	3	NA
Q9NRP7/R240W	Q9NRP7	STK36	STK36_HUMAN	R240W	828	αH/αI-loop	-	-	LTKDPrRLSWP	0.381	0.273	0.346	0.415	0.44	0.417	0.445	0.388	0.369	0.59	0.328	3	NA
Q9NRP7/S69C	Q9NRP7	STK36	STK36_HUMAN	S69C	185	β4	-	-	VHMLDsETDKE	0.367	0.224	0.409	0.381	0.312	0.527	0.404	0.288	0.316	0.681	0.315	3	NA
Q9NYV4/D918G	Q9NYV4	CDK12	CDK12_HUMAN	D918G	587	αF	-	-	YTPAIdWSCGC	0.114	0.738	0.148	0.779	0.718	0.163	0.556	0.696	0.782	0.181	0.614	3	TSG
Q9NYV4/G923V	Q9NYV4	CDK12	CDK12_HUMAN	G923V	592	αF	-	-	DVWSCgILGEL	0.236	0.589	0.176	0.645	0.646	0.263	0.529	0.631	0.662	0.252	0.522	3	TSG
Q9NYV4/K756T	Q9NYV4	CDK12	CDK12_HUMAN	K756T	96	β3;Catalytic-Lys	-	-	ELVALkVRLDN	0.003	0.996	0.001	0.987	0.98	0.012	0.661	0.991	0.986	0.019	0.556	3	TSG
Q9NYY3/V176L	Q9NYY3	PLK2	PLK2_HUMAN	V176L	358	αD/αE-loop	-	-	LKARKvTEPEV	0.721	0.11	0.169	0.253	0.165	0.452	0.217	0.25	0.192	0.636	0.191	3	NA
Q9NZJ5/T970M	Q9NZJ5	EIF2AK3	E2AK3_HUMAN	T970M	510	A-loop	-	-	DEEEQtLTPMP	0.779	0.123	0.098	0.272	0.217	0.408	0.283	0.227	0.2	0.682	0.201	3	NA
Q9P286/D579N	Q9P286	PAK5	PAK5_HUMAN	D579N	463	Catalytic-loop	-	-	ILLTSdRIKLS	0.462	0.186	0.352	0.329	0.37	0.497	0.398	0.259	0.25	0.61	0.313	3	NA
Q9P286/E684K	Q9P286	PAK5	PAK5_HUMAN	E684K	826	αH/αI-loop	-	-	LMLVReSQRAT	0.588	0.132	0.281	0.263	0.222	0.556	0.262	0.21	0.205	0.724	0.22	3	NA
Q9P286/G443E	Q9P286	PAK5	PAK5_HUMAN	G443E	20	N-term-β1	-	-	LVVSPgPREYL	0.198	0.303	0.499	0.613	0.641	0.58	0.664	0.351	0.572	0.675	0.534	3	NA
Q9P286/M509I	Q9P286	PAK5	PAK5_HUMAN	M509I	182	β4	-	-	DNVVDmSSYLV	0.236	0.257	0.507	0.611	0.616	0.691	0.653	0.329	0.477	0.704	0.491	3	NA
Q9P286/P698S	Q9P286	PAK5	PAK5_HUMAN	P698S	850	αI	-	-	ELLGHpLKLAG	0.3	0.306	0.393	0.465	0.445	0.493	0.471	0.383	0.382	0.563	0.425	3	NA
Q9P286/R674Q	Q9P286	PAK5	PAK5_HUMAN	R674Q	814	αH	-	-	VSSVLrFLDLM	0.775	0.106	0.119	0.126	0.17	0.433	0.165	0.175	0.126	0.698	0.08	3	NA
Q9P286/V440A	Q9P286	PAK5	PAK5_HUMAN	V440A	17	N-term-β1	-	-	ALQLVvPGDPR	0.167	0.506	0.326	0.708	0.649	0.456	0.594	0.571	0.676	0.528	0.548	3	NA
Q9P289/E127K	Q9P289	STK26	STK26_HUMAN	E127K	380	αE	-	-	ATMLKeLKGLD	0.193	0.403	0.403	0.607	0.597	0.497	0.535	0.47	0.627	0.564	0.511	3	NA
Q9UEE5/Q344H	Q9UEE5	STK17A	ST17A_HUMAN	Q344H	875	C-term-αI	-	-	EANALqGHSVP	0.686	0.124	0.189	0.252	0.202	0.46	0.275	0.178	0.191	0.715	0.223	3	NA
Q9UEW8/P278L	Q9UEW8	STK39	STK39_HUMAN	P278L	638	αG	-	-	YHKYPpKVLML	0.223	0.467	0.31	0.645	0.618	0.427	0.589	0.554	0.618	0.418	0.493	3	NA
Q9UIK4/S44N	Q9UIK4	DAPK2	DAPK2_HUMAN	S44N	76	β2/β3-loop	-	-	KCREKsGLEYA	0.613	0.163	0.224	0.325	0.341	0.465	0.336	0.356	0.271	0.562	0.217	3	NA
Q9UK32/S661F	Q9UK32	RPS6KA6	KS6A6_HUMAN	S661F	820	αH	-	-	AKDLLsMLHMD	0.363	0.242	0.395	0.517	0.435	0.463	0.485	0.395	0.43	0.598	0.363	3	NA
Q9UM73/G1304E	Q9UM73	ALK	ALK_HUMAN	G1304E	549	A-loop	-	-	EAFMEgFTSKT	0.239	0.41	0.351	0.531	0.555	0.495	0.508	0.461	0.543	0.549	0.466	3	oncogene, fusion
Q9UM73/L1240V	Q9UM73	ALK	ALK_HUMAN	L1240V	391	αE	-	-	CGCQYlENHFI	0.185	0.481	0.334	0.722	0.668	0.447	0.575	0.502	0.581	0.534	0.714	3	oncogene, fusion
Q9UM73/P1215T	Q9UM73	ALK	ALK_HUMAN	P1215T	352	αD/αE-loop	-	-	ETRPRpQPSSL	0.488	0.17	0.342	0.255	0.221	0.517	0.323	0.197	0.158	0.675	0.276	3	oncogene, fusion
Q9UQM7/R220C	Q9UQM7	CAMK2A	KCC2A_HUMAN	R220C	642	αG	-	-	DEDQHrYQQIK	0.245	0.361	0.394	0.563	0.58	0.48	0.546	0.478	0.547	0.543	0.373	3	NA
Q9Y243/D282N	Q9Y243	AKT3	AKT3_HUMAN	D282N	463	Catalytic-loop	-	-	LMLDKdHIKIT	0.297	0.234	0.469	0.491	0.503	0.493	0.502	0.373	0.442	0.581	0.434	3	oncogene
Q9Y243/E295Q	Q9Y243	AKT3	AKT3_HUMAN	E295Q	489	A-loop	-	-	FGLCKeITDAA	0.211	0.23	0.56	0.63	0.565	0.514	0.567	0.343	0.45	0.646	0.495	3	oncogene
Q9Y243/K172Q	Q9Y243	AKT3	AKT3_HUMAN	K172Q	87	β2/β3-loop	-	-	EKASGkYAMKI	0.794	0.098	0.108	0.219	0.22	0.455	0.184	0.219	0.192	0.584	0.132	3	oncogene
Q9Y2K2/R82L	Q9Y2K2	SIK3	SIK3_HUMAN	R82L	48	β2	-	-	FAVVKrTHLVT	0.759	0.072	0.169	0.233	0.266	0.495	0.343	0.163	0.209	0.694	0.181	3	NA
Q9Y2U5/A454T	Q9Y2U5	MAP3K2	M3K2_HUMAN	A454T	358	αD/αE-loop	-	-	LKAYGaTENVT	0.7	0.103	0.197	0.206	0.204	0.471	0.237	0.177	0.182	0.632	0.191	3	NA
Q9Y616/L403I	Q9Y616	IRAK3	IRAK3_HUMAN	L403I	676	αG/αH-loop	-	-	SCLSFlKKVPP	0.76	0.085	0.155	0.179	0.144	0.394	0.191	0.205	0.129	0.609	0.242	3	NA
Q9Y616/R429W	Q9Y616	IRAK3	IRAK3_HUMAN	R429W	826	αH/αI-loop	-	-	RCAATrKLRPS	0.242	0.307	0.451	0.581	0.553	0.552	0.55	0.41	0.451	0.61	0.411	3	NA
Q9Y616/S332T	Q9Y616	IRAK3	IRAK3_HUMAN	S332T	526	A-loop	-	-	TINMTsSSKHL	0.747	0.093	0.159	0.287	0.246	0.41	0.289	0.291	0.21	0.609	0.142	3	NA
Q9Y6R4/M1495I	Q9Y6R4	MAP3K4	M3K4_HUMAN	M1495I	509	A-loop	-	-	NNAQTmGEVNS	0.323	0.275	0.402	0.532	0.527	0.484	0.498	0.338	0.407	0.531	0.459	3	NA
Q9Y6S9/G376V	Q9Y6S9	RPS6KL1	RPKL1_HUMAN	G376V	24	N-term-β1	-	-	DGAGRgGRATW	0.393	0.258	0.349	0.396	0.343	0.434	0.426	0.28	0.255	0.61	0.246	3	NA
Q9Y6S9/G424C	Q9Y6S9	RPS6KL1	RPKL1_HUMAN	G424C	464	Catalytic-loop	-	-	LLDQAgIRLTY	0.191	0.451	0.357	0.684	0.675	0.413	0.593	0.487	0.633	0.473	0.56	3	NA
O00141/P73S	O00141	SGK1	SGK1_HUMAN	P73S	6	N-term-β1	-	-	LMNANpPPPSP	0.746	0.13	0.124	0.268	0.283	0.436	0.29	0.243	0.204	0.67	0.165	3	oncogene
O00141/P77S	O00141	SGK1	SGK1_HUMAN	P77S	10	N-term-β1	-	-	NPSPPpPSQQI	0.767	0.094	0.139	0.268	0.313	0.417	0.337	0.215	0.196	0.682	0.176	3	oncogene
O00311/S150F	O00311	CDC7	CDC7_HUMAN	S150F	365	αD/αE-loop	-	-	ILNSLsQEVRE	0.352	0.288	0.359	0.525	0.47	0.395	0.465	0.43	0.444	0.53	0.426	3	NA
O00311/T68N	O00311	CDC7	CDC7_HUMAN	T68N	41	Gly-rich-loop;β1/β2-loop	-	-	KIGEGtSSVYL	0.152	0.56	0.288	0.711	0.75	0.33	0.595	0.583	0.732	0.417	0.517	3	NA
O14578/A304T	O14578	CIT	CTRO_HUMAN	A304T	631	αF/αG-loop	-	-	GRSPFaGTSAR	0.894	0.053	0.054	0.126	0.151	0.345	0.144	0.14	0.124	0.665	0.102	3	NA
O14578/V111G	O14578	CIT	CTRO_HUMAN	V111G	46	β2	-	-	GHFAEvVVREK	0.206	0.535	0.259	0.731	0.653	0.409	0.58	0.572	0.628	0.45	0.605	3	NA
O14733/T327M	O14733	MAP2K7	MP2K7_HUMAN	T327M	660	αG	-	-	YKNCKtFEVLT	0.287	0.307	0.406	0.522	0.506	0.507	0.557	0.449	0.486	0.6	0.455	3	NA
O14920/K171R	O14920	IKBKB	IKKB_HUMAN	K171R	485	A-loop	ub	-	DLGYAkLDQGS	0.267	0.373	0.36	0.602	0.678	0.533	0.607	0.456	0.656	0.553	0.298	3	oncogene
O14936/R28Q	O14936	CASK	CSKP_HUMAN	R28Q	48	β2	-	-	FSVVRrINRET	0.647	0.106	0.247	0.262	0.307	0.526	0.371	0.239	0.237	0.656	0.176	3	NA
O15111/V155A	O15111	CHUK	IKKA_HUMAN	V155A	463	Catalytic-loop	-	neutral	IVLQDvGKIIH	0.811	0.071	0.118	0.141	0.181	0.458	0.211	0.187	0.161	0.606	0.146	3	NA
O15146/A763T	O15146	MUSK	MUSK_HUMAN	A763T	530	A-loop	-	-	ANENDaPIRWM	0.542	0.253	0.205	0.496	0.487	0.278	0.393	0.466	0.446	0.407	0.237	3	NA
O43187/E251K	O43187	IRAK2	IRAK2_HUMAN	E251K	143	αC	-	-	SPGSIeFFQAE	0.669	0.118	0.213	0.252	0.231	0.491	0.253	0.214	0.156	0.653	0.228	3	NA
O43353/E186K	O43353	RIPK2	RIPK2_HUMAN	E186K	529	A-loop	-	-	SKSAPeGTIIY	0.408	0.25	0.343	0.709	0.721	0.483	0.601	0.426	0.694	0.498	0.344	3	NA
O43781/R281Q	O43781	DYRK3	DYRK3_HUMAN	R281Q	217	β4/β5-loop	-	-	ESFTFrHVCMA	0.255	0.343	0.401	0.611	0.597	0.509	0.544	0.423	0.544	0.641	0.371	3	NA
O43781/R468C	O43781	DYRK3	DYRK3_HUMAN	R468C	778	αG/αH-loop	-	-	VLVGGrRRGKK	0.34	0.276	0.384	0.504	0.487	0.487	0.465	0.36	0.42	0.604	0.382	3	NA
O60307/G450S	O60307	MAST3	MAST3_HUMAN	G450S	240	β5/αD-loop	-	-	EYVEGgCATLL	0.145	0.392	0.463	0.733	0.688	0.528	0.632	0.496	0.63	0.537	0.758	3	NA
O60307/V578M	O60307	MAST3	MAST3_HUMAN	V578M	608	αF/αG-loop	-	-	FLVGCvFFGDT	0.335	0.268	0.398	0.536	0.502	0.519	0.484	0.415	0.486	0.649	0.438	3	NA
O60674/H671Y	O60674	JAK2	JAK2_HUMAN	H671Y	423	Catalytic-loop;HrD-motif	-	-	ENTLIhNVCAK	0.211	0.43	0.359	0.602	0.633	0.469	0.562	0.485	0.548	0.466	0.464	3	oncogene, fusion
O60674/R1122Q	O60674	JAK2	JAK2_HUMAN	R1122Q	852	αI	-	-	RDLALrDQIRD	0.843	0.038	0.119	0.134	0.141	0.437	0.166	0.137	0.099	0.699	0.091	3	oncogene, fusion
O75582/R441Q	O75582	RPS6KA5	KS6A5_HUMAN	R441Q	47	β2	-	-	SFSICrCVHKK	0.323	0.325	0.351	0.492	0.48	0.483	0.396	0.377	0.452	0.593	0.355	3	NA
O75676/E34K	O75676	RPS6KA4	KS6A4_HUMAN	E34K	32	β1	-	-	SVENFeLKVLG	0.399	0.263	0.338	0.399	0.379	0.481	0.392	0.342	0.341	0.565	0.299	3	NA
O75676/E645K	O75676	RPS6KA4	KS6A4_HUMAN	E645K	806	αH	-	-	WQGVSeAKELV	0.836	0.064	0.1	0.153	0.148	0.447	0.177	0.148	0.164	0.688	0.152	3	NA
O75676/P559L	O75676	RPS6KA4	KS6A4_HUMAN	P559L	493	A-loop	-	-	FARLRpSPGVP	0.274	0.318	0.408	0.56	0.601	0.608	0.589	0.343	0.577	0.588	0.594	3	NA
O75914/E334K	O75914	PAK3	PAK3_HUMAN	E334K	156	αC/β4-loop	-	-	ILVMReKNPNI	0.314	0.265	0.421	0.479	0.416	0.561	0.499	0.261	0.326	0.696	0.43	3	NA
O76039/E98K	O76039	CDKL5	CDKL5_HUMAN	E98K	250	αD	-	-	EKNMLeLEEMP	0.534	0.177	0.289	0.384	0.322	0.481	0.344	0.277	0.27	0.612	0.357	3	NA
O76039/P231S	O76039	CDKL5	CDKL5_HUMAN	P231S	688	αG/αH-loop	-	-	VLGPLpEQMKL	0.501	0.177	0.322	0.368	0.343	0.489	0.396	0.236	0.286	0.662	0.283	3	NA
O94921/R425Q	O94921	CDK14	CDK14_HUMAN	R425Q	858	αI	-	-	SDLPPrWELTD	0.904	0.024	0.071	0.131	0.13	0.457	0.201	0.124	0.091	0.726	0.111	3	NA
O95747/V147L	O95747	OXSR1	OXSR1_HUMAN	V147L	427	Catalytic-loop	-	-	QIHRDvAGNIL	0.757	0.083	0.159	0.214	0.218	0.386	0.219	0.227	0.182	0.594	0.186	3	NA
O95835/E817K	O95835	LATS1	LATS1_HUMAN	E817K	389	αE	-	-	LTCAVeVHKMG	0.296	0.252	0.452	0.552	0.489	0.523	0.533	0.37	0.45	0.607	0.419	3	TSG
O96013/A573S	O96013	PAK4	PAK4_HUMAN	A573S	853	αI	-	-	KHPFLaAGPPA	0.895	0.025	0.08	0.1	0.103	0.399	0.165	0.115	0.067	0.712	0.109	3	NA
O96013/T478M	O96013	PAK4	PAK4_HUMAN	T478M	536	A-loop	p	-	KSLVGtYWMAP	0.082	0.769	0.15	0.874	0.854	0.278	0.71	0.808	0.892	0.228	0.556	3	NA
O96017/S428F	O96017	CHEK2	CHK2_HUMAN	S428F	631	αF/αG-loop	-	-	GYPPFsHRTQV	0.49	0.247	0.263	0.364	0.339	0.462	0.403	0.316	0.356	0.611	0.256	3	TSG
P00519/R516C	P00519	ABL1	ABL1_HUMAN	R516C	874	C-term-αI	-	-	GKQGVrAVSTL	0.648	0.143	0.209	0.233	0.252	0.498	0.318	0.211	0.203	0.675	0.193	3	oncogene, fusion
P00519/T277I	P00519	ABL1	ABL1_HUMAN	T277I	114	β3/αC-loop	-	-	TLKEDtEVEEF	0.261	0.341	0.398	0.533	0.546	0.491	0.549	0.385	0.434	0.602	0.512	3	oncogene, fusion
P00533/E868G	P00533	EGFR	EGFR_HUMAN	E868G	508	A-loop	-	-	GAEEKeHAEGG	0.233	0.402	0.365	0.705	0.655	0.534	0.681	0.49	0.67	0.546	0.505	3	oncogene
P00533/K714N	P00533	EGFR	EGFR_HUMAN	K714N	33	β1	ub	-	ETEFKkKVLGS	0.255	0.31	0.434	0.557	0.521	0.519	0.556	0.349	0.427	0.601	0.233	3	oncogene
P00533/R836H	P00533	EGFR	EGFR_HUMAN	R836H	424	Catalytic-loop;HrD-motif	-	-	RRLVHrLAARN	0.283	0.344	0.373	0.597	0.59	0.486	0.497	0.41	0.592	0.487	0.347	3	oncogene
P00533/R932H	P00533	EGFR	EGFR_HUMAN	R932H	664	αG/αH-loop	-	-	LEKGErPQPPI	0.21	0.44	0.35	0.64	0.602	0.471	0.546	0.479	0.536	0.515	0.445	3	oncogene
P00533/Y869C	P00533	EGFR	EGFR_HUMAN	Y869C	524	A-loop	p	-	AEEKEyAEGGK	0.118	0.518	0.364	0.782	0.804	0.444	0.73	0.571	0.764	0.406	0.583	3	oncogene
P00540/R126H	P00540	MOS	MOS_HUMAN	R126H	189	β4/β5-loop	-	-	VAASTrPAGSN	0.909	0.035	0.057	0.086	0.086	0.403	0.141	0.098	0.077	0.711	0.071	3	NA
P00540/S99Y	P00540	MOS	MOS_HUMAN	S99Y	122	αC	-	-	KNRLAsRSFWA	0.519	0.18	0.301	0.32	0.284	0.542	0.333	0.238	0.241	0.712	0.237	3	NA
P04049/D381N	P04049	RAF1	RAF1_HUMAN	D381N	111	β3/αC-loop	-	-	ILKVVdTPEQF	0.793	0.108	0.099	0.272	0.187	0.36	0.172	0.231	0.193	0.586	0.21	3	oncogene, fusion
P04049/R618L	P04049	RAF1	RAF1_HUMAN	R618L	863	C-term-αI	-	-	LPKINrASEPS	0.242	0.313	0.445	0.627	0.61	0.535	0.606	0.425	0.577	0.572	0.432	3	oncogene, fusion
P04626/G776S	P04626	ERBB2	ERBB2_HUMAN	G776S	156	αC/β4-loop	-	-	AYVMAgGSPYV	0.694	0.118	0.188	0.305	0.275	0.537	0.311	0.188	0.223	0.718	0.288	3	oncogene, fusion
P04626/Q902H	P04626	ERBB2	ERBB2_HUMAN	Q902H	584	αF	-	-	RRFTHqDVWSY	0.395	0.251	0.354	0.379	0.373	0.496	0.385	0.275	0.28	0.582	0.303	3	oncogene, fusion
P04626/R896C	P04626	ERBB2	ERBB2_HUMAN	R896C	548	A-loop	-	-	LESILrRFTHQ	0.486	0.209	0.305	0.354	0.32	0.475	0.341	0.278	0.277	0.635	0.199	3	oncogene, fusion
P04626/R897G	P04626	ERBB2	ERBB2_HUMAN	R897G	549	A-loop	-	-	ESILRrFTHQS	0.244	0.332	0.424	0.573	0.577	0.498	0.551	0.381	0.537	0.587	0.385	3	oncogene, fusion
P04629/D709N	P04629	NTRK1	NTRK1_HUMAN	D709N	587	αF	-	-	FTTESdWSFGV	0.203	0.52	0.278	0.672	0.648	0.347	0.53	0.543	0.617	0.364	0.559	3	oncogene, TSG, fusion
P04629/G517V	P04629	NTRK1	NTRK1_HUMAN	G517V	38	β1;Gly-rich-loop	-	-	LKWELgGAFGK	0.111	0.53	0.359	0.792	0.753	0.372	0.588	0.59	0.723	0.415	0.65	3	oncogene, TSG, fusion
P04629/K544E	P04629	NTRK1	NTRK1_HUMAN	K544E	96	β3;Catalytic-Lys	-	-	MLVAVkLKEAS	0.003	0.996	0.002	0.996	0.986	0.015	0.695	0.99	0.996	0.033	0.567	3	oncogene, TSG, fusion
P04629/P695S	P04629	NTRK1	NTRK1_HUMAN	P695S	542	A-loop;APE-motif	-	-	PIRWMpESILY	0.315	0.259	0.427	0.565	0.502	0.511	0.507	0.397	0.464	0.61	0.422	3	oncogene, TSG, fusion
P04629/R649W	P04629	NTRK1	NTRK1_HUMAN	R649W	424	Catalytic-loop;HrD-motif	-	decrease	LHFVHrLATRN	0.101	0.619	0.28	0.784	0.818	0.358	0.659	0.663	0.837	0.333	0.523	3	oncogene, TSG, fusion
P04629/R780W	P04629	NTRK1	NTRK1_HUMAN	R780W	849	αI	-	-	KDVHArQALAQ	0.306	0.297	0.397	0.486	0.45	0.436	0.443	0.434	0.421	0.555	0.365	3	oncogene, TSG, fusion
P04629/V502A	P04629	NTRK1	NTRK1_HUMAN	V502A	21	N-term-β1	-	-	FSDACvHIKRR	0.314	0.308	0.379	0.596	0.567	0.482	0.512	0.368	0.48	0.582	0.428	3	oncogene, TSG, fusion
P06213/G1080A	P06213	INSR	INSR_HUMAN	G1080A	156	αC/β4-loop	-	-	ASVMKgTCHHV	0.737	0.119	0.144	0.259	0.284	0.453	0.317	0.232	0.218	0.684	0.26	3	NA
P06213/P1130L	P06213	INSR	INSR_HUMAN	P1130L	358	αD/αE-loop	-	-	NPGRPpTLQEM	0.397	0.313	0.29	0.562	0.503	0.497	0.43	0.443	0.486	0.538	0.483	3	NA
P06213/P1299L	P06213	INSR	INSR_HUMAN	P1299L	859	C-term-αI	-	-	LHPSFpVSFFH	0.72	0.1	0.18	0.323	0.312	0.515	0.34	0.239	0.184	0.673	0.253	3	NA
P06213/R1270H	P06213	INSR	INSR_HUMAN	R1270H	820	αH	-	-	VTDLMrCWQFN	0.895	0.048	0.056	0.128	0.132	0.432	0.166	0.135	0.094	0.677	0.106	3	NA
P06213/T1099M	P06213	INSR	INSR_HUMAN	T1099M	227	β4/β5-loop	-	-	SKGQPtVVMEL	0.35	0.243	0.406	0.477	0.423	0.502	0.496	0.3	0.345	0.651	0.348	3	NA
P06239/E468K	P06239	LCK	LCK_HUMAN	E468K	812	αH	-	-	DNCPEeYQLMR	0.614	0.133	0.252	0.254	0.231	0.513	0.31	0.218	0.245	0.646	0.3	3	oncogene, fusion
P06241/D506E	P06241	FYN	FYN_HUMAN	D506E	826	αH/αI-loop	-	neutral	HCWKKdEERPT	0.792	0.046	0.162	0.165	0.182	0.467	0.263	0.14	0.112	0.693	0.212	3	NA
P06241/E309K	P06241	FYN	FYN_HUMAN	E309K	144	αC	-	-	GTMSPeFLEEA	0.872	0.041	0.087	0.158	0.138	0.378	0.144	0.186	0.123	0.668	0.166	3	NA
P07332/A788V	P07332	FES	FES_HUMAN	A788V	812	αH	-	-	ELCPDaFRLME	0.828	0.069	0.103	0.119	0.145	0.451	0.173	0.16	0.134	0.678	0.149	3	oncogene, TSG
P07333/G936S	P07333	CSF1R	CSF1R_HUMAN	G936S	876	C-term-αI	-	-	RSGGSgSSSEL	0.814	0.076	0.11	0.19	0.237	0.389	0.191	0.218	0.181	0.659	0.17	3	oncogene
P07948/E435K	P07948	LYN	LYN_HUMAN	E435K	597	αF	-	-	GILLYeVTYGK	0.147	0.565	0.288	0.704	0.666	0.365	0.562	0.594	0.732	0.411	0.549	3	oncogene, fusion
P07948/R244Q	P07948	LYN	LYN_HUMAN	R244Q	28	N-term-β1	-	-	AWEIPrSIKLV	0.281	0.264	0.455	0.606	0.594	0.556	0.614	0.372	0.485	0.592	0.38	3	oncogene, fusion
P07949/A750V	P07949	RET	RET_HUMAN	A750V	76	β2/β3-loop	-	-	HLKGRaYTTVA	0.486	0.242	0.272	0.315	0.297	0.483	0.326	0.366	0.282	0.582	0.237	3	oncogene, fusion
P07949/E884K	P07949	RET	RET_HUMAN	E884K	439	Catalytic-loop	-	-	NILVAeRKMKI	0.47	0.195	0.335	0.381	0.311	0.533	0.363	0.278	0.331	0.664	0.294	3	oncogene, fusion
P07949/E901K	P07949	RET	RET_HUMAN	E901K	499	A-loop	-	-	SRDVYeDSYVK	0.336	0.308	0.356	0.555	0.541	0.533	0.451	0.389	0.419	0.566	0.491	3	oncogene, fusion
P07949/G1032D	P07949	RET	RET_HUMAN	G1032D	877	C-term-αI	-	-	LIYDDgSEEET	0.164	0.407	0.429	0.677	0.656	0.544	0.625	0.452	0.634	0.573	0.568	3	oncogene, fusion
P07949/G894S	P07949	RET	RET_HUMAN	G894S	481	A-loop;DFG-motif	-	activating	KISDFgSRDVY	0.085	0.329	0.586	0.793	0.845	0.604	0.758	0.477	0.805	0.595	0.65	3	oncogene, fusion
P07949/R886W	P07949	RET	RET_HUMAN	R886W	473	Catalytic-loop	-	-	LVAEGrMKISD	0.241	0.297	0.462	0.619	0.587	0.508	0.607	0.396	0.491	0.541	0.381	3	oncogene, fusion
P07949/R912W	P07949	RET	RET_HUMAN	R912W	530	A-loop	-	-	KRSQGrPVKWM	0.145	0.624	0.23	0.801	0.769	0.306	0.667	0.629	0.805	0.284	0.481	3	oncogene, fusion
P08581/M1192I	P08581	MET	MET_HUMAN	M1192I	385	αE	-	-	QVAKGmYLASK	0.185	0.482	0.333	0.648	0.684	0.419	0.561	0.559	0.642	0.427	0.472	3	oncogene
P08581/V1271M	P08581	MET	MET_HUMAN	V1271M	593	αF	-	-	VWSFGvLWELM	0.402	0.31	0.288	0.505	0.491	0.444	0.393	0.468	0.473	0.482	0.422	3	oncogene
P08631/T412M	P08631	HCK	HCK_HUMAN	T412M	524	A-loop	p	-	EDNEYtREGAK	0.193	0.459	0.348	0.607	0.586	0.387	0.57	0.432	0.575	0.46	0.319	3	NA
P08922/E2120K	P08922	ROS1	ROS1_HUMAN	E2120K	528	A-loop	-	-	YRKRGeLLPVR	0.149	0.548	0.303	0.719	0.77	0.447	0.67	0.554	0.691	0.483	0.445	3	oncogene, fusion
P08922/E2241K	P08922	ROS1	ROS1_HUMAN	E2241K	876	C-term-αI	-	-	SGVINeFEGED	0.81	0.107	0.083	0.23	0.21	0.412	0.189	0.27	0.182	0.623	0.145	3	oncogene, fusion
P08922/G2136R	P08922	ROS1	ROS1_HUMAN	G2136R	549	A-loop	-	-	ESLMDgFTTQS	0.22	0.474	0.305	0.65	0.615	0.353	0.542	0.546	0.64	0.424	0.535	3	oncogene, fusion
P08922/P2049L	P08922	ROS1	ROS1_HUMAN	P2049L	357	αD/αE-loop	-	-	ATFYGpLTLVD	0.344	0.352	0.304	0.55	0.512	0.504	0.479	0.4	0.467	0.605	0.427	3	oncogene, fusion
P08922/R2230K	P08922	ROS1	ROS1_HUMAN	R2230K	865	C-term-αI	-	-	SIYKSrEANNS	0.879	0.055	0.066	0.19	0.163	0.378	0.189	0.172	0.124	0.694	0.135	3	oncogene, fusion
P09769/R465W	P09769	FGR	FGR_HUMAN	R465W	639	αG	-	-	PGMNKrVLEQV	0.358	0.32	0.322	0.498	0.443	0.452	0.4	0.411	0.421	0.555	0.331	3	NA
P0C1S8/S476F	P0C1S8	WEE2	WEE2_HUMAN	S476F	834	αI	-	-	AEQRPsAALAR	0.202	0.549	0.249	0.713	0.742	0.351	0.631	0.599	0.637	0.415	0.534	3	NA
P10721/D572Y	P10721	KIT	KIT_HUMAN	D572Y	14	N-term-β1	-	-	NYVYIdTQLPY	0.208	0.383	0.409	0.666	0.675	0.496	0.613	0.46	0.697	0.519	0.55	3	oncogene
P10721/D820A	P10721	KIT	KIT_HUMAN	D820A	503	A-loop	-	-	RDIKNdNYVVK	0.251	0.42	0.329	0.705	0.639	0.555	0.704	0.412	0.638	0.553	0.665	3	oncogene
P10721/G565R	P10721	KIT	KIT_HUMAN	G565R	7	N-term-β1	-	-	VEEINgNYVYI	0.231	0.402	0.367	0.648	0.541	0.502	0.566	0.452	0.506	0.593	0.501	3	oncogene
P10721/L647F	P10721	KIT	KIT_HUMAN	L647F	159	αC/β4-loop	-	-	KVLSYlNHMNI	0.316	0.223	0.461	0.507	0.446	0.552	0.538	0.301	0.359	0.637	0.523	3	oncogene
P10721/R796G	P10721	KIT	KIT_HUMAN	R796G	430	Catalytic-loop	-	-	RDLAArILLTH	0.125	0.675	0.2	0.785	0.795	0.334	0.585	0.677	0.857	0.261	0.537	3	oncogene
P10721/R888W	P10721	KIT	KIT_HUMAN	R888W	664	αG/αH-loop	-	-	IKEGFrLSPEH	0.145	0.564	0.291	0.746	0.731	0.343	0.565	0.609	0.719	0.381	0.46	3	oncogene
P10721/S692L	P10721	KIT	KIT_HUMAN	S692L	263	αD/αE-loop	-	-	DSFICsQEDHA	0.705	0.098	0.197	0.173	0.199	0.524	0.329	0.185	0.166	0.69	0.166	3	oncogene
P11362/R475Q	P11362	FGFR1	FGFR1_HUMAN	R475Q	27	N-term-β1	-	-	RWELPrRLVLG	0.199	0.37	0.43	0.668	0.651	0.539	0.622	0.45	0.622	0.647	0.398	3	oncogene, fusion
P14616/M1092I	P14616	INSRR	INSRR_HUMAN	M1092I	371	αE	-	-	PALGEmQMAGE	0.416	0.187	0.397	0.398	0.359	0.526	0.404	0.24	0.259	0.672	0.316	3	NA
P14616/R1147H	P14616	INSRR	INSRR_HUMAN	R1147H	524	A-loop	-	-	ETDYYrGGKGL	0.222	0.422	0.356	0.598	0.587	0.423	0.506	0.426	0.519	0.477	0.405	3	NA
P14616/V1156M	P14616	INSRR	INSRR_HUMAN	V1156M	538	A-loop	-	-	KGLLPvWMAPE	0.307	0.377	0.315	0.555	0.513	0.416	0.535	0.451	0.507	0.497	0.476	3	NA
P15056/A712T	P15056	BRAF	BRAF_HUMAN	A712T	848	αI	-	-	FPQILaIELLA	0.866	0.055	0.079	0.121	0.133	0.461	0.156	0.163	0.112	0.645	0.103	3	oncogene, fusion
P15056/E695K	P15056	BRAF	BRAF_HUMAN	E695K	821	αH	-	-	KRLMAeLKKKR	0.644	0.177	0.179	0.239	0.278	0.436	0.222	0.261	0.215	0.633	0.217	3	oncogene, fusion
P15056/F468C	P15056	BRAF	BRAF_HUMAN	F468C	42	Gly-rich-loop;β1/β2-loop	-	-	IGSGSfTVYKG	0.08	0.431	0.489	0.802	0.779	0.549	0.752	0.577	0.776	0.545	0.683	3	oncogene, fusion
P15056/G593D	P15056	BRAF	BRAF_HUMAN	G593D	478	Catalytic-loop	-	-	LTVKIgFGLAT	0.121	0.591	0.289	0.78	0.724	0.409	0.587	0.581	0.778	0.41	0.68	3	oncogene, fusion
P15056/H539Y	P15056	BRAF	BRAF_HUMAN	H539Y	251	αD	-	-	GSSLYhLHIIE	0.254	0.322	0.424	0.628	0.518	0.504	0.491	0.379	0.477	0.588	0.483	3	oncogene, fusion
P15056/P708S	P15056	BRAF	BRAF_HUMAN	P708S	843	αI	-	-	ERPLFpILASI	0.499	0.148	0.353	0.228	0.177	0.495	0.304	0.23	0.158	0.64	0.212	3	oncogene, fusion
P15056/R444W	P15056	BRAF	BRAF_HUMAN	R444W	17	N-term-β1	-	-	KTLGRrSSDDW	0.188	0.447	0.365	0.708	0.623	0.441	0.581	0.549	0.649	0.493	0.477	3	oncogene, fusion
P15056/R671Q	P15056	BRAF	BRAF_HUMAN	R671Q	661	αG/αH-loop	-	-	IFMVGrYLSPD	0.222	0.235	0.543	0.656	0.579	0.586	0.624	0.352	0.478	0.665	0.39	3	oncogene, fusion
P15056/R682W	P15056	BRAF	BRAF_HUMAN	R682W	695	αG/αH-loop	-	-	DLSKVrNCPKA	0.423	0.249	0.329	0.42	0.404	0.453	0.376	0.325	0.306	0.625	0.203	3	oncogene, fusion
P15735/R44Q	P15735	PHKG2	PHKG2_HUMAN	R44Q	59	β2/β3-loop	-	-	RRCVHrTGHEF	0.729	0.076	0.195	0.175	0.169	0.481	0.249	0.18	0.115	0.64	0.18	3	NA
P16066/D678N	P16066	NPR1	ANPRA_HUMAN	D678N	479	A-loop;DFG-motif	-	-	VLKITdGLESF	0.275	0.55	0.175	0.723	0.702	0.186	0.389	0.693	0.607	0.224	0.359	3	NA
P16234/D756N	P16234	PDGFRA	PGFRA_HUMAN	D756N	324	αD/αE-loop	-	-	VSKYSdQRSLY	0.705	0.117	0.177	0.188	0.146	0.462	0.225	0.195	0.127	0.668	0.203	3	oncogene, fusion
P16234/L891F	P16234	PDGFRA	PGFRA_HUMAN	L891F	602	αF/αG-loop	-	-	WEIFSlGTPYP	0.404	0.221	0.375	0.429	0.329	0.48	0.365	0.329	0.277	0.612	0.305	3	oncogene, fusion
P16234/R804Q	P16234	PDGFRA	PGFRA_HUMAN	R804Q	383	αE	-	-	TYQVArMEFLA	0.573	0.181	0.247	0.378	0.448	0.46	0.335	0.343	0.274	0.57	0.2	3	oncogene, fusion
P16234/R822C	P16234	PDGFRA	PGFRA_HUMAN	R822C	430	Catalytic-loop	-	-	RDLAArVLLAQ	0.117	0.665	0.218	0.803	0.83	0.316	0.614	0.688	0.856	0.286	0.519	3	oncogene, fusion
P16234/S851L	P16234	PDGFRA	PGFRA_HUMAN	S851L	525	A-loop	-	-	DSNYVsGSTFL	0.206	0.248	0.545	0.749	0.708	0.699	0.809	0.316	0.558	0.746	0.517	3	oncogene, fusion
P16234/S890F	P16234	PDGFRA	PGFRA_HUMAN	S890F	601	αF	-	-	LWEIFsGGTPY	0.309	0.36	0.331	0.558	0.508	0.445	0.566	0.426	0.462	0.503	0.402	3	oncogene, fusion
P17252/A444V	P17252	PRKCA	KPCA_HUMAN	A444V	378	αE	-	-	QAVFYaEISIG	0.292	0.329	0.379	0.489	0.504	0.468	0.459	0.397	0.462	0.584	0.407	3	NA
P17612/G126S	P17612	PRKACA	KAPCA_HUMAN	G126S	239	β5/αD-loop	-	-	MEYVPgEMFSH	0.258	0.357	0.385	0.577	0.547	0.487	0.605	0.391	0.507	0.611	0.598	3	oncogene
P17612/P102L	P17612	PRKACA	KAPCA_HUMAN	P102L	172	αC/β4-loop	-	-	QAVNFpLVKLE	0.343	0.403	0.255	0.495	0.553	0.412	0.521	0.486	0.505	0.456	0.62	3	oncogene
P17948/E1091K	P17948	FLT1	VGFR1_HUMAN	E1091K	597	αF	-	-	GVLLWeFSLGG	0.141	0.573	0.286	0.702	0.686	0.344	0.575	0.617	0.767	0.366	0.549	3	NA
P17948/R824Q	P17948	FLT1	VGFR1_HUMAN	R824Q	28	N-term-β1	-	-	KWEFArRLKLG	0.246	0.296	0.458	0.614	0.57	0.571	0.589	0.373	0.496	0.583	0.399	3	NA
P20594/R562Q	P20594	NPR2	ANPRB_HUMAN	R562Q	144	αC	-	-	RIELTrVLFEL	0.566	0.207	0.228	0.234	0.258	0.502	0.318	0.251	0.225	0.663	0.142	3	NA
P21127/P495H	P21127	CDK11B	CD11B_HUMAN	P495H	172	αC/β4-loop	-	-	LKAQHpIVTVR	0.326	0.312	0.362	0.504	0.506	0.514	0.482	0.416	0.427	0.6	0.592	3	NA
P21127/S414L	P21127	CDK11B	CD11B_HUMAN	S414L	4	N-term-β1	p	-	DSPALsIELKQ	0.198	0.38	0.422	0.632	0.63	0.545	0.705	0.448	0.557	0.543	0.414	3	NA
P21802/E475K	P21802	FGFR2	FGFR2_HUMAN	E475K	25	N-term-β1	-	-	EDPKWePRDKL	0.275	0.286	0.439	0.597	0.601	0.521	0.535	0.442	0.444	0.515	0.48	3	oncogene, fusion
P21802/P666S	P21802	FGFR2	FGFR2_HUMAN	P666S	536	A-loop	-	-	TNGRLpKWMAP	0.129	0.706	0.165	0.738	0.739	0.331	0.619	0.668	0.808	0.3	0.504	3	oncogene, fusion
P21860/I938V	P21860	ERBB3	ERBB3_HUMAN	I938V	806	αH	-	-	PQICTiVYMVM	0.433	0.193	0.374	0.394	0.3	0.488	0.38	0.265	0.305	0.68	0.288	3	oncogene
P22455/P694L	P22455	FGFR4	FGFR4_HUMAN	P694L	637	αF/αG-loop	-	-	PYPGIpEELFS	0.358	0.348	0.294	0.472	0.503	0.467	0.415	0.434	0.418	0.517	0.438	3	oncogene
P22455/R464W	P22455	FGFR4	FGFR4_HUMAN	R464W	27	N-term-β1	-	-	LWEFPrRLVLG	0.148	0.469	0.383	0.754	0.689	0.472	0.657	0.554	0.729	0.47	0.489	3	oncogene
P22455/R563Q	P22455	FGFR4	FGFR4_HUMAN	R563Q	254	αD	-	-	LREFLrRRPPG	0.192	0.312	0.497	0.628	0.575	0.618	0.608	0.341	0.544	0.658	0.434	3	oncogene
P22455/R733S	P22455	FGFR4	FGFR4_HUMAN	R733S	832	αH/αI-loop	-	-	AAPSQrTFKQL	0.112	0.665	0.223	0.764	0.78	0.288	0.574	0.667	0.777	0.297	0.504	3	oncogene
P22607/D580N	P22607	FGFR3	FGFR3_HUMAN	D580N	349	αD/αE-loop	-	-	LDYSFdCKPPE	0.73	0.09	0.18	0.156	0.15	0.453	0.213	0.171	0.142	0.677	0.18	3	oncogene, fusion
P22607/S679F	P22607	FGFR3	FGFR3_HUMAN	S679F	590	αF	-	-	QSDVWsGVLLW	0.141	0.642	0.217	0.734	0.779	0.293	0.601	0.662	0.722	0.316	0.507	3	oncogene, fusion
P22607/V630M	P22607	FGFR3	FGFR3_HUMAN	V630M	474	Catalytic-loop	-	-	VTEDNvKIADF	0.271	0.308	0.421	0.572	0.616	0.542	0.561	0.418	0.501	0.625	0.529	3	oncogene, fusion
P22612/R195H	P22612	PRKACG	KAPCG_HUMAN	R195H	503	A-loop	-	-	KRVKGrWTLCG	0.22	0.352	0.428	0.673	0.588	0.573	0.684	0.422	0.499	0.554	0.503	3	NA
P23443/R330S	P23443	RPS6KB1	KS6B1_HUMAN	R330S	825	αH/αI-loop	-	-	KKLLKrAASRL	0.458	0.231	0.311	0.407	0.368	0.487	0.41	0.291	0.298	0.639	0.28	3	NA
P23458/P960S	P23458	JAK1	JAK1_HUMAN	P960S	238	β5/αD-loop	-	-	IMEFLpGSLKE	0.318	0.298	0.384	0.525	0.438	0.461	0.475	0.392	0.447	0.598	0.489	3	oncogene, TSG
P23458/S1066C	P23458	JAK1	JAK1_HUMAN	S1066C	590	αF	-	-	ASDVWsGVTLH	0.176	0.529	0.296	0.695	0.72	0.385	0.586	0.563	0.636	0.455	0.508	3	oncogene, TSG
P25092/F738L	P25092	GUCY2C	GUC2C_HUMAN	F738L	842	αI	-	-	EKRPDfKIETT	0.267	0.306	0.427	0.583	0.524	0.538	0.485	0.37	0.465	0.617	0.51	3	NA
P25092/G549C	P25092	GUCY2C	GUC2C_HUMAN	G549C	184	β4	-	-	LTKFYgVKLDT	0.14	0.554	0.306	0.753	0.74	0.403	0.616	0.571	0.725	0.422	0.555	3	NA
P25092/R705H	P25092	GUCY2C	GUC2C_HUMAN	R705H	660	αG	-	-	GMKPFrDLFLE	0.275	0.331	0.393	0.507	0.512	0.532	0.487	0.343	0.407	0.607	0.384	3	NA
P25098/R435W	P25098	GRK2	ARBK1_HUMAN	R435W	829	αH/αI-loop	-	-	QRDVNrLGCLG	0.531	0.18	0.289	0.323	0.279	0.434	0.331	0.288	0.305	0.637	0.186	3	NA
P27361/A160T	P27361	MAPK3	MK03_HUMAN	A160T	405	Catalytic-loop	-	-	KYIHSaVLHRD	0.223	0.345	0.433	0.63	0.653	0.499	0.503	0.441	0.601	0.565	0.481	3	NA
P27361/E18Q	P27361	MAPK3	MK03_HUMAN	E18Q	7	N-term-β1	-	-	EPRRTeVGPGV	0.816	0.076	0.107	0.205	0.202	0.395	0.192	0.192	0.107	0.644	0.236	3	NA
P27361/E27G	P27361	MAPK3	MK03_HUMAN	E27G	16	N-term-β1	-	-	PGVPGeEMVKG	0.749	0.133	0.118	0.291	0.293	0.403	0.225	0.318	0.231	0.55	0.178	3	NA
P29317/P591S	P29317	EPHA2	EPHA2_HUMAN	P591S	8	N-term-β1	-	-	KTYVDpTYEDP	0.27	0.39	0.34	0.616	0.559	0.493	0.503	0.519	0.519	0.51	0.534	3	NA
P29317/S790F	P29317	EPHA2	EPHA2_HUMAN	S790F	547	A-loop	-	-	APEAIsRKFTS	0.314	0.222	0.464	0.545	0.513	0.572	0.563	0.349	0.424	0.66	0.451	3	NA
P29320/C636F	P29320	EPHA3	EPHA3_HUMAN	C636F	47	β2	-	-	EFGEVcGRLKL	0.203	0.408	0.389	0.692	0.612	0.477	0.547	0.481	0.624	0.569	0.557	3	inconclusive
P29320/K889N	P29320	EPHA3	EPHA3_HUMAN	K889N	861	C-term-αI	-	-	NPGSLkITSAA	0.459	0.302	0.239	0.468	0.47	0.512	0.438	0.377	0.465	0.582	0.259	3	inconclusive
P29320/P643S	P29320	EPHA3	EPHA3_HUMAN	P643S	74	β2/β3-loop	-	-	GRLKLpKKEIS	0.352	0.258	0.39	0.499	0.469	0.494	0.501	0.403	0.433	0.577	0.435	3	inconclusive
P29320/R745Q	P29320	EPHA3	EPHA3_HUMAN	R745Q	424	Catalytic-loop;HrD-motif	-	-	MGYVHrLAARN	0.243	0.45	0.306	0.662	0.641	0.42	0.567	0.492	0.628	0.425	0.439	3	inconclusive
P29320/T791I	P29320	EPHA3	EPHA3_HUMAN	T791I	541	A-loop	-	-	IPIRWtPEAIA	0.344	0.258	0.398	0.438	0.457	0.569	0.522	0.352	0.392	0.68	0.382	3	inconclusive
P29322/A880V	P29322	EPHA8	EPHA8_HUMAN	A880V	828	αH/αI-loop	-	-	WHKDRaRPRFS	0.669	0.14	0.191	0.258	0.226	0.435	0.248	0.281	0.186	0.645	0.212	3	NA
P29322/G642S	P29322	EPHA8	EPHA8_HUMAN	G642S	38	β1;Gly-rich-loop	-	-	IEKIIgGDSGE	0.129	0.416	0.455	0.779	0.757	0.5	0.67	0.524	0.687	0.563	0.692	3	NA
P29323/E607K	P29323	EPHB2	EPHB2_HUMAN	E607K	16	N-term-β1	-	-	YEDPNeVREFA	0.545	0.263	0.192	0.37	0.386	0.43	0.311	0.365	0.333	0.533	0.25	3	NA
P29597/E1050K	P29597	TYK2	TYK2_HUMAN	E1050K	498	A-loop	-	-	AKAVPeHEYYR	0.679	0.065	0.256	0.343	0.298	0.442	0.321	0.188	0.174	0.693	0.34	3	NA
P30530/G517D	P30530	AXL	UFO_HUMAN	G517D	11	N-term-β1	-	-	TLNSLgSEELK	0.225	0.452	0.324	0.637	0.546	0.54	0.568	0.439	0.591	0.529	0.556	3	NA
P30530/R704H	P30530	AXL	UFO_HUMAN	R704H	524	A-loop	-	-	NGDYYrGRIAK	0.254	0.392	0.354	0.586	0.613	0.459	0.566	0.413	0.469	0.473	0.38	3	NA
P31152/E321K	P31152	MAPK4	MK04_HUMAN	E321K	861	C-term-αI	-	-	SCPEDeTSQHP	0.168	0.436	0.396	0.755	0.728	0.536	0.66	0.515	0.68	0.586	0.502	3	NA
P31152/R57H	P31152	MAPK4	MK04_HUMAN	R57H	117	β3/αC-loop	-	-	ALSDArMKHAL	0.797	0.079	0.123	0.238	0.204	0.379	0.178	0.179	0.167	0.575	0.111	3	NA
P31152/R70W	P31152	MAPK4	MK04_HUMAN	R70W	155	αC/β4-loop	-	-	EIKIIrLDHDN	0.208	0.4	0.392	0.632	0.627	0.386	0.586	0.484	0.578	0.421	0.494	3	NA
P31749/D221N	P31749	AKT1	AKT1_HUMAN	D221N	218	β4/β5-loop	-	-	SFQTHdLCFVM	0.371	0.214	0.414	0.451	0.438	0.478	0.455	0.283	0.399	0.607	0.35	3	oncogene
P31749/D323Y	P31749	AKT1	AKT1_HUMAN	D323Y	576	A-loop	-	-	PEVLEdDYGRA	0.237	0.404	0.36	0.517	0.576	0.466	0.462	0.469	0.519	0.538	0.414	3	oncogene
P31749/G162S	P31749	AKT1	AKT1_HUMAN	G162S	43	Gly-rich-loop;β2	-	-	GKGTFgVILVK	0.11	0.529	0.36	0.786	0.787	0.48	0.634	0.537	0.757	0.492	0.611	3	oncogene
P31749/T291I	P31749	AKT1	AKT1_HUMAN	T291I	478	Catalytic-loop	-	-	GHIKItFGLCK	0.337	0.262	0.401	0.514	0.494	0.54	0.531	0.332	0.468	0.624	0.45	3	oncogene
P31751/E323K	P31751	AKT2	AKT2_HUMAN	E323K	575	A-loop	-	-	APEVLeNDYGR	0.399	0.227	0.374	0.405	0.383	0.499	0.41	0.273	0.358	0.651	0.305	3	oncogene
P31751/R368C	P31751	AKT2	AKT2_HUMAN	R368C	695	αG/αH-loop	-	-	LMEEIrPRTLS	0.225	0.38	0.394	0.528	0.539	0.455	0.484	0.449	0.535	0.536	0.338	3	oncogene
P32298/D405N	P32298	GRK4	GRK4_HUMAN	D405N	691	αG/αH-loop	-	-	QRIKNdEEYSE	0.739	0.118	0.142	0.177	0.168	0.437	0.204	0.216	0.153	0.68	0.183	3	NA
P32298/R237I	P32298	GRK4	GRK4_HUMAN	R237I	151	αC	-	-	ALNEKrLEKVQ	0.42	0.248	0.332	0.424	0.383	0.497	0.418	0.331	0.31	0.637	0.273	3	NA
P32298/R307I	P32298	GRK4	GRK4_HUMAN	R307I	406	Catalytic-loop	-	-	DLQRErVYRDL	0.231	0.38	0.389	0.611	0.65	0.471	0.555	0.454	0.563	0.462	0.406	3	NA
P33981/K546N	P33981	TTK	TTK_HUMAN	K546N	79	β2/β3-loop	ub	-	QVLNEkQIYAI	0.391	0.175	0.435	0.451	0.502	0.511	0.526	0.276	0.445	0.649	0.161	3	NA
P33981/S618F	P33981	TTK	TTK_HUMAN	S618F	358	αD/αE-loop	-	-	LKKKKsDPWER	0.536	0.183	0.281	0.343	0.338	0.467	0.391	0.333	0.297	0.592	0.196	3	NA
P33981/S719F	P33981	TTK	TTK_HUMAN	S719F	590	αF	-	-	KSDVWsGCILY	0.175	0.613	0.211	0.71	0.749	0.235	0.59	0.668	0.683	0.286	0.487	3	NA
P34925/R560Q	P34925	RYK	RYK_HUMAN	R560Q	664	αG/αH-loop	-	-	LKDGYrAQPIN	0.222	0.431	0.347	0.607	0.59	0.437	0.512	0.496	0.553	0.516	0.38	3	NA
P34947/S418F	P34947	GRK5	GRK5_HUMAN	S418F	816	αH	-	-	SEEAKsCKMLL	0.297	0.365	0.338	0.599	0.517	0.42	0.477	0.467	0.474	0.515	0.463	3	NA
P34947/V308I	P34947	GRK5	GRK5_HUMAN	V308I	419	Catalytic-loop	-	-	HRENTvRDLKP	0.757	0.102	0.14	0.243	0.176	0.385	0.257	0.198	0.17	0.609	0.192	3	NA
P35590/D979N	P35590	TIE1	TIE1_HUMAN	D979N	426	Catalytic-loop;HrD-motif	-	-	QFIHRdAARNV	0.117	0.695	0.187	0.813	0.832	0.284	0.571	0.737	0.83	0.212	0.472	3	NA
P35626/G201E	P35626	GRK3	ARBK2_HUMAN	G201E	41	Gly-rich-loop;β1/β2-loop	-	-	IIGRGgGEVYG	0.127	0.454	0.419	0.776	0.737	0.461	0.673	0.549	0.721	0.523	0.522	3	NA
P35916/D1003N	P35916	FLT4	VGFR3_HUMAN	D1003N	352	αD/αE-loop	-	-	DQEAEdWLSPL	0.808	0.06	0.132	0.147	0.164	0.454	0.199	0.154	0.118	0.663	0.166	3	oncogene
P35916/E1138K	P35916	FLT4	VGFR3_HUMAN	E1138K	701	αG/αH-loop	-	-	RMRAPeATPAI	0.743	0.097	0.16	0.201	0.182	0.485	0.193	0.227	0.156	0.674	0.209	3	oncogene
P35916/E989Q	P35916	FLT4	VGFR3_HUMAN	E989Q	338	αD/αE-loop	-	-	RFSKTeGARRA	0.939	0.021	0.04	0.081	0.087	0.352	0.127	0.115	0.067	0.681	0.119	3	oncogene
P35916/L1058F	P35916	FLT4	VGFR3_HUMAN	L1058F	482	A-loop	-	-	ICDFGlRDIYK	0.285	0.24	0.474	0.69	0.626	0.615	0.646	0.355	0.553	0.614	0.473	3	oncogene
P35916/R1075Q	P35916	FLT4	VGFR3_HUMAN	R1075Q	530	A-loop	-	-	RKGSArPLKWM	0.181	0.519	0.299	0.668	0.652	0.333	0.601	0.539	0.68	0.368	0.344	3	oncogene
P35916/R1145C	P35916	FLT4	VGFR3_HUMAN	R1145C	814	αH	-	-	ATPAIrIMLNC	0.635	0.137	0.228	0.213	0.212	0.487	0.269	0.204	0.191	0.667	0.147	3	oncogene
P35916/R891C	P35916	FLT4	VGFR3_HUMAN	R891C	144	αC	-	-	TASEHrLMSEL	0.299	0.395	0.306	0.621	0.568	0.414	0.493	0.487	0.521	0.464	0.407	3	oncogene
P35916/T1093M	P35916	FLT4	VGFR3_HUMAN	T1093M	583	αF	-	-	DKVYTtSDVWS	0.447	0.224	0.329	0.427	0.357	0.456	0.416	0.377	0.379	0.573	0.391	3	oncogene
P35968/D1056N	P35968	KDR	VGFR2_HUMAN	D1056N	503	A-loop	-	-	RDIYKdDYVRK	0.589	0.118	0.293	0.424	0.359	0.53	0.502	0.22	0.248	0.662	0.475	3	oncogene
P35968/D1189N	P35968	KDR	VGFR2_HUMAN	D1189N	879	C-term-αI	-	-	LSMEEdGLSLP	0.532	0.18	0.289	0.485	0.415	0.403	0.386	0.322	0.347	0.585	0.316	3	oncogene
P35968/G948E	P35968	KDR	VGFR2_HUMAN	G948E	273	αD/αE-loop	-	-	ARFRQgDYVGA	0.836	0.023	0.142	0.095	0.181	0.428	0.191	0.105	0.112	0.72	0.126	3	oncogene
P35968/G948W	P35968	KDR	VGFR2_HUMAN	G948W	273	αD/αE-loop	-	-	ARFRQgDYVGA	0.717	0.114	0.169	0.239	0.254	0.433	0.247	0.236	0.146	0.642	0.189	3	oncogene
P35968/R1118Q	P35968	KDR	VGFR2_HUMAN	R1118Q	654	αG	-	-	EEFCRrKEGTR	0.562	0.175	0.263	0.329	0.339	0.519	0.3	0.241	0.256	0.654	0.176	3	oncogene
P36507/D341N	P36507	MAP2K2	MP2K2_HUMAN	D341N	812	αH	-	-	GVFTPdQEFVN	0.679	0.107	0.214	0.213	0.188	0.452	0.23	0.157	0.138	0.647	0.234	3	oncogene
P36507/F57C	P36507	MAP2K2	MP2K2_HUMAN	F57C	16	N-term-β1	-	resistance	KRLEAfTQKAK	0.245	0.453	0.303	0.722	0.686	0.445	0.516	0.483	0.604	0.505	0.512	3	oncogene
P36507/P128L	P36507	MAP2K2	MP2K2_HUMAN	P128L	172	αC/β4-loop	-	-	HECNSpIVGFY	0.409	0.34	0.251	0.486	0.549	0.477	0.479	0.428	0.527	0.548	0.588	3	oncogene
P36507/R281W	P36507	MAP2K2	MP2K2_HUMAN	R281W	661	αG/αH-loop	-	-	EAIFGrVVDGE	0.37	0.241	0.39	0.431	0.402	0.562	0.479	0.265	0.38	0.693	0.356	3	oncogene
P36507/R388Q	P36507	MAP2K2	MP2K2_HUMAN	R388Q	871	C-term-αI	-	-	LCKTLrNQPGT	0.861	0.025	0.114	0.139	0.138	0.457	0.193	0.119	0.102	0.743	0.098	3	oncogene
P36507/S154F	P36507	MAP2K2	MP2K2_HUMAN	S154F	241	β5/αD-loop	-	-	HMDGGsDQVLK	0.114	0.661	0.225	0.806	0.738	0.317	0.651	0.629	0.711	0.337	0.8	3	oncogene
P36507/V283M	P36507	MAP2K2	MP2K2_HUMAN	V283M	674	αG/αH-loop	-	-	IFGRPvDGEEG	0.892	0.052	0.055	0.133	0.172	0.339	0.112	0.159	0.095	0.646	0.117	3	oncogene
P36888/A953V	P36888	FLT3	FLT3_HUMAN	A953V	860	C-term-αI	-	-	ADAEEaYQNVD	0.645	0.124	0.231	0.389	0.286	0.496	0.314	0.282	0.241	0.63	0.279	3	oncogene
P36888/F594V	P36888	FLT3	FLT3_HUMAN	F594V	15	N-term-β1	-	-	YFYVDfEYEYD	0.292	0.278	0.43	0.572	0.598	0.537	0.575	0.411	0.534	0.594	0.471	3	oncogene
P36888/L601F	P36888	FLT3	FLT3_HUMAN	L601F	22	N-term-β1	-	-	EYEYDlWEFPR	0.629	0.184	0.187	0.415	0.378	0.432	0.333	0.37	0.303	0.617	0.276	3	oncogene
P36888/L601I	P36888	FLT3	FLT3_HUMAN	L601I	22	N-term-β1	-	-	EYEYDlWEFPR	0.781	0.116	0.103	0.32	0.279	0.419	0.291	0.3	0.205	0.613	0.282	3	oncogene
P36888/M837I	P36888	FLT3	FLT3_HUMAN	M837I	498	A-loop	-	-	LARDImDSNYV	0.329	0.216	0.456	0.519	0.445	0.562	0.511	0.299	0.295	0.678	0.581	3	oncogene
P36888/S806L	P36888	FLT3	FLT3_HUMAN	S806L	406	Catalytic-loop	-	-	FLEFKsVHRDL	0.679	0.134	0.186	0.207	0.235	0.414	0.253	0.262	0.192	0.533	0.126	3	oncogene
P36896/D402E	P36896	ACVR1B	ACV1B_HUMAN	D402E	587	αF	-	-	SFKCAdYALGL	0.132	0.626	0.242	0.719	0.67	0.349	0.576	0.566	0.637	0.325	0.566	3	TSG
P36896/R484H	P36896	ACVR1B	ACV1B_HUMAN	R484H	832	αH/αI-loop	-	-	ANGAArTALRI	0.129	0.652	0.219	0.719	0.746	0.291	0.54	0.641	0.741	0.326	0.439	3	TSG
P36897/D363N	P36897	TGFBR1	TGFR1_HUMAN	D363N	507	A-loop	-	-	HDSATdIDIAP	0.618	0.118	0.264	0.378	0.356	0.532	0.418	0.167	0.296	0.702	0.319	3	NA
P36897/F396L	P36897	TGFBR1	TGFR1_HUMAN	F396L	582	A-loop	-	-	KHFESfRADIY	0.214	0.343	0.442	0.603	0.59	0.56	0.587	0.491	0.535	0.642	0.476	3	NA
P36897/H283R	P36897	TGFBR1	TGFR1_HUMAN	H283R	237	β5/αD-loop	-	-	LVSDYhHGSLF	0.114	0.548	0.339	0.757	0.693	0.39	0.548	0.581	0.767	0.412	0.553	3	NA
P36897/S287F	P36897	TGFBR1	TGFR1_HUMAN	S287F	241	β5/αD-loop	-	-	YHEHGsFDYLN	0.126	0.645	0.23	0.799	0.716	0.316	0.64	0.626	0.697	0.334	0.815	3	NA
P37023/R374W	P37023	ACVRL1	ACVL1_HUMAN	R374W	539	A-loop	-	-	RVGTKrMAPEV	0.173	0.433	0.395	0.696	0.699	0.469	0.595	0.501	0.684	0.535	0.449	3	NA
P37023/V228I	P37023	ACVRL1	ACVL1_HUMAN	V228I	94	β3	-	-	GESVAvIFSSR	0.68	0.174	0.147	0.382	0.357	0.423	0.265	0.3	0.266	0.501	0.233	3	NA
P37173/C393F	P37173	TGFBR2	TGFR2_HUMAN	C393F	475	Catalytic-loop	-	-	KNDLTcLCDFG	0.168	0.491	0.341	0.721	0.697	0.435	0.607	0.551	0.686	0.408	0.561	3	TSG
P37173/D446V	P37173	TGFBR2	TGFR2_HUMAN	D446V	587	αF	-	-	SFKQTdYSMAL	0.138	0.687	0.175	0.77	0.726	0.236	0.529	0.675	0.746	0.274	0.533	3	TSG
P37173/D524Y	P37173	TGFBR2	TGFR2_HUMAN	D524Y	826	αH/αI-loop	-	-	ECWDHdEARLT	0.191	0.499	0.31	0.721	0.689	0.5	0.623	0.551	0.683	0.528	0.541	3	TSG
P37173/G351D	P37173	TGFBR2	TGFR2_HUMAN	G351D	378	αE	-	-	DLRKLgSLARG	0.302	0.387	0.312	0.577	0.473	0.489	0.485	0.473	0.496	0.522	0.443	3	TSG
P37173/K277N	P37173	TGFBR2	TGFR2_HUMAN	K277N	96	β3;Catalytic-Lys	-	-	ETVAVkFPYEE	0.003	0.987	0.01	0.996	0.997	0.013	0.675	0.991	0.989	0.013	0.551	3	TSG
P37173/P501S	P37173	TGFBR2	TGFR2_HUMAN	P501S	695	αG/αH-loop	-	-	GRPEIpFWLNH	0.36	0.265	0.376	0.468	0.454	0.495	0.473	0.359	0.385	0.602	0.353	3	TSG
P41240/D332N	P41240	CSK	CSK_HUMAN	D332N	479	A-loop;DFG-motif	-	-	VAKVSdGLTKE	0.022	0.933	0.045	0.939	0.952	0.102	0.625	0.902	0.929	0.092	0.613	3	NA
P41743/R278H	P41743	PRKCI	KPCI_HUMAN	R278H	87	β2/β3-loop	-	-	LKKTDrYAMKV	0.366	0.316	0.318	0.48	0.438	0.466	0.391	0.408	0.394	0.508	0.248	3	NA
P41743/S326G	P41743	PRKCI	KPCI_HUMAN	S326G	218	β4/β5-loop	-	-	CFQTEsLFFVI	0.324	0.241	0.434	0.507	0.519	0.538	0.478	0.359	0.427	0.618	0.464	3	NA
P42681/E497K	P42681	TXK	TXK_HUMAN	E497K	816	αH	-	-	PMSIYeMYSCW	0.888	0.035	0.077	0.125	0.111	0.395	0.153	0.123	0.089	0.686	0.152	3	NA
P42681/G463E	P42681	TXK	TXK_HUMAN	G463E	604	αF/αG-loop	-	-	EVFTEgMPFEN	0.136	0.465	0.398	0.729	0.712	0.5	0.687	0.51	0.666	0.581	0.618	3	NA
P42684/P487L	P42684	ABL2	ABL2_HUMAN	P487L	631	αF/αG-loop	-	-	GMSPYpIDLSQ	0.29	0.439	0.271	0.559	0.603	0.411	0.512	0.52	0.6	0.431	0.503	3	oncogene, fusion
P42684/R378Q	P42684	ABL2	ABL2_HUMAN	R378Q	355	αD/αE-loop	-	-	LRECNrEVTAV	0.614	0.136	0.25	0.251	0.267	0.497	0.343	0.191	0.191	0.642	0.17	3	oncogene, fusion
P42685/R231C	P42685	FRK	FRK_HUMAN	R231C	28	N-term-β1	-	-	QWEIDrSIQLL	0.175	0.374	0.451	0.732	0.749	0.541	0.658	0.445	0.731	0.505	0.479	3	NA
P43250/L375M	P43250	GRK6	GRK6_HUMAN	L375M	595	αF	-	-	ALGCLlEMIAG	0.643	0.139	0.218	0.247	0.234	0.462	0.238	0.234	0.221	0.601	0.265	3	NA
P43405/D554N	P43405	SYK	KSYK_HUMAN	D554N	587	αF	-	-	FSSKSdWSFGV	0.155	0.643	0.202	0.713	0.67	0.221	0.534	0.606	0.699	0.242	0.555	3	oncogene, fusion
P43405/P411L	P43405	SYK	KSYK_HUMAN	P411L	120	αC	-	-	NEANDpLKDEL	0.435	0.197	0.368	0.429	0.341	0.518	0.441	0.257	0.279	0.703	0.33	3	oncogene, fusion
P43405/R627H	P43405	SYK	KSYK_HUMAN	R627H	854	αI	-	-	VELRLrYYYDV	0.659	0.125	0.216	0.301	0.217	0.529	0.316	0.197	0.176	0.687	0.178	3	oncogene, fusion
P45983/G171S	P45983	MAPK8	MK08_HUMAN	G171S	481	A-loop;DFG-motif	-	-	KILDFgARTAG	0.078	0.391	0.531	0.79	0.833	0.594	0.764	0.482	0.789	0.59	0.67	3	NA
P45983/R25Q	P45983	MAPK8	MK08_HUMAN	R25Q	30	N-term-β1	-	-	FTVLKrQNLKP	0.244	0.39	0.366	0.646	0.602	0.492	0.562	0.415	0.525	0.614	0.364	3	NA
P45984/H125Y	P45984	MAPK9	MK09_HUMAN	H125Y	366	αE	-	-	HMELDhRMSYL	0.209	0.271	0.52	0.597	0.529	0.598	0.609	0.387	0.477	0.642	0.46	3	NA
P45985/F340S	P45985	MAP2K4	MP2K4_HUMAN	F340S	813	αH	-	-	EFSPSfNFVNL	0.161	0.483	0.356	0.714	0.68	0.414	0.581	0.6	0.691	0.456	0.575	3	oncogene, TSG
P45985/P272S	P45985	MAP2K4	MP2K4_HUMAN	P272S	543	A-loop;APE-motif	-	-	RPYMApRIDPS	0.167	0.638	0.195	0.688	0.675	0.271	0.538	0.655	0.685	0.274	0.52	3	oncogene, TSG
P45985/S257F	P45985	MAP2K4	MP2K4_HUMAN	S257F	503	A-loop	p	-	GQLVDsAKTRD	0.151	0.358	0.491	0.741	0.735	0.534	0.793	0.422	0.699	0.611	0.632	3	oncogene, TSG
P45985/S288F	P45985	MAP2K4	MP2K4_HUMAN	S288F	585	αF	-	-	GYDVRsVWSLG	0.165	0.507	0.327	0.716	0.685	0.435	0.624	0.51	0.638	0.46	0.57	3	oncogene, TSG
P46734/M223I	P46734	MAP2K3	MP2K3_HUMAN	M223I	529	A-loop	-	-	SVAKTmAGCKP	0.396	0.331	0.273	0.723	0.628	0.454	0.605	0.434	0.659	0.518	0.296	3	NA
P46734/R42W	P46734	MAP2K3	MP2K3_HUMAN	R42W	7	N-term-β1	-	-	NPTPPrLDSRT	0.277	0.337	0.386	0.542	0.479	0.504	0.506	0.419	0.424	0.582	0.412	3	NA
P49336/G33S	P49336	CDK8	CDK8_HUMAN	G33S	43	Gly-rich-loop;β2	-	-	GRGTYgVYKAK	0.14	0.479	0.38	0.733	0.717	0.49	0.61	0.475	0.661	0.522	0.563	3	NA
P49336/V93L	P49336	CDK8	CDK8_HUMAN	V93L	227	β4/β5-loop	-	-	HADRKvLLFDY	0.486	0.189	0.325	0.368	0.295	0.476	0.429	0.225	0.263	0.659	0.319	3	NA
P49674/R127W	P49674	CSNK1E	KC1E_HUMAN	R127W	424	Catalytic-loop;HrD-motif	-	-	KNFIHrVKPDN	0.092	0.622	0.286	0.822	0.826	0.352	0.665	0.659	0.85	0.332	0.531	3	NA
P49761/R489H	P49761	CLK3	CLK3_HUMAN	R489H	541	A-loop	-	-	ATRHYrPEVIL	0.118	0.577	0.304	0.709	0.684	0.399	0.608	0.582	0.652	0.415	0.44	3	NA
P49840/R283H	P49840	GSK3A	GSK3A_HUMAN	R283H	538	A-loop	-	-	SYICSrYRAPE	0.171	0.517	0.312	0.737	0.694	0.419	0.632	0.557	0.733	0.42	0.495	3	NA
P49840/R417H	P49840	GSK3A	GSK3A_HUMAN	R417H	866	C-term-αI	-	-	QLPNNrLPPLF	0.226	0.419	0.355	0.644	0.59	0.5	0.529	0.436	0.582	0.525	0.421	3	NA
P49841/R148Q	P49841	GSK3B	GSK3B_HUMAN	R148Q	353	αD/αE-loop	-	-	ARHYSrKQTLP	0.742	0.079	0.179	0.172	0.163	0.477	0.276	0.133	0.117	0.715	0.112	3	NA
P51451/S341L	P51451	BLK	BLK_HUMAN	S341L	378	αE	-	-	RLIDMsQIAEG	0.595	0.152	0.253	0.221	0.208	0.506	0.266	0.228	0.191	0.664	0.207	3	NA
P51617/P197L	P51617	IRAK1	IRAK1_HUMAN	P197L	14	N-term-β1	-	-	GARPFpCWPLC	0.564	0.141	0.295	0.335	0.265	0.527	0.339	0.246	0.251	0.646	0.274	3	NA
P51812/E233K	P51812	RPS6KA3	KS6A3_HUMAN	E233K	539	A-loop	-	-	FCGTVeMAPEV	0.251	0.283	0.466	0.633	0.593	0.59	0.58	0.397	0.571	0.559	0.481	3	NA
P51812/R114W	P51812	RPS6KA3	KS6A3_HUMAN	R114W	145	αC	-	-	VRDRVrKMERD	0.297	0.261	0.442	0.595	0.538	0.505	0.539	0.322	0.446	0.622	0.336	3	NA
P51813/F457L	P51813	BMX	BMX_HUMAN	F457L	146	αC	-	-	MSEDEfQEAQT	0.239	0.334	0.426	0.6	0.512	0.516	0.568	0.42	0.509	0.593	0.568	3	NA
P51813/L527W	P51813	BMX	BMX_HUMAN	L527W	391	αE	-	-	EGMAFlSHQFI	0.116	0.594	0.29	0.804	0.777	0.365	0.632	0.633	0.732	0.411	0.703	3	NA
P51813/R656H	P51813	BMX	BMX_HUMAN	R656H	832	αH/αI-loop	-	-	ELPEKrTFQQL	0.168	0.602	0.229	0.648	0.624	0.347	0.514	0.603	0.633	0.353	0.437	3	NA
P51841/P749S	P51841	GUCY2F	GUC2F_HUMAN	P749S	607	αF/αG-loop	-	-	MVRGTpCMMDL	0.235	0.417	0.348	0.587	0.601	0.434	0.509	0.535	0.645	0.429	0.519	3	NA
P51841/R826W	P51841	GUCY2F	GUC2F_HUMAN	R826W	868	C-term-αI	-	-	IDSMLrLEQYS	0.678	0.103	0.219	0.289	0.261	0.45	0.26	0.209	0.212	0.627	0.15	3	NA
P51955/V137I	P51955	NEK2	NEK2_HUMAN	V137I	418	Catalytic-loop	-	-	DGGHTvHRDLK	0.833	0.049	0.118	0.193	0.162	0.395	0.194	0.177	0.133	0.661	0.171	3	NA
P51957/G89D	P51957	NEK4	NEK4_HUMAN	G89D	240	β5/αD-loop	-	-	GFCEGgLYRKL	0.142	0.413	0.445	0.795	0.709	0.489	0.653	0.488	0.685	0.53	0.754	3	NA
P52333/A572T	P52333	JAK3	JAK3_HUMAN	A572T	149	αC	-	-	ESFLEaSLMSQ	0.77	0.118	0.112	0.239	0.236	0.334	0.233	0.262	0.273	0.572	0.168	3	oncogene
P52333/P664L	P52333	JAK3	JAK3_HUMAN	P664L	472	Catalytic-loop	-	-	GADGSpFIKLS	0.469	0.161	0.369	0.301	0.308	0.526	0.391	0.244	0.227	0.67	0.283	3	oncogene
P52333/P893L	P52333	JAK3	JAK3_HUMAN	P893L	215	β4/β5-loop	-	-	GVSYGpRQSLR	0.424	0.265	0.311	0.486	0.439	0.488	0.384	0.389	0.4	0.576	0.384	3	oncogene
P52333/R549Q	P52333	JAK3	JAK3_HUMAN	R549Q	79	β2/β3-loop	-	-	VDGEArTEVLL	0.72	0.093	0.186	0.217	0.234	0.436	0.28	0.128	0.16	0.692	0.083	3	oncogene
P53350/R262Q	P53350	PLK1	PLK1_HUMAN	R262Q	677	αG/αH-loop	-	-	KETYLrKKNEY	0.366	0.257	0.377	0.398	0.394	0.528	0.429	0.279	0.319	0.681	0.25	3	NA
P53350/R313H	P53350	PLK1	PLK1_HUMAN	R313H	860	C-term-αI	-	-	GYIPArPITCL	0.681	0.123	0.195	0.366	0.314	0.511	0.356	0.242	0.26	0.622	0.237	3	NA
P53355/M293I	P53355	DAPK1	DAPK1_HUMAN	M293I	870	C-term-αI	-	-	ASAVNmKFKKF	0.42	0.245	0.335	0.422	0.389	0.485	0.396	0.304	0.273	0.646	0.319	3	NA
P53355/R31H	P53355	DAPK1	DAPK1_HUMAN	R31H	53	β2	-	-	VVKKCrKSTGL	0.469	0.163	0.368	0.321	0.289	0.531	0.327	0.272	0.264	0.708	0.191	3	NA
P53667/V538I	P53667	LIMK1	LIMK1_HUMAN	V538I	594	αF	-	-	FSFGIvCEIIG	0.848	0.052	0.1	0.151	0.162	0.381	0.176	0.147	0.157	0.637	0.186	3	NA
P53671/P422L	P53671	LIMK2	LIMK2_HUMAN	P422L	358	αD/αE-loop	-	-	LRSMDpPWQQK	0.372	0.33	0.298	0.55	0.573	0.422	0.449	0.481	0.535	0.482	0.426	3	NA
P53779/A231T	P53779	MAPK10	MK10_HUMAN	A231T	542	A-loop;APE-motif	-	-	TRYYRaEVILG	0.202	0.519	0.28	0.658	0.661	0.397	0.535	0.554	0.628	0.453	0.506	3	NA
P53779/E367K	P53779	MAPK10	MK10_HUMAN	E367K	860	C-term-αI	-	-	WYDPAeEAPPP	0.288	0.294	0.418	0.669	0.541	0.56	0.594	0.385	0.497	0.553	0.464	3	NA
P54646/E298K	P54646	PRKAA2	AAPK2_HUMAN	E298K	882	C-term-αI	-	-	VKEVCeFECTE	0.406	0.201	0.393	0.664	0.571	0.422	0.532	0.425	0.515	0.488	0.383	3	NA
P54646/P278S	P54646	PRKAA2	AAPK2_HUMAN	P278S	862	C-term-αI	-	-	PSYLFpDPSYD	0.178	0.398	0.424	0.672	0.683	0.516	0.627	0.524	0.65	0.561	0.482	3	NA
P54646/V287I	P54646	PRKAA2	AAPK2_HUMAN	V287I	871	C-term-αI	-	-	SYDANvDDEAV	0.895	0.024	0.081	0.161	0.144	0.434	0.183	0.12	0.112	0.72	0.128	3	NA
P54756/E757K	P54756	EPHA5	EPHA5_HUMAN	E757K	238	β5/αD-loop	-	-	VTEYMeGSLDT	0.404	0.288	0.307	0.44	0.355	0.463	0.379	0.312	0.324	0.617	0.423	3	NA
P54760/P846S	P54760	EPHB4	EPHB4_HUMAN	P846S	802	αG/αH-loop	-	-	PPPDCpSLHQL	0.226	0.574	0.2	0.683	0.701	0.342	0.551	0.634	0.695	0.302	0.515	3	NA
P54760/V718M	P54760	EPHB4	EPHB4_HUMAN	V718M	372	αE	-	-	TVIQLvMLRGI	0.326	0.256	0.419	0.421	0.389	0.506	0.409	0.325	0.341	0.609	0.394	3	NA
P54762/D771N	P54762	EPHB1	EPHB1_HUMAN	D771N	496	A-loop	-	-	SRYLQdTSDPT	0.527	0.177	0.297	0.347	0.327	0.48	0.291	0.239	0.232	0.666	0.32	3	NA
P54762/G590E	P54762	EPHB1	EPHB1_HUMAN	G590E	1	N-term-β1	-	-	GRGSPgKIYID	0.345	0.226	0.428	0.578	0.575	0.485	0.553	0.375	0.557	0.518	0.526	3	NA
P54762/Q839H	P54762	EPHB1	EPHB1_HUMAN	Q839H	661	αG/αH-loop	-	-	INAIEqYRLPP	0.316	0.24	0.444	0.524	0.449	0.617	0.533	0.306	0.362	0.719	0.395	3	NA
P54762/R767C	P54762	EPHB1	EPHB1_HUMAN	R767C	485	A-loop	-	-	DFGLSrLQDDT	0.117	0.412	0.471	0.805	0.827	0.476	0.786	0.574	0.867	0.47	0.523	3	NA
P54762/R799C	P54762	EPHB1	EPHB1_HUMAN	R799C	549	A-loop	-	-	EAIAYrFTSAS	0.163	0.419	0.418	0.662	0.637	0.454	0.577	0.473	0.648	0.501	0.444	3	NA
P54762/R883Q	P54762	EPHB1	EPHB1_HUMAN	R883Q	855	αI	-	-	LDKMIrPASLK	0.359	0.228	0.413	0.497	0.431	0.537	0.495	0.3	0.389	0.659	0.312	3	NA
P54764/G821R	P54764	EPHA4	EPHA4_HUMAN	G821R	604	αF/αG-loop	-	-	EVMSYgRPYWD	0.26	0.355	0.385	0.616	0.593	0.475	0.592	0.428	0.549	0.581	0.573	3	NA
P54764/R610Q	P54764	EPHA4	EPHA4_HUMAN	R610Q	20	N-term-β1	-	-	PNQAVrFAKEI	0.568	0.174	0.258	0.381	0.348	0.511	0.43	0.244	0.28	0.656	0.201	3	NA
P54764/S809N	P54764	EPHA4	EPHA4_HUMAN	S809N	590	αF	-	-	ASDVWsGIVMW	0.306	0.452	0.241	0.534	0.506	0.338	0.426	0.517	0.49	0.425	0.392	3	NA
P57058/A230T	P57058	HUNK	HUNK_HUMAN	A230T	541	A-loop	-	-	GSPAYaPELLA	0.467	0.203	0.33	0.376	0.332	0.549	0.36	0.267	0.299	0.668	0.265	3	NA
P57059/E123A	P57059	SIK1	SIK1_HUMAN	E123A	366	αE	-	-	NGHLSeEARKK	0.152	0.45	0.398	0.718	0.709	0.546	0.68	0.528	0.669	0.58	0.552	3	NA
P80192/A142V	P80192	MAP3K9	M3K9_HUMAN	A142V	27	N-term-β1	-	-	LEIDFaLTLEE	0.645	0.126	0.228	0.318	0.259	0.429	0.306	0.253	0.299	0.712	0.19	3	NA
Q00526/R169C	Q00526	CDK3	CDK3_HUMAN	R169C	541	A-loop	-	-	VTLWYrPEILL	0.14	0.429	0.431	0.665	0.666	0.524	0.582	0.489	0.632	0.515	0.456	3	NA
Q00535/P100S	Q00535	CDK5	CDK5_HUMAN	P100S	366	αE	-	-	NGDLDpIVKSF	0.332	0.179	0.489	0.449	0.358	0.601	0.483	0.262	0.282	0.738	0.328	3	NA
Q01974/P712S	Q01974	ROR2	ROR2_HUMAN	P712S	677	αG/αH-loop	-	-	NRQVLpPDDCP	0.374	0.243	0.383	0.478	0.384	0.488	0.497	0.309	0.331	0.645	0.343	3	NA
Q01974/R657C	Q01974	ROR2	ROR2_HUMAN	R657C	539	A-loop	-	-	SLLPIrMAPEA	0.188	0.453	0.359	0.724	0.681	0.438	0.561	0.508	0.711	0.422	0.463	3	NA
Q02156/R464Q	Q02156	PRKCE	KPCE_HUMAN	R464Q	162	αC/β4-loop	-	-	ILALArHPYLT	0.703	0.146	0.151	0.338	0.313	0.427	0.287	0.358	0.303	0.542	0.227	3	NA
Q02750/N122D	Q02750	MAP2K1	MP2K1_HUMAN	N122D	162	αC/β4-loop	-	-	VLHECnPYIVG	0.732	0.121	0.147	0.325	0.305	0.359	0.249	0.359	0.305	0.518	0.281	3	oncogene
Q02750/R201H	Q02750	MAP2K1	MP2K1_HUMAN	R201H	463	Catalytic-loop	-	-	ILVNSrEIKLC	0.543	0.16	0.297	0.234	0.231	0.509	0.298	0.219	0.209	0.63	0.176	3	oncogene
Q02750/V127M	Q02750	MAP2K1	MP2K1_HUMAN	V127M	179	αC/β4-loop	-	-	NSPYIvFYGAF	0.242	0.334	0.424	0.604	0.571	0.569	0.545	0.435	0.497	0.593	0.587	3	oncogene
Q02763/E872K	Q02763	TEK	TIE2_HUMAN	E872K	149	αC	-	-	RDFAGeEVLCK	0.261	0.485	0.255	0.651	0.567	0.302	0.533	0.533	0.65	0.374	0.446	3	NA
Q02763/L819R	Q02763	TEK	TIE2_HUMAN	L819R	26	N-term-β1	-	-	TIYPVlWNDIK	0.146	0.396	0.458	0.729	0.689	0.516	0.628	0.454	0.641	0.598	0.525	3	NA
Q02763/R842H	Q02763	TEK	TIE2_HUMAN	R842H	53	β2	-	-	QVLKArKKDGL	0.71	0.085	0.205	0.169	0.176	0.514	0.25	0.199	0.208	0.701	0.147	3	NA
Q02779/R253H	Q02779	MAP3K10	M3K10_HUMAN	R253H	485	A-loop	-	-	DFGLArWHKTT	0.084	0.378	0.539	0.816	0.851	0.579	0.785	0.489	0.854	0.565	0.538	3	NA
Q02779/T247M	Q02779	MAP3K10	M3K10_HUMAN	T247M	478	Catalytic-loop	-	-	TVLKItFGLAR	0.253	0.371	0.376	0.65	0.661	0.526	0.543	0.494	0.586	0.586	0.605	3	NA
Q02846/E779K	Q02846	GUCY2D	GUC2D_HUMAN	E779K	812	αH	-	-	DQAPVeILLMK	0.335	0.255	0.41	0.507	0.473	0.508	0.485	0.379	0.444	0.589	0.417	3	NA
Q04759/P439S	Q04759	PRKCQ	KPCT_HUMAN	P439S	172	αC/β4-loop	-	-	LAWEHpLTHMF	0.351	0.296	0.353	0.491	0.429	0.499	0.497	0.369	0.427	0.605	0.519	3	NA
Q04759/R644W	Q04759	PRKCQ	KPCT_HUMAN	R644W	862	C-term-αI	-	-	WEELErEIDPP	0.236	0.327	0.437	0.648	0.577	0.52	0.595	0.457	0.616	0.519	0.404	3	NA
Q04759/T442M	Q04759	PRKCQ	KPCT_HUMAN	T442M	179	αC/β4-loop	-	-	EHPFLtMFCTF	0.509	0.211	0.28	0.327	0.294	0.544	0.332	0.272	0.252	0.65	0.237	3	NA
Q04771/D503N	Q04771	ACVR1	ACVR1_HUMAN	D503N	859	C-term-αI	-	-	IDNSLdLKTDC	0.622	0.148	0.23	0.328	0.319	0.51	0.319	0.25	0.233	0.649	0.27	3	oncogene
Q04771/P430L	Q04771	ACVR1	ACVR1_HUMAN	P430L	624	αF/αG-loop	-	-	EDYKPpYDVVP	0.341	0.415	0.244	0.524	0.52	0.346	0.401	0.516	0.53	0.337	0.457	3	oncogene
Q05655/G535W	Q05655	PRKCD	KPCD_HUMAN	G535W	592	αF	-	-	DWWSFgLLYEM	0.201	0.533	0.266	0.648	0.696	0.318	0.606	0.603	0.665	0.385	0.528	3	NA
Q06187/D426N	Q06187	BTK	BTK_HUMAN	D426N	91	β3	-	-	WRGQYdAIKMI	0.588	0.219	0.193	0.367	0.361	0.388	0.287	0.331	0.276	0.49	0.263	3	oncogene, TSG
Q06187/R490C	Q06187	BTK	BTK_HUMAN	R490C	355	αD/αE-loop	-	-	YLREMrRFQTQ	0.364	0.229	0.407	0.417	0.365	0.501	0.434	0.288	0.369	0.663	0.252	3	oncogene, TSG
Q06187/R525Q	Q06187	BTK	BTK_HUMAN	R525Q	430	Catalytic-loop	-	decrease	RDLAArCLVND	0.226	0.538	0.237	0.693	0.693	0.376	0.562	0.573	0.634	0.371	0.422	3	oncogene, TSG
Q06187/R641H	Q06187	BTK	BTK_HUMAN	R641H	832	αH/αI-loop	-	-	EKADErTFKIL	0.178	0.587	0.235	0.654	0.639	0.349	0.512	0.604	0.617	0.357	0.438	3	oncogene, TSG
Q06418/R659W	Q06418	TYRO3	TYRO3_HUMAN	R659W	430	Catalytic-loop	-	-	RDLAArCMLAE	0.116	0.69	0.195	0.814	0.8	0.281	0.626	0.689	0.822	0.252	0.508	3	NA
Q08881/A484V	Q08881	ITK	ITK_HUMAN	A484V	428	Catalytic-loop	-	-	IHRDLaRNCLV	0.128	0.641	0.231	0.803	0.853	0.363	0.585	0.71	0.812	0.298	0.568	3	fusion
Q08881/G461D	Q08881	ITK	ITK_HUMAN	G461D	376	αE	-	-	AETLLgCLDVC	0.864	0.041	0.095	0.183	0.165	0.43	0.217	0.132	0.086	0.696	0.202	3	fusion
Q09013/G78R	Q09013	DMPK	DMPK_HUMAN	G78R	38	β1;Gly-rich-loop	-	-	ILKVIgGAFSE	0.062	0.531	0.408	0.845	0.755	0.422	0.713	0.568	0.759	0.466	0.67	3	NA
Q12852/V331M	Q12852	MAP3K12	M3K12_HUMAN	V331M	681	αG/αH-loop	-	-	SLHLPvSSCPD	0.66	0.115	0.224	0.255	0.216	0.499	0.282	0.229	0.24	0.646	0.24	3	NA
Q13177/S470F	Q13177	PAK2	PAK2_HUMAN	S470F	802	αG/αH-loop	-	-	NPEKLsIFRDF	0.185	0.552	0.263	0.776	0.784	0.418	0.651	0.609	0.721	0.413	0.534	3	NA
Q13188/D253N	Q13188	STK3	STK3_HUMAN	D253N	816	αH	-	-	SDDFTdVKKCL	0.526	0.21	0.264	0.344	0.31	0.422	0.328	0.313	0.275	0.609	0.354	3	NA
Q13233/N1374S	Q13233	MAP3K1	M3K1_HUMAN	N1374S	431	Catalytic-loop	-	-	DVKGAnLIDST	0.08	0.671	0.249	0.802	0.882	0.335	0.664	0.683	0.8	0.403	0.624	3	oncogene, TSG
Q13308/S1053F	Q13308	PTK7	PTK7_HUMAN	S1053F	834	αI	-	-	PKDRPsSEIAS	0.406	0.339	0.255	0.489	0.402	0.367	0.431	0.424	0.382	0.531	0.291	3	NA
Q13418/E366K	Q13418	ILK	ILK_HUMAN	E366K	551	A-loop	-	-	LQKKPeTNRRS	0.667	0.109	0.224	0.252	0.236	0.466	0.242	0.243	0.241	0.663	0.198	3	NA
Q13554/R66C	Q13554	CAMK2B	KCC2B_HUMAN	R66C	155	αC/β4-loop	-	-	EARICrLKHSN	0.214	0.322	0.464	0.589	0.621	0.479	0.598	0.406	0.582	0.539	0.428	3	NA
Q14004/R686H	Q14004	CDK13	CDK13_HUMAN	R686H	10	N-term-β1	-	-	KICGPrGETKE	0.287	0.305	0.408	0.615	0.569	0.548	0.599	0.401	0.415	0.605	0.377	3	NA
Q14164/R117C	Q14164	IKBKE	IKKE_HUMAN	R117C	379	αE	-	-	FLVVLrVVAGM	0.369	0.183	0.448	0.478	0.419	0.559	0.488	0.285	0.345	0.641	0.231	3	NA
Q14164/R143C	Q14164	IKBKE	IKKE_HUMAN	R143C	434	Catalytic-loop	-	-	PGNIMrVGEEG	0.442	0.165	0.393	0.383	0.351	0.548	0.419	0.247	0.329	0.664	0.225	3	NA
Q14289/A612T	Q14289	PTK2B	FAK2_HUMAN	A612T	592	αF	-	-	DVWMFaCMWEI	0.581	0.19	0.229	0.317	0.313	0.367	0.292	0.264	0.239	0.535	0.238	3	NA
Q14289/P506S	Q14289	PTK2B	FAK2_HUMAN	P506S	238	β5/αD-loop	-	-	IMELYpGELGH	0.522	0.169	0.309	0.234	0.198	0.398	0.265	0.23	0.21	0.664	0.345	3	NA
Q14289/Y664C	Q14289	PTK2B	FAK2_HUMAN	Y664C	825	αH/αI-loop	-	-	TRCWDyPSDRP	0.187	0.399	0.415	0.679	0.646	0.48	0.628	0.503	0.592	0.541	0.556	3	NA
Q15208/R78C	Q15208	STK38	STK38_HUMAN	R78C	20	N-term-β1	-	-	ETEFLrKRTRL	0.181	0.388	0.432	0.719	0.68	0.52	0.702	0.474	0.641	0.517	0.489	3	NA
Q15303/D776N	Q15303	ERBB4	ERBB4_HUMAN	D776N	162	αC/β4-loop	-	-	IMASMdPHLVR	0.478	0.297	0.225	0.435	0.429	0.363	0.36	0.517	0.403	0.401	0.335	3	oncogene, TSG
Q15303/E691K	Q15303	ERBB4	ERBB4_HUMAN	E691K	3	N-term-β1	-	-	LRRFLeELVEP	0.564	0.169	0.267	0.35	0.284	0.547	0.281	0.252	0.312	0.636	0.284	3	oncogene, TSG
Q15303/G907A	Q15303	ERBB4	ERBB4_HUMAN	G907A	592	αF	-	-	DVWSYgTIWEL	0.292	0.316	0.392	0.489	0.508	0.408	0.484	0.406	0.452	0.502	0.369	3	oncogene, TSG
Q15303/L770Q	Q15303	ERBB4	ERBB4_HUMAN	L770Q	151	αC	-	-	FMDEAlMASMD	0.551	0.155	0.293	0.389	0.3	0.486	0.317	0.293	0.303	0.652	0.279	3	oncogene, TSG
Q15303/L868F	Q15303	ERBB4	ERBB4_HUMAN	L868F	492	A-loop	-	-	GLARLlGDEKE	0.444	0.276	0.28	0.522	0.435	0.454	0.442	0.406	0.401	0.579	0.388	3	oncogene, TSG
Q15303/M958I	Q15303	ERBB4	ERBB4_HUMAN	M958I	824	αH/αI-loop	-	-	MVKCWmDADSR	0.319	0.386	0.295	0.457	0.425	0.436	0.415	0.358	0.388	0.57	0.397	3	oncogene, TSG
Q15303/P759L	Q15303	ERBB4	ERBB4_HUMAN	P759L	119	αC	-	-	NETTGpANVEF	0.362	0.239	0.399	0.492	0.467	0.502	0.459	0.339	0.379	0.653	0.43	3	oncogene, TSG
Q15303/P759S	Q15303	ERBB4	ERBB4_HUMAN	P759S	119	αC	-	-	NETTGpANVEF	0.368	0.224	0.408	0.418	0.386	0.496	0.438	0.32	0.357	0.619	0.357	3	oncogene, TSG
Q15303/P925L	Q15303	ERBB4	ERBB4_HUMAN	P925L	637	αF/αG-loop	-	-	PYDGIpREIPD	0.424	0.288	0.288	0.415	0.458	0.481	0.366	0.343	0.342	0.614	0.338	3	oncogene, TSG
Q15303/P981S	Q15303	ERBB4	ERBB4_HUMAN	P981S	858	αI	-	-	RMARDpRYLVI	0.235	0.362	0.403	0.548	0.574	0.56	0.59	0.445	0.55	0.596	0.486	3	oncogene, TSG
Q15303/R979Q	Q15303	ERBB4	ERBB4_HUMAN	R979Q	856	αI	-	-	FSRMArPQRYL	0.639	0.153	0.208	0.268	0.247	0.534	0.306	0.207	0.207	0.726	0.151	3	oncogene, TSG
Q15303/R992H	Q15303	ERBB4	ERBB4_HUMAN	R992H	869	C-term-αI	-	-	IQGDDrKLPSP	0.577	0.177	0.246	0.259	0.229	0.499	0.286	0.194	0.178	0.687	0.21	3	oncogene, TSG
Q15303/V949I	Q15303	ERBB4	ERBB4_HUMAN	V949I	813	αH	-	-	ICTIDvMVMVK	0.86	0.055	0.085	0.114	0.117	0.411	0.16	0.163	0.101	0.668	0.139	3	oncogene, TSG
Q15349/A591V	Q15349	RPS6KA2	KS6A2_HUMAN	A591V	584	αF	-	-	QGYDAaDIWSL	0.374	0.292	0.334	0.389	0.367	0.48	0.395	0.302	0.286	0.59	0.292	3	NA
Q15349/P119S	Q15349	RPS6KA2	KS6A2_HUMAN	P119S	172	αC/β4-loop	-	-	AEVNHpIVKLH	0.241	0.397	0.362	0.581	0.613	0.494	0.572	0.456	0.59	0.53	0.623	3	NA
Q15349/R500Q	Q15349	RPS6KA2	KS6A2_HUMAN	R500Q	354	αD/αE-loop	-	-	LDRILrRYFSE	0.844	0.087	0.069	0.139	0.15	0.424	0.171	0.156	0.145	0.677	0.073	3	NA
Q15349/R551Q	Q15349	RPS6KA2	KS6A2_HUMAN	R551Q	476	Catalytic-loop	-	-	SPESIrCDFGF	0.311	0.26	0.429	0.514	0.519	0.584	0.538	0.327	0.4	0.622	0.311	3	NA
Q15349/R562C	Q15349	RPS6KA2	KS6A2_HUMAN	R562C	493	A-loop	-	-	FAKQLrGNGLL	0.217	0.277	0.506	0.726	0.668	0.624	0.695	0.332	0.591	0.66	0.537	3	NA
Q15349/T222M	Q15349	RPS6KA2	KS6A2_HUMAN	T222M	536	A-loop	-	-	YSFCGtEYMAP	0.114	0.761	0.125	0.775	0.789	0.284	0.622	0.721	0.833	0.237	0.515	3	NA
Q15375/D678N	Q15375	EPHA7	EPHA7_HUMAN	D678N	145	αC	-	-	EKQRRdLCEAS	0.582	0.187	0.231	0.35	0.335	0.484	0.314	0.245	0.239	0.659	0.303	3	inconclusive
Q15375/G642E	Q15375	EPHA7	EPHA7_HUMAN	G642E	40	β1;Gly-rich-loop	-	-	RVIGAgFGEVC	0.081	0.756	0.163	0.841	0.856	0.305	0.642	0.752	0.848	0.306	0.638	3	inconclusive
Q15375/P903S	Q15375	EPHA7	EPHA7_HUMAN	P903S	864	C-term-αI	-	-	NSLKTpGTCSR	0.356	0.242	0.402	0.404	0.465	0.49	0.437	0.336	0.36	0.622	0.37	3	inconclusive
Q15375/S831F	Q15375	EPHA7	EPHA7_HUMAN	S831F	601	αF	-	-	MWEVMsGERPY	0.316	0.344	0.34	0.583	0.515	0.502	0.536	0.444	0.456	0.553	0.45	3	inconclusive
Q15746/R1549H	Q15746	MYLK	MYLK_HUMAN	R1549H	252	αD	-	-	GELFErIDEDF	0.371	0.347	0.281	0.454	0.383	0.52	0.399	0.296	0.308	0.65	0.247	3	NA
Q15831/A241P	Q15831	STK11	STK11_HUMAN	A241P	591	αF	-	-	VDIWSaVTLYN	0.266	0.4	0.334	0.673	0.568	0.473	0.511	0.52	0.63	0.507	0.495	3	TSG
Q15831/E165Q	Q15831	STK11	STK11_HUMAN	E165Q	389	αE	-	-	LIDGLeLHSQG	0.652	0.134	0.214	0.22	0.222	0.481	0.279	0.229	0.221	0.65	0.206	3	TSG
Q15831/E199D	Q15831	STK11	STK11_HUMAN	E199D	485	A-loop	-	-	DLGVAeLHPFA	0.275	0.266	0.46	0.57	0.599	0.549	0.593	0.395	0.605	0.602	0.359	3	TSG
Q15831/G196R	Q15831	STK11	STK11_HUMAN	G196R	481	A-loop;DFG-motif	-	-	KISDLgAEALH	0.067	0.464	0.47	0.824	0.842	0.453	0.764	0.567	0.811	0.483	0.627	3	TSG
Q15831/P324L	Q15831	STK11	STK11_HUMAN	P324L	867	C-term-αI	-	-	PVPIPpPDTKD	0.299	0.314	0.387	0.523	0.526	0.491	0.483	0.432	0.505	0.586	0.515	3	TSG
Q15835/P290L	Q15835	GRK1	GRK1_HUMAN	P290L	365	αD/αE-loop	-	-	ENPGFpPRALF	0.682	0.136	0.183	0.262	0.19	0.399	0.222	0.227	0.203	0.641	0.284	3	NA
Q16288/P526L	Q16288	NTRK3	NTRK3_HUMAN	P526L	18	N-term-β1	-	-	HNCHKpTYVQH	0.374	0.309	0.317	0.551	0.475	0.549	0.484	0.353	0.435	0.581	0.441	3	oncogene, fusion
Q16584/H230Y	Q16584	MAP3K11	M3K11_HUMAN	H230Y	393	αE	-	-	GMHYLhEALVP	0.097	0.679	0.223	0.77	0.744	0.283	0.599	0.68	0.741	0.262	0.514	3	NA
Q16584/I176V	Q16584	MAP3K11	M3K11_HUMAN	I176V	178	αC/β4-loop	-	-	LAHPNiALKAV	0.565	0.137	0.299	0.3	0.251	0.527	0.287	0.219	0.186	0.672	0.322	3	NA
Q16620/M620I	Q16620	NTRK2	NTRK2_HUMAN	M620I	237	β5/αD-loop	-	-	MVFEYmHGDLN	0.264	0.363	0.372	0.589	0.583	0.505	0.533	0.445	0.536	0.542	0.555	3	oncogene, fusion
Q16620/R675H	Q16620	NTRK2	NTRK2_HUMAN	R675H	424	Catalytic-loop;HrD-motif	-	-	QHFVHrLATRN	0.167	0.436	0.397	0.683	0.702	0.537	0.631	0.492	0.72	0.491	0.475	3	oncogene, fusion
Q16620/V673M	Q16620	NTRK2	NTRK2_HUMAN	V673M	419	Catalytic-loop	-	-	ASQHFvRDLAT	0.298	0.365	0.337	0.543	0.448	0.442	0.467	0.434	0.427	0.556	0.479	3	oncogene, fusion
Q16644/P28A	Q16644	MAPKAPK3	MAPK3_HUMAN	P28A	12	N-term-β1	-	-	GLGGApGRREP	0.713	0.177	0.11	0.224	0.282	0.414	0.264	0.29	0.254	0.568	0.173	3	NA
Q16644/R112L	Q16644	MAPKAPK3	MAPK3_HUMAN	R112L	218	β4/β5-loop	-	-	MHHGKrLLIIM	0.351	0.256	0.393	0.473	0.455	0.508	0.48	0.336	0.4	0.585	0.389	3	NA
Q16832/F842L	Q16832	DDR2	DDR2_HUMAN	F842L	842	αI	-	-	KNRPSfEIHLL	0.227	0.368	0.404	0.631	0.535	0.497	0.505	0.456	0.503	0.526	0.497	3	oncogene
Q16832/P815L	Q16832	DDR2	DDR2_HUMAN	P815L	677	αG/αH-loop	-	-	RQTYLpPAICP	0.45	0.246	0.304	0.506	0.448	0.498	0.474	0.397	0.426	0.575	0.429	3	oncogene
Q16832/R631W	Q16832	DDR2	DDR2_HUMAN	R631W	156	αC/β4-loop	-	-	IKIMSrKDPNI	0.143	0.412	0.445	0.74	0.754	0.552	0.696	0.43	0.678	0.573	0.538	3	oncogene
Q16832/R806Q	Q16832	DDR2	DDR2_HUMAN	R806Q	660	αG	-	-	TGEFFrQGRQT	0.495	0.208	0.296	0.329	0.41	0.509	0.418	0.273	0.283	0.628	0.194	3	oncogene
Q32MK0/D599N	Q32MK0	MYLK3	MYLK3_HUMAN	D599N	251	αD	-	-	GGELFdITDEK	0.265	0.333	0.402	0.584	0.567	0.462	0.519	0.428	0.503	0.54	0.554	3	NA
Q32MK0/V515A	Q32MK0	MYLK3	MYLK3_HUMAN	V515A	28	N-term-β1	-	-	SAGYEvQHEVL	0.195	0.429	0.376	0.674	0.682	0.514	0.59	0.472	0.618	0.473	0.507	3	NA
Q32MK0/V645I	Q32MK0	MYLK3	MYLK3_HUMAN	V645I	435	Catalytic-loop	-	-	ENILCvQTGHQ	0.608	0.187	0.204	0.338	0.248	0.468	0.292	0.246	0.282	0.645	0.236	3	NA
Q38SD2/A1497V	Q38SD2	LRRK1	LRRK1_HUMAN	A1497V	816	αH	-	-	FRRLQaMMECW	0.557	0.187	0.256	0.267	0.229	0.457	0.258	0.245	0.216	0.67	0.25	3	NA
Q38SD2/S1302F	Q38SD2	LRRK1	LRRK1_HUMAN	S1302F	144	αC	-	-	AMKNFsFRQEA	0.405	0.237	0.359	0.485	0.454	0.435	0.448	0.427	0.419	0.57	0.366	3	NA
Q52WX2/R294C	Q52WX2	SBK1	SBK1_HUMAN	R294C	821	αH	-	-	LRMFQrLALEP	0.225	0.413	0.361	0.599	0.59	0.441	0.506	0.508	0.524	0.495	0.354	3	NA
Q59H18/I594F	Q59H18	TNNI3K	TNI3K_HUMAN	I594F	432	Catalytic-loop	-	-	LNSHNiLYEDG	0.235	0.342	0.423	0.641	0.544	0.474	0.5	0.417	0.499	0.583	0.441	3	NA
Q59H18/P664L	Q59H18	TNNI3K	TNI3K_HUMAN	P664L	610	αF/αG-loop	-	-	LTGEIpAHLKP	0.295	0.486	0.219	0.581	0.582	0.377	0.507	0.535	0.573	0.41	0.494	3	NA
Q5JZY3/V712I	Q5JZY3	EPHA10	EPHAA_HUMAN	V712I	185	β4	-	-	VRLEGvTRGST	0.651	0.131	0.218	0.215	0.209	0.465	0.246	0.187	0.224	0.651	0.189	3	NA
Q5S007/A2126T	Q5S007	LRRK2	LRRK2_HUMAN	A2126T	843	αI	-	-	ERPTSaVFDIL	0.799	0.089	0.112	0.125	0.138	0.433	0.153	0.171	0.105	0.625	0.103	3	NA
Q5TCX8/S319F	Q5TCX8	MAP3K21	M3K21_HUMAN	S319F	549	A-loop	-	-	EVIKSsFSKGS	0.311	0.281	0.409	0.579	0.55	0.501	0.488	0.428	0.453	0.604	0.418	3	NA
Q5TCY1/D10N	Q5TCY1	TTBK1	TTBK1_HUMAN	D10N	6	N-term-β1	-	-	AAALKdTNMSG	0.787	0.107	0.106	0.202	0.199	0.367	0.222	0.234	0.147	0.621	0.176	3	NA
Q6J9G0/P331S	Q6J9G0	STYK1	STYK1_HUMAN	P331S	637	αF/αG-loop	-	-	PYPEVpTSILE	0.47	0.266	0.264	0.43	0.395	0.462	0.394	0.329	0.297	0.615	0.307	3	NA
Q6J9G0/R164Q	Q6J9G0	STYK1	STYK1_HUMAN	R164Q	149	αC	-	-	QDFLGrQFHQY	0.736	0.128	0.136	0.299	0.268	0.407	0.27	0.257	0.294	0.596	0.17	3	NA
Q6P0Q8/R530W	Q6P0Q8	MAST2	MAST2_HUMAN	R530W	53	β2	-	-	AVFLVrKSTRQ	0.231	0.26	0.508	0.582	0.634	0.553	0.625	0.412	0.537	0.684	0.377	3	NA
Q6ZN16/R677Q	Q6ZN16	MAP3K15	M3K15_HUMAN	R677Q	91	β3	-	-	LSNQVrAIKEI	0.569	0.218	0.214	0.359	0.326	0.493	0.339	0.287	0.313	0.547	0.209	3	NA
Q6ZN16/S796L	Q6ZN16	MAP3K15	M3K15_HUMAN	S796L	484	A-loop	-	-	SDFGTsRLAGV	0.204	0.475	0.321	0.749	0.744	0.552	0.701	0.539	0.713	0.493	0.539	3	NA
Q7KZI7/R268C	Q7KZI7	MARK2	MARK2_HUMAN	R268C	695	αG/αH-loop	-	-	LRGKYrPFYMS	0.236	0.445	0.318	0.597	0.571	0.342	0.504	0.511	0.583	0.412	0.379	3	NA
Q7RTN6/K239E	Q7RTN6	STRADA	STRAA_HUMAN	K239E	530	A-loop	ub	-	PKYSVkLPWLS	0.503	0.263	0.234	0.405	0.51	0.379	0.38	0.4	0.422	0.46	0.223	3	NA
Q7RTN6/W144C	Q7RTN6	STRADA	STRAA_HUMAN	W144C	228	β5	-	-	ADNELwVTSFM	0.191	0.38	0.428	0.667	0.584	0.509	0.554	0.52	0.566	0.507	0.54	3	NA
Q7Z2Y5/R159Q	Q7Z2Y5	NRK	NRK_HUMAN	R159Q	379	αE	-	-	IAYICrILQGL	0.281	0.265	0.455	0.596	0.539	0.577	0.565	0.367	0.466	0.646	0.3	3	NA
Q86Z02/R488Q	Q86Z02	HIPK1	HIPK1_HUMAN	R488Q	802	αG/αH-loop	-	-	AEKADrEYIDL	0.183	0.436	0.381	0.649	0.663	0.547	0.567	0.418	0.637	0.58	0.365	3	NA
Q8IU85/P243S	Q8IU85	CAMK1D	KCC1D_HUMAN	P243S	695	αG/αH-loop	-	-	YEFDSpWDDIS	0.292	0.413	0.295	0.556	0.547	0.374	0.535	0.504	0.506	0.401	0.489	3	NA
Q8IU85/R126C	Q8IU85	CAMK1D	KCC1D_HUMAN	R126C	379	αE	-	-	ASTLIrVLDAV	0.737	0.098	0.165	0.225	0.265	0.477	0.281	0.224	0.179	0.665	0.125	3	NA
Q8IVH8/T145M	Q8IVH8	MAP4K3	M4K3_HUMAN	T145M	435	Catalytic-loop	-	-	ANILLtNGHVK	0.28	0.357	0.364	0.545	0.572	0.456	0.462	0.454	0.563	0.581	0.451	3	NA
Q8IVW4/Q56R	Q8IVW4	CDKL3	CDKL3_HUMAN	Q56R	156	αC/β4-loop	-	-	IKFLKqHHENL	0.562	0.189	0.249	0.331	0.32	0.544	0.392	0.238	0.223	0.679	0.339	3	NA
Q8IWQ3/T114M	Q8IWQ3	BRSK2	BRSK2_HUMAN	T114M	365	αD/αE-loop	-	-	KKGRLtKEARK	0.57	0.164	0.266	0.278	0.272	0.397	0.303	0.27	0.256	0.603	0.254	3	NA
Q8IY84/E189K	Q8IY84	NIM1K	NIM1_HUMAN	E189K	402	Catalytic-loop	-	-	VKHMHeQIIHR	0.771	0.087	0.142	0.2	0.211	0.414	0.223	0.204	0.185	0.613	0.215	3	NA
Q8IY84/G81R	Q8IY84	NIM1K	NIM1_HUMAN	G81R	38	β1;Gly-rich-loop	-	-	IRGEIgGNFSQ	0.094	0.561	0.345	0.827	0.747	0.356	0.681	0.598	0.746	0.36	0.67	3	NA
Q8IY84/R75Q	Q8IY84	NIM1K	NIM1_HUMAN	R75Q	32	β1	-	-	RIGFYrRGEIG	0.493	0.172	0.336	0.346	0.322	0.509	0.398	0.232	0.24	0.615	0.175	3	NA
Q8IZL9/G8S	Q8IZL9	CDK20	CDK20_HUMAN	G8S	35	β1	-	-	QYCILgIGEGA	0.48	0.208	0.312	0.391	0.378	0.495	0.334	0.299	0.296	0.608	0.3	3	NA
Q8N568/A642T	Q8N568	DCLK2	DCLK2_HUMAN	A642T	842	αI	-	-	EARCTaQILSH	0.249	0.356	0.395	0.552	0.508	0.465	0.498	0.428	0.495	0.584	0.484	3	NA
Q8N568/S629G	Q8N568	DCLK2	DCLK2_HUMAN	S629G	820	αH	-	-	AKELIsMLQVN	0.764	0.09	0.146	0.138	0.208	0.417	0.236	0.186	0.178	0.653	0.125	3	NA
Q8N752/S27F	Q8N752	CSNK1A1L	KC1AL_HUMAN	S27F	41	Gly-rich-loop;β1/β2-loop	-	-	KIGSGsGDVYL	0.216	0.452	0.332	0.726	0.73	0.435	0.605	0.563	0.691	0.446	0.519	3	NA
Q8NB16/G289W	Q8NB16	MLKL	MLKL_HUMAN	G289W	240	β5/αD-loop	-	-	EYCELgLRELL	0.18	0.543	0.277	0.774	0.662	0.327	0.566	0.597	0.666	0.367	0.723	3	NA
Q8NE63/E229K	Q8NE63	HIPK4	HIPK4_HUMAN	E229K	660	αG	-	-	VRYICeQGLPK	0.61	0.186	0.204	0.289	0.324	0.453	0.295	0.276	0.209	0.573	0.278	3	NA
Q8NE63/R353C	Q8NE63	HIPK4	HIPK4_HUMAN	R353C	858	αI	-	-	SMQQLrAHETT	0.767	0.059	0.174	0.215	0.228	0.468	0.269	0.188	0.103	0.68	0.17	3	NA
Q8NE63/V72I	Q8NE63	HIPK4	HIPK4_HUMAN	V72I	178	αC/β4-loop	-	-	PEEAHvRFLEF	0.846	0.028	0.126	0.163	0.142	0.384	0.202	0.113	0.087	0.693	0.255	3	NA
Q8NER5/G312D	Q8NER5	ACVR1C	ACV1C_HUMAN	G312D	408	Catalytic-loop	-	-	HMEIVgQGKPA	0.174	0.452	0.374	0.629	0.641	0.473	0.526	0.464	0.582	0.543	0.516	3	NA
Q8NER5/R403Q	Q8NER5	ACVR1C	ACV1C_HUMAN	R403Q	601	αF	-	-	YWEIArCSVGG	0.291	0.316	0.393	0.576	0.498	0.517	0.535	0.358	0.45	0.585	0.382	3	NA
Q8NER5/S427L	Q8NER5	ACVR1C	ACV1C_HUMAN	S427L	644	αG	-	-	VPSDPsEEMRK	0.257	0.41	0.333	0.626	0.655	0.475	0.559	0.496	0.567	0.533	0.5	3	NA
Q8NFD2/R122C	Q8NFD2	ANKK1	ANKK1_HUMAN	R122C	376	αE	-	-	WKLRFrIHETS	0.199	0.396	0.405	0.653	0.638	0.466	0.567	0.48	0.604	0.508	0.45	3	NA
Q8NG66/H316Y	Q8NG66	NEK11	NEK11_HUMAN	H316Y	881	C-term-αI	-	-	QKEAAhINAMQ	0.685	0.11	0.205	0.399	0.386	0.437	0.373	0.258	0.297	0.6	0.223	3	NA
Q8TDC3/E89K	Q8TDC3	BRSK1	BRSK1_HUMAN	E89K	162	αC/β4-loop	-	-	ILKLIePHVLK	0.334	0.334	0.333	0.592	0.533	0.392	0.478	0.51	0.52	0.453	0.425	3	NA
Q8TDX7/R76H	Q8TDX7	NEK7	NEK7_HUMAN	R76H	143	αC	-	-	MDAKArDCIKE	0.265	0.334	0.401	0.538	0.512	0.486	0.497	0.404	0.422	0.579	0.445	3	NA
Q8WU08/E156K	Q8WU08	STK32A	ST32A_HUMAN	E156K	439	Catalytic-loop	-	-	NILLDeGHVHI	0.326	0.215	0.458	0.452	0.477	0.544	0.482	0.29	0.398	0.659	0.396	3	NA
Q8WU08/I143F	Q8WU08	STK32A	ST32A_HUMAN	I143F	419	Catalytic-loop	-	-	QNQRIiRDMKP	0.177	0.468	0.355	0.683	0.663	0.431	0.585	0.526	0.593	0.486	0.533	3	NA
[truncated: 2,341 more rows]

## Sheet: B UniProt
Table S3B: Prediction results of the predictors on hereditary variants associated with a disease in the UniProt dataset
UserInput	UniProtAcc	GeneName	UniProtID	Mutation	HMMpos	Region	PTM	KnownADR	NeighSites	N	D	A	AILDRvN	AILDvN	AIvNLD	AIvN	LDvNAI	LDvN	AIvLD	RvN	Type	Note	Pubmed	n_PMIDs
O00141/A342V	O00141	SGK1	SGK1_HUMAN	A342V	835	αI	-	-	TKRLGaDDFME	0.731	0.106	0.163	0.172	0.18	0.467	0.237	0.199	0.139	0.678	0.129	VARIANT	A -> V (in dbSNP:rs55932330)	17344846	1
O00141/K127M	O00141	SGK1	SGK1_HUMAN	K127M	96	β3;Catalytic-Lys	-	loss	VFYAVkLQKKA	0	0.998	0.002	0.996	0.996	0.008	0.679	0.994	0.994	0.01	0.51	MUTAGEN	K->M: Abolishes enzymatic activity.	1.16965e+23	3
O00141/S422A	O00141	SGK1	SGK1_HUMAN	S422A	-	-	p	decrease	AFLGFsAPPTD												MUTAGEN	S->A: Low activity.	1.01913e+31	4
O00141/S422D	O00141	SGK1	SGK1_HUMAN	S422D	-	-	p	increase	AFLGFsAPPTD												MUTAGEN	S->D: 10-fold activation.	1.01913e+31	4
O00141/T256A	O00141	SGK1	SGK1_HUMAN	T256A	529	A-loop	p	decrease	NSTTStCGTPE	0.011	0.892	0.097	0.995	0.996	0.265	0.911	0.819	0.989	0.235	0.584	MUTAGEN	T->A: Low activity.	10191262	1
O00141/T256D	O00141	SGK1	SGK1_HUMAN	T256D	529	A-loop	p	decrease	NSTTStCGTPE	0.012	0.148	0.839	0.999	0.993	0.814	0.988	0.302	0.978	0.755	0.569	MUTAGEN	T->D: Low activity.	10191262	1
O00141/T256E	O00141	SGK1	SGK1_HUMAN	T256E	529	A-loop	p	decrease	NSTTStCGTPE	0.004	0.212	0.784	0.988	0.993	0.775	0.987	0.331	0.976	0.737	0.594	MUTAGEN	T->E: Low activity.	10191262	1
O00141/V219I	O00141	SGK1	SGK1_HUMAN	V219I	419	Catalytic-loop	-	-	HSLNIvRDLKP	0.819	0.056	0.125	0.16	0.114	0.357	0.19	0.183	0.1	0.621	0.171	VARIANT	V -> I (in dbSNP:rs34133418)	17344846	1
O00141/Y298A	O00141	SGK1	SGK1_HUMAN	Y298A	631	αF/αG-loop	-	decrease	GLPPFyRNTAE	0.116	0.655	0.23	0.711	0.732	0.319	0.599	0.693	0.751	0.29	0.54	MUTAGEN	Y->A: Abolishes interaction with NEDD4 and NEDD4L.	11696533	1
O00238/C53R	O00238	BMPR1B	BMR1B_HUMAN	C53R	-	-	-	loss	STDGYcTMIEE												VARIANT	C -> R (in AMD3; mouse BMPR1B construct containing this mutation shows loss of GDF5-dependent receptor activation, chicken BMPR1B construct containing this mutation does not show reduced chondrocyte differentiation, mouse BMPR1B construct containing this mutation shows no loss of cell membrane localization; dbSNP:rs863225041)	24129431	1
O00238/D297N	O00238	BMPR1B	BMR1B_HUMAN	D297N	365	αD/αE-loop	-	-	KSTTLdKSMLK	0.644	0.147	0.208	0.242	0.221	0.439	0.238	0.244	0.219	0.624	0.254	VARIANT	D -> N (in a metastatic melanoma sample; somatic mutation)	17344846	1
O00238/I200K	O00238	BMPR1B	BMR1B_HUMAN	I200K	27	N-term-β1	-	loss	LVQRTiKQIQM	0.145	0.412	0.443	0.746	0.72	0.515	0.661	0.564	0.719	0.531	0.584	VARIANT	I -> K (in BDA2; in animal models loss of kinase activity and loss of positive regulation of chondrocyte differentiation; dbSNP:rs121434417)	14523231	1
O00238/K325N	O00238	BMPR1B	BMR1B_HUMAN	K325N	415	Catalytic-loop	-	-	FSTQGkAIAHR	0.271	0.409	0.32	0.569	0.531	0.466	0.477	0.445	0.47	0.498	0.47	VARIANT	K -> N (in BDA1D; acts in a dominant-negative manner; dbSNP:rs869025614)	25758993	1
O00238/R149W	O00238	BMPR1B	BMR1B_HUMAN	R149W	-	-	-	-	LFCYFrKRQET												VARIANT	R -> W (in dbSNP:rs34231464)	17344846	1
O00238/R224H	O00238	BMPR1B	BMR1B_HUMAN	R224H	59	β2/β3-loop	-	-	WMGKWrEKVAV	0.457	0.19	0.353	0.274	0.255	0.538	0.374	0.223	0.193	0.656	0.23	VARIANT	R -> H (in dbSNP:rs35973133)	17344846	1
O00238/R31C	O00238	BMPR1B	BMR1B_HUMAN	R31C	-	-	-	decrease	RPKVLrKCHHH												VARIANT	R -> C (in AMD3; unknown pathological significance; mouse BMPR1B construct containing this mutation shows reduced GDF5-dependent receptor activation, mouse BMPR1B construct containing this mutation shows no loss of cell membrane localization; dbSNP:rs745854387)	26105076	1
O00238/R31H	O00238	BMPR1B	BMR1B_HUMAN	R31H	-	-	-	-	RPKVLrKCHHH												VARIANT	R -> H (in a gastric adenocarcinoma sample; somatic mutation; dbSNP:rs200035802)	17344846	1
O00238/R371Q	O00238	BMPR1B	BMR1B_HUMAN	R371Q	529	A-loop	-	-	IPPNTrGTKRY	0.303	0.364	0.334	0.741	0.688	0.502	0.634	0.421	0.69	0.525	0.275	VARIANT	R -> Q (in dbSNP:rs34970181)	17344846	1
O00238/R486Q	O00238	BMPR1B	BMR1B_HUMAN	R486Q	845	αI	-	-	RLTALrKKTLA	0.346	0.21	0.443	0.483	0.401	0.544	0.447	0.255	0.38	0.648	0.249	VARIANT	R -> Q (in brachydactyly type C and BDA2; with also additional features of symphalangism-1; dbSNP:rs121434419)	16957682	1
O00238/R486W	O00238	BMPR1B	BMR1B_HUMAN	R486W	845	αI	-	-	RLTALrKKTLA	0.21	0.413	0.377	0.647	0.603	0.416	0.6	0.499	0.58	0.428	0.448	VARIANT	R -> W (in BDA2; in animal models no effect on kinase activity but strongly decreased positive regulation of chondrocyte differentiation; dbSNP:rs121434418)	14523231	1
O00311/E209D	O00311	CDC7	CDC7_HUMAN	E209D	-	-	-	-	HDTKIeLKFVQ												VARIANT	E -> D (in dbSNP:rs56327502)	17344846	1
O00311/F162L	O00311	CDC7	CDC7_HUMAN	F162L	382	αE	-	neutral	YMLNLfALKRI	0.779	0.071	0.15	0.18	0.17	0.458	0.24	0.187	0.156	0.678	0.274	VARIANT	F -> L (in dbSNP:rs13447503)	17344846	1
O00311/G112W	O00311	CDC7	CDC7_HUMAN	G112W	162	αC/β4-loop	-	-	CLTVAgQDNVM	0.199	0.499	0.302	0.681	0.689	0.35	0.542	0.588	0.651	0.421	0.54	VARIANT	G -> W (in dbSNP:rs13447493)		0
O00311/I208M	O00311	CDC7	CDC7_HUMAN	I208M	-	-	-	-	THDTKiLLKFV												VARIANT	I -> M (in dbSNP:rs34979509)	17344846	1
O00311/I99V	O00311	CDC7	CDC7_HUMAN	I99V	144	αC	-	-	PTSHPiIAAEL	0.857	0.06	0.083	0.144	0.166	0.335	0.147	0.178	0.137	0.678	0.097	VARIANT	I -> V (in dbSNP:rs13447492)		0
O00311/K441R	O00311	CDC7	CDC7_HUMAN	K441R	701	αG/αH-loop	ub	neutral	TIQAAkFGKSI	0.741	0.124	0.135	0.191	0.226	0.395	0.238	0.167	0.21	0.671	0.099	VARIANT	K -> R (in dbSNP:rs13447539)	17344846	1
O00311/Q23P	O00311	CDC7	CDC7_HUMAN	Q23P	-	-	-	-	QRDRFqEGSLK												VARIANT	Q -> P (in dbSNP:rs13447459)		0
O00311/S498A	O00311	CDC7	CDC7_HUMAN	S498A	761	αG/αH-loop	-	-	TDHKAsLVQTP	0.833	0.084	0.083	0.138	0.155	0.352	0.152	0.203	0.146	0.579	0.15	VARIANT	S -> A (in dbSNP:rs35055915)	17344846	1
O00311/T472I	O00311	CDC7	CDC7_HUMAN	T472I	735	αG/αH-loop	p	-	GMDSStKLTSD	0.438	0.223	0.339	0.397	0.41	0.452	0.359	0.236	0.295	0.665	0.178	VARIANT	T -> I (in dbSNP:rs56381770)	17344846	1
O00418/D609H	O00418	EEF2K	EF2K_HUMAN	D609H	-	-	-	-	AAEAGdQSMIL												VARIANT	D -> H	17344846	1
O00418/H23R	O00418	EEF2K	EF2K_HUMAN	H23R	-	-	-	neutral	SPRAGhGDSDG												VARIANT	H -> R (in dbSNP:rs9935059)	1.54893e+15	2
O00418/P75A	O00418	EEF2K	EF2K_HUMAN	P75A	-	-	-	neutral	SSSGSpNSFHF												VARIANT	P -> A (in dbSNP:rs17841292)	17344846	1
O00418/Q361R	O00418	EEF2K	EF2K_HUMAN	Q361R	-	-	-	-	KCGSPqRTLSG												VARIANT	Q -> R (in dbSNP:rs4783453)	154893349144159	2
O00418/R433W	O00418	EEF2K	EF2K_HUMAN	R433W	-	-	-	-	HLDNHrSENSG												VARIANT	R -> W (in dbSNP:rs56137739)	17344846	1
O00418/S366A	O00418	EEF2K	EF2K_HUMAN	S366A	-	-	p	decrease	QVRTLsSRPPL												MUTAGEN	S->A: Decreased kinase activity.	1.15004e+15	2
O00418/S78A	O00418	EEF2K	EF2K_HUMAN	S78A	-	-	p	decrease	GSPANsHFKEA												MUTAGEN	S->A: Decreased kinase activity.	22216903	1
O00418/T291M	O00418	EEF2K	EF2K_HUMAN	T291M	-	-	-	-	QIHTEtTDFGD												VARIANT	T -> M (in a colorectal adenocarcinoma sample; somatic mutation; dbSNP:rs147978363)	17344846	1
O00418/T348A	O00418	EEF2K	EF2K_HUMAN	T348A	-	-	p	decrease	LQSAKtLRGTE												MUTAGEN	T->A: Decreased kinase activity.	22216903	1
O00444/A226T	O00444	PLK4	PLK4_HUMAN	A226T	691	αG/αH-loop	-	-	NKVVLaYEMPS	0.671	0.149	0.179	0.204	0.226	0.472	0.209	0.198	0.159	0.655	0.142	VARIANT	A -> T (in dbSNP:rs35448573)	17344846	1
O00444/D154A	O00444	PLK4	PLK4_HUMAN	D154A	479	A-loop;DFG-motif	-	loss	NIKIAdGLATQ	0.003	0.991	0.006	0.972	0.972	0.044	0.601	0.964	0.959	0.026	0.623	MUTAGEN	D->A: Catalytically inactive mutant that causes some centrosome amplification above background levels when overexpressed.	16244668	1
O00444/E830D	O00444	PLK4	PLK4_HUMAN	E830D	-	-	-	neutral	NYPTReASFNR												VARIANT	E -> D (in dbSNP:rs17012739)	1.14899e+23	3
O00444/I670P	O00444	PLK4	PLK4_HUMAN	I670P	-	-	-	-	SPTDNiRYSFD												MUTAGEN	I->P: Decreases substantially the interaction with TENT5C. Does not affect localization to the centrosome. Loss of TENT5C recruitment to the centrosome.	32433990	1
O00444/K41M	O00444	PLK4	PLK4_HUMAN	K41M	96	β3;Catalytic-Lys	-	loss	LEVAIkIDKKA	0	0.998	0.002	0.996	0.996	0.008	0.728	0.994	0.994	0.012	0.53	MUTAGEN	K->M: Abolishes ability to phosphorylate CDC25C and CHEK2.	1.82395e+15	2
O00444/N449D	O00444	PLK4	PLK4_HUMAN	N449D	-	-	-	-	FERPDnQALSN												VARIANT	N -> D (in dbSNP:rs34906574)	17344846	1
O00444/N669R	O00444	PLK4	PLK4_HUMAN	N669R	-	-	-	-	PSPTDnSRYSF												MUTAGEN	N->R: Does not affect the interaction with TENT5C.	32433990	1
O00444/P317L	O00444	PLK4	PLK4_HUMAN	P317L	-	-	-	-	LLIGQpPNKMT												VARIANT	P -> L (in dbSNP:rs35049837)	17344846	1
O00444/R146H	O00444	PLK4	PLK4_HUMAN	R146H	439	Catalytic-loop	-	-	NLLLTrMNIKI	0.887	0.028	0.085	0.139	0.129	0.433	0.191	0.109	0.084	0.679	0.08	VARIANT	R -> H (in dbSNP:rs35232579)	17344846	1
O00444/S232T	O00444	PLK4	PLK4_HUMAN	S232T	701	αG/αH-loop	-	neutral	DYEMPsLSIEA	0.941	0.025	0.033	0.099	0.095	0.324	0.125	0.152	0.085	0.658	0.07	VARIANT	S -> T (in dbSNP:rs3811740)	1.14899e+23	3
O00444/T170D	O00444	PLK4	PLK4_HUMAN	T170D	529	A-loop	p	activating	HEKHYtCGTPN	0.012	0.119	0.869	0.998	0.993	0.803	0.987	0.312	0.978	0.746	0.589	MUTAGEN	T->D: Activating mutant.	1.82395e+15	2
O00444/W519S	O00444	PLK4	PLK4_HUMAN	W519S	-	-	-	neutral	TSKNAwDTKVK												VARIANT	W -> S (in dbSNP:rs56043017)	17344846	1
O00444/Y86C	O00444	PLK4	PLK4_HUMAN	Y86C	228	β5	-	-	DSNYVyVLEMC	0.176	0.399	0.425	0.67	0.656	0.515	0.606	0.509	0.623	0.598	0.518	VARIANT	Y -> C (in dbSNP:rs34156294)	17344846	1
O00506/D158A	O00506	STK25	STK25_HUMAN	D158A	479	A-loop;DFG-motif	-	loss	DVKLAdGVAGQ	0.004	0.985	0.011	0.972	0.973	0.058	0.595	0.959	0.951	0.026	0.634	MUTAGEN	D->A: Loss of kinase activity.	15037601	1
O00506/K49R	O00506	STK25	STK25_HUMAN	K49R	96	β3;Catalytic-Lys	-	loss	EVVAIkIDLEE	0	0.979	0.021	0.994	0.989	0.017	0.573	0.991	0.994	0.02	0.481	MUTAGEN	K->R: Loss of kinase activity and autophosphorylation.	15037601	1
O00506/Q64H	O00506	STK25	STK25_HUMAN	Q64H	147	αC	-	-	EIEDIqEITVL	0.339	0.262	0.4	0.517	0.544	0.477	0.453	0.418	0.448	0.57	0.431	VARIANT	Q -> H (in dbSNP:rs34341643)		0
O14578/D230V	O14578	CIT	CTRO_HUMAN	D230V	435	Catalytic-loop	-	decrease	ENILVdTGHIK	0.181	0.463	0.357	0.662	0.616	0.483	0.54	0.518	0.658	0.535	0.537	VARIANT	D -> V (in MCPH17; impairs kinase activity; exhibits abnormal mitotic cytokinesis; exhibits multipolar spindles; increases the neurons apoptotic process; dbSNP:rs886037894)	27453578	1
O14578/G106V	O14578	CIT	CTRO_HUMAN	G106V	40	β1;Gly-rich-loop	-	decrease	SLVGCgFAEVQ	0.097	0.765	0.138	0.799	0.837	0.313	0.627	0.756	0.842	0.34	0.621	VARIANT	G -> V (in MCPH17; impairs kinase activity; exhibits abnormal mitotic cytokinesis; exhibits multipolar spindles; increases the neurons apoptotic process; dbSNP:rs886037892)	27453578	1
O14578/G7E	O14578	CIT	CTRO_HUMAN	G7E	-	-	-	neutral	LKFKYgRNPLD												VARIANT	G -> E (in dbSNP:rs36054900)	17344846	1
O14578/K126Q	O14578	CIT	CTRO_HUMAN	K126Q	96	β3;Catalytic-Lys	-	decrease	DIYAMkMKKKA	0.011	0.961	0.028	0.99	0.982	0.038	0.6	0.963	0.974	0.035	0.445	VARIANT	K -> Q (in MCPH17; impairs kinase activity; exhibits abnormal mitotic cytokinesis; exhibits multipolar spindles; increases the neurons apoptotic process; dbSNP:rs886037893)	27453578	1
O14578/L183F	O14578	CIT	CTRO_HUMAN	L183F	250	αD	-	-	PGGDLlLLNRY	0.735	0.101	0.164	0.272	0.182	0.448	0.23	0.225	0.17	0.596	0.26	VARIANT	L -> F	17344846	1
O14578/R9Q	O14578	CIT	CTRO_HUMAN	R9Q	-	-	-	neutral	FKYGArPLDAG												VARIANT	R -> Q (in dbSNP:rs56193743)	17344846	1
O14730/K290A	O14730	RIOK3	RIOK3_HUMAN	K290A	-	-	ub	loss	TECAIkFKTTL												MUTAGEN	K->A: Decreases autophosphorylation (in vitro); abolishes inhibition of TNF-alpha-induced NF-kappaB activation; no effect on interaction with IRF3; fails to activate IFN-beta promoter and IRF3 phosphorylation.	1.95575e+15	2
O14730/L336V	O14730	RIOK3	RIOK3_HUMAN	L336V	-	-	-	-	KEMHNlRMQRA												VARIANT	L -> V (in dbSNP:rs35401850)	17344846	1
O14730/R441Q	O14730	RIOK3	RIOK3_HUMAN	R441Q	-	-	-	-	LEFLFrCRNVS												VARIANT	R -> Q (in dbSNP:rs33969048)	17344846	1
O14730/S447L	O14730	RIOK3	RIOK3_HUMAN	S447L	-	-	-	neutral	DCRNVsFFQKG												VARIANT	S -> L (in dbSNP:rs56282762)	17344846	1
O14733/A195T	O14733	MAP2K7	MP2K7_HUMAN	A195T	232	β5	-	-	TDVFIaELMGT	0.438	0.217	0.345	0.298	0.332	0.501	0.367	0.263	0.337	0.628	0.255	VARIANT	A -> T (in dbSNP:rs55800262)	17344846	1
O14733/L259F	O14733	MAP2K7	MP2K7_HUMAN	L259F	477	Catalytic-loop	-	-	RGQIKlDFGIS	0.202	0.507	0.291	0.71	0.695	0.412	0.604	0.518	0.624	0.485	0.574	VARIANT	L -> F (in dbSNP:rs1053566)	9535930	1
O14733/N118S	O14733	MAP2K7	MP2K7_HUMAN	N118S	27	N-term-β1	-	-	YQAEInLENLG	0.569	0.225	0.206	0.389	0.292	0.49	0.36	0.283	0.358	0.678	0.256	VARIANT	N -> S (in dbSNP:rs56316660)	17344846	1
O14733/R138C	O14733	MAP2K7	MP2K7_HUMAN	R138C	53	β2	-	-	QVWKMrRKTGH	0.364	0.197	0.44	0.499	0.433	0.534	0.493	0.274	0.353	0.71	0.301	VARIANT	R -> C (in dbSNP:rs56106612)	17344846	1
O14733/R162C	O14733	MAP2K7	MP2K7_HUMAN	R162C	145	αC	-	-	KEENKrLMDLD	0.265	0.271	0.464	0.585	0.498	0.535	0.532	0.367	0.49	0.642	0.357	VARIANT	R -> C (in a colorectal adenocarcinoma sample; somatic mutation)	17344846	1
O14733/R162H	O14733	MAP2K7	MP2K7_HUMAN	R162H	145	αC	-	-	KEENKrLMDLD	0.299	0.274	0.426	0.554	0.48	0.541	0.484	0.349	0.393	0.616	0.331	VARIANT	R -> H (in a colorectal adenocarcinoma sample; somatic mutation)	17344846	1
O14757/D130A	O14757	CHEK1	CHK1_HUMAN	D130A	426	Catalytic-loop;HrD-motif	-	loss	GITHRdKPENL	0.008	0.958	0.034	0.957	0.972	0.128	0.672	0.9	0.972	0.068	0.571	MUTAGEN	D->A: Abolishes kinase activity.	1.06735e+62	8
O14757/E223V	O14757	CHEK1	CHK1_HUMAN	E223V	661	αG/αH-loop	-	-	YSDWKeKTYLN	0.374	0.226	0.4	0.402	0.394	0.601	0.417	0.268	0.365	0.702	0.322	VARIANT	E -> V (in dbSNP:rs35817404)	17344846	1
O14757/F344A	O14757	CHEK1	CHK1_HUMAN	F344A	-	-	-	increase	VQGISfQPTCP												MUTAGEN	F->A: Impairs nuclear export.	12676962	1
O14757/I471V	O14757	CHEK1	CHK1_HUMAN	I471V	-	-	-	neutral	VSSQKiLPAT												VARIANT	I -> V (in dbSNP:rs506504)	1.07172e+45	6
O14757/K132R	O14757	CHEK1	CHK1_HUMAN	K132R	428	Catalytic-loop	ub	decrease	THRDIkENLLL	0.083	0.69	0.227	0.878	0.895	0.293	0.711	0.729	0.907	0.311	0.471	MUTAGEN	K->R: Strong reduction of chromatin-associated CHK1 ubiquitination.	32357935	1
O14757/K38R	O14757	CHEK1	CHK1_HUMAN	K38R	96	β3;Catalytic-Lys	-	loss	EAVAVkVDMKR	0.009	0.916	0.075	0.988	0.959	0.049	0.585	0.934	0.974	0.051	0.384	MUTAGEN	K->R: Abolishes kinase activity.	1.24468e+15	2
O14757/K436R	O14757	CHEK1	CHK1_HUMAN	K436R	-	-	ub	-	LEMDDkLVDFR												MUTAGEN	K->R: Enhances stability of the protein, probably by preventing ubiquitination at this site.	19716789	1
O14757/M353A	O14757	CHEK1	CHK1_HUMAN	M353A	-	-	-	increase	TCPDHmLNSQL												MUTAGEN	M->A: Impairs nuclear export.	12676962	1
O14757/R156Q	O14757	CHEK1	CHK1_HUMAN	R156Q	493	A-loop	-	-	LATVFrNNRER	0.264	0.244	0.492	0.613	0.526	0.619	0.656	0.313	0.394	0.705	0.424	VARIANT	R -> Q (in dbSNP:rs3731410)		0
O14757/R372E	O14757	CHEK1	CHK1_HUMAN	R372E	-	-	-	-	QNPWQrVKRMT												MUTAGEN	R->E: In 3RE mutant. Disrupts the folding and/or conformation, allowing increased accessibility to FBXO6 component of SCF-type E3 ubiquitin ligase complex; when associated with E-376 and E-379.	19716789	1
O14757/R376E	O14757	CHEK1	CHK1_HUMAN	R376E	-	-	-	-	QRLVKrTRFFT												MUTAGEN	R->E: In 3RE mutant. Disrupts the folding and/or conformation, allowing increased accessibility to FBXO6 component of SCF-type E3 ubiquitin ligase complex; when associated with E-372 and E-379.	19716789	1
O14757/R379E	O14757	CHEK1	CHK1_HUMAN	R379E	-	-	-	-	VKRMTrFTKLD												MUTAGEN	R->E: In 3RE mutant. Disrupts the folding and/or conformation, allowing increased accessibility to FBXO6 component of SCF-type E3 ubiquitin ligase complex; when associated with E-372 and E-376.	19716789	1
O14757/S317A	O14757	CHEK1	CHK1_HUMAN	S317A	-	-	p	decrease	VKYSSsPEPRT												MUTAGEN	S->A: Abrogates interaction with RAD51; when associated with A-345. Reduces phosphorylation and impairs activation by hydroxyurea and ionizing radiation. Abrogates nuclear retention upon checkpoint activation. Impairs interaction with FBXO6.	1.13906e+39	5
O14757/S317E	O14757	CHEK1	CHK1_HUMAN	S317E	-	-	p	increase	VKYSSsPEPRT												MUTAGEN	S->E: Enhances interaction with RAD51; when associated with E-345.	1.13906e+39	5
O14757/S345A	O14757	CHEK1	CHK1_HUMAN	S345A	-	-	p	decrease	QGISFsPTCPD												MUTAGEN	S->A: Abrogates interaction with RAD51; when associated with A-317. Reduces phosphorylation and impairs activation by hydroxyurea and ionizing radiation. Impairs interaction with YWHAZ which is required for nuclear retention after checkpoint activation.	1.13906e+47	6
O14757/S345E	O14757	CHEK1	CHK1_HUMAN	S345E	-	-	p	increase	QGISFsPTCPD												MUTAGEN	S->E: Enhances interaction with RAD51; when associated with E-317.	1.13906e+47	6
O14757/S357A	O14757	CHEK1	CHK1_HUMAN	S357A	-	-	-	-	HMLLNsLLGTP												MUTAGEN	S->A: No effect on phosphorylation induced by hydroxyurea.	11390642	1
O14757/S366A	O14757	CHEK1	CHK1_HUMAN	S366A	-	-	-	-	GTPGSsNPWQR												MUTAGEN	S->A: No effect on phosphorylation induced by hydroxyurea.	11390642	1
O14757/S468A	O14757	CHEK1	CHK1_HUMAN	S468A	-	-	p	-	IDIVSsKIWLP												MUTAGEN	S->A: No effect on phosphorylation induced by hydroxyurea.	11390642	1
O14757/V312M	O14757	CHEK1	CHK1_HUMAN	V312M	-	-	-	-	SSEENvYSSSQ												VARIANT	V -> M (in dbSNP:rs34097480)	17344846	1
O14874/L389P	O14874	BCKDK	BCKD_HUMAN	L389P	-	-	-	loss	LQLQSlGIGTD												VARIANT	L -> P (in BCKDKD; complete loss of kinase activity)	24449431	1
O14874/R174G	O14874	BCKDK	BCKD_HUMAN	R174G	-	-	-	decrease	LAEGLrSRKHI												VARIANT	R -> G (in BCKDKD; partial loss of kinase activity)	24449431	1
O14874/R224P	O14874	BCKDK	BCKD_HUMAN	R224P	-	-	-	-	GIICTrSPKKI												VARIANT	R -> P (in BCKDKD; dbSNP:rs147210405)	22956686	1
O14920/A360S	O14920	IKBKB	IKKB_HUMAN	A360S	-	-	-	-	QEAGLaIPDKP												VARIANT	A -> S (in breast cancer samples; infiltrating ductal carcinoma; somatic mutation)	1.696e+15	2
O14920/A710T	O14920	IKBKB	IKKB_HUMAN	A710T	-	-	-	-	SEELVaAHNLC												VARIANT	A -> T (in dbSNP:rs34309584)	17344846	1
O14920/A736T	O14920	IKBKB	IKKB_HUMAN	A736T	-	-	-	-	DQSFTaDWSWL												VARIANT	A -> T (in dbSNP:rs17611716)		0
O14920/D166A	O14920	IKBKB	IKKB_HUMAN	D166A	479	A-loop;DFG-motif	-	loss	IHKIIdGYAKE	0.007	0.979	0.014	0.969	0.973	0.047	0.617	0.955	0.956	0.042	0.639	MUTAGEN	D->A: Loss of protein kinase activity.	25326418	1
O14920/F734L	O14920	IKBKB	IKKB_HUMAN	F734L	-	-	-	-	EQDQSfALDWS												VARIANT	F -> L (in dbSNP:rs56301637)	17344846	1
O14920/K163R	O14920	IKBKB	IKKB_HUMAN	K163R	476	Catalytic-loop	ub	-	QRLIHkIDLGY	0.195	0.448	0.357	0.666	0.704	0.464	0.655	0.518	0.635	0.493	0.43	MUTAGEN	K->R: Monoubiquitinated; when associated with E-177 and E-181.	19675099	1
O14920/K171E	O14920	IKBKB	IKKB_HUMAN	K171E	485	A-loop	ub	increase	DLGYAkLDQGS	0.059	0.239	0.701	0.831	0.867	0.71	0.873	0.398	0.863	0.661	0.521	MUTAGEN	K->E: Increased activation of NF-kappa-B signaling.	30337470	1
O14920/K44A	O14920	IKBKB	IKKB_HUMAN	K44A	96	β3;Catalytic-Lys	-	loss	EQIAIkCRQEL	0.003	0.996	0.002	0.996	0.984	0.01	0.661	0.991	0.995	0.012	0.514	MUTAGEN	K->A: Loss of kinase activity and no effect on binding to NIK.	93464849346485	2
O14920/P191A	O14920	IKBKB	IKKB_HUMAN	P191A	543	A-loop;APE-motif	-	-	LQYLApLLEQQ	0.2	0.536	0.263	0.655	0.697	0.377	0.566	0.565	0.644	0.394	0.451	MUTAGEN	P->A: Loss of hypoxic inducibility.	17114296	1
O14920/Q369R	O14920	IKBKB	IKKB_HUMAN	Q369R	-	-	-	-	DKPATqISDGK												VARIANT	Q -> R (in dbSNP:rs56411242)	17344846	1
O14920/R526Q	O14920	IKBKB	IKKB_HUMAN	R526Q	-	-	-	-	VELCGrNEVKL												VARIANT	R -> Q (in dbSNP:rs2272736)	17344846	1
O14920/R554W	O14920	IKBKB	IKKB_HUMAN	R554W	-	-	-	-	RSPMGrQGGTL												VARIANT	R -> W (in dbSNP:rs17875749)		0
O14920/S177A	O14920	IKBKB	IKKB_HUMAN	S177A	504	A-loop	p	decrease	ELDQGsCTSFV	0.099	0.686	0.215	0.838	0.841	0.434	0.777	0.621	0.795	0.422	0.424	MUTAGEN	S->A: Decrease of activity.	196750999346484	2
O14920/S177E	O14920	IKBKB	IKKB_HUMAN	S177E	504	A-loop	p	activating	ELDQGsCTSFV	0.052	0.163	0.784	0.883	0.869	0.787	0.892	0.357	0.823	0.684	0.505	MUTAGEN	S->E: Full activation. Interaction with TRIM21 is enhanced; when associated with E-181. Monoubiquitinated; when associated with R-163 and E-181. Strongly promoted NF-kappa-B gene expression; when associated with E-181.	196750999346484	2
O14920/S181A	O14920	IKBKB	IKKB_HUMAN	S181A	529	A-loop	p	decrease	GSLCTsVGTLQ	0.019	0.877	0.104	0.982	0.993	0.312	0.879	0.777	0.962	0.281	0.483	MUTAGEN	S->A: Decrease of activity.	196750999346484	2
O14920/S181E	O14920	IKBKB	IKKB_HUMAN	S181E	529	A-loop	p	activating	GSLCTsVGTLQ	0.006	0.19	0.804	0.993	0.997	0.756	0.983	0.314	0.958	0.715	0.543	MUTAGEN	S->E: Full activation. Interaction with TRIM21 is enhanced; when associated with E-177. Monoubiquitinated; when associated with R-163 and E-177. Strongly promoted NF-kappa-B gene expression; when associated with E-177.	196750999346484	2
O14920/V203I	O14920	IKBKB	IKKB_HUMAN	V203I	585	αF	-	increase	KYTVTvYWSFG	0.358	0.194	0.448	0.397	0.36	0.534	0.424	0.177	0.262	0.706	0.33	VARIANT	V -> I (in IMD15A; gain-of-function mutation resulting in increased activation of NF-kappa-B signaling pathway; dbSNP:rs1563340753)	30337470	1
O14936/D710G	O14936	CASK	CSKP_HUMAN	D710G	-	-	-	-	KKQYKdYLAKH												VARIANT	D -> G (in MICPCH; dbSNP:rs137852818)	19377476	1
O14936/G96V	O14936	CASK	CSKP_HUMAN	G96V	239	β5/αD-loop	-	-	FEFMDgDLCFE	0.325	0.312	0.363	0.468	0.458	0.482	0.484	0.347	0.415	0.576	0.553	VARIANT	G -> V (in a lung large cell carcinoma sample; somatic mutation)	17344846	1
O14936/P396S	O14936	CASK	CSKP_HUMAN	P396S	-	-	-	-	NTKSSpIRNPP												VARIANT	P -> S (in MICPCH; dbSNP:rs137852820)	19377476	1
O14936/R28L	O14936	CASK	CSKP_HUMAN	R28L	48	β2	-	-	FSVVRrINRET	0.257	0.183	0.56	0.573	0.532	0.6	0.598	0.306	0.421	0.676	0.343	VARIANT	R -> L (in FGS4; does not reveal significant alterations induced by the mutation substitution; causes a partial skipping of exon 2 of the protein; dbSNP:rs137852816)	19200522	1
O14936/Y268H	O14936	CASK	CSKP_HUMAN	Y268H	843	αI	-	-	ERITVyALNHP	0.641	0.114	0.245	0.304	0.25	0.462	0.286	0.226	0.234	0.675	0.189	VARIANT	Y -> H (in MICPCH; dbSNP:rs137852817)	19377476	1
O14965/C290A	O14965	AURKA	AURKA_HUMAN	C290A	534	A-loop	-	-	RRTTLcTLDYL	0.185	0.427	0.388	0.73	0.712	0.44	0.636	0.577	0.737	0.489	0.57	MUTAGEN	C->A: Enhances stability; when associated with A-393.	27837025	1
O14965/C393A	O14965	AURKA	AURKA_HUMAN	C393A	862	C-term-αI	-	-	SKPSNcNKESA	0.658	0.172	0.169	0.293	0.307	0.427	0.323	0.345	0.322	0.562	0.191	MUTAGEN	C->A: Enhances stability; when associated with A-290.	27837025	1
O14965/D274N	O14965	AURKA	AURKA_HUMAN	D274N	479	A-loop;DFG-motif	-	loss	ELKIAdGWSVH	0.049	0.871	0.081	0.899	0.893	0.137	0.569	0.875	0.874	0.127	0.518	MUTAGEN	D->N: Abolishes cilia disassembly and kinase activity.	1.45803e+15	2
O14965/F165A	O14965	AURKA	AURKA_HUMAN	F165A	102	β3/αC-loop	-	-	ALKVLfAQLEK	0.252	0.409	0.34	0.595	0.567	0.449	0.488	0.474	0.602	0.498	0.478	MUTAGEN	F->A: Decreases the interaction with phosphatase type 1 isoforms.	11551964	1
O14965/F31I	O14965	AURKA	AURKA_HUMAN	F31I	-	-	-	neutral	LVTQQfCQNPL												VARIANT	F -> I (in dbSNP:rs2273535)	1.58673e+38	5
O14965/F346A	O14965	AURKA	AURKA_HUMAN	F346A	693	αG/αH-loop	-	-	ISRVEfFPDFV	0.297	0.325	0.377	0.54	0.487	0.504	0.488	0.407	0.436	0.613	0.418	MUTAGEN	F->A: Decreases the interaction with phosphatase type 1 isoforms.	11551964	1
O14965/G11R	O14965	AURKA	AURKA_HUMAN	G11R	-	-	-	-	ENCISgVKATA												VARIANT	G -> R (in dbSNP:rs6069717)		0
O14965/G198N	O14965	AURKA	AURKA_HUMAN	G198N	184	β4	-	decrease	ILRLYgFHDAT	0.546	0.213	0.241	0.446	0.404	0.4	0.315	0.332	0.347	0.544	0.279	MUTAGEN	G->N: Reduces interaction with TPX2. Reduces kinase activity tenfold. Promotes interaction with the AURKB binding partners INCENP and BIRC5 that are normally not bound by AURKA.	19357306	1
O14965/I57V	O14965	AURKA	AURKA_HUMAN	I57V	-	-	-	increase,neutral	NSSQRiLQAQK												VARIANT	I -> V (increased kinase activity; dbSNP:rs1047972)	1.54893e+52	7
O14965/K162R	O14965	AURKA	AURKA_HUMAN	K162R	96	β3;Catalytic-Lys	-	loss	FILALkLFKAQ	0.009	0.928	0.063	0.984	0.949	0.052	0.574	0.947	0.975	0.043	0.412	MUTAGEN	K->R: Loss of kinase activity.	14702041	1
O14965/M373V	O14965	AURKA	AURKA_HUMAN	M373V	834	αI	-	neutral	PSQRPmREVLE	0.834	0.073	0.094	0.18	0.175	0.362	0.212	0.195	0.153	0.643	0.118	VARIANT	M -> V (in dbSNP:rs33923703)	17344846	1
O14965/P50L	O14965	AURKA	AURKA_HUMAN	P50L	-	-	-	neutral	QRVLCpNSSQR												VARIANT	P -> L (in dbSNP:rs34572020)	17344846	1
O14965/Q335A	O14965	AURKA	AURKA_HUMAN	Q335A	639	αG	-	decrease	EANTYqTYKRI	0.499	0.324	0.177	0.294	0.356	0.417	0.293	0.401	0.351	0.516	0.194	MUTAGEN	Q->A: Reduces binding to MYCN.	27837025	1
O14965/R205A	O14965	AURKA	AURKA_HUMAN	R205A	219	β4/β5-loop	-	-	FHDATrYLILE	0.24	0.344	0.416	0.614	0.574	0.56	0.568	0.424	0.546	0.565	0.42	MUTAGEN	R->A: Reduces ubiquitination and proteasomal degradation.	10851084	1
O14965/S104L	O14965	AURKA	AURKA_HUMAN	S104L	2	N-term-β1	-	-	KQPLPsPENNP	0.656	0.144	0.2	0.421	0.418	0.482	0.375	0.327	0.376	0.454	0.377	VARIANT	S -> L (in dbSNP:rs2230743)		0
O14965/S155R	O14965	AURKA	AURKA_HUMAN	S155R	79	β2/β3-loop	-	decrease	AREKQsFILAL	0.306	0.303	0.39	0.483	0.41	0.483	0.507	0.392	0.401	0.586	0.351	VARIANT	S -> R (in a colorectal adenocarcinoma sample; somatic mutation; reduces interaction with TPX2)	1.73448e+15	2
O14965/T287A	O14965	AURKA	AURKA_HUMAN	T287A	528	A-loop	p	-	PSSRRtLCGTL	0.133	0.555	0.312	0.814	0.809	0.368	0.698	0.598	0.798	0.364	0.292	MUTAGEN	T->A: No direct effect on catalytic activity.	19668197	1
O14965/T287E	O14965	AURKA	AURKA_HUMAN	T287E	528	A-loop	p	activating	PSSRRtLCGTL	0.094	0.215	0.692	0.812	0.786	0.713	0.751	0.316	0.707	0.742	0.347	MUTAGEN	T->E: Enhances interaction with TPX2.	19668197	1
O14965/T288A	O14965	AURKA	AURKA_HUMAN	T288A	529	A-loop	p	decrease	SSRRTtCGTLD	0.019	0.921	0.061	0.994	0.985	0.286	0.883	0.806	0.972	0.235	0.471	MUTAGEN	T->A: Reduces cilia disassembly and kinase activity.	17604723	1
O14965/T288D	O14965	AURKA	AURKA_HUMAN	T288D	529	A-loop	p	increase	SSRRTtCGTLD	0.025	0.128	0.847	0.986	0.985	0.797	0.983	0.324	0.978	0.768	0.506	MUTAGEN	T->D: Mimics phosphorylation state and increases kinase activity.	11039908	1
O14965/V174M	O14965	AURKA	AURKA_HUMAN	V174M	122	αC	-	activating	LEKAGvHQLRR	0.454	0.151	0.395	0.279	0.225	0.549	0.357	0.192	0.2	0.742	0.251	VARIANT	V -> M (in a metastatic melanoma sample; somatic mutation; constitutively enhanced kinase activity)	1.73448e+15	2
O14965/Y334A	O14965	AURKA	AURKA_HUMAN	Y334A	638	αG	-	decrease	FEANTyETYKR	0.326	0.412	0.262	0.56	0.513	0.446	0.458	0.442	0.548	0.554	0.358	MUTAGEN	Y->A: Reduces binding to MYCN.	27837025	1
O14976/D1297N	O14976	GAK	GAK_HUMAN	D1297N	-	-	-	neutral	FMELNdWSEFE												VARIANT	D -> N (in dbSNP:rs1134921)	17344846	1
O14976/D787Y	O14976	GAK	GAK_HUMAN	D787Y	-	-	-	neutral	PSSSAdSRFLH												VARIANT	D -> Y (in dbSNP:rs34585705)	17344846	1
O14976/G962D	O14976	GAK	GAK_HUMAN	G962D	-	-	-	-	AADPFgLLPSS												VARIANT	G -> D (in a lung neuroendocrine carcinoma sample; somatic mutation; dbSNP:rs773153935)	17344846	1
O14976/K1265R	O14976	GAK	GAK_HUMAN	K1265R	-	-	-	neutral	PEQVKkYRRAV												VARIANT	K -> R (in dbSNP:rs2306242)	17344846	1
O14976/P1137L	O14976	GAK	GAK_HUMAN	P1137L	-	-	-	-	PPQAKpPKACT												VARIANT	P -> L (in dbSNP:rs56169884)	17344846	1
O14976/Q1120H	O14976	GAK	GAK_HUMAN	Q1120H	-	-	-	-	GSSSWqSRPPA												VARIANT	Q -> H (in dbSNP:rs55801437)	17344846	1
O14976/Q877R	O14976	GAK	GAK_HUMAN	Q877R	-	-	-	neutral	PEPVPqDGVDL												VARIANT	Q -> R (in dbSNP:rs149842313)	17344846	1
O14976/S1168N	O14976	GAK	GAK_HUMAN	S1168N	-	-	p	-	GVRAPsAQKPK												VARIANT	S -> N (in dbSNP:rs56326341)	17344846	1
O14976/S144L	O14976	GAK	GAK_HUMAN	S144L	365	αD/αE-loop	-	-	SRGPLsDTVLK	0.355	0.296	0.349	0.498	0.458	0.462	0.476	0.435	0.412	0.557	0.459	VARIANT	S -> L (in dbSNP:rs768962219)	17344846	1
O14976/T1051M	O14976	GAK	GAK_HUMAN	T1051M	-	-	-	-	SAVAPtATEGP												VARIANT	T -> M (in dbSNP:rs35227944)	17344846	1
O14976/V580M	O14976	GAK	GAK_HUMAN	V580M	-	-	-	-	ILVRAvMTPVP												VARIANT	V -> M (in dbSNP:rs34255232)	17344846	1
O15075/G29C	O15075	DCLK1	DCLK1_HUMAN	G29C	-	-	-	-	GSRVNgPSPTH												VARIANT	G -> C (in a gastric adenocarcinoma sample; somatic mutation)	17344846	1
O15075/R292H	O15075	DCLK1	DCLK1_HUMAN	R292H	-	-	-	-	IASSSrSTTKS												VARIANT	R -> H (in dbSNP:rs56185003)	17344846	1
O15075/R93Q	O15075	DCLK1	DCLK1_HUMAN	R93Q	-	-	-	-	LADLTrLSDNV												VARIANT	R -> Q (in a gastric adenocarcinoma sample; somatic mutation; dbSNP:rs1366698690)	17344846	1
O15075/S291F	O15075	DCLK1	DCLK1_HUMAN	S291F	-	-	-	-	KIASSsRSTTK												VARIANT	S -> F (in a gastric adenocarcinoma sample; somatic mutation)	17344846	1
O15075/T46M	O15075	DCLK1	DCLK1_HUMAN	T46M	-	-	p	-	FYRTRtQTLSS												VARIANT	T -> M (in a gastric adenocarcinoma sample; somatic mutation)	17344846	1
O15111/K44A	O15111	CHUK	IKKA_HUMAN	K44A	96	β3;Catalytic-Lys	ub	loss	LKIAIkCRLEL	0.003	0.993	0.004	0.996	0.982	0.011	0.728	0.991	0.995	0.017	0.514	MUTAGEN	K->A: Loss of kinase activity.	92443109346484	2
O15111/K44M	O15111	CHUK	IKKA_HUMAN	K44M	96	β3;Catalytic-Lys	ub	loss	LKIAIkCRLEL	0	0.992	0.008	0.996	0.988	0.011	0.755	0.986	0.994	0.018	0.538	MUTAGEN	K->M: Loss of autophosphorylation.	92443109346484	2
O15111/S126C	O15111	CHUK	IKKA_HUMAN	S126C	379	αE	-	-	ILSLLsIGSGI	0.39	0.229	0.382	0.445	0.418	0.54	0.462	0.35	0.343	0.647	0.332	VARIANT	S -> C (in dbSNP:rs34427437)	17344846	1
O15111/S176A	O15111	CHUK	IKKA_HUMAN	S176A	504	A-loop	p	loss	DVDQGsCTSFV	0.117	0.663	0.22	0.803	0.82	0.405	0.744	0.631	0.795	0.433	0.398	MUTAGEN	S->A: Loss of phosphorylation and of activity.	93464849520446	2
O15111/S176E	O15111	CHUK	IKKA_HUMAN	S176E	504	A-loop	p	activating	DVDQGsCTSFV	0.058	0.17	0.772	0.868	0.842	0.761	0.875	0.344	0.817	0.71	0.448	MUTAGEN	S->E: Full activation.	93464849520446	2
O15111/S180A	O15111	CHUK	IKKA_HUMAN	S180A	529	A-loop	p	-	GSLCTsVGTLQ	0.043	0.841	0.116	0.972	0.962	0.295	0.86	0.783	0.949	0.263	0.456	MUTAGEN	S->A: No change in phosphorylation.	9520446	1
O15111/T179A	O15111	CHUK	IKKA_HUMAN	T179A	528	A-loop	ac	-	QGSLCtFVGTL	0.19	0.55	0.26	0.759	0.815	0.351	0.645	0.622	0.798	0.314	0.312	MUTAGEN	T->A: No change in phosphorylation.	9520446	1
O15111/T23A	O15111	CHUK	IKKA_HUMAN	T23A	39	β1;Gly-rich-loop	p	decrease	RERLGtGFGNV	0.191	0.575	0.235	0.715	0.712	0.337	0.553	0.557	0.694	0.392	0.316	MUTAGEN	T->A: Loss of phosphorylation and decrease of kinase activity.	10485710	1
O15111/V155A	O15111	CHUK	IKKA_HUMAN	V155A	463	Catalytic-loop	-	neutral	IVLQDvGKIIH	0.811	0.071	0.118	0.141	0.181	0.458	0.211	0.187	0.161	0.606	0.146	VARIANT	V -> A (in dbSNP:rs2230803)	17344846	1
O15111/V268I	O15111	CHUK	IKKA_HUMAN	V268I	801	αG/αH-loop	-	neutral	SLCSLvEPMEN	0.891	0.028	0.081	0.111	0.1	0.334	0.149	0.113	0.085	0.672	0.147	VARIANT	V -> I (in dbSNP:rs2230804)	1.51641e+43	6
O15146/A27G	O15146	MUSK	MUSK_HUMAN	A27G	-	-	-	-	EKLPKaVITTP												VARIANT	A -> G (in dbSNP:rs56054734)	17344846	1
O15146/A727V	O15146	MUSK	MUSK_HUMAN	A727V	428	Catalytic-loop	-	decrease	VHRDLaRNCLV	0.098	0.74	0.162	0.842	0.874	0.268	0.566	0.764	0.837	0.288	0.558	VARIANT	A -> V (in CMS9; affects interaction with DOK7 and impairs MUSK phosphorylation; altered AChR clustering; dbSNP:rs397515450)	20371544	1
O15146/D38E	O15146	MUSK	MUSK_HUMAN	D38E	-	-	-	-	PLETVdLVEEV												VARIANT	D -> E (in CMS9; dbSNP:rs775587809)	24183479	1
O15146/D743N	O15146	MUSK	MUSK_HUMAN	D743N	479	A-loop;DFG-motif	-	loss	VVKIAdGLSRN	0.063	0.824	0.113	0.924	0.899	0.182	0.588	0.823	0.869	0.176	0.575	MUTAGEN	D->N: Severe loss of kinase activity.	25029443	1
O15146/E782D	O15146	MUSK	MUSK_HUMAN	E782D	584	αF	-	-	NRYTTeDVWAY	0.757	0.103	0.14	0.211	0.228	0.441	0.243	0.17	0.147	0.603	0.153	VARIANT	E -> D (in dbSNP:rs34614566)	17344846	1
O15146/G107E	O15146	MUSK	MUSK_HUMAN	G107E	-	-	-	-	NNGVGgVESCG												VARIANT	G -> E (in dbSNP:rs55786136)	17344846	1
O15146/G584C	O15146	MUSK	MUSK_HUMAN	G584C	40	β1;Gly-rich-loop	-	decrease	RDIGEgFGRVF	0.069	0.771	0.16	0.832	0.873	0.27	0.633	0.753	0.865	0.299	0.605	MUTAGEN	G->C,D: Mild decrease in kinase activity.	25029443	1
O15146/G584D	O15146	MUSK	MUSK_HUMAN	G584D	40	β1;Gly-rich-loop	-	decrease	RDIGEgFGRVF	0.083	0.81	0.107	0.854	0.875	0.246	0.678	0.763	0.898	0.284	0.649	MUTAGEN	G->C,D: Mild decrease in kinase activity.	25029443	1
O15146/I575T	O15146	MUSK	MUSK_HUMAN	I575T	30	N-term-β1	-	decrease	YPRNNiYVRDI	0.437	0.263	0.3	0.454	0.399	0.479	0.378	0.346	0.365	0.645	0.344	VARIANT	I -> T (in FADS1; reduces agrin-dependent AChR aggregation and tyrosine kinase activity in developing neuromuscular junction; dbSNP:rs751889864)	25537362	1
O15146/K609R	O15146	MUSK	MUSK_HUMAN	K609R	96	β3;Catalytic-Lys	-	loss	TMVAVkLKEEA	0	0.982	0.018	0.996	0.98	0.02	0.646	0.983	0.994	0.025	0.463	MUTAGEN	K->R: Severe loss of kinase activity.	25029443	1
O15146/L629F	O15146	MUSK	MUSK_HUMAN	L629F	152	αC	-	-	QREAAlAEFDN	0.729	0.077	0.193	0.349	0.247	0.509	0.333	0.186	0.151	0.68	0.296	VARIANT	L -> F (in dbSNP:rs34267283)	17344846	1
O15146/M413I	O15146	MUSK	MUSK_HUMAN	M413I	-	-	-	neutral	KEWLVmEKTHR												VARIANT	M -> I (in dbSNP:rs2274419)	17344846	1
O15146/M605I	O15146	MUSK	MUSK_HUMAN	M605I	91	β3	-	decrease	YEPFTmAVKML	0.317	0.347	0.336	0.481	0.487	0.496	0.432	0.404	0.412	0.523	0.371	VARIANT	M -> I (in CMS9; affects interaction with DOK7 and impairs MUSK phosphorylation; altered AChR clustering; dbSNP:rs766640370)	20371544	1
O15146/M835V	O15146	MUSK	MUSK_HUMAN	M835V	819	αH	-	-	ELYNLmLCWSK	0.328	0.354	0.318	0.518	0.421	0.491	0.512	0.372	0.412	0.545	0.434	VARIANT	M -> V (in CMS9; reduces AChR aggregation in developing neuromuscular junction)	23326516	1
O15146/N222S	O15146	MUSK	MUSK_HUMAN	N222S	-	-	-	-	APESHnTFGSF												VARIANT	N -> S (in dbSNP:rs55826142)	17344846	1
O15146/N664S	O15146	MUSK	MUSK_HUMAN	N664S	250	αD	-	-	AYGDLnFLRSM	0.674	0.125	0.201	0.323	0.321	0.48	0.258	0.247	0.24	0.634	0.301	VARIANT	N -> S (in dbSNP:rs55963442)	17344846	1
O15146/N819S	O15146	MUSK	MUSK_HUMAN	N819S	663	αG/αH-loop	-	-	YVRDGnLSCPE	0.813	0.074	0.113	0.167	0.164	0.41	0.159	0.174	0.164	0.644	0.113	VARIANT	N -> S (in a lung neuroendocrine carcinoma sample; somatic mutation; dbSNP:rs757577755)	17344846	1
O15146/P344R	O15146	MUSK	MUSK_HUMAN	P344R	-	-	-	-	TSYADpEAQEL												VARIANT	P -> R (in CMS9; dbSNP:rs387906803)	19949040	1
O15146/P696L	O15146	MUSK	MUSK_HUMAN	P696L	358	αD/αE-loop	-	-	SPGPPpSCAEQ	0.481	0.229	0.29	0.421	0.325	0.508	0.317	0.293	0.321	0.602	0.282	VARIANT	P -> L (in dbSNP:rs56126328)	17344846	1
O15146/R858H	O15146	MUSK	MUSK_HUMAN	R858H	852	αI	-	-	HRILErCERAE	0.718	0.107	0.175	0.217	0.206	0.462	0.265	0.216	0.15	0.67	0.124	VARIANT	R -> H (in dbSNP:rs34115159)	17344846	1
O15146/S159G	O15146	MUSK	MUSK_HUMAN	S159G	-	-	-	neutral	WIKGDsLRENS												VARIANT	S -> G (in dbSNP:rs35176182)	17344846	1
O15146/T100M	O15146	MUSK	MUSK_HUMAN	T100M	-	-	-	neutral	GIYCCtNNGVG												VARIANT	T -> M (in dbSNP:rs35142681)	17344846	1
O15146/V644A	O15146	MUSK	MUSK_HUMAN	V644A	185	β4	-	neutral	VKLLGvAVGKP	0.429	0.233	0.339	0.402	0.388	0.5	0.432	0.336	0.308	0.575	0.415	VARIANT	V -> A (in dbSNP:rs41279055)	17344846	1
O15146/V790M	O15146	MUSK	MUSK_HUMAN	V790M	593	αF	-	decrease	VWAYGvLWEIF	0.234	0.457	0.308	0.625	0.65	0.397	0.504	0.546	0.598	0.402	0.493	VARIANT	V -> M (in CMS9; does not affect catalytic kinase activity; reduces protein expression and stability; dbSNP:rs199476083)	15496425	1
O15146/V829L	O15146	MUSK	MUSK_HUMAN	V829L	806	αH	-	neutral	PENCPvLYNLM	0.89	0.029	0.081	0.094	0.107	0.413	0.189	0.117	0.087	0.726	0.116	VARIANT	V -> L (in dbSNP:rs578430)	17344846	1
O15164/C840W	O15164	TRIM24	TIF1A_HUMAN	C840W	-	-	-	-	GGELLcEKCPK												MUTAGEN	C->W: Abolishes interaction with histone H3.	21164480	1
O15164/D827A	O15164	TRIM24	TIF1A_HUMAN	D827A	-	-	-	-	DDPNEdCAVCQ												MUTAGEN	D->A: Strongly reduced affinity for histone H3 that is not methylated at 'Lys-4' (H3K4me0).	21164480	1
O15164/I320T	O15164	TRIM24	TIF1A_HUMAN	I320T	-	-	-	-	TLMVEiKKGKA												VARIANT	I -> T (in an ovarian serous carcinoma sample; somatic mutation)	17344846	1
O15164/N796S	O15164	TRIM24	TIF1A_HUMAN	N796S	-	-	-	neutral	GLHQDnSNGKS												VARIANT	N -> S (in dbSNP:rs35356723)		0
O15164/R1009S	O15164	TRIM24	TIF1A_HUMAN	R1009S	-	-	-	neutral	LYPEKrPKPEF												VARIANT	R -> S (in dbSNP:rs34585297)	17344846	1
O15164/S762N	O15164	TRIM24	TIF1A_HUMAN	S762N	-	-	-	-	RSILTsLLNSS												VARIANT	S -> N	17344846	1
O15164/S768A	O15164	TRIM24	TIF1A_HUMAN	S768A	-	-	p	-	LLLNSsSSTSE												MUTAGEN	S->A: Ubiquitination is significantly lower than wild-type.	24820418	1
O15164/T403N	O15164	TRIM24	TIF1A_HUMAN	T403N	-	-	-	-	PVTNNtQFHCD												VARIANT	T -> N (in a lung squamous cell carcinoma sample; somatic mutation)	17344846	1
O15197/A221V	O15197	EPHB6	EPHB6_HUMAN	A221V	-	-	-	-	TGACLaVAVRL												VARIANT	A -> V	17344846	1
O15197/A603P	O15197	EPHB6	EPHB6_HUMAN	A603P	-	-	-	-	GSILGaAFLLL												VARIANT	A -> P (in a colorectal cancer sample; somatic mutation)	16959974	1
O15197/A662V	O15197	EPHB6	EPHB6_HUMAN	A662V	22	N-term-β1	-	-	AIRELaEVDPA	0.267	0.357	0.376	0.688	0.657	0.463	0.566	0.489	0.599	0.558	0.493	VARIANT	A -> V (in dbSNP:rs35984674)	17344846	1
O15197/D360N	O15197	EPHB6	EPHB6_HUMAN	D360N	-	-	-	-	YRASSdPEAPC												VARIANT	D -> N (in a colorectal cancer sample; somatic mutation)	16959974	1
O15197/D930G	O15197	EPHB6	EPHB6_HUMAN	D930G	-	-	-	-	LQAGGdGERPS												VARIANT	D -> G (in a colorectal cancer sample; somatic mutation)	16959974	1
O15197/E875K	O15197	EPHB6	EPHB6_HUMAN	E875K	660	αG	-	-	VLNAIeEFRLP	0.611	0.159	0.23	0.304	0.326	0.455	0.31	0.281	0.24	0.603	0.196	VARIANT	E -> K (in a glioblastoma multiforme sample; somatic mutation)	17344846	1
O15197/G122S	O15197	EPHB6	EPHB6_HUMAN	G122S	-	-	-	neutral	LGVSGgCRETF												VARIANT	G -> S (in dbSNP:rs8177173)	17344846	1
O15197/I993V	O15197	EPHB6	EPHB6_HUMAN	I993V	-	-	-	-	LPALGiLAGHQ												VARIANT	I -> V	17344846	1
O15197/P282H	O15197	EPHB6	EPHB6_HUMAN	P282H	-	-	-	-	AGGSPpLHCNG												VARIANT	P -> H	17344846	1
O15197/P282R	O15197	EPHB6	EPHB6_HUMAN	P282R	-	-	-	-	AGGSPpLHCNG												VARIANT	P -> R (in dbSNP:rs8177143)		0
O15197/P743S	O15197	EPHB6	EPHB6_HUMAN	P743S	219	β4/β5-loop	-	-	VTKSRpMVLTE	0.277	0.333	0.39	0.595	0.544	0.514	0.502	0.444	0.465	0.569	0.491	VARIANT	P -> S (in an ovarian mucinous carcinoma sample; somatic mutation)	17344846	1
O15197/R309Q	O15197	EPHB6	EPHB6_HUMAN	R309Q	-	-	-	-	GYQPArDKACQ												VARIANT	R -> Q (in dbSNP:rs55728646)	17344846	1
O15197/R499Q	O15197	EPHB6	EPHB6_HUMAN	R499Q	-	-	-	-	VHQVSrSNSIT												VARIANT	R -> Q (in dbSNP:rs8177175)		0
O15197/R719Q	O15197	EPHB6	EPHB6_HUMAN	R719Q	149	αC	-	-	MTFLGrAVLGQ	0.737	0.131	0.132	0.262	0.236	0.392	0.238	0.249	0.294	0.614	0.157	VARIANT	R -> Q (in a colorectal cancer sample; somatic mutation)	16959974	1
O15197/R813H	O15197	EPHB6	EPHB6_HUMAN	R813H	479	A-loop;DFG-motif	-	-	VCKVArGHSPQ	0.629	0.278	0.093	0.483	0.471	0.231	0.252	0.506	0.418	0.327	0.219	VARIANT	R -> H	17344846	1
O15197/S170T	O15197	EPHB6	EPHB6_HUMAN	S170T	-	-	-	-	PSSSSsSSSSS												VARIANT	S -> T	17344846	1
O15197/S324A	O15197	EPHB6	EPHB6_HUMAN	S324A	-	-	-	neutral	RGLYKsAGNAP												VARIANT	S -> A (in dbSNP:rs8177146)	17344846	1
O15197/S332L	O15197	EPHB6	EPHB6_HUMAN	S332L	-	-	-	neutral	GNAPCsCPARS												VARIANT	S -> L (in dbSNP:rs35189999)	17344846	1
O15264/A282V	O15264	MAPK13	MK13_HUMAN	A282V	814	αH	-	-	ASPQAaLLEKM	0.893	0.05	0.057	0.117	0.104	0.311	0.135	0.135	0.09	0.686	0.085	VARIANT	A -> V (in dbSNP:rs55990045)	17344846	1
O15264/A300T	O15264	MAPK13	MK13_HUMAN	A300T	843	αI	-	neutral	KRLTAaALTHP	0.938	0.025	0.037	0.079	0.079	0.343	0.115	0.103	0.065	0.646	0.08	VARIANT	A -> T (in dbSNP:rs41270090)	17344846	1
O15264/S41L	O15264	MAPK13	MK13_HUMAN	S41L	48	β2	-	-	YGSVCsIDKRS	0.431	0.136	0.433	0.405	0.326	0.544	0.5	0.235	0.286	0.717	0.28	VARIANT	S -> L (in dbSNP:rs55776345)	17344846	1
O15264/T180A	O15264	MAPK13	MK13_HUMAN	T180A	528	A-loop	p	loss	ADAEMtYVVTR	0.039	0.858	0.103	0.954	0.972	0.264	0.802	0.821	0.963	0.224	0.521	MUTAGEN	T->A: Loss of kinase activity.	9374491	1
O15264/Y182A	O15264	MAPK13	MK13_HUMAN	Y182A	530	A-loop	p	loss	AEMTGyVTRWY	0.072	0.832	0.096	0.955	0.949	0.19	0.784	0.838	0.958	0.142	0.551	MUTAGEN	Y->A: Loss of kinase activity.	9374491	1
O15530/A277V	O15530	PDPK1	PDPK1_HUMAN	A277V	601	αF	-	increase	IYQLVaLPPFR	0.545	0.108	0.347	0.251	0.225	0.533	0.302	0.177	0.172	0.712	0.158	MUTAGEN	A->V: 3-fold increase in kinase activity.	10364160	1
O15530/R474A	O15530	PDPK1	PDPK1_HUMAN	R474A	-	-	-	-	LFARRrLLLTE												MUTAGEN	R->A: No PDGF-dependent translocation to the membrane.	9637919	1
O15530/S241A	O15530	PDPK1	PDPK1_HUMAN	S241A	529	A-loop	p	loss	QARANsVGTAQ	0.055	0.769	0.176	0.942	0.949	0.297	0.801	0.698	0.907	0.313	0.311	MUTAGEN	S->A: No activation.	10455013	1
O15530/S25A	O15530	PDPK1	PDPK1_HUMAN	S25A	-	-	p	-	LCSCPsSMVRT												MUTAGEN	S->A: No effect.	10455013	1
O15530/S393A	O15530	PDPK1	PDPK1_HUMAN	S393A	-	-	p	-	VSSSSsHSLSA												MUTAGEN	S->A: No effect.	10455013	1
O15530/S394A	O15530	PDPK1	PDPK1_HUMAN	S394A	-	-	p	-	SSSSSsSLSAS												MUTAGEN	S->A: Abolishes phosphorylation by MAP3K5; when associated with A-398.	22544756	1
O15530/S396A	O15530	PDPK1	PDPK1_HUMAN	S396A	-	-	p	-	SSSSHsSASDT												MUTAGEN	S->A: No effect.	10455013	1
O15530/S398A	O15530	PDPK1	PDPK1_HUMAN	S398A	-	-	p	-	SSHSLsSDTGL												MUTAGEN	S->A: Abolishes phosphorylation by MAP3K5; when associated with A-394.	22544756	1
O15530/S410A	O15530	PDPK1	PDPK1_HUMAN	S410A	-	-	p	-	PQRSGsIEQYI												MUTAGEN	S->A: No effect.	10455013	1
O15530/T354A	O15530	PDPK1	PDPK1_HUMAN	T354A	876	C-term-αI	p	increase	NLHQQtPKLTA	0.276	0.44	0.284	0.585	0.545	0.451	0.511	0.474	0.58	0.504	0.206	MUTAGEN	T->A: Abolishes phosphorylation by MELK.	22544756	1
O15530/T513E	O15530	PDPK1	PDPK1_HUMAN	T513E	-	-	p	increase	AKNFKtFVHTP												MUTAGEN	T->E: Enhanced kinase activity towards PKB.	20978239	1
O15530/Y373F	O15530	PDPK1	PDPK1_HUMAN	Y373F	-	-	p	decrease	DDEDCyNYDNL												MUTAGEN	Y->F: Reduction in basal activity.	11481331	1
O15530/Y376F	O15530	PDPK1	PDPK1_HUMAN	Y376F	-	-	p	decrease	DCYGNyNLLSQ												MUTAGEN	Y->F: Reduction in basal activity.	11481331	1
O15530/Y9F	O15530	PDPK1	PDPK1_HUMAN	Y9F	-	-	p	decrease	TTSQLyAVPIQ												MUTAGEN	Y->F: Slight reduction in pervanadate-stimulated tyrosine phosphorylation.	11481331	1
O43187/D431E	O43187	IRAK2	IRAK2_HUMAN	D431E	-	-	-	neutral	DLLLSdPSSTA												VARIANT	D -> E (in dbSNP:rs708035)	173448469374458	2
O43187/D469N	O43187	IRAK2	IRAK2_HUMAN	D469N	-	-	-	-	GRLPEdAEALA												VARIANT	D -> N (in dbSNP:rs56242986)	17344846	1
O43187/D574H	O43187	IRAK2	IRAK2_HUMAN	D574H	-	-	-	neutral	VGREAdSSEAC												VARIANT	D -> H (in dbSNP:rs11465930)		0
O43187/I99V	O43187	IRAK2	IRAK2_HUMAN	I99V	-	-	-	neutral	KPAPEiCPIPA												VARIANT	I -> V (in dbSNP:rs55898544)	17344846	1
O43187/L392V	O43187	IRAK2	IRAK2_HUMAN	L392V	579	A-loop	-	neutral	IRVGQlKRVDI	0.716	0.113	0.17	0.251	0.215	0.449	0.263	0.213	0.198	0.657	0.213	VARIANT	L -> V (in dbSNP:rs3844283)	17344846	1
O43187/L439V	O43187	IRAK2	IRAK2_HUMAN	L439V	-	-	-	neutral	SSTASlSRKTG												VARIANT	L -> V (in dbSNP:rs11465927)	17344846	1
O43187/L503I	O43187	IRAK2	IRAK2_HUMAN	L503I	-	-	-	neutral	AVEERlGRETL												VARIANT	L -> I (in dbSNP:rs9854688)	17344846	1
O43187/P421T	O43187	IRAK2	IRAK2_HUMAN	P421T	642	αG	-	-	DNNRSpYLKDL	0.32	0.32	0.36	0.506	0.441	0.485	0.435	0.436	0.405	0.563	0.393	VARIANT	P -> T (in a lung adenocarcinoma sample; somatic mutation)	17344846	1
O43187/R147T	O43187	IRAK2	IRAK2_HUMAN	R147T	-	-	-	neutral	GSSPArHQPAF												VARIANT	R -> T (in dbSNP:rs56053222)	17344846	1
O43187/R214G	O43187	IRAK2	IRAK2_HUMAN	R214G	35	β1	-	-	DFNQNrISQGT	0.749	0.086	0.165	0.189	0.182	0.421	0.218	0.159	0.176	0.676	0.159	VARIANT	R -> G (in dbSNP:rs35060588)	17344846	1
O43187/R43Q	O43187	IRAK2	IRAK2_HUMAN	R43Q	-	-	-	-	DLTQLrIKSME												VARIANT	R -> Q (in dbSNP:rs34945585)	17344846	1
O43187/R566W	O43187	IRAK2	IRAK2_HUMAN	R566W	-	-	-	neutral	GEGRLrIVGRE												VARIANT	R -> W (in dbSNP:rs55740652)	17344846	1
O43187/S249L	O43187	IRAK2	IRAK2_HUMAN	S249L	141	αC	-	-	CSSPGsERFFQ	0.482	0.182	0.336	0.332	0.298	0.529	0.35	0.274	0.234	0.672	0.288	VARIANT	S -> L (in a lung adenocarcinoma sample; somatic mutation)	17344846	1
O43187/S47Y	O43187	IRAK2	IRAK2_HUMAN	S47Y	-	-	-	neutral	LRKIKsERVQG												VARIANT	S -> Y (in dbSNP:rs11465864)	17344846	1
O43283/E44K	O43283	MAP3K13	M3K13_HUMAN	E44K	-	-	-	-	SPKLLeQQEKG												VARIANT	E -> K (in dbSNP:rs35266179)		0
O43283/E712K	O43283	MAP3K13	M3K13_HUMAN	E712K	-	-	-	-	CWRSSeDKGQA												VARIANT	E -> K (in dbSNP:rs56309231)	17344846	1
O43283/K195A	O43283	MAP3K13	M3K13_HUMAN	K195A	96	β3;Catalytic-Lys	-	loss	EEVAIkVREQN	0.003	0.996	0.001	0.992	0.992	0.018	0.644	0.99	0.988	0.013	0.56	MUTAGEN	K->A: Kinase inactive. Fails to activate NF-kappa-B.	12492477	1
O43283/P746L	O43283	MAP3K13	M3K13_HUMAN	P746L	-	-	-	-	GSLDIpAEPVG												VARIANT	P -> L (in a metastatic melanoma sample; somatic mutation)	17344846	1
O43283/R517G	O43283	MAP3K13	M3K13_HUMAN	R517G	-	-	-	-	PGTYKrPVRPI												VARIANT	R -> G (in dbSNP:rs56408536)	17344846	1
O43283/R915H	O43283	MAP3K13	M3K13_HUMAN	R915H	-	-	-	-	ECAVRrKTQMS												VARIANT	R -> H (in dbSNP:rs3732576)		0
O43293/D161A	O43293	DAPK3	DAPK3_HUMAN	D161A	479	A-loop;DFG-motif	-	loss	RIKLIdGIAHK	0.008	0.987	0.005	0.967	0.97	0.06	0.619	0.964	0.958	0.028	0.623	MUTAGEN	D->A: Loss of kinase activity.	17158456	1
O43293/D161N	O43293	DAPK3	DAPK3_HUMAN	D161N	479	A-loop;DFG-motif	-	decrease	RIKLIdGIAHK	0.02	0.945	0.035	0.934	0.946	0.076	0.623	0.905	0.926	0.063	0.587	VARIANT	D -> N (in an ovarian mucinous carcinoma sample; somatic mutation; greatly reduces kinase activity, increases cell proliferation and cell survival)	1.73448e+15	2
O43293/K42A	O43293	DAPK3	DAPK3_HUMAN	K42A	96	β3;Catalytic-Lys	-	loss	KEYAAkIKKRR	0.003	0.996	0.002	0.996	0.991	0.009	0.671	0.993	0.995	0.009	0.541	MUTAGEN	K->A: Loss of kinase activity at low concentrations of ATP.	17158456	1
O43293/L441A	O43293	DAPK3	DAPK3_HUMAN	L441A	-	-	-	-	DLVRAlQEKLQ												MUTAGEN	L->A: Predominantly nuclear localization; when associated with A-427 and A-434.	15611134	1
O43293/P216S	O43293	DAPK3	DAPK3_HUMAN	P216S	610	αF/αG-loop	-	decrease	LSGASpLGETK	0.16	0.517	0.323	0.664	0.7	0.393	0.586	0.552	0.635	0.469	0.517	VARIANT	P -> S (in a lung neuroendocrine carcinoma sample; somatic mutation; greatly reduces kinase activity, increases cell proliferation, cell adhesion and cell survival)	1.73448e+15	2
O43293/T112M	O43293	DAPK3	DAPK3_HUMAN	T112M	365	αD/αE-loop	-	decrease	EKESLtDEATQ	0.421	0.283	0.297	0.417	0.349	0.416	0.348	0.338	0.36	0.563	0.349	VARIANT	T -> M (in a colorectal adenocarcinoma sample; somatic mutation; greatly reduces kinase activity, increases cell proliferation and cell survival)	1.73448e+15	2
O43293/T180A	O43293	DAPK3	DAPK3_HUMAN	T180A	536	A-loop	p	decrease	KNIFGtEFVAP	0.128	0.702	0.17	0.874	0.862	0.307	0.71	0.767	0.888	0.25	0.512	MUTAGEN	T->A: Greatly reduced kinase activity.	21487036	1
O43293/T225A	O43293	DAPK3	DAPK3_HUMAN	T225A	654	αG	p	loss	ETKQEtTNISA	0.124	0.556	0.32	0.737	0.759	0.472	0.603	0.502	0.673	0.489	0.447	MUTAGEN	T->A: Loss of kinase activity.	17158456	1
O43293/T265A	O43293	DAPK3	DAPK3_HUMAN	T265A	834	αI	p	loss	PKRRMtAQSLE	0.154	0.625	0.221	0.697	0.688	0.391	0.679	0.6	0.723	0.443	0.414	MUTAGEN	T->A: Loss of phosphorylation by ROCK1, catalytically inactive.	17158456	1
O43293/T299A	O43293	DAPK3	DAPK3_HUMAN	T299A	876	C-term-αI	p	loss	RRRLKtRLKEY	0.432	0.318	0.25	0.476	0.52	0.422	0.432	0.356	0.466	0.537	0.156	MUTAGEN	T->A: Loss of phosphorylation by ROCK1.	17158456	1
O43293/T299D	O43293	DAPK3	DAPK3_HUMAN	T299D	876	C-term-αI	p	-	RRRLKtRLKEY	0.212	0.345	0.443	0.607	0.515	0.635	0.58	0.286	0.492	0.679	0.269	MUTAGEN	T->D: Predominantly cytoplasmic localization; phosphomimetic.	15611134	1
O43293/V427A	O43293	DAPK3	DAPK3_HUMAN	V427A	-	-	-	-	ALAKQvSEMRF												MUTAGEN	V->A: Predominantly nuclear localization; when associated with A-434 and A-441.	15611134	1
O43293/V434A	O43293	DAPK3	DAPK3_HUMAN	V434A	-	-	-	-	SEMRFvDLVRA												MUTAGEN	V->A: Predominantly nuclear localization; when associated with A-427 and A-441.	15611134	1
O43318/E70Q	O43318	MAP3K7	M3K7_HUMAN	E70Q	121	αC	-	-	IESESeKAFIV	0.536	0.209	0.255	0.313	0.267	0.467	0.306	0.257	0.218	0.633	0.269	VARIANT	E -> Q (in FMD2; dbSNP:rs886039231)	27426733	1
O43318/G110C	O43318	MAP3K7	M3K7_HUMAN	G110C	240	β5/αD-loop	-	-	EYAEGgLYNVL	0.166	0.374	0.46	0.76	0.701	0.487	0.626	0.508	0.645	0.531	0.729	VARIANT	G -> C (in CSCF; dbSNP:rs886039235)	27426734	1
O43318/G168R	O43318	MAP3K7	M3K7_HUMAN	G168R	472	Catalytic-loop	-	-	LLVAGgVLKIC	0.233	0.319	0.448	0.565	0.543	0.518	0.535	0.397	0.512	0.623	0.481	VARIANT	G -> R (in FMD2; increases autophosphorylation; no effect on MAPK signaling; no effect on NF-kappa-B signaling; dbSNP:rs886039233)	27426733	1
O43318/K158R	O43318	MAP3K7	M3K7_HUMAN	K158R	428	Catalytic-loop	ub	-	IHRDLkPNLLL	0.179	0.58	0.241	0.732	0.772	0.335	0.645	0.637	0.75	0.317	0.41	MUTAGEN	K->R: Abolishes ubiquitination.	29291351	1
O43318/K209R	O43318	MAP3K7	M3K7_HUMAN	K209R	584	αF	ub	-	SNYSEkDVFSW	0.325	0.331	0.343	0.505	0.528	0.438	0.522	0.341	0.429	0.531	0.281	MUTAGEN	K->R: Strongly decreases ubiquitination.	29291351	1
O43318/K34R	O43318	MAP3K7	M3K7_HUMAN	K34R	29	N-term-β1	-	-	EEIDYkIEVEE	0.722	0.097	0.181	0.309	0.249	0.405	0.223	0.195	0.261	0.607	0.218	MUTAGEN	K->R: No effect on ubiquitination.	29291351	1
O43318/K63W	O43318	MAP3K7	M3K7_HUMAN	K63W	96	β3;Catalytic-Lys	-	loss	KDVAIkIESES	0	0.992	0.008	0.996	0.992	0.03	0.709	0.991	0.992	0.018	0.536	MUTAGEN	K->W: Loss of kinase activity. Loss of autophosphorylation.	1.25891e+15	2
O43318/P512A	O43318	MAP3K7	M3K7_HUMAN	P512A	-	-	-	-	LQPLApPNSKE												MUTAGEN	P->R,A: Enhances autophosphorylation; Alters MAPK signaling.	27426733	1
O43318/P512L	O43318	MAP3K7	M3K7_HUMAN	P512L	-	-	-	increase	LQPLApPNSKE												VARIANT	P -> L (in FMD2; does not affect interaction with TAB2; does not affect homodimerization; increases autophosphorylation; increases MAPK signaling; increases NF-kappa-B signaling; dbSNP:rs886039230)	27426733	1
O43318/P512R	O43318	MAP3K7	M3K7_HUMAN	P512R	-	-	-	-	LQPLApPNSKE												MUTAGEN	P->R,A: Enhances autophosphorylation; Alters MAPK signaling.	27426733	1
O43318/R410Q	O43318	MAP3K7	M3K7_HUMAN	R410Q	-	-	-	-	YSKPKrHRKTA												VARIANT	R -> Q (found in a consanguineous family with intellectual disability; unknown pathological significance; dbSNP:rs201721045)	28397838	1
O43318/V100E	O43318	MAP3K7	M3K7_HUMAN	V100E	227	β4/β5-loop	-	-	ACLNPvLVMEY	0.283	0.343	0.374	0.611	0.557	0.473	0.536	0.48	0.564	0.55	0.522	VARIANT	V -> E (in FMD2; dbSNP:rs886039232)	27426733	1
O43318/W241R	O43318	MAP3K7	M3K7_HUMAN	W241R	651	αG	-	-	AFRIMwVHNGT	0.258	0.288	0.454	0.587	0.543	0.458	0.524	0.471	0.537	0.496	0.479	VARIANT	W -> R (in CSCF; dbSNP:rs886039237)	27426734	1
O43353/D146N	O43353	RIPK2	RIPK2_HUMAN	D146N	426	Catalytic-loop;HrD-motif	-	loss	PLLHHdKTQNI	0.028	0.834	0.138	0.94	0.961	0.282	0.696	0.856	0.938	0.189	0.564	MUTAGEN	D->N: Abolishes kinase activity.	9705938	1
O43353/D467R	O43353	RIPK2	RIPK2_HUMAN	D467R	-	-	-	-	ALLSRdIMKED												MUTAGEN	D->R: Decreased interaction with NGFR.	26646181	1
O43353/E500R	O43353	RIPK2	RIPK2_HUMAN	E500R	-	-	-	-	DIQGEeAKVIV												MUTAGEN	E->R: Decreased interaction with NGFR.	26646181	1
O43353/I259T	O43353	RIPK2	RIPK2_HUMAN	I259T	799	αG/αH-loop	-	neutral	SLPYDiHRARM	0.575	0.148	0.277	0.222	0.194	0.481	0.285	0.21	0.17	0.692	0.266	VARIANT	I -> T (in dbSNP:rs2230801)	17344846	1
O43353/I496A	O43353	RIPK2	RIPK2_HUMAN	I496A	-	-	-	-	LDTTDiGEEFA												MUTAGEN	I->A: Decreased interaction with NGFR.	26646181	1
O43353/K209R	O43353	RIPK2	RIPK2_HUMAN	K209R	584	αF	ub	decrease	SRASIkDIYSY	0.29	0.37	0.34	0.561	0.56	0.441	0.497	0.423	0.463	0.526	0.305	MUTAGEN	K->R: Complete loss of polyubiquitination.	18079694	1
O43353/K313N	O43353	RIPK2	RIPK2_HUMAN	K313N	876	C-term-αI	-	-	QLKKTkQSVSS	0.603	0.197	0.2	0.302	0.32	0.443	0.264	0.316	0.267	0.614	0.188	VARIANT	K -> N (in dbSNP:rs35395048)	17344846	1
O43353/K471E	O43353	RIPK2	RIPK2_HUMAN	K471E	-	-	-	-	RDLIMkDYELV												MUTAGEN	K->E: Decreased interaction with NGFR.	26646181	1
O43353/K47A	O43353	RIPK2	RIPK2_HUMAN	K47A	96	β3;Catalytic-Lys	-	loss	VQVAVkLHIHT	0.003	0.996	0.001	0.994	0.985	0.011	0.615	0.992	0.992	0.015	0.508	MUTAGEN	K->A: Abolishes kinase activity.	95751819642260	2
O43353/K47M	O43353	RIPK2	RIPK2_HUMAN	K47M	96	β3;Catalytic-Lys	-	-	VQVAVkLHIHT	0	0.997	0.003	0.99	0.992	0.009	0.672	0.993	0.994	0.014	0.538	MUTAGEN	K->M: Reduces FAS-mediated apoptosis.	95751819642260	2
O43353/K503R	O43353	RIPK2	RIPK2_HUMAN	K503R	-	-	-	increase	GEEFAkIVQKL												MUTAGEN	K->R: Abolished ubiquitination by ZNRF4.	28656966	1
O43353/L268V	O43353	RIPK2	RIPK2_HUMAN	L268V	818	αH	-	neutral	ARMISlESGWA	0.516	0.232	0.252	0.373	0.363	0.467	0.354	0.353	0.315	0.621	0.401	VARIANT	L -> V (in dbSNP:rs35004667)	17344846	1
O43353/Q437E	O43353	RIPK2	RIPK2_HUMAN	Q437E	-	-	-	-	QPGIAqWIQSK												MUTAGEN	Q->E: Decreased interaction with NGFR.	26646181	1
O43353/R444E	O43353	RIPK2	RIPK2_HUMAN	R444E	-	-	-	-	WIQSKrDIVNQ												MUTAGEN	R->E: Abolishes interaction with NOD1.	17054981	1
O43353/R483E	O43353	RIPK2	RIPK2_HUMAN	R483E	-	-	-	-	STKPTrSKVRQ												MUTAGEN	R->E: Abolishes interaction with NOD1.	17054981	1
O43353/R488E	O43353	RIPK2	RIPK2_HUMAN	R488E	-	-	-	-	RTSKVrLLDTT												MUTAGEN	R->E: Abolishes interaction with NOD1.	17054981	1
O43353/R528E	O43353	RIPK2	RIPK2_HUMAN	R528E	-	-	-	-	ILVVSrPSLNL												MUTAGEN	R->E: Decreased interaction with NGFR.	26646181	1
O43353/Y381A	O43353	RIPK2	RIPK2_HUMAN	Y381A	-	-	p	decrease	KAQDCyMKLHH												MUTAGEN	Y->A: Prevents phosphorylation. Reduces serine and threonine phosphorylation of ARHGEF2.	21887730	1
O43353/Y474F	O43353	RIPK2	RIPK2_HUMAN	Y474F	-	-	p	-	IMKEDyLVSTK												MUTAGEN	Y->F: Decreases interaction with NOD2.	21123652	1
O43683/A106D	O43683	BUB1	BUB1_HUMAN	A106D	-	-	-	-	LYIAWaHLEAQ												MUTAGEN	A->D,W: Loss of interaction with KNL1.	17981135	1
O43683/A106W	O43683	BUB1	BUB1_HUMAN	A106W	-	-	-	-	LYIAWaHLEAQ												MUTAGEN	A->D,W: Loss of interaction with KNL1.	17981135	1
O43683/A130S	O43683	BUB1	BUB1_HUMAN	A130S	-	-	-	-	GIQNQaPREFL												MUTAGEN	A->S: Partial rescue of the spindle-assembly checkpoint activity. Increased rate of chromosome congression errors. Impaired localization to kinetochores and loss of kinetochore binding of CENPF, SGO1 and BUBR1 but not of MCAK, MAD1L1 or MAD2L1.	19487456	1
O43683/E36D	O43683	BUB1	BUB1_HUMAN	E36D	-	-	-	-	IQWVEeFPENK												VARIANT	E -> D (in colorectal cancer; dbSNP:rs1801328)	10366450	1
O43683/E536A	O43683	BUB1	BUB1_HUMAN	E536A	-	-	-	-	EDGNKeYGLPQ												MUTAGEN	E->A: Loss of ubiquitination and CDH1-dependent degradation; when associated with A-535 and A-537.	17158872	1
O43683/E626A	O43683	BUB1	BUB1_HUMAN	E626A	-	-	-	-	ILEDKeVVAKQ												MUTAGEN	E->A: Loss of ubiquitination and CDH1-dependent degradation; when associated with A-625 and A-627.	17158872	1
O43683/G20D	O43683	BUB1	BUB1_HUMAN	G20D	-	-	-	-	MQSYKgDPLGE												VARIANT	G -> D (in dbSNP:rs35890336)	17344846	1
O43683/H265N	O43683	BUB1	BUB1_HUMAN	H265N	-	-	-	-	NQRRKhQWVNE												VARIANT	H -> N (in pancreatic cancer; associated with C-259; complete rescue of the spindle-assembly checkpoint activity; increased rate of chromosome congression errors)	1.26556e+15	2
O43683/K535A	O43683	BUB1	BUB1_HUMAN	K535A	-	-	ub	-	FEDGNkNYGLP												MUTAGEN	K->A: Loss of ubiquitination and CDH1-dependent degradation; when associated with A-536 and A-537.	17158872	1
O43683/K625A	O43683	BUB1	BUB1_HUMAN	K625A	-	-	-	-	HILEDkNVVAK												MUTAGEN	K->A: Loss of ubiquitination and CDH1-dependent degradation; when associated with A-626 and A-627.	17158872	1
O43683/K821A	O43683	BUB1	BUB1_HUMAN	K821A	107	β3/αC-loop	-	loss	QKFVLkQKPAN	0.125	0.583	0.291	0.763	0.748	0.393	0.577	0.623	0.759	0.426	0.538	MUTAGEN	K->A: Loss of activity.	10198256	1
O43683/L122G	O43683	BUB1	BUB1_HUMAN	L122G	-	-	-	-	HASAVlRGIQN												MUTAGEN	L->G: Loss of interaction with KNL1.	17981135	1
O43683/N534D	O43683	BUB1	BUB1_HUMAN	N534D	-	-	-	-	VFEDGnENYGL												VARIANT	N -> D (in dbSNP:rs36109304)	17344846	1
O43683/N537A	O43683	BUB1	BUB1_HUMAN	N537A	-	-	-	-	DGNKEnGLPQP												MUTAGEN	N->A: Loss of ubiquitination and CDH1-dependent degradation; when associated with A-535 and A-536.	17158872	1
O43683/N627A	O43683	BUB1	BUB1_HUMAN	N627A	-	-	-	-	LEDKEnVAKQC												MUTAGEN	N->A: Loss of ubiquitination and CDH1-dependent degradation; when associated with A-625 and A-626.	17158872	1
O43683/P648R	O43683	BUB1	BUB1_HUMAN	P648R	-	-	-	-	ENMVVpRDGKF												VARIANT	P -> R (in colorectal cancer; dbSNP:rs376649190)	10366450	1
O43683/S492Y	O43683	BUB1	BUB1_HUMAN	S492Y	-	-	-	-	KDEWQsDQNED												VARIANT	S -> Y (in colorectal cancer; dbSNP:rs121909055)	9521327	1
O43683/T609A	O43683	BUB1	BUB1_HUMAN	T609A	-	-	p	-	AQLAStFHKLP												MUTAGEN	T->A: Diminished interaction with PLK1.	16760428	1
O43683/Y259C	O43683	BUB1	BUB1_HUMAN	Y259C	-	-	-	-	LRAQKyQRRKH												VARIANT	Y -> C (in pancreatic cancer; associated with N-265; failure to rescue the spindle-assembly checkpoint activity as a result of a deficient recruitment of MAD2L1 and BUBR1 to kinetochores; efficient restoration of chromosome congression; reduced binding to BUB3; rescue of the ability of kinetochores to bind SGO1 and CENPF but not MCAK)	1.26556e+15	2
O43781/K238M	O43781	DYRK3	DYRK3_HUMAN	K238M	96	β3;Catalytic-Lys	-	loss	QYVALkVRNEK	0	0.999	0.001	0.996	0.996	0.01	0.696	0.992	0.994	0.011	0.54	MUTAGEN	K->M: Kinase dead; Induces formation of stress granules-like in absence of stress. Impaired dissolution of membraneless organelles during mitosis, such as stress granules, nuclear speckles and pericentriolar material.	2.34152e+23	3
O43781/M239L	O43781	DYRK3	DYRK3_HUMAN	M239L	97	β3	-	-	YVALKmRNEKR	0.386	0.283	0.331	0.46	0.453	0.488	0.417	0.417	0.456	0.556	0.336	VARIANT	M -> L	17344846	1
O43781/S350A	O43781	DYRK3	DYRK3_HUMAN	S350A	474	Catalytic-loop	p	decrease	HHGRSsKVIDF	0.305	0.292	0.402	0.504	0.565	0.385	0.468	0.306	0.441	0.537	0.227	MUTAGEN	S->A: Decreased stability of the protein.	29634919	1
O43781/S350D	O43781	DYRK3	DYRK3_HUMAN	S350D	474	Catalytic-loop	p	increase	HHGRSsKVIDF	0.177	0.167	0.656	0.57	0.576	0.732	0.605	0.193	0.427	0.763	0.241	MUTAGEN	S->E,D: Phosphomimetic mutant; increased stability of the protein.	29634919	1
O43781/S350E	O43781	DYRK3	DYRK3_HUMAN	S350E	474	Catalytic-loop	p	increase	HHGRSsKVIDF	0.204	0.137	0.659	0.569	0.556	0.729	0.629	0.162	0.428	0.767	0.228	MUTAGEN	S->E,D: Phosphomimetic mutant; increased stability of the protein.	29634919	1
O60229/E1326D	O60229	KALRN	KALRN_HUMAN	E1326D	-	-	-	-	GILNKeIIFGN												VARIANT	E -> D (in dbSNP:rs2289838)		0
O60229/R213W	O60229	KALRN	KALRN_HUMAN	R213W	-	-	-	-	QEMLArEFPVD												VARIANT	R -> W (in a colorectal cancer sample; somatic mutation; dbSNP:rs1187034389)	16959974	1
O60229/S196L	O60229	KALRN	KALRN_HUMAN	S196L	-	-	-	-	EEFFNsVHLLS												VARIANT	S -> L	17344846	1
O60285/G419D	O60285	NUAK1	NUAK1_HUMAN	G419D	-	-	-	-	TGFIEgVGPAL												VARIANT	G -> D (in dbSNP:rs55774704)	17344846	1
O60285/K84A	O60285	NUAK1	NUAK1_HUMAN	K84A	96	β3;Catalytic-Lys	-	loss	RVVAIkIRKDK	0.003	0.996	0.002	0.996	0.991	0.009	0.688	0.993	0.995	0.011	0.531	MUTAGEN	K->A: Abolishes kinase activity and ability to induce senescence.	1.99271e+15	2
O60285/P543R	O60285	NUAK1	NUAK1_HUMAN	P543R	-	-	-	-	PALVSpMPTLE												VARIANT	P -> R (in dbSNP:rs3741883)	17344846	1
O60285/S600A	O60285	NUAK1	NUAK1_HUMAN	S600A	-	-	p	loss	RQRIRsVSAEN												MUTAGEN	S->A: Abrogates phosphorylation by PKB/AKT1. Does not affect ability to induce senescence.	1.24093e+15	2
O60285/T211A	O60285	NUAK1	NUAK1_HUMAN	T211A	529	A-loop	p	loss	DKFLQtCGSPL	0.011	0.919	0.07	0.97	0.963	0.252	0.895	0.809	0.98	0.23	0.546	MUTAGEN	T->A: Prevents phosphorylation and activation by STK11/LKB1 complex. Abolishes ability to induce senescence.	1.49766e+23	3
O60307/F655L	O60307	MAST3	MAST3_HUMAN	F655L	867	C-term-αI	-	-	RHKAEfPQLEA	0.168	0.381	0.451	0.673	0.652	0.507	0.581	0.497	0.634	0.535	0.536	VARIANT	F -> L (found in a patient with autism spectrum disorder without history of seizures; unknown pathological significance)	34185323	1
O60307/G510S	O60307	MAST3	MAST3_HUMAN	G510S	481	A-loop;DFG-motif	-	-	KLTDFgSKIGL	0.093	0.367	0.54	0.797	0.832	0.594	0.763	0.484	0.799	0.583	0.655	VARIANT	G -> S (in DEE108)	34185323	1
O60307/G515S	O60307	MAST3	MAST3_HUMAN	G515S	492	A-loop	-	-	GLSKIgMSMAT	0.244	0.379	0.378	0.663	0.628	0.54	0.596	0.417	0.621	0.528	0.52	VARIANT	G -> S (in DEE108)	3.41853e+15	2
O60307/G861S	O60307	MAST3	MAST3_HUMAN	G861S	-	-	-	neutral	RPLDAgGRRLG												VARIANT	G -> S (in dbSNP:rs8108738)		0
O60307/G883S	O60307	MAST3	MAST3_HUMAN	G883S	-	-	-	-	RASSSgSGGGS												VARIANT	G -> S (in dbSNP:rs369960905)	17344846	1
O60307/L516P	O60307	MAST3	MAST3_HUMAN	L516P	493	A-loop	-	-	LSKIGlSMATN	0.183	0.274	0.543	0.697	0.642	0.588	0.685	0.434	0.607	0.576	0.607	VARIANT	L -> P (in DEE108)	3.41853e+15	2
O60307/R203Q	O60307	MAST3	MAST3_HUMAN	R203Q	-	-	-	-	YAPGArALADG												VARIANT	R -> Q (in dbSNP:rs35945810)		0
O60307/R406P	O60307	MAST3	MAST3_HUMAN	R406P	120	αC	-	-	QNLILrQIQQV	0.239	0.328	0.434	0.614	0.566	0.506	0.582	0.431	0.584	0.609	0.424	VARIANT	R -> P (in DEE108)	34185323	1
O60307/S101F	O60307	MAST3	MAST3_HUMAN	S101F	-	-	-	-	TNTPSsLSSSS												VARIANT	S -> F (in DEE108; unknown pathological significance)	35095415	1
O60307/S104L	O60307	MAST3	MAST3_HUMAN	S104L	-	-	-	-	PSSTLsSSSSR												VARIANT	S -> L (in DEE108)	35095415	1
O60307/V551L	O60307	MAST3	MAST3_HUMAN	V551L	545	A-loop	-	-	YIAPEvFRQGY	0.339	0.288	0.373	0.472	0.482	0.536	0.498	0.373	0.42	0.608	0.469	VARIANT	V -> L (in DEE108; unknown pathological significance)	34185323	1
O60566/A159W	O60566	BUB1B	BUB1B_HUMAN	A159W	-	-	-	-	FYISWaEYEAR												MUTAGEN	A->W: Loss of interaction with KNL1.	17981135	1
O60566/D579E	O60566	BUB1B	BUB1B_HUMAN	D579E	-	-	-	increase	SPDVCdFTGIE												MUTAGEN	D->E: Abolishes the cleavage by caspase-3.	16227576	1
O60566/D610E	O60566	BUB1B	BUB1B_HUMAN	D610E	-	-	-	increase	PEDTCdARAAR												MUTAGEN	D->E: Abolishes the cleavage by caspase-3.	16227576	1
O60566/E390D	O60566	BUB1B	BUB1B_HUMAN	E390D	-	-	-	neutral	HQQASeKKEKM												VARIANT	E -> D (in dbSNP:rs1017842)	17344846	1
O60566/F175A	O60566	BUB1B	BUB1B_HUMAN	F175A	-	-	-	-	KADAIfEGIQQ												MUTAGEN	F->A: Loss of interaction with KNL1.	17981135	1
O60566/I909T	O60566	BUB1B	BUB1B_HUMAN	I909T	477	Catalytic-loop	-	-	NQALKiDFSYS	0.317	0.34	0.343	0.552	0.513	0.408	0.475	0.435	0.492	0.578	0.481	VARIANT	I -> T (in MVA1; heterozygous compound with nonsense mutation; dbSNP:rs28989184)	15475955	1
O60566/K795A	O60566	BUB1B	BUB1B_HUMAN	K795A	4	N-term-β1	-	loss	ELTVIkSSQPV	0.117	0.519	0.364	0.741	0.787	0.509	0.688	0.529	0.762	0.53	0.527	MUTAGEN	K->A: Does not abolish the capacity to inhibit APC/CDC20.	1.17028e+15	2
O60566/K795R	O60566	BUB1B	BUB1B_HUMAN	K795R	4	N-term-β1	-	loss	ELTVIkSSQPV	0.24	0.385	0.375	0.581	0.571	0.502	0.503	0.426	0.396	0.568	0.433	MUTAGEN	K->R: Inhibits kinase activity.	1.17028e+15	2
O60566/L1012P	O60566	BUB1B	BUB1B_HUMAN	L1012P	-	-	-	-	ATVSVlELAAE												VARIANT	L -> P (in MVA1; heterozygous compound with nonsense mutation; dbSNP:rs28989185)	15475955	1
O60566/L844F	O60566	BUB1B	BUB1B_HUMAN	L844F	249	αD	-	-	INCFTlDLLQH	0.328	0.335	0.337	0.442	0.469	0.409	0.457	0.4	0.458	0.495	0.465	VARIANT	L -> F (in MVA1; associated with H-921; heterozygous compound with nonsense mutation; dbSNP:rs28989181)	15475955	1
O60566/M15T	O60566	BUB1B	BUB1B_HUMAN	M15T	-	-	-	-	ALSEAmLEGDE												VARIANT	M -> T (in a colorectal cancer cell line; dbSNP:rs1392369693)	9521327	1
O60566/P378S	O60566	BUB1B	BUB1B_HUMAN	P378S	-	-	-	-	KEEGDpQRVQS												VARIANT	P -> S (in dbSNP:rs17851677)	15489334	1
O60566/Q921H	O60566	BUB1B	BUB1B_HUMAN	Q921H	503	A-loop	-	-	VDLRVqDVFTL	0.346	0.261	0.393	0.579	0.492	0.52	0.572	0.351	0.382	0.625	0.415	VARIANT	Q -> H (in MVA1; associated with F-844; heterozygous compound with nonsense mutation; dbSNP:rs28989183)	15475955	1
O60566/R349Q	O60566	BUB1B	BUB1B_HUMAN	R349Q	-	-	-	neutral	VEETArPVMTP												VARIANT	R -> Q (in dbSNP:rs1801376)	1.03665e+59	8
O60566/R36Q	O60566	BUB1B	BUB1B_HUMAN	R36Q	-	-	-	-	PLRQGrMSTLQ												VARIANT	R -> Q (in PCS; dbSNP:rs534297115)	16411201	1
O60566/R550Q	O60566	BUB1B	BUB1B_HUMAN	R550Q	-	-	-	-	PADPPrLAQRR												VARIANT	R -> Q (in MVA1; heterozygous compound with nonsense mutation; dbSNP:rs28989187)	15475955	1
O60566/R814H	O60566	BUB1B	BUB1B_HUMAN	R814H	23	N-term-β1	-	-	LKLKErNEDFD	0.196	0.456	0.348	0.656	0.646	0.425	0.55	0.457	0.675	0.513	0.393	VARIANT	R -> H (in MVA1; heterozygous compound with nonsense mutation; dbSNP:rs28989182)	15475955	1
O60566/T40M	O60566	BUB1B	BUB1B_HUMAN	T40M	-	-	-	neutral	GRIMStQGALA												VARIANT	T -> M (in dbSNP:rs56079734)	17344846	1
O60566/T620A	O60566	BUB1B	BUB1B_HUMAN	T620A	-	-	p	-	ARFVStFHEIM												MUTAGEN	T->A: Induces chromosome congression defects and mitotic delay.	17785528	1
O60566/V618A	O60566	BUB1B	BUB1B_HUMAN	V618A	-	-	-	neutral	RAARFvTPFHE												VARIANT	V -> A (in dbSNP:rs1801528)	1.03665e+15	2
O60674/A377E	O60674	JAK2	JAK2_HUMAN	A377E	-	-	-	-	YYRLTaAHHYL												VARIANT	A -> E (in dbSNP:rs55953208)	17344846	1
O60674/D584E	O60674	JAK2	JAK2_HUMAN	D584E	102	β3/αC-loop	-	-	LLKVLdAHRNY	0.295	0.329	0.376	0.506	0.496	0.457	0.527	0.397	0.556	0.569	0.404	VARIANT	D -> E (in dbSNP:rs17490221)		0
O60674/G127D	O60674	JAK2	JAK2_HUMAN	G127D	-	-	-	-	RWYCSgNRAYR												VARIANT	G -> D (in dbSNP:rs56118985)	17344846	1
O60674/K191Q	O60674	JAK2	JAK2_HUMAN	K191Q	-	-	-	-	MMRIAkNDQTP												VARIANT	K -> Q (in an ovarian serous carcinoma sample; somatic mutation)	17344846	1
O60674/K346R	O60674	JAK2	JAK2_HUMAN	K346R	-	-	-	-	VVTIHkDGKNL												VARIANT	K -> R (in dbSNP:rs55667734)	17344846	1
O60674/K539L	O60674	JAK2	JAK2_HUMAN	K539L	-	-	-	-	QMVFHkRNEDL												VARIANT	K -> L (in myeloproliferative disorder with erythrocytosis; requires 2 nucleotide substitutions; dbSNP:rs121912473)	17267906	1
O60674/K607N	O60674	JAK2	JAK2_HUMAN	K607N	172	αC/β4-loop	-	-	SKLSHkLVLNY	0.807	0.085	0.108	0.146	0.164	0.487	0.221	0.164	0.113	0.667	0.255	VARIANT	K -> N (in AML; dbSNP:rs121912472)	16247455	1
O60674/L393V	O60674	JAK2	JAK2_HUMAN	L393V	-	-	-	neutral	APPAVlNIQSN												VARIANT	L -> V (in dbSNP:rs2230723)	17344846	1
O60674/R1063H	O60674	JAK2	JAK2_HUMAN	R1063H	623	αF/αG-loop	-	neutral	PAEFMrIGNDK	0.699	0.133	0.168	0.201	0.193	0.484	0.248	0.187	0.154	0.675	0.148	VARIANT	R -> H (in dbSNP:rs41316003)	17344846	1
O60674/V617F	O60674	JAK2	JAK2_HUMAN	V617F	187	β4/β5-loop	-	activating	NYGVCvGDENI	0.321	0.22	0.459	0.484	0.435	0.583	0.498	0.334	0.345	0.69	0.411	VARIANT	V -> F (in PV, THCYT3 and AML; associated with susceptibility to Budd-Chiari syndrome; somatic mutation in a high percentage of patients with essential thrombocythemia or myelofibrosis; leads to constitutive tyrosine phosphorylation activity that promotes cytokine hypersensitivity; dbSNP:rs77375493)	1.57811e+47	6
O60674/V617I	O60674	JAK2	JAK2_HUMAN	V617I	187	β4/β5-loop	-	-	NYGVCvGDENI	0.696	0.083	0.22	0.194	0.176	0.495	0.241	0.131	0.112	0.722	0.17	VARIANT	V -> I (in THCYT3; dbSNP:rs77375493)	22397670	1
O60885/A371G	O60885	BRD4	BRD4_HUMAN	A371G	-	-	-	-	AKKHAaAWPFY												VARIANT	A -> G (in dbSNP:rs55805532)	17344846	1
O60885/N140A	O60885	BRD4	BRD4_HUMAN	N140A	-	-	-	-	NCYIYnPGDDI												MUTAGEN	N->A: Abolishes binding to acetylated histones.	2.24643e+15	2
O60885/N433A	O60885	BRD4	BRD4_HUMAN	N433A	-	-	-	-	NCYKYnPDHEV												MUTAGEN	N->A: Abolishes binding to acetylated histones.	22464331	1
O60885/P37S	O60885	BRD4	BRD4_HUMAN	P37S	-	-	-	-	QAQPQpNAAST												VARIANT	P -> S (in dbSNP:rs35177876)	17344846	1
O60885/R1097H	O60885	BRD4	BRD4_HUMAN	R1097H	-	-	-	neutral	KKQELrASVVQ												VARIANT	R -> H (in dbSNP:rs35676845)		0
O60885/R669H	O60885	BRD4	BRD4_HUMAN	R669H	-	-	-	-	LRELErVTSCL												VARIANT	R -> H (in dbSNP:rs35824241)	17344846	1
O60885/S503A	O60885	BRD4	BRD4_HUMAN	S503A	-	-	p	decrease	SSTDDsEERAQ												MUTAGEN	S->A: Impaired phosphorylation by CK2 and binding to acetylated histones.	23317504	1
O60885/S563N	O60885	BRD4	BRD4_HUMAN	S563N	-	-	-	-	EENKKsAKEPP												VARIANT	S -> N (in dbSNP:rs55970906)	17344846	1
O60885/T598S	O60885	BRD4	BRD4_HUMAN	T598S	-	-	-	-	SKPPPtESEEE												VARIANT	T -> S (in dbSNP:rs34362023)	17344846	1
O75116/D1131A	O75116	ROCK2	ROCK2_HUMAN	D1131A	-	-	-	decrease	LHIGLdSSIGS												MUTAGEN	D->A: Abolishes cleavage by granzyme B.	15699075	1
O75116/D601V	O75116	ROCK2	ROCK2_HUMAN	D601V	-	-	-	-	ESNNRdQDKNC												VARIANT	D -> V (in dbSNP:rs35768389)	17344846	1
O75116/K1083M	O75116	ROCK2	ROCK2_HUMAN	K1083M	-	-	-	-	TQQMIkQKELN												VARIANT	K -> M (in dbSNP:rs34945852)		0
O75116/S1194P	O75116	ROCK2	ROCK2_HUMAN	S1194P	-	-	-	-	QDKEQsPYMVL												VARIANT	S -> P (in a metastatic melanoma sample; somatic mutation)	17344846	1
O75116/T431N	O75116	ROCK2	ROCK2_HUMAN	T431N	-	-	-	neutral	PSCREtSIQSR												VARIANT	T -> N (in dbSNP:rs2230774)	1.73448e+21	3
O75385/K46I	O75385	ULK1	ULK1_HUMAN	K46I	96	β3;Catalytic-Lys	-	loss	LEVAVkINKKN	0	0.999	0.001	0.996	0.988	0.019	0.714	0.991	0.995	0.02	0.535	MUTAGEN	K->I: Abolished serine/threonine-protein kinase activity.	2.09211e+15	2
O75385/P478L	O75385	ULK1	ULK1_HUMAN	P478L	-	-	-	neutral	FARASpPPAHA												VARIANT	P -> L (in dbSNP:rs12827141)	17344846	1
O75385/P714L	O75385	ULK1	ULK1_HUMAN	P714L	-	-	-	neutral	TQAPDpSTESL												VARIANT	P -> L (in dbSNP:rs11546871)	17344846	1
O75385/S298L	O75385	ULK1	ULK1_HUMAN	S298L	872	C-term-αI	-	-	PSYPSsSGSSS	0.312	0.255	0.433	0.536	0.473	0.551	0.532	0.368	0.411	0.639	0.45	VARIANT	S -> L (in dbSNP:rs56364352)	17344846	1
O75385/S665L	O75385	ULK1	ULK1_HUMAN	S665L	-	-	-	neutral	TLPDLsVGPFH												VARIANT	S -> L (in dbSNP:rs55815560)	17344846	1
O75385/S784C	O75385	ULK1	ULK1_HUMAN	S784C	-	-	-	-	TGSASsARHLV												VARIANT	S -> C (in a lung adenocarcinoma sample; somatic mutation)	17344846	1
O75385/T503M	O75385	ULK1	ULK1_HUMAN	T503M	-	-	-	-	GGRPYtSPQVG												VARIANT	T -> M (in dbSNP:rs55824543)	17344846	1
O75385/T816A	O75385	ULK1	ULK1_HUMAN	T816A	-	-	-	neutral	FADPItNLEGA												VARIANT	T -> A (in dbSNP:rs11609348)	96930359872452	2
O75385/V290M	O75385	ULK1	ULK1_HUMAN	V290M	864	C-term-αI	-	-	RKSPPvVPSYP	0.847	0.05	0.103	0.142	0.19	0.361	0.219	0.195	0.141	0.614	0.149	VARIANT	V -> M (in an ovarian mucinous carcinoma sample; somatic mutation; dbSNP:rs370624303)	17344846	1
O75460/C109S	O75460	ERN1	ERN1_HUMAN	C109S	-	-	-	-	VQASPcSSDGI												MUTAGEN	C->S: No effect on dimerization. No effect on interaction with P4HB; when associated with S-148 and S-332.	1.26375e+15	2
O75460/C148S	O75460	ERN1	ERN1_HUMAN	C148S	-	-	-	-	FADSLcSTSLL												MUTAGEN	C->S: No effect on dimerization. Weakens dimer; when associated with S-332. Abolishes interaction with PDIA6. Prolonged splicing of XBP1, probably due to prolonged activation of PDIA6. Inhibits formation of oxidized multimeric forms of ERN1 in response to ER stress. No effect on interaction with P4HB; when associated with S-109 and S-332.	1.26375e+23	3
O75460/C332S	O75460	ERN1	ERN1_HUMAN	C332S	-	-	-	-	GDKGEcITPST												MUTAGEN	C->S: No effect on dimerization. Weakens dimer; when associated with S-148. No effect on interaction with P4HB; when associated with S-109 and S-148.	1.26375e+15	2
O75460/D123P	O75460	ERN1	ERN1_HUMAN	D123P	-	-	-	loss	MGKKQdWYVID												MUTAGEN	D->P: Abolishes ability to homodimerize.	16973740	1
O75460/K599A	O75460	ERN1	ERN1_HUMAN	K599A	96	β3;Catalytic-Lys	-	loss	RDVAVkILPEC	0.003	0.996	0.001	0.996	0.991	0.01	0.663	0.993	0.995	0.013	0.542	MUTAGEN	K->A: Loss of autophosphorylation and of endoribonuclease activity. Inhibition of growth arrest.	111757489637683	2
O75460/L474R	O75460	ERN1	ERN1_HUMAN	L474R	-	-	-	-	HQQQQlHQQFQ												VARIANT	L -> R (in a lung adenocarcinoma sample; somatic mutation; dbSNP:rs186305118)	17344846	1
O75460/N244S	O75460	ERN1	ERN1_HUMAN	N244S	-	-	-	-	KVMHInAVETL												VARIANT	N -> S (in a renal clear cell carcinoma sample; somatic mutation; dbSNP:rs1397145500)	17344846	1
O75460/N700S	O75460	ERN1	ERN1_HUMAN	N700S	463	Catalytic-loop	-	-	LISMPnHGKIK	0.64	0.125	0.235	0.238	0.218	0.481	0.285	0.244	0.149	0.685	0.227	VARIANT	N -> S (in dbSNP:rs918253870)	17344846	1
O75460/P830L	O75460	ERN1	ERN1_HUMAN	P830L	850	αI	-	-	HVLKHpFWSLE	0.293	0.453	0.254	0.534	0.575	0.341	0.474	0.563	0.549	0.343	0.494	VARIANT	P -> L (in an ovarian serous carcinoma sample; somatic mutation; dbSNP:rs1279653488)	17344846	1
O75460/Q105E	O75460	ERN1	ERN1_HUMAN	Q105E	-	-	-	decrease	IPELVqSPCRS												MUTAGEN	Q->E: Impaired ability to homodimerize.	16973740	1
O75460/R635W	O75460	ERN1	ERN1_HUMAN	R635W	217	β4/β5-loop	-	-	CTEKDrFQYIA	0.322	0.327	0.35	0.572	0.537	0.479	0.506	0.421	0.47	0.544	0.405	VARIANT	R -> W (in a gastric adenocarcinoma sample; somatic mutation; dbSNP:rs146710304)	17344846	1
O75460/S769F	O75460	ERN1	ERN1_HUMAN	S769F	600	αF	-	-	FYYVIsGSHPF	0.207	0.396	0.396	0.595	0.663	0.47	0.595	0.47	0.577	0.607	0.457	VARIANT	S -> F (in a glioblastoma multiforme sample; somatic mutation)	17344846	1
O75460/V418M	O75460	ERN1	ERN1_HUMAN	V418M	-	-	-	-	NAPTTvRDVEE												VARIANT	V -> M (in dbSNP:rs55869215)	17344846	1
O75460/W125A	O75460	ERN1	ERN1_HUMAN	W125A	-	-	-	loss	KKQDIwVIDLL												MUTAGEN	W->A: Abolishes ability to homodimerize.	16973740	1
O75582/D195A	O75582	RPS6KA5	KS6A5_HUMAN	D195A	479	A-loop;DFG-motif	-	loss	HVVLTdGLSKE	0.054	0.912	0.035	0.936	0.927	0.129	0.587	0.895	0.868	0.135	0.614	MUTAGEN	D->A: Loss of kinase activity.	9687510	1
O75582/D554N	O75582	RPS6KA5	KS6A5_HUMAN	D554N	438	Catalytic-loop	-	-	NLLFTdNDNLE	0.37	0.254	0.375	0.398	0.395	0.51	0.448	0.343	0.358	0.63	0.328	VARIANT	D -> N (in dbSNP:rs55911249)	17344846	1
O75582/D565A	O75582	RPS6KA5	KS6A5_HUMAN	D565A	479	A-loop;DFG-motif	-	loss	EIKIIdGFARL	0.015	0.963	0.022	0.971	0.967	0.066	0.642	0.957	0.952	0.05	0.589	MUTAGEN	D->A: Loss of kinase activity.	9687510	1
O75582/H190R	O75582	RPS6KA5	KS6A5_HUMAN	H190R	465	Catalytic-loop	-	-	LDSNGhVLTDF	0.232	0.471	0.296	0.662	0.654	0.442	0.559	0.559	0.646	0.41	0.55	VARIANT	H -> R (in dbSNP:rs34699345)		0
O75582/P574L	O75582	RPS6KA5	KS6A5_HUMAN	P574L	499	A-loop	-	-	ARLKPpNQPLK	0.357	0.296	0.347	0.48	0.479	0.452	0.448	0.417	0.471	0.531	0.428	VARIANT	P -> L (in dbSNP:rs34604933)	17344846	1
O75582/S212A	O75582	RPS6KA5	KS6A5_HUMAN	S212A	529	A-loop	p	loss	TERAYsCGTIE	0.014	0.892	0.094	0.975	0.982	0.274	0.867	0.758	0.964	0.276	0.45	MUTAGEN	S->A: Inactivates the N-terminal kinase domain.	15568999	1
O75582/S360A	O75582	RPS6KA5	KS6A5_HUMAN	S360A	-	-	p	decrease	MDPTYsAALPQ												MUTAGEN	S->A: Decreases kinase activity by 60% in response to PMA and UV-C.	15568999	1
O75582/S376A	O75582	RPS6KA5	KS6A5_HUMAN	S376A	-	-	p	loss	LFQGYsVAPSI												MUTAGEN	S->A: Loss of kinase activity, and decreases the phosphorylation of S-360 and T-581.	15568999	1
O75582/T581A	O75582	RPS6KA5	KS6A5_HUMAN	T581A	529	A-loop	p	loss	NQPLKtCFTLH	0.021	0.872	0.107	0.977	0.985	0.277	0.898	0.786	0.975	0.242	0.541	MUTAGEN	T->A: Loss of kinase activity, and blocks phosphorylation of S-212; S-376 and S-381 in response to		0
O75582/T700A	O75582	RPS6KA5	KS6A5_HUMAN	T700A	866	C-term-αI	-	decrease	SNPLMtDILGS	0.35	0.393	0.258	0.52	0.529	0.463	0.407	0.41	0.433	0.51	0.269	MUTAGEN	T->A,D: Strongly reduces phosphorylation of T-581 in response to PMA and UV-C.	17117922	1
O75582/T700D	O75582	RPS6KA5	KS6A5_HUMAN	T700D	866	C-term-αI	-	decrease	SNPLMtDILGS	0.239	0.343	0.418	0.573	0.483	0.608	0.55	0.356	0.493	0.636	0.336	MUTAGEN	T->A,D: Strongly reduces phosphorylation of T-581 in response to PMA and UV-C.	17117922	1
O75582/Y599C	O75582	RPS6KA5	KS6A5_HUMAN	Y599C	579	A-loop	-	-	LNQNGyESCDL	0.124	0.522	0.355	0.724	0.743	0.394	0.606	0.606	0.735	0.427	0.564	VARIANT	Y -> C (in dbSNP:rs55968863)	17344846	1
O75676/F709A	O75676	RPS6KA4	KS6A4_HUMAN	F709A	-	-	-	increase	ATFMAfRGKRE												MUTAGEN	F->A: Strongly elevates basal activity.	11035004	1
O75676/S236L	O75676	RPS6KA4	KS6A4_HUMAN	S236L	608	αF/αG-loop	-	-	LLTGAsFTLEG	0.27	0.275	0.454	0.536	0.543	0.516	0.523	0.416	0.475	0.637	0.432	VARIANT	S -> L (in a breast infiltrating ductal carcinoma sample; somatic mutation; dbSNP:rs746466314)	17344846	1
O75676/S758A	O75676	RPS6KA4	KS6A4_HUMAN	S758A	-	-	-	neutral	RAPVAsGAPRR												VARIANT	S -> A (in dbSNP:rs17857342)	17344846	1
O75716/C6S	O75716	STK16	STK16_HUMAN	C6S	15	N-term-β1	-	-	MGHALcCSRGT	0.256	0.319	0.426	0.61	0.614	0.527	0.561	0.427	0.591	0.565	0.499	MUTAGEN	C->S: Loss of palmitoylation.	10364453	1
O75716/C8S	O75716	STK16	STK16_HUMAN	C8S	17	N-term-β1	-	-	HALCVcRGTVI	0.204	0.515	0.282	0.691	0.677	0.383	0.573	0.643	0.715	0.397	0.542	MUTAGEN	C->S: Loss of palmitoylation.	10364453	1
O75716/E55K	O75716	STK16	STK16_HUMAN	E55K	111	β3/αC-loop	-	-	RILCHeQDREE	0.464	0.25	0.286	0.42	0.298	0.467	0.345	0.332	0.293	0.61	0.348	VARIANT	E -> K (in dbSNP:rs35947471)	17344846	1
O75716/H41R	O75716	STK16	STK16_HUMAN	H41R	76	β2/β3-loop	-	-	LVEGLhGHFYA	0.488	0.245	0.267	0.385	0.411	0.486	0.344	0.353	0.321	0.56	0.247	VARIANT	H -> R (in dbSNP:rs34799131)	17344846	1
O75716/I77V	O75716	STK16	STK16_HUMAN	I77V	178	αC/β4-loop	-	-	FNHPNiRLVAY	0.737	0.103	0.16	0.288	0.287	0.452	0.224	0.239	0.177	0.639	0.267	VARIANT	I -> V (in dbSNP:rs34282267)	17344846	1
O75716/P277L	O75716	STK16	STK16_HUMAN	P277L	827	αH/αI-loop	-	-	MMTVDpQRPHI	0.301	0.366	0.333	0.554	0.581	0.538	0.515	0.479	0.499	0.582	0.492	VARIANT	P -> L (in dbSNP:rs35454203)	17344846	1
O75716/R266W	O75716	STK16	STK16_HUMAN	R266W	814	αH	-	neutral	HSSALrLLNSM	0.494	0.215	0.291	0.403	0.363	0.401	0.416	0.375	0.329	0.596	0.343	VARIANT	R -> W (in dbSNP:rs17849638)	1.54893e+15	2
O75914/A380E	O75914	PAK3	PAK3_HUMAN	A380E	372	αE	-	-	DEGQIaVCREC	0.172	0.497	0.331	0.655	0.63	0.492	0.573	0.532	0.595	0.509	0.48	VARIANT	A -> E (in XLID30; dbSNP:rs121434613)	12884430	1
O75914/R67C	O75914	PAK3	PAK3_HUMAN	R67C	-	-	-	-	KKEKErEISLP												VARIANT	R -> C (in XLID30; dbSNP:rs121434612)	10946356	1
O75914/T440S	O75914	PAK3	PAK3_HUMAN	T440S	536	A-loop	-	-	STMVGtYWMAP	0.119	0.681	0.201	0.771	0.776	0.37	0.633	0.68	0.818	0.288	0.524	VARIANT	T -> S (in a colorectal adenocarcinoma sample; somatic mutation)	17344846	1
O75962/D1368V	O75962	TRIO	TRIO_HUMAN	D1368V	-	-	-	-	EQLPEdGHCFV												VARIANT	D -> V (found in patient with severe intellectual disability; unknown pathological significance)	23033978	1
O75962/D348E	O75962	TRIO	TRIO_HUMAN	D348E	-	-	-	-	RLFEQdEKMFD												VARIANT	D -> E (in dbSNP:rs16903367)		0
O75962/E1299A	O75962	TRIO	TRIO_HUMAN	E1299A	-	-	-	decrease	EFIMAeIQTEK												MUTAGEN	E->A: 50% decrease in nucleotide exchange activity.	9790533	1
O75962/E1299K	O75962	TRIO	TRIO_HUMAN	E1299K	-	-	-	decrease	EFIMAeIQTEK												VARIANT	E -> K (in MRD44; severely decreased activation of RAC1-mediated signaling; severely decreased neurite outgrowth)	32109419	1
O75962/N1080I	O75962	TRIO	TRIO_HUMAN	N1080I	-	-	-	increase	TLARRnDVFLK												VARIANT	N -> I (in MRD63; slightly increased occipitofrontal circumference; increased activation of RAC1-mediated signaling; increased neurite outgrowth; dbSNP:rs879255628)	2.74185e+15	2
O75962/N1389A	O75962	TRIO	TRIO_HUMAN	N1389A	-	-	-	-	VTYCKnPDSTQ												MUTAGEN	N->A: No change in nucleotide exchange activity.	9790533	1
O75962/R1078G	O75962	TRIO	TRIO_HUMAN	R1078G	-	-	-	increase	ACTLArNADVF												VARIANT	R -> G (in MRD63; increased activation of RAC1-mediated signaling; increased neurite outgrowth)	32109419	1
O75962/R1078Q	O75962	TRIO	TRIO_HUMAN	R1078Q	-	-	-	increase	ACTLArNADVF												VARIANT	R -> Q (in MRD63; increased activation of RAC1-mediated signaling; increased neurite outgrowth)	32109419	1
O75962/R1078W	O75962	TRIO	TRIO_HUMAN	R1078W	-	-	-	increase	ACTLArNADVF												VARIANT	R -> W (in MRD63; increased activation of RAC1-mediated signaling; increased neurite outgrowth; dbSNP:rs1554065887)	32109419	1
O75962/R924S	O75962	TRIO	TRIO_HUMAN	R924S	-	-	-	-	VLGWIrGESML												VARIANT	R -> S (in MRD44; unknown pathological significance; dbSNP:rs772072746)	26721934	1
O75962/S291T	O75962	TRIO	TRIO_HUMAN	S291T	-	-	-	-	IQSSEsPKKNS												VARIANT	S -> T (in dbSNP:rs55772118)	17344846	1
O75962/T1075I	O75962	TRIO	TRIO_HUMAN	T1075I	-	-	-	increase	FLKACtARRNA												VARIANT	T -> I (in MRD63; slightly increased occipitofrontal circumference; increased activation of RAC1-mediated signaling; increased lamellipodia formation)	32109419	1
O75962/T1303A	O75962	TRIO	TRIO_HUMAN	T1303A	-	-	-	decrease	AELIQtKAYVR												MUTAGEN	T->A: 40% decrease in nucleotide exchange activity.	9790533	1
O75962/Y1238H	O75962	TRIO	TRIO_HUMAN	Y1238H	-	-	-	-	LRMEKyTSLEK												VARIANT	Y -> H (in MRD44; unknown pathological significance; dbSNP:rs756004023)	26721934	1
O76039/A374T	O76039	CDKL5	CDKL5_HUMAN	A374T	-	-	-	-	GNLAGaLSPLH												VARIANT	A -> T (in a metastatic melanoma sample; somatic mutation)	17344846	1
O76039/A40V	O76039	CDKL5	CDKL5_HUMAN	A40V	93	β3	-	decrease	THEIVaKKFKD	0.324	0.494	0.181	0.476	0.498	0.344	0.461	0.549	0.598	0.407	0.458	VARIANT	A -> V (in DEE2; causes mislocalization of the protein in the cytoplasm; dbSNP:rs122460159)	1.79936e+15	2
O76039/C152F	O76039	CDKL5	CDKL5_HUMAN	C152F	478	Catalytic-loop	-	decrease	DVLKLcFGFAR	0.185	0.543	0.271	0.756	0.684	0.349	0.524	0.564	0.715	0.386	0.668	VARIANT	C -> F (in DEE2; affect activity; causes mislocalization of the protein in the cytoplasm; dbSNP:rs122460157)	1.54995e+15	2
O76039/C291Y	O76039	CDKL5	CDKL5_HUMAN	C291Y	846	αI	-	-	YLTEQcNHPTF	0.257	0.346	0.397	0.621	0.589	0.496	0.519	0.405	0.567	0.571	0.535	VARIANT	C -> Y (in DEE2; dbSNP:rs267606714)	18809835	1
O76039/G207E	O76039	CDKL5	CDKL5_HUMAN	G207E	604	αF/αG-loop	-	-	GELSDgPLFPG	0.14	0.501	0.359	0.729	0.732	0.497	0.685	0.545	0.72	0.536	0.597	VARIANT	G -> E (in DEE2)	23708187	1
O76039/H127R	O76039	CDKL5	CDKL5_HUMAN	H127R	393	αE	-	-	AIHWChNDIVH	0.119	0.555	0.326	0.722	0.707	0.416	0.637	0.594	0.687	0.41	0.512	VARIANT	H -> R (in DEE2; dbSNP:rs267608468)	19241098	1
O76039/H145Y	O76039	CDKL5	CDKL5_HUMAN	H145Y	439	Catalytic-loop	-	-	NLLIShDVLKL	0.46	0.187	0.354	0.375	0.322	0.575	0.4	0.24	0.27	0.708	0.244	VARIANT	H -> Y (in DEE2; unknown pathological significance)	23708187	1
O76039/H581Y	O76039	CDKL5	CDKL5_HUMAN	H581Y	-	-	-	-	HMDSShHSLSA												VARIANT	H -> Y (in DEE2; unknown pathological significance)	23708187	1
O76039/I72N	O76039	CDKL5	CDKL5_HUMAN	I72N	178	αC/β4-loop	-	-	LKQENiELKEA	0.171	0.645	0.183	0.71	0.705	0.295	0.53	0.66	0.692	0.294	0.604	VARIANT	I -> N (in DEE2; dbSNP:rs62641235)	16015284	1
O76039/I72T	O76039	CDKL5	CDKL5_HUMAN	I72T	178	αC/β4-loop	-	-	LKQENiELKEA	0.145	0.568	0.287	0.709	0.698	0.436	0.587	0.592	0.675	0.42	0.592	VARIANT	I -> T (in DEE2; dbSNP:rs62641235)	19241098	1
O76039/L182P	O76039	CDKL5	CDKL5_HUMAN	L182P	545	A-loop	-	-	YRSPElLGAPY	0.133	0.634	0.233	0.797	0.743	0.334	0.574	0.67	0.787	0.335	0.637	VARIANT	L -> P (in DEE2)	23708187	1
O76039/L220P	O76039	CDKL5	CDKL5_HUMAN	L220P	669	αG/αH-loop	-	decrease	SEIDQlTIQKV	0.165	0.643	0.191	0.809	0.722	0.3	0.555	0.681	0.773	0.281	0.625	VARIANT	L -> P (in DEE2; causes mislocalization of the protein in the cytoplasm; dbSNP:rs267608511)	1.79936e+15	2
O76039/N368H	O76039	CDKL5	CDKL5_HUMAN	N368H	-	-	-	-	NESFLnNLAGA												VARIANT	N -> H (in a colorectal cancer sample; somatic mutation)	16959974	1
O76039/N399T	O76039	CDKL5	CDKL5_HUMAN	N399T	-	-	-	-	SKDLTnNIPHL												VARIANT	N -> T (in DEE2; dbSNP:rs267608611)	19253388	1
O76039/P180L	O76039	CDKL5	CDKL5_HUMAN	P180L	543	A-loop;APE-motif	-	-	RWYRSpLLLGA	0.252	0.526	0.222	0.587	0.666	0.326	0.51	0.615	0.608	0.323	0.521	VARIANT	P -> L (in DEE2; dbSNP:rs61749704)	16611748	1
O76039/P574Q	O76039	CDKL5	CDKL5_HUMAN	P574Q	-	-	-	-	EELKLpHMDSS												VARIANT	P -> Q (in an ovarian serous carcinoma sample; somatic mutation; dbSNP:rs199897804)	17344846	1
O76039/P647L	O76039	CDKL5	CDKL5_HUMAN	P647L	-	-	-	-	LQLLSpPGEQL												VARIANT	P -> L (probable disease-associated variant found in a patient with autism spectrum disorder)	25969726	1
O76039/Q791P	O76039	CDKL5	CDKL5_HUMAN	Q791P	-	-	-	neutral	KKKKSqVPNSD												VARIANT	Q -> P (in dbSNP:rs35478150)	1.27369e+31	4
O76039/R175S	O76039	CDKL5	CDKL5_HUMAN	R175S	538	A-loop	-	-	EYVATrYRSPE	0.179	0.514	0.306	0.742	0.693	0.422	0.641	0.544	0.737	0.443	0.496	VARIANT	R -> S (in DEE2; affect activity; does not affect the cellular distribution of the protein; dbSNP:rs61749700)	1.54995e+15	2
O76039/R178P	O76039	CDKL5	CDKL5_HUMAN	R178P	541	A-loop	-	-	ATRWYrPELLL	0.094	0.638	0.269	0.748	0.73	0.345	0.586	0.619	0.752	0.332	0.537	VARIANT	R -> P (in DEE2; dbSNP:rs267606715)	18809835	1
O76039/R178Q	O76039	CDKL5	CDKL5_HUMAN	R178Q	541	A-loop	-	-	ATRWYrPELLL	0.13	0.545	0.325	0.651	0.665	0.371	0.561	0.534	0.683	0.4	0.439	VARIANT	R -> Q (in DEE2; dbSNP:rs267606715)	2.36629e+23	3
O76039/R178W	O76039	CDKL5	CDKL5_HUMAN	R178W	541	A-loop	-	-	ATRWYrPELLL	0.13	0.559	0.31	0.725	0.696	0.353	0.616	0.554	0.662	0.37	0.446	VARIANT	R -> W (in DEE2; dbSNP:rs267608493)	26993267	1
O76039/R444C	O76039	CDKL5	CDKL5_HUMAN	R444C	-	-	-	-	RSQQNrSFMES												VARIANT	R -> C (in dbSNP:rs61753977)	16015284	1
O76039/R858C	O76039	CDKL5	CDKL5_HUMAN	R858C	-	-	-	-	ASSDPrQPLTA												VARIANT	R -> C (in DEE2; unknown pathological significance; dbSNP:rs773760466)	23708187	1
O76039/S196L	O76039	CDKL5	CDKL5_HUMAN	S196L	590	αF	-	-	SVDMWsGCILG	0.171	0.601	0.228	0.703	0.751	0.296	0.576	0.64	0.708	0.32	0.464	VARIANT	S -> L (in DEE2; dbSNP:rs267608501)	27864847	1
O76039/T288I	O76039	CDKL5	CDKL5_HUMAN	T288I	842	αI	-	-	ADRYLtQCLNH	0.575	0.149	0.276	0.275	0.215	0.495	0.308	0.213	0.195	0.71	0.189	VARIANT	T -> I (in DEE2; dbSNP:rs267606713)	18809835	1
O76039/T734A	O76039	CDKL5	CDKL5_HUMAN	T734A	-	-	-	-	ENNVStVSSLP												VARIANT	T -> A (in dbSNP:rs55803460)	17344846	1
O76039/V718M	O76039	CDKL5	CDKL5_HUMAN	V718M	-	-	-	-	GSFYRvSPRPD												VARIANT	V -> M (in DEE2; dbSNP:rs267608653)	1.87908e+15	2
O76039/V793A	O76039	CDKL5	CDKL5_HUMAN	V793A	-	-	-	-	KKSQTvNSDSP												VARIANT	V -> A (in DEE2; unknown pathological significance; dbSNP:rs62643617)	16611748	1
O94768/K62A	O94768	STK17B	ST17B_HUMAN	K62A	96	β3;Catalytic-Lys	ub	loss	QEYAAkLKKRR	0.003	0.996	0.002	0.996	0.989	0.013	0.714	0.991	0.995	0.012	0.537	MUTAGEN	K->A: Loss of activity and of apoptotic function.	9786912	1
O94768/S320F	O94768	STK17B	ST17B_HUMAN	S320F	879	C-term-αI	-	neutral	DHSVRsEDKTS	0.781	0.077	0.142	0.269	0.247	0.338	0.205	0.226	0.228	0.663	0.196	VARIANT	S -> F (in dbSNP:rs34740616)	17344846	1
O94804/C947Y	O94804	STK10	STK10_HUMAN	C947Y	-	-	-	-	SEEAEcNPSTP												VARIANT	C -> Y (in dbSNP:rs56355550)	17344846	1
O94804/K277E	O94804	STK10	STK10_HUMAN	K277E	825	αH/αI-loop	-	-	KIALDkPETRP	0.178	0.403	0.42	0.627	0.641	0.559	0.575	0.406	0.552	0.653	0.466	VARIANT	K -> E (in TGCT; somatic mutation; dbSNP:rs757545210)	1.61756e+15	2
O94804/K65I	O94804	STK10	STK10_HUMAN	K65I	96	β3;Catalytic-Lys	-	loss	ALAAAkIETKS	0	0.997	0.003	0.996	0.988	0.023	0.66	0.991	0.995	0.018	0.521	MUTAGEN	K->I: Loss of kinase activity.	12639966	1
O94804/M710T	O94804	STK10	STK10_HUMAN	M710T	-	-	-	-	DLELAmRLTTD												VARIANT	M -> T (in dbSNP:rs34936670)	17344846	1
O94804/N467S	O94804	STK10	STK10_HUMAN	N467S	-	-	-	-	GEKLAnSLEPP												VARIANT	N -> S (in dbSNP:rs56063773)	17344846	1
O94804/P480L	O94804	STK10	STK10_HUMAN	P480L	-	-	-	-	QAAPGpKRDSD												VARIANT	P -> L (in dbSNP:rs34505340)		0
O94804/P520L	O94804	STK10	STK10_HUMAN	P520L	-	-	-	neutral	LSIKDpLYKKT												VARIANT	P -> L (in dbSNP:rs17074311)		0
O94804/R268C	O94804	STK10	STK10_HUMAN	R268C	814	αH	-	-	WSVEFrFLKIA	0.368	0.247	0.385	0.487	0.424	0.509	0.444	0.33	0.351	0.644	0.301	VARIANT	R -> C (in dbSNP:rs35826078)	17344846	1
O94804/R322W	O94804	STK10	STK10_HUMAN	R322W	880	C-term-αI	-	-	EIEDGrEGEEE	0.169	0.418	0.413	0.732	0.657	0.419	0.628	0.531	0.65	0.486	0.518	VARIANT	R -> W (in dbSNP:rs56214442)	17344846	1
O94804/S853L	O94804	STK10	STK10_HUMAN	S853L	-	-	-	neutral	EKRQKsRLQQQ												VARIANT	S -> L (in dbSNP:rs56066852)	17344846	1
O94804/S905T	O94804	STK10	STK10_HUMAN	S905T	-	-	-	-	KALDEsNQNLK												VARIANT	S -> T (in dbSNP:rs55791916)	17344846	1
O94804/S942N	O94804	STK10	STK10_HUMAN	S942N	-	-	-	-	MFFKLsEAECP												VARIANT	S -> N (in dbSNP:rs1128204)		0
O94804/T336I	O94804	STK10	STK10_HUMAN	T336I	-	-	-	-	VDAAStENHTQ												VARIANT	T -> I (in dbSNP:rs55972616)	17344846	1
O94806/A128T	O94806	PRKD3	KPCD3_HUMAN	A128T	-	-	-	-	QLITSaEIHEG												VARIANT	A -> T (in dbSNP:rs17852819)	15489334	1
O94806/I284V	O94806	PRKD3	KPCD3_HUMAN	I284V	-	-	-	-	YTRPTiQYCKR												MUTAGEN	I->V: Slight increase in ability to bind DAG, no effect on phorbol-ester binding.		0
O94806/K293W	O94806	PRKD3	KPCD3_HUMAN	K293W	-	-	-	-	CKRLLkLFRQG												MUTAGEN	K->W: Increased ability to bind DAG, no effect on phorbol-ester binding.	18076381	1
O94806/L445I	O94806	PRKD3	KPCD3_HUMAN	L445I	-	-	-	neutral	LDSKClLFQNE												VARIANT	L -> I (in dbSNP:rs55912911)		0
O94806/N42D	O94806	PRKD3	KPCD3_HUMAN	N42D	-	-	-	neutral	SARLSnSFSAP												VARIANT	N -> D (in dbSNP:rs11896614)		0
O94806/P165G	O94806	PRKD3	KPCD3_HUMAN	P165G	-	-	-	-	HSYKApFCDYC												MUTAGEN	P->G: No effect on ability to bind phorbol ester, loss of ability to bind DAG, reduced DAG-induced membrane translocation.	18076381	1
O94806/P225S	O94806	PRKD3	KPCD3_HUMAN	P225S	-	-	-	neutral	PGLSVpPLQPE												VARIANT	P -> S (in dbSNP:rs34280934)		0
O94806/P282G	O94806	PRKD3	KPCD3_HUMAN	P282G	-	-	-	-	HSYTRpICQYC												MUTAGEN	P->G: No effect on ability to bind phorbol ester, increase in ability to bind DAG.	18076381	1
O94806/Q546R	O94806	PRKD3	KPCD3_HUMAN	Q546R	-	-	-	-	CTSPGqKDHKD												VARIANT	Q -> R (in dbSNP:rs17856887)	15489334	1
O94806/T156A	O94806	PRKD3	KPCD3_HUMAN	T156A	-	-	-	-	QIRPHtYVHSY												MUTAGEN	T->A: Slight loss in ability to bind DAG and phorbol-ester; when associated with F-158.	18076381	1
O94806/T166A	O94806	PRKD3	KPCD3_HUMAN	T166A	-	-	-	-	SYKAPtCDYCG												MUTAGEN	T->A: Slight loss in ability to bind DAG and phorbol-ester.	18076381	1
O94806/V716M	O94806	PRKD3	KPCD3_HUMAN	V716M	475	Catalytic-loop	-	-	EPFPQvLCDFG	0.301	0.334	0.365	0.543	0.533	0.505	0.488	0.415	0.506	0.55	0.518	VARIANT	V -> M (in a glioblastoma multiforme sample; somatic mutation)	17344846	1
O94806/Y158F	O94806	PRKD3	KPCD3_HUMAN	Y158F	-	-	-	-	RPHTLyHSYKA												MUTAGEN	Y->F: Slight loss in ability to bind DAG and phorbol-ester; when associated with A-156.	18076381	1
O94806/Y170F	O94806	PRKD3	KPCD3_HUMAN	Y170F	-	-	-	-	PTFCDyGEMLW												MUTAGEN	Y->F: Slight loss in ability to bind DAG and phorbol-ester.	18076381	1
O94921/K164R	O94921	CDK14	CDK14_HUMAN	K164R	96	β3;Catalytic-Lys	-	loss	KLVALkIRLQE	0.005	0.954	0.041	0.994	0.983	0.051	0.575	0.963	0.992	0.034	0.431	MUTAGEN	K->R: Abolishes protein kinase activity.	1.75176e+15	2
O94921/M432I	O94921	CDK14	CDK14_HUMAN	M432I	865	C-term-αI	-	-	WELTDmSIFTV	0.777	0.103	0.12	0.209	0.177	0.431	0.214	0.196	0.14	0.663	0.205	VARIANT	M -> I (in an ovarian mucinous carcinoma; somatic mutation; dbSNP:rs773301216)	17344846	1
O94921/S463R	O94921	CDK14	CDK14_HUMAN	S463R	-	-	-	-	NSYGKsSNSKH												VARIANT	S -> R (in dbSNP:rs35643773)	17344846	1
O95382/A1061T	O95382	MAP3K6	M3K6_HUMAN	A1061T	-	-	-	-	AQELRaQGRLR												VARIANT	A -> T (in dbSNP:rs55990440)	17344846	1
O95382/G1233A	O95382	MAP3K6	M3K6_HUMAN	G1233A	-	-	-	neutral	LNVDSgIQMLL												VARIANT	G -> A (in dbSNP:rs17162549)		0
O95382/N622K	O95382	MAP3K6	M3K6_HUMAN	N622K	-	-	-	neutral	QAWVTnDSTAP												VARIANT	N -> K (in dbSNP:rs35659744)	17344846	1
O95382/P869T	O95382	MAP3K6	M3K6_HUMAN	P869T	693	αG/αH-loop	-	-	MYKVHpMPSSL	0.213	0.438	0.349	0.604	0.612	0.334	0.522	0.53	0.604	0.438	0.489	VARIANT	P -> T (in a breast cancer sample; somatic mutation)	16959974	1
O95382/R499C	O95382	MAP3K6	M3K6_HUMAN	R499C	-	-	-	neutral	PGGPPrAHFWL												VARIANT	R -> C (in dbSNP:rs11247641)		0
O95382/R544W	O95382	MAP3K6	M3K6_HUMAN	R544W	-	-	-	-	AKLEVrTDPVS												VARIANT	R -> W (in dbSNP:rs55671988)	17344846	1
O95382/R668G	O95382	MAP3K6	M3K6_HUMAN	R668G	59	β2/β3-loop	-	-	YAGRDrTRVRI	0.546	0.147	0.307	0.312	0.327	0.534	0.342	0.256	0.285	0.625	0.26	VARIANT	R -> G (in dbSNP:rs55869163)	17344846	1
O95382/R673L	O95382	MAP3K6	M3K6_HUMAN	R673L	91	β3	-	-	RHTRVrAIKEI	0.381	0.309	0.309	0.542	0.459	0.526	0.489	0.368	0.436	0.529	0.332	VARIANT	R -> L (in dbSNP:rs56359841)	17344846	1
O95382/S925L	O95382	MAP3K6	M3K6_HUMAN	S925L	871	C-term-αI	-	-	HAPRPsAPSAS	0.735	0.076	0.189	0.252	0.303	0.528	0.294	0.227	0.226	0.679	0.191	VARIANT	S -> L (in a breast pleomorphic lobular carcinoma sample; somatic mutation)	17344846	1
O95382/S969N	O95382	MAP3K6	M3K6_HUMAN	S969N	-	-	-	-	SYGGTsLRVPE												VARIANT	S -> N (in dbSNP:rs17856498)	15489334	1
O95382/T455I	O95382	MAP3K6	M3K6_HUMAN	T455I	-	-	-	-	LANDPtVVLAA												VARIANT	T -> I (in dbSNP:rs1138294)	1.54893e+15	2
O95382/T968I	O95382	MAP3K6	M3K6_HUMAN	T968I	-	-	-	-	LSYGGtQLRVP												VARIANT	T -> I (in an ovarian endometrioid cancer sample; somatic mutation)	17344846	1
O95747/K46A	O95747	OXSR1	OXSR1_HUMAN	K46A	96	β3;Catalytic-Lys	-	loss	EKVAIkINLEK	0.003	0.996	0.001	0.996	0.988	0.008	0.648	0.992	0.995	0.008	0.555	MUTAGEN	K->A: Loss of autophosphorylation and kinase activity.	1.47071e+15	2
O95747/K46M	O95747	OXSR1	OXSR1_HUMAN	K46M	96	β3;Catalytic-Lys	-	loss	EKVAIkINLEK	0	0.999	0.001	0.996	0.996	0.01	0.686	0.992	0.994	0.008	0.557	MUTAGEN	K->M: Loss of RELT, RELL1 and RELL2 phosphorylation. Retention of some autophosphorylation activity may be due to complex formation with other endogenous kinases in the assay.	1.47071e+15	2
O95747/P433S	O95747	OXSR1	OXSR1_HUMAN	P433S	-	-	-	-	QETKIpSLVLR												VARIANT	P -> S (in a metastatic melanoma sample; somatic mutation)	17344846	1
O95747/S425T	O95747	OXSR1	OXSR1_HUMAN	S425T	-	-	p	-	ALSSGsSQETK												VARIANT	S -> T (in dbSNP:rs35295772)		0
O95747/T304I	O95747	OXSR1	OXSR1_HUMAN	T304I	865	C-term-αI	-	neutral	FLQEKtQRAPT	0.785	0.077	0.137	0.228	0.212	0.373	0.278	0.181	0.15	0.685	0.2	VARIANT	T -> I (in dbSNP:rs6599079)	1.00837e+15	2
O95819/S712T	O95819	MAP4K4	M4K4_HUMAN	S712T	-	-	p	-	RSSSKsGSPSQ												VARIANT	S -> T	17344846	1
O95835/F641L	O95835	LATS1	LATS1_HUMAN	F641L	-	-	-	-	PQAFKfMEQHV												VARIANT	F -> L (in dbSNP:rs35163691)	17344846	1
O95835/G1000S	O95835	LATS1	LATS1_HUMAN	G1000S	841	αI	-	-	RLGKNgDEIKA	0.271	0.282	0.447	0.571	0.485	0.512	0.501	0.35	0.413	0.607	0.509	VARIANT	G -> S (in dbSNP:rs56412005)	17344846	1
O95835/K734A	O95835	LATS1	LATS1_HUMAN	K734A	96	β3;Catalytic-Lys	-	loss	ALYATkLRKKD	0.003	0.996	0.002	0.988	0.991	0.013	0.666	0.992	0.995	0.026	0.562	MUTAGEN	K->A: Loss of kinase activity, autophosphorylation, increased ploidy, prolonged duration of mitosis and lack of p53 expression.	15122335	1
O95835/M669I	O95835	LATS1	LATS1_HUMAN	M669I	-	-	-	-	LENEMmVGLSQ												VARIANT	M -> I (in a lung adenocarcinoma sample; somatic mutation; dbSNP:rs1390558952)	17344846	1
O95835/P237Q	O95835	LATS1	LATS1_HUMAN	P237Q	-	-	-	-	QRVNPpPPQVR												VARIANT	P -> Q (in dbSNP:rs56149740)	17344846	1
O95835/P531S	O95835	LATS1	LATS1_HUMAN	P531S	-	-	-	-	TVQPSpPEGTA												VARIANT	P -> S (in dbSNP:rs55874734)	17344846	1
O95835/R370W	O95835	LATS1	LATS1_HUMAN	R370W	-	-	-	-	AGTVNrPPPPY												VARIANT	R -> W (in dbSNP:rs56348064)	17344846	1
O95835/R806P	O95835	LATS1	LATS1_HUMAN	R806P	372	αE	-	-	PESLArYIAEL	0.148	0.523	0.329	0.743	0.744	0.419	0.547	0.58	0.731	0.442	0.482	VARIANT	R -> P (in a lung large cell carcinoma sample; somatic mutation)	17344846	1
O95835/R96W	O95835	LATS1	LATS1_HUMAN	R96W	-	-	-	neutral	ETNSSrTSEVN												VARIANT	R -> W (in dbSNP:rs55945045)	17344846	1
O95835/S204G	O95835	LATS1	LATS1_HUMAN	S204G	-	-	-	neutral	AYHSEsNSQTD												VARIANT	S -> G (in dbSNP:rs34793526)	17344846	1
O95835/S464A	O95835	LATS1	LATS1_HUMAN	S464A	-	-	p	loss	PVRSNsNNPLG												MUTAGEN	S->A: Abolishes phosphorylation by NUAK1 and NUAK2.	19927127	1
O95835/Y559F	O95835	LATS1	LATS1_HUMAN	Y559F	-	-	-	decrease	GPPPPyKHLLH												MUTAGEN	Y->F: Loss of interaction with YAP1.	18158288	1
O96013/A139T	O96013	PAK4	PAK4_HUMAN	A139T	-	-	-	-	SRGRFaHSEAG												VARIANT	A -> T (in dbSNP:rs35655056)	17344846	1
O96013/R135Q	O96013	PAK4	PAK4_HUMAN	R135Q	-	-	-	neutral	GKAGSrRFAGH												VARIANT	R -> Q (in dbSNP:rs56099436)	17344846	1
O96013/S445N	O96013	PAK4	PAK4_HUMAN	S445N	431	Catalytic-loop	-	activating	DIKSDsLLTHD	0.234	0.268	0.498	0.65	0.671	0.491	0.601	0.389	0.533	0.595	0.469	MUTAGEN	S->N: Approximately 30-fold increased autophosphorylation (constitutively active mutant).	11313478	1
O96013/S474E	O96013	PAK4	PAK4_HUMAN	S474E	529	A-loop	p	increase	VPRRKsVGTPY	0.004	0.193	0.802	0.99	0.99	0.786	0.981	0.367	0.951	0.712	0.546	MUTAGEN	S->E: Approximately 3-fold increased autophosphorylation.	11313478	1
O96017/A17S	O96017	CHEK2	CHK2_HUMAN	A17S	-	-	-	-	SHGSSaSQPHG												VARIANT	A -> S (in an osteogenic sarcoma sample; somatic mutation; might influence susceptibility to breast cancer; does not cause protein abrogation in familial colorectal cancer; dbSNP:rs137853008)	11746983	1
O96017/D347A	O96017	CHEK2	CHK2_HUMAN	D347A	426	Catalytic-loop;HrD-motif	-	loss	GIIHRdKPENV	0.016	0.936	0.048	0.945	0.969	0.149	0.681	0.88	0.946	0.094	0.57	MUTAGEN	D->A: Loss of kinase activity and of the ability to phosphorylate CDC25A.	112984569836640	2
O96017/D347N	O96017	CHEK2	CHK2_HUMAN	D347N	426	Catalytic-loop;HrD-motif	-	-	GIIHRdKPENV	0.034	0.876	0.091	0.934	0.939	0.207	0.668	0.863	0.933	0.134	0.502	VARIANT	D -> N (in dbSNP:rs28909980)		0
O96017/D368N	O96017	CHEK2	CHK2_HUMAN	D368N	479	A-loop;DFG-motif	-	loss	LIKITdGHSKI	0.026	0.92	0.054	0.938	0.95	0.122	0.634	0.897	0.918	0.1	0.59	MUTAGEN	D->N: Loss of autophosphorylation activity.	15342622	1
O96017/E239K	O96017	CHEK2	CHK2_HUMAN	E239K	55	β2/β3-loop	-	-	VKLAFeKTCKK	0.516	0.168	0.317	0.318	0.38	0.544	0.402	0.286	0.278	0.652	0.324	VARIANT	E -> K (in prostate cancer; germline mutation; dbSNP:rs121908702)	12533788	1
O96017/E501K	O96017	CHEK2	CHK2_HUMAN	E501K	867	C-term-αI	-	-	QDLLSeNESTA	0.818	0.068	0.113	0.193	0.135	0.381	0.167	0.181	0.132	0.689	0.168	VARIANT	E -> K (in dbSNP:rs17883172)		0
O96017/E64K	O96017	CHEK2	CHK2_HUMAN	E64K	-	-	-	-	TLSSLeVSTQE												VARIANT	E -> K (in prostate cancer; somatic mutation; dbSNP:rs141568342)	12533788	1
O96017/F447I	O96017	CHEK2	CHK2_HUMAN	F447I	691	αG/αH-loop	-	-	SGKYNfPEVWA	0.754	0.105	0.14	0.267	0.245	0.455	0.292	0.263	0.241	0.615	0.231	VARIANT	F -> I (in dbSNP:rs17881473)		0
O96017/G167R	O96017	CHEK2	CHK2_HUMAN	G167R	-	-	-	-	DHSGNgFVNTE												VARIANT	G -> R (in prostate cancer; somatic mutation; dbSNP:rs72552322)	12533788	1
O96017/H371Y	O96017	CHEK2	CHK2_HUMAN	H371Y	482	A-loop	-	decrease	ITDFGhKILGE	0.524	0.184	0.292	0.529	0.492	0.595	0.431	0.355	0.471	0.648	0.248	VARIANT	H -> Y (confers a moderate risk of breast cancer; partially reduces kinase activity; dbSNP:rs531398630)	21618645	1
O96017/I157T	O96017	CHEK2	CHK2_HUMAN	I157T	-	-	-	decrease,neutral	PKNSYiYIEDH												VARIANT	I -> T (might influence susceptibility to different types of cancer; does not cause protein abrogation in familial colorectal cancer; loss of the ability to interact with and phosphorylate CDC25A and to promote CDC25A degradation in response to ionizing radiation; dbSNP:rs17879961)	1.06175e+103	13
O96017/I251F	O96017	CHEK2	CHK2_HUMAN	I251F	98	β3	-	-	VAIKIiKRKFA	0.279	0.318	0.403	0.631	0.601	0.524	0.587	0.474	0.559	0.523	0.488	VARIANT	I -> F (in prostate cancer; unknown pathological significance; dbSNP:rs587780189)	12533788	1
O96017/I448S	O96017	CHEK2	CHK2_HUMAN	I448S	692	αG/αH-loop	-	neutral	GKYNFiEVWAE	0.648	0.129	0.222	0.272	0.218	0.512	0.276	0.247	0.213	0.677	0.237	VARIANT	I -> S (in dbSNP:rs17886163)		0
O96017/L436M	O96017	CHEK2	CHK2_HUMAN	L436M	649	αG	-	-	RTQVSlDQITS	0.869	0.057	0.075	0.143	0.156	0.407	0.184	0.164	0.113	0.638	0.193	VARIANT	L -> M (in dbSNP:rs17882922)		0
O96017/L512V	O96017	CHEK2	CHK2_HUMAN	L512V	878	C-term-αI	-	-	ALPQVlQPSTS	0.81	0.074	0.117	0.13	0.128	0.366	0.168	0.136	0.135	0.649	0.199	VARIANT	L -> V (in dbSNP:rs17882942)		0
O96017/N446K	O96017	CHEK2	CHK2_HUMAN	N446K	690	αG/αH-loop	-	-	TSGKYnIPEVW	0.89	0.037	0.073	0.129	0.124	0.377	0.153	0.131	0.082	0.699	0.129	VARIANT	N -> K (in dbSNP:rs17880867)		0
O96017/P85L	O96017	CHEK2	CHK2_HUMAN	P85L	-	-	-	-	PEDQEpEPTPA												VARIANT	P -> L (in an osteogenic sarcoma sample; neutral allele among Ashkenazi Jewish women; dbSNP:rs17883862)	1.1747e+15	2
O96017/R117G	O96017	CHEK2	CHK2_HUMAN	R117G	-	-	-	-	NYWFGrKSCEY												VARIANT	R -> G (in BC; dbSNP:rs28909982)	1.24548e+23	3
O96017/R137Q	O96017	CHEK2	CHK2_HUMAN	R137Q	-	-	-	-	RTDKYrYSKKH												VARIANT	R -> Q (might influence susceptibility to breast cancer; does not cause protein abrogation in familial colorectal cancer; dbSNP:rs368570187)	1.24548e+15	2
O96017/R145P	O96017	CHEK2	CHK2_HUMAN	R145P	-	-	-	-	SKKHFrFREVG												VARIANT	R -> P (in prostate cancer; somatic mutation; dbSNP:rs587781667)	12533788	1
[truncated: 5,727 more rows]

## Sheet: C gnomAD
Table S3C: Prediction results of the predictors on Variants with no/low homozygous counts in gnomAD
[truncated: 53,691 more rows]
